# Supplementary material for: Thiourea as a precatalyst for the electron donor–acceptor complex photoactivation platform of oxime esters
Source: Royal Society of Chemistry journal article supplement (doi:10.1039/d4qo00424h), 2024-01-01

## Supporting Information

### **Thiourea as a Pre-catalyst for the Electron Donor–Acceptor Complex Photoactivation Platform of Oxime Esters**

Haichen Mao, Yuting Zhang, Hengrong Cao, Qianqian Shi,\* Yu Lan, Junbiao Chang,\* and Bo Zhu\*

State Key Laboratory of Antiviral Drugs, Pingyuan Laboratory, NMPA Key Laboratory for Research and Evaluation of Innovative Drug, Henan Key Laboratory of Organic Functional Molecule and Drug Innovation, School of Chemistry and Chemical Engineering, Henan Normal University, Xinxiang, Henan 453007, China.

E-mail: shiqianqian@htu.edu.cn; changjunbiao@zzu.edu.cn; zbtiantang@126.com.

## Table of Contents

|                                                                                                  |     |
|--------------------------------------------------------------------------------------------------|-----|
| 1. General Information.....                                                                      | S3  |
| 2. Synthesis and Characterization of Catalysts and Substrates.....                               | S3  |
| 2.1 General Procedure for the Synthesis of Thioureas (Thioamides) .....                          | S3  |
| 2.2 General Procedure for the Synthesis of Oxime Esters .....                                    | S6  |
| 2.3 General Procedure for the Synthesis of Silyl Enol Ethers.....                                | S24 |
| 3. Reaction Investigation and Condition Optimization.....                                        | S27 |
| 3.1 Oxime Esters Substituent Screening .....                                                     | S27 |
| 3.2 Irradiation Wavelength Screening.....                                                        | S27 |
| 3.3 Condition Optimization for the Synthesis of Pyrroline 3.....                                 | S28 |
| 3.4 Condition Optimization for the Synthesis of Ketonitrile 5 .....                              | S29 |
| 3.5 Condition Optimization for the Synthesis of Phenanthridine 18 .....                          | S29 |
| 4. Mechanisms Study Experiments.....                                                             | S30 |
| 4.1 On-Off-On Experiment .....                                                                   | S30 |
| 4.2 UV-Vis Absorption Spectroscopic Measurements .....                                           | S30 |
| 4.3 Job's Plot Experiment .....                                                                  | S31 |
| 4.4 NMR Titration Experiment .....                                                               | S32 |
| 4.5 Radical Trap Experiment .....                                                                | S32 |
| 4.6 Radical Clock Experiment .....                                                               | S33 |
| 4.7 Radical Conversion Experiment.....                                                           | S33 |
| 5. Computational Study Experiments .....                                                         | S35 |
| 5.1 Computational Methods .....                                                                  | S35 |
| 5.2 Absolute SPE, GFEC, GFE, and IF of the Optimized Structures .....                            | S35 |
| 5.3 The Energies and Cartesian Coordinates of the Optimized Structures .....                     | S36 |
| 6. Synthesis Procedure and Characterization of Products.....                                     | S55 |
| 6.1. Synthesis Procedure and Characterization of Pyrroline 3.....                                | S55 |
| 6.2. Synthesis Procedure and Characterization of Ketonitrile 5 .....                             | S58 |
| 6.3. Synthesis Procedure and Characterization of Product 12, 14 and 16.....                      | S62 |
| 6.4. Synthesis Procedure and Characterization of Phenanthridine, Quinoline and Pyridine 18 ..... | S64 |
| References .....                                                                                 | S73 |
| NMR Spectra.....                                                                                 | S74 |

## 1. General Information

All reactions involving air- or moisture-sensitive reagents or intermediates were carried out in oven-dried glassware under nitrogen ( $N_2$ ) atmosphere using standard *Schlenk* techniques. All reactions under irradiation were conducted in front of a 20 W LEDs bulb. All commercially available reagents were purchased and used directly without further purification. Thin layer chromatography (TLC) was performed on silica gel plates and visualized by fluorescence quenching under UV light or staining with the standard solution of Phosphomolybdic acid. Flash chromatography was carried out using silica gel (200-300 mesh) under a light positive pressure, eluting with the specified solvent system. Organic solutions were concentrated under reduced pressure on a rotatory evaporator. Isolated yields refer to materials of >95% purity as determined by  $^1H$  NMR.

$^1H$  NMR spectra were recorded on Bruker Bruker 400 MHz and 600 MHz spectrometers. Chemical shifts are reported in parts per million (ppm) and the spectra are calibrated to the resonance resulting from incomplete deuteration of the solvent ( $CDCl_3$ : 7.26ppm, singlet;  $DMSO-d_6$ : 2.50ppm, pentet;  $Acetone-d_6$ : 2.05ppm, pentet).  $^{13}C$  NMR spectra were recorded on the same spectrometer with complete proton decoupling. Chemical shifts are reported in ppm with the solvent resonance as the internal standard ( $^{13}CDCl_3$ : 77.16ppm, triplet;  $DMSO-d_6$ : 39.52ppm, septet;  $Acetone-d_6$ : 29.84ppm, septet). Data are reported as follows: chemical shift  $\delta$ /ppm, multiplicity (s = singlet, d = doublet, t = triplet, q = quartet, p = pentet, m = multiplet or combinations thereof;  $^{13}C$  signals are singlets unless otherwise stated), coupling constants  $J$  in Hz, and integration ( $^1H$  only).  $^{19}F$  NMR spectra were recorded on the same Spectrometers.

High Resolution Mass Spectrometry (HRMS) were all recorded on an ABI/Sciex QStar Mass Spectrometer using a positive electrospray ionization (ESI+). Measured values are reported to 4 decimal places of the calculated value. The calculated values are based on the most abundant isotope.

## 2. Synthesis and Characterization of Catalysts and Substrates

### 2.1 General Procedure for the Synthesis of Thioureas (Thioamides)

#### 2.1.1 General Procedure for the synthesis of thioamides T1 and T2<sup>[1]</sup>

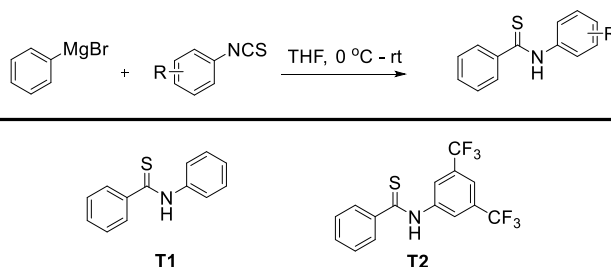

A solution of Phenyl isothiocyanate (1.0 equiv.) in dry THF (0.8 M) under nitrogen was cooled to 0 °C and stirred. Phenylmagnesium bromide (1.0 equiv., 1.0 M in THF) was added dropwise. The mixture was allowed to warm to room temperature, then monitored by TLC. Upon completion, the mixture was diluted with  $H_2O$  and EtOAc. The layers were separated and the aqueous layer was extracted with EtOAc (x2). The combined organic layers were dried over  $Na_2SO_4$ , filtered and evaporated. Purification by column chromatography on silica gel gave the corresponding thioamide.

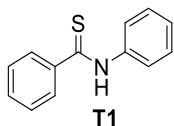

**N-phenylbenzothioamide (T1):** 74% yield as a yellow solid.

$^1H$  NMR (600 MHz,  $DMSO-d_6$ ):  $\delta$  11.78 (s, 1H), 7.86 (d,  $J = 7.2$  Hz, 4H), 7.54 (t,  $J = 7.2$  Hz, 1H), 7.47 (m, 4H), 7.29 (t,  $J = 7.2$  Hz, 1H); Data in accordance with literature.<sup>[1]</sup>

## SUPPORTING INFORMATION

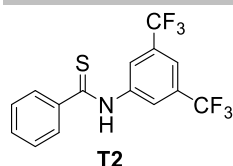

**N-(3,5-bis(trifluoromethyl)phenyl)benzothioamide (T2):** 68% yield as a yellow solid.

<sup>1</sup>H NMR (600 MHz, DMSO-*d*<sub>6</sub>): δ 12.18 (s, 1H), 8.71 (s, 2H), 8.0 (s, 1H), 7.89 (d, *J* = 7.8 Hz, 2H), 7.58 (t, *J* = 7.2 Hz, 1H), 7.50 (t, *J* = 7.2 Hz, 2H); Data in accordance with literature.<sup>[1]</sup>

### 2.1.2 General Procedure for the synthesis of thioureas T4 to T6<sup>[2]</sup>

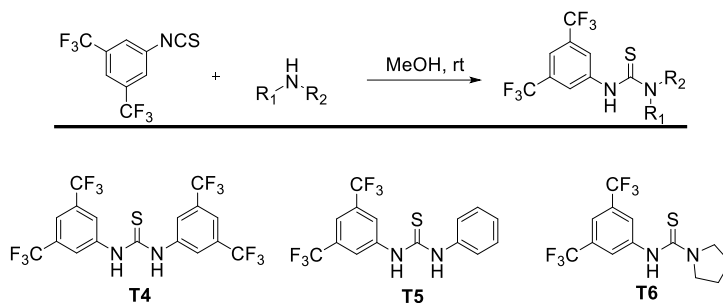

To a solution of 3,5-Bis(trifluoromethyl)phenyl isothiocyanate (1.0 equiv.) in MeOH (0.5 M) was added Amine (1.0 equiv.) dropwise at room temperature. The mixture was allowed to stir for 30 min and monitored by TLC. Upon completion, the solvent was evaporated and the residue was recrystallized from hexane to give the corresponding thiourea.

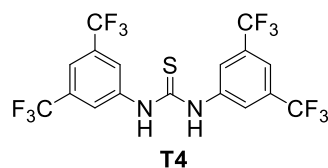

**1,3-Bis(3,5-bis(trifluoromethyl)phenyl)thiourea (T4):** 75% yield as a white solid.

<sup>1</sup>H NMR (600 MHz, DMSO-*d*<sub>6</sub>): δ 10.68 (s, 2H), 8.24 (s, 4H), 7.85 (s, 2H); Data in accordance with literature.<sup>[2]</sup>

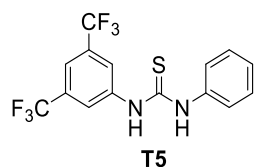

**1-(3,5-Bis(trifluoromethyl)phenyl)-3-phenylthiourea (T5):** 82% yield as a white solid.

<sup>1</sup>H NMR (600 MHz, DMSO-*d*<sub>6</sub>): δ 10.33 (s, 1H), 10.25 (s, 1H), 8.28 (s, 2H), 7.78 (s, 1H), 7.47 (d, *J* = 8.4 Hz, 2H), 7.39 (t, *J* = 5.4 Hz, 2H), 7.20 (t, *J* = 7.2 Hz, 1H); Data in accordance with literature.<sup>[2a]</sup>

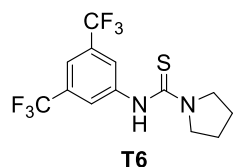

**N-(3,5-Bis(trifluoromethyl)phenyl)pyrrolidine-1-carbthioamide (T6):** 79% yield as a white solid.

<sup>1</sup>H NMR (600 MHz, DMSO-*d*<sub>6</sub>): δ 9.34 (s, 1H), 8.24 (s, 2H), 7.75 (s, 1H), 3.68 (br, 4H), 2.02 (br, 2H), 1.89 (br, 2H);

<sup>13</sup>C NMR (151 MHz, DMSO-*d*<sub>6</sub>): δ 176.68, 142.68, 129.59 (q, *J* = 32.9 Hz), 124.39 (d, *J* = 3.4 Hz), 123.38 (q, *J* = 273.0 Hz), 116.50 (p, *J* = 3.4 Hz), 52.34, 48.67, 25.75, 24.12;

<sup>19</sup>F NMR (565 MHz, DMSO-*d*<sub>6</sub>): δ -61.50;

**HRMS (ESI) m/z:** calculated for C<sub>13</sub>H<sub>14</sub>F<sub>6</sub>N<sub>2</sub>S [M+H]<sup>+</sup>: 343.0704, found: 343.0698.

## SUPPORTING INFORMATION

### 2.1.3 Procedure for the synthesis of thiourea T7<sup>[3]</sup>

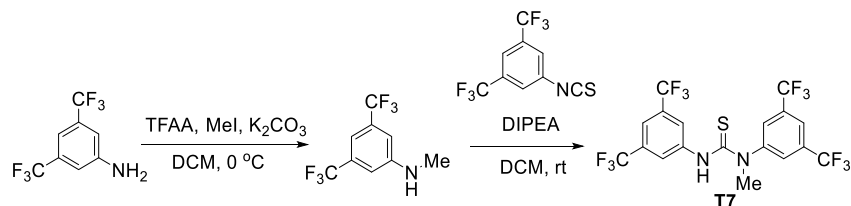

A solution of 3,5-Bis(trifluoromethyl)aniline (1.0 equiv.) in dry DCM (0.5 M) under nitrogen was cooled to 0 °C and stirred. Trifluoroacetic anhydride (3.0 equiv.) was added dropwise. The mixture was allowed to warm to room temperature and stirred for 20 min. The solvent was evaporated and redissolved in Acetone (0.5 M). K<sub>2</sub>CO<sub>3</sub> (2.0 equiv.) and MeI (3.0 equiv.) were added stepwise. The mixture was then warmed to 60 °C and refluxed for 2 h. Upon completion, the mixture was filtered and the filtrate was evaporated. Then, MeOH : H<sub>2</sub>O (5:1, 0.2M) and K<sub>2</sub>CO<sub>3</sub> (1.0 equiv.) were added and the mixture was stirred for another 1 h. After evaporation of MeOH, the mixture was diluted with H<sub>2</sub>O and DCM. The layers were separated and the aqueous layer was extracted with DCM (x2). The combined organic layers were dried over Na<sub>2</sub>SO<sub>4</sub>, filtered and evaporated to give the corresponding 3,5-Bis(trifluoromethyl)-N-methylaniline.

To a solution of 3,5-Bis(trifluoromethyl)-N-methylaniline (1.0 equiv.) and *N,N*-Diisopropylethylamine (1.0 equiv.) in DCM (0.5 M) was added Phenyl isothiocyanate (1.0 equiv.) dropwise at room temperature. The mixture was then stirred overnight. Upon completion, the mixture was diluted with DCM and washed with 1M HCl, H<sub>2</sub>O and brine. The organic layer was dried over Na<sub>2</sub>SO<sub>4</sub>, filtered and evaporated. Purification by column chromatography on silica gel gave the corresponding thiourea.

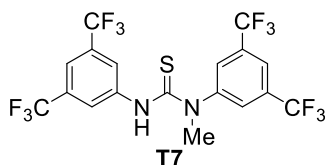

**1,3-Bis(3,5-bis(trifluoromethyl)phenyl)-1-methylthiourea (T7):** 40% yield over 2 steps as a white solid.

<sup>1</sup>H NMR (600 MHz, CDCl<sub>3</sub>): δ 7.90 (s, 1H), 7.80 (s, 2H), 7.75 (s, 2H), 7.67 (s, 1H), 7.05 (br, 1H, NH), 3.77 (s, 3H); Data in accordance with literature.<sup>[3]</sup>

### 2.1.4 Procedure for the synthesis of thiourea T8<sup>[4]</sup>

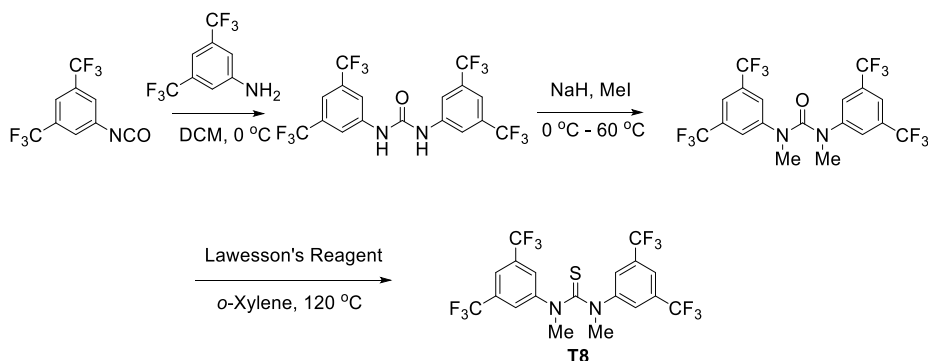

To a solution of *N,N*-Diisopropylethylamine (1.0 equiv.) in Toluene (0.5 M) was added 3,5-Bis(trifluoromethyl)phenyl isocyanate (1.0 equiv.) dropwise at room temperature. Large amounts of white solids appeared after stirred for 1 h. Hexane was added and the mixture was stirred vigorously. Then the solid was filtered and washed with Hexane to give 1,3-Bis(3,5-bis(trifluoromethyl)phenyl)urea.

A solution of 1,3-Bis(3,5-bis(trifluoromethyl)phenyl)urea (1.0 equiv.) in dry THF (0.2 M) under nitrogen was cooled to 0 °C and stirred. NaH (3.0 equiv.) was added portionwise during 30 min. After addition of MeI (3.0 equiv.) dropwise, the mixture was then warmed to 60 °C and refluxed overnight. The reaction was quenched with ice water and diluted with EtOAc. The layers were separated and the aqueous layer was extracted with EtOAc (x2). The combined organic layers were dried over Na<sub>2</sub>SO<sub>4</sub>, filtered and evaporated. Purification by column chromatography on silica gel gave 1,3-Bis(3,5-bis(trifluoromethyl)phenyl)-1,3-dimethylurea.

To a sealed tube was added 1,3-Bis(3,5-bis(trifluoromethyl)phenyl)-1,3-dimethylurea (1.0 equiv.), Lawesson's reagent (2.0 equiv.) and *o*-Xylene (0.2 M). The mixture was then warmed to 120 °C and reacted for 10 h. After cooling, direct purification by column chromatography on silica gel gave 1,3-Bis(3,5-bis(trifluoromethyl)phenyl)-1,3-dimethylthiourea.

## SUPPORTING INFORMATION

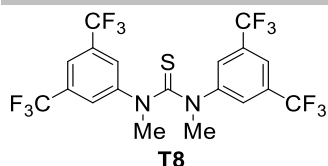

**1,3-Bis(3,5-bis(trifluoromethyl)phenyl)-1,3-dimethylthiourea (T8):** 39% yield over 3 steps as a pale yellow solid.

<sup>1</sup>H NMR (600 MHz, CDCl<sub>3</sub>): δ 7.47 (s, 2H), 7.06 (s, 4H), 3.62 (s, 6H); Data in accordance with literature.<sup>[4]</sup>

### 2.2 General Procedure for the Synthesis of Oxime Esters

#### 2.2.1 General Procedure for the Synthesis of Oxime Esters 1 and 5<sup>[5]</sup>

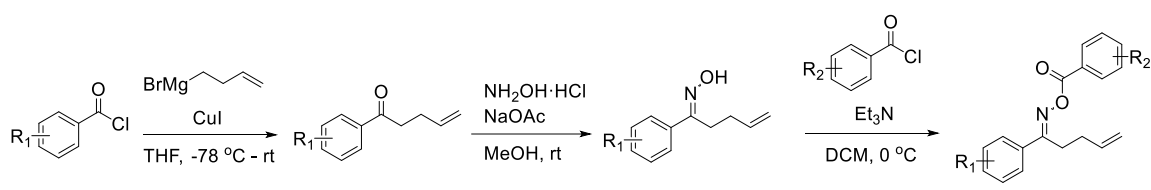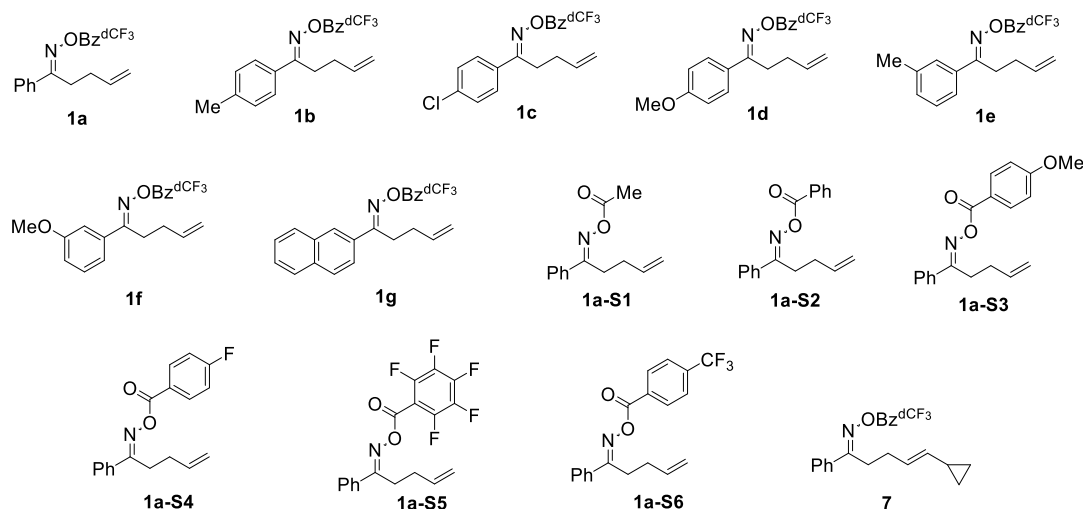

An oven-dried flask was charged with CuI (0.10 equiv.) and then evacuated and refilled with nitrogen (x3). The acid chloride (1.0 equiv.) and dry THF (0.1 M) were added and the mixture was cooled to -78 °C and stirred. A solution of but-3-en-1-ylmagnesium bromide (1.1 equiv., 0.5M in THF) was added dropwise for over 20 min. After stirred at -78 °C for 2 h, the mixture was allowed to warm to room temperature overnight. Saturated NH<sub>4</sub>Cl aqueous solution was added and the mixture was diluted with EtOAc. The layers were separated and the aqueous layer was extracted with EtOAc (x2). The combined organic layers were dried over Na<sub>2</sub>SO<sub>4</sub>, filtered and evaporated. Purification by column chromatography on silica gel gave the corresponding ketone.

To a solution of the ketone (1.0 equiv) in MeOH (1.0 M) was added sodium acetate (2.0 equiv) and hydroxylamine hydrochloride (1.5 equiv.). The mixture was stirred at room temperature and monitored by TLC. Upon completion, the excess MeOH was removed under reduced pressure and the resulting mixture was diluted with H<sub>2</sub>O and EtOAc. The layers were separated and the aqueous layer was extracted with EtOAc (x2). The combined organic layers were dried over Na<sub>2</sub>SO<sub>4</sub>, filtered and evaporated. The corresponding oxime was used directly in the next step without further purification.

To a solution of the corresponding oxime (1.0 equiv.) in DCM (0.5 M) at 0 °C was added Et<sub>3</sub>N (1.5 equiv.) and acyl chloride (1.1 equiv.). The reaction mixture was stirred until the oxime was consumed (determined by TLC, 10 min in most cases). Then saturated NaHCO<sub>3</sub> aqueous solution was added and the mixture was extracted with DCM. The combined organic layers were washed with water and brine, and dried over Na<sub>2</sub>SO<sub>4</sub>. The resulting solution was concentrated under vacuum and the residue was purified by column chromatography on silica gel to afford the corresponding oxime ester. Unless otherwise specified, the major isomer of oxime esters was used for reaction and characterization.

## SUPPORTING INFORMATION

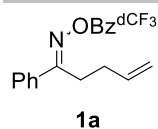

**1-Phenylpent-4-en-1-one O-(3,5-bis(trifluoromethyl)benzoyl) oxime (1a):** 73% yield over 3 steps as a white solid.

**<sup>1</sup>H NMR** (600 MHz, CDCl<sub>3</sub>): δ 8.56 (s, 2H), 8.13 (s, 1H), 7.80 (d, *J* = 7.2 Hz, 2H), 7.51-7.45 (m, 3H), 5.90-5.84 (m, 1H), 5.15-5.07 (m, 2H), 3.08 (t, *J* = 7.8 Hz, 2H), 2.46-2.41 (m, 2H); Data in accordance with literature.<sup>[5b]</sup>

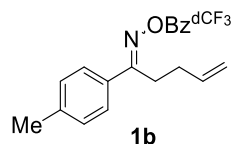

**1-(p-Tolyl)pent-4-en-1-one O-(3,5-bis(trifluoromethyl)benzoyl) oxime (1b):** 78% yield over 3 steps as a white solid.

**<sup>1</sup>H NMR** (600 MHz, CDCl<sub>3</sub>): δ 8.55 (s, 2H), 8.12 (s, 1H), 7.70 (d, *J* = 8.4 Hz, 2H), 7.27 (d, *J* = 8.0 Hz, 2H), 5.92-5.82 (m, 1H), 5.15-5.06 (m, 2H), 3.06 (t, *J* = 7.6 Hz, 2H), 2.45-2.39 (m, 5H); Data in accordance with literature.<sup>[5b]</sup>

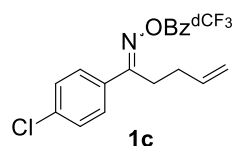

**1-(4-Chlorophenyl)pent-4-en-1-one O-(3,5-bis(trifluoromethyl)benzoyl) oxime (1c):** 79% yield over 3 steps as a white solid.

**<sup>1</sup>H NMR** (600 MHz, CDCl<sub>3</sub>): δ 8.55 (s, 2H), 8.14 (s, 1H), 7.78-7.74 (m, 2H), 7.45-7.42 (m, 2H), 5.91-5.81 (m, 1H), 5.16-5.07 (m, 2H), 3.07 (t, *J* = 7.6 Hz, 2H), 2.45-2.42 (m, 2H); Data in accordance with literature.<sup>[5b]</sup>

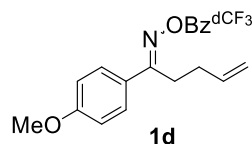

**1-(4-Methoxyphenyl)pent-4-en-1-one O-(3,5-bis(trifluoromethyl)benzoyl) oxime (1d):** 78% yield over 3 steps as a white solid.

**<sup>1</sup>H NMR** (600 MHz, CDCl<sub>3</sub>): δ 8.54 (s, 2H), 8.12 (s, 1H), 7.79-7.77 (m, 2H), 6.97-6.95 (m, 2H), 5.91-5.84 (m, 1H), 5.14-5.06 (m, 2H), 3.86 (s, 3H), 3.04 (t, *J* = 7.8 Hz, 2H), 2.42 (q, *J* = 7.2 Hz, 2H);

**<sup>13</sup>C NMR** (151 MHz, CDCl<sub>3</sub>): δ 167.43, 162.19, 161.40, 136.31, 132.62 (q, *J* = 34.1 Hz), 131.75, 129.79 (q, *J* = 3.8 Hz), 129.19, 126.78 (p, *J* = 3.6 Hz), 125.45, 122.94 (q, *J* = 273.0 Hz), 116.36, 114.37, 55.52, 31.22, 28.31;

**<sup>19</sup>F NMR** (565 MHz, CDCl<sub>3</sub>): δ -63.01;

**HRMS (ESI) m/z:** calculated for C<sub>13</sub>H<sub>9</sub>F<sub>6</sub>NO<sub>3</sub>Na [M+Na]<sup>+</sup>: 468.1010, found: 468.1002.

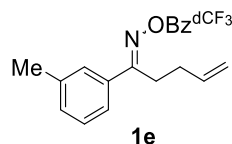

**1-(m-Tolyl)pent-4-en-1-one O-(3,5-bis(trifluoromethyl)benzoyl) oxime (1e):** 70% yield over 3 steps as a white solid.

**<sup>1</sup>H NMR** (600 MHz, CDCl<sub>3</sub>): δ 8.56 (s, 2H), 8.13 (s, 1H), 7.64 (s, 1H), 7.56 (d, *J* = 7.2 Hz, 1H), 7.35 (t, *J* = 7.2 Hz, 1H), 7.31 (d, *J* = 7.2 Hz, 1H), 5.91-5.84 (m, 1H), 5.15-5.07 (m, 2H), 3.07 (t, *J* = 7.8 Hz, 2H), 2.45-2.41 (m, 5H);

**<sup>13</sup>C NMR** (151 MHz, CDCl<sub>3</sub>): δ 168.35, 161.33, 138.80, 136.25, 133.26, 132.63 (q, *J* = 34.1 Hz), 132.06, 131.66, 129.80 (q, *J* = 3.8 Hz), 128.84, 128.13, 126.83 (p, *J* = 3.6 Hz), 124.72, 122.93 (q, *J* = 273.0 Hz), 116.38, 31.06, 28.67, 21.50;

**<sup>19</sup>F NMR** (565 MHz, CDCl<sub>3</sub>): δ -63.02;

**HRMS (ESI) m/z:** calculated for C<sub>21</sub>H<sub>17</sub>F<sub>6</sub>NO<sub>2</sub>Na [M+Na]<sup>+</sup>: 452.1056, found: 452.1051.

## SUPPORTING INFORMATION

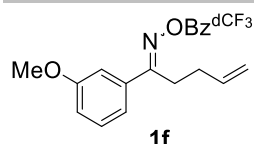

**1-(3-Methoxyphenyl)pent-4-en-1-one O-(3,5-bis(trifluoromethyl)benzoyl) oxime (1f):** 65% yield over 3 steps as a white solid.

**<sup>1</sup>H NMR** (600 MHz, CDCl<sub>3</sub>): δ 8.55 (s, 2H), 8.13 (s, 1H), 7.39-7.34 (m, 3H), 7.05 (d, *J* = 7.8 Hz, 1H), 5.89-5.85 (m, 1H), 5.14-5.07 (m, 2H), 3.87 (s, 3H), 3.06 (t, *J* = 7.8 Hz, 2H), 2.45-2.41 (m, 2H); Data in accordance with literature.<sup>[5b]</sup>

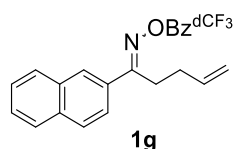

**1-(Naphthalen-2-yl)pent-4-en-1-one O-(3,5-bis(trifluoromethyl)benzoyl) oxime (1g):** 77% yield over 3 steps as a white solid.

**<sup>1</sup>H NMR** (600 MHz, CDCl<sub>3</sub>): δ 8.58 (s, 2H), 8.23 (s, 1H), 8.14 (s, 1H), 7.97 (d, *J* = 8.4 Hz, 2H), 7.95-7.88 (m, 3H), 7.59-7.54 (m, 2H), 5.94-5.89 (m, 1H), 5.17-5.09 (m, 2H), 3.20 (t, *J* = 7.8 Hz, 2H), 2.52-2.48 (m, 2H); Data in accordance with literature.<sup>[5b]</sup>

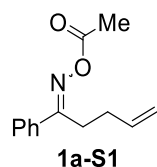

**1-Phenylpent-4-en-1-one O-acetyl oxime (1a-S1):** 70% yield over 3 steps as a yellow oil.

**<sup>1</sup>H NMR** (600 MHz, CDCl<sub>3</sub>): δ 7.71-7.70 (m, 2H), 7.46-7.40 (m, 3H), 5.84-5.80 (m, 1H), 5.07-5.01 (m, 2H), 2.95 (t, *J* = 7.8 Hz, 2H), 2.34-2.30 (m, 2H), 2.27 (s, 3H); Data in accordance with literature.<sup>[5b]</sup>

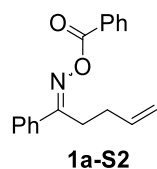

**1-Phenylpent-4-en-1-one O-benzoyl oxime (1a-S2):** 71% yield over 3 steps as a white solid.

**<sup>1</sup>H NMR** (600 MHz, CDCl<sub>3</sub>): δ 8.12 (d, *J* = 7.2 Hz, 2H), 7.79 (d, *J* = 7.2 Hz, 2H), 7.62 (t, *J* = 7.2 Hz, 1H), 7.51 (t, *J* = 7.8 Hz, 2H), 7.48-7.43 (m, 3H), 5.91-5.85 (m, 1H), 5.12-5.04 (m, 2H), 3.08 (t, *J* = 7.8 Hz, 2H), 2.45-2.41 (m, 2H); Data in accordance with literature.<sup>[5b]</sup>

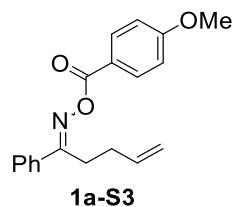

**1-Phenylpent-4-en-1-one O-(4-methoxybenzoyl) oxime (1a-S3):** 72% yield over 3 steps as a white solid.

**<sup>1</sup>H NMR** (600 MHz, CDCl<sub>3</sub>): δ 8.08 (d, *J* = 8.4 Hz, 2H), 7.79 (d, *J* = 7.2 Hz, 2H), 7.48-7.42 (m, 3H), 6.98 (d, *J* = 9.0 Hz, 2H), 5.90-5.85 (m, 1H), 5.12-5.04 (m, 2H), 3.89 (s, 3H), 3.06 (t, *J* = 7.8 Hz, 2H), 2.41-2.44 (m, 2H); Data in accordance with literature.<sup>[5b]</sup>



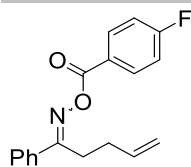**1a-S4**

**1-Phenylpent-4-en-1-one O-(4-fluorobenzoyl) oxime (1a-S4):** 67% yield over 3 steps as a yellow oil.

**<sup>1</sup>H NMR** (600 MHz, CDCl<sub>3</sub>): δ 8.10-8.08 (m, 4H), 7.75 (d, *J* = 8.4 Hz, 2H), 7.41-7.35 (m, 3H), 7.11 (td, *J* = 8.4, 1.8 Hz, 2H), 5.86-5.79 (m, 1H), 5.06-4.98 (m, 2H), 3.01 (t, *J* = 7.8 Hz, 2H), 2.36 (q, *J* = 7.2 Hz, 2H);

**<sup>13</sup>C NMR** (151 MHz, CDCl<sub>3</sub>): δ 166.63, 165.75 (d, *J* = 254.6 Hz), 162.58, 136.28, 133.58, 132.0 (d, *J* = 9.5 Hz), 130.55, 128.53, 127.23, 125.21 (d, *J* = 3.2 Hz), 115.83, 115.69 (d, *J* = 21.9 Hz), 30.65, 27.84;

**<sup>19</sup>F NMR** (565 MHz, CDCl<sub>3</sub>): δ -104.52;

**HRMS (ESI) m/z:** calculated for C<sub>18</sub>H<sub>16</sub>FNO<sub>2</sub>Na [M+Na]<sup>+</sup>: 320.1057, found: 320.1052.

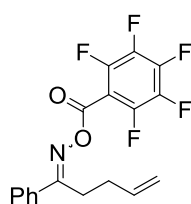**1a-S5**

**1-Phenylpent-4-en-1-one O-perfluorobenzoyl oxime (1a-S5):** 76% yield over 3 steps as a white solid.

**<sup>1</sup>H NMR** (600 MHz, CDCl<sub>3</sub>): δ 7.75-7.74 (m, 2H), 7.51-7.49 (m, 1H), 7.48-7.43 (m, 2H), 5.82-5.78 (m, 1H), 5.06-5.01 (m, 2H), 3.00 (t, *J* = 7.8 Hz, 2H), 2.36-2.32 (m, 2H); Data in accordance with literature.<sup>[5b]</sup>

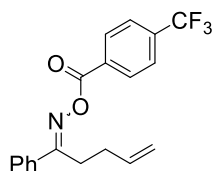**1a-S6**

**1-Phenylpent-4-en-1-one O-(4-(trifluoromethyl)benzoyl) oxime (1a-S6):** 80% yield over 3 steps as a white solid.

**<sup>1</sup>H NMR** (600 MHz, CDCl<sub>3</sub>): δ 8.23 (d, *J* = 7.8 Hz, 2H), 7.82-7.77 (m, 4H), 7.50-7.44 (m, 3H), 5.89-5.85 (m, 1H), 5.12-5.05 (m, 2H), 3.08 (t, *J* = 7.2 Hz, 2H), 2.44-2.41 (m, 2H); Data in accordance with literature.<sup>[5b]</sup>

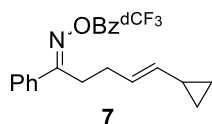**7**

**(4E)-5-Cyclopropyl-1-phenylpent-4-en-1-one O-(3,5-bis(trifluoromethyl)benzoyl) oxime (7):** 68% yield over 3 steps as a pale yellow solid.

**<sup>1</sup>H NMR** (600 MHz, CDCl<sub>3</sub>): δ 8.56 (s, 2H), 8.13 (s, 1H), 7.82-7.78 (m, 2H), 7.51-7.45 (m, 3H), 5.53-5.49 (m, 0.3H, minor), 5.35-5.31 (m, 0.7H, major), 5.07-5.04 (m, 0.3H, minor), 4.82-4.97 (m, 0.7H, major), 3.09 (t, *J* = 7.2 Hz, 1.4H, major), 3.03 (t, *J* = 7.8 Hz, 0.6H, minor), 2.56-2.52 (m, 1.4H, major), 2.37-2.33 (m, 0.6H, minor), 1.37-1.33 (m, 0.7H, major), 1.30-1.28 (m, 0.3H, minor), 0.65-0.61 (m, 2H), 0.28-0.26 (m, 2H).; Data in accordance with literature.<sup>[5b]</sup>

## SUPPORTING INFORMATION

### 2.2.2 General Procedure for the Synthesis of Oxime Esters 4<sup>[6]</sup>

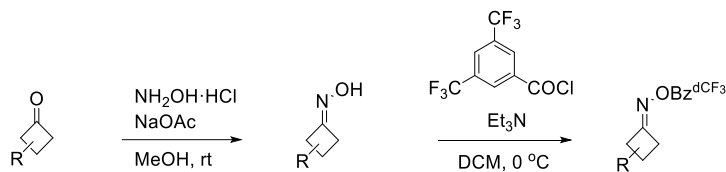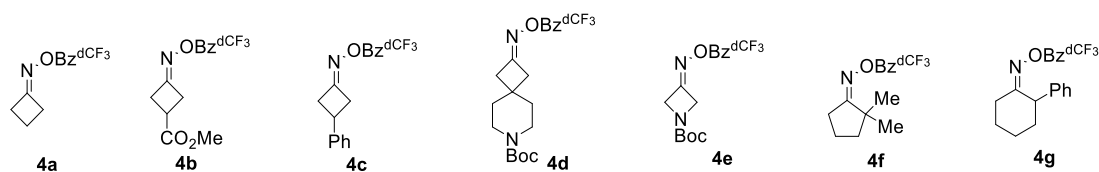

To a solution of cyclobutanone (1.0 equiv) in MeOH (1.0 M) was added sodium acetate (2.0 equiv) and hydroxylamine hydrochloride (1.5 equiv.). The mixture was stirred at room temperature and monitored by TLC. Upon completion, the excess MeOH was removed under reduced pressure and the resulting mixture was diluted with H<sub>2</sub>O and EtOAc. The layers were separated and the aqueous layer was extracted with EtOAc (x2). The combined organic layers were dried over Na<sub>2</sub>SO<sub>4</sub>, filtered and evaporated. The corresponding oxime was used directly in the next step without further purification.

To a solution of the corresponding oxime (1.0 equiv.) in DCM (0.5 M) at 0 °C was added Et<sub>3</sub>N (1.5 equiv.) and 3,5-Bis(trifluoromethyl)benzoyl chloride (1.1 equiv). The reaction mixture was stirred until the oxime was consumed (determined by TLC, 10 min in most cases). Then saturated NaHCO<sub>3</sub> aqueous solution was added and the mixture was extracted with DCM. The combined organic layers were washed with water and brine, and dried over Na<sub>2</sub>SO<sub>4</sub>. The resulting solution was concentrated under vacuum and the residue was purified by column chromatography on silica gel to afford the corresponding oxime ester. Unless otherwise specified, the major isomer of oxime esters was used for reaction and characterization.

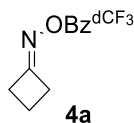

**Cyclobutanone O-(3,5-bis(trifluoromethyl)benzoyl) oxime (4a):** 44% yield over 2 steps as a white solid.

<sup>1</sup>H NMR (600 MHz, CDCl<sub>3</sub>): δ 8.44 (s, 2H), 8.06 (s, 1H), 3.18-3.13 (m, 4H), 2.17-2.11 (m, 2H);

<sup>13</sup>C NMR (151 MHz, CDCl<sub>3</sub>): δ 170.88, 161.55, 132.44 (q, *J* = 34.1 Hz), 131.51, 129.75 (d, *J* = 3.0 Hz), 126.68 (p, *J* = 3.5 Hz), 121.88 (q, *J* = 273.0 Hz), 31.95, 14.30;

<sup>19</sup>F NMR (565 MHz, CDCl<sub>3</sub>): δ -63.11;

**HRMS (ESI) *m/z*:** calculated for C<sub>13</sub>H<sub>9</sub>F<sub>6</sub>NO<sub>2</sub>Na [M+Na]<sup>+</sup>: 348.0430, found: 348.0430.

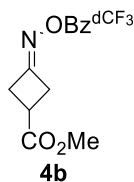

**Methyl 3-(((3,5-bis(trifluoromethyl)benzoyl)oxy)imino)cyclobutane-1-carboxylate (4b):** 76% yield over 2 steps as a white solid.

<sup>1</sup>H NMR (600 MHz, CDCl<sub>3</sub>): δ 8.43 (s, 2H), 8.07 (s, 1H), 3.75 (s, 3H), 3.45-3.39 (m, 4H), 3.32-3.27 (m, 1H);

<sup>13</sup>C NMR (151 MHz, CDCl<sub>3</sub>): δ 173.52, 166.04, 161.27, 132.50 (q, *J* = 34.1 Hz), 131.17, 129.78 (d, *J* = 3.5 Hz), 126.85 (p, *J* = 3.5 Hz), 122.83 (q, *J* = 273.0 Hz), 52.55, 35.80, 35.76, 30.87;

<sup>19</sup>F NMR (565 MHz, CDCl<sub>3</sub>): δ -63.09;

**HRMS (ESI) *m/z*:** calculated for C<sub>15</sub>H<sub>11</sub>F<sub>6</sub>NO<sub>4</sub>Na [M+Na]<sup>+</sup>: 406.0484, found: 406.0479.

## SUPPORTING INFORMATION

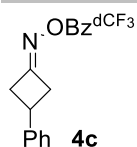

**3-Phenylcyclobutan-1-one O-(3,5-bis(trifluoromethyl)benzoyl) oxime (4c):** 75% yield over 2 steps as a white solid.

**<sup>1</sup>H NMR** (600 MHz, CDCl<sub>3</sub>): δ 8.47 (s, 2H), 8.07 (s, 1H), 7.35 (d, *J* = 7.2 Hz, 2H), 7.29-7.24 (m, 3H), 3.75-3.70 (m, 1H), 3.68-3.62 (m, 1H), 3.61-3.56 (m, 1H), 3.30-3.23 (m, 2H);

**<sup>13</sup>C NMR** (151 MHz, CDCl<sub>3</sub>): δ 167.68, 161.48, 142.72, 132.45 (q, *J* = 34.1 Hz), 131.39, 129.76 (d, *J* = 3.3 Hz), 128.88, 127.13, 126.73 (p, *J* = 3.6 Hz), 126.37, 122.86 (q, *J* = 273.0 Hz), 39.57, 39.51, 32.51;

**<sup>19</sup>F NMR** (565 MHz, CDCl<sub>3</sub>): δ -63.03;

**HRMS (ESI) m/z:** calculated for C<sub>19</sub>H<sub>13</sub>F<sub>6</sub>NO<sub>2</sub>Na [M+Na]<sup>+</sup>: 424.0743, found: 424.0739.

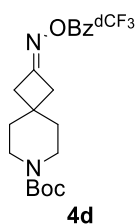

**tert-Butyl 2-(((3,5-bis(trifluoromethyl)benzoyl)oxy)imino)-7-azaspiro[3.5]nonane-7-carboxylate (4d):** 76% yield over 2 steps as a white solid.

**<sup>1</sup>H NMR** (600 MHz, CDCl<sub>3</sub>): δ 8.41 (s, 2H), 8.03 (s, 1H), 3.40-3.33 (m, 4H), 2.89-2.85 (m, 4H), 1.68-1.61 (m, 4H), 1.41 (s, 9H);

**<sup>13</sup>C NMR** (151 MHz, CDCl<sub>3</sub>): δ 166.71, 161.36, 154.79, 132.39 (q, *J* = 34.1 Hz), 131.29, 129.69 (d, *J* = 3.3 Hz), 126.67 (p, *J* = 3.8 Hz), 123.79 (q, *J* = 273.0 Hz), 79.74, 41.93, 41.87, 36.29, 33.45, 28.39;

**<sup>19</sup>F NMR** (565 MHz, CDCl<sub>3</sub>): δ -63.07;

**HRMS (ESI) m/z:** calculated for C<sub>22</sub>H<sub>24</sub>F<sub>6</sub>N<sub>2</sub>O<sub>4</sub>Na [M+Na]<sup>+</sup>: 517.1532, found: 517.1529.

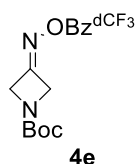

**tert-Butyl 3-(((3,5-bis(trifluoromethyl)benzoyl)oxy)imino)azetidine-1-carboxylate (4e):** 70% yield over 2 steps as a white solid.

**<sup>1</sup>H NMR** (600 MHz, CDCl<sub>3</sub>): δ 8.41 (s, 2H), 8.10 (s, 1H), 4.84-4.80 (m, 4H), 1.47 (s, 9H);

**<sup>13</sup>C NMR** (151 MHz, CDCl<sub>3</sub>): δ 160.91, 160.40, 155.98, 132.70 (q, *J* = 34.1 Hz), 130.55, 129.84 (q, *J* = 3.9 Hz), 127.20 (p, *J* = 3.8 Hz), 122.77 (q, *J* = 273.1 Hz), 81.49, 58.31, 28.31;

**<sup>19</sup>F NMR** (565 MHz, CDCl<sub>3</sub>): δ -63.08;

**HRMS (ESI) m/z:** calculated for C<sub>17</sub>H<sub>16</sub>F<sub>6</sub>N<sub>2</sub>O<sub>4</sub>Na [M+Na]<sup>+</sup>: 449.0906, found: 449.0904.

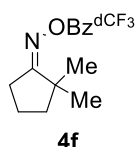

**2,2-Dimethylcyclopentan-1-one O-(3,5-bis(trifluoromethyl)benzoyl) oxime (4f):** 68% yield over 2 steps as a white solid.

**<sup>1</sup>H NMR** (600 MHz, CDCl<sub>3</sub>): δ 8.46 (s, 2H), 8.07 (s, 1H), 2.79 (t, *J* = 7.2 Hz, 2H), 1.87 (p, *J* = 7.2 Hz, 2H), 1.74 (t, *J* = 7.2 Hz, 2H), 1.32 (s, 6H);

**<sup>13</sup>C NMR** (151 MHz, CDCl<sub>3</sub>): δ 182.14, 161.46, 132.45 (q, *J* = 34.1 Hz), 132.00, 129.68 (d, *J* = 3.6 Hz), 126.58 (p, *J* = 3.5 Hz), 122.95 (q, *J* = 273.1 Hz), 43.79, 41.13, 29.22, 26.36, 20.82;

## SUPPORTING INFORMATION

$^{19}\text{F}$  NMR (565 MHz,  $\text{CDCl}_3$ ):  $\delta$  -63.03;

HRMS (ESI)  $m/z$ : calculated for  $\text{C}_{16}\text{H}_{15}\text{F}_6\text{NO}_2\text{Na}$   $[\text{M}+\text{Na}]^+$ : 390.0899, found: 390.0898.

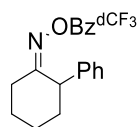

**4g**

**2-Phenylcyclohexan-1-one O-(3,5-bis(trifluoromethyl)benzoyl) oxime (4g)**: 73% yield over 2 steps as a white solid.

$^1\text{H}$  NMR (600 MHz,  $\text{CDCl}_3$ ):  $\delta$  8.51 (s, 2H), 8.10 (s, 1H), 7.40-7.35 (m, 4H), 7.27 (dq,  $J$  = 8.4, 3.2, 2.7 Hz, 1H), 4.03 (t,  $J$  = 5.1 Hz, 1H), 2.97-2.86 (m, 1H), 2.53 (dddq,  $J$  = 13.0, 5.5, 3.8, 1.7 Hz, 1H), 2.37 (ddd,  $J$  = 14.2, 10.5, 5.1 Hz, 1H), 2.15-2.06 (m, 1H), 1.93-1.86 (m, 1H), 1.83 (ddt,  $J$  = 14.6, 7.3, 3.9 Hz, 1H), 1.74 (dtd,  $J$  = 16.6, 9.9, 9.2, 4.2 Hz, 2H);

$^{13}\text{C}$  NMR (151 MHz,  $\text{CDCl}_3$ ):  $\delta$  173.00, 161.86, 138.72, 132.49 (q,  $J$  = 34.1 Hz), 131.86, 129.78 (d,  $J$  = 3.6 Hz), 128.81, 127.81, 127.01, 126.68 (p,  $J$  = 3.6 Hz), 122.94 (q,  $J$  = 273.0 Hz), 45.67, 31.20, 26.53, 25.72, 22.27;

$^{19}\text{F}$  NMR (565 MHz,  $\text{CDCl}_3$ ):  $\delta$  -63.03;

HRMS (ESI)  $m/z$ : calculated for  $\text{C}_{21}\text{H}_{17}\text{F}_6\text{NO}_2\text{Na}$   $[\text{M}+\text{Na}]^+$ : 452.1056, found: 452.1054.

### 2.2.3 General Procedure for the Synthesis of Oxime Esters 17a-17z<sup>[7]</sup>

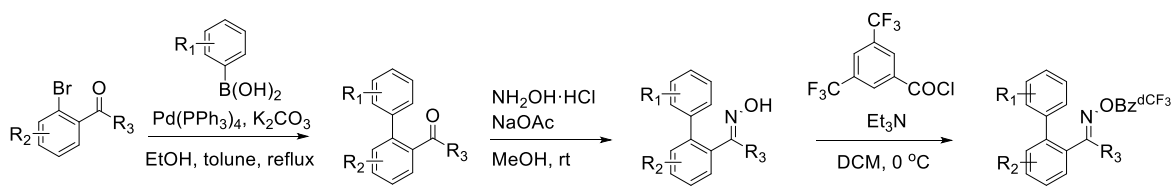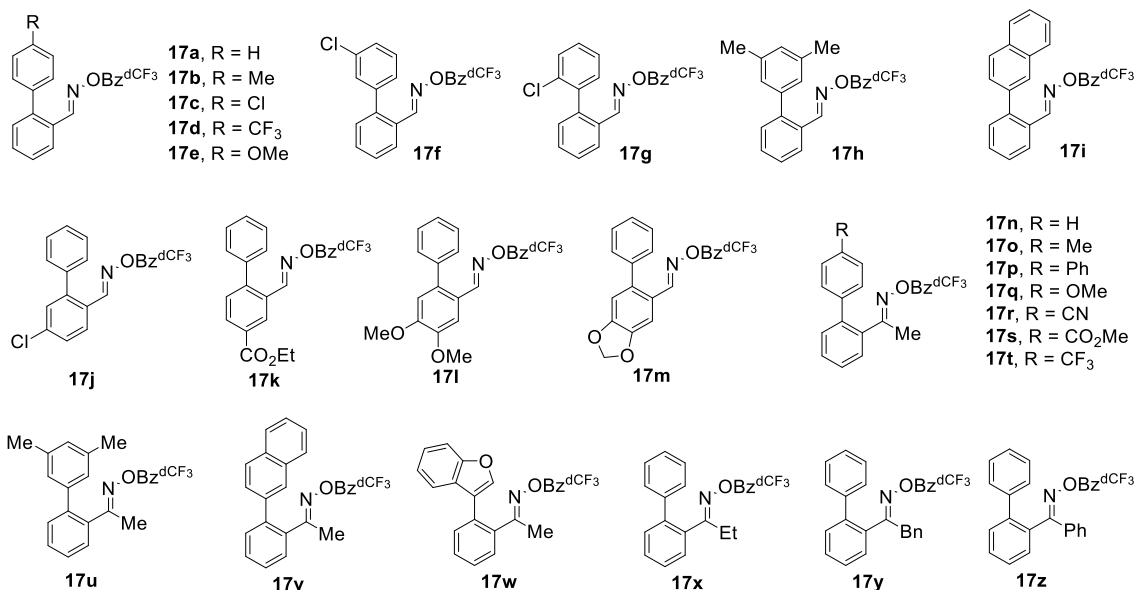

An oven-dried flask was charged with aryl boronic acid (1.2 equiv.),  $\text{Pd}(\text{PPh}_3)_4$  (0.05 equiv.) and  $\text{K}_2\text{CO}_3$  (3.0 equiv.) and then evacuated and refilled with nitrogen (x3). Toluene and EtOH (0.4 M, 4:1) were added and the mixture was stirred at room temperature. Brominated aldehyde or ketone (1.0 equiv.) was added dropwise and then the mixture was allowed to reflux overnight. The mixture was filtered and evaporated. Purification by column chromatography on silica gel gave the corresponding aldehyde or ketone. The corresponding oxime ester was obtained following the previous General Procedures. Unless otherwise specified, the major isomer of oxime esters was used for reaction and characterization.

## SUPPORTING INFORMATION

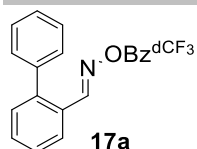

**[1,1'-Biphenyl]-2-carbaldehyde O-(3,5-bis(trifluoromethyl)benzoyl) oxime (17a)**: 58% yield over 3 steps as a white solid.

**<sup>1</sup>H NMR** (600 MHz, CDCl<sub>3</sub>): δ 8.57 (s, 1H), 8.52 (s, 2H), 8.24 (d, *J* = 7.8 Hz, 2H), 8.10 (s, 1H), 7.58 (t, *J* = 7.2 Hz, 1H), 7.52-7.44 (m, 5H), 7.37 (d, *J* = 6.6 Hz, 2H);

**<sup>13</sup>C NMR** (151 MHz, CDCl<sub>3</sub>): δ 161.67, 157.34, 143.89, 139.01, 132.51 (q, *J* = 34.1 Hz), 131.14, 129.96, 128.81, 128.24, 128.07, 127.81, 127.38, 126.88 (p, *J* = 3.5 Hz), 122.93 (q, *J* = 273.0 Hz);

**<sup>19</sup>F NMR** (565 MHz, CDCl<sub>3</sub>): δ -63.03;

**HRMS (ESI) m/z**: calculated for C<sub>22</sub>H<sub>13</sub>F<sub>6</sub>NO<sub>2</sub>Na [M+Na]<sup>+</sup>: 460.0743, found: 460.0736.

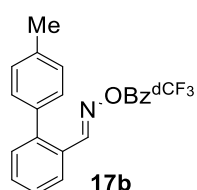

**4'-Methyl-[1,1'-biphenyl]-2-carbaldehyde O-(3,5-bis(trifluoromethyl)benzoyl) oxime (17b)**: 73% yield over 3 steps as a white solid.

**<sup>1</sup>H NMR** (600 MHz, CDCl<sub>3</sub>): δ 8.59 (s, 1H), 8.53 (s, 2H), 8.22 (d, *J* = 7.8 Hz, 2H), 8.11 (s, 1H), 7.57 (t, *J* = 7.2 Hz, 1H), 7.46 (t, *J* = 7.2 Hz, 1H), 7.43 (d, *J* = 7.8 Hz, 1H), 7.32 (d, *J* = 7.8 Hz, 2H), 7.27 (d, *J* = 7.8 Hz, 2H), 2.45 (s, 3H);

**<sup>13</sup>C NMR** (151 MHz, CDCl<sub>3</sub>): δ 161.70, 157.50, 143.91, 138.16, 136.07, 132.51 (q, *J* = 34.1 Hz), 131.92, 131.19, 130.65, 129.00 (d, *J* = 3.2 Hz), 129.86, 129.53, 127.84, 127.81, 127.36, 126.86 (p, *J* = 3.5 Hz), 122.93 (q, *J* = 273.0 Hz);

**<sup>19</sup>F NMR** (565 MHz, CDCl<sub>3</sub>): δ -62.90;

**HRMS (ESI) m/z**: calculated for C<sub>23</sub>H<sub>15</sub>F<sub>6</sub>NO<sub>2</sub>Na [M+Na]<sup>+</sup>: 474.0899, found: 474.0896.

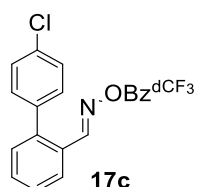

**4'-Chloro-[1,1'-biphenyl]-2-carbaldehyde O-(3,5-bis(trifluoromethyl)benzoyl) oxime (17c)**: 82% yield over 3 steps as a white solid.

**<sup>1</sup>H NMR** (600 MHz, CDCl<sub>3</sub>): δ 8.52 (s, 3H), 8.22 (d, *J* = 7.8 Hz, 2H), 8.11 (s, 1H), 7.58 (d, *J* = 7.2 Hz, 1H), 7.50-7.47 (m, 3H), 7.40 (d, *J* = 7.8 Hz, 1H), 7.30 (d, *J* = 8.4 Hz, 2H);

**<sup>13</sup>C NMR** (151 MHz, CDCl<sub>3</sub>): δ 161.64, 156.95, 142.52, 137.41, 134.60, 132.55 (q, *J* = 34.1 Hz), 132.06, 131.18, 131.03, 130.51, 129.99 (q, *J* = 3.6 Hz), 129.07, 128.42, 128.00, 127.45, 126.95 (p, *J* = 3.5 Hz), 122.92 (q, *J* = 273.0 Hz);

**<sup>19</sup>F NMR** (565 MHz, CDCl<sub>3</sub>): δ -62.90;

**HRMS (ESI) m/z**: calculated for C<sub>22</sub>H<sub>12</sub>ClF<sub>6</sub>NO<sub>2</sub>Na [M+Na]<sup>+</sup>: 494.0353, found: 494.0354.

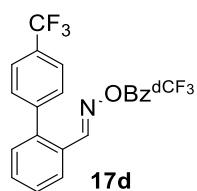

**4-(Trifluoromethyl)-[1,1'-biphenyl]-2-carbaldehyde O-(3,5-bis(trifluoromethyl)benzoyl) oxime (17d)**: 75% yield over 3 steps as a white solid.

**<sup>1</sup>H NMR** (600 MHz, CDCl<sub>3</sub>): δ 8.52 (s, 2H), 8.51 (s, 1H), 8.25 (d, *J* = 7.8 Hz, 2H), 7.77 (d, *J* = 7.8 Hz, 2H), 7.62 (t, *J* = 7.2 Hz, 1H), 7.53 (t, *J* = 7.2 Hz, 1H), 7.50 (d, *J* = 7.8 Hz, 1H), 7.43 (d, *J* = 7.2 Hz, 1H);

## SUPPORTING INFORMATION

**<sup>13</sup>C NMR** (151 MHz, CDCl<sub>3</sub>): δ 161.63, 156.72, 142.66, 142.21, 132.58 (q, *J* = 34.1 Hz), 132.14, 130.98, 130.55, 130.52 (q, *J* = 32.9 Hz), 130.27, 129.99 (q, *J* = 3.9 Hz), 128.84, 128.11, 127.53, 126.99 (p, *J* = 3.5 Hz), 125.82 (q, *J* = 3.5 Hz), 124.17 (q, *J* = 272.8 Hz), 122.91 (q, *J* = 273.2 Hz);

**<sup>19</sup>F NMR** (565 MHz, CDCl<sub>3</sub>): δ -62.57, -62.95;

**HRMS (ESI) m/z**: calculated for C<sub>23</sub>H<sub>12</sub>F<sub>9</sub>NO<sub>2</sub>Na [M+Na]<sup>+</sup>: 528.0617, found: 528.0616.

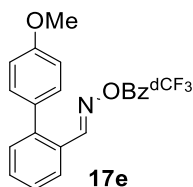

**4'-Methoxy-[1,1'-biphenyl]-2-carbaldehyde O-(3,5-bis(trifluoromethyl)benzoyl) oxime (17e)**: 83% yield over 3 steps as a white solid.

**<sup>1</sup>H NMR** (600 MHz, CDCl<sub>3</sub>): δ 8.58 (s, 1H), 8.53 (s, 2H), 8.20 (d, *J* = 7.8 Hz, 1H), 8.10 (s, 1H), 7.56 (td, *J* = 7.2, 1.0 Hz, 1H), 7.44 (t, *J* = 7.8 Hz, 1H), 7.42 (d, *J* = 7.8 Hz, 1H), 7.29 (d, *J* = 8.4 Hz, 1H), 7.03 (d, *J* = 8.4 Hz, 1H), 3.88 (s, 3H);

**<sup>13</sup>C NMR** (151 MHz, CDCl<sub>3</sub>): δ 161.70, 159.75, 157.56, 142.58, 132.50 (q, *J* = 34.1 Hz), 131.91, 131.28, 131.18, 131.13, 130.63, 129.97 (q, *J* = 3.6 Hz), 128.86, 127.68, 127.38, 126.86 (p, *J* = 3.5 Hz), 122.93 (q, *J* = 273.5 Hz), 114.25, 55.50;

**<sup>19</sup>F NMR** (565 MHz, CDCl<sub>3</sub>): δ -62.90;

**HRMS (ESI) m/z**: calculated for C<sub>23</sub>H<sub>15</sub>F<sub>6</sub>NO<sub>3</sub>Na [M+Na]<sup>+</sup>: 490.0848, found: 490.0847.

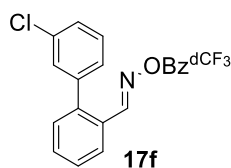

**3'-Chloro-[1,1'-biphenyl]-2-carbaldehyde O-(3,5-bis(trifluoromethyl)benzoyl) oxime (17f)**: 76% yield over 3 steps as a white solid.

**<sup>1</sup>H NMR** (600 MHz, CDCl<sub>3</sub>): δ 8.52 (s, 3H), 8.23 (d, *J* = 7.8 Hz, 1H), 8.10 (s, 1H), 7.59 (t, *J* = 7.2 Hz, 1H), 7.50 (t, *J* = 7.8 Hz, 1H), 7.44-7.38 (m, 4H), 7.24-7.22 (m, 1H);

**<sup>13</sup>C NMR** (151 MHz, CDCl<sub>3</sub>): δ 161.61, 156.76, 142.32, 140.78, 134.86, 132.53 (q, *J* = 34.1 Hz), 132.04, 131.04, 130.50, 130.0, 129.77, 128.59, 128.45, 128.23, 127.89, 127.46, 126.94 (p, *J* = 3.5 Hz), 122.92 (q, *J* = 273.5 Hz);

**<sup>19</sup>F NMR** (565 MHz, CDCl<sub>3</sub>): δ -62.91;

**HRMS (ESI) m/z**: calculated for C<sub>22</sub>H<sub>12</sub>ClF<sub>6</sub>NO<sub>2</sub>Na [M+Na]<sup>+</sup>: 494.0353, found: 494.0352.

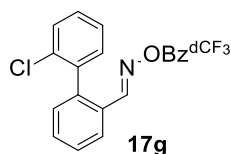

**2'-Chloro-[1,1'-biphenyl]-2-carbaldehyde O-(3,5-bis(trifluoromethyl)benzoyl) oxime (17g)**: 66% yield over 3 steps as a white solid.

**<sup>1</sup>H NMR** (600 MHz, CDCl<sub>3</sub>): δ 8.50 (s, 2H), 8.30 (s, 1H), 8.28 (d, *J* = 7.8 Hz, 1H), 8.09 (s, 1H), 7.59 (t, *J* = 7.2 Hz, 1H), 7.56-7.51 (m, 2H), 7.44-7.38 (m, 2H), 7.34-7.30 (m, 2H);

**<sup>13</sup>C NMR** (151 MHz, CDCl<sub>3</sub>): δ 161.60, 156.31, 141.02, 137.64, 133.54, 132.47 (q, *J* = 34.1 Hz), 131.93, 131.90, 131.08, 130.86, 130.07, 129.98, 128.74, 128.12, 127.17, 127.12, 126.88 (p, *J* = 3.5 Hz), 122.92 (q, *J* = 273.5 Hz);

**<sup>19</sup>F NMR** (565 MHz, CDCl<sub>3</sub>): δ -62.90;

**HRMS (ESI) m/z**: calculated for C<sub>22</sub>H<sub>12</sub>ClF<sub>6</sub>NO<sub>2</sub>Na [M+Na]<sup>+</sup>: 494.0353, found: 494.0355.

## SUPPORTING INFORMATION

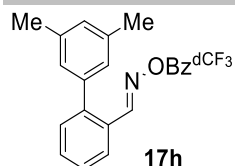

**3',5'-Dimethyl-[1,1'-biphenyl]-2-carbaldehyde O-(3,5-bis(trifluoromethyl)benzoyl) oxime (17h):** 74% yield over 3 steps as a white solid.

**<sup>1</sup>H NMR** (600 MHz, CDCl<sub>3</sub>): δ 8.58 (s, 1H), 8.53 (s, 2H), 8.22 (d, *J* = 7.8 Hz, 1H), 8.11 (s, 1H), 7.56 (t, *J* = 7.8 Hz, 1H), 7.46 (t, *J* = 7.8 Hz, 1H), 7.41 (d, *J* = 7.8 Hz, 1H), 7.10 (s, 1H), 6.98 (s, 2H), 2.40 (s, 6H);

**<sup>13</sup>C NMR** (151 MHz, CDCl<sub>3</sub>): δ 161.70, 157.49, 144.24, 138.98, 138.39, 132.51 (q, *J* = 34.1 Hz), 131.82, 131.21, 130.58, 129.98 (q, *J* = 3.6 Hz), 129.84, 127.85, 127.82, 127.61, 127.32, 126.85 (p, *J* = 3.6 Hz), 122.94 (q, *J* = 273.0 Hz), 21.45;

**<sup>19</sup>F NMR** (565 MHz, CDCl<sub>3</sub>): δ -62.92;

**HRMS (ESI) m/z:** calculated for C<sub>24</sub>H<sub>17</sub>F<sub>6</sub>NO<sub>2</sub>Na [M+Na]<sup>+</sup>: 488.1056, found: 488.1057.

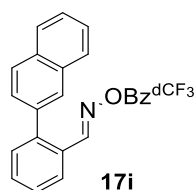

**2-(Naphthalen-2-yl)benzaldehyde O-(3,5-bis(trifluoromethyl)benzoyl) oxime (17i):** 80% yield over 3 steps as a white solid.

**<sup>1</sup>H NMR** (600 MHz, CDCl<sub>3</sub>): δ 8.59 (s, 1H), 8.49 (s, 2H), 8.28 (d, *J* = 7.8 Hz, 1H), 8.08 (s, 1H), 7.98 (d, *J* = 8.4 Hz, 1H), 7.95-7.91 (m, 2H), 7.83 (s, 1H), 7.62 (t, *J* = 7.8 Hz, 1H), 7.59-7.56 (m, 2H), 7.54-7.50 (m, 3H);

**<sup>13</sup>C NMR** (151 MHz, CDCl<sub>3</sub>): δ 161.71, 157.35, 143.89, 136.47, 133.25, 132.85, 132.48 (q, *J* = 34.1 Hz), 131.94, 131.07, 130.86, 129.97 (d, *J* = 4.0 Hz), 129.14, 128.56, 128.33, 128.16, 127.95, 127.84, 127.68, 127.02, 126.84, 122.89 (q, *J* = 273.0 Hz);

**<sup>19</sup>F NMR** (565 MHz, CDCl<sub>3</sub>): δ -62.90;

**HRMS (ESI) m/z:** calculated for C<sub>26</sub>H<sub>15</sub>F<sub>6</sub>NO<sub>2</sub>Na [M+Na]<sup>+</sup>: 510.0899, found: 510.0894.

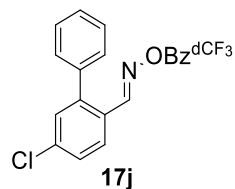

**5-Chloro-[1,1'-biphenyl]-2-carbaldehyde O-(3,5-bis(trifluoromethyl)benzoyl) oxime (17j):** 64% yield over 3 steps as a white solid.

**<sup>1</sup>H NMR** (600 MHz, CDCl<sub>3</sub>): δ 8.50 (s, 2H), 8.49 (s, 1H), 8.18 (d, *J* = 7.8 Hz, 1H), 8.10 (s, 1H), 7.53-7.47 (m, 3H), 7.46-7.44 (m, 2H), 7.35 (d, *J* = 7.2 Hz, 2H);

**<sup>13</sup>C NMR** (151 MHz, CDCl<sub>3</sub>): δ 161.55, 156.30, 145.33, 138.0, 137.68, 132.55 (q, *J* = 34.1 Hz), 130.97, 130.62, 129.98 (d, *J* = 4.0 Hz), 129.76, 129.12, 129.0, 128.78, 128.37, 126.96 (p, *J* = 3.6 Hz), 125.93, 122.89 (q, *J* = 273.0 Hz);

**<sup>19</sup>F NMR** (565 MHz, CDCl<sub>3</sub>): δ -62.92;

**HRMS (ESI) m/z:** calculated for C<sub>22</sub>H<sub>12</sub>ClF<sub>6</sub>NO<sub>2</sub>Na [M+Na]<sup>+</sup>: 494.0353, found: 494.0349.

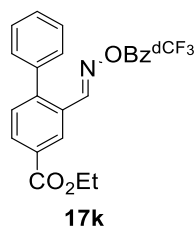

**Ethyl 2-(((3,5-bis(trifluoromethyl)benzoyl)oxy)imino)methyl)-[1,1'-biphenyl]-4-carboxylate (17k):** 66% yield over 3 steps as a white solid.

## SUPPORTING INFORMATION

**<sup>1</sup>H NMR** (600 MHz, CDCl<sub>3</sub>): δ 8.83 (s, 1H), 8.57 (s, 1H), 8.52 (s, 2H), 8.23 (d, *J* = 7.8 Hz, 1H), 8.10 (s, 1H), 7.54-7.48 (m, 4H), 7.38 (d, *J* = 6.6 Hz, 2H), 4.45 (q, *J* = 7.2 Hz, 2H), 1.44 (t, *J* = 7.2 Hz, 3H);

**<sup>13</sup>C NMR** (151 MHz, CDCl<sub>3</sub>): δ 165.75, 161.56, 156.93, 147.62, 138.14, 132.59, 132.55 (q, *J* = 34.1 Hz), 130.99, 130.82, 130.45, 129.98 (d, *J* = 4.0 Hz), 129.76, 129.16, 128.99, 128.85, 127.68, 126.96 (p, *J* = 3.6 Hz), 122.89 (q, *J* = 273.0 Hz), 61.58, 14.49;

**<sup>19</sup>F NMR** (565 MHz, CDCl<sub>3</sub>): δ -62.93;

**HRMS (ESI) *m/z***: calculated for C<sub>24</sub>H<sub>15</sub>F<sub>6</sub>NO<sub>4</sub>Na [M+Na]<sup>+</sup>: 532.0954, found: 532.0952.

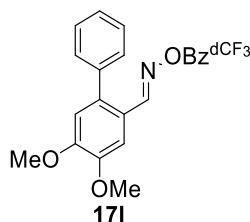

**4,5-Dimethoxy-[1,1'-biphenyl]-2-carbaldehyde O-(3,5-bis(trifluoromethyl)benzoyl) oxime (17l)**: 83% yield over 3 steps as a white solid.

**<sup>1</sup>H NMR** (600 MHz, CDCl<sub>3</sub>): δ 8.50 (s, 2H), 8.46 (s, 1H), 8.08 (s, 1H), 7.69 (s, 1H), 7.49 (t, *J* = 7.2, 1H), 7.45 (t, *J* = 7.2, 1H), 7.35 (d, *J* = 6.6 Hz, 2H), 6.87 (s, 1H), 4.03 (s, 3H), 3.96 (s, 3H);

**<sup>13</sup>C NMR** (151 MHz, CDCl<sub>3</sub>): δ 161.85, 157.12, 152.18, 148.92, 138.91, 138.68, 132.47 (q, *J* = 34.1 Hz), 131.24, 130.05, 129.91 (d, *J* = 3.2 Hz), 128.75, 128.12, 126.80 (p, *J* = 3.6 Hz), 122.91 (q, *J* = 273.0 Hz), 119.57, 112.83, 108.79, 56.44, 56.19;

**<sup>19</sup>F NMR** (565 MHz, CDCl<sub>3</sub>): δ -62.91;

**HRMS (ESI) *m/z***: calculated for C<sub>24</sub>H<sub>17</sub>F<sub>6</sub>NO<sub>4</sub>Na [M+Na]<sup>+</sup>: 520.0954, found: 520.0949.

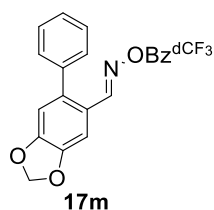

**6-Phenylbenzo[d][1,3]dioxole-5-carbaldehyde O-(3,5-bis(trifluoromethyl)benzoyl) oxime (17m)**: 84% yield over 3 steps as a white solid.

**<sup>1</sup>H NMR** (600 MHz, CDCl<sub>3</sub>): δ 8.49 (s, 2H), 8.41 (s, 1H), 8.08 (s, 1H), 7.69 (s, 1H), 7.49-7.43 (m, 3H), 7.31 (d, *J* = 6.6 Hz, 2H), 6.85 (s, 1H), 6.09 (s, 2H);

**<sup>13</sup>C NMR** (151 MHz, CDCl<sub>3</sub>): δ 161.74, 156.88, 150.99, 147.86, 140.30, 138.82, 132.47 (q, *J* = 34.1 Hz), 131.22, 130.0, 129.94 (d, *J* = 3.2 Hz), 128.78, 128.23, 126.80 (p, *J* = 3.6 Hz), 122.93 (q, *J* = 273.0 Hz), 121.12, 110.37, 106.48, 102.17;

**<sup>19</sup>F NMR** (565 MHz, CDCl<sub>3</sub>): δ -62.91;

**HRMS (ESI) *m/z***: calculated for C<sub>23</sub>H<sub>13</sub>F<sub>6</sub>NO<sub>4</sub>Na [M+Na]<sup>+</sup>: 504.0641, found: 504.0636.

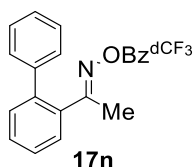

**1-([1,1'-Biphenyl]-2-yl)ethan-1-one O-(3,5-bis(trifluoromethyl)benzoyl) oxime (17n)**: 61% yield over 3 steps as a white solid.

**<sup>1</sup>H NMR** (600 MHz, CDCl<sub>3</sub>): δ 8.54 (s, 2H), 8.11 (s, 1H), 7.60 (d, *J* = 7.8 Hz, 1H), 7.54 (t, *J* = 7.8 Hz, 1H), 7.47-7.42 (m, 6H), 7.39 (t, *J* = 7.2 Hz, 1H), 1.93 (s, 3H);

**<sup>13</sup>C NMR** (151 MHz, CDCl<sub>3</sub>): δ 169.42, 161.35, 140.88, 140.49, 134.70, 132.54 (q, *J* = 34.1 Hz), 131.68, 130.58, 130.41, 129.86, 129.83, 129.11, 128.86, 127.97, 127.70, 126.80 (p, *J* = 3.6 Hz), 122.92 (q, *J* = 273.0 Hz), 18.54;

**<sup>19</sup>F NMR** (565 MHz, CDCl<sub>3</sub>): δ -62.98;

**HRMS (ESI) *m/z***: calculated for C<sub>23</sub>H<sub>15</sub>F<sub>6</sub>NO<sub>2</sub>Na [M+Na]<sup>+</sup>: 474.0899, found: 474.0897.



## SUPPORTING INFORMATION

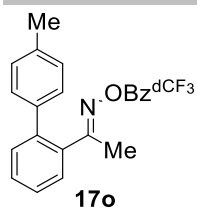

**1-(4'-Methyl-[1,1'-biphenyl]-2-yl)ethan-1-one O-(3,5-bis(trifluoromethyl)benzoyl) oxime (17o):** 64% yield over 3 steps as a white solid.

**<sup>1</sup>H NMR** (600 MHz, CDCl<sub>3</sub>): δ 8.54 (s, 2H), 8.12 (s, 1H), 7.59 (dd, *J* = 7.8, 1.2 Hz, 1H), 7.52 (td, *J* = 7.8, 1.2 Hz, 1H), 7.44-7.40 (m, 2H), 7.35 (d, *J* = 7.8 Hz, 2H), 7.24 (d, *J* = 7.8 Hz, 2H), 2.40 (s, 3H), 1.93 (s, 3H);

**<sup>13</sup>C NMR** (151 MHz, CDCl<sub>3</sub>): δ 169.65, 161.38, 140.87, 137.85, 137.56, 134.63, 132.54 (q, *J* = 34.1 Hz), 131.73, 130.56, 130.39, 129.85, 129.59, 128.98, 127.45, 126.79 (p, *J* = 3.6 Hz), 122.93 (q, *J* = 273.0 Hz), 21.32, 18.57;

**<sup>19</sup>F NMR** (565 MHz, CDCl<sub>3</sub>): δ -62.97;

**HRMS (ESI) m/z:** calculated for C<sub>24</sub>H<sub>17</sub>F<sub>6</sub>NO<sub>2</sub>Na [M+Na]<sup>+</sup>: 488.1056, found: 488.1053.

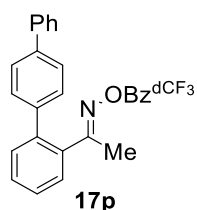

**1-([1,1':4',1''-Terphenyl]-2-yl)ethan-1-one O-(3,5-bis(trifluoromethyl)benzoyl) oxime (17p):** 40% yield over 3 steps as a white solid.

**<sup>1</sup>H NMR** (600 MHz, CDCl<sub>3</sub>): δ 8.55 (s, 2H), 8.11 (s, 1H), 7.69 (d, *J* = 7.8 Hz, 2H), 7.65 (d, *J* = 7.8 Hz, 2H), 7.62 (d, *J* = 7.8 Hz, 1H), 7.58-7.55 (m, 3H), 7.50 (d, *J* = 7.8 Hz, 1H), 7.47-7.44 (m, 3H), 7.37 (t, *J* = 7.8 Hz, 2H), 1.99 (s, 3H);

**<sup>13</sup>C NMR** (151 MHz, CDCl<sub>3</sub>): δ 169.52, 161.39, 140.77, 140.44, 140.40, 139.39, 134.72, 132.57 (q, *J* = 34.1 Hz), 131.67, 130.57, 130.49, 129.95, 129.87 (d, *J* = 3.6 Hz), 129.54, 129.02, 127.77, 127.75, 127.51, 127.17, 126.83 (p, *J* = 3.6 Hz), 122.92 (q, *J* = 273.0 Hz), 18.75;

**<sup>19</sup>F NMR** (565 MHz, CDCl<sub>3</sub>): δ -62.95;

**HRMS (ESI) m/z:** calculated for C<sub>29</sub>H<sub>19</sub>F<sub>6</sub>NO<sub>2</sub>Na [M+Na]<sup>+</sup>: 550.1212, found: 550.1209.

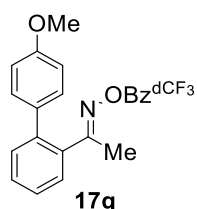

**1-(4'-Methoxy-[1,1'-biphenyl]-2-yl)ethan-1-one O-(3,5-bis(trifluoromethyl)benzoyl) oxime (17q):** 68% yield over 3 steps as a white solid.

**<sup>1</sup>H NMR** (600 MHz, CDCl<sub>3</sub>): δ 8.54 (s, 2H), 8.11 (s, 1H), 7.57 (dd, *J* = 7.8, 1.2 Hz, 1H), 7.51 (td, *J* = 7.8, 1.2 Hz, 1H), 7.43-7.37 (m, 4H), 6.98-6.95 (m, 2H), 3.58 (s, 3H), 1.94 (s, 3H);

**<sup>13</sup>C NMR** (151 MHz, CDCl<sub>3</sub>): δ 169.72, 161.40, 159.59, 140.52, 134.59, 132.81, 132.56 (q, *J* = 34.1 Hz), 131.72, 130.49, 130.40, 130.25, 129.85, 127.28, 126.80 (p, *J* = 3.6 Hz), 122.93 (q, *J* = 273.0 Hz), 114.32, 55.42, 18.53;

**<sup>19</sup>F NMR** (565 MHz, CDCl<sub>3</sub>): δ -62.97;

**HRMS (ESI) m/z:** calculated for C<sub>24</sub>H<sub>17</sub>F<sub>6</sub>NO<sub>3</sub>Na [M+Na]<sup>+</sup>: 504.1005, found: 504.1006.

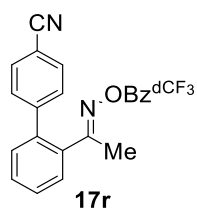

## SUPPORTING INFORMATION

**2'-(1-(((3,5-Bis(trifluoromethyl)benzoyl)oxy)imino)ethyl)-[1,1'-biphenyl]-4-carbonitrile (17r)**: 68% yield over 3 steps as a white solid.

**<sup>1</sup>H NMR** (600 MHz, CDCl<sub>3</sub>): δ 8.52 (s, 2H), 8.12 (s, 1H), 7.73 (d, *J* = 7.8 Hz, 2H), 7.61-7.56 (m, 4H), 7.50 (t, *J* = 7.8 Hz, 1H), 7.42 (d, *J* = 7.8 Hz, 1H), 1.99 (s, 3H);

**<sup>13</sup>C NMR** (151 MHz, CDCl<sub>3</sub>): δ 168.27, 161.21, 145.14, 138.77, 134.69, 132.62, 132.58 (q, *J* = 34.1 Hz), 131.32, 130.64, 130.41, 130.03, 129.83, 128.88, 126.98 (p, *J* = 3.6 Hz), 122.85 (q, *J* = 273.0 Hz), 118.65, 111.87, 18.82;

**<sup>19</sup>F NMR** (565 MHz, CDCl<sub>3</sub>): δ -62.96;

**HRMS (ESI) m/z**: calculated for C<sub>24</sub>H<sub>14</sub>F<sub>6</sub>N<sub>2</sub>O<sub>2</sub>Na [M+Na]<sup>+</sup>: 499.0852, found: 499.0848.

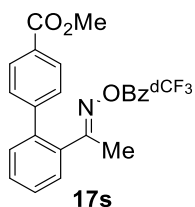

**Methyl 2'-(1-(((3,5-bis(trifluoromethyl)benzoyl)oxy)imino)ethyl)-[1,1'-biphenyl]-4-carboxylate (17s)**: 56% yield over 3 steps as a white solid.

**<sup>1</sup>H NMR** (600 MHz, CDCl<sub>3</sub>): δ 8.54 (s, 2H), 8.11 (s, 1H), 7.58 (dd, *J* = 7.8, 1.2 Hz, 1H), 7.51 (td, *J* = 7.8, 1.2 Hz, 1H), 7.43-7.38 (m, 4H), 6.98-6.95 (m, 2H), 3.85 (s, 3H), 1.94 (s, 3H);

**<sup>13</sup>C NMR** (151 MHz, CDCl<sub>3</sub>): δ 169.71, 161.39, 159.59, 140.52, 134.58, 132.81, 132.55 (q, *J* = 34.1 Hz), 131.72, 130.48, 130.40, 130.24, 129.85, 127.28, 126.79 (p, *J* = 3.6 Hz), 122.93 (q, *J* = 273.0 Hz), 114.31, 55.42, 18.53;

**<sup>19</sup>F NMR** (565 MHz, CDCl<sub>3</sub>): δ -62.97;

**HRMS (ESI) m/z**: calculated for C<sub>25</sub>H<sub>17</sub>F<sub>6</sub>NO<sub>4</sub>Na [M+Na]<sup>+</sup>: 532.0954, found: 532.0954.

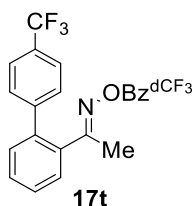

**1-(4'-(Trifluoromethyl)-[1,1'-biphenyl]-2-yl)ethan-1-one O-(3,5-bis(trifluoromethyl)benzoyl) oxime (17t)**: 60% yield over 3 steps as a white solid.

**<sup>1</sup>H NMR** (600 MHz, CDCl<sub>3</sub>): δ 8.53 (s, 2H), 8.12 (s, 1H), 7.70 (d, *J* = 7.8 Hz, 2H), 7.62-7.60 (m, 3H), 7.57 (td, *J* = 7.8, 1.2 Hz, 1H), 7.49 (td, *J* = 7.8, 1.2 Hz, 1H), 7.44 (dd, *J* = 7.8, 1.2 Hz, 1H), 1.96 (s, 3H);

**<sup>13</sup>C NMR** (151 MHz, CDCl<sub>3</sub>): δ 168.73, 161.32, 144.11, 139.28, 134.80, 132.62 (q, *J* = 34.1 Hz), 131.50, 130.60, 130.57, 130.51, 130.19 (q, *J* = 34.1 Hz), 130.03, 129.87 (d, *J* = 3.6 Hz), 129.48, 128.54, 126.92 (p, *J* = 3.6 Hz), 125.83 (q, *J* = 3.9 Hz), 124.22 (q, *J* = 273.0 Hz), 122.91 (q, *J* = 273.0 Hz), 18.78;

**<sup>19</sup>F NMR** (565 MHz, CDCl<sub>3</sub>): δ -62.53, -63.00;

**HRMS (ESI) m/z**: calculated for C<sub>24</sub>H<sub>14</sub>F<sub>9</sub>NO<sub>2</sub>Na [M+Na]<sup>+</sup>: 542.0773, found: 542.0774.

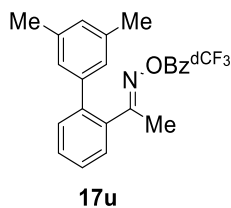

**1-(3',5'-Dimethyl-[1,1'-biphenyl]-2-yl)ethan-1-one O-(3,5-bis(trifluoromethyl)benzoyl) oxime (17u)**: 65% yield over 3 steps as a white solid.

**<sup>1</sup>H NMR** (600 MHz, CDCl<sub>3</sub>): δ 8.55 (s, 2H), 8.12 (s, 1H), 7.59 (d, *J* = 7.8 Hz, 2H), 7.51 (td, *J* = 7.8, 1.2 Hz, 1H), 7.44-7.40 (m, 2H), 7.09 (s, 2H), 7.03 (s, 1H), 2.35 (s, 6H), 1.93 (s, 3H);

## SUPPORTING INFORMATION

**<sup>13</sup>C NMR** (151 MHz, CDCl<sub>3</sub>): δ 169.79, 161.37, 141.16, 140.40, 138.35, 134.58, 132.56 (q, *J* = 34.1 Hz), 131.74, 130.50, 130.28, 129.82 (d, *J* = 3.6 Hz), 129.68, 129.54, 127.45, 127.01, 126.77 (p, *J* = 3.6 Hz), 122.93 (q, *J* = 273.0 Hz), 21.38, 18.54;

**<sup>19</sup>F NMR** (565 MHz, CDCl<sub>3</sub>): δ -62.99;

**HRMS (ESI) *m/z***: calculated for C<sub>25</sub>H<sub>19</sub>F<sub>6</sub>NO<sub>2</sub>Na [M+Na]<sup>+</sup>: 502.1212, found: 502.1205.

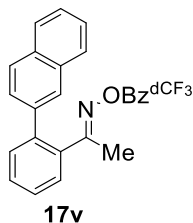

**1-(2-(Naphthalen-2-yl)phenyl)ethan-1-one O-(3,5-bis(trifluoromethyl)benzoyl) oxime (17v)**: 53% yield over 3 steps as a white solid.

**<sup>1</sup>H NMR** (600 MHz, CDCl<sub>3</sub>): δ 8.53 (s, 2H), 8.10 (s, 1H), 7.96 (s, 1H), 7.93-7.89 (m, 3H), 7.65 (d, *J* = 7.2 Hz, 1H), 7.62-7.52 (m, 5H), 7.48 (t, *J* = 7.2 Hz, 1H), 1.91 (s, 3H);

**<sup>13</sup>C NMR** (151 MHz, CDCl<sub>3</sub>): δ 169.60, 161.41, 140.78, 137.89, 134.96, 133.46, 132.78, 132.55 (q, *J* = 34.1 Hz), 131.64, 130.89, 130.46, 129.92, 129.85 (d, *J* = 3.6 Hz), 128.60, 128.39, 128.29, 127.86, 127.79, 127.02, 126.80 (p, *J* = 3.6 Hz), 126.74, 126.63, 125.62, 122.91 (q, *J* = 273.0 Hz), 18.71;

**<sup>19</sup>F NMR** (565 MHz, CDCl<sub>3</sub>): δ -62.96;

**HRMS (ESI) *m/z***: calculated for C<sub>27</sub>H<sub>17</sub>F<sub>6</sub>NO<sub>2</sub>Na [M+Na]<sup>+</sup>: 524.1056, found: 524.1064.

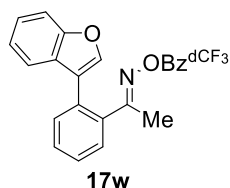

**(2-(Benzofuran-3-yl)phenyl)(phenyl)methanone O-(3,5-bis(trifluoromethyl)benzoyl) oxime (17w)**: 60% yield over 3 steps as a white solid.

**<sup>1</sup>H NMR** (600 MHz, CDCl<sub>3</sub>): δ 8.53 (s, 2H), 8.12 (s, 1H), 7.79 (s, 1H), 7.67 (d, *J* = 7.8 Hz, 2H), 7.64-7.62 (m, 2H), 7.59 (td, *J* = 7.8, 1.2 Hz, 1H), 7.56 (d, *J* = 8.4 Hz, 1H), 7.49 (td, *J* = 7.8, 1.2 Hz, 1H), 7.37 (td, *J* = 7.8, 1.2 Hz, 1H), 7.30 (t, *J* = 7.8 Hz, 1H), 2.09 (s, 3H);

**<sup>13</sup>C NMR** (151 MHz, CDCl<sub>3</sub>): δ 169.14, 161.40, 155.40, 143.55, 135.44, 132.59 (q, *J* = 34.1 Hz), 131.54, 130.68, 130.41, 130.26, 129.87 (d, *J* = 3.6 Hz), 129.82, 128.15, 127.00, 126.88 (p, *J* = 3.6 Hz), 125.14, 123.43, 122.92 (q, *J* = 273.0 Hz), 120.47, 120.22, 111.92, 18.49;

**<sup>19</sup>F NMR** (565 MHz, CDCl<sub>3</sub>): δ -62.97;

**HRMS (ESI) *m/z***: calculated for C<sub>25</sub>H<sub>15</sub>F<sub>6</sub>NO<sub>3</sub>Na [M+Na]<sup>+</sup>: 514.0848, found: 514.0848.

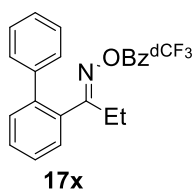

**1-([1,1'-Biphenyl]-2-yl)propan-1-one O-(3,5-bis(trifluoromethyl)benzoyl) oxime (17x)**: 51% yield over 3 steps as a white solid.

**<sup>1</sup>H NMR** (600 MHz, CDCl<sub>3</sub>): δ 8.53 (s, 2H), 8.12 (s, 1H), 7.55-7.52 (m, 4H), 7.46-7.41 (m, 4H), 7.37 (t, *J* = 7.8 Hz, 1H), 2.29 (q, *J* = 7.8 Hz, 2H), 0.90 (t, *J* = 7.8 Hz, 3H);

**<sup>13</sup>C NMR** (151 MHz, CDCl<sub>3</sub>): δ 174.44, 161.48, 140.63, 140.40, 133.27, 132.56 (q, *J* = 34.1 Hz), 131.74, 130.50, 130.44, 130.32, 129.82 (q, *J* = 3.6 Hz), 129.19, 128.81, 127.90, 127.59, 126.79 (p, *J* = 3.6 Hz), 122.93 (q, *J* = 273.0 Hz), 25.13, 10.45;

**<sup>19</sup>F NMR** (565 MHz, CDCl<sub>3</sub>): δ -63.01;

**HRMS (ESI) *m/z***: calculated for C<sub>25</sub>H<sub>19</sub>F<sub>6</sub>NO<sub>2</sub>Na [M+Na]<sup>+</sup>: 488.1056, found: 488.1050.

## SUPPORTING INFORMATION

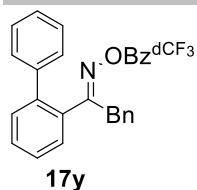

**1-([1,1'-Biphenyl]-2-yl)-2-phenylethan-1-one O-(3,5-bis(trifluoromethyl)benzoyl) oxime (17y):** 63% yield over 3 steps as a white solid.

**<sup>1</sup>H NMR** (600 MHz, CDCl<sub>3</sub>): δ 8.29 (s, 2H), 7.96 (s, 1H), 7.43-7.38 (m, 4H), 7.34 (t, *J* = 7.8 Hz, 3H), 7.28 (t, *J* = 7.8 Hz, 1H), 7.06 (t, *J* = 7.8 Hz, 2H), 7.01 (t, *J* = 7.8 Hz, 1H), 7.81 (d, *J* = 7.8 Hz, 2H), 3.47 (s, 2H);

**<sup>13</sup>C NMR** (151 MHz, CDCl<sub>3</sub>): δ 170.72, 161.43, 140.75, 140.43, 135.06, 133.83, 132.47 (q, *J* = 34.1 Hz), 131.47, 130.91, 130.55, 130.48, 129.90 (q, *J* = 3.6 Hz), 129.22, 128.98, 128.83, 128.31, 128.06, 127.69, 127.00, 126.75 (p, *J* = 3.6 Hz), 122.88 (q, *J* = 273.0 Hz), 37.97;

**<sup>19</sup>F NMR** (565 MHz, CDCl<sub>3</sub>): δ -62.89;

**HRMS (ESI) *m/z***: calculated for C<sub>29</sub>H<sub>19</sub>F<sub>6</sub>NO<sub>2</sub>Na [M+Na]<sup>+</sup>: 550.1212, found: 550.1205.

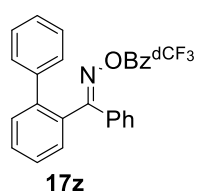

**[1,1'-Biphenyl]-2-yl(phenyl)methanone O-(3,5-bis(trifluoromethyl)benzoyl) oxime (17z):** 43% yield over 3 steps as a white solid.

**<sup>1</sup>H NMR** (600 MHz, CDCl<sub>3</sub>): δ 8.12 (s, 2H), 8.04 (s, 1H), 7.70 (dd, *J* = 8.4, 1.2 Hz, 2H), 7.64 (td, *J* = 7.8, 1.2 Hz, 1H), 7.60 (dd, *J* = 7.8, 1.2 Hz, 1H), 7.53 (td, *J* = 7.8, 1.2 Hz, 1H), 7.47-7.43 (m, 1H), 7.36 (ddd, *J* = 7.8, 4.6, 3.2 Hz, 3H), 7.22-7.14 (m, 5H);

**<sup>13</sup>C NMR** (151 MHz, CDCl<sub>3</sub>): δ 167.26, 160.64, 141.08, 139.78, 133.98, 132.30 (q, *J* = 34.1 Hz), 131.53, 131.48, 131.29, 130.17, 129.79 (q, *J* = 3.6 Hz), 128.85, 128.65, 128.52, 128.17, 127.93, 127.34, 126.61 (p, *J* = 3.6 Hz), 122.87 (q, *J* = 273.0 Hz);

**<sup>19</sup>F NMR** (565 MHz, CDCl<sub>3</sub>): δ -63.05;

**HRMS (ESI) *m/z***: calculated for C<sub>28</sub>H<sub>17</sub>F<sub>6</sub>NO<sub>2</sub>Na [M+Na]<sup>+</sup>: 536.1056, found: 536.1055.

## SUPPORTING INFORMATION

### 2.2.4 General Procedure for the Synthesis of Oxime Esters 17A-17B<sup>[7]</sup>

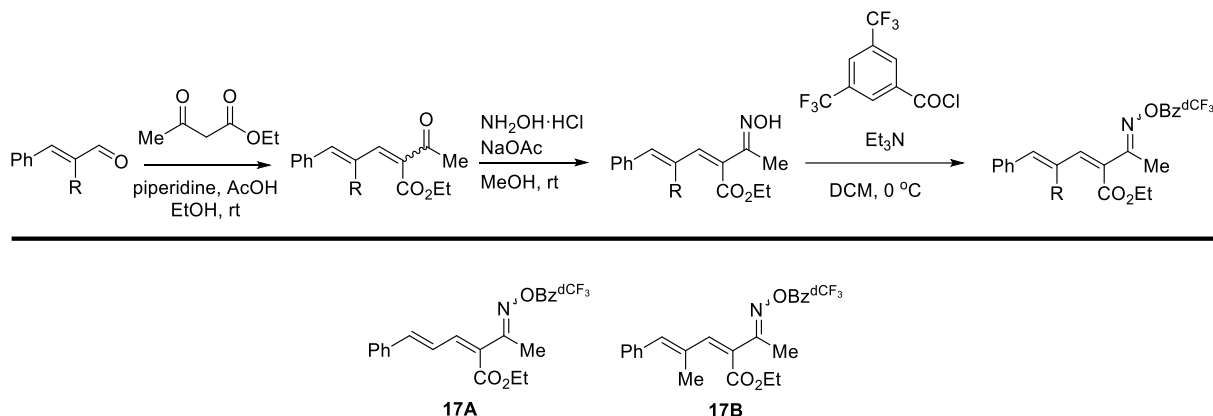

To a solution of cinnamaldehyde (1.0 equiv) in EtOH (0.5 M) was added Ethyl acetoacetate (1.1 equiv), Piperidine (0.5 equiv.) and AcOH (0.5 equiv.). The mixture was stirred at room temperature and monitored by TLC. Upon completion, the excess EtOH was removed under reduced pressure and the resulting mixture was diluted with H<sub>2</sub>O and EtOAc. The layers were separated and the aqueous layer was extracted with EtOAc (x2). The combined organic layers were dried over Na<sub>2</sub>SO<sub>4</sub>, filtered and evaporated. Purification by column chromatography on silica gel gave the corresponding ketone. The corresponding oxime ester was obtained following the previous General Procedures. Unless otherwise specified, the major isomer of oxime esters was used for reaction and characterization.

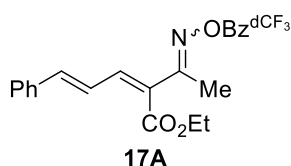

**Ethyl (2Z,4E)-2-(1-(((3,5-bis(trifluoromethyl)benzoyl)oxy)imino)ethyl)-5-phenylpenta-2,4-dienoate (17A):** 34% yield over 3 steps as a white solid.

**<sup>1</sup>H NMR** (600 MHz, CDCl<sub>3</sub>): δ 8.53 (s, 2H), 8.12 (s, 1H), 7.80 (dd, *J* = 15.6, 11.5 Hz, 1H), 7.53 (dt, *J* = 6.4, 1.4 Hz, 2H), 7.41-7.32 (m, 3H), 7.17 (dd, *J* = 11.5, 0.9 Hz, 1H), 7.03 (d, *J* = 15.5 Hz, 1H), 4.37 (q, *J* = 7.1 Hz, 2H), 2.35 (s, 3H), 1.40 (t, *J* = 7.1 Hz, 3H);

**<sup>13</sup>C NMR** (151 MHz, CDCl<sub>3</sub>): δ 165.83, 165.00, 161.09, 144.56, 144.20, 136.02, 132.50 (q, *J* = 34.1 Hz), 131.52, 129.74 (q, *J* = 3.6 Hz), 129.70, 128.92, 127.81, 126.79 (p, *J* = 3.6 Hz), 126.36, 124.23, 123.77 (q, *J* = 273.1 Hz), 61.33, 16.44, 14.28;

**<sup>19</sup>F NMR** (565 MHz, CDCl<sub>3</sub>): δ -62.96;

**HRMS (ESI) *m/z***: calculated for C<sub>24</sub>H<sub>19</sub>F<sub>6</sub>NO<sub>4</sub>Na [M+Na]<sup>+</sup>: 522.1110, found: 522.1108.

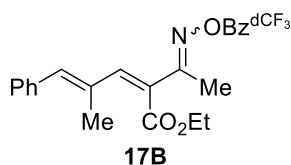

**Ethyl (2Z,4E)-2-(1-(((3,5-bis(trifluoromethyl)benzoyl)oxy)imino)ethyl)-4-methyl-5-phenylpenta-2,4-dienoate (17B):** 36% yield over 3 steps as a white solid.

**<sup>1</sup>H NMR** (600 MHz, Acetone-*d*<sub>6</sub>): δ 8.62 (s, 2H), 8.40 (s, 1H), 7.41 (m, 4H), 7.32 (m, 1H), 7.10 (s, 1H), 7.02 (s, 1H), 4.34 (q, *J* = 7.2 Hz, 2H), 2.44 (s, 3H), 2.09 (s, 3H), 1.37 (t, *J* = 7.2 Hz, 3H);

**<sup>13</sup>C NMR** (151 MHz, Acetone-*d*<sub>6</sub>): δ 167.78, 165.01, 161.16, 141.89, 139.87, 137.54, 134.62, 132.81, 132.80 (q, *J* = 34.0 Hz), 130.68 (q, *J* = 3.6 Hz), 130.60, 130.39, 129.28, 128.73, 127.74 (p, *J* = 3.5 Hz), 124.54 (q, *J* = 272.0 Hz), 61.94, 15.54, 14.37, 12.78;

**<sup>19</sup>F NMR** (565 MHz, Acetone-*d*<sub>6</sub>): δ -63.46;

**HRMS (ESI) *m/z***: calculated for C<sub>25</sub>H<sub>21</sub>F<sub>6</sub>NO<sub>4</sub>Na [M+Na]<sup>+</sup>: 536.1267, found: 536.1264.

2.2.5 General Procedure for the Synthesis of Oxime Esters 17C-17F<sup>[7]</sup>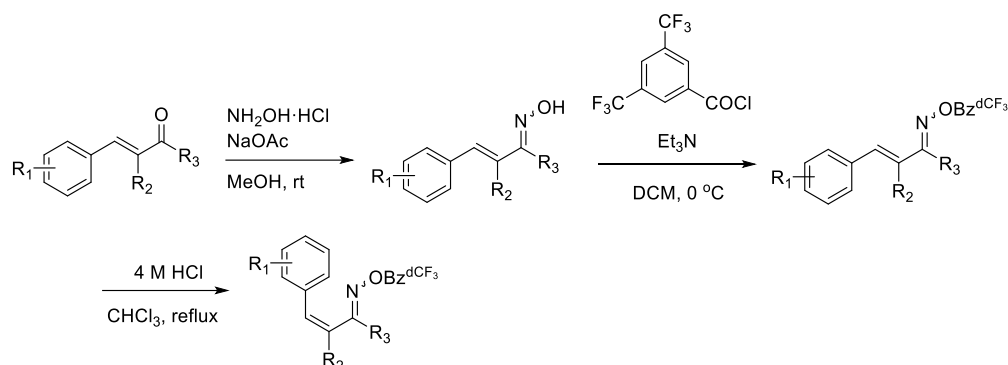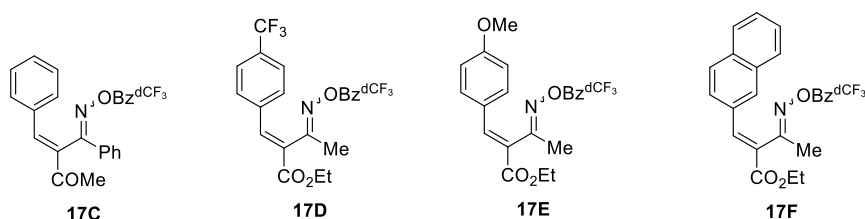

To a solution of alkenyl ketone (1.0 equiv) in MeOH (1.0 M) was added sodium acetate (2.0 equiv) and hydroxylamine hydrochloride (1.5 equiv.). The mixture was stirred at room temperature and monitored by TLC. Upon completion, the excess MeOH was removed under reduced pressure and the resulting mixture was diluted with H<sub>2</sub>O and EtOAc. The layers were separated and the aqueous layer was extracted with EtOAc (x2). The combined organic layers were dried over Na<sub>2</sub>SO<sub>4</sub>, filtered and evaporated. The corresponding oxime was used directly in the next step without further purification.

To a solution of the corresponding oxime (1.0 equiv.) in DCM (0.5 M) at 0 °C was added Et<sub>3</sub>N (1.5 equiv.) and 3,5-Bis(trifluoromethyl)benzoyl chloride (1.1 equiv). The reaction mixture was stirred until the oxime was consumed (determined by TLC, 10 min in most cases). Then saturated NaHCO<sub>3</sub> aqueous solution was added and the mixture was extracted with DCM. The combined organic layers were washed with water and brine, and dried over Na<sub>2</sub>SO<sub>4</sub>. The resulting solution was concentrated under vacuum and the residue was purified by column chromatography on silica gel to afford the corresponding *Z*-configuration oxime ester.

The *Z*-configuration oxime ester was then dissolved in CHCl<sub>3</sub> (1.0 M). 4.0 M HCl (1.0 mL) was added to the mixture and stirred under reflux overnight. Then saturated NaHCO<sub>3</sub> aqueous solution was added and the mixture was extracted with DCM. The combined organic layers were washed with water and brine, and dried over Na<sub>2</sub>SO<sub>4</sub>. The resulting solution was concentrated under vacuum and the residue was purified by column chromatography on silica gel to afford the corresponding oxime ester.

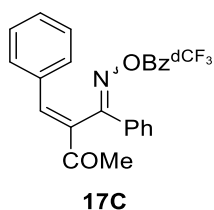

**(3E)-3-(((3,5-Bis(trifluoromethyl)benzoyl)oxy)imino)(phenyl)methyl-4-phenylbut-3-en-2-one (17C):** 38% yield over 4 steps as a white solid.

**<sup>1</sup>H NMR** (600 MHz, Acetone-*d*<sub>6</sub>): δ 8.56 (s, 2H), 8.38 (s, 1H), 7.99 (d, *J* = 7.3 Hz, 2H), 7.65 (s, 1H), 7.59 (t, *J* = 7.4 Hz, 1H), 7.48 (t, *J* = 7.7 Hz, 2H), 7.42 (dd, *J* = 6.8, 3.0 Hz, 2H), 7.30 – 7.25 (m, 3H), 2.62 (s, 3H);

**<sup>13</sup>C NMR** (151 MHz, Acetone-*d*<sub>6</sub>): δ 196.70, 166.77, 160.99, 137.70, 137.66, 135.16, 134.46, 132.75 (q, *J* = 34.1 Hz), 132.68, 130.64 (q, *J* = 3.8 Hz), 130.47, 130.26, 129.94, 129.69, 129.50, 127.71 (p, *J* = 3.6 Hz), 122.87 (q, *J* = 272.0 Hz), 12.80;

**<sup>19</sup>F NMR** (565 MHz, Acetone-*d*<sub>6</sub>): δ -58.25;

**HRMS (ESI) *m/z***: calculated for C<sub>26</sub>H<sub>17</sub>F<sub>6</sub>NO<sub>3</sub>Na [M+Na]<sup>+</sup>: 528.1005, found: 528.1002.

## SUPPORTING INFORMATION

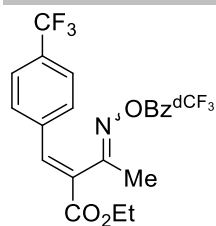

**17D**

**Ethyl 3-(((3,5-bis(trifluoromethyl)benzoyl)oxy)imino)-2-((E)-4-(trifluoromethyl)benzylidene)butanoate (17D):** 24% yield over 3 steps as a white solid.

**<sup>1</sup>H NMR** (600 MHz, Acetone-*d*<sub>6</sub>): δ 8.64 (s, 2H), 8.41 (s, 1H), 7.99 (s, 1H), 7.91 (d, *J* = 8.0 Hz, 2H), 7.74 (d, *J* = 8.1 Hz, 2H), 4.35 (q, *J* = 7.2 Hz, 2H), 2.47 (s, 3H), 1.35 (t, *J* = 7.2 Hz, 3H);

**<sup>13</sup>C NMR** (151 MHz, Acetone-*d*<sub>6</sub>): δ 165.37, 165.15, 161.40, 141.97, 138.20, 132.83 (q, *J* = 34.1 Hz), 132.74, 131.78 (q, *J* = 32.0 Hz), 131.71, 130.76 (q, *J* = 4.0 Hz), 130.60, 127.82 (p, *J* = 3.6 Hz), 126.45 (q, *J* = 3.5 Hz), 125.00 (q, *J* = 272.0 Hz), 124.03 (q, *J* = 272.2 Hz), 62.48, 17.95, 14.44;

**<sup>19</sup>F NMR** (565 MHz, Acetone-*d*<sub>6</sub>): δ -63.46, -63.47;

**HRMS (ESI) *m/z*:** calculated for C<sub>23</sub>H<sub>16</sub>F<sub>9</sub>NO<sub>4</sub>Na [M+Na]<sup>+</sup>: 564.0828, found: 564.0828.

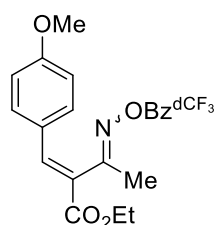

**17E**

**Ethyl 3-(((3,5-bis(trifluoromethyl)benzoyl)oxy)imino)-2-((E)-4-methoxybenzylidene)butanoate (17E):** 33% yield over 4 steps as a white solid.

**<sup>1</sup>H NMR** (600 MHz, Acetone-*d*<sub>6</sub>): δ 8.66 (s, 2H), 8.42 (s, 1H), 7.83 (s, 1H), 7.67 (d, *J* = 8.6 Hz, 2H), 6.96 (d, *J* = 8.6 Hz, 2H), 4.29 (q, *J* = 7.3 Hz, 2H), 3.83 (s, 3H), 2.45 (s, 3H), 1.32 (t, *J* = 7.0 Hz, 3H);

**<sup>13</sup>C NMR** (151 MHz, Acetone-*d*<sub>6</sub>): δ 166.01, 165.90, 162.65, 161.47, 143.21, 133.44, 132.92, 132.83 (q, *J* = 34.1 Hz), 130.75 (q, *J* = 3.6 Hz), 127.75 (p, *J* = 3.6 Hz), 126.60, 125.19, 124.05 (q, *J* = 272.1 Hz), 115.23, 61.91, 55.81, 17.90, 14.53;

**<sup>19</sup>F NMR** (565 MHz, Acetone-*d*<sub>6</sub>): δ -63.43;

**HRMS (ESI) *m/z*:** calculated for C<sub>23</sub>H<sub>19</sub>F<sub>6</sub>NO<sub>5</sub>Na [M+Na]<sup>+</sup>: 526.1060, found: 526.1057.

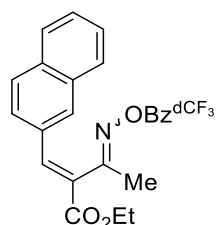

**17F**

**Ethyl 2E-3-(((3,5-bis(trifluoromethyl)benzoyl)oxy)imino)-2-(naphthalen-2-ylmethylene)butanoate (17F):** 38% yield over 4 steps as a white solid.

**<sup>1</sup>H NMR** (600 MHz, Acetone-*d*<sub>6</sub>): δ 8.67 (s, 2H), 8.42 (s, 1H), 8.32 (s, 1H), 8.08 (s, 1H), 7.98 (d, *J* = 7.9 Hz, 1H), 7.90 (d, *J* = 8.4 Hz, 2H), 7.75 (d, *J* = 8.7 Hz, 1H), 7.59-7.52 (m, 2H), 4.35 (q, *J* = 7.1 Hz, 2H), 2.50 (s, 3H), 1.36 (t, *J* = 7.1 Hz, 3H);

**<sup>13</sup>C NMR** (151 MHz, Acetone-*d*<sub>6</sub>): δ 165.87, 165.82, 161.56, 143.69, 134.94, 134.14, 132.86, 132.82 (q, *J* = 34.1 Hz), 132.71, 131.80, 130.77 (q, *J* = 3.6 Hz), 129.77, 129.28, 128.61, 128.51, 128.11, 127.78 (p, *J* = 3.6 Hz), 127.65, 127.15, 124.05 (q, *J* = 272.0 Hz), 62.21, 18.11, 14.52;

## SUPPORTING INFORMATION

$^{19}\text{F}$  NMR (565 MHz, Acetone- $d_6$ ):  $\delta$  -63.42;

HRMS (ESI)  $m/z$ : calculated for  $\text{C}_{26}\text{H}_{19}\text{F}_6\text{NO}_4\text{Na}$   $[\text{M}+\text{Na}]^+$ : 546.1110, found: 546.1108.

### 2.3 General Procedure for the Synthesis of Silyl Enol Ethers<sup>[8]</sup>

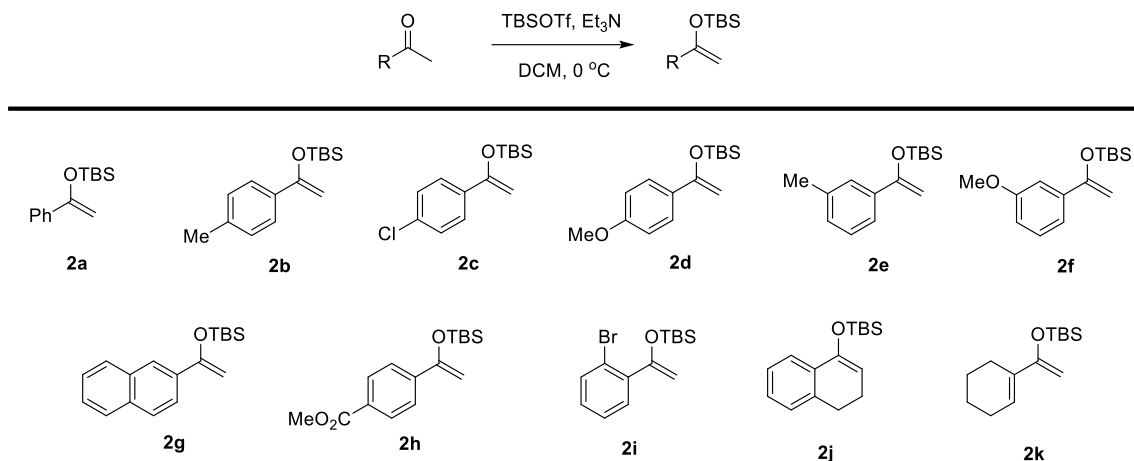

To a solution of the ketone (1.0 equiv.) in DCM (0.5 M) at 0 °C was added  $\text{Et}_3\text{N}$  (1.5 equiv.) and Trimethylsilyl trifluoromethanesulfonate (1.1 equiv.). The reaction mixture was stirred until the ketone was consumed (determined by TLC, 30 min in most cases) at the same temperature. Then saturated  $\text{NH}_4\text{Cl}$  aqueous solution was added and the mixture was extracted with DCM. The combined organic layers were washed with water and brine, and dried over  $\text{Na}_2\text{SO}_4$ . The resulting solution was concentrated under vacuum and the residue was purified by column chromatography on silica gel (1–2%  $\text{Et}_3\text{N}$  in PE) to afford the corresponding silyl enol ethers.

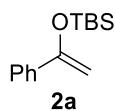

**tert-Butyldimethyl((1-phenylvinyl)oxy)silane (2a)**: 95% yield as a colorless oil.

$^1\text{H}$  NMR (400 MHz,  $\text{CDCl}_3$ ):  $\delta$  7.64–7.60 (m, 2H), 7.36–7.29 (m, 3H), 4.90 (d,  $J = 1.6$  Hz, 1H), 4.43 (d,  $J = 1.6$  Hz, 1H), 1.02 (s, 9H), 0.23 (s, 6H); Data in accordance with literature.<sup>[8a]</sup>

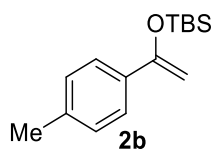

**tert-Butyldimethyl((1-(*p*-tolyl)vinyl)oxy)silane (2b)**: 92% yield as a colorless oil.

$^1\text{H}$  NMR (400 MHz,  $\text{CDCl}_3$ ):  $\delta$  7.52 (d,  $J = 8.0$  Hz, 2H), 7.15 (d,  $J = 8.0$  Hz, 2H), 4.86 (d,  $J = 1.6$  Hz, 1H), 4.39 (d,  $J = 1.6$  Hz, 1H), 2.37 (s, 3H), 1.02 (s, 9H), 0.23 (s, 6H); Data in accordance with literature.<sup>[8a]</sup>

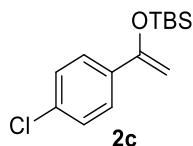

**tert-Butyl((1-(4-chlorophenyl)vinyl)oxy)dimethylsilane (2c)**: 90% yield as a colorless oil.

$^1\text{H}$  NMR (400 MHz,  $\text{CDCl}_3$ ):  $\delta$  7.55–7.52 (m, 2H), 7.31–7.27 (m, 2H), 4.86 (d,  $J = 1.9$  Hz, 1H), 4.43 (d,  $J = 1.9$  Hz, 1H), 1.00 (s, 9H), 0.21 (s, 6H); Data in accordance with literature.<sup>[8a]</sup>



## SUPPORTING INFORMATION

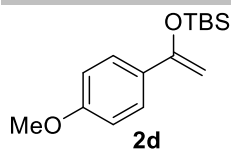

**tert-Butyl((1-(4-methoxyphenyl)vinyl)oxy)dimethylsilane (2d):** 92% yield as a colorless oil.

**<sup>1</sup>H NMR** (600 MHz, CDCl<sub>3</sub>): δ 7.55 (d, *J* = 8.4 Hz, 2H), 6.86 (d, *J* = 8.4 Hz, 2H), 4.78 (d, *J* = 1.6 Hz, 1H), 4.33 (d, *J* = 1.6 Hz, 1H), 3.82 (s, 3H), 1.01 (s, 9H), 0.21 (s, 6H); Data in accordance with literature.<sup>[8a]</sup>

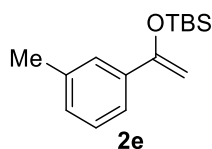

**tert-Butyldimethyl((1-(*m*-tolyl)vinyl)oxy)silane (2e):** 90% yield as a colorless oil.

**<sup>1</sup>H NMR** (400 MHz, CDCl<sub>3</sub>): δ 7.25-7.14 (m, 3H), 6.85-6.82 (m, 1H), 4.89 (d, *J* = 1.7 Hz, 1H), 4.42 (d, *J* = 1.7 Hz, 1H), 3.81 (s, 3H), 1.01 (s, 9H), 0.21 (s, 6H); Data in accordance with literature.<sup>[8a]</sup>

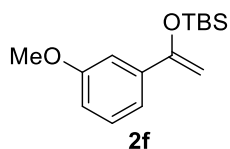

**tert-Butyl((1-(3-methoxyphenyl)vinyl)oxy)dimethylsilane (2f):** 95% yield as a colorless oil.

**<sup>1</sup>H NMR** (400 MHz, CDCl<sub>3</sub>): δ 7.58-7.54 (m, 2H), 6.88-6.84 (m, 2H), 4.78 (d, *J* = 1.6 Hz, 1H), 4.34 (d, *J* = 1.6 Hz, 1H), 3.82 (s, 3H), 1.02 (s, 9H), 0.22 (s, 6H); Data in accordance with literature.<sup>[8a]</sup>

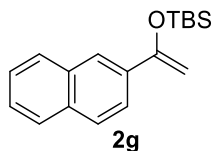

**tert-Butyldimethyl((1-(naphthalen-2-yl)vinyl)oxy)silane (2g):** 90% yield as a white solid.

**<sup>1</sup>H NMR** (400 MHz, CDCl<sub>3</sub>): δ 8.08 (s, 1H), 7.85-7.76 (m, 3H), 7.71 (dd, *J* = 8.6, 1.8 Hz, 1H), 7.49-7.44 (m, 2H), 5.04 (d, *J* = 1.7 Hz, 1H), 4.54 (d, *J* = 1.7 Hz, 1H), 1.05 (s, 9H), 0.24 (s, 3H); Data in accordance with literature.<sup>[8a]</sup>

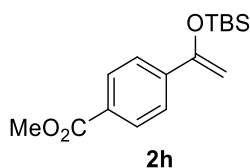

**Methyl 4-1-((tert-butyldimethylsilyl)oxy)vinyl)benzoate (2h):** 88% yield as a colorless oil.

**<sup>1</sup>H NMR** (400 MHz, CDCl<sub>3</sub>): δ 8.01-7.98 (m, 2H), 7.68-7.65 (m, 2H), 4.99 (d, *J* = 1.9 Hz, 1H), 4.53 (d, *J* = 1.9 Hz, 1H), 3.91 (s, 3H), 1.00 (s, 9H), 0.21 (s, 6H); Data in accordance with literature.<sup>[8a]</sup>

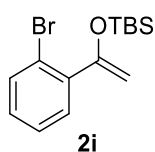

**((1-(2-Bromophenyl)vinyl)oxy)(tert-butyl)dimethylsilane (2i):** 85% yield as a colorless oil.

## SUPPORTING INFORMATION

$^1\text{H NMR}$  (400 MHz,  $\text{CDCl}_3$ ):  $\delta$  7.58 (dd,  $J = 7.6, 1.8$  Hz, 1H), 7.29-7.24 (m, 1H), 6.91-6.95 (m, 2H), 5.04 (d,  $J = 1.6$  Hz, 1H), 4.52 (d,  $J = 1.6$  Hz, 1H), 1.02 (s, 9H), 0.22 (s, 3H); Data in accordance with literature.<sup>[8a]</sup>

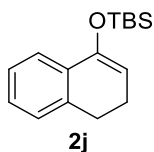

**tert-Butyl((3,4-dihydronaphthalen-1-yl)oxy)dimethylsilane (2j):** 82% yield as a colorless oil.

$^1\text{H NMR}$  (400 MHz,  $\text{CDCl}_3$ ):  $\delta$  7.48 (d,  $J = 7.2$  Hz, 1H), 7.23-7.11 (m, 3H), 5.18 (t,  $J = 4.6$  Hz, 1H), 2.77 (t,  $J = 8.0$  Hz, 2H), 2.35-2.29 (m, 2H), 1.03 (s, 9H), 0.22 (s, 6H); Data in accordance with literature.<sup>[8a]</sup>

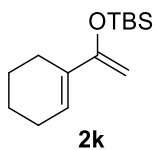

**tert-Butyl((1-(cyclohex-1-en-1-yl)vinyl)oxy)dimethylsilane (2k):** 85% yield as a colorless oil.

$^1\text{H NMR}$  (600 MHz,  $\text{CDCl}_3$ ):  $\delta$  6.25 (t,  $J = 3.6$  Hz, 1H), 4.34 (d,  $J = 1.2$  Hz, 1H), 4.18 (d,  $J = 1.2$  Hz, 1H), 2.15-2.13 (m, 4H), 1.69-1.65 (m, 2H), 1.59-1.55 (m, 2H), 0.97 (s, 9H), 0.18 (s, 6H); Data in accordance with literature.<sup>[8a]</sup>

## SUPPORTING INFORMATION

### 3. Reaction Investigation and Condition Optimization

#### 3.1 Oxime Ester Substituent Screening

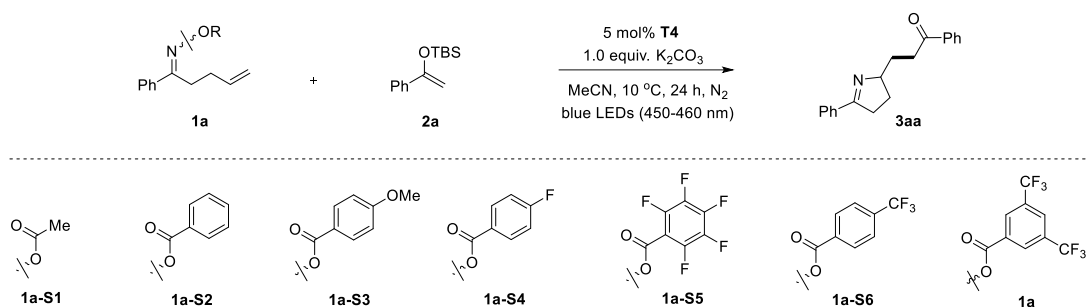

**Table S1.** Screening of Oxime Ester Substituent <sup>[a]</sup>.

| Entry | Oxime ester  | Yield of 3aa (%) <sup>[b]</sup> |
|-------|--------------|---------------------------------|
| 1     | <b>1a-S1</b> | NR                              |
| 2     | <b>1a-S2</b> | NR                              |
| 3     | <b>1a-S3</b> | NR                              |
| 4     | <b>1a-S4</b> | 26                              |
| 5     | <b>1a-S5</b> | 34                              |
| 6     | <b>1a-S6</b> | 55                              |
| 7     | <b>1a</b>    | 83                              |

[a] Reaction conditions: **1a** (0.20 mmol), **2a** (0.60 mmol), **T4** (0.01 mmol), K<sub>2</sub>CO<sub>3</sub> (0.20 mmol), MeCN (1.0 mL), under the irradiation of 20 W blue LEDs for 24 h at 10 °C in a sealed tube under N<sub>2</sub> atmosphere. [b] Yield determined by <sup>1</sup>H NMR analysis of the crude mixture using trimethoxybenzene as the internal standard.

#### 3.2 Irradiation Wavelength Screening

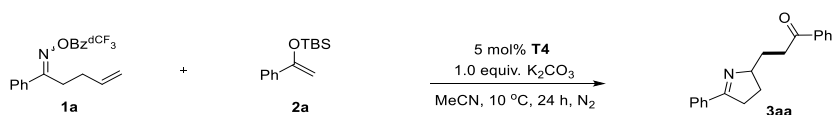

**Table S2.** Screening of Irradiation Wavelength <sup>[a]</sup>.

| Entry | Irradiation Wavelength   | Yield of 3aa (%) <sup>[b]</sup> |
|-------|--------------------------|---------------------------------|
| 1     | white LEDs (400-830 nm)  | 20                              |
| 2     | green LEDs (520-530 nm)  | 0                               |
| 3     | blue LEDs (450-460 nm)   | 83                              |
| 4     | blue LEDs (420-430 nm)   | 75                              |
| 5     | purple LEDs (390-400 nm) | 70                              |
| 6     | UV (360-370 nm)          | 57                              |

[a] Reaction conditions: **1a** (0.20 mmol), **2a** (0.60 mmol), **T4** (0.01 mmol), K<sub>2</sub>CO<sub>3</sub> (0.20 mmol), MeCN (1.0 mL), under the irradiation of 20 W LEDs for 24 h at 10 °C in a sealed tube under N<sub>2</sub> atmosphere. [b] Yield determined by <sup>1</sup>H NMR analysis of the crude mixture using trimethoxybenzene as the internal standard.

# SUPPORTING INFORMATION

## 3.3 Condition Optimization for the Synthesis of Pyrroline 3

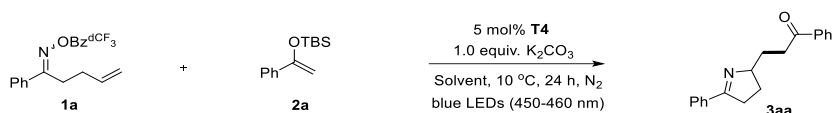

**Table S3.** Condition Optimization for the Synthesis of **3aa** <sup>[a]</sup>.

| Entry             | Base                            | Solvent | Temperature | Time (h) | Yield of <b>3aa</b> (%) <sup>[b]</sup> |
|-------------------|---------------------------------|---------|-------------|----------|----------------------------------------|
| 1                 | Na <sub>2</sub> CO <sub>3</sub> | MeCN    | 10 °C       | 24       | 49                                     |
| 2                 | KHCO <sub>3</sub>               | MeCN    | 10 °C       | 24       | 20                                     |
| 3                 | K <sub>2</sub> CO <sub>3</sub>  | MeCN    | 10 °C       | 24       | 83 (77 <sup>[c]</sup> )                |
| 4                 | K <sub>3</sub> PO <sub>4</sub>  | MeCN    | 10 °C       | 24       | 74                                     |
| 5                 | Cs <sub>2</sub> CO <sub>3</sub> | MeCN    | 10 °C       | 24       | 67                                     |
| 6                 | KOtBu                           | MeCN    | 10 °C       | 24       | trace                                  |
| 7                 | Et <sub>3</sub> N               | MeCN    | 10 °C       | 24       | 5                                      |
| 8                 | DMAP                            | MeCN    | 10 °C       | 24       | 36                                     |
| 9                 | K <sub>2</sub> CO <sub>3</sub>  | DCM     | 10 °C       | 24       | NR                                     |
| 10                | K <sub>2</sub> CO <sub>3</sub>  | Dioxane | 10 °C       | 24       | NR                                     |
| 11                | K <sub>2</sub> CO <sub>3</sub>  | Acetone | 10 °C       | 24       | 7                                      |
| 12                | K <sub>2</sub> CO <sub>3</sub>  | DMSO    | 10 °C       | 24       | NR                                     |
| 13                | K <sub>2</sub> CO <sub>3</sub>  | DMF     | 10 °C       | 24       | 34                                     |
| 14                | K <sub>2</sub> CO <sub>3</sub>  | DMAc    | 10 °C       | 24       | 22                                     |
| 15                | K <sub>2</sub> CO <sub>3</sub>  | MeCN    | rt          | 12       | 54                                     |
| 16                | K <sub>2</sub> CO <sub>3</sub>  | MeCN    | 0 °C        | 24       | 56                                     |
| 17                | none                            | MeCN    | 10 °C       | 24       | trace                                  |
| 18 <sup>[d]</sup> | K <sub>2</sub> CO <sub>3</sub>  | MeCN    | 10 °C       | 24       | 0                                      |
| 19 <sup>[e]</sup> | K <sub>2</sub> CO <sub>3</sub>  | MeCN    | 10 °C       | 24       | 0                                      |
| 20 <sup>[f]</sup> | K <sub>2</sub> CO <sub>3</sub>  | MeCN    | 10 °C       | 24       | 0                                      |
| 21                | K <sub>2</sub> CO <sub>3</sub>  | MeCN    | 10 °C       | 12       | 78                                     |
| 22 <sup>[g]</sup> | K <sub>2</sub> CO <sub>3</sub>  | MeCN    | 10 °C       | 12       | 52                                     |

[a] Reaction conditions: **1a** (0.20 mmol), **2a** (0.60 mmol), **T4** (0.01 mmol), base (0.20 mmol), solvent (1.0 mL), under the irradiation of 20 W blue LEDs in a sealed tube under N<sub>2</sub> atmosphere. [b] Yield determined by <sup>1</sup>H NMR analysis of the crude mixture using trimethoxybenzene as the internal standard. [c] Isolated yield. [d] Reaction performed in the absence of **T4**. [e] Reaction performed without irradiation. [f] Reaction performed under Air. [g] Reaction performed using 0.5 equiv. of K<sub>2</sub>CO<sub>3</sub>.

## SUPPORTING INFORMATION

### 3.4 Condition Optimization for the Synthesis of Ketonitrile 5

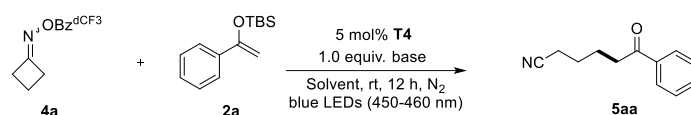

**Table S4.** Condition Optimization for the Synthesis of **5aa**<sup>[a]</sup>

| entry            | Base                            | Solvent | Yield of <b>10aa</b> (%) <sup>[b]</sup> |
|------------------|---------------------------------|---------|-----------------------------------------|
| 1                | K <sub>2</sub> CO <sub>3</sub>  | MeCN    | 52                                      |
| 2                | Na <sub>2</sub> CO <sub>3</sub> | MeCN    | 56                                      |
| 3                | K <sub>3</sub> PO <sub>3</sub>  | MeCN    | 34                                      |
| 4                | Na <sub>2</sub> CO <sub>3</sub> | DMF     | 80 (75 <sup>[c]</sup> )                 |
| 5                | Na <sub>2</sub> CO <sub>3</sub> | DMAc    | 65                                      |
| 6                | K <sub>2</sub> CO <sub>3</sub>  | DMF     | 60                                      |
| 7                | none                            | DMF     | 0                                       |
| 8 <sup>[d]</sup> | Na <sub>2</sub> CO <sub>3</sub> | DMF     | 0                                       |
| 9 <sup>[e]</sup> | Na <sub>2</sub> CO <sub>3</sub> | DMF     | 0                                       |

[a] Reaction conditions: **4a** (0.20 mmol), **2a** (0.60 mmol), **T4** (0.01 mmol), base (0.20 mmol), solvent (2.0 mL), under the irradiation of 20 W blue LEDs in a sealed tube for 24 h at room temperature under N<sub>2</sub> atmosphere. [b] Yield determined by <sup>1</sup>H NMR analysis of the crude mixture using trimethoxybenzene as the internal standard. [c] Isolated yield. [d] Reaction performed in the absence of **T4**. [e] Reaction performed without irradiation.

### 3.5 Condition Optimization for the Synthesis of Phenanthridine 18

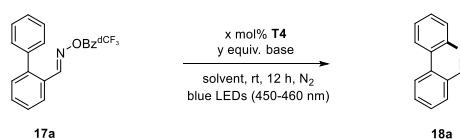

**Table S5.** Condition Optimization for the Synthesis of **18a**<sup>[a]</sup>

| Entry             | x  | y   | Base                            | Solvent | Yield of <b>18a</b> (%) <sup>[b]</sup> |
|-------------------|----|-----|---------------------------------|---------|----------------------------------------|
| 1                 | 10 | 1.0 | K <sub>2</sub> CO <sub>3</sub>  | MeCN    | 65                                     |
| 2                 | 10 | 1.0 | K <sub>2</sub> CO <sub>3</sub>  | DMF     | 72                                     |
| 3                 | 10 | 1.0 | K <sub>2</sub> CO <sub>3</sub>  | DMAc    | 72                                     |
| 4                 | 10 | 1.0 | K <sub>2</sub> CO <sub>3</sub>  | DMSO    | 56                                     |
| 5                 | 10 | 1.0 | Na <sub>2</sub> CO <sub>3</sub> | DMF     | 80                                     |
| 6                 | 10 | 1.0 | NaHCO <sub>3</sub>              | DMF     | 76                                     |
| 7                 | 10 | 1.0 | DMAP                            | DMF     | 67                                     |
| 8                 | 5  | 1.0 | Na <sub>2</sub> CO <sub>3</sub> | DMF     | 83                                     |
| 9                 | 2  | 0.5 | Na <sub>2</sub> CO <sub>3</sub> | DMF     | 85 (82 <sup>[c]</sup> )                |
| 10                | 2  | 0.4 | Na <sub>2</sub> CO <sub>3</sub> | DMF     | 70                                     |
| 11                | 1  | 0.5 | Na <sub>2</sub> CO <sub>3</sub> | DMF     | 72                                     |
| 12                | 2  | 0   | none                            | DMF     | 0                                      |
| 13 <sup>[d]</sup> | 0  | 0.5 | Na <sub>2</sub> CO <sub>3</sub> | DMF     | 0                                      |
| 14 <sup>[e]</sup> | 2  | 0.5 | Na <sub>2</sub> CO <sub>3</sub> | DMF     | 0                                      |

[a] Reaction conditions: **17a** (0.20 mmol), **T4** (x mol%), base (y equiv.), solvent (2.0 mL), under the irradiation of 20 W blue LEDs in a sealed tube for 12 h at room temperature under N<sub>2</sub> atmosphere. [b] Yield determined by <sup>1</sup>H NMR analysis of the crude mixture using trimethoxybenzene as the internal standard. [c] Isolated yield. [d] Reaction performed in the absence of **T4**. [e] Reaction performed without irradiation.

## SUPPORTING INFORMATION

### 4. Mechanisms Study Experiments

#### 4.1 On-Off-On Experiment

A series of identical reactions between oxime ester **1a** and silyl enol ether **2a** were conducted under the standard conditions on a 0.2 mmol scale, using MeCN as the solvent, and employing 5 mol% of thiourea **T4** with 1.0 equiv. of  $K_2CO_3$ , under blue LED irradiation. The mixture was subjected to sequential periods of stirring under 20 w blue LED irradiation followed by stirring in the absence of light. At each time point (2h, 3h, 5h, 6h, 8h, 9h, 12h), one of the reactions was terminated and concentrated under reduced pressure. The crude material diluted with a  $CDCl_3$  solution and the yields of **3aa** were measured by  $^1H$  NMR analysis.

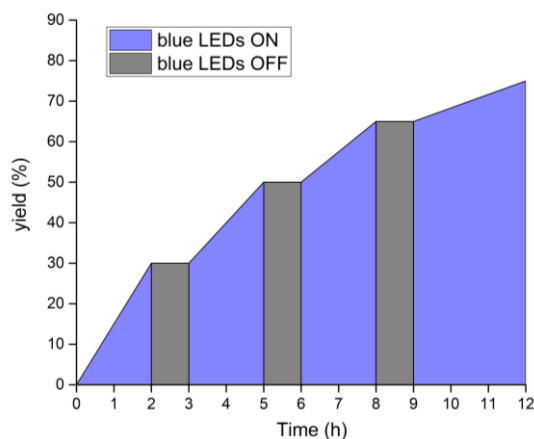

Figure S1: On-Off-On experiment over the time

#### 4.2 UV-Vis Absorption Spectroscopic Measurements

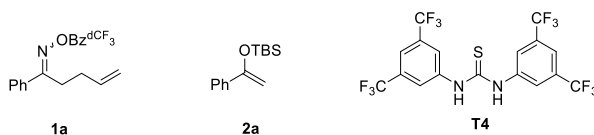

0.1M stock solutions of different starting materials were prepared using MeCN as solvent for measurements. The solution of **1a**+ $K_2CO_3$  or **1a**+**T4**+ $K_2CO_3$  was stirred under  $N_2$  for 1 h in dark using MeCN as solvent and the supernatant was separated for measurement.

##### 4.2.1 UV/vis absorption spectra of the combination between **1a**, **2a**, **T4** and $K_2CO_3$

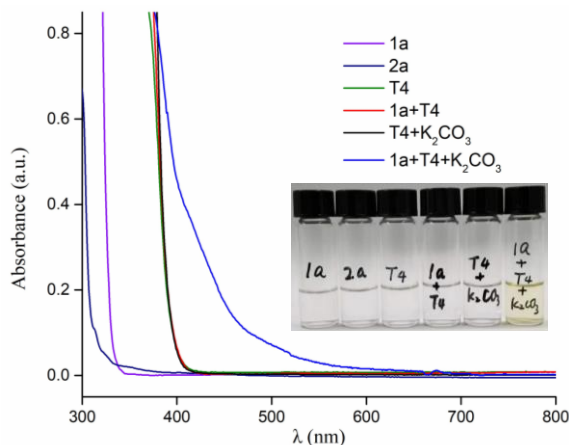

Figure S2: UV/vis absorption spectra of the combination between **1a**, **2a**, **T4** and  $K_2CO_3$ .

## SUPPORTING INFORMATION

### 4.2.2 UV/vis absorption spectra of the combination between 1a, T4 and DMAP

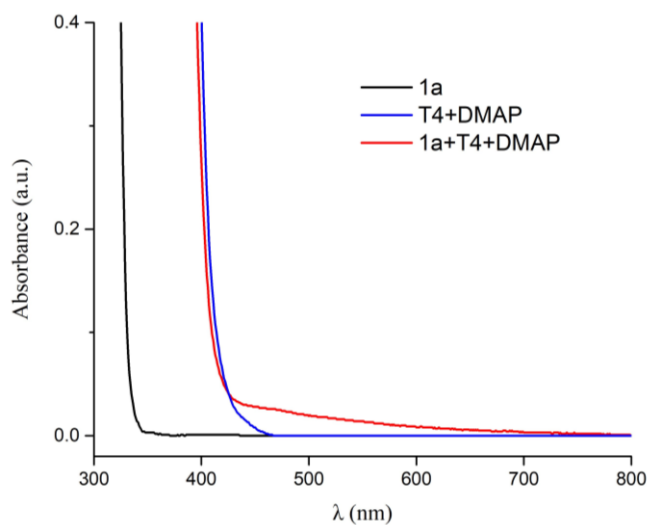

Figure S3: UV/vis absorption spectra of the combination between 1a, T4 and DMAP.

### 4.3 Job's Plot Experiment

Eleven measurements with T4+DMAP molar fraction of 0, 10%, 20%, 30%, 40%, 50%, 60%, 70%, 80%, 90%, 100% of the combination of 1a and T4+DMAP were recorded. The absorbance obtained at 460 nm was selected and plotted.

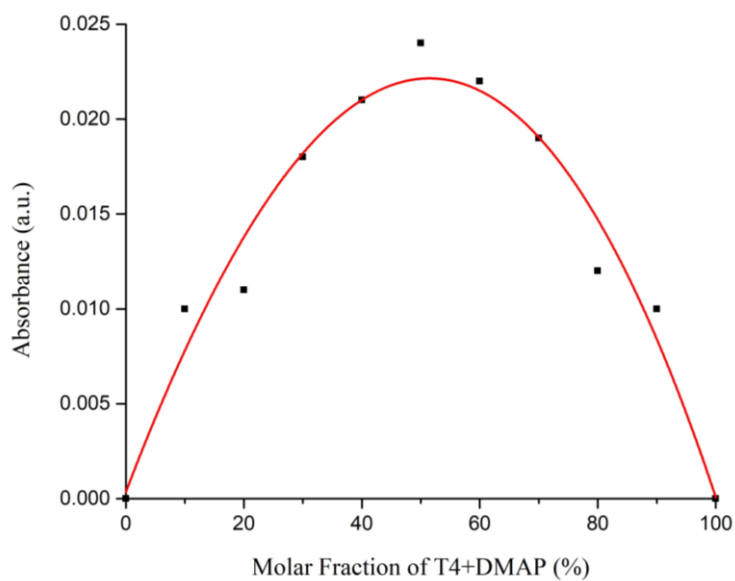

Figure S4: Job's plot of the EDA complexes with UV-Vis absorption spectrometry.

## SUPPORTING INFORMATION

### 4.4 NMR Titration Experiment

Solutions containing equal molar concentrations of the donor (**T4**+DMAP, 0.1 M in DMSO- $d_6$ ) and the acceptor (**1a**, 0.1 M in DMSO- $d_6$ ) were prepared and mixed to cover acceptor/donor ratio from 0%, 10%, 20% to 100% donor.

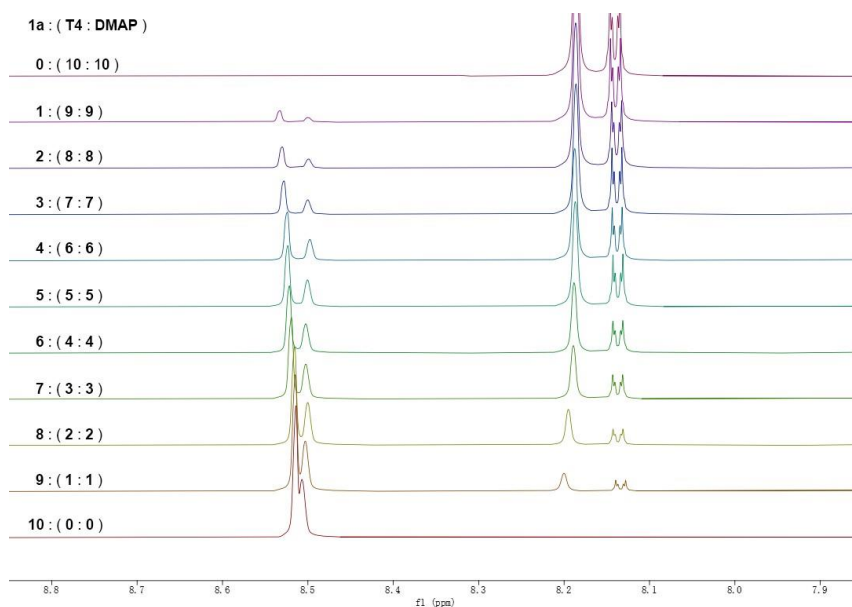

Figure S5:  $^1\text{H}$  NMR titration of the combination between **1a**, **T4** and DMAP.

### 4.5 Radical Trap Experiment

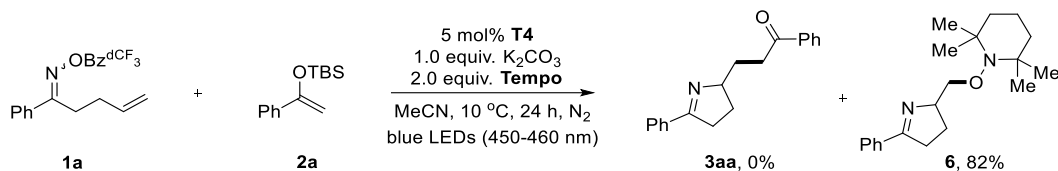

An oven-dried Schlenk tube equipped with a stirring bar was charged with **1a** (0.2 mmol, 83.07 mg, 1.0 equiv.), **T4** (0.01 mmol, 5.0 mg, 5 mol%),  $\text{K}_2\text{CO}_3$  (0.2 mmol, 27.60 mg, 1.0 equiv.) and **Tempo** (0.4 mmol, 62.50 mg, 2.0 equiv.). After refilling with  $\text{N}_2$  repeated three times, MeCN (1.0 mL) and **2a** (0.6 mmol, 140.65 mg, 3.0 equiv.) was added through syringe. The mixture was stirred at  $10^\circ\text{C}$  in a freezer for 24 h in front of a 20 W blue LEDs bulb. Saturated  $\text{NaHCO}_3$  aqueous solution and EtOAc were added and the mixture was stirred for 10 min. The layers were separated and the aqueous layer was extracted with EtOAc. The combined organic layers were then washed with brine, dried over  $\text{Na}_2\text{SO}_4$  and concentrated in vacuo. The residue was purified by column chromatography on silica gel to afford the corresponding product.

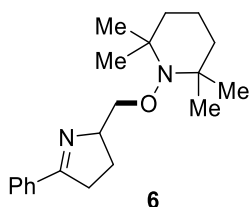

**2,2,6,6-Tetramethyl-1-((5-phenyl-3,4-dihydro-2H-pyrrol-2-yl)methoxy)piperidine (6)**: 52.8 mg, 84% yield as a pale yellow solid.  $^1\text{H}$  NMR (600 MHz,  $\text{CDCl}_3$ ):  $\delta$  7.87-7.85 (m, 2H), 7.43-7.39 (m, 3H), 4.47-4.43 (m, 1H), 4.07 (dd,  $J = 8.4, 3.6$  Hz, 1H), 3.97 (dd,  $J = 8.4, 3.6$  Hz, 1H), 3.07-2.94 (m, 2H), 2.19-2.13 (m, 1H), 2.07-2.02 (m, 1H), 1.52-1.27 (m, 6H), 1.23 (s, 3H), 1.17 (s, 3H), 1.12 (s, 3H), 0.96 (s, 3H);



## SUPPORTING INFORMATION

$^{13}\text{C}$  NMR (151 MHz,  $\text{CDCl}_3$ ):  $\delta$  173.21, 134.52, 130.05, 128.13, 127.49, 78.90, 72.12, 59.65, 39.40, 35.17, 33.00, 32.79, 25.68, 20.02, 19.77, 16.86; Data in accordance with literature.<sup>[5b]</sup>

### 4.6 Radical Clock Experiment

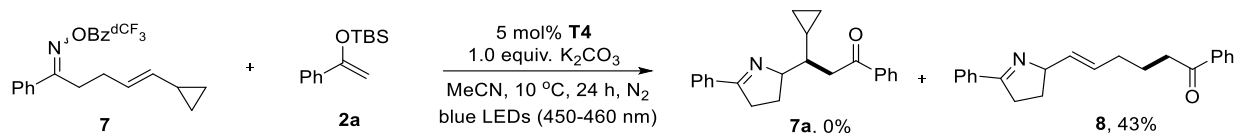

An oven-dried Schlenk tube equipped with a stirring bar was charged with **5** (0.2 mmol, 91.03 mg, 1.0 equiv.), **T4** (0.01 mmol, 5.0 mg, 5 mol%) and  $\text{K}_2\text{CO}_3$  (0.2 mmol, 27.60 mg, 1.0 equiv.). After refilling with  $\text{N}_2$  repeated three times, MeCN (1.0 mL) and **2a** (0.6 mmol, 140.65 mg, 3.0 equiv.) was added through syringe. The mixture was stirred at 10 °C in a freezer for 24 h in front of a 20 W blue LEDs bulb. Saturated  $\text{NaHCO}_3$  aqueous solution and EtOAc were added and the mixture was stirred for 10 min. The layers were separated and the aqueous layer was extracted with EtOAc. The combined organic layers were then washed with brine, dried over  $\text{Na}_2\text{SO}_4$  and concentrated in vacuo. The residue was purified by column chromatography on silica gel to afford the corresponding product.

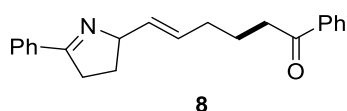

**(E)-1-Phenyl-6-(5-phenyl-3,4-dihydro-2H-pyrrol-2-yl)hex-5-en-1-one (8)**: 27.0 mg, 43% yield as a pale yellow solid.

$^1\text{H}$  NMR (600 MHz,  $\text{CDCl}_3$ ):  $\delta$  7.95 (d,  $J$  = 7.2 Hz, 2H), 7.86 (d,  $J$  = 6.7 Hz, 2H), 7.54 (t,  $J$  = 7.4 Hz, 1H), 7.47-7.37 (m, 5H), 5.71 (dt,  $J$  = 15.4, 6.6 Hz, 1H), 5.60 (dd,  $J$  = 15.4, 7.1 Hz, 1H), 4.69 (q,  $J$  = 7.4 Hz, 1H), 3.08-2.96 (m, 3H), 2.90 (dddd,  $J$  = 16.9, 9.5, 7.4, 1.9 Hz, 1H), 2.26 (dddd,  $J$  = 12.9, 9.6, 7.9, 4.9 Hz, 1H), 2.17 (q,  $J$  = 7.4 Hz, 2H), 1.87 (p,  $J$  = 7.4 Hz, 3H), 1.73 (ddt,  $J$  = 12.7, 9.8, 7.2 Hz, 1H);  $^{13}\text{C}$  NMR (151 MHz,  $\text{CDCl}_3$ ):  $\delta$  200.53, 173.19, 137.23, 134.60, 133.04, 133.02, 130.64, 130.42, 128.69, 128.54, 128.21, 127.94, 74.48, 37.99, 35.21, 32.01, 29.85, 23.83;

**HRMS (ESI) m/z**: calculated for  $\text{C}_{22}\text{H}_{24}\text{NO}$   $[\text{M}+\text{H}]^+$ : 318.1852, found: 318.1850.

### 4.7 Radical Conversion Experiment

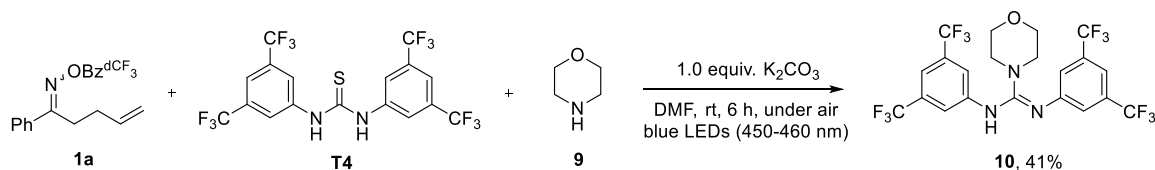

A glass tube equipped with a stirring bar was charged with **1a** (0.2 mmol, 83.07 mg, 1.0 equiv.), **T4** (0.2 mmol, 100.06 mg, 1.0 equiv) and  $\text{K}_2\text{CO}_3$  (0.2 mmol, 27.60 mg, 1.0 equiv.). DMF (2.0 mL) and **7** (0.4 mmol, 34.82 mg, 2.0 equiv.) was added through syringe. The mixture was stirred at room temperature for 6 h in front of a 20 W blue LEDs bulb. Saturated  $\text{NaHCO}_3$  aqueous solution and EtOAc were added and the mixture was stirred for 10 min. The layers were separated and the aqueous layer was extracted with EtOAc. The combined organic layers were then washed with brine, dried over  $\text{Na}_2\text{SO}_4$  and concentrated in vacuo. The residue was purified by column chromatography on silica gel to afford the corresponding product.

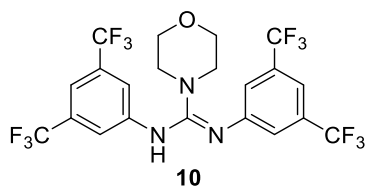

**N,N'-Bis(3,5-bis(trifluoromethyl)phenyl)morpholine-4-carboximidamide (10)**: 45.3 mg, 41% yield as a white solid.

$^1\text{H}$  NMR (600 MHz,  $\text{CDCl}_3$ ):  $\delta$  7.37 (s, 2H), 7.23 (s, 4H), 3.76 (t,  $J$  = 4.8 Hz, 4H), 3.46 (t,  $J$  = 4.8 Hz, 4H);

## SUPPORTING INFORMATION

---

**<sup>13</sup>C NMR** (151 MHz, CDCl<sub>3</sub>): δ 149.72, 132.76 (q, *J* = 33.2 Hz), 123.14 (q, *J* = 273.0 Hz), 115.90 (p, *J* = 3.9 Hz), 66.41, 47.42; (2 aromatic carbon signals are not observed due to signal weakness.)

**<sup>19</sup>F NMR** (565 MHz, CDCl<sub>3</sub>): δ -63.34;

**HRMS (ESI) *m/z***: calculated for C<sub>21</sub>H<sub>16</sub>F<sub>12</sub>N<sub>3</sub>O [M+H]<sup>+</sup>: 554.1096, found: 554.1085.

## SUPPORTING INFORMATION

### 5. Computational Study Experiments

#### 5.1 Computational Methods

All the density functional theory (DFT) calculations were carried out with the Gaussian16<sup>[9]</sup> series of programs. DFT method B3LYP<sup>[10]</sup> with a 6-31G(d) basis set was used for geometry optimizations. Frequency analysis was performed at the same level to provide correction to thermodynamic functions and confirm the nature of optimized structures (minima and transition states featured zero or one imaginary frequency, respectively). The M06<sup>[11]</sup> functional in combination with the 6-311+G(d,p) basis set was used to calculate the single point energies to give more accurate energy information. The solvent effects (acetonitrile, MeCN) were evaluated implicitly by a self-consistent reaction field (SCRf) approach for all the intermediates and transition states, using the integral equation formalism polarizable continuum model (IEF-PCM)<sup>[12]</sup>. The discussed energies were obtained at M06/6-311+G(d,p)/IEF-PCM(MeCN)//B3LYP/6-31G(d)/IEF-PCM(MeCN) level. Linear response time dependent DFT (TD-DFT) were calculation at B3LYP/6-31G(d)/IEF-PCM(MeCN) level.

#### 5.2 Absolute SPE, GFEC, GFE, and IF of the Optimized Structures

**Table S6.** The Single-Point Energies (SPE) Calculated at M06/6-311+G(d,p)/IEF-PCM(MeCN) Level, Gibbs Free Energy Corrections (GFEC) Calculated at B3LYP/6-31G(d)/IEF-PCM(MeCN) Level, Gibbs Free Energies (GFE = SPE + GFEC) of the Stationary Points Involved in the Reaction Models, and Imaginary Frequencies (IF) Calculated at B3LYP/6-31G(d)/IEF-PCM(MeCN) Level for the Transition States.

|                                                  | SPE (a.u.)   | GFEC (a.u.) | GFE (a.u.)   | IF( <i>i</i> ) |
|--------------------------------------------------|--------------|-------------|--------------|----------------|
| <b>T4</b>                                        | -2358.137739 | 0.173813    | -2357.963926 | -              |
| K <sub>2</sub> CO <sub>3</sub>                   | -1463.777307 | -0.018844   | -1463.796151 | -              |
| <b>int1</b>                                      | -3821.955174 | 0.176994    | -3821.77818  | -              |
| <b>ts1</b>                                       | -3821.953497 | 0.171671    | -3821.781826 | 1097.02        |
| <b>int2</b>                                      | -3821.961021 | 0.177700    | -3821.783321 | -              |
| <b>1a</b>                                        | -1574.945228 | 0.254984    | -1574.690244 | -              |
| <b>int3</b>                                      | -5396.923029 | 0.457468    | -5396.465561 | -              |
| <b>S1</b>                                        | -5396.83467  | 0.458989    | -5396.375681 | -              |
| <b>int4</b>                                      | -2357.484438 | 0.15783     | -2357.326608 | -              |
| <b>int5</b>                                      | -1575.050345 | 0.250650    | -1574.799695 | -              |
| K <sub>2</sub> CO <sub>3</sub> ·H <sup>+</sup>   | -1464.262022 | -0.007846   | -1464.269868 | -              |
| <b>ts2</b>                                       | -1575.028896 | 0.247002    | -1574.781894 | 833.86         |
| <b>-OBz<sup>dCF3</sup></b>                       | -1094.279873 | 0.065748    | -1094.214125 | -              |
| <b>int6</b>                                      | -480.811784  | 0.160308    | -480.651476  | -              |
| <b>ts3</b>                                       | -480.794543  | 0.161849    | -480.632694  | 474.49         |
| <b>int7</b>                                      | -480.824761  | 0.162664    | -480.662097  | -              |
| <b>ts3'</b>                                      | -480.787929  | 0.163153    | -480.624776  | 480.28         |
| <b>int7'</b>                                     | -480.826936  | 0.164378    | -480.662558  | -              |
| <b>2a</b>                                        | -911.199867  | 0.275543    | -910.924324  | -              |
| <b>ts4</b>                                       | -1392.027831 | 0.460307    | -1391.567524 | 305.41         |
| <b>int8</b>                                      | -1392.089404 | 0.467511    | -1391.621893 | -              |
| <b>int9</b>                                      | -2357.676251 | 0.159276    | -2357.516975 | -              |
| <b>int10</b>                                     | -1391.942534 | 0.472057    | -1391.470477 | -              |
| K <sub>2</sub> CO <sub>3</sub> ·TBS <sup>+</sup> | -1990.76519  | 0.165075    | -1990.600115 | -              |
| <b>3aa</b>                                       | -865.018622  | 0.286232    | -864.732390  | -              |

## SUPPORTING INFORMATION

### 5.3 The Energies and Cartesian Coordinates of the Optimized Structures

#### T4

|                                              |                             |
|----------------------------------------------|-----------------------------|
| Zero-point correction=                       | 0.241219 (Hartree/Particle) |
| Thermal correction to Energy=                | 0.269685                    |
| Thermal correction to Enthalpy=              | 0.270629                    |
| Thermal correction to Gibbs Free Energy=     | 0.173813                    |
| Sum of electronic and zero-point Energies=   | -2358.225595                |
| Sum of electronic and thermal Energies=      | -2358.197129                |
| Sum of electronic and thermal Enthalpies=    | -2358.196185                |
| Sum of electronic and thermal Free Energies= | -2358.293001                |

#### Cartesian coordinates

|   |             |             |             |
|---|-------------|-------------|-------------|
| C | 3.40309900  | -0.81927700 | -1.21032000 |
| C | 2.48242500  | 0.02212400  | -0.57779100 |
| C | 2.92699700  | 0.94800900  | 0.37272700  |
| C | 4.28153900  | 1.00267600  | 0.69710600  |
| C | 5.20771300  | 0.16359100  | 0.07565400  |
| C | 4.75754800  | -0.74034100 | -0.88488300 |
| H | 3.06293300  | -1.53402300 | -1.95243400 |
| H | 2.22388200  | 1.61809500  | 0.84779300  |
| H | 6.25876400  | 0.21755600  | 0.33197900  |
| C | 4.76245500  | 2.04175800  | 1.67591400  |
| F | 3.82612700  | 2.33257600  | 2.60482900  |
| F | 5.07310200  | 3.20546200  | 1.05550000  |
| F | 5.87378400  | 1.63984900  | 2.33060300  |
| C | 5.72935800  | -1.69407400 | -1.52812600 |
| F | 6.97465600  | -1.17546900 | -1.59463000 |
| F | 5.82392100  | -2.85380300 | -0.83505000 |
| F | 5.35672600  | -2.02020800 | -2.78541500 |
| N | 1.13051200  | -0.04709200 | -0.98621500 |
| C | -0.00159300 | -0.00712600 | -0.21383300 |
| S | -0.00550400 | -0.04934400 | 1.47049000  |
| N | -1.13024600 | 0.07126800  | -0.98867100 |
| C | -2.48361900 | -0.01507900 | -0.58935600 |
| C | -2.93376300 | -0.98453500 | 0.31411900  |
| C | -3.40136700 | 0.85214200  | -1.19043400 |
| C | -4.29067100 | -1.05589000 | 0.62555200  |
| H | -2.23527600 | -1.68276700 | 0.75394100  |
| C | -4.75826700 | 0.75526200  | -0.88061400 |
| H | -3.05760700 | 1.59741700  | -1.90014300 |
| C | -5.21396800 | -0.19184100 | 0.03469800  |
| H | -6.26851600 | -0.26749400 | 0.27009200  |
| C | -4.76085900 | -2.06482500 | 1.64051800  |
| C | -5.72867100 | 1.72753100  | -1.49782700 |
| F | -6.97042900 | 1.20569000  | -1.59650900 |
| F | -5.83615500 | 2.86006300  | -0.76291800 |
| F | -5.34533400 | 2.10259500  | -2.73821400 |
| F | -6.03285900 | -2.45691300 | 1.40904300  |
| F | -3.98913200 | -3.17385600 | 1.64620600  |
| F | -4.72918800 | -1.55962700 | 2.89671500  |
| H | -0.99524600 | 0.37911900  | -1.94611800 |
| H | 1.00017300  | -0.30548600 | -1.95881300 |

#### K<sub>2</sub>CO<sub>3</sub>

|                                              |                             |
|----------------------------------------------|-----------------------------|
| Zero-point correction=                       | 0.015868 (Hartree/Particle) |
| Thermal correction to Energy=                | 0.023089                    |
| Thermal correction to Enthalpy=              | 0.024033                    |
| Thermal correction to Gibbs Free Energy=     | -0.018844                   |
| Sum of electronic and zero-point Energies=   | -1463.757268                |
| Sum of electronic and thermal Energies=      | -1463.750047                |
| Sum of electronic and thermal Enthalpies=    | -1463.749103                |
| Sum of electronic and thermal Free Energies= | -1463.791980                |

#### Cartesian coordinates

|   |             |             |             |
|---|-------------|-------------|-------------|
| C | -0.00000500 | 0.84478900  | -0.00006400 |
| O | -1.12685100 | 1.47797500  | 0.04257100  |
| O | 1.12684100  | 1.47796900  | -0.04251700 |
| O | -0.00001300 | -0.47506200 | -0.00024200 |
| K | -2.59548300 | -0.65568200 | -0.00772800 |
| K | 2.59549400  | -0.65567600 | 0.00782700  |

## SUPPORTING INFORMATION

### int1

|                                              |                             |
|----------------------------------------------|-----------------------------|
| Zero-point correction=                       | 0.257892 (Hartree/Particle) |
| Thermal correction to Energy=                | 0.294826                    |
| Thermal correction to Enthalpy=              | 0.295770                    |
| Thermal correction to Gibbs Free Energy=     | 0.176994                    |
| Sum of electronic and zero-point Energies=   | -3822.037976                |
| Sum of electronic and thermal Energies=      | -3822.001041                |
| Sum of electronic and thermal Enthalpies=    | -3822.000097                |
| Sum of electronic and thermal Free Energies= | -3822.118874                |

### Cartesian coordinates

|   |             |             |             |
|---|-------------|-------------|-------------|
| C | 3.34504500  | 0.41270700  | 0.26509200  |
| C | 2.49849700  | -0.68235300 | -0.00217000 |
| C | 3.08613700  | -1.90437700 | -0.37007300 |
| C | 4.47710200  | -2.01233900 | -0.43944000 |
| C | 5.31594100  | -0.93485300 | -0.15864800 |
| C | 4.72653900  | 0.28189900  | 0.18997700  |
| H | 2.89008500  | 1.36484800  | 0.51734100  |
| H | 2.46374300  | -2.75664600 | -0.59779800 |
| H | 6.39241500  | -1.03730700 | -0.21365900 |
| C | 5.08105600  | -3.35146700 | -0.76754900 |
| F | 4.31051800  | -4.06319700 | -1.62100300 |
| F | 5.23877200  | -4.11672600 | 0.34114400  |
| F | 6.30371500  | -3.23342700 | -1.33341000 |
| C | 5.57913800  | 1.49757100  | 0.42972500  |
| F | 6.84710300  | 1.17708200  | 0.76549600  |
| F | 5.65174400  | 2.28861400  | -0.66969000 |
| F | 5.08424900  | 2.27497300  | 1.42525100  |
| N | 1.13094100  | -0.40600300 | 0.07994700  |
| C | 0.02535800  | -1.21299900 | 0.05724300  |
| S | 0.05220000  | -2.90874300 | 0.22141700  |
| N | -1.09729200 | -0.44885000 | -0.09487400 |
| C | -2.46439700 | -0.72634100 | 0.01761000  |
| C | -3.06148700 | -1.97602800 | 0.25169800  |
| C | -3.30325500 | 0.39822100  | -0.12551400 |
| C | -4.45353700 | -2.07499200 | 0.33091500  |
| H | -2.44449700 | -2.85563600 | 0.35875600  |
| C | -4.68448500 | 0.27399900  | -0.05344800 |
| H | -2.83952900 | 1.36514200  | -0.29021800 |
| C | -5.28375000 | -0.96642400 | 0.17692800  |
| H | -6.36066400 | -1.06353500 | 0.23447200  |
| C | -5.06159700 | -3.41433100 | 0.65141600  |
| C | -5.52905400 | 1.49506100  | -0.29398100 |
| F | -6.76419300 | 1.37952300  | 0.23818900  |
| F | -4.96666400 | 2.61239600  | 0.23021700  |
| F | -5.69341500 | 1.74009600  | -1.61918200 |
| F | -6.32731100 | -3.52336000 | 0.18788300  |
| F | -4.35107400 | -4.43657400 | 0.12356200  |
| F | -5.11749600 | -3.63255000 | 1.98898300  |
| H | -0.91823300 | 0.56040500  | -0.37122100 |
| H | 0.93505800  | 0.61760700  | 0.28949600  |
| C | -0.02953400 | 2.82057400  | -0.08431700 |
| O | -0.79334300 | 2.13197700  | -0.88733500 |
| O | 0.75648800  | 2.19039000  | 0.74374300  |
| O | -0.05461800 | 4.10636000  | -0.10721300 |
| K | -2.12738900 | 4.27229200  | -1.76323500 |
| K | 1.91774900  | 4.42014700  | 1.64067400  |

### ts1

|                                              |                             |
|----------------------------------------------|-----------------------------|
| Zero-point correction=                       | 0.253112 (Hartree/Particle) |
| Thermal correction to Energy=                | 0.289963                    |
| Thermal correction to Enthalpy=              | 0.290907                    |
| Thermal correction to Gibbs Free Energy=     | 0.171671                    |
| Sum of electronic and zero-point Energies=   | -3822.038872                |
| Sum of electronic and thermal Energies=      | -3822.002021                |
| Sum of electronic and thermal Enthalpies=    | -3822.001077                |
| Sum of electronic and thermal Free Energies= | -3822.120313                |

### Cartesian coordinates

|   |             |             |             |
|---|-------------|-------------|-------------|
| C | -3.44021000 | 0.50048300  | -0.21553100 |
| C | -2.54697700 | -0.58349100 | -0.09051100 |
| C | -3.08393300 | -1.86837500 | 0.09714100  |

## SUPPORTING INFORMATION

|   |             |             |             |
|---|-------------|-------------|-------------|
| C | -4.46916100 | -2.04544900 | 0.12815400  |
| C | -5.35318700 | -0.97575600 | -0.00794200 |
| C | -4.81503500 | 0.30263900  | -0.17224000 |
| H | -3.03332200 | 1.49773300  | -0.33776800 |
| H | -2.42365800 | -2.71471900 | 0.21673200  |
| H | -6.42454300 | -1.13103900 | 0.01810400  |
| C | -5.01232900 | -3.44284600 | 0.25818200  |
| F | -4.23743200 | -4.21907700 | 1.05003500  |
| F | -5.08387800 | -4.06837100 | -0.94339400 |
| F | -6.26057100 | -3.45972900 | 0.77843700  |
| C | -5.72498500 | 1.49820600  | -0.23467700 |
| F | -6.93099500 | 1.19531100  | -0.76334200 |
| F | -5.95922500 | 2.01862700  | 0.99641000  |
| F | -5.19995200 | 2.50194700  | -0.97962000 |
| N | -1.19378300 | -0.25028800 | -0.09266000 |
| C | -0.04910400 | -0.99422100 | -0.29428200 |
| S | -0.07067400 | -2.60490700 | -0.89371500 |
| N | 1.04496800  | -0.25314700 | -0.03858300 |
| C | 2.38445200  | -0.63681000 | -0.14723000 |
| C | 2.90602800  | -1.90223400 | 0.17881300  |
| C | 3.29153800  | 0.37926900  | -0.50257900 |
| C | 4.28306400  | -2.12710600 | 0.13168000  |
| H | 2.23620900  | -2.69554300 | 0.47813200  |
| C | 4.66439500  | 0.14568000  | -0.51993800 |
| H | 2.89991800  | 1.35941400  | -0.74744600 |
| C | 5.17952900  | -1.11387500 | -0.21280900 |
| H | 6.24634700  | -1.29854300 | -0.23293300 |
| C | 4.80362900  | -3.50897100 | 0.41992200  |
| C | 5.58954700  | 1.29797800  | -0.79101800 |
| F | 6.80709100  | 0.89817800  | -1.21358600 |
| F | 5.09373800  | 2.14536900  | -1.72247300 |
| F | 5.79311200  | 2.04616400  | 0.33024400  |
| F | 6.08197300  | -3.49164800 | 0.86186500  |
| F | 4.06429000  | -4.14685100 | 1.35612900  |
| F | 4.78621800  | -4.29418100 | -0.68606000 |
| H | 0.95098700  | 0.91881500  | 0.40940200  |
| H | -1.03163300 | 0.78237100  | -0.06833200 |
| C | 0.14430400  | 2.92858900  | 0.45467500  |
| O | 1.05490500  | 2.06442400  | 0.89766900  |
| O | -0.86500400 | 2.48464600  | -0.20581200 |
| O | 0.31892200  | 4.16626500  | 0.70532400  |
| K | 2.88669400  | 3.93878900  | 1.47325200  |
| K | -2.06654200 | 4.87739500  | -0.32356100 |

### int2

|                                              |                             |
|----------------------------------------------|-----------------------------|
| Zero-point correction=                       | 0.257309 (Hartree/Particle) |
| Thermal correction to Energy=                | 0.293830                    |
| Thermal correction to Enthalpy=              | 0.294774                    |
| Thermal correction to Gibbs Free Energy=     | 0.177700                    |
| Sum of electronic and zero-point Energies=   | -3822.040859                |
| Sum of electronic and thermal Energies=      | -3822.004338                |
| Sum of electronic and thermal Enthalpies=    | -3822.003393                |
| Sum of electronic and thermal Free Energies= | -3822.120468                |

### Cartesian coordinates

|   |             |             |             |
|---|-------------|-------------|-------------|
| C | -3.39265700 | 0.43370200  | -0.16101600 |
| C | -2.51839100 | -0.66674600 | -0.05276400 |
| C | -3.07864900 | -1.95566000 | -0.00407900 |
| C | -4.46396900 | -2.11478500 | -0.07974500 |
| C | -5.32965800 | -1.02505200 | -0.18336900 |
| C | -4.76997500 | 0.25340000  | -0.21565700 |
| H | -2.96940400 | 1.43076300  | -0.20196400 |
| H | -2.43176100 | -2.81541000 | 0.09309800  |
| H | -6.40187100 | -1.16668300 | -0.23372600 |
| C | -5.02918200 | -3.50904900 | -0.09817300 |
| F | -4.29811700 | -4.36721600 | 0.64933000  |
| F | -5.06143500 | -4.02259100 | -1.35370500 |
| F | -6.29815300 | -3.55201600 | 0.36912700  |
| C | -5.64970100 | 1.47167700  | -0.24772400 |
| F | -6.87813000 | 1.21044000  | -0.74286400 |
| F | -5.83011900 | 1.99601800  | 0.99243200  |
| F | -5.11371900 | 2.46482000  | -1.00132700 |

## SUPPORTING INFORMATION

|   |             |             |             |
|---|-------------|-------------|-------------|
| N | -1.16751100 | -0.35407400 | 0.06806900  |
| C | 0.00736000  | -1.04584300 | -0.21061900 |
| S | -0.00578700 | -2.65344800 | -0.85957400 |
| N | 1.06479600  | -0.27592100 | 0.01288300  |
| C | 2.39034300  | -0.67431000 | -0.08585500 |
| C | 2.92319300  | -1.86633200 | 0.45030400  |
| C | 3.29736500  | 0.24860500  | -0.64160100 |
| C | 4.29742600  | -2.10100400 | 0.42886400  |
| H | 2.25576000  | -2.59019200 | 0.89852900  |
| C | 4.67085600  | 0.00870000  | -0.64117600 |
| H | 2.90487300  | 1.16899600  | -1.06002400 |
| C | 5.19166400  | -1.17043900 | -0.11057400 |
| H | 6.25814400  | -1.35663500 | -0.10672800 |
| C | 4.82623500  | -3.40557700 | 0.95755400  |
| C | 5.57721400  | 1.08529200  | -1.16515000 |
| F | 6.85387200  | 0.67352800  | -1.30851100 |
| F | 5.16735500  | 1.55811000  | -2.36617900 |
| F | 5.60613100  | 2.16436500  | -0.32997500 |
| F | 6.09217700  | -3.29288700 | 1.42382500  |
| F | 4.07042400  | -3.89374800 | 1.96793100  |
| F | 4.85359400  | -4.36561400 | -0.00156200 |
| H | 1.06771000  | 1.40867400  | 0.45570500  |
| H | -1.00531000 | 0.64287000  | 0.26993600  |
| C | 0.10533800  | 3.11646500  | 0.62870500  |
| O | 1.26385500  | 2.38427800  | 0.63381400  |
| O | -0.99264200 | 2.49295600  | 0.54126300  |
| O | 0.25682500  | 4.36430600  | 0.71748500  |
| K | 3.00304500  | 4.42246300  | 0.47748100  |
| K | -2.47118400 | 4.76455200  | 0.67183400  |

### 1a

|                                              |                             |
|----------------------------------------------|-----------------------------|
| Zero-point correction=                       | 0.317016 (Hartree/Particle) |
| Thermal correction to Energy=                | 0.343224                    |
| Thermal correction to Enthalpy=              | 0.344168                    |
| Thermal correction to Gibbs Free Energy=     | 0.254984                    |
| Sum of electronic and zero-point Energies=   | -1575.059369                |
| Sum of electronic and thermal Energies=      | -1575.033161                |
| Sum of electronic and thermal Enthalpies=    | -1575.032216                |
| Sum of electronic and thermal Free Energies= | -1575.121401                |

### Cartesian coordinates

|   |             |             |             |
|---|-------------|-------------|-------------|
| C | 1.43052500  | 0.48799700  | -0.14156500 |
| C | 1.25289800  | -0.89585400 | -0.06486000 |
| C | 2.36963800  | -1.73758000 | 0.00747100  |
| C | 3.65089000  | -1.19399200 | 0.00679000  |
| C | 3.83383000  | 0.19041100  | -0.06111200 |
| C | 2.71989400  | 1.02371100  | -0.13439000 |
| H | 0.57184000  | 1.14428800  | -0.21029300 |
| H | 2.21868800  | -2.80933900 | 0.06002800  |
| H | 4.83201200  | 0.61151800  | -0.06415100 |
| C | 4.85213700  | -2.09466100 | 0.13425000  |
| F | 4.60671900  | -3.33296600 | -0.34302600 |
| F | 5.23191600  | -2.23704200 | 1.42586200  |
| F | 5.91810700  | -1.60290300 | -0.53459000 |
| C | 2.87397000  | 2.52125000  | -0.18711200 |
| F | 4.16099500  | 2.90368500  | -0.29821500 |
| F | 2.19757500  | 3.05259100  | -1.23001200 |
| F | 2.37602300  | 3.10540900  | 0.93174500  |
| C | -0.09747000 | -1.53770400 | -0.04379800 |
| O | -0.28322400 | -2.73025800 | 0.04600200  |
| O | -1.07562100 | -0.59541500 | -0.13476200 |
| N | -2.39425400 | -1.13060900 | -0.01064000 |
| C | -3.27269100 | -0.21182500 | -0.23878100 |
| C | -4.68661000 | -0.66167900 | -0.13139400 |
| C | -5.72241700 | 0.26589500  | 0.06985800  |
| C | -5.01287200 | -2.02878200 | -0.21767900 |
| C | -7.04555800 | -0.16122700 | 0.19145200  |
| H | -5.50483300 | 1.32586200  | 0.14666900  |
| C | -6.33390000 | -2.45062700 | -0.10228900 |
| H | -4.22214200 | -2.75146000 | -0.38596800 |
| C | -7.35638300 | -1.51859900 | 0.10435000  |
| H | -7.83164900 | 0.57067600  | 0.35303100  |

## SUPPORTING INFORMATION

|   |             |             |             |
|---|-------------|-------------|-------------|
| H | -6.56855500 | -3.50846300 | -0.18006400 |
| H | -8.38739300 | -1.84952700 | 0.19152500  |
| C | -2.93886100 | 1.22389200  | -0.58039800 |
| C | -2.59132500 | 2.08140800  | 0.66679000  |
| H | -3.77748300 | 1.67484100  | -1.11745200 |
| H | -2.08291100 | 1.22807400  | -1.26057600 |
| C | -2.26859400 | 3.50104800  | 0.28496300  |
| H | -1.74627400 | 1.62979300  | 1.19673900  |
| H | -3.44652700 | 2.06860100  | 1.35650200  |
| C | -1.09023600 | 4.09868500  | 0.47359200  |
| H | -3.07665600 | 4.05795800  | -0.19251100 |
| H | -0.25008100 | 3.58934400  | 0.94103200  |
| H | -0.92070100 | 5.12791300  | 0.16734100  |

### int3

|                                              |                             |
|----------------------------------------------|-----------------------------|
| Zero-point correction=                       | 0.575558 (Hartree/Particle) |
| Thermal correction to Energy=                | 0.640970                    |
| Thermal correction to Enthalpy=              | 0.641914                    |
| Thermal correction to Gibbs Free Energy=     | 0.457468                    |
| Sum of electronic and zero-point Energies=   | -5397.114929                |
| Sum of electronic and thermal Energies=      | -5397.049517                |
| Sum of electronic and thermal Enthalpies=    | -5397.048573                |
| Sum of electronic and thermal Free Energies= | -5397.233020                |

### Cartesian coordinates

|   |             |             |             |
|---|-------------|-------------|-------------|
| C | 1.90765200  | 2.29499100  | 1.50407200  |
| C | 1.94210200  | 0.95886500  | 1.91223600  |
| C | 3.16119700  | 0.26989600  | 1.94836200  |
| C | 4.33445100  | 0.91840600  | 1.57239300  |
| C | 4.30836000  | 2.25731700  | 1.17224200  |
| C | 3.09186900  | 2.93832700  | 1.13938600  |
| H | 0.96826500  | 2.83170900  | 1.48065500  |
| H | 3.17561500  | -0.76321800 | 2.27266700  |
| H | 5.22654600  | 2.76478500  | 0.89751800  |
| C | 5.65027400  | 0.18417900  | 1.54654600  |
| F | 5.59825100  | -0.98925600 | 2.20519800  |
| F | 6.63978400  | 0.92203900  | 2.09882700  |
| F | 6.03416500  | -0.08585600 | 0.27427900  |
| C | 3.04372700  | 4.35948500  | 0.64757800  |
| F | 4.20286200  | 5.01187000  | 0.85468600  |
| F | 2.80339000  | 4.41126200  | -0.69615200 |
| F | 2.05886500  | 5.07017800  | 1.23562500  |
| C | 0.71675100  | 0.21986100  | 2.34882500  |
| O | 0.72713300  | -0.90233700 | 2.80260400  |
| O | -0.39638500 | 0.98012400  | 2.16563000  |
| N | -1.56853600 | 0.41430100  | 2.76470300  |
| C | -2.62616600 | 1.03371800  | 2.35977800  |
| C | -3.87829000 | 0.61377500  | 3.04846300  |
| C | -5.12318500 | 0.65112700  | 2.39743400  |
| C | -3.82610900 | 0.16289200  | 4.38117600  |
| C | -6.27986200 | 0.23850600  | 3.06018100  |
| H | -5.20168600 | 0.97990200  | 1.36737200  |
| C | -4.98341700 | -0.24417100 | 5.03963300  |
| H | -2.87152800 | 0.14787800  | 4.89571300  |
| C | -6.21581000 | -0.20853900 | 4.38088300  |
| H | -7.23273600 | 0.26586700  | 2.53934500  |
| H | -4.92505200 | -0.58137800 | 6.07066000  |
| H | -7.11959100 | -0.52240000 | 4.89553800  |
| C | -2.64340500 | 2.14164700  | 1.33151000  |
| C | -2.40267100 | 3.52750900  | 1.98995100  |
| H | -3.61032300 | 2.15442900  | 0.82272900  |
| H | -1.87768200 | 1.95458600  | 0.57421400  |
| C | -2.58122100 | 4.65941000  | 1.01381000  |
| H | -1.39822800 | 3.55708400  | 2.42544200  |
| H | -3.11669300 | 3.65234600  | 2.81541600  |
| C | -1.61496800 | 5.49441400  | 0.61561400  |
| H | -3.59272000 | 4.79458000  | 0.62516700  |
| H | -0.59178100 | 5.40260000  | 0.97457600  |
| H | -1.81828200 | 6.31292400  | -0.07167700 |
| C | 2.93171000  | -1.90917900 | -1.84382300 |
| C | 1.86430200  | -2.20029700 | -0.97366200 |
| C | 2.15545300  | -2.93893300 | 0.19238000  |



## SUPPORTING INFORMATION

|   |             |             |             |
|---|-------------|-------------|-------------|
| C | 3.45986300  | -3.34857700 | 0.46408700  |
| C | 4.51685300  | -3.04536900 | -0.39962600 |
| C | 4.23375000  | -2.31902800 | -1.55476300 |
| H | 2.72633200  | -1.34122300 | -2.74550500 |
| H | 1.35887000  | -3.15797400 | 0.89153000  |
| H | 5.52728800  | -3.35936300 | -0.17294400 |
| C | 3.74042400  | -4.04724400 | 1.76446000  |
| F | 2.75429900  | -4.90624600 | 2.10755700  |
| F | 3.85219700  | -3.16553600 | 2.79750600  |
| F | 4.89450400  | -4.74983400 | 1.73613700  |
| C | 5.33069000  | -1.91507500 | -2.49794700 |
| F | 6.51613700  | -2.48580200 | -2.19822800 |
| F | 5.04125400  | -2.23967800 | -3.78157100 |
| F | 5.52965500  | -0.56779100 | -2.48953400 |
| N | 0.63216400  | -1.62056700 | -1.24328900 |
| C | -0.53790200 | -2.24150600 | -1.15446200 |
| S | -0.79526800 | -3.94254900 | -0.94497100 |
| N | -1.58288400 | -1.33832700 | -1.32219100 |
| C | -2.96931000 | -1.43252200 | -1.36671000 |
| C | -3.75130200 | -2.57432400 | -1.11226900 |
| C | -3.63992700 | -0.23227900 | -1.68714300 |
| C | -5.14413900 | -2.49356700 | -1.17878600 |
| H | -3.26284300 | -3.50872500 | -0.87535000 |
| C | -5.02696100 | -0.17406400 | -1.73526400 |
| H | -3.04881900 | 0.65111300  | -1.89901600 |
| C | -5.80690700 | -1.30464300 | -1.48321600 |
| H | -6.88745500 | -1.26185300 | -1.53176300 |
| C | -5.94974900 | -3.72018700 | -0.84419200 |
| C | -5.66926700 | 1.15595500  | -2.00744200 |
| F | -6.95964100 | 1.04793900  | -2.37889000 |
| F | -5.64667900 | 1.96120400  | -0.90388800 |
| F | -5.02406500 | 1.84763300  | -2.97986700 |
| F | -7.17186300 | -3.70211300 | -1.42463200 |
| F | -5.33615800 | -4.85891300 | -1.23895300 |
| F | -6.15735300 | -3.83716400 | 0.49145400  |
| H | -1.24733100 | -0.37687300 | -1.47162700 |
| H | 0.92703500  | 0.00579000  | -1.74863600 |
| O | 1.27350200  | 0.89337200  | -2.09015100 |
| C | 0.25663600  | 1.80196700  | -2.19412500 |
| K | 3.27328600  | 2.51962600  | -2.87674300 |
| O | -0.90392100 | 1.44604900  | -1.83057000 |
| O | 0.58705900  | 2.93040000  | -2.64744400 |
| K | -1.93468700 | 3.90972200  | -2.42215300 |

### S1

|                                              |                             |
|----------------------------------------------|-----------------------------|
| Zero-point correction=                       | 0.572460 (Hartree/Particle) |
| Thermal correction to Energy=                | 0.638006                    |
| Thermal correction to Enthalpy=              | 0.638950                    |
| Thermal correction to Gibbs Free Energy=     | 0.458989                    |
| Sum of electronic and zero-point Energies=   | -5397.042530                |
| Sum of electronic and thermal Energies=      | -5396.976984                |
| Sum of electronic and thermal Enthalpies=    | -5396.976040                |
| Sum of electronic and thermal Free Energies= | -5397.156001                |

### Cartesian coordinates

|   |            |             |             |
|---|------------|-------------|-------------|
| C | 1.48832400 | 2.23968700  | 1.62616900  |
| C | 1.68427400 | 0.85120500  | 1.93434900  |
| C | 3.02266500 | 0.34350500  | 1.85383500  |
| C | 4.06711800 | 1.16004300  | 1.48152000  |
| C | 3.87461600 | 2.53312100  | 1.16146400  |
| C | 2.55103900 | 3.03651100  | 1.25410900  |
| H | 0.49416700 | 2.65986600  | 1.69397300  |
| H | 3.19209800 | -0.69742600 | 2.09521300  |
| H | 4.71278200 | 3.18290000  | 0.94215300  |
| C | 5.44134300 | 0.60078000  | 1.31114300  |
| F | 5.57352400 | -0.67084700 | 1.73955000  |
| F | 6.38986000 | 1.33664700  | 1.93908500  |
| F | 5.81172700 | 0.59653200  | -0.01786700 |
| C | 2.33786900 | 4.49010100  | 0.97509100  |
| F | 2.76167100 | 5.29112400  | 1.98313600  |
| F | 3.00370000 | 4.90290900  | -0.13643000 |
| F | 1.02320000 | 4.80883300  | 0.77129400  |

## SUPPORTING INFORMATION

|   |             |             |             |
|---|-------------|-------------|-------------|
| C | 0.62808300  | -0.04252800 | 2.29604000  |
| O | 0.72234700  | -1.23632200 | 2.59660400  |
| O | -0.62763900 | 0.61381800  | 2.23551500  |
| N | -1.67620200 | -0.13452200 | 2.78876200  |
| C | -2.82730800 | 0.34160700  | 2.44611400  |
| C | -3.99741700 | -0.33014000 | 3.07529100  |
| C | -5.20377200 | -0.50510700 | 2.37658300  |
| C | -3.90384500 | -0.83133500 | 4.38681300  |
| C | -6.27876300 | -1.17105300 | 2.96677000  |
| H | -5.30277900 | -0.14916100 | 1.35629600  |
| C | -4.98081900 | -1.48932500 | 4.97724800  |
| H | -2.97974000 | -0.69105200 | 4.93767900  |
| C | -6.17375700 | -1.66249700 | 4.26928300  |
| H | -7.19480800 | -1.31310200 | 2.40059400  |
| H | -4.89129600 | -1.86222400 | 5.99401800  |
| H | -7.01398000 | -2.17463200 | 4.73001700  |
| C | -3.01816800 | 1.51937500  | 1.51743200  |
| C | -2.99998400 | 2.86892300  | 2.27964600  |
| H | -3.96787900 | 1.43270700  | 0.98337000  |
| H | -2.21671500 | 1.51529000  | 0.77427600  |
| C | -3.17881300 | 4.04464600  | 1.35678900  |
| H | -2.06385500 | 2.96771300  | 2.84020400  |
| H | -3.81736000 | 2.86135000  | 3.01506800  |
| C | -2.37469000 | 5.11292200  | 1.30573000  |
| H | -4.04440900 | 3.99961600  | 0.69379300  |
| H | -1.49812200 | 5.20077100  | 1.94528500  |
| H | -2.57698700 | 5.94738600  | 0.63757200  |
| C | 3.17527800  | -2.08149400 | -1.88982200 |
| C | 1.86858800  | -2.33864100 | -1.38709600 |
| C | 1.74292500  | -2.99917200 | -0.12896700 |
| C | 2.87807700  | -3.37533700 | 0.56315800  |
| C | 4.16156800  | -3.11906900 | 0.05526100  |
| C | 4.29623800  | -2.46425600 | -1.17337300 |
| H | 3.27198100  | -1.57922000 | -2.84446300 |
| H | 0.76362300  | -3.16859800 | 0.29587900  |
| H | 5.03982900  | -3.41103700 | 0.61789100  |
| C | 2.77611800  | -4.03143000 | 1.91700500  |
| F | 1.51130000  | -4.33494400 | 2.25254800  |
| F | 3.28276300  | -3.23464300 | 2.88691900  |
| F | 3.49449800  | -5.17924000 | 1.95091400  |
| C | 5.66798700  | -2.21041100 | -1.74586800 |
| F | 6.60327100  | -2.10478500 | -0.78228900 |
| F | 6.05501200  | -3.20777100 | -2.57170600 |
| F | 5.69913200  | -1.06816200 | -2.47534400 |
| N | 0.83970900  | -1.85322900 | -2.11573500 |
| C | -0.48362000 | -2.21529200 | -1.96166500 |
| S | -0.91216100 | -3.84819000 | -2.08075000 |
| N | -1.29642100 | -1.14070600 | -1.90592900 |
| C | -2.69743900 | -1.00605800 | -1.89311600 |
| C | -3.61331300 | -2.03137400 | -1.62542200 |
| C | -3.17226900 | 0.29502900  | -2.13435000 |
| C | -4.98039600 | -1.74275500 | -1.61608400 |
| H | -3.26956100 | -3.03661900 | -1.43277000 |
| C | -4.53528400 | 0.56196400  | -2.10539500 |
| H | -2.46142000 | 1.08503500  | -2.34465100 |
| C | -5.45823700 | -0.45609600 | -1.85624100 |
| H | -6.52258200 | -0.25073800 | -1.85237200 |
| C | -5.96595700 | -2.82836700 | -1.26878800 |
| C | -5.02706000 | 1.97469000  | -2.26999200 |
| F | -6.12389100 | 2.04069900  | -3.05282900 |
| F | -5.37553700 | 2.51544300  | -1.07099200 |
| F | -4.09217100 | 2.78990200  | -2.80693900 |
| F | -7.10682100 | -2.71486100 | -1.98519400 |
| F | -5.46893500 | -4.06293200 | -1.48977600 |
| F | -6.32197200 | -2.77346700 | 0.03857200  |
| H | -0.79714100 | -0.22930000 | -1.95507800 |
| H | 1.34376200  | -0.15698700 | -2.90357400 |
| O | 1.79999000  | 0.70866400  | -3.01923500 |
| C | 0.99614600  | 1.71441400  | -2.52108500 |
| K | 4.07558100  | 1.98600100  | -1.97199300 |
| O | -0.16551000 | 1.40430300  | -2.12600200 |
| O | 1.52553400  | 2.84937700  | -2.49747500 |

## SUPPORTING INFORMATION

K -0.70292100 3.99843800 -1.37667400

### int4

Zero-point correction= 0.227521 (Hartree/Particle)  
 Thermal correction to Energy= 0.255837  
 Thermal correction to Enthalpy= 0.256782  
 Thermal correction to Gibbs Free Energy= 0.157830  
 Sum of electronic and zero-point Energies= -2357.591691  
 Sum of electronic and thermal Energies= -2357.563375  
 Sum of electronic and thermal Enthalpies= -2357.562431  
 Sum of electronic and thermal Free Energies= -2357.661382

### Cartesian coordinates

|   |             |             |             |
|---|-------------|-------------|-------------|
| C | 3.59728700  | -0.84526100 | -1.26191300 |
| C | 2.43378700  | -0.54276200 | -0.50296000 |
| C | 2.57183200  | 0.25566000  | 0.66881600  |
| C | 3.82176600  | 0.71581000  | 1.04662200  |
| C | 4.96516400  | 0.40225900  | 0.29669200  |
| C | 4.83884000  | -0.38067800 | -0.85729200 |
| H | 3.48495700  | -1.44442800 | -2.15780700 |
| H | 1.69602900  | 0.50217200  | 1.25578700  |
| H | 5.93759300  | 0.76764200  | 0.60600800  |
| C | 3.96729000  | 1.61537200  | 2.24888800  |
| F | 2.91697800  | 1.51484300  | 3.08802100  |
| F | 4.06420300  | 2.91418900  | 1.88288100  |
| F | 5.08318600  | 1.32258200  | 2.95172900  |
| C | 6.07654400  | -0.75925300 | -1.63142600 |
| F | 6.99472100  | 0.23113700  | -1.61476200 |
| F | 6.67099700  | -1.85530800 | -1.10699700 |
| F | 5.79807700  | -1.03752000 | -2.92149900 |
| N | 1.25477600  | -0.98912400 | -0.99230400 |
| C | 0.06899000  | -1.00916200 | -0.31417600 |
| S | -0.07327600 | -1.96183700 | 1.07634000  |
| N | -0.92214200 | -0.33801500 | -0.95270300 |
| C | -2.29354400 | -0.19721300 | -0.63980200 |
| C | -3.05607700 | -1.22242000 | -0.06948100 |
| C | -2.90578800 | 1.01444500  | -0.98539000 |
| C | -4.41432400 | -1.01183100 | 0.17263700  |
| H | -2.60164500 | -2.17387200 | 0.16581000  |
| C | -4.26541800 | 1.20057800  | -0.74767500 |
| H | -2.32080500 | 1.80653300  | -1.44108000 |
| C | -5.03105000 | 0.19315000  | -0.15968900 |
| H | -6.08929300 | 0.33923500  | 0.01916600  |
| C | -5.21549200 | -2.10113800 | 0.83793000  |
| C | -4.90112800 | 2.52678000  | -1.07426300 |
| F | -6.20752700 | 2.39278800  | -1.38877800 |
| F | -4.83522700 | 3.38141700  | -0.02609700 |
| F | -4.29171200 | 3.13550700  | -2.11475400 |
| F | -6.52215800 | -2.04261700 | 0.50171100  |
| F | -4.76548200 | -3.33139200 | 0.50754100  |
| F | -5.15230500 | -2.01049000 | 2.18749500  |
| H | -0.59868900 | 0.21984900  | -1.73778500 |

### int5

Zero-point correction= 0.313032 (Hartree/Particle)  
 Thermal correction to Energy= 0.339527  
 Thermal correction to Enthalpy= 0.340471  
 Thermal correction to Gibbs Free Energy= 0.250650  
 Sum of electronic and zero-point Energies= -1575.149078  
 Sum of electronic and thermal Energies= -1575.122582  
 Sum of electronic and thermal Enthalpies= -1575.121638  
 Sum of electronic and thermal Free Energies= -1575.211460

### Cartesian coordinates

|   |            |             |             |
|---|------------|-------------|-------------|
| C | 1.41105200 | 0.46939300  | -0.22739600 |
| C | 1.20781600 | -0.94551300 | -0.11857200 |
| C | 2.37803400 | -1.76180600 | 0.01304700  |
| C | 3.63701100 | -1.20166900 | 0.05365800  |
| C | 3.83370900 | 0.20133800  | -0.03454100 |
| C | 2.68536900 | 1.00799800  | -0.18115800 |
| H | 0.55707100 | 1.12443500  | -0.34791200 |
| H | 2.25013300 | -2.83531300 | 0.08619100  |

## SUPPORTING INFORMATION

|   |             |             |             |
|---|-------------|-------------|-------------|
| H | 4.82561800  | 0.63318300  | -0.00016600 |
| C | 4.84993300  | -2.06884300 | 0.17695800  |
| F | 4.56122100  | -3.38170300 | 0.33105400  |
| F | 5.62648100  | -1.71321000 | 1.23704600  |
| F | 5.65935600  | -1.97561300 | -0.91456900 |
| C | 2.82776000  | 2.49982400  | -0.21247700 |
| F | 4.06803400  | 2.90181100  | -0.58128100 |
| F | 1.95328400  | 3.09241000  | -1.06458700 |
| F | 2.59395200  | 3.06683800  | 1.00743300  |
| C | -0.07468900 | -1.57900200 | -0.12215200 |
| O | -0.32547300 | -2.78776300 | -0.02514500 |
| O | -1.10286200 | -0.61181900 | -0.25376000 |
| N | -2.38954400 | -1.11964200 | -0.11703700 |
| C | -3.28553600 | -0.19224600 | -0.27587700 |
| C | -4.69459200 | -0.63177500 | -0.13517400 |
| C | -5.73918800 | 0.29826800  | 0.02339800  |
| C | -5.02807600 | -2.00323500 | -0.14349700 |
| C | -7.06209600 | -0.12391100 | 0.16846700  |
| H | -5.52607600 | 1.36190800  | 0.04789800  |
| C | -6.34710000 | -2.42075600 | -0.00095100 |
| H | -4.23521500 | -2.73219200 | -0.26904400 |
| C | -7.37532700 | -1.48359600 | 0.15567100  |
| H | -7.84794100 | 0.61640000  | 0.29314100  |
| H | -6.57751100 | -3.48293700 | -0.01739700 |
| H | -8.40550400 | -1.81140700 | 0.26406700  |
| C | -2.93987600 | 1.25199700  | -0.56789300 |
| C | -2.54219700 | 2.05115100  | 0.70178000  |
| H | -3.77821000 | 1.74686400  | -1.06752700 |
| H | -2.09658800 | 1.26780000  | -1.26500100 |
| C | -2.16140800 | 3.47024200  | 0.37701200  |
| H | -1.70959300 | 1.54306100  | 1.19917600  |
| H | -3.39017000 | 2.04619800  | 1.40147900  |
| C | -0.95546300 | 4.00815700  | 0.57381200  |
| H | -2.94796300 | 4.08187400  | -0.06961000 |
| H | -0.13394800 | 3.44329100  | 1.00929600  |
| H | -0.74235500 | 5.04010700  | 0.30535900  |

$K_2CO_3 \cdot H^+$

|                                              |                             |
|----------------------------------------------|-----------------------------|
| Zero-point correction=                       | 0.027829 (Hartree/Particle) |
| Thermal correction to Energy=                | 0.035667                    |
| Thermal correction to Enthalpy=              | 0.036611                    |
| Thermal correction to Gibbs Free Energy=     | -0.007846                   |
| Sum of electronic and zero-point Energies=   | -1464.245528                |
| Sum of electronic and thermal Energies=      | -1464.237689                |
| Sum of electronic and thermal Enthalpies=    | -1464.236745                |
| Sum of electronic and thermal Free Energies= | -1464.281203                |

Cartesian coordinates

|   |             |             |             |
|---|-------------|-------------|-------------|
| H | 0.89993600  | 2.45877000  | -0.00064100 |
| C | -0.10729700 | 0.82326100  | 0.00015400  |
| O | 1.11318300  | 1.51062600  | 0.00057200  |
| O | -1.15034500 | 1.51023800  | -0.00065100 |
| O | 0.02194100  | -0.42973600 | 0.00079500  |
| K | 2.69055500  | -0.75251300 | -0.00026100 |
| K | -2.69762700 | -0.72787400 | -0.00005500 |

**ts2**

|                                              |                             |
|----------------------------------------------|-----------------------------|
| Zero-point correction=                       | 0.311001 (Hartree/Particle) |
| Thermal correction to Energy=                | 0.337527                    |
| Thermal correction to Enthalpy=              | 0.338471                    |
| Thermal correction to Gibbs Free Energy=     | 0.247002                    |
| Sum of electronic and zero-point Energies=   | -1575.135755                |
| Sum of electronic and thermal Energies=      | -1575.109230                |
| Sum of electronic and thermal Enthalpies=    | -1575.108285                |
| Sum of electronic and thermal Free Energies= | -1575.199755                |

Cartesian coordinates

|   |            |             |             |
|---|------------|-------------|-------------|
| C | 1.40316000 | 0.48363000  | 0.11475100  |
| C | 1.27940800 | -0.87097100 | -0.27997100 |
| C | 2.46329600 | -1.65132900 | -0.33085500 |
| C | 3.69640900 | -1.09551500 | -0.01339900 |
| C | 3.81339600 | 0.24784400  | 0.37376600  |

## SUPPORTING INFORMATION

|   |             |             |             |
|---|-------------|-------------|-------------|
| C | 2.63971000  | 1.02394500  | 0.43388500  |
| H | 0.51292100  | 1.09752100  | 0.15943200  |
| H | 2.38101500  | -2.69181800 | -0.62186600 |
| H | 4.77808300  | 0.67643700  | 0.61805200  |
| C | 4.94409000  | -1.92019300 | -0.14423500 |
| F | 4.70481600  | -3.24865400 | -0.05177100 |
| F | 5.86109800  | -1.61544600 | 0.80758500  |
| F | 5.56207900  | -1.72329300 | -1.33929200 |
| C | 2.74493200  | 2.44435500  | 0.90186000  |
| F | 3.79757100  | 3.08875000  | 0.33794400  |
| F | 1.63917600  | 3.17703400  | 0.62252100  |
| F | 2.93088300  | 2.52997500  | 2.24591900  |
| C | 0.00486000  | -1.46968200 | -0.68231700 |
| O | -0.13318000 | -2.69314500 | -0.90220200 |
| O | -0.98583600 | -0.57235300 | -0.81541300 |
| N | -2.34383200 | -1.01520500 | 0.05190700  |
| C | -3.33529900 | -0.31329200 | -0.36535000 |
| C | -4.67726600 | -0.73445400 | 0.13073800  |
| C | -5.72287700 | 0.19550300  | 0.28544700  |
| C | -4.92002300 | -2.07519100 | 0.49103700  |
| C | -6.96316000 | -0.20074100 | 0.78866600  |
| H | -5.56902500 | 1.23746800  | 0.02207700  |
| C | -6.16033700 | -2.46884000 | 0.98465400  |
| H | -4.12278800 | -2.80101900 | 0.36769800  |
| C | -7.18998600 | -1.53289300 | 1.13972700  |
| H | -7.75403100 | 0.53587500  | 0.90419900  |
| H | -6.32898000 | -3.51084600 | 1.24420000  |
| H | -8.15771600 | -1.84115100 | 1.52575400  |
| C | -3.20906800 | 0.90588200  | -1.26494500 |
| C | -2.70223200 | 2.15647200  | -0.50226700 |
| H | -4.17106500 | 1.12251900  | -1.74065300 |
| H | -2.49262200 | 0.66357000  | -2.05373700 |
| C | -2.47383000 | 3.33042600  | -1.41488600 |
| H | -1.77482800 | 1.90023000  | 0.01944000  |
| H | -3.44005300 | 2.42683000  | 0.26734500  |
| C | -1.30369500 | 3.94969200  | -1.58763400 |
| H | -3.34556000 | 3.67679000  | -1.97376300 |
| H | -0.40716300 | 3.64245600  | -1.05197200 |
| H | -1.19876200 | 4.79234800  | -2.26682200 |

### <sup>-</sup>OBzd<sup>CF3</sup>

|                                              |                             |
|----------------------------------------------|-----------------------------|
| Zero-point correction=                       | 0.111469 (Hartree/Particle) |
| Thermal correction to Energy=                | 0.125814                    |
| Thermal correction to Enthalpy=              | 0.126758                    |
| Thermal correction to Gibbs Free Energy=     | 0.065748                    |
| Sum of electronic and zero-point Energies=   | -1094.315124                |
| Sum of electronic and thermal Energies=      | -1094.300778                |
| Sum of electronic and thermal Enthalpies=    | -1094.299834                |
| Sum of electronic and thermal Free Energies= | -1094.360845                |

### Cartesian coordinates

|   |             |             |             |
|---|-------------|-------------|-------------|
| C | 1.20187600  | 0.97290900  | -0.02215500 |
| C | -0.00003400 | 1.68525100  | -0.01159400 |
| C | -1.20190100 | 0.97288100  | -0.02201800 |
| C | -1.20283500 | -0.42407500 | -0.04143600 |
| C | 0.00002000  | -1.13287000 | -0.05014100 |
| C | 1.20287300  | -0.42402000 | -0.04153100 |
| H | 2.12890300  | 1.53564300  | -0.02303500 |
| H | -2.12900200 | 1.53549700  | -0.02277800 |
| H | 0.00005200  | -2.21605400 | -0.07547600 |
| C | -2.50820500 | -1.16746500 | -0.00069100 |
| F | -3.47742900 | -0.53098100 | -0.69823900 |
| F | -2.97431100 | -1.30261900 | 1.26719000  |
| F | -2.40452500 | -2.41765900 | -0.50843900 |
| C | 2.50822200  | -1.16743800 | -0.00063400 |
| F | 2.40475700  | -2.41733800 | -0.50916900 |
| F | 3.47778100  | -0.53053900 | -0.69735600 |
| F | 2.97374500  | -1.30336500 | 1.26736500  |
| C | -0.00001800 | 3.22772400  | 0.00326600  |
| O | -1.13288800 | 3.77563600  | 0.00971900  |
| O | 1.13287500  | 3.77561900  | 0.00912300  |

## SUPPORTING INFORMATION

### int6

|                                              |                             |
|----------------------------------------------|-----------------------------|
| Zero-point correction=                       | 0.199980 (Hartree/Particle) |
| Thermal correction to Energy=                | 0.211384                    |
| Thermal correction to Enthalpy=              | 0.212328                    |
| Thermal correction to Gibbs Free Energy=     | 0.160308                    |
| Sum of electronic and zero-point Energies=   | -480.874636                 |
| Sum of electronic and thermal Energies=      | -480.863232                 |
| Sum of electronic and thermal Enthalpies=    | -480.862288                 |
| Sum of electronic and thermal Free Energies= | -480.914308                 |

### Cartesian coordinates

|   |             |             |             |
|---|-------------|-------------|-------------|
| N | 0.14479100  | 2.49782300  | 0.36775100  |
| C | 0.18889500  | 1.23790700  | 0.43275800  |
| C | -1.03379900 | 0.40778700  | 0.18100000  |
| C | -1.15955300 | -0.88954100 | 0.70057800  |
| C | -2.09177200 | 0.94554700  | -0.57266800 |
| C | -2.32147100 | -1.63009000 | 0.47532400  |
| H | -0.36038400 | -1.32592100 | 1.29082700  |
| C | -3.24832300 | 0.20329000  | -0.79772600 |
| H | -1.99383200 | 1.94422600  | -0.98694100 |
| C | -3.36720300 | -1.08764600 | -0.27348600 |
| H | -2.40635500 | -2.63200400 | 0.88631600  |
| H | -4.05577400 | 0.62952000  | -1.38637900 |
| H | -4.26844700 | -1.66757200 | -0.45117800 |
| C | 1.52773500  | 0.57035600  | 0.75975300  |
| C | 2.09858400  | -0.23501300 | -0.43043900 |
| H | 1.39721500  | -0.08242400 | 1.63165400  |
| H | 2.23618400  | 1.35173100  | 1.04902400  |
| C | 3.39401800  | -0.91246500 | -0.07202400 |
| H | 2.24867600  | 0.43694400  | -1.28364600 |
| H | 1.36149800  | -0.98823400 | -0.73927800 |
| C | 4.57012000  | -0.67115700 | -0.65413400 |
| H | 3.33819000  | -1.64677700 | 0.73353900  |
| H | 4.67109600  | 0.05431100  | -1.45936900 |
| H | 5.47501400  | -1.19240700 | -0.35243500 |

### ts3

|                                              |                             |
|----------------------------------------------|-----------------------------|
| Zero-point correction=                       | 0.199126 (Hartree/Particle) |
| Thermal correction to Energy=                | 0.209444                    |
| Thermal correction to Enthalpy=              | 0.210388                    |
| Thermal correction to Gibbs Free Energy=     | 0.161849                    |
| Sum of electronic and zero-point Energies=   | -480.859405                 |
| Sum of electronic and thermal Energies=      | -480.849087                 |
| Sum of electronic and thermal Enthalpies=    | -480.848143                 |
| Sum of electronic and thermal Free Energies= | -480.896682                 |

### Cartesian coordinates

|   |             |             |             |
|---|-------------|-------------|-------------|
| N | 1.23782100  | -0.99138000 | -0.31301200 |
| C | 0.55004500  | 0.05610900  | -0.10032800 |
| C | -0.94393300 | -0.01868700 | -0.03337100 |
| C | -1.73288400 | 1.13927800  | -0.11414000 |
| C | -1.58256300 | -1.26438600 | 0.09918200  |
| C | -3.12618600 | 1.05337500  | -0.06752500 |
| H | -1.26594300 | 2.11299000  | -0.22237700 |
| C | -2.97120300 | -1.34786600 | 0.15102200  |
| H | -0.97473100 | -2.16107400 | 0.16621800  |
| C | -3.74926700 | -0.18804900 | 0.06682300  |
| H | -3.72241000 | 1.95916700  | -0.13502400 |
| H | -3.44923800 | -2.31762000 | 0.25982700  |
| H | -4.83300900 | -0.25351500 | 0.10816200  |
| C | 1.25980900  | 1.39939500  | 0.03978500  |
| C | 2.72310100  | 1.07631200  | 0.35706800  |
| H | 0.79939900  | 2.03098700  | 0.80653800  |
| H | 1.16924300  | 1.94055300  | -0.91269400 |
| C | 3.13946600  | -0.18069500 | -0.37279800 |
| H | 2.84717000  | 0.92144600  | 1.43543500  |
| H | 3.37094300  | 1.91489500  | 0.07257100  |
| C | 4.03102400  | -1.07871900 | 0.18014700  |
| H | 3.09376000  | -0.13299500 | -1.46059400 |
| H | 4.25135000  | -1.06857900 | 1.24488900  |
| H | 4.46426300  | -1.88300100 | -0.40706300 |

## SUPPORTING INFORMATION

### int7

|                                              |                             |
|----------------------------------------------|-----------------------------|
| Zero-point correction=                       | 0.200144 (Hartree/Particle) |
| Thermal correction to Energy=                | 0.210851                    |
| Thermal correction to Enthalpy=              | 0.211795                    |
| Thermal correction to Gibbs Free Energy=     | 0.162664                    |
| Sum of electronic and zero-point Energies=   | -480.884992                 |
| Sum of electronic and thermal Energies=      | -480.874285                 |
| Sum of electronic and thermal Enthalpies=    | -480.873341                 |
| Sum of electronic and thermal Free Energies= | -480.922472                 |

### Cartesian coordinates

|   |             |             |             |
|---|-------------|-------------|-------------|
| N | -1.36773800 | -0.82685600 | 0.27443300  |
| C | -0.59084600 | 0.18394300  | 0.11136900  |
| C | 0.87967100  | 0.03529100  | 0.04113900  |
| C | 1.71739900  | 1.16006800  | -0.02909400 |
| C | 1.46594000  | -1.24382600 | 0.04790800  |
| C | 3.10450800  | 1.01176500  | -0.08953800 |
| H | 1.28904600  | 2.15756000  | -0.03164600 |
| C | 2.84815300  | -1.39091600 | -0.01614600 |
| H | 0.81845000  | -2.11274400 | 0.10295400  |
| C | 3.67372500  | -0.26249900 | -0.08475100 |
| H | 3.73826600  | 1.89273400  | -0.14102900 |
| H | 3.28594600  | -2.38549400 | -0.01269700 |
| H | 4.75295200  | -0.37845200 | -0.13424400 |
| C | -1.29521700 | 1.53304000  | 0.03963600  |
| C | -2.75611500 | 1.10661400  | -0.17745900 |
| H | -0.90788300 | 2.17652700  | -0.75675000 |
| H | -1.15645300 | 2.07373800  | 0.98644200  |
| C | -2.77257900 | -0.36716100 | 0.35242300  |
| H | -2.99722200 | 1.11294200  | -1.24609400 |
| H | -3.48243700 | 1.74129900  | 0.33662900  |
| C | -3.70468600 | -1.27651400 | -0.37036100 |
| H | -3.04621800 | -0.35526400 | 1.42021000  |
| H | -3.37987700 | -1.77767900 | -1.27727700 |
| H | -4.76012400 | -1.29601400 | -0.11829100 |

### ts3'

|                                              |                             |
|----------------------------------------------|-----------------------------|
| Zero-point correction=                       | 0.199871 (Hartree/Particle) |
| Thermal correction to Energy=                | 0.209919                    |
| Thermal correction to Enthalpy=              | 0.210863                    |
| Thermal correction to Gibbs Free Energy=     | 0.163153                    |
| Sum of electronic and zero-point Energies=   | -480.850653                 |
| Sum of electronic and thermal Energies=      | -480.840605                 |
| Sum of electronic and thermal Enthalpies=    | -480.839661                 |
| Sum of electronic and thermal Free Energies= | -480.887371                 |

### Cartesian coordinates

|   |             |             |             |
|---|-------------|-------------|-------------|
| N | 1.17076200  | -1.19790700 | -0.57711600 |
| C | 0.63947300  | -0.08429600 | -0.26210300 |
| C | -0.85529500 | -0.04443900 | -0.10050800 |
| C | -1.59653500 | 1.10650900  | -0.41186300 |
| C | -1.54071800 | -1.19081000 | 0.33691400  |
| C | -2.98776200 | 1.10916600  | -0.29105900 |
| H | -1.09411500 | 2.00096400  | -0.76739800 |
| C | -2.92790100 | -1.18337000 | 0.46729400  |
| H | -0.97034900 | -2.08102400 | 0.58249100  |
| C | -3.65748700 | -0.03275700 | 0.15223600  |
| H | -3.54662900 | 2.00620400  | -0.54345500 |
| H | -3.44088700 | -2.07453100 | 0.81888300  |
| H | -4.73917600 | -0.02653300 | 0.25434200  |
| C | 1.43413100  | 1.21864100  | -0.06945200 |
| C | 2.66586200  | 1.02758100  | 0.84142200  |
| H | 0.79491900  | 2.00202900  | 0.34407800  |
| H | 1.75385000  | 1.56636900  | -1.06062300 |
| C | 3.41731200  | -0.23089200 | 0.51071100  |
| H | 2.33793600  | 0.97816600  | 1.88815300  |
| H | 3.30050700  | 1.92539400  | 0.77305700  |
| C | 3.22256300  | -0.86102400 | -0.69266000 |
| H | 3.88975700  | -0.77125800 | 1.32816300  |
| H | 3.63882800  | -1.84862400 | -0.86953900 |
| H | 2.99817200  | -0.29765900 | -1.59394000 |

## SUPPORTING INFORMATION

### int7'

|                                              |                             |
|----------------------------------------------|-----------------------------|
| Zero-point correction=                       | 0.201424 (Hartree/Particle) |
| Thermal correction to Energy=                | 0.211675                    |
| Thermal correction to Enthalpy=              | 0.212619                    |
| Thermal correction to Gibbs Free Energy=     | 0.164378                    |
| Sum of electronic and zero-point Energies=   | -480.885497                 |
| Sum of electronic and thermal Energies=      | -480.875245                 |
| Sum of electronic and thermal Enthalpies=    | -480.874301                 |
| Sum of electronic and thermal Free Energies= | -480.922542                 |

### Cartesian coordinates

|   |             |             |             |
|---|-------------|-------------|-------------|
| N | -1.23395000 | 1.18762900  | -0.18119700 |
| C | -0.67140600 | 0.04019100  | -0.06665000 |
| C | 0.82538800  | 0.01234800  | -0.02303000 |
| C | 1.54460900  | 1.19546100  | 0.22500300  |
| C | 1.54822200  | -1.17186600 | -0.24254300 |
| C | 2.93627100  | 1.19332500  | 0.25820900  |
| H | 0.98894400  | 2.11171000  | 0.39308900  |
| C | 2.94501700  | -1.17281900 | -0.21902400 |
| H | 1.02776300  | -2.10159600 | -0.44842800 |
| C | 3.64445600  | 0.00741100  | 0.03480900  |
| H | 3.47213700  | 2.11704900  | 0.46057400  |
| H | 3.48400100  | -2.09901100 | -0.39926300 |
| H | 4.73079700  | 0.00540800  | 0.06004300  |
| C | -1.41235200 | -1.28858400 | 0.01262300  |
| C | -2.85744500 | -1.11850500 | 0.51483200  |
| H | -0.86763900 | -1.97902500 | 0.66466400  |
| H | -1.41747500 | -1.74597700 | -0.98693000 |
| C | -3.49212600 | 0.06181300  | -0.13317500 |
| H | -2.82890600 | -0.98802300 | 1.61337400  |
| H | -3.43160000 | -2.03456200 | 0.33615600  |
| C | -2.68780700 | 1.31091800  | -0.26541600 |
| H | -4.56673800 | 0.11032300  | -0.28623600 |
| H | -2.97970900 | 2.05126300  | 0.50438300  |
| H | -2.91088900 | 1.82088100  | -1.21687900 |

### 2a

|                                              |                             |
|----------------------------------------------|-----------------------------|
| Zero-point correction=                       | 0.325298 (Hartree/Particle) |
| Thermal correction to Energy=                | 0.344872                    |
| Thermal correction to Enthalpy=              | 0.345816                    |
| Thermal correction to Gibbs Free Energy=     | 0.275543                    |
| Sum of electronic and zero-point Energies=   | -911.194188                 |
| Sum of electronic and thermal Energies=      | -911.174615                 |
| Sum of electronic and thermal Enthalpies=    | -911.173671                 |
| Sum of electronic and thermal Free Energies= | -911.243943                 |

### Cartesian coordinates

|    |             |             |             |
|----|-------------|-------------|-------------|
| C  | -1.00265500 | -1.09587600 | -0.14676300 |
| C  | -0.96544900 | -2.43212500 | -0.29497300 |
| H  | -1.87977300 | -3.00508600 | -0.38432000 |
| H  | -0.03527400 | -2.98435400 | -0.35035300 |
| C  | -2.26632900 | -0.31315600 | -0.06147800 |
| C  | -2.27675600 | 1.05197900  | -0.39323900 |
| C  | -3.47203800 | -0.90880300 | 0.34950200  |
| C  | -3.45869300 | 1.79187900  | -0.33841100 |
| H  | -1.35294300 | 1.52821400  | -0.70197200 |
| C  | -4.65186100 | -0.16892500 | 0.40423000  |
| H  | -3.48444400 | -1.95190700 | 0.64994700  |
| C  | -4.65218600 | 1.18541700  | 0.05790400  |
| H  | -3.44524300 | 2.84514200  | -0.60615900 |
| H  | -5.57091900 | -0.64878200 | 0.72983400  |
| H  | -5.57171500 | 1.76235000  | 0.10488800  |
| O  | 0.10599600  | -0.29926200 | -0.08456800 |
| Si | 1.77358600  | -0.64981300 | -0.02075200 |
| C  | 2.30985200  | -1.53519300 | -1.59925600 |
| H  | 1.89879200  | -2.54827000 | -1.66228700 |
| H  | 1.98947900  | -0.98861400 | -2.49330100 |
| H  | 3.40258800  | -1.62162800 | -1.63503500 |
| C  | 2.13321000  | -1.70932900 | 1.49845800  |
| H  | 1.59868300  | -2.66450200 | 1.46031200  |
| H  | 3.20458900  | -1.93287400 | 1.56629900  |
| H  | 1.83848800  | -1.19940400 | 2.42251200  |



## SUPPORTING INFORMATION

|   |            |            |             |
|---|------------|------------|-------------|
| C | 2.01890900 | 1.82689400 | 1.35092200  |
| H | 2.47564800 | 2.82429100 | 1.42777700  |
| H | 0.93331200 | 1.96136200 | 1.28950300  |
| H | 2.23938400 | 1.29478700 | 2.28434800  |
| C | 2.27076000 | 1.91137700 | -1.14925800 |
| H | 1.19354100 | 2.04789300 | -1.29963600 |
| H | 2.72239500 | 2.91049100 | -1.06484300 |
| H | 2.67928000 | 1.44380900 | -2.05320800 |
| C | 4.10369400 | 0.93144800 | 0.26614600  |
| H | 4.55516900 | 0.42265200 | -0.59443600 |
| H | 4.57416800 | 1.92228600 | 0.34162300  |
| H | 4.37717900 | 0.37171100 | 1.16877100  |
| C | 2.57278200 | 1.08139900 | 0.11735000  |

### ts4

|                                              |                             |
|----------------------------------------------|-----------------------------|
| Zero-point correction=                       | 0.527259 (Hartree/Particle) |
| Thermal correction to Energy=                | 0.558125                    |
| Thermal correction to Enthalpy=              | 0.559070                    |
| Thermal correction to Gibbs Free Energy=     | 0.460307                    |
| Sum of electronic and zero-point Energies=   | -1392.072156                |
| Sum of electronic and thermal Energies=      | -1392.041290                |
| Sum of electronic and thermal Enthalpies=    | -1392.040346                |
| Sum of electronic and thermal Free Energies= | -1392.139108                |

### Cartesian coordinates

|    |             |             |             |
|----|-------------|-------------|-------------|
| N  | -2.50265400 | -0.92612800 | 1.25502600  |
| C  | -3.48627500 | -1.25047100 | 0.49407200  |
| C  | -4.39116300 | -0.23807200 | -0.09583600 |
| C  | -4.16986200 | 1.13394200  | 0.12520900  |
| C  | -5.49046700 | -0.62407500 | -0.88000400 |
| C  | -5.01996200 | 2.08792700  | -0.42612800 |
| H  | -3.32429200 | 1.43523400  | 0.73446000  |
| C  | -6.34464300 | 0.33359600  | -1.43037800 |
| H  | -5.68633600 | -1.67621900 | -1.06135600 |
| C  | -6.11184000 | 1.69129900  | -1.20697300 |
| H  | -4.83437900 | 3.14365300  | -0.24743400 |
| H  | -7.19104100 | 0.01664200  | -2.03335600 |
| H  | -6.77531100 | 2.43706100  | -1.63623500 |
| C  | -3.67093800 | -2.74925500 | 0.28616100  |
| C  | -2.34863400 | -3.30755100 | 0.84016600  |
| H  | -3.84999400 | -3.01413600 | -0.76079400 |
| H  | -4.54326300 | -3.09702200 | 0.85699100  |
| C  | -1.82378600 | -2.15384100 | 1.73362200  |
| H  | -1.64298900 | -3.49338000 | 0.02304800  |
| H  | -2.47245600 | -4.24248500 | 1.39338100  |
| C  | -0.33542400 | -2.00330800 | 1.79579700  |
| H  | -2.19709900 | -2.30733400 | 2.76690500  |
| H  | 0.06227500  | -1.15005400 | 2.33752800  |
| H  | 0.25965100  | -2.91172600 | 1.84383300  |
| C  | 0.45907600  | -1.20493600 | -0.39958900 |
| C  | 1.76171000  | -0.81619000 | -0.28528500 |
| H  | 0.21510700  | -2.16567000 | -0.83193100 |
| C  | 2.91506600  | -1.72031700 | -0.46404200 |
| O  | 2.12407400  | 0.45401700  | 0.07764600  |
| C  | 4.22631400  | -1.20607200 | -0.49038600 |
| C  | 2.75282200  | -3.11442900 | -0.60871700 |
| Si | 1.29534700  | 1.94216200  | 0.04857000  |
| C  | 5.32526000  | -2.04573400 | -0.67038600 |
| H  | 4.37512800  | -0.13942300 | -0.37021200 |
| C  | 3.85187300  | -3.94977500 | -0.78984500 |
| H  | 1.76187800  | -3.55421800 | -0.56428300 |
| C  | 0.04602600  | 2.01002400  | 1.45976600  |
| C  | 0.43614900  | 2.16826800  | -1.61771900 |
| C  | 2.69187300  | 3.22740800  | 0.29400500  |
| C  | 5.14695600  | -3.42213800 | -0.82411800 |
| H  | 6.32555900  | -1.62061700 | -0.69031000 |
| H  | 3.69702500  | -5.02029100 | -0.89668300 |
| H  | -0.70631000 | 1.21731900  | 1.37687600  |
| H  | 0.53730600  | 1.90437600  | 2.43422200  |
| H  | -0.48070700 | 2.97246200  | 1.45690800  |
| H  | -0.42596700 | 1.50262300  | -1.73027700 |
| H  | 0.07152600  | 3.19775900  | -1.71867700 |

## SUPPORTING INFORMATION

|   |             |             |             |
|---|-------------|-------------|-------------|
| H | 1.12042500  | 1.97427100  | -2.45134000 |
| C | 3.65019000  | 3.21556200  | -0.91654700 |
| C | 3.49358900  | 2.90617300  | 1.57379800  |
| C | 2.07516600  | 4.63790400  | 0.42926600  |
| H | 6.00311100  | -4.07648300 | -0.96306500 |
| H | 4.46021100  | 3.94439800  | -0.76757200 |
| H | 4.11383600  | 2.23284100  | -1.06121300 |
| H | 3.13682900  | 3.48364400  | -1.84779800 |
| H | 3.96327100  | 1.91782000  | 1.52023400  |
| H | 4.29234700  | 3.64832700  | 1.71807400  |
| H | 2.86144000  | 2.92915700  | 2.46995400  |
| H | 1.41266100  | 4.71598300  | 1.29957100  |
| H | 2.87003300  | 5.38707700  | 0.55556200  |
| H | 1.49806500  | 4.92418200  | -0.45882700 |
| H | -0.35086200 | -0.49091900 | -0.33796100 |

### int8

|                                              |                             |
|----------------------------------------------|-----------------------------|
| Zero-point correction=                       | 0.532772 (Hartree/Particle) |
| Thermal correction to Energy=                | 0.563008                    |
| Thermal correction to Enthalpy=              | 0.563952                    |
| Thermal correction to Gibbs Free Energy=     | 0.467511                    |
| Sum of electronic and zero-point Energies=   | -1392.127697                |
| Sum of electronic and thermal Energies=      | -1392.097462                |
| Sum of electronic and thermal Enthalpies=    | -1392.096517                |
| Sum of electronic and thermal Free Energies= | -1392.192959                |

### Cartesian coordinates

|    |             |             |             |
|----|-------------|-------------|-------------|
| N  | -2.44186100 | 0.72812600  | -1.10065500 |
| C  | -3.48418000 | 1.14922800  | -0.47725000 |
| C  | -4.51108800 | 0.22568000  | 0.05371400  |
| C  | -4.33899400 | -1.16736700 | -0.04565900 |
| C  | -5.67805600 | 0.71797100  | 0.66067500  |
| C  | -5.30389100 | -2.03878800 | 0.45046300  |
| H  | -3.43951300 | -1.55011000 | -0.51627700 |
| C  | -6.64721700 | -0.15701100 | 1.15522900  |
| H  | -5.83654000 | 1.78847900  | 0.74581300  |
| C  | -6.46312600 | -1.53664300 | 1.05320900  |
| H  | -5.15531300 | -3.11210200 | 0.36795300  |
| H  | -7.54487100 | 0.24119400  | 1.62004800  |
| H  | -7.21614900 | -2.21804600 | 1.43953700  |
| C  | -3.59616900 | 2.66535400  | -0.37121700 |
| C  | -2.18773600 | 3.11442300  | -0.80096700 |
| H  | -3.87387100 | 3.00138700  | 0.63299700  |
| H  | -4.37596900 | 3.02720600  | -1.05577000 |
| C  | -1.63484100 | 1.87720300  | -1.55537400 |
| H  | -1.57809800 | 3.33252000  | 0.08264100  |
| H  | -2.19371300 | 4.01174000  | -1.42566700 |
| C  | -0.12799500 | 1.60838300  | -1.41050600 |
| H  | -1.83327000 | 1.98931700  | -2.63283500 |
| H  | 0.14603400  | 0.79502100  | -2.09259100 |
| H  | 0.42140800  | 2.49774100  | -1.74449700 |
| C  | 0.32349000  | 1.22777500  | 0.02006600  |
| C  | 1.77627500  | 0.85195300  | 0.09757300  |
| H  | 0.12014400  | 2.05404800  | 0.70881300  |
| C  | 2.83860400  | 1.77468100  | 0.32151300  |
| O  | 2.13360700  | -0.42906500 | -0.20304400 |
| C  | 4.20049500  | 1.34674300  | 0.31495200  |
| C  | 2.60040900  | 3.16160300  | 0.56233600  |
| Si | 1.40851200  | -1.95520000 | 0.02953700  |
| C  | 5.23739200  | 2.24020600  | 0.54406900  |
| H  | 4.41748800  | 0.30222500  | 0.12265000  |
| C  | 3.64904400  | 4.04253600  | 0.79046600  |
| H  | 1.58524100  | 3.54493500  | 0.56491400  |
| C  | 0.06794200  | -2.23755400 | -1.26625000 |
| C  | 0.68808000  | -2.05385800 | 1.77203500  |
| C  | 2.86274100  | -3.17708500 | -0.20042300 |
| C  | 4.97860900  | 3.59709700  | 0.78663200  |
| H  | 6.26328200  | 1.87906700  | 0.53307000  |
| H  | 3.43020000  | 5.09227000  | 0.97127100  |
| H  | -0.73235700 | -1.49206200 | -1.19532700 |
| H  | 0.47672800  | -2.19498000 | -2.28257900 |
| H  | -0.38518800 | -3.22775800 | -1.13273000 |

## SUPPORTING INFORMATION

|   |             |             |             |
|---|-------------|-------------|-------------|
| H | -0.20382400 | -1.42726200 | 1.88296300  |
| H | 0.39394700  | -3.08460500 | 2.00473200  |
| H | 1.41710900  | -1.73671500 | 2.52606000  |
| C | 3.89771100  | -2.99881100 | 0.93140500  |
| C | 3.55439900  | -2.93284400 | -1.55903500 |
| C | 2.32677900  | -4.62614400 | -0.16316400 |
| H | 5.79402100  | 4.29208100  | 0.96546200  |
| H | 4.74061300  | -3.69036900 | 0.78770100  |
| H | 4.30599000  | -1.98190000 | 0.95598000  |
| H | 3.46635700  | -3.21011200 | 1.91725400  |
| H | 3.96327500  | -1.91878700 | -1.62903500 |
| H | 4.38700200  | -3.63869500 | -1.69346800 |
| H | 2.86630000  | -3.07638200 | -2.40115500 |
| H | 1.61523700  | -4.82323600 | -0.97381100 |
| H | 3.15675700  | -5.33832600 | -0.27657900 |
| H | 1.82768600  | -4.85853900 | 0.78587400  |
| H | -0.29321000 | 0.39081900  | 0.36505800  |

### int9

|                                              |                             |
|----------------------------------------------|-----------------------------|
| Zero-point correction=                       | 0.227702 (Hartree/Particle) |
| Thermal correction to Energy=                | 0.255951                    |
| Thermal correction to Enthalpy=              | 0.256895                    |
| Thermal correction to Gibbs Free Energy=     | 0.159276                    |
| Sum of electronic and zero-point Energies=   | -2357.767578                |
| Sum of electronic and thermal Energies=      | -2357.739329                |
| Sum of electronic and thermal Enthalpies=    | -2357.738385                |
| Sum of electronic and thermal Free Energies= | -2357.836005                |

### Cartesian coordinates

|   |             |             |             |
|---|-------------|-------------|-------------|
| C | 3.36103300  | 1.33827700  | -0.60933900 |
| C | 2.44293800  | 0.51540000  | 0.07396400  |
| C | 2.96535500  | -0.57611000 | 0.80233700  |
| C | 4.33627100  | -0.82611900 | 0.82726500  |
| C | 5.23670000  | -0.01491500 | 0.13150300  |
| C | 4.72957000  | 1.07069900  | -0.58413200 |
| H | 2.97861600  | 2.19395000  | -1.15592000 |
| H | 2.28648900  | -1.21624600 | 1.35103600  |
| H | 6.30003600  | -0.21857100 | 0.15374700  |
| C | 4.86350600  | -1.94694200 | 1.67879200  |
| F | 3.99432100  | -2.98026900 | 1.76429000  |
| F | 5.10703600  | -1.54440500 | 2.95310900  |
| F | 6.03029400  | -2.44476700 | 1.20558200  |
| C | 5.66152100  | 1.93051300  | -1.39037100 |
| F | 6.92321800  | 1.91982900  | -0.90066600 |
| F | 5.74588000  | 1.51637900  | -2.68081900 |
| F | 5.25983800  | 3.22268100  | -1.43010700 |
| N | 1.11338200  | 0.89166900  | 0.08676100  |
| C | 0.10562200  | 0.07197300  | -0.10729500 |
| S | 0.13994200  | -1.58853100 | -0.62691200 |
| N | -1.10867900 | 0.73537800  | 0.14753700  |
| C | -2.45741700 | 0.42242400  | 0.03771200  |
| C | -2.98897400 | -0.68570900 | -0.64702400 |
| C | -3.36203800 | 1.32624100  | 0.63609700  |
| C | -4.37062600 | -0.87307400 | -0.70564900 |
| H | -2.31541700 | -1.38207900 | -1.12558600 |
| C | -4.73512700 | 1.12369400  | 0.55721400  |
| H | -2.97872600 | 2.19593900  | 1.16078100  |
| C | -5.26342300 | 0.01695000  | -0.11143900 |
| H | -6.33335200 | -0.13556600 | -0.17776300 |
| C | -4.90051200 | -2.10206300 | -1.39405800 |
| C | -5.66491300 | 2.07634400  | 1.25772200  |
| F | -6.85246900 | 2.18514900  | 0.61935600  |
| F | -5.94193300 | 1.67056800  | 2.52209300  |
| F | -5.14597400 | 3.32116000  | 1.35627700  |
| F | -6.15980000 | -1.92583400 | -1.85585300 |
| F | -4.13560200 | -2.46918100 | -2.44733800 |
| F | -4.94080000 | -3.16871000 | -0.55645500 |
| H | -0.92263500 | 1.66086900  | 0.51920300  |

### int10

|                               |                             |
|-------------------------------|-----------------------------|
| Zero-point correction=        | 0.535937 (Hartree/Particle) |
| Thermal correction to Energy= | 0.565958                    |

## SUPPORTING INFORMATION

|                                              |              |
|----------------------------------------------|--------------|
| Thermal correction to Enthalpy=              | 0.566902     |
| Thermal correction to Gibbs Free Energy=     | 0.472057     |
| Sum of electronic and zero-point Energies=   | -1391.988069 |
| Sum of electronic and thermal Energies=      | -1391.958048 |
| Sum of electronic and thermal Enthalpies=    | -1391.957104 |
| Sum of electronic and thermal Free Energies= | -1392.051948 |

### Cartesian coordinates

|    |             |             |             |
|----|-------------|-------------|-------------|
| N  | -2.29306000 | -0.92180500 | 1.04537300  |
| C  | -3.34524000 | -1.30021900 | 0.40829300  |
| C  | -4.38948800 | -0.34729900 | -0.02453300 |
| C  | -4.24719900 | 1.03051600  | 0.22424000  |
| C  | -5.54435400 | -0.79726000 | -0.68536500 |
| C  | -5.22876800 | 1.92923400  | -0.18194400 |
| H  | -3.35992300 | 1.38094400  | 0.74062400  |
| C  | -6.52975500 | 0.10500200  | -1.08979800 |
| H  | -5.68059600 | -1.85552700 | -0.88413300 |
| C  | -6.37462200 | 1.46951600  | -0.84129500 |
| H  | -5.10424300 | 2.99028800  | 0.01620700  |
| H  | -7.41742000 | -0.25998300 | -1.59866400 |
| H  | -7.14083100 | 2.17220100  | -1.15688300 |
| C  | -3.44274600 | -2.80296100 | 0.17761300  |
| C  | -2.02096900 | -3.27088800 | 0.53817300  |
| H  | -3.73764300 | -3.05718400 | -0.84507300 |
| H  | -4.20254800 | -3.23054600 | 0.84591600  |
| C  | -1.47348300 | -2.09720500 | 1.38796300  |
| H  | -1.42871600 | -3.40393400 | -0.37420400 |
| H  | -2.00240000 | -4.21871300 | 1.08196300  |
| C  | 0.02825400  | -1.79354100 | 1.25259800  |
| H  | -1.64137800 | -2.30466700 | 2.45560000  |
| H  | 0.29948400  | -1.03638200 | 1.99514000  |
| H  | 0.60390000  | -2.69486500 | 1.48725100  |
| C  | 0.40200800  | -1.27379000 | -0.16592400 |
| C  | 1.80958200  | -0.77347500 | -0.20294700 |
| H  | 0.27121600  | -2.06616100 | -0.90634900 |
| C  | 2.95306200  | -1.65482400 | -0.33516800 |
| O  | 2.05293200  | 0.47725000  | -0.06872400 |
| C  | 4.26258300  | -1.12268200 | -0.26155400 |
| C  | 2.78416100  | -3.04465300 | -0.53664300 |
| Si | 1.14897000  | 2.03235700  | 0.00989200  |
| C  | 5.36361500  | -1.95641100 | -0.38346400 |
| H  | 4.39755200  | -0.05965400 | -0.10453500 |
| C  | 3.89297700  | -3.87199000 | -0.65773200 |
| H  | 1.79445900  | -3.47980200 | -0.60423300 |
| C  | 0.06069800  | 1.96241500  | 1.53189700  |
| C  | 0.19609800  | 2.14559300  | -1.60236500 |
| C  | 2.58288300  | 3.27341000  | 0.13829500  |
| C  | 5.18063100  | -3.33087100 | -0.58169000 |
| H  | 6.36500400  | -1.54289600 | -0.32452700 |
| H  | 3.75680000  | -4.93681000 | -0.81426200 |
| H  | -0.73728800 | 1.21734600  | 1.43856100  |
| H  | 0.63906400  | 1.74504400  | 2.43616900  |
| H  | -0.41381800 | 2.94198400  | 1.66991200  |
| H  | -0.67530200 | 1.48356900  | -1.62075300 |
| H  | -0.17036500 | 3.17128800  | -1.73018200 |
| H  | 0.82901100  | 1.90805400  | -2.46354500 |
| C  | 3.48038400  | 3.19805600  | -1.11660800 |
| C  | 3.43193700  | 2.99356500  | 1.39817200  |
| C  | 1.98042300  | 4.69568000  | 0.24263900  |
| H  | 6.04488300  | -3.98111100 | -0.67831300 |
| H  | 4.30030800  | 3.92391000  | -1.03020100 |
| H  | 3.93092600  | 2.20713600  | -1.24408200 |
| H  | 2.92697900  | 3.43635400  | -2.03222900 |
| H  | 3.88361500  | 1.99515900  | 1.37920300  |
| H  | 4.24997900  | 3.72372000  | 1.46345200  |
| H  | 2.84270000  | 3.07898100  | 2.31848900  |
| H  | 1.35199100  | 4.81576000  | 1.13292900  |
| H  | 2.79085400  | 5.43357300  | 0.31368100  |
| H  | 1.37870800  | 4.95782700  | -0.63579800 |
| H  | -0.27862000 | -0.46276500 | -0.43056200 |

K<sub>2</sub>CO<sub>3</sub>·TBS<sup>+</sup>

## SUPPORTING INFORMATION

|                                              |                             |
|----------------------------------------------|-----------------------------|
| Zero-point correction=                       | 0.215054 (Hartree/Particle) |
| Thermal correction to Energy=                | 0.234568                    |
| Thermal correction to Enthalpy=              | 0.235513                    |
| Thermal correction to Gibbs Free Energy=     | 0.165075                    |
| Sum of electronic and zero-point Energies=   | -1990.707255                |
| Sum of electronic and thermal Energies=      | -1990.687740                |
| Sum of electronic and thermal Enthalpies=    | -1990.686796                |
| Sum of electronic and thermal Free Energies= | -1990.757234                |

### Cartesian coordinates

|    |             |             |             |
|----|-------------|-------------|-------------|
| Si | 1.16867600  | -0.93669200 | -0.01356800 |
| C  | 1.07957200  | -1.95486500 | -1.59859800 |
| C  | 1.07102100  | -2.02887300 | 1.52083900  |
| C  | 2.76895500  | 0.12321900  | 0.01724200  |
| H  | 0.12831000  | -2.49286700 | -1.64310500 |
| H  | 1.15397300  | -1.32083800 | -2.48986900 |
| H  | 1.89239300  | -2.68950200 | -1.64297300 |
| H  | 0.15538300  | -2.62652600 | 1.49963900  |
| H  | 1.92755700  | -2.71152300 | 1.57520300  |
| H  | 1.06386500  | -1.42969600 | 2.43884000  |
| C  | 2.86043300  | 0.93453400  | 1.32749300  |
| C  | 2.80311500  | 1.09308900  | -1.18295400 |
| C  | 3.99731700  | -0.81139800 | -0.07035900 |
| H  | 3.77467000  | 1.54626600  | 1.33469500  |
| H  | 2.00911300  | 1.61420800  | 1.45202000  |
| H  | 2.89666300  | 0.28315800  | 2.20875900  |
| H  | 1.95879400  | 1.79205600  | -1.16914500 |
| H  | 3.72627000  | 1.69100300  | -1.16546300 |
| H  | 2.77700700  | 0.56045500  | -2.14120800 |
| H  | 4.00716300  | -1.39263500 | -1.00019200 |
| H  | 4.92497900  | -0.22129900 | -0.04455400 |
| H  | 4.03877900  | -1.51815100 | 0.76738200  |
| C  | -1.43835800 | -0.13967900 | 0.00212200  |
| O  | -1.70814100 | -1.36222600 | -0.01159300 |
| O  | -0.09148900 | 0.23410500  | 0.00630000  |
| O  | -2.24878200 | 0.82709100  | 0.01278500  |
| K  | -4.38036200 | -0.88686200 | 0.01277600  |
| K  | -0.84392300 | 3.05221300  | -0.00986700 |

### 3aa

|                                              |                             |
|----------------------------------------------|-----------------------------|
| Zero-point correction=                       | 0.335808 (Hartree/Particle) |
| Thermal correction to Energy=                | 0.353685                    |
| Thermal correction to Enthalpy=              | 0.354629                    |
| Thermal correction to Gibbs Free Energy=     | 0.286232                    |
| Sum of electronic and zero-point Energies=   | -865.118851                 |
| Sum of electronic and thermal Energies=      | -865.100975                 |
| Sum of electronic and thermal Enthalpies=    | -865.100031                 |
| Sum of electronic and thermal Free Energies= | -865.168428                 |

### Cartesian coordinates

|   |             |             |             |
|---|-------------|-------------|-------------|
| N | 1.61021900  | 0.14765900  | 1.08345900  |
| C | 2.49615000  | 0.73414300  | 0.36030700  |
| C | 3.75711600  | 0.06515500  | -0.02878500 |
| C | 3.98261000  | -1.28066600 | 0.31438300  |
| C | 4.75128500  | 0.75487900  | -0.74132100 |
| C | 5.16641000  | -1.91609500 | -0.04763500 |
| H | 3.21442900  | -1.81277000 | 0.86583600  |
| C | 5.94034100  | 0.11748700  | -1.10127900 |
| H | 4.60206000  | 1.79501500  | -1.01404600 |
| C | 6.15098800  | -1.21862600 | -0.75735900 |
| H | 5.32507700  | -2.95665300 | 0.22236300  |
| H | 6.70033900  | 0.66613700  | -1.65063400 |
| H | 7.07520900  | -1.71557900 | -1.03925400 |
| C | 2.16240900  | 2.17050400  | -0.02313600 |
| C | 0.67450500  | 2.25960300  | 0.36349500  |
| H | 2.35231900  | 2.38321400  | -1.08011800 |
| H | 2.78584700  | 2.86350000  | 0.55875200  |
| C | 0.49140200  | 1.07191100  | 1.34405300  |
| H | 0.04873100  | 2.12827000  | -0.52599800 |
| H | 0.40385300  | 3.21674800  | 0.81733800  |
| C | -0.86405700 | 0.34657900  | 1.29497400  |
| H | 0.61409800  | 1.42959500  | 2.37822700  |

## SUPPORTING INFORMATION

---

|   |             |             |             |
|---|-------------|-------------|-------------|
| H | -0.88670000 | -0.39419700 | 2.10348100  |
| H | -1.65783400 | 1.07310500  | 1.50835700  |
| C | -1.14458500 | -0.38247100 | -0.03817600 |
| C | -2.42298100 | -1.20249700 | 0.04204900  |
| H | -1.18703700 | 0.32832300  | -0.86939200 |
| C | -3.75020900 | -0.55445400 | -0.21186900 |
| O | -2.36389500 | -2.39037600 | 0.34807500  |
| C | -4.90718100 | -1.34413100 | -0.09127100 |
| C | -3.88589000 | 0.79964400  | -0.56015900 |
| C | -6.16676400 | -0.79698600 | -0.31449600 |
| H | -4.79331700 | -2.38887600 | 0.17838600  |
| C | -5.14935800 | 1.34934600  | -0.78103100 |
| H | -3.01186700 | 1.43418600  | -0.66060900 |
| C | -6.29037600 | 0.55336100  | -0.65993000 |
| H | -7.05308400 | -1.41803300 | -0.21983400 |
| H | -5.24163500 | 2.39790900  | -1.04891000 |
| H | -7.27320600 | 0.98248800  | -0.83422800 |
| H | -0.32854200 | -1.08310000 | -0.23540800 |

## 6. Synthesis Procedure and Characterization of Products

## 6.1. Synthesis Procedure and Characterization of Pyrroline 3

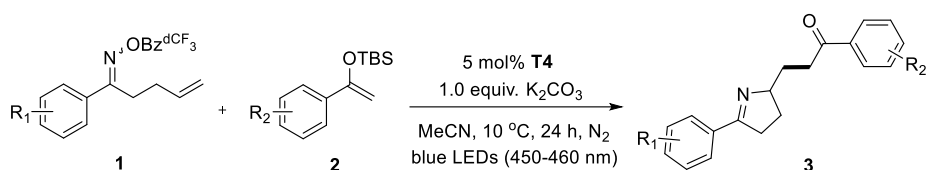

An oven-dried Schlenk tube equipped with a stirring bar was charged with **1** (0.2 mmol, 1.0 equiv.), **T4** (0.01 mmol, 5.0 mg, 5 mol%) and K<sub>2</sub>CO<sub>3</sub> (0.2 mmol, 27.60 mg, 1.0 equiv.). After refilling with N<sub>2</sub> repeated three times, MeCN (1.0 mL) and **2** (0.6 mmol, 3.0 equiv.) was added through syringe. The mixture was stirred at 10 °C in a freezer for 24 h in front of a 20 W blue LEDs bulb. Saturated NaHCO<sub>3</sub> aqueous solution and EtOAc were added and the mixture was stirred for 10 min. The layers were separated and the aqueous layer was extracted with EtOAc. The combined organic layers were then washed with brine, dried over Na<sub>2</sub>SO<sub>4</sub> and concentrated in vacuo. The residue was purified by column chromatography on silica gel to afford the corresponding product.

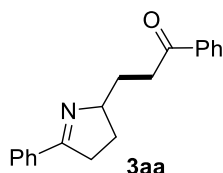

**1-Phenyl-3-(5-phenyl-3,4-dihydro-2H-pyrrol-2-yl)propan-1-one (3aa)**: 42.7 mg, 77% yield as a pale yellow solid.

<sup>1</sup>H NMR (600 MHz, CDCl<sub>3</sub>): δ 8.05-7.97 (m, 2H), 7.84 (dd, *J* = 7.9, 1.8 Hz, 2H), 7.58-7.52 (m, 1H), 7.45 (t, *J* = 7.8 Hz, 2H), 7.44-7.36 (m, 3H), 4.27 (dtdd, *J* = 9.8, 7.8, 5.1, 2.0 Hz, 1H), 3.33 (ddd, *J* = 17.1, 9.3, 5.5 Hz, 1H), 3.24 (ddd, *J* = 17.0, 9.3, 5.9 Hz, 1H), 3.04 (dddd, *J* = 16.8, 9.9, 4.6, 2.2 Hz, 1H), 2.91 (dddd, *J* = 17.1, 9.8, 7.8, 1.9 Hz, 1H), 2.27 (dddd, *J* = 12.5, 9.9, 7.7, 4.5 Hz, 1H), 2.14 (ddt, *J* = 13.6, 9.3, 5.8 Hz, 1H), 2.01 (dtd, *J* = 14.0, 8.9, 5.5 Hz, 1H), 1.65 (ddt, *J* = 12.7, 9.9, 7.4 Hz, 1H);

<sup>13</sup>C NMR (151 MHz, CDCl<sub>3</sub>): δ 200.48, 172.46, 137.16, 134.74, 132.97, 130.45, 128.62, 128.48, 128.24, 127.75, 72.60, 36.25, 35.13, 31.43, 28.98; Data in accordance with literature.<sup>[13]</sup>

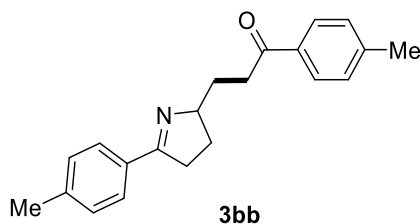

**1-(p-Tolyl)-3-(5-(p-tolyl)-3,4-dihydro-2H-pyrrol-2-yl)propan-1-one (3bb)**: 46.0 mg, 75% yield as a pale yellow solid.

<sup>1</sup>H NMR (600 MHz, CDCl<sub>3</sub>): δ 7.91 (d, *J* = 8.4 Hz, 2H), 7.73 (d, *J* = 8.4 Hz, 2H), 7.25 (d, *J* = 7.8 Hz, 2H), 7.20 (d, *J* = 7.8 Hz, 2H), 4.30-4.21 (m, 1H), 3.29 (ddd, *J* = 16.8, 9.5, 5.5 Hz, 1H), 3.19 (ddd, *J* = 16.8, 9.5, 5.8 Hz, 1H), 3.02 (dddd, *J* = 16.8, 9.9, 4.6, 2.1 Hz, 1H), 2.88 (dddd, *J* = 17.0, 9.7, 7.7, 1.8 Hz, 1H), 2.40 (s, 3H), 2.38 (s, 3H), 2.25 (dddd, *J* = 12.6, 9.9, 7.7, 4.7 Hz, 1H), 2.11 (ddt, *J* = 13.7, 9.5, 5.8 Hz, 1H), 2.00 (dddd, *J* = 13.6, 9.3, 8.1, 5.5 Hz, 1H), 1.64 (ddt, *J* = 12.7, 9.9, 7.4 Hz, 1H);

<sup>13</sup>C NMR (151 MHz, CDCl<sub>3</sub>): δ 200.24, 172.40, 143.69, 140.66, 134.70, 132.05, 129.30, 129.20, 128.39, 127.75, 72.53, 36.15, 35.12, 31.54, 28.93, 21.71, 21.53;

HRMS (ESI) *m/z*: calculated for C<sub>21</sub>H<sub>24</sub>NO [M+H]<sup>+</sup>: 306.1852, found: 306.1850.

## SUPPORTING INFORMATION

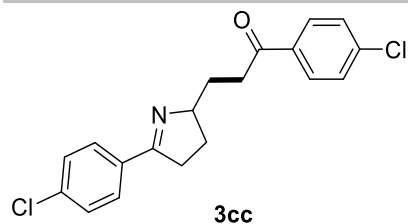

**1-(4-Chlorophenyl)-3-(5-(4-chlorophenyl)-3,4-dihydro-2H-pyrrol-2-yl)propan-1-one (3cc):** 37.0 mg, 53% yield as a yellow solid.

**<sup>1</sup>H NMR** (600 MHz, CDCl<sub>3</sub>): δ 7.97-7.92 (m, 2H), 7.79-7.72 (m, 2H), 7.45-7.40 (m, 2H), 7.39-7.33 (m, 2H), 4.27-4.21 (m, 1H), 3.30 (ddd, *J* = 17.1, 9.1, 5.5 Hz, 1H), 3.19 (ddd, *J* = 17.1, 9.0, 6.0 Hz, 1H), 3.00 (dddd, *J* = 16.8, 10.0, 4.5, 2.2 Hz, 1H), 2.87 (dddd, *J* = 17.1, 9.9, 7.9, 2.0 Hz, 1H), 2.27 (dddd, *J* = 12.5, 9.9, 7.7, 4.5 Hz, 1H), 2.17-2.08 (m, 1H), 1.95 (dtd, *J* = 14.1, 8.8, 5.5 Hz, 1H), 1.64 (ddt, *J* = 12.8, 10.0, 7.5 Hz, 1H);

**<sup>13</sup>C NMR** (151 MHz, CDCl<sub>3</sub>): δ 199.18, 171.57, 139.47, 136.62, 135.48, 133.12, 129.70, 129.12, 128.98, 128.77, 72.63, 36.25, 35.15, 31.33, 29.11;

**HRMS (ESI) *m/z*:** calculated for C<sub>19</sub>H<sub>18</sub>Cl<sub>2</sub>NO [M+H]<sup>+</sup>: 346.0760, found: 346.0757.

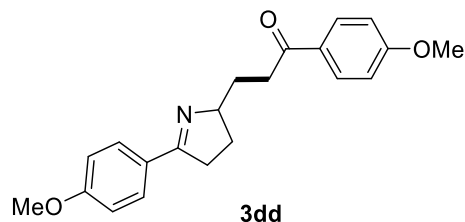

**1-(4-Methoxyphenyl)-3-(5-(4-methoxyphenyl)-3,4-dihydro-2H-pyrrol-2-yl)propan-1-one (3dd):** 40.5 mg, 60% yield as a yellow solid.

**<sup>1</sup>H NMR** (600 MHz, CDCl<sub>3</sub>): δ 7.99 (d, *J* = 8.8 Hz, 2H), 7.78 (d, *J* = 8.8 Hz, 2H), 6.96-6.86 (m, 4H), 4.27-4.19 (m, 1H), 3.85 (s, 3H), 3.83 (s, 3H), 3.25 (ddd, *J* = 16.5, 9.5, 5.5 Hz, 1H), 3.15 (ddd, *J* = 16.5, 9.5, 5.8 Hz, 1H), 3.00 (dddd, *J* = 16.6, 9.9, 4.6, 2.0 Hz, 1H), 2.86 (dddd, *J* = 17.0, 9.7, 7.7, 1.8 Hz, 1H), 2.24 (dddd, *J* = 12.4, 9.8, 7.7, 4.6 Hz, 1H), 2.09 (dtd, *J* = 13.5, 9.4, 5.8 Hz, 1H), 2.02-1.94 (m, 1H), 1.63 (ddt, *J* = 12.6, 9.9, 7.3 Hz, 1H);

**<sup>13</sup>C NMR** (151 MHz, CDCl<sub>3</sub>): δ 199.21, 171.83, 163.43, 161.47, 130.54, 130.30, 129.39, 127.60, 113.80, 113.75, 72.47, 55.54, 55.42, 35.95, 35.07, 31.74, 29.01;

**HRMS (ESI) *m/z*:** calculated for C<sub>21</sub>H<sub>24</sub>NO<sub>3</sub> [M+H]<sup>+</sup>: 338.1751, found: 338.1747.

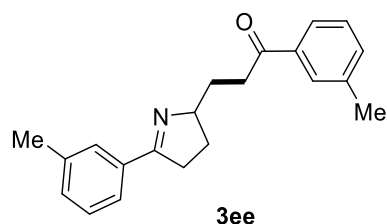

**1-(*m*-Tolyl)-3-(5-(*m*-tolyl)-3,4-dihydro-2H-pyrrol-2-yl)propan-1-one (3ee):** 43.7 mg, 72% yield as a pale yellow solid.

**<sup>1</sup>H NMR** (600 MHz, CDCl<sub>3</sub>): δ 7.86-7.78 (m, 2H), 7.70 (d, *J* = 2.0 Hz, 1H), 7.59 (dt, *J* = 7.6, 1.5 Hz, 1H), 7.38-7.32 (m, 2H), 7.29 (t, *J* = 7.6 Hz, 1H), 7.23 (d, *J* = 7.6 Hz, 1H), 4.32-4.21 (m, 1H), 3.32 (ddd, *J* = 16.9, 9.4, 5.5 Hz, 1H), 3.21 (ddd, *J* = 17.0, 9.4, 5.8 Hz, 1H), 3.03 (dddd, *J* = 16.8, 10.0, 4.6, 2.2 Hz, 1H), 2.90 (dddd, *J* = 17.2, 9.8, 7.8, 1.9 Hz, 1H), 2.41 (s, 3H), 2.38 (s, 3H), 2.26 (dddd, *J* = 12.5, 9.8, 7.6, 4.6 Hz, 1H), 2.12 (dtd, *J* = 13.8, 9.5, 5.8 Hz, 1H), 2.01 (dddd, *J* = 13.7, 9.4, 8.1, 5.5 Hz, 1H), 1.65 (ddt, *J* = 12.7, 9.9, 7.4 Hz, 1H);

**<sup>13</sup>C NMR** (151 MHz, CDCl<sub>3</sub>): δ 200.71, 172.71, 138.35, 138.14, 137.19, 134.65, 133.72, 131.25, 128.79, 128.49, 128.36, 128.22, 125.46, 125.02, 72.59, 36.33, 35.17, 31.46, 28.94, 21.41, 21.40;

**HRMS (ESI) *m/z*:** calculated for C<sub>21</sub>H<sub>24</sub>NO [M+H]<sup>+</sup>: 306.1852, found: 306.1848.



## SUPPORTING INFORMATION

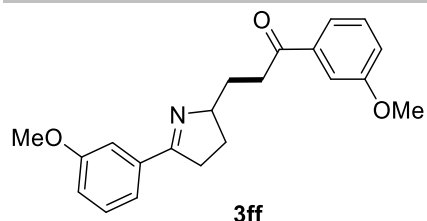

**1-(3-Methoxyphenyl)-3-(5-(3-methoxyphenyl)-3,4-dihydro-2H-pyrrol-2-yl)propan-1-one (3ff):** 47.8 mg, 71% yield as a yellow solid. <sup>1</sup>H NMR (600 MHz, CDCl<sub>3</sub>): δ 7.60 (dt, *J* = 7.7, 1.2 Hz, 1H), 7.53 (dd, *J* = 2.6, 1.5 Hz, 1H), 7.43 (dd, *J* = 2.5, 1.5 Hz, 1H), 7.38-7.33 (m, 2H), 7.30 (t, *J* = 7.9 Hz, 1H), 7.09 (ddd, *J* = 8.3, 2.7, 0.9 Hz, 1H), 6.97 (ddd, *J* = 8.2, 2.7, 1.0 Hz, 1H), 4.31-4.22 (m, 1H), 3.84 (s, 3H), 3.83 (s, 3H), 3.31 (ddd, *J* = 17.0, 9.3, 5.5 Hz, 1H), 3.21 (ddd, *J* = 16.9, 9.3, 6.0 Hz, 1H), 3.02 (dddd, *J* = 16.8, 9.9, 4.6, 2.2 Hz, 1H), 2.89 (dddd, *J* = 17.1, 9.8, 7.8, 1.9 Hz, 1H), 2.26 (dddd, *J* = 12.5, 9.8, 7.7, 4.6 Hz, 1H), 2.12 (ddt, *J* = 13.6, 9.3, 5.8 Hz, 1H), 2.05-1.95 (m, 1H), 1.64 (ddt, *J* = 12.8, 10.0, 7.4 Hz, 1H);

<sup>13</sup>C NMR (151 MHz, CDCl<sub>3</sub>): δ 200.31, 172.46, 159.91, 159.73, 138.56, 136.13, 129.63, 129.47, 120.94, 120.53, 119.50, 116.82, 112.45, 112.26, 72.60, 55.52, 55.45, 36.39, 35.28, 31.48, 28.99;

**HRMS (ESI) m/z:** calculated for C<sub>21</sub>H<sub>24</sub>NO<sub>3</sub> [M+H]<sup>+</sup>: 338.1751, found: 338.1748.

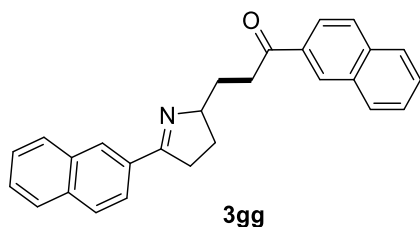

**1-(Naphthalen-2-yl)-3-(5-(naphthalen-2-yl)-3,4-dihydro-2H-pyrrol-2-yl)propan-1-one (3gg):** 48.1 mg, 64% yield as a yellow solid.

<sup>1</sup>H NMR (600 MHz, CDCl<sub>3</sub>): δ 8.58 (d, *J* = 1.7 Hz, 1H), 8.17 (d, *J* = 1.7 Hz, 1H), 8.11 (ddd, *J* = 12.4, 8.6, 1.8 Hz, 2H), 7.97 (d, *J* = 8.1 Hz, 1H), 7.92-7.81 (m, 5H), 7.59 (ddd, *J* = 8.2, 6.7, 1.3 Hz, 1H), 7.57-7.46 (m, 3H), 4.42-4.33 (m, 1H), 3.53 (ddd, *J* = 16.9, 9.4, 5.5 Hz, 1H), 3.40 (ddd, *J* = 16.8, 9.3, 5.9 Hz, 1H), 3.19 (dddd, *J* = 16.7, 10.0, 4.6, 2.1 Hz, 1H), 3.04 (dddd, *J* = 16.9, 9.8, 7.8, 1.8 Hz, 1H), 2.35 (dddd, *J* = 12.4, 9.8, 7.6, 4.5 Hz, 1H), 2.25 (ddt, *J* = 13.6, 9.3, 5.8 Hz, 1H), 2.12 (dtd, *J* = 14.0, 9.0, 5.4 Hz, 1H), 1.74 (ddt, *J* = 12.7, 9.9, 7.4 Hz, 1H);

<sup>13</sup>C NMR (151 MHz, CDCl<sub>3</sub>): δ 200.50, 172.63, 135.65, 134.50, 133.10, 132.69, 132.24, 129.99, 129.70, 128.82, 128.47, 128.43, 128.35, 128.22, 127.86, 127.16, 126.78, 126.49, 124.72, 124.12, 72.81, 36.44, 35.19, 31.70, 29.12;

**HRMS (ESI) m/z:** calculated for C<sub>27</sub>H<sub>24</sub>NO [M+H]<sup>+</sup>: 378.1852, found: 378.1845.

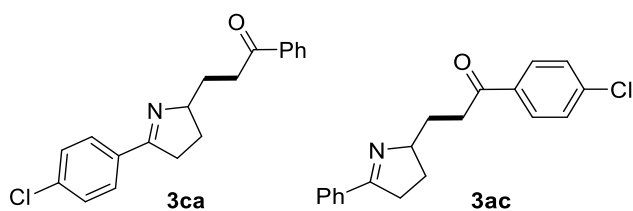

**3-(5-(4-Chlorophenyl)-3,4-dihydro-2H-pyrrol-2-yl)-1-phenylpropan-1-one (3ca)** and **1-(4-Chlorophenyl)-3-(5-phenyl-3,4-dihydro-2H-pyrrol-2-yl)propan-1-one (3ac):** 47.6 mg (**3ca**:**3ac** = 1:1), 76% yield as a yellow solid.

<sup>1</sup>H NMR (600 MHz, CDCl<sub>3</sub>): δ 8.04-7.99 (m, **3ca** 1H), 7.98-7.92 (m, **3ac** 1H), 7.86-7.81 (m, **3ac** 1H), 7.79-7.73 (m, **3ca** 1H), 7.57-7.52 (m, **3ca** 1H), 7.46 (t, *J* = 7.8 Hz, **3ac** 1H), 7.44-7.38 (m, 3H, **3ca** 1H, **3ac** 2H), 7.38-7.34 (m, **3ca** 1H), 4.26 (pd, *J* = 8.1, 2.2 Hz, 1H), 3.32 (dtd, *J* = 17.1, 9.2, 5.5 Hz, 1H), 3.22 (dddd, *J* = 17.3, 11.6, 9.1, 6.0 Hz, 1H), 3.09-2.96 (m, 1H), 2.90 (dddd, *J* = 24.9, 17.0, 9.9, 7.8, 1.9 Hz, 1H), 2.28 (dddd, *J* = 12.5, 10.1, 7.3, 4.6, 2.6 Hz, 1H), 2.20-2.07 (m, 1H), 1.98 (ddtd, *J* = 16.0, 14.1, 8.9, 5.5 Hz, 1H), 1.65 (dddd, *J* = 19.5, 10.2, 7.4, 4.4 Hz, 1H) (*the unlabelled hydrogen signals belong to both 3ca and 3ac*);

<sup>13</sup>C NMR (151 MHz, CDCl<sub>3</sub>): δ 200.43 (**3ca**), 199.30, 172.75, 171.45 (**3ca**), 139.42, 137.16 (**3ca**), 136.54 (**3ca**), 135.49, 134.61, 133.20 (**3ca**), 133.06 (**3ca**), 130.61, 129.73, 129.12 (**3ca**), 128.95, 128.74 (**3ca**), 128.67 (**3ca**), 128.55, 128.26 (**3ca**), 127.81, 72.73 (**3ca**),

## SUPPORTING INFORMATION

72.47, 36.27 (**3ca**), 36.24, 35.19 (**3ca**), 35.14, 31.39 (**3ca**), 31.37, 29.09 (**3ca**), 29.00 (*the unlabeled carbon signals belong to 3ac*); Data in accordance with literature.<sup>[13]</sup>

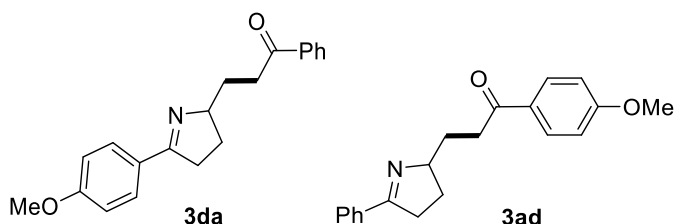

**3-(5-(4-Methoxyphenyl)-3,4-dihydro-2H-pyrrol-2-yl)-1-phenylpropan-1-one (3da)** and **1-(4-Methoxyphenyl)-3-(5-phenyl-3,4-dihydro-2H-pyrrol-2-yl)propan-1-one (3ad)**: 39.7 mg (**3da:3ad** = 2:1), 65% yield as a yellow solid.

<sup>1</sup>H NMR (600 MHz, CDCl<sub>3</sub>): δ 8.03-7.96 (m, **3ca** <sup>4</sup>/<sub>3</sub>H, **3ad** <sup>2</sup>/<sub>3</sub>H), 7.86-7.81 (m, **3da** <sup>4</sup>/<sub>3</sub>H), 7.80-7.75 (m, **3ad** <sup>2</sup>/<sub>3</sub>H), 7.53 (tt, *J* = 7.2, 1.8 Hz, **3ad** <sup>1</sup>/<sub>3</sub>H), 7.44 (t, *J* = 7.8 Hz, **3da** <sup>2</sup>/<sub>3</sub>H), 7.42-7.36 (m, **3da** <sup>4</sup>/<sub>3</sub>H, **3ac** <sup>2</sup>/<sub>3</sub>H), 6.95-6.87 (m, **3da** <sup>4</sup>/<sub>3</sub>H, **3ac** <sup>2</sup>/<sub>3</sub>H), 4.32-4.18 (m, 1H), 3.35-3.12 (m, 2H), 3.01 (ttdd, *J* = 16.3, 9.9, 4.7, 2.1 Hz, 1H), 2.94-2.83 (m, 1H), 2.26 (dddd, *J* = 12.6, 9.7, 7.8, 4.6 Hz, 1H), 2.11 (ddtd, *J* = 13.6, 9.5, 5.8, 1.9 Hz, 1H), 2.04-1.95 (m, 1H), 1.64 (dtt, *J* = 12.7, 9.8, 7.4 Hz, 1H) (*the unlabeled hydrogen signals belong to both 3da and 3ad*);

<sup>13</sup>C NMR (151 MHz, CDCl<sub>3</sub>): δ 200.54 (**3da**), 199.11, 172.52 (**3da**), 171.90, 163.42 (**3da**), 161.48, 137.14, 134.72 (**3da**), 132.96, 130.50 (**3da**), 130.45 (**3da**), 130.25 (**3da**), 129.39, 128.61 (**3da**), 128.47, 128.24, 127.75 (**3da**), 127.48, 113.79 (**3da**), 113.73, 72.63 (**3da**), 72.32, 55.50 (**3da**), 55.39, 36.24 (**3da**), 35.87, 35.13 (**3da**), 35.05, 31.61 (**3da**), 31.46, 28.97 (**3da**), 28.93 (*the unlabeled carbon signals belong to 3ad*); Data in accordance with literature.<sup>[13]</sup>

### 6.2. Synthesis Procedure and Characterization of Ketonitrile 5

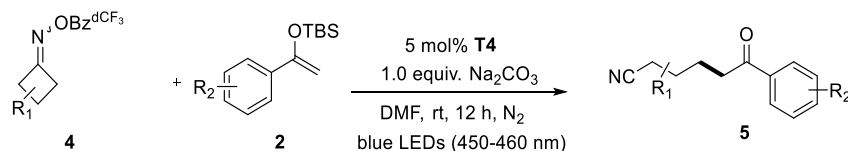

An oven-dried Schlenk tube equipped with a stirring bar was charged with **9** (0.2 mmol, 1.0 equiv.), **T4** (0.01 mmol, 5.0 mg, 5 mol%) and Na<sub>2</sub>CO<sub>3</sub> (0.2 mmol, 21.20 mg, 1.0 equiv.). After refilling with N<sub>2</sub> repeated three times, DMF (2.0 mL) and **2** (0.6 mmol, 3.0 equiv.) was added through syringe. The mixture was stirred at room temperature for 12 h in front of a 20 W blue LEDs bulb. Saturated NaHCO<sub>3</sub> aqueous solution and EtOAc were added and the mixture was stirred for 10 min. The layers were separated and the aqueous layer was extracted with EtOAc. The combined organic layers were then washed with brine, dried over Na<sub>2</sub>SO<sub>4</sub> and concentrated in vacuo. The residue was purified by column chromatography on silica gel to afford the corresponding product.

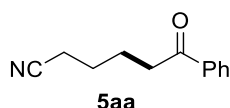

**6-Oxo-6-phenylhexanenitrile (5aa)**: 28.1 mg, 75% yield as a white solid.

<sup>1</sup>H NMR (600 MHz, CDCl<sub>3</sub>): δ 7.95-7.93 (m, 2H), 7.58-7.55 (m, 1H), 7.47-7.45 (m, 2H), 3.03 (t, *J* = 7.0 Hz, 2H), 2.40 (t, *J* = 7.1 Hz, 2H), 1.92-1.87 (m, 2H), 1.78-1.73 (m, 2H);

<sup>13</sup>C NMR (151 MHz, CDCl<sub>3</sub>): δ 199.21, 136.80, 133.32, 128.77, 128.07, 119.62, 37.45, 25.11, 23.19, 17.28; Data in accordance with literature.<sup>[14]</sup>

## SUPPORTING INFORMATION

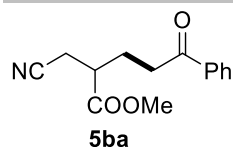

**Methyl 2-(cyanomethyl)-5-oxo-5-phenylpentanoate (5ba):** 35.9 mg, 73% yield as a white solid.

**<sup>1</sup>H NMR** (600 MHz, CDCl<sub>3</sub>): δ 7.95-7.93 (m, 2H), 7.60-7.54 (m, 1H), 7.50-7.43 (m, 2H), 3.73 (s, 3H), 3.15-3.06 (m, 2H), 2.90 (dtd, *J* = 8.4, 6.8, 5.5 Hz, 1H), 2.72 (dd, *J* = 16.9, 7.0 Hz, 1H), 2.64 (dd, *J* = 16.9, 6.7 Hz, 1H), 2.24-2.10 (m, 2H);

**<sup>13</sup>C NMR** (151 MHz, CDCl<sub>3</sub>): δ 198.41, 172.84, 136.59, 133.50, 128.83, 128.09, 117.67, 52.58, 40.80, 35.31, 25.65, 19.95; Data in accordance with literature.<sup>[14]</sup>

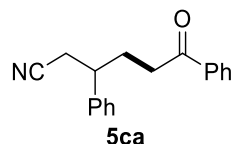

**6-Oxo-3,6-diphenylhexanenitrile (5ca):** 36.1 mg, 68% yield as a pale yellow solid.

**<sup>1</sup>H NMR** (600 MHz, CDCl<sub>3</sub>): δ 7.84-7.82 (m, 2H), 7.53 (td, *J* = 7.3, 1.4 Hz, 1H), 7.41 (t, *J* = 7.8 Hz, 2H), 7.36 (dd, *J* = 8.2, 6.9 Hz, 2H), 7.31-7.27 (m, 1H), 7.25-7.22 (m, 2H), 3.09 (dtd, *J* = 11.4, 6.9, 4.6 Hz, 1H), 2.90 (ddd, *J* = 17.6, 8.4, 6.9 Hz, 1H), 2.82 (ddd, *J* = 17.6, 8.4, 5.3 Hz, 1H), 2.68 (d, *J* = 7.0 Hz, 2H), 2.33 (dddd, *J* = 13.5, 8.5, 6.9, 4.6 Hz, 1H), 2.16 (dddd, *J* = 13.8, 10.8, 8.4, 5.3 Hz, 1H);

**<sup>13</sup>C NMR** (151 MHz, CDCl<sub>3</sub>): δ 199.21, 140.88, 136.76, 133.30, 129.24, 128.72, 128.05, 127.89, 127.42, 118.45, 41.68, 35.98, 29.25, 25.58; Data in accordance with literature.<sup>[15]</sup>

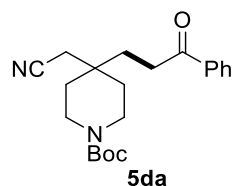

**tert-Butyl 4-(cyanomethyl)-4-(3-oxo-3-phenylpropyl)piperidine-1-carboxylate (5da):** 46.5 mg, 65% yield as a pale yellow solid.

**<sup>1</sup>H NMR** (600 MHz, CDCl<sub>3</sub>): δ 7.96-7.94 (m, 2H), 7.59-7.56 (m, 1H), 7.47 (t, *J* = 7.8 Hz, 2H), 3.50-3.45 (m, 2H), 3.39 (ddd, *J* = 14.0, 9.1, 5.2 Hz, 2H), 3.02-2.94 (m, 2H), 2.43 (s, 2H), 2.03-1.95 (m, 2H), 1.57 (dt, *J* = 7.1, 4.0 Hz, 4H), 1.45 (s, 9H);

**<sup>13</sup>C NMR** (151 MHz, CDCl<sub>3</sub>): δ 198.99, 154.83, 136.67, 133.50, 128.88, 128.17, 117.51, 80.01, 34.11, 32.31, 31.17, 28.52, 26.27 (*the carbonyl carbon signal is overlapped*); Data in accordance with literature.<sup>[14]</sup>

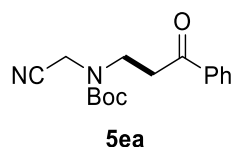

**tert-Butyl (cyanomethyl)(3-oxo-3-phenylpropyl)carbamate (5ea):** 36.7 mg, 64% yield as a white solid.

**<sup>1</sup>H NMR** (600 MHz, CDCl<sub>3</sub>): δ 7.95 (d, *J* = 7.8 Hz, 2H), 7.58 (t, *J* = 7.5 Hz, 1H), 7.47 (t, *J* = 7.8 Hz, 2H), 4.32 (d, *J* = 19.9 Hz, 2H), 3.72 (s, 2H), 3.35 (t, *J* = 16.1 Hz, 2H), 1.47 (d, *J* = 6.8 Hz, 10H);

**<sup>13</sup>C NMR** (151 MHz, CDCl<sub>3</sub>): δ 198.95, 154.22, 136.52, 133.69, 128.88, 128.21, 116.64, 82.12, 43.86, 37.96, 28.35; Data in accordance with literature.<sup>[14]</sup>

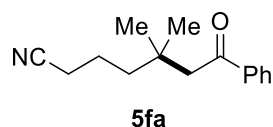

**5,5-Dimethyl-7-oxo-7-phenylheptanenitrile (5fa):** 31.1 mg, 68% yield as a white solid.

## SUPPORTING INFORMATION

**<sup>1</sup>H NMR** (600 MHz, CDCl<sub>3</sub>): δ 7.93-7.91 (m, 2H), 7.56-7.54 (m, 1H), 7.45 (t, *J* = 7.8 Hz, 2H), 2.87 (s, 2H), 2.32 (t, *J* = 7.2 Hz, 2H), 1.72-1.64 (m, 2H), 1.59-1.52 (m, 2H), 1.05 (s, 6H);

**<sup>13</sup>C NMR** (151 MHz, CDCl<sub>3</sub>): δ 200.13, 138.50, 133.07, 128.71, 128.21, 119.87, 47.78, 41.11, 33.86, 27.78, 20.83, 17.88;

**HRMS (ESI) *m/z***: calculated for C<sub>15</sub>H<sub>20</sub>NO [M+H]<sup>+</sup>: 230.1539, found: 230.1535.

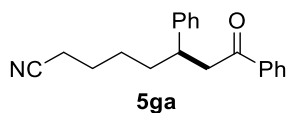

**8-Oxo-6,8-diphenyloctanenitrile (5ga)**: 20.4 mg, 35% yield as a white solid.

**<sup>1</sup>H NMR** (600 MHz, CDCl<sub>3</sub>): δ 7.91-7.89 (m, 2H), 7.56-7.53 (m, 1H), 7.44 (t, *J* = 7.8 Hz, 2H), 7.30 (t, *J* = 7.6 Hz, 2H), 7.23-7.19 (m, 3H), 3.33 (ddt, *J* = 10.1, 7.4, 5.3 Hz, 1H), 3.30-3.21 (m, 2H), 2.27 (td, *J* = 7.2, 2.2 Hz, 2H), 1.79 (dddd, *J* = 13.4, 10.4, 6.1, 4.5 Hz, 1H), 1.70-1.60 (m, 3H), 1.36 (dddd, *J* = 13.4, 9.6, 6.8, 3.7 Hz, 1H), 1.29 (dtd, *J* = 12.2, 4.8, 2.2 Hz, 1H);

**<sup>13</sup>C NMR** (151 MHz, CDCl<sub>3</sub>): δ 198.99, 144.32, 137.21, 133.22, 128.78, 128.73, 128.17, 127.63, 126.73, 119.80, 45.99, 40.90, 35.25, 26.68, 25.34, 17.08;

**HRMS (ESI) *m/z***: calculated for C<sub>15</sub>H<sub>20</sub>NO [M+H]<sup>+</sup>: 230.1539, found: 230.1535.

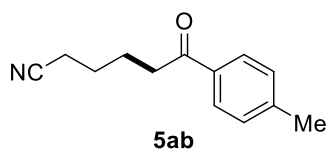

**6-Oxo-6-(*p*-tolyl)hexanenitrile (5ab)**: 30.5 mg, 74% yield as a white solid.

**<sup>1</sup>H NMR** (600 MHz, CDCl<sub>3</sub>): 7.84 (d, *J* = 8.3 Hz, 2H), 7.26 (d, *J* = 8.3 Hz, 2H), 3.00 (t, *J* = 7.0 Hz, 2H), 2.41 (s, 3H), 2.39 (d, *J* = 7.1 Hz, 2H), 1.91-1.86 (m, 2H), 1.78-1.73 (m, 2H);

**<sup>13</sup>C NMR** (151 MHz, CDCl<sub>3</sub>): δ 198.87, 144.14, 134.36, 129.46, 128.22, 119.64, 37.33, 25.15, 23.30, 21.73, 17.29; Data in accordance with literature.<sup>[14]</sup>

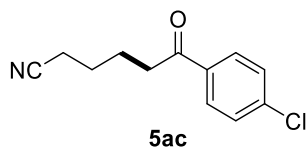

**6-(4-Chlorophenyl)-6-oxohexanenitrile (5ac)**: 36.4 mg, 82% yield as a white solid.

**<sup>1</sup>H NMR** (600 MHz, CDCl<sub>3</sub>): δ 7.8-7.86 (m, 2H), 7.43-7.41 (m, 2H), 3.00 (t, *J* = 7.0 Hz, 2H), 2.39 (t, *J* = 7.1 Hz, 2H), 1.91-1.86 (m, 2H), 1.77-1.72 (m, 2H);

**<sup>13</sup>C NMR** (151 MHz, CDCl<sub>3</sub>): δ 197.90, 139.73, 135.09, 129.49, 129.07, 119.56, 37.43, 25.03, 23.06, 17.27; Data in accordance with literature.<sup>[14]</sup>

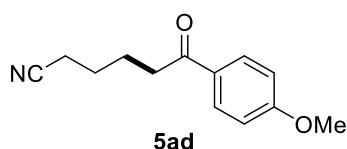

**6-(4-Methoxyphenyl)-6-oxohexanenitrile (5ad)**: 34.3 mg, 82% yield as a white solid.

**<sup>1</sup>H NMR** (600 MHz, CDCl<sub>3</sub>): δ 7.93-7.91 (m, 2H), 6.94-6.92 (m, 2H), 3.86 (s, 3H), 2.97 (t, *J* = 7.0 Hz, 2H), 2.38 (t, *J* = 7.1 Hz, 2H), 1.90-1.85 (m, 2H), 1.77-1.72 (m, 2H);

**<sup>13</sup>C NMR** (151 MHz, CDCl<sub>3</sub>): δ 197.77, 163.66, 130.35, 129.89, 119.65, 113.88, 55.57, 37.07, 25.14, 23.38, 17.25; Data in accordance with literature.<sup>[14]</sup>

## SUPPORTING INFORMATION

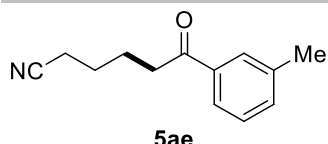

**6-Oxo-6-(*m*-tolyl)hexanenitrile (5ae):** 29.7 mg, 74% yield as a white solid.

**<sup>1</sup>H NMR** (600 MHz, CDCl<sub>3</sub>): δ 7.75-7.73 (m, 2H), 7.39-7.33 (m, 2H), 3.02 (t, *J* = 7.0 Hz, 2H), 2.41 (s, 3H), 2.39 (d, *J* = 7.1 Hz, 2H), 1.92-1.87 (m, 2H), 1.78-1.73 (m, 2H);

**<sup>13</sup>C NMR** (151 MHz, CDCl<sub>3</sub>): δ 199.44, 138.60, 136.87, 134.09, 128.66, 128.61, 125.32, 119.63, 37.51, 25.13, 23.25, 21.46, 17.29; Data in accordance with literature.<sup>[14]</sup>

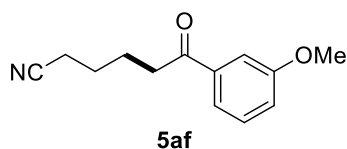

**6-(3-Methoxyphenyl)-6-oxohexanenitrile (5af):** 34.7 mg, 80% yield as a white solid.

**<sup>1</sup>H NMR** (600 MHz, CDCl<sub>3</sub>): δ 7.52 (dt, *J* = 7.6, 1.2 Hz, 1H), 7.46 (dd, *J* = 2.7, 1.6 Hz, 1H), 7.37 (t, *J* = 7.9 Hz, 1H), 7.11 (ddd, *J* = 8.2, 2.7, 0.9 Hz, 1H), 3.85 (s, 3H), 3.01 (t, *J* = 7.0 Hz, 2H), 2.40 (t, *J* = 7.1 Hz, 2H), 1.94-1.85 (m, 2H), 1.79-1.71 (m, 2H);

**<sup>13</sup>C NMR** (151 MHz, CDCl<sub>3</sub>): δ 199.03, 160.00, 138.18, 129.77, 120.69, 119.69, 119.61, 112.42, 55.55, 37.58, 25.10, 23.25, 17.28; Data in accordance with literature.<sup>[16]</sup>

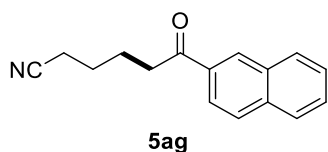

**6-(Naphthalen-2-yl)-6-oxohexanenitrile (5ag):** 36.7 mg, 64% yield as a white solid.

**<sup>1</sup>H NMR** (600 MHz, CDCl<sub>3</sub>): δ 8.46 (s, 1H), 8.02 (dd, *J* = 8.6, 1.8 Hz, 1H), 7.97 (dd, *J* = 8.2, 1.2 Hz, 1H), 7.91-7.87 (m, 2H), 7.61 (ddd, *J* = 8.2, 6.8, 1.3 Hz, 1H), 7.56 (ddd, *J* = 8.2, 6.8, 1.3 Hz, 1H), 3.17 (t, *J* = 7.0 Hz, 2H), 2.43 (t, *J* = 7.2 Hz, 2H), 1.99-1.94 (m, 2H), 1.83-1.78 (m, 2H);

**<sup>13</sup>C NMR** (151 MHz, CDCl<sub>3</sub>): δ 199.15, 135.76, 134.16, 132.63, 129.79, 129.68, 128.68, 127.92, 126.99, 123.84, 119.65, 37.54, 25.18, 23.37, 17.33 (*one carbon signal is overlapped*); Data in accordance with literature.<sup>[14]</sup>

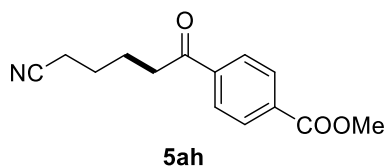

**Methyl 4-(5-cyanopentanoyl)benzoate (5ah):** 35.3 mg, 72% yield as a pale yellow solid.

**<sup>1</sup>H NMR** (600 MHz, CDCl<sub>3</sub>): δ 8.12-8.11 (m, 2H), 8.00-7.98 (m, 2H), 3.94 (s, 3H), 3.06 (t, *J* = 7.2 Hz, 2H), 2.41 (t, *J* = 7.2 Hz, 2H), 1.94-1.89 (m, 2H), 1.79-1.74 (m, 2H);

**<sup>13</sup>C NMR** (151 MHz, CDCl<sub>3</sub>): δ 198.66, 166.29, 139.97, 134.13, 130.03, 128.01, 119.55, 52.60, 37.87, 25.06, 23.03, 17.33; Data in accordance with literature.<sup>[16]</sup>

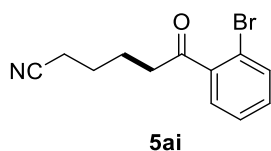

**6-(2-Bromophenyl)-6-oxohexanenitrile (5ai):** 27.7 mg, 52% yield as a white solid.

## SUPPORTING INFORMATION

**<sup>1</sup>H NMR** (600 MHz, CDCl<sub>3</sub>): δ 7.60-7.59 (m, 1H), 7.38-7.34 (m, 2H), 7.31-7.28 (m, 1H), 2.97 (t, *J* = 7.2 Hz, 2H), 2.39 (t, *J* = 7.2 Hz, 2H), 1.90-1.85 (m, 2H), 1.79-1.74 (m, 2H);

**<sup>13</sup>C NMR** (151 MHz, CDCl<sub>3</sub>): δ 203.36, 141.63, 133.81, 131.77, 128.34, 127.64, 119.52, 118.62, 41.63, 24.91, 23.08, 17.25; Data in accordance with literature.<sup>[14]</sup>

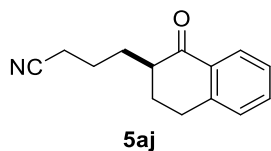

**4-(1-oxo-1,2,3,4-tetrahydronaphthalen-2-yl)butanenitrile (5aj):** 31.1 mg, 68% yield as a white solid.

**<sup>1</sup>H NMR** (600 MHz, CDCl<sub>3</sub>): δ 8.01 (dd, *J* = 7.8, 1.4 Hz, 1H), 7.47 (td, *J* = 7.5, 1.5 Hz, 1H), 7.33-7.28 (m, 1H), 7.24 (d, *J* = 7.6 Hz, 1H), 3.05-3.00 (m, 2H), 2.52 (dtd, *J* = 10.5, 6.2, 4.4 Hz, 1H), 2.45-2.37 (m, 2H), 2.23 (dq, *J* = 13.5, 4.6 Hz, 1H), 2.04 (tdd, *J* = 11.2, 8.4, 5.5 Hz, 1H), 1.93 (dddd, *J* = 13.2, 11.6, 9.3, 6.0 Hz, 1H), 1.81 (ddtd, *J* = 12.4, 10.4, 7.1, 5.1 Hz, 2H), 1.74-1.65 (m, 1H);

**<sup>13</sup>C NMR** (151 MHz, CDCl<sub>3</sub>): δ 199.59, 143.91, 133.53, 132.44, 128.88, 127.57, 126.84, 119.72, 46.99, 29.19, 28.89, 28.72, 23.31, 17.56;

**HRMS (ESI) *m/z*:** calculated for C<sub>14</sub>H<sub>16</sub>NO [M+H]<sup>+</sup>: 214.1226, found: 214.1224.

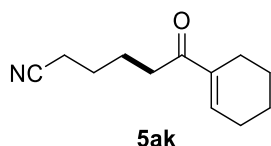

**6-(Cyclohex-1-en-1-yl)-6-oxohexanenitrile (5ak):** 22.9 mg, 60% yield as a white solid.

**<sup>1</sup>H NMR** (600 MHz, CDCl<sub>3</sub>): δ 6.87 (tt, *J* = 3.7, 1.6 Hz, 1H), 2.66 (t, *J* = 7.0 Hz, 2H), 2.34 (t, *J* = 7.1 Hz, 2H), 2.26-2.14 (m, 4H), 1.73 (dtd, *J* = 9.2, 7.6, 7.0, 5.6 Hz, 2H), 1.69-1.63 (m, 2H), 1.63-1.53 (m, 4H);

**<sup>13</sup>C NMR** (151 MHz, CDCl<sub>3</sub>): δ 200.28, 140.16, 139.17, 119.65, 35.78, 26.11, 25.13, 23.58, 23.14, 21.96, 21.56, 17.17; Data in accordance with literature.<sup>[6b]</sup>

### 6.3. Synthesis Procedure and Characterization of Product 12, 14 and 16

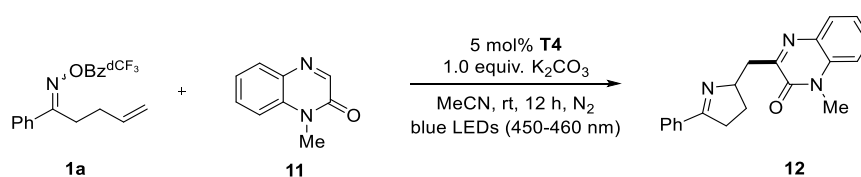

An oven-dried Schlenk tube equipped with a stirring bar was charged with **1a** (0.2 mmol, 83.07 mg, 1.0 equiv.), **11** (0.3 mmol, 48.05 mg, 1.5 equiv.), **T4** (0.01 mmol, 5.0 mg, 5 mol%) and K<sub>2</sub>CO<sub>3</sub> (0.2 mmol, 27.60 mg, 1.0 equiv.). After refilling with N<sub>2</sub> repeated three times, MeCN (2.0 mL) was added through syringe. The mixture was stirred at room temperature for 12 h in front of a 20 W blue LEDs bulb. Saturated NaHCO<sub>3</sub> aqueous solution and EtOAc were added and the mixture was stirred for 10 min. The layers were separated and the aqueous layer was extracted with EtOAc. The combined organic layers were then washed with brine, dried over Na<sub>2</sub>SO<sub>4</sub> and concentrated in vacuo. The residue was purified by column chromatography on silica gel to afford the corresponding product.

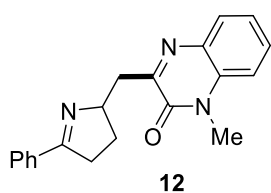

**1-Methyl-3-((5-phenyl-3,4-dihydro-2H-pyrrol-2-yl)methyl)quinoxalin-2(1H)-one (12):** 58.3 mg, 92% yield as a white solid.

## SUPPORTING INFORMATION

**<sup>1</sup>H NMR** (600 MHz, CDCl<sub>3</sub>): δ 7.86-7.82 (m, 3H), 7.52 (t, *J* = 7.8 Hz, 1H), 7.41-7.36 (m, 3H), 7.33 (t, *J* = 7.8 Hz, 1H), 7.29 (d, *J* = 7.8 Hz, 1H), 4.97-4.92 (m, 1H), 3.70 (s, 3H), 3.52 (dd, *J* = 15.0, 6.0 Hz, 1H), 3.10 (dd, *J* = 11.4, 8.4 Hz, 1H), 3.09-3.04 (m, 1H), 2.96-2.91 (m, 1H), 2.32 (dddd, *J* = 12.7, 9.6, 7.7, 4.9 Hz, 1H), 1.78 (ddt, *J* = 13.3, 9.7, 7.0 Hz, 1H);

**<sup>13</sup>C NMR** (151 MHz, CDCl<sub>3</sub>): δ 172.74, 159.11, 155.16, 134.82, 133.31, 132.93, 130.39, 129.96, 129.78, 128.42, 127.88, 123.58, 113.66, 70.95, 41.13, 35.14, 29.17, 29.00;

**HRMS (ESI) *m/z***: calculated for C<sub>20</sub>H<sub>20</sub>N<sub>3</sub>O [M+H]<sup>+</sup>: 318.1601, found: 318.1600.

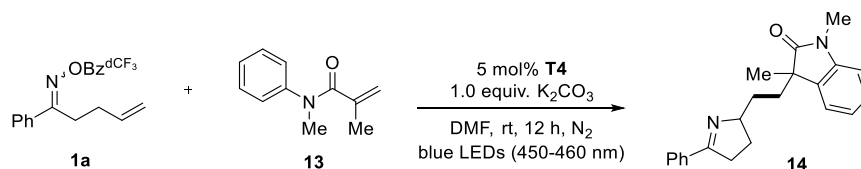

An oven-dried Schlenk tube equipped with a stirring bar was charged with **1a** (0.2 mmol, 83.07 mg, 1.0 equiv.), **13** (0.4 mmol, 70.10 mg, 2.0 equiv.), **T4** (0.01 mmol, 5.0 mg, 5 mol%) and K<sub>2</sub>CO<sub>3</sub> (0.2 mmol, 27.60 mg, 1.0 equiv.). After refilling with N<sub>2</sub> repeated three times, DMF (2.0 mL) was added through syringe. The mixture was stirred at room temperature for 12 h in front of a 20 W blue LEDs bulb. Saturated NaHCO<sub>3</sub> aqueous solution and EtOAc were added and the mixture was stirred for 10 min. The layers were separated and the aqueous layer was extracted with EtOAc. The combined organic layers were then washed with brine, dried over Na<sub>2</sub>SO<sub>4</sub> and concentrated in vacuo. The residue was purified by column chromatography on silica gel to afford the corresponding product.

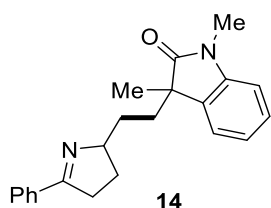

**1,3-Dimethyl-3-(2-(5-phenyl-3,4-dihydro-2H-pyrrol-2-yl)ethyl)indolin-2-one (14)**: 43.9 mg (d.r. = 1:1), 66% yield as a white solid.

**<sup>1</sup>H NMR** (600 MHz, CDCl<sub>3</sub>): δ 7.78-7.74 (m, 4H), 7.37 (dddd, *J* = 11.2, 8.8, 6.7, 3.9 Hz, 6H), 7.24 (ddd, *J* = 7.6, 6.1, 1.3 Hz, 2H), 7.20 (ddd, *J* = 7.0, 5.6, 1.4 Hz, 2H), 7.05 (tdd, *J* = 7.5, 4.9, 1.0 Hz, 2H), 6.82 (t, *J* = 7.2 Hz, 2H), 4.10-3.94 (m, 2H), 3.21 (s, 3H), 3.19 (s, 3H), 2.95 (dddd, *J* = 16.9, 10.2, 4.8, 2.2 Hz, 2H), 2.87-2.75 (m, 2H), 2.19-1.98 (m, 7H), 1.84 (td, *J* = 13.1, 4.1 Hz, 1H), 1.60 (ddd, *J* = 13.3, 11.1, 6.4 Hz, 1H), 1.54-1.45 (m, 2H), 1.39 (s, 3H), 1.38 (s, 3H), 1.14-1.05 (m, 2H);

**<sup>13</sup>C NMR** (151 MHz, CDCl<sub>3</sub>): δ 180.83, 180.76, 172.24, 143.47, 143.42, 134.66, 134.15, 134.02, 130.43, 128.46, 127.80, 127.77, 127.72, 122.73, 122.71, 122.67, 122.60, 108.08, 108.06, 73.33, 73.02, 48.49, 48.31, 35.96, 35.32, 35.12, 35.00, 31.79, 31.35, 28.54, 28.38, 26.27, 26.23, 24.11, 23.83;

**HRMS (ESI) *m/z***: calculated for C<sub>22</sub>H<sub>25</sub>N<sub>2</sub>O [M+H]<sup>+</sup>: 333.1961, found: 333.1958.

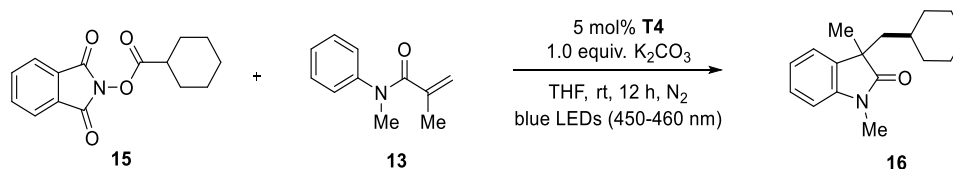

An oven-dried Schlenk tube equipped with a stirring bar was charged with **15** (0.4 mmol, 109.32 mg, 2.0 equiv.), **13** (0.2 mmol, 35.05 mg, 1.0 equiv.), **T4** (0.01 mmol, 5.0 mg, 5 mol%) and K<sub>2</sub>CO<sub>3</sub> (0.2 mmol, 27.60 mg, 1.0 equiv.). After refilling with N<sub>2</sub> repeated three times, THF (2.0 mL) was added through syringe. The mixture was stirred at room temperature for 12 h in front of a 20 W blue LEDs bulb. Saturated NaHCO<sub>3</sub> aqueous solution and EtOAc were added and the mixture was stirred for 10 min. The layers were separated and the aqueous layer was extracted with EtOAc. The combined organic layers were then washed with brine, dried over Na<sub>2</sub>SO<sub>4</sub> and concentrated in vacuo. The residue was purified by column chromatography on silica gel to afford the corresponding product.

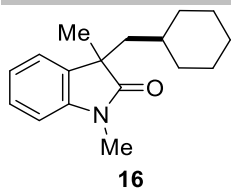

**3-(Cyclohexylmethyl)-1,3-dimethylindolin-2-one (16):** 18.5 mg, 36% yield as a white solid.

**<sup>1</sup>H NMR** (600 MHz, CDCl<sub>3</sub>): δ 8.05-7.99 (m, 2H), 7.87-7.81 (m, 2H), 7.57-7.52 (m, 1H), 7.45 (dd, *J* = 8.4, 7.1 Hz, 2H), 7.42-7.37 (m, 3H), 4.27 (dq, *J* = 9.9, 7.9, 2.0 Hz, 1H), 3.33 (ddd, *J* = 17.0, 9.3, 5.5 Hz, 1H), 3.23 (ddd, *J* = 16.9, 9.2, 5.9 Hz, 1H), 3.04 (dddd, *J* = 16.8, 10.0, 4.6, 2.1 Hz, 1H), 2.90 (dddd, *J* = 17.0, 9.7, 7.8, 1.9 Hz, 1H), 2.27 (dddd, *J* = 12.5, 9.8, 7.7, 4.6 Hz, 1H), 2.14 (ddt, *J* = 13.7, 9.4, 5.8 Hz, 1H), 2.01 (dddd, *J* = 13.8, 9.4, 8.3, 5.5 Hz, 1H), 1.65 (dddd, *J* = 12.8, 10.0, 7.8, 6.8 Hz, 1H);

**<sup>13</sup>C NMR** (151 MHz, CDCl<sub>3</sub>): δ 200.47, 172.47, 137.14, 134.73, 132.97, 130.44, 128.61, 128.47, 128.23, 127.74, 72.59, 36.24, 35.12, 31.41, 28.97; Data in accordance with literature.<sup>[17]</sup>

#### 6.4. Synthesis Procedure and Characterization of Phenanthridine, Quinoline and Pyridine 18

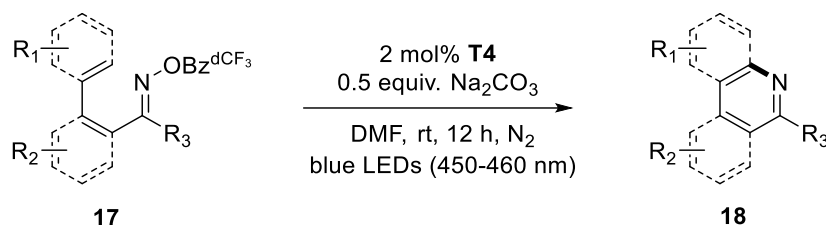

An oven-dried Schlenk tube equipped with a stirring bar was charged with **17** (0.2 mmol, 1.0 equiv.), **T4** (0.004 mmol, 2.0 mg, 2 mol%) and Na<sub>2</sub>CO<sub>3</sub> (0.1 mmol, 10.60 mg, 0.5 equiv.). After refilling with N<sub>2</sub> repeated three times, DMF (2.0 mL) was added through syringe. The mixture was stirred at room temperature for 12 h in front of a 20 W blue LEDs bulb. Saturated NaHCO<sub>3</sub> aqueous solution and EtOAc were added and the mixture was stirred for 10 min. The layers were separated and the aqueous layer was extracted with EtOAc. The combined organic layers were then washed with brine, dried over Na<sub>2</sub>SO<sub>4</sub> and concentrated in vacuo. The residue was purified by column chromatography on silica gel to afford the corresponding product.

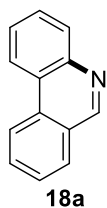

**Phenanthridine (18a):** 30.4 mg, 85% yield as a white solid.

**<sup>1</sup>H NMR** (600 MHz, CDCl<sub>3</sub>): δ 9.28 (s, 1H), 8.59 (d, *J* = 8.4 Hz, 1H), 8.56 (dd, *J* = 8.4, 1.2 Hz, 1H), 8.20 (dd, *J* = 8.4, 1.2 Hz, 1H), 8.03 (dd, *J* = 7.8, 1.2 Hz, 1H), 7.86-7.83 (m, 1H), 7.76-7.73 (m, 1H), 7.71-7.66 (m, 2H);

**<sup>13</sup>C NMR** (151 MHz, CDCl<sub>3</sub>): δ 153.68, 144.56, 132.67, 131.13, 130.23, 128.87, 128.81, 127.60, 127.20, 126.49, 124.22, 122.33, 121.98; Data in accordance with literature.<sup>[7]</sup>

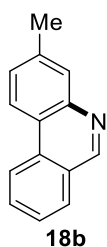

**3-Methylphenanthridine (18b):** 34.2 mg, 88% yield as a white solid.



## SUPPORTING INFORMATION

**<sup>1</sup>H NMR** (600 MHz, CDCl<sub>3</sub>): δ 9.25 (s, 1H), 8.53 (d, *J* = 8.4 Hz, 1H), 8.43 (d, *J* = 8.4 Hz, 1H), 8.02-7.96 (m, 2H), 7.81 (ddd, *J* = 8.4, 7.2, 1.2 Hz, 1H), 7.67-7.62 (m, 1H), 7.49 (dd, *J* = 8.4, 1.8 Hz, 1H), 2.59 (s, 3H);

**<sup>13</sup>C NMR** (151 MHz, CDCl<sub>3</sub>): δ 153.65, 144.72, 138.95, 132.72, 131.00, 129.76, 128.90, 128.82, 127.08, 126.21, 122.08, 121.85, 121.76, 21.66; Data in accordance with literature.<sup>[7]</sup>

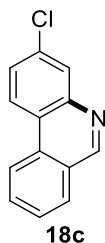

**3-Chlorophenanthridine (18c):** 37.1 mg, 87% yield as a white solid.

**<sup>1</sup>H NMR** (600 MHz, CDCl<sub>3</sub>): δ 9.24 (s, 1H), 8.48 (d, *J* = 8.4 Hz, 1H), 8.42 (d, *J* = 8.4 Hz, 1H), 8.14 (d, *J* = 2.4 Hz, 1H), 8.01 (d, *J* = 7.8 Hz, 1H), 7.84 (ddd, *J* = 8.4, 7.2, 1.2 Hz, 1H), 7.70 (t, *J* = 7.8 Hz, 1H), 7.59 (dd, *J* = 8.4, 2.4 Hz, 1H);

**<sup>13</sup>C NMR** (151 MHz, CDCl<sub>3</sub>): δ 154.77, 145.21, 134.39, 132.18, 131.52, 129.43, 129.00, 127.89, 127.71, 126.35, 123.65, 122.68, 121.86; Data in accordance with literature.<sup>[7]</sup>

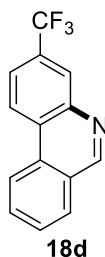

**3-(Trifluoromethyl)phenanthridine (18d):** 42.0 mg, 85% yield as a white solid.

**<sup>1</sup>H NMR** (600 MHz, CDCl<sub>3</sub>): δ 9.32 (s, 1H), 8.63 (d, *J* = 8.8 Hz, 1H), 8.61 (d, *J* = 8.4 Hz, 1H), 8.47 (s, 1H), 8.10 (d, *J* = 8.0 Hz, 1H), 7.96-7.91 (m, 1H), 7.87 (dd, *J* = 8.4, 2.0 Hz, 1H), 7.83-7.77 (m, 1H);

**<sup>13</sup>C NMR** (151 MHz, CDCl<sub>3</sub>): δ 155.01, 143.89, 131.82, 131.70, 130.60 (q, *J* = 33.2 Hz), 129.08, 128.82, 127.78 (q, *J* = 4.6 Hz), 127.01, 126.54, 124.20 (q, *J* = 271.8 Hz), 123.39, 123.06 (q, *J* = 3.0 Hz), 122.33;

**<sup>19</sup>F NMR** (565 MHz, CDCl<sub>3</sub>): δ -62.22; Data in accordance with literature.<sup>[7]</sup>

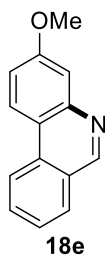

**3-Methoxyphenanthridine (18e):** 37.8 mg, 90% yield as a white solid.

**<sup>1</sup>H NMR** (600 MHz, CDCl<sub>3</sub>): δ 9.23 (s, 1H), 8.47 (d, *J* = 8.4 Hz, 1H), 8.42 (d, *J* = 8.8 Hz, 1H), 8.01 (d, *J* = 8.0 Hz, 1H), 7.86-7.78 (m, 1H), 7.67-7.58 (m, 2H), 7.32 (dd, *J* = 8.8, 2.8 Hz, 1H), 3.98 (s, 3H);

**<sup>13</sup>C NMR** (151 MHz, CDCl<sub>3</sub>): δ 160.18, 154.06, 146.20, 132.86, 131.15, 128.88, 126.48, 125.66, 123.48, 121.45, 118.23, 118.17, 110.08, 55.64; Data in accordance with literature.<sup>[7]</sup>

## SUPPORTING INFORMATION

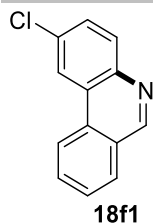

**2-Chlorophenanthridine (18f1):** 9.7 mg (of all 38.9 mg, 91% yield) as a white solid.

**<sup>1</sup>H NMR** (600 MHz, CDCl<sub>3</sub>): δ 9.27 (s, 1H), 8.55-8.51 (m, 2H), 8.12 (d, *J* = 8.4 Hz, 1H), 8.06 (d, *J* = 7.8 Hz, 1H), 7.92-7.85 (m, 1H), 7.78-7.73 (m, 1H), 7.69 (dd, *J* = 8.4, 2.4 Hz, 1H);

**<sup>13</sup>C NMR** (151 MHz, CDCl<sub>3</sub>): δ 153.90, 143.02, 133.20, 131.75, 131.73, 131.48, 129.38, 129.00, 128.35, 126.65, 125.37, 122.08, 122.05; Data in accordance with literature.<sup>[18]</sup>

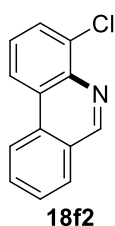

**4-Chlorophenanthridine (18f2):** 29.2 mg (of all 38.9 mg, 91% yield) as a white solid.

**<sup>1</sup>H NMR** (600 MHz, CDCl<sub>3</sub>): δ 9.37 (s, 1H), 8.56 (d, *J* = 8.4 Hz, 1H), 8.47 (d, *J* = 8.4 Hz, 1H), 8.07 (d, *J* = 7.8 Hz, 1H), 7.90-7.81 (m, 2H), 7.73 (t, *J* = 7.8 Hz, 1H), 7.57 (t, *J* = 7.8 Hz, 1H);

**<sup>13</sup>C NMR** (151 MHz, CDCl<sub>3</sub>): δ 154.22, 140.85, 134.45, 132.40, 131.62, 129.23, 129.10, 128.27, 127.11, 126.48, 125.97, 122.26, 121.29; Data in accordance with literature.<sup>[19]</sup>

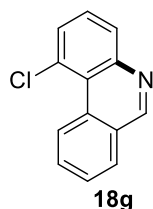

**1-Chlorophenanthridine (18g):** 23.9 mg, 56% yield as a white solid.

**<sup>1</sup>H NMR** (600 MHz, CDCl<sub>3</sub>): δ 9.86 (d, *J* = 8.6 Hz, 1H), 9.25 (s, 1H), 8.14 (dd, *J* = 8.1, 1.5 Hz, 1H), 8.06 (dd, *J* = 7.8, 1.6 Hz, 1H), 7.88 (ddd, *J* = 8.7, 7.0, 1.6 Hz, 1H), 7.79-7.72 (m, 2H), 7.62 (t, *J* = 7.9 Hz, 1H);

**<sup>13</sup>C NMR** (151 MHz, CDCl<sub>3</sub>): δ 154.70, 146.87, 131.98, 131.18, 130.90, 130.86, 130.11, 129.13, 128.10, 127.99, 127.51, 126.49, 122.09;

**HRMS (ESI) *m/z*:** calculated for C<sub>13</sub>H<sub>9</sub>ClN [M+H]<sup>+</sup>: 214.0418, found: 214.0416.

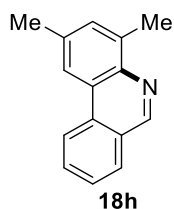

**2,4-Dimethylphenanthridine (18h):** 35.2 mg, 85% yield as a white solid.

**<sup>1</sup>H NMR** (600 MHz, CDCl<sub>3</sub>): δ 9.24 (s, 1H), 8.57 (d, *J* = 8.4 Hz, 1H), 8.20 (s, 1H), 8.02 (d, *J* = 7.8 Hz, 1H), 7.83-7.78 (m, 1H), 7.66 (t, *J* = 7.8 Hz, 1H), 7.44 (s, 1H), 2.85 (s, 3H), 2.58 (s, 3H);

**<sup>13</sup>C NMR** (151 MHz, CDCl<sub>3</sub>): δ 151.38, 141.68, 137.44, 136.53, 132.71, 131.40, 130.65, 128.72, 127.21, 126.35, 123.96, 122.16, 119.80, 22.01, 18.70; Data in accordance with literature.<sup>[19]</sup>

## SUPPORTING INFORMATION

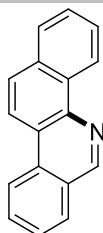

**18i**

**Benzo[c]phenanthridine (18i):** 35.2 mg, 85% yield as a white solid.

**<sup>1</sup>H NMR** (600 MHz, CDCl<sub>3</sub>): δ 9.47 (s, 1H), 9.42 (d, *J* = 8.4 Hz, 1H), 8.63 (d, *J* = 8.4 Hz, 1H), 8.51 (d, *J* = 8.4 Hz, 1H), 8.11 (d, *J* = 7.8 Hz, 1H), 8.01 (d, *J* = 9.0 Hz, 1H), 7.98 (d, *J* = 7.8 Hz, 1H), 7.86 (t, *J* = 7.8 Hz, 2H), 7.70 (t, *J* = 7.8 Hz, 2H), 7.70 (t, *J* = 7.8 Hz, 2H);

**<sup>13</sup>C NMR** (151 MHz, CDCl<sub>3</sub>): δ 152.07, 141.59, 133.38, 132.92, 132.17, 130.89, 128.78, 127.94, 127.79, 127.48, 127.22, 127.11, 126.99, 124.87, 122.29, 121.16, 120.00; Data in accordance with literature.<sup>[7]</sup>

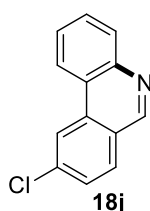

**18j**

**9-Chlorophenanthridine (18j):** 34.6 mg, 81% yield as a white solid.

**<sup>1</sup>H NMR** (600 MHz, CDCl<sub>3</sub>): δ 9.21 (s, 1H), 8.51 (s, 1H), 8.44 (d, *J* = 8.4 Hz, 1H), 8.17 (d, *J* = 8.4 Hz, 1H), 7.94 (d, *J* = 8.4 Hz, 1H), 7.79-7.73 (m, 1H), 7.70-7.65 (m, 1H), 7.65-7.60 (m, 1H);

**<sup>13</sup>C NMR** (151 MHz, CDCl<sub>3</sub>): δ 152.79, 144.74, 137.57, 133.80, 130.32, 129.49, 128.31, 127.51, 124.66, 123.09, 122.33, 121.81 (*one carbon signal is overlapped*); Data in accordance with literature.<sup>[18]</sup>

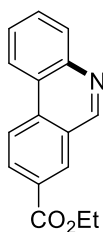

**18k**

**Ethyl phenanthridine-8-carboxylate (18k):** 46.7 mg, 93% yield as a white solid.

**<sup>1</sup>H NMR** (600 MHz, CDCl<sub>3</sub>): δ 9.32 (s, 1H), 8.71 (s, 1H), 8.58 (d, *J* = 8.4 Hz, 1H), 8.54 (d, *J* = 8.4 Hz, 1H), 8.42 (d, *J* = 8.4 Hz, 1H), 8.19 (d, *J* = 8.4 Hz, 1H), 7.78 (t, *J* = 7.8 Hz, 1H), 7.68 (t, *J* = 7.8 Hz, 1H), 4.47 (q, *J* = 7.2 Hz, 2H), 1.47 (t, *J* = 7.2 Hz, 3H);

**<sup>13</sup>C NMR** (151 MHz, CDCl<sub>3</sub>): δ 165.92, 153.81, 145.21, 135.47, 131.04, 130.92, 130.31, 129.91, 129.45, 127.60, 125.80, 123.57, 122.86, 122.25, 61.58, 14.48;

**HRMS (ESI) *m/z*:** calculated for C<sub>16</sub>H<sub>14</sub>NO<sub>2</sub> [M+H]<sup>+</sup>: 252.1019, found: 252.1017.

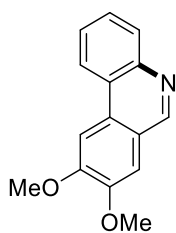

**18l**

**8,9-Dimethoxyphenanthridine (18l):** 41.2 mg, 86% yield as a white solid.

## SUPPORTING INFORMATION

**<sup>1</sup>H NMR** (600 MHz, CDCl<sub>3</sub>): δ 9.12 (s, 1H), 8.40 (d, *J* = 8.4 Hz, 1H), 8.14 (d, *J* = 8.4 Hz, 1H), 7.82 (s, 1H), 7.67 (t, *J* = 7.8 Hz, 1H), 7.61 (t, *J* = 7.8 Hz, 1H), 7.31 (s, 1H), 4.11 (s, 3H), 4.04 (s, 3H);

**<sup>13</sup>C NMR** (151 MHz, CDCl<sub>3</sub>): δ 152.98, 151.83, 150.03, 144.06, 130.22, 128.24, 127.88, 126.68, 123.91, 121.88, 121.81, 107.84, 101.86, 56.25, 56.19; Data in accordance with literature.<sup>[7]</sup>

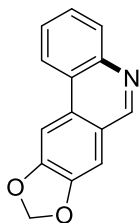

**18m**

**[1,3]Dioxolo[4,5-*j*]phenanthridine (18m)**: 40.6 mg, 91% yield as a white solid.

**<sup>1</sup>H NMR** (600 MHz, CDCl<sub>3</sub>): δ 9.05 (s, 1H), 8.32 (d, *J* = 8.4 Hz, 1H), 8.13 (d, *J* = 8.4 Hz, 1H), 7.84 (s, 1H), 7.67 (t, *J* = 7.8 Hz, 1H), 7.60 (t, *J* = 7.8 Hz, 1H), 7.27 (s, 1H), 6.12 (s, 2H);

**<sup>13</sup>C NMR** (151 MHz, CDCl<sub>3</sub>): δ 151.89, 151.52, 148.26, 144.22, 130.28, 130.15, 128.07, 126.75, 124.36, 123.15, 122.08, 105.53, 102.01, 99.98; Data in accordance with literature.<sup>[7]</sup>

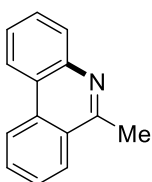

**18n**

**6-Methylphenanthridine (18n)**: 37.5 mg, 97% yield as a white solid.

**<sup>1</sup>H NMR** (600 MHz, CDCl<sub>3</sub>): δ 8.58 (d, *J* = 7.8 Hz, 1H), 8.50 (d, *J* = 8.4 Hz, 1H), 8.18 (d, *J* = 7.8 Hz, 1H), 8.10 (d, *J* = 8.4 Hz, 1H), 7.82-7.29 (m, 1H), 7.71-7.65 (m, 2H), 7.61-7.59 (m, 1H), 3.03 (s, 3H);

**<sup>13</sup>C NMR** (151 MHz, CDCl<sub>3</sub>): δ 158.96, 143.77, 132.64, 130.57, 129.42, 128.73, 127.39, 126.62, 126.42, 125.98, 123.87, 122.39, 122.04, 23.45; Data in accordance with literature.<sup>[7]</sup>

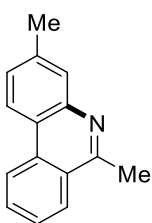

**18o**

**3,6-Dimethylphenanthridine (18o)**: 39.4 mg, 95% yield as a white solid.

**<sup>1</sup>H NMR** (600 MHz, CDCl<sub>3</sub>): δ 8.53 (d, *J* = 8.4 Hz, 1H), 8.36 (d, *J* = 8.4 Hz, 1H), 8.15 (d, *J* = 8.4 Hz, 1H), 7.89 (s, 1H), 7.80-7.74 (m, 1H), 7.64-7.57 (m, 1H), 7.41 (dd, *J* = 8.4, 1.8 Hz, 1H), 3.01 (s, 3H), 2.57 (s, 3H);

**<sup>13</sup>C NMR** (151 MHz, CDCl<sub>3</sub>): δ 158.89, 143.89, 138.79, 132.69, 130.45, 129.05, 128.08, 126.86, 126.57, 125.67, 122.18, 121.81, 121.49, 23.42, 21.64; Data in accordance with literature.<sup>[20]</sup>

## SUPPORTING INFORMATION

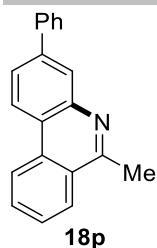

**6-Methyl-3-phenylphenanthridine (18p):** 52.8 mg, 98% yield as a white solid.

**<sup>1</sup>H NMR** (600 MHz, CDCl<sub>3</sub>): δ 8.56 (d, *J* = 8.4 Hz, 1H), 8.52 (d, *J* = 8.4 Hz, 1H), 8.36 (d, *J* = 1.8 Hz, 1H), 8.18 (d, *J* = 7.8 Hz, 1H), 7.85 (dd, *J* = 8.4, 1.8 Hz, 1H), 7.82-7.77 (m, 3H), 7.68-7.63 (m, 1H), 7.51 (t, *J* = 7.8 Hz, 2H), 7.43-7.38 (m, 1H), 3.04 (s, 3H);

**<sup>13</sup>C NMR** (151 MHz, CDCl<sub>3</sub>): δ 159.41, 144.12, 141.30, 140.42, 132.45, 130.63, 129.05, 127.74, 127.39, 127.34, 127.30, 126.65, 125.95, 125.47, 122.91, 122.58, 122.40, 23.50; Data in accordance with literature.<sup>[7]</sup>

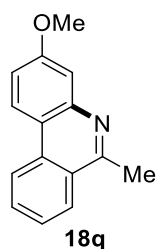

**3-Methoxy-6-methylphenanthridine (18q):** 44.2 mg, 99% yield as a white solid.

**<sup>1</sup>H NMR** (600 MHz, CDCl<sub>3</sub>): δ 8.46 (d, *J* = 8.4 Hz, 1H), 8.36 (d, *J* = 9.0 Hz, 1H), 8.14 (d, *J* = 8.4 Hz, 1H), 7.78-7.73 (m, 1H), 7.58 (t, *J* = 7.8 Hz, 1H), 7.50 (s, 1H), 7.22 (d, *J* = 9.0 Hz, 1H), 3.96 (s, 3H), 3.00 (s, 3H);

**<sup>13</sup>C NMR** (151 MHz, CDCl<sub>3</sub>): δ 160.18, 159.47, 145.34, 132.85, 130.61, 126.63, 126.26, 125.05, 123.25, 121.88, 117.84, 117.38, 109.36, 55.62, 23.41; Data in accordance with literature.<sup>[7]</sup>

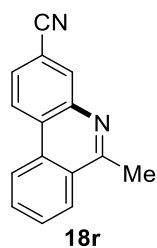

**6-Methylphenanthridine-3-carbonitrile (18r):** 43.0 mg, 98% yield as a white solid.

**<sup>1</sup>H NMR** (600 MHz, CDCl<sub>3</sub>): δ 8.52 (d, *J* = 8.4 Hz, 1H), 8.48 (d, *J* = 8.4 Hz, 1H), 8.30 (d, *J* = 1.8 Hz, 1H), 8.20 (d, *J* = 7.8 Hz, 1H), 7.91-7.85 (m, 1H), 7.80-7.74 (m, 1H), 7.70 (dd, *J* = 8.4, 1.8 Hz, 1H), 3.00 (s, 3H);

**<sup>13</sup>C NMR** (151 MHz, CDCl<sub>3</sub>): δ 161.21, 142.96, 134.34, 131.34, 131.32, 129.20, 127.87, 127.07, 126.85, 126.64, 123.29, 122.84, 118.86, 111.78, 23.45; Data in accordance with literature.<sup>[7]</sup>

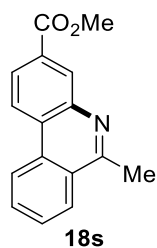

**Methyl 6-methylphenanthridine-3-carboxylate (18s):** 46.9 mg, 93% yield as a white solid.

**<sup>1</sup>H NMR** (600 MHz, CDCl<sub>3</sub>): δ 8.44 (d, *J* = 8.4 Hz, 1H), 8.35 (d, *J* = 9.0 Hz, 1H), 8.12 (d, *J* = 8.4 Hz, 1H), 7.77-7.72 (m, 1H), 7.59-7.54 (m, 1H), 7.49 (d, *J* = 2.8 Hz, 1H), 7.21 (dd, *J* = 9.0, 2.8 Hz, 1H), 3.95 (s, 3H), 2.99 (s, 3H);

## SUPPORTING INFORMATION

**<sup>13</sup>C NMR** (151 MHz, CDCl<sub>3</sub>): δ 160.16, 159.46, 145.28, 132.84, 130.61, 126.62, 126.25, 125.02, 123.24, 121.87, 117.83, 117.36, 109.31, 55.61, 23.35; Data in accordance with literature.<sup>[20]</sup>

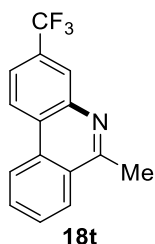

**6-Methyl-3-(trifluoromethyl)phenanthridine (18t):** 51.2 mg, 98% yield as a white solid.

**<sup>1</sup>H NMR** (600 MHz, CDCl<sub>3</sub>): δ 8.52 (t, *J* = 9.0 Hz, 2H), 8.34 (s, 1H), 8.17 (d, *J* = 8.4 Hz, 1H), 7.86-7.81 (m, 1H), 7.77-7.69 (m, 2H), 3.00 (s, 3H);

**<sup>13</sup>C NMR** (151 MHz, CDCl<sub>3</sub>): δ 160.58, 143.06, 131.69, 131.07, 130.42 (q, *J* = 33.4 Hz), 128.57, 126.98 (q, *J* = 4.5 Hz), 126.76, 126.49, 126.14, 124.29 (q, *J* = 271.8 Hz), 123.01, 122.70, 122.21 (q, *J* = 3.0 Hz), 23.46;

**<sup>19</sup>F NMR** (565 MHz, CDCl<sub>3</sub>): δ -62.23; Data in accordance with literature.<sup>[20]</sup>

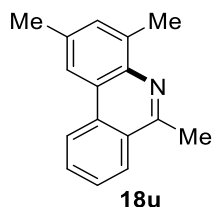

**2,4,6-Trimethylphenanthridine (18u):** 38.5 mg, 87% yield as a white solid.

**<sup>1</sup>H NMR** (600 MHz, CDCl<sub>3</sub>): δ 8.59 (d, *J* = 8.4 Hz, 1H), 8.17 (d, *J* = 7.8 Hz, 1H), 8.16 (s, 1H), 7.77 (t, *J* = 7.8 Hz, 1H), 7.64 (t, *J* = 7.8 Hz, 1H), 7.41 (s, 1H), 3.04 (s, 3H), 2.86 (s, 3H), 2.57 (s, 3H);

**<sup>13</sup>C NMR** (151 MHz, CDCl<sub>3</sub>): δ 156.37, 140.91, 136.92, 135.43, 132.74, 131.18, 129.95, 126.91, 126.45, 125.83, 123.51, 122.59, 119.50, 23.74, 21.98, 18.32; Data in accordance with literature.<sup>[19]</sup>

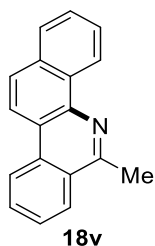

**6-Methylbenzo[c]phenanthridine (18v):** 47.9 mg, 98% yield as a white solid.

**<sup>1</sup>H NMR** (600 MHz, CDCl<sub>3</sub>): δ 9.49 (d, *J* = 8.4 Hz, 1H), 8.63 (d, *J* = 8.4 Hz, 1H), 8.47 (d, *J* = 9.0 Hz, 1H), 8.25 (d, *J* = 7.8 Hz, 1H), 7.97 (d, *J* = 7.8 Hz, 1H), 7.94 (d, *J* = 9.0 Hz, 1H), 7.82 (t, *J* = 7.8 Hz, 1H), 7.77 (t, *J* = 7.8 Hz, 1H), 7.72-7.64 (m, 2H), 3.17 (s, 3H);

**<sup>13</sup>C NMR** (151 MHz, CDCl<sub>3</sub>): δ 157.72, 140.55, 133.40, 132.91, 131.95, 130.25, 127.67, 127.25, 126.96, 126.92, 126.81, 126.56, 126.22, 124.93, 122.74, 120.40, 119.93, 23.71; Data in accordance with literature.<sup>[7]</sup>

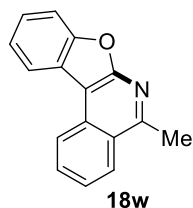

**6-Methylbenzo[c]phenanthridine (18w):** 38.3 mg, 82% yield as a white solid.

## SUPPORTING INFORMATION

**<sup>1</sup>H NMR** (600 MHz, CDCl<sub>3</sub>): δ 8.46 (d, *J* = 8.4 Hz, 1H), 8.25 (d, *J* = 8.4 Hz, 1H), 8.22 (d, *J* = 7.8 Hz, 1H), 7.83 (td, *J* = 7.8, 1.2 Hz, 1H), 7.70 (d, *J* = 7.8 Hz, 1H), 7.58 (td, *J* = 7.8, 1.2 Hz, 1H), 7.49 (td, *J* = 7.8, 1.2 Hz, 1H), 7.44 (td, *J* = 7.8, 1.2 Hz, 1H), 3.08 (s, 3H);

**<sup>13</sup>C NMR** (151 MHz, CDCl<sub>3</sub>): δ 159.14, 158.17, 153.71, 133.02, 131.09, 127.33, 126.33, 125.30, 125.17, 124.02, 123.61, 123.50, 121.89, 112.31, 106.67, 22.96;

**HRMS (ESI) *m/z***: calculated for C<sub>16</sub>H<sub>12</sub>NO [M+H]<sup>+</sup>: 234.0913, found: 234.0914.

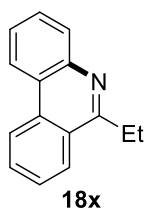

**6-Ethylphenanthridine (18x)**: 55.1 mg, 95% yield as a white solid.

**<sup>1</sup>H NMR** (600 MHz, CDCl<sub>3</sub>): δ 8.61 (d, *J* = 8.4 Hz, 1H), 8.52 (d, *J* = 8.4 Hz, 1H), 8.24 (d, *J* = 8.4 Hz, 1H), 8.14 (d, *J* = 8.4 Hz, 1H), 7.80 (t, *J* = 7.8 Hz, 1H), 7.71 (t, *J* = 7.8 Hz, 1H), 7.67 (t, *J* = 7.8 Hz, 1H), 7.60 (t, *J* = 7.8 Hz, 1H), 3.40 (q, *J* = 7.8 Hz, 2H), 1.52 (t, *J* = 7.8 Hz, 3H);

**<sup>13</sup>C NMR** (151 MHz, CDCl<sub>3</sub>): δ 163.30, 143.89, 133.02, 130.35, 129.67, 128.66, 127.32, 126.37, 126.30, 125.12, 123.77, 122.58, 122.01, 29.47, 13.65; Data in accordance with literature.<sup>[7]</sup>

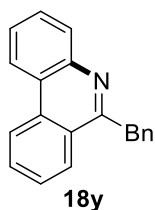

**6-Benzylphenanthridine (18y)**: 51.2 mg, 95% yield as a white solid.

**<sup>1</sup>H NMR** (600 MHz, CDCl<sub>3</sub>): δ 8.57 (d, *J* = 8.4 Hz, 1H), 8.52 (d, *J* = 8.4 Hz, 1H), 8.20 (d, *J* = 7.8 Hz, 1H), 8.16 (d, *J* = 8.4 Hz, 1H), 7.74-7.71 (m, 2H), 7.63 (t, *J* = 7.8 Hz, 1H), 7.54 (t, *J* = 7.8 Hz, 1H), 7.30 (d, *J* = 7.8 Hz, 2H), 7.22 (t, *J* = 7.8 Hz, 2H), 7.14 (t, *J* = 7.8 Hz, 1H), 4.74 (s, 2H);

**<sup>13</sup>C NMR** (151 MHz, CDCl<sub>3</sub>): δ 160.27, 143.79, 139.20, 133.36, 130.48, 129.89, 128.80, 128.65, 127.44, 127.16, 126.80, 126.44, 125.46, 124.04, 122.51, 122.09, 43.12 (*one carbon signal is overlapped*); Data in accordance with literature.<sup>[7]</sup>

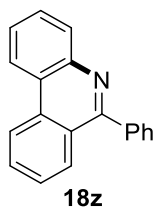

**6-Phenylphenanthridine (18z)**: 50.2 mg, 98% yield as a white solid.

**<sup>1</sup>H NMR** (600 MHz, CDCl<sub>3</sub>): δ 8.71 (d, *J* = 8.4 Hz, 1H), 8.63 (d, *J* = 8.4 Hz, 1H), 8.26 (d, *J* = 7.8 Hz, 1H), 8.11 (d, *J* = 8.4 Hz, 1H), 7.89-7.83 (m, 1H), 7.80-7.73 (m, 3H), 7.70 (td, *J* = 7.8, 1.2 Hz, 1H), 7.62 (t, *J* = 7.8 Hz, 1H), 7.59-7.51 (m, 3H);

**<sup>13</sup>C NMR** (151 MHz, CDCl<sub>3</sub>): δ 161.42, 143.93, 139.92, 133.60, 130.71, 130.50, 129.88, 129.07, 129.00, 128.86, 128.57, 127.27, 127.08, 125.40, 123.90, 122.35, 122.09; Data in accordance with literature.<sup>[7]</sup>

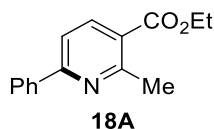

**Ethyl 2-methyl-6-phenylnicotinate (18A)**: 26.5 mg, 55% yield as a yellow oil.

## SUPPORTING INFORMATION

**<sup>1</sup>H NMR** (600 MHz, CDCl<sub>3</sub>): δ 8.27 (d, *J* = 8.1 Hz, 1H), 8.06 (d, *J* = 7.6 Hz, 2H), 7.63 (d, *J* = 8.2 Hz, 1H), 7.49 (t, *J* = 7.5 Hz, 2H), 7.47-7.42 (m, 1H), 4.40 (q, *J* = 7.1 Hz, 2H), 2.92 (s, 3H), 1.42 (t, *J* = 7.1 Hz, 3H);

**<sup>13</sup>C NMR** (151 MHz, CDCl<sub>3</sub>): δ 166.84, 160.10, 159.23, 139.45, 138.69, 129.80, 128.96, 127.46, 123.83, 117.51, 61.28, 25.40, 14.45; Data in accordance with literature.<sup>[7]</sup>

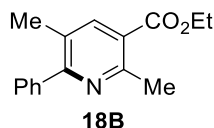

**Ethyl 2,5-dimethyl-6-phenylnicotinate (18B)**: 39.3 mg, 77% yield as a yellow oil.

**<sup>1</sup>H NMR** (600 MHz, CDCl<sub>3</sub>): δ 8.09 (s, 1H), 7.57-7.50 (m, 2H), 7.45 (t, *J* = 7.8 Hz, 2H), 7.42-7.36 (m, 1H), 4.40 (q, *J* = 7.1 Hz, 2H), 2.84 (s, 3H), 2.35 (s, 3H), 1.42 (t, *J* = 7.2 Hz, 3H);

**<sup>13</sup>C NMR** (151 MHz, CDCl<sub>3</sub>): δ 166.95, 160.72, 156.83, 140.95, 140.07, 129.04, 128.49, 128.37, 128.01, 123.92, 61.25, 24.62, 19.54, 14.44; Data in accordance with literature.<sup>[7]</sup>

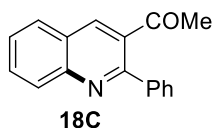

**1-(2-Phenylquinolin-3-yl)ethan-1-one (18C)**: 24.1 mg, 56% yield as a pale yellow solid.

**<sup>1</sup>H NMR** (600 MHz, CDCl<sub>3</sub>): δ 8.13 (s, 1H), 8.09 (d, *J* = 8.4 Hz, 1H), 7.85 (d, *J* = 7.7 Hz, 2H), 7.79 (dd, *J* = 11.8, 8.0 Hz, 2H), 7.64 (t, *J* = 7.5 Hz, 1H), 7.55 (t, *J* = 7.5 Hz, 1H), 7.50 (t, *J* = 7.6 Hz, 2H), 2.75 (s, 3H);

**<sup>13</sup>C NMR** (151 MHz, CDCl<sub>3</sub>): δ 196.94, 156.84, 148.20, 137.44, 136.95, 133.87, 132.40, 131.24, 130.33, 128.90, 128.82, 128.80, 128.25, 126.84, 125.45, 24.37; Data in accordance with literature.<sup>[7]</sup>

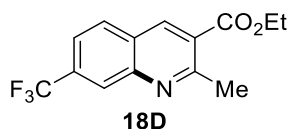

**Ethyl 2-methyl-7-(trifluoromethyl)quinoline-3-carboxylate (18D)**: 39.6 mg, 70% yield as a white solid.

**<sup>1</sup>H NMR** (600 MHz, CDCl<sub>3</sub>): δ 8.75 (s, 1H), 8.34 (s, 1H), 7.98 (d, *J* = 8.5 Hz, 1H), 7.70 (d, *J* = 8.4 Hz, 1H), 4.46 (q, *J* = 7.1 Hz, 2H), 3.00 (s, 3H), 1.46 (t, *J* = 7.1 Hz, 3H);

**<sup>13</sup>C NMR** (151 MHz, CDCl<sub>3</sub>): δ 166.21, 160.14, 147.74, 139.48, 133.18 (q, *J* = 33.4 Hz), 129.71, 127.36, 126.62 (q, *J* = 4.5 Hz), 126.00, 123.89 (q, *J* = 271.8 Hz), 122.31 (q, *J* = 3.0 Hz), 61.87, 25.80, 14.41;

**<sup>19</sup>F NMR** (565 MHz, CDCl<sub>3</sub>): δ -62.95; Data in accordance with literature.<sup>[7]</sup>

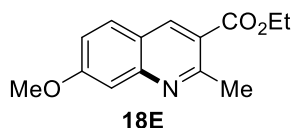

**Ethyl 7-methoxy-2-methylquinoline-3-carboxylate (18E)**: 35.8 mg, 73% yield as a white solid.

**<sup>1</sup>H NMR** (600 MHz, CDCl<sub>3</sub>): δ 8.65 (s, 1H), 7.72 (d, *J* = 8.9 Hz, 1H), 7.37-7.32 (m, 1H), 7.16 (dd, *J* = 8.9, 2.4 Hz, 1H), 4.41 (q, *J* = 7.2 Hz, 2H), 3.95 (s, 3H), 2.96 (s, 3H), 1.43 (t, *J* = 7.2 Hz, 3H);

**<sup>13</sup>C NMR** (151 MHz, CDCl<sub>3</sub>): δ 166.87, 157.96, 147.46, 139.12, 134.69, 130.89, 129.05, 127.93, 127.70, 127.24, 125.27, 125.19, 123.98, 123.81, 61.41, 26.02, 14.48; Data in accordance with literature.<sup>[7]</sup>



## SUPPORTING INFORMATION

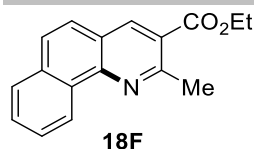

**Ethyl 2-methylbenzo[h]quinoline-3-carboxylate (18F):** 47.7 mg, 90% yield as a white solid.

**<sup>1</sup>H NMR** (600 MHz, CDCl<sub>3</sub>): δ 9.34 (d, *J* = 7.8 Hz, 1H), 8.70 (s, 1H), 7.89 (d, *J* = 7.5 Hz, 1H), 7.81-7.64 (m, 4H), 4.46 (q, *J* = 7.2 Hz, 2H), 3.10 (s, 3H), 1.47 (t, *J* = 7.2 Hz, 3H);

**<sup>13</sup>C NMR** (151 MHz, CDCl<sub>3</sub>): δ 166.75, 162.79, 159.30, 150.79, 139.69, 129.70, 121.65, 121.04, 119.99, 106.72, 61.28, 55.77, 25.87, 14.47; Data in accordance with literature.<sup>[7]</sup>

## References

- [1] A. A. Folgueiras-Amador, X.-Y. Qian, H.-C. Xu, T. Wirth, *Chem. Eur. J.* **2018**, *24*, 487-491.
- [2] a) F. Schaufelberger, K. Seigel, O. Ramström, *Chem. Eur. J.* **2020**, *26*, 15581-15588; b) V. Štrukil, M. D. Igrc, M. Eckert-Maksić, T. Friščić, *Chem. Eur. J.* **2012**, *18*, 8464-8473.
- [3] G. Jakab, A. Hosseini, H. Hausmann, P. R. Schreiner, *Synthesis* **2013**, *45*, 1635-1640.
- [4] C. B. Tripathi, S. Mukherjee, *J. Org. Chem.* **2012**, *77*, 1592-1598.
- [5] a) J. Davies, S. G. Booth, S. Essafi, R. A. W. Dryfe, D. Leonori, *Angew. Chem. Int. Ed.* **2015**, *54*, 14017-14021; b) X. Zhang, D. Qi, C. Jiao, Z. Zhang, X. Liu, G. Zhang, *Org. Chem. Front.* **2021**, *8*, 6522-6529.
- [6] a) X. Zhao, M. Tian, L. Ji, J. Liu, K. Lu, *Org. Lett.* **2020**, *22*, 863-866; b) X. Y. Yu, J. R. Chen, P. Z. Wang, M. N. Yang, D. Liang, W. J. Xiao, *Angew. Chem. Int. Ed.* **2018**, *57*, 738-743.
- [7] H. Jiang, X. An, K. Tong, T. Zheng, Y. Zhang, S. Yu, *Angew. Chem. Int. Ed.* **2015**, *54*, 4055-4059.
- [8] a) I. Khan, B. G. Reed-Berendt, R. L. Melen, L. C. Morrill, *Angew. Chem. Int. Ed.* **2018**, *57*, 12356-12359; b) T. Aono, H. Sasagawa, K. Fuchibe, J. Ichikawa, *Org. Lett.* **2015**, *17*, 5736-5739; c) D. Perrotta, S. Racine, J. Vuilleumier, F. de Nanteuil, J. Waser, *Org. Lett.* **2015**, *17*, 1030-1033; d) J. Duran, J. Mateos, A. Moyano, X. Companyó, *Chem. Sci.* **2023**, *14*, 7147-7153.
- [9] M. J. Frisch, G. W. Trucks, H. B. Schlegel, G. E. Scuseria, M. A. Robb, J. R. Cheeseman, G. Scalmani, V. Barone, G. A. Petersson, H. Nakatsuji, X. Li, M. Caricato, A. V. Marenich, J. Bloino, B. G. Janesko, R. Gomperts, B. Mennucci, H. P. Hratchian, J. V. Ortiz, A. F. Izmaylov, J. L. Sonnenberg, Williams, Ding, F. Ding, F. Lipparini, F. Egidi, J. Goings, B. Peng, A. Petrone, T. Henderson, D. Ranasinghe, V. G. Zakrzewski, J. Gao, N. Rega, G. Zheng, W. Liang, M. Hada, M. Ehara, K. Toyota, R. Fukuda, J. Hasegawa, M. Ishida, T. Nakajima, Y. Honda, O. Kitao, H. Nakai, T. Vreven, K. Throssell, J. A. Montgomery Jr., J. E. Peralta, F. Ogliaro, M. J. Bearpark, J. J. Heyd, E. N. Brothers, K. N. Kudin, V. N. Staroverov, T. A. Keith, R. Kobayashi, J. Normand, K. Raghavachari, A. P. Rendell, J. C. Burant, S. S. Iyengar, J. Tomasi, M. Cossi, J. M. Millam, M. Klene, C. Adamo, R. Cammi, J. W. Ochterski, R. L. Martin, K. Morokuma, O. Farkas, J. B. Foresman, D. J. Fox, *Gaussian 16 Rev. C.01*, Wallingford, CT (2016).
- [10] a) A. D. Becke, *The Journal of Chemical Physics* **1993**, *98*, 5648-5652; b) C. Lee, W. Yang, R. G. Parr, *Physical Review B* **1988**, *37*, 785-789.
- [11] Y. Zhao, D. G. Truhlar, *Theor. Chem. Acc.* **2008**, *120*, 215-241.
- [12] a) V. Barone, M. Cossi, *The Journal of Physical Chemistry A* **1998**, *102*, 1995-2001; b) B. Mennucci, J. Tomasi, *The Journal of Chemical Physics* **1997**, *106*, 5151-5158.
- [13] S.-H. Cai, J.-H. Xie, S. Song, L. Ye, C. Feng, T.-P. Loh, *ACS Catal.* **2016**, *6*, 5571-5574.
- [14] W.-L. Xing, R. Shang, G.-Z. Wang, Y. Fu, *Chem. Commun.* **2019**, *55*, 14291-14294.
- [15] H.-B. Yang, N. Selander, *Chem. Eur. J.* **2017**, *23*, 1779-1783.
- [16] B.-Q. He, X.-Y. Yu, P.-Z. Wang, J.-R. Chen, W.-J. Xiao, *Chem. Commun.* **2018**, *54*, 12262-12265.
- [17] Z. Sun, H. Huang, Q. Wang, C. Huang, G. Mao, G.-J. Deng, *Org. Chem. Front.* **2022**, *9*, 3506-3514.
- [18] Y. Zhang, Y. Ding, R. Chen, Y. Ma, *Adv. Synth. Catal.* **2020**, *362*, 5697-5707.
- [19] G. Maestri, M.-H. Larraufie, É. Derat, C. Ollivier, L. Fensterbank, E. Lacôte, M. Malacria, *Org. Lett.* **2010**, *12*, 5692-5695.
- [20] B. Ma, Q. Xia, D. Wang, J.-K. Jin, Z. Li, Q.-J. Liang, M.-Y. Sun, D. Liu, L.-J. Liu, H.-X. Shu, J. Yang, D. Li, J. He, *Angew. Chem. Int. Ed.* **2023**, *62*, e202300233.

# SUPPORTING INFORMATION

## NMR Spectra

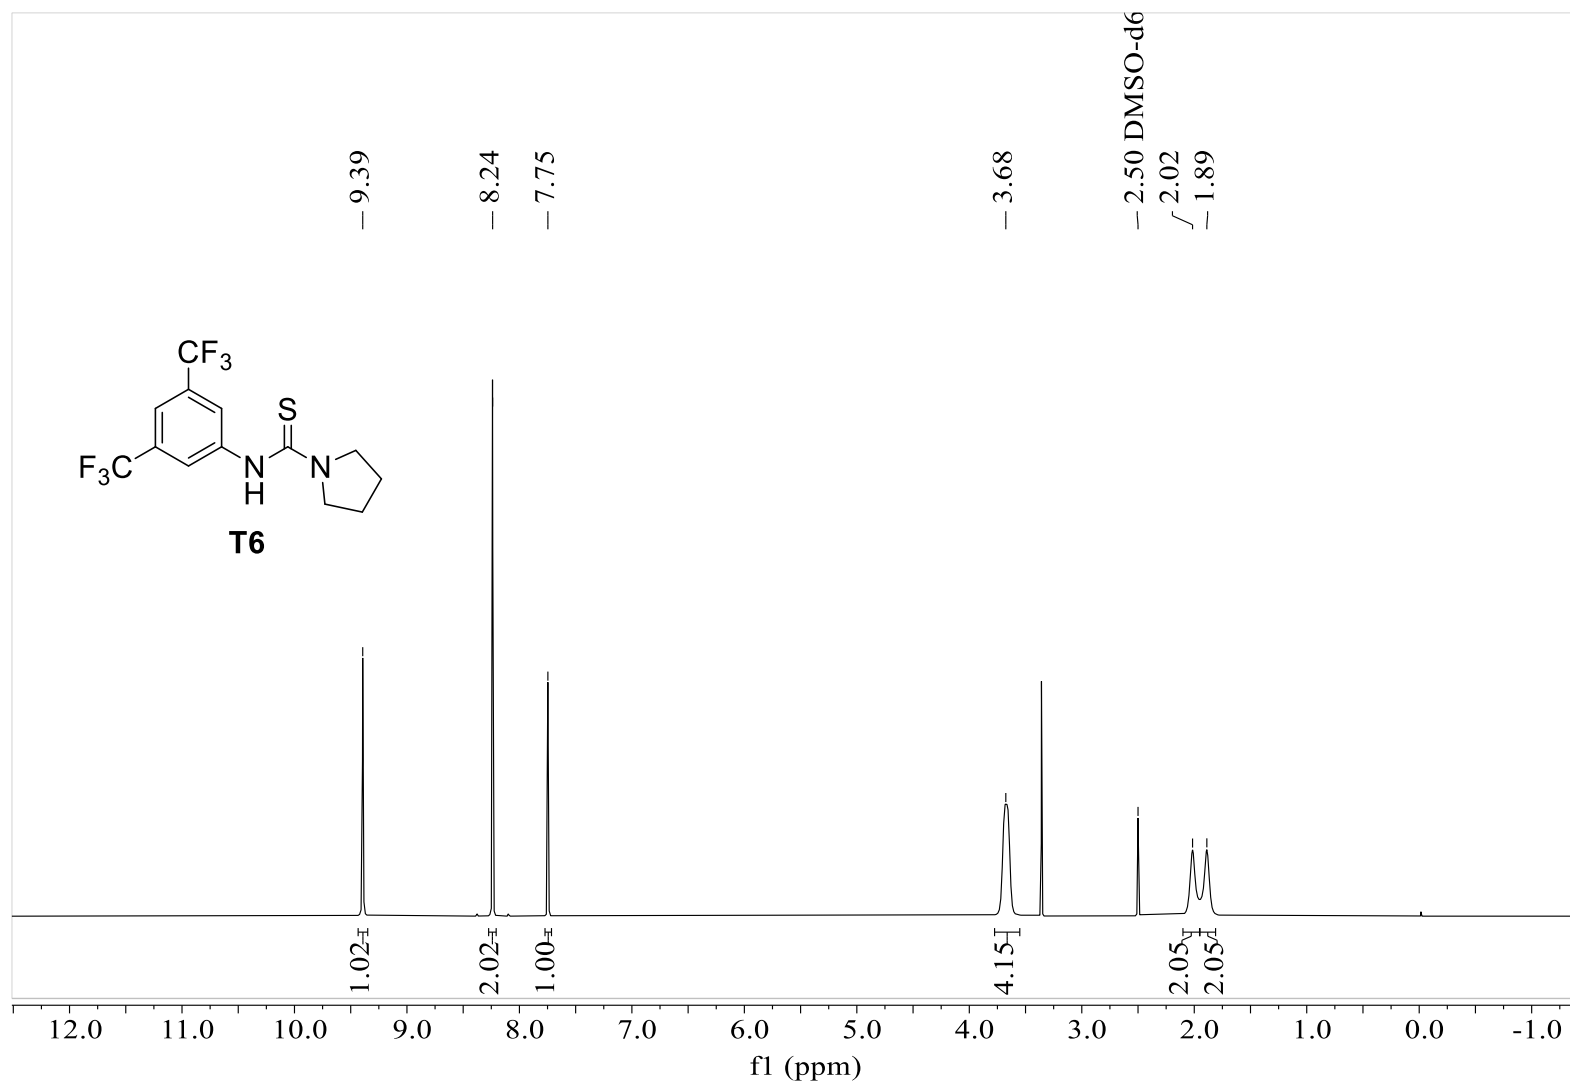

# SUPPORTING INFORMATION

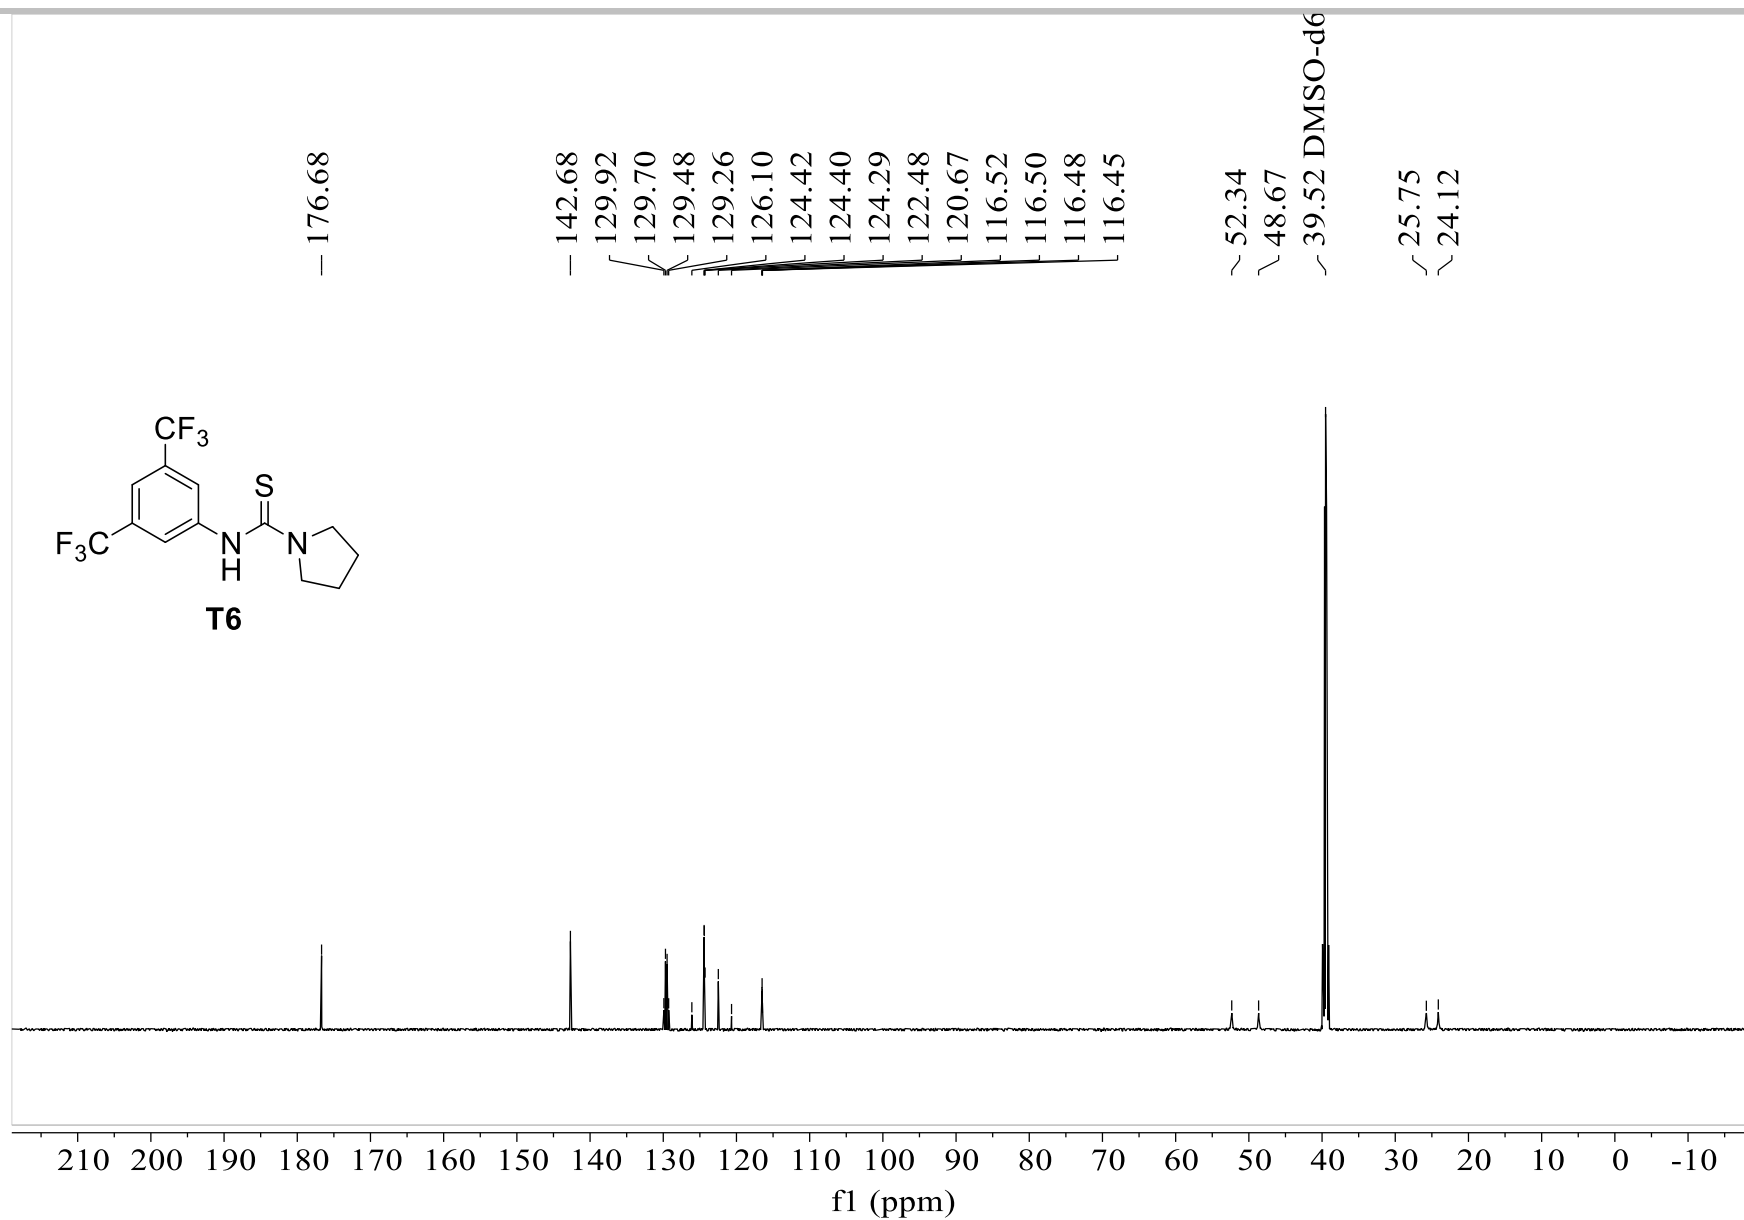

SUPPORTING INFORMATION

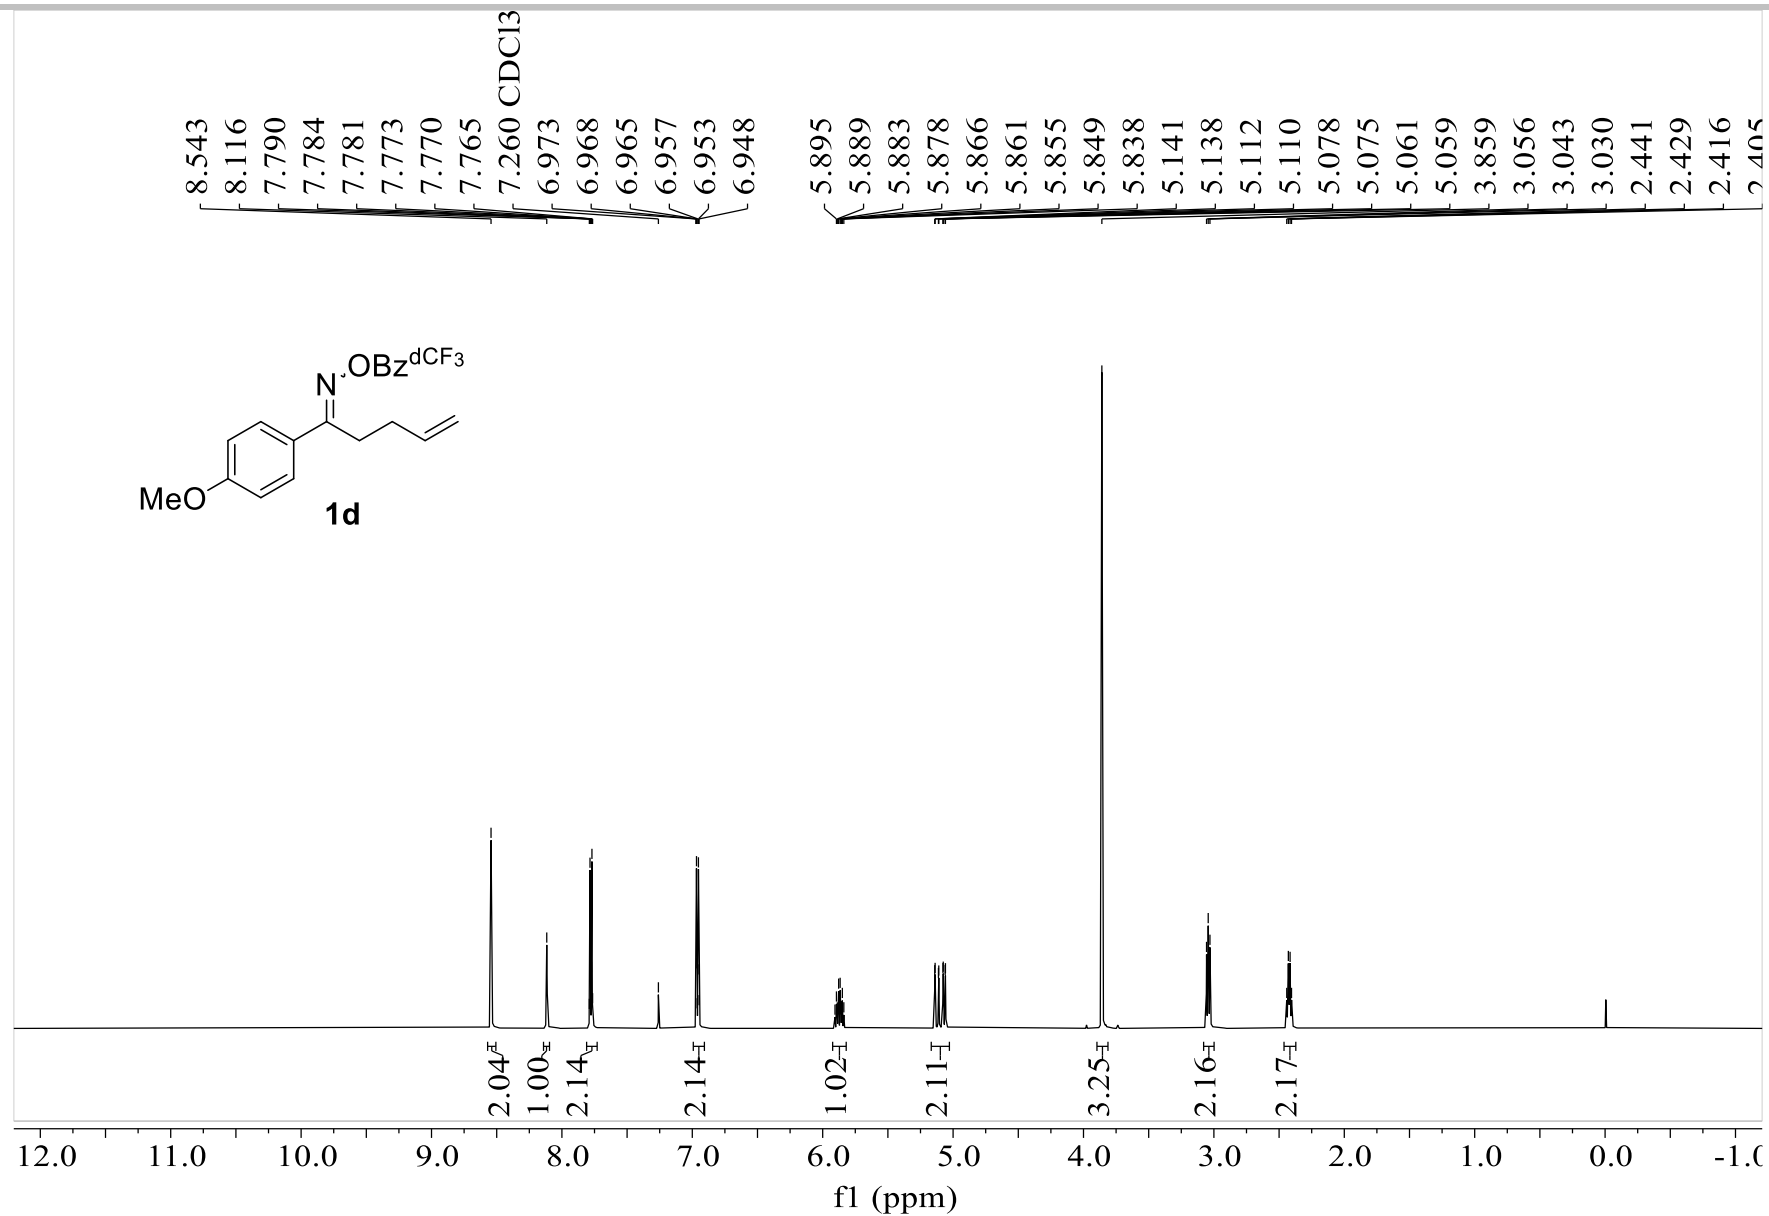

SUPPORTING INFORMATION

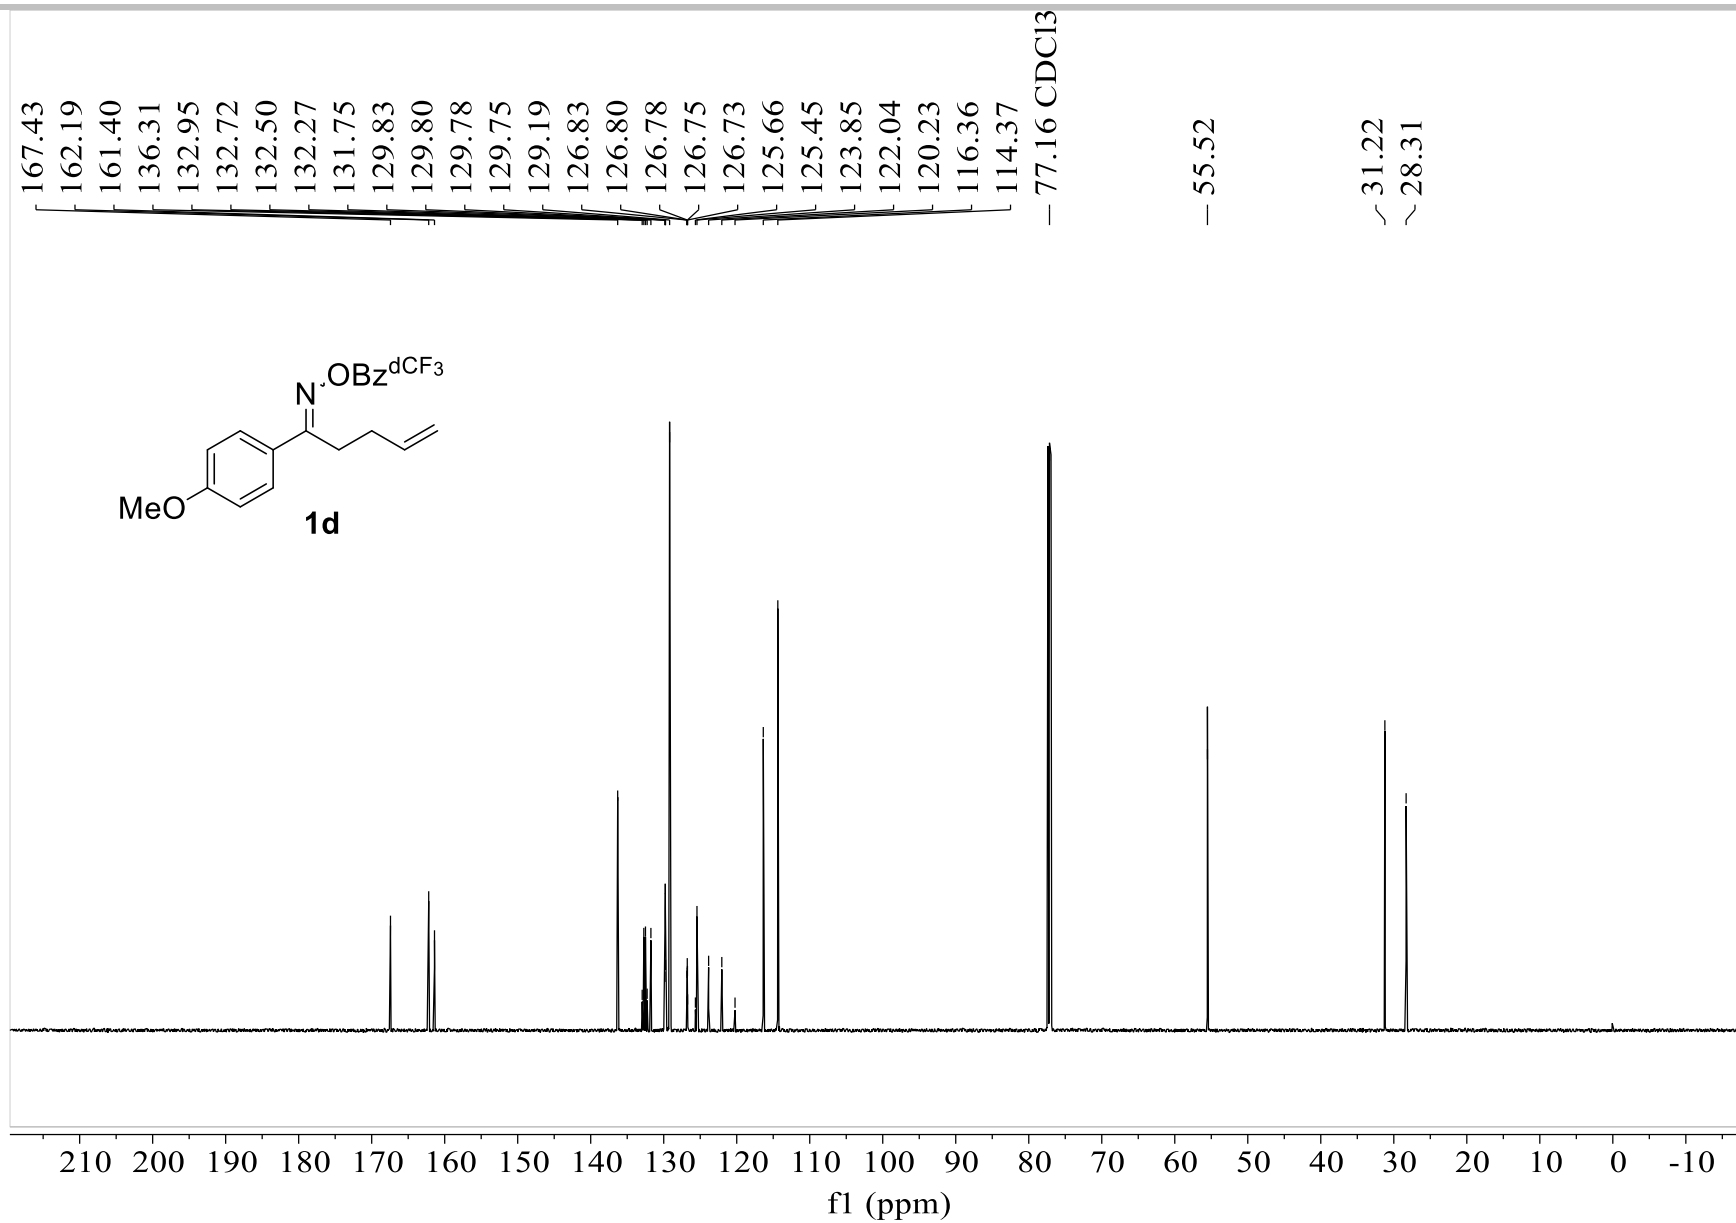

SUPPORTING INFORMATION

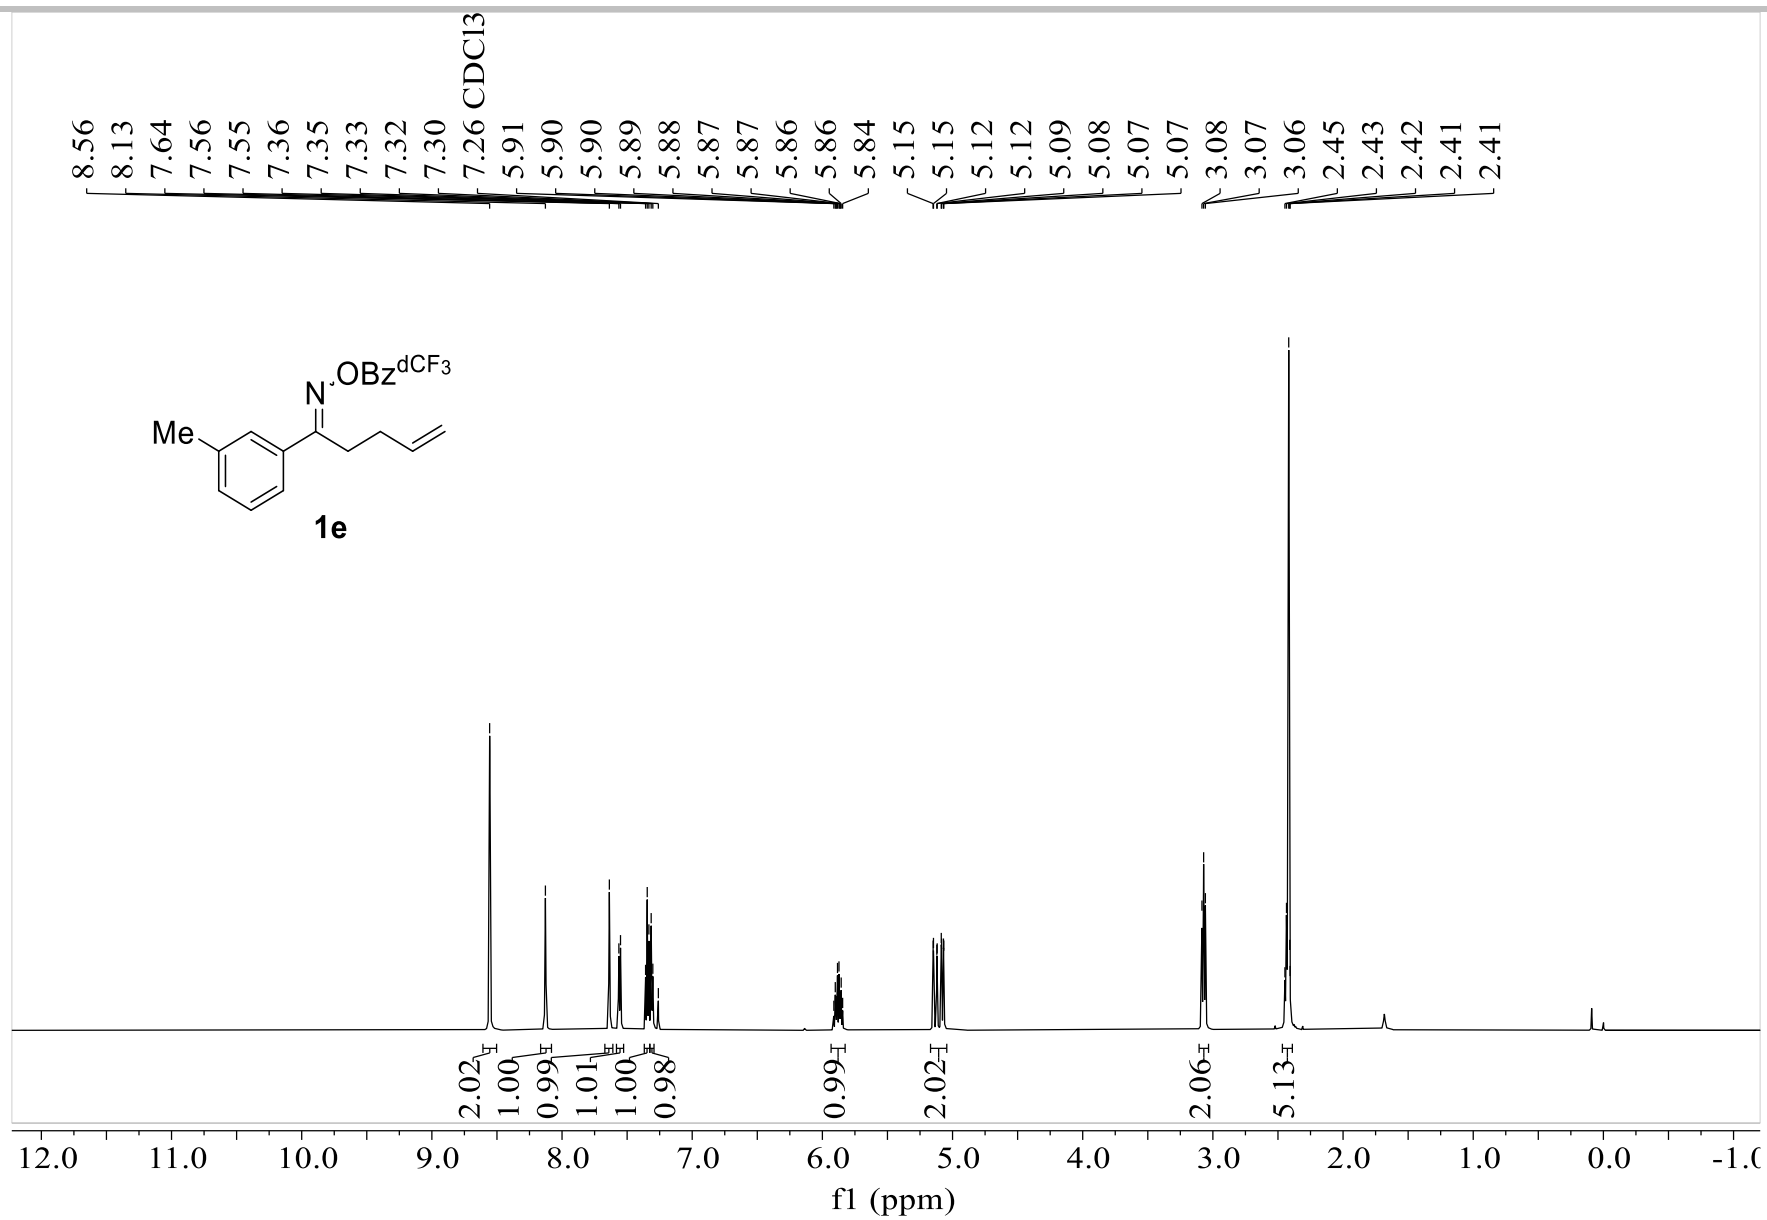

SUPPORTING INFORMATION

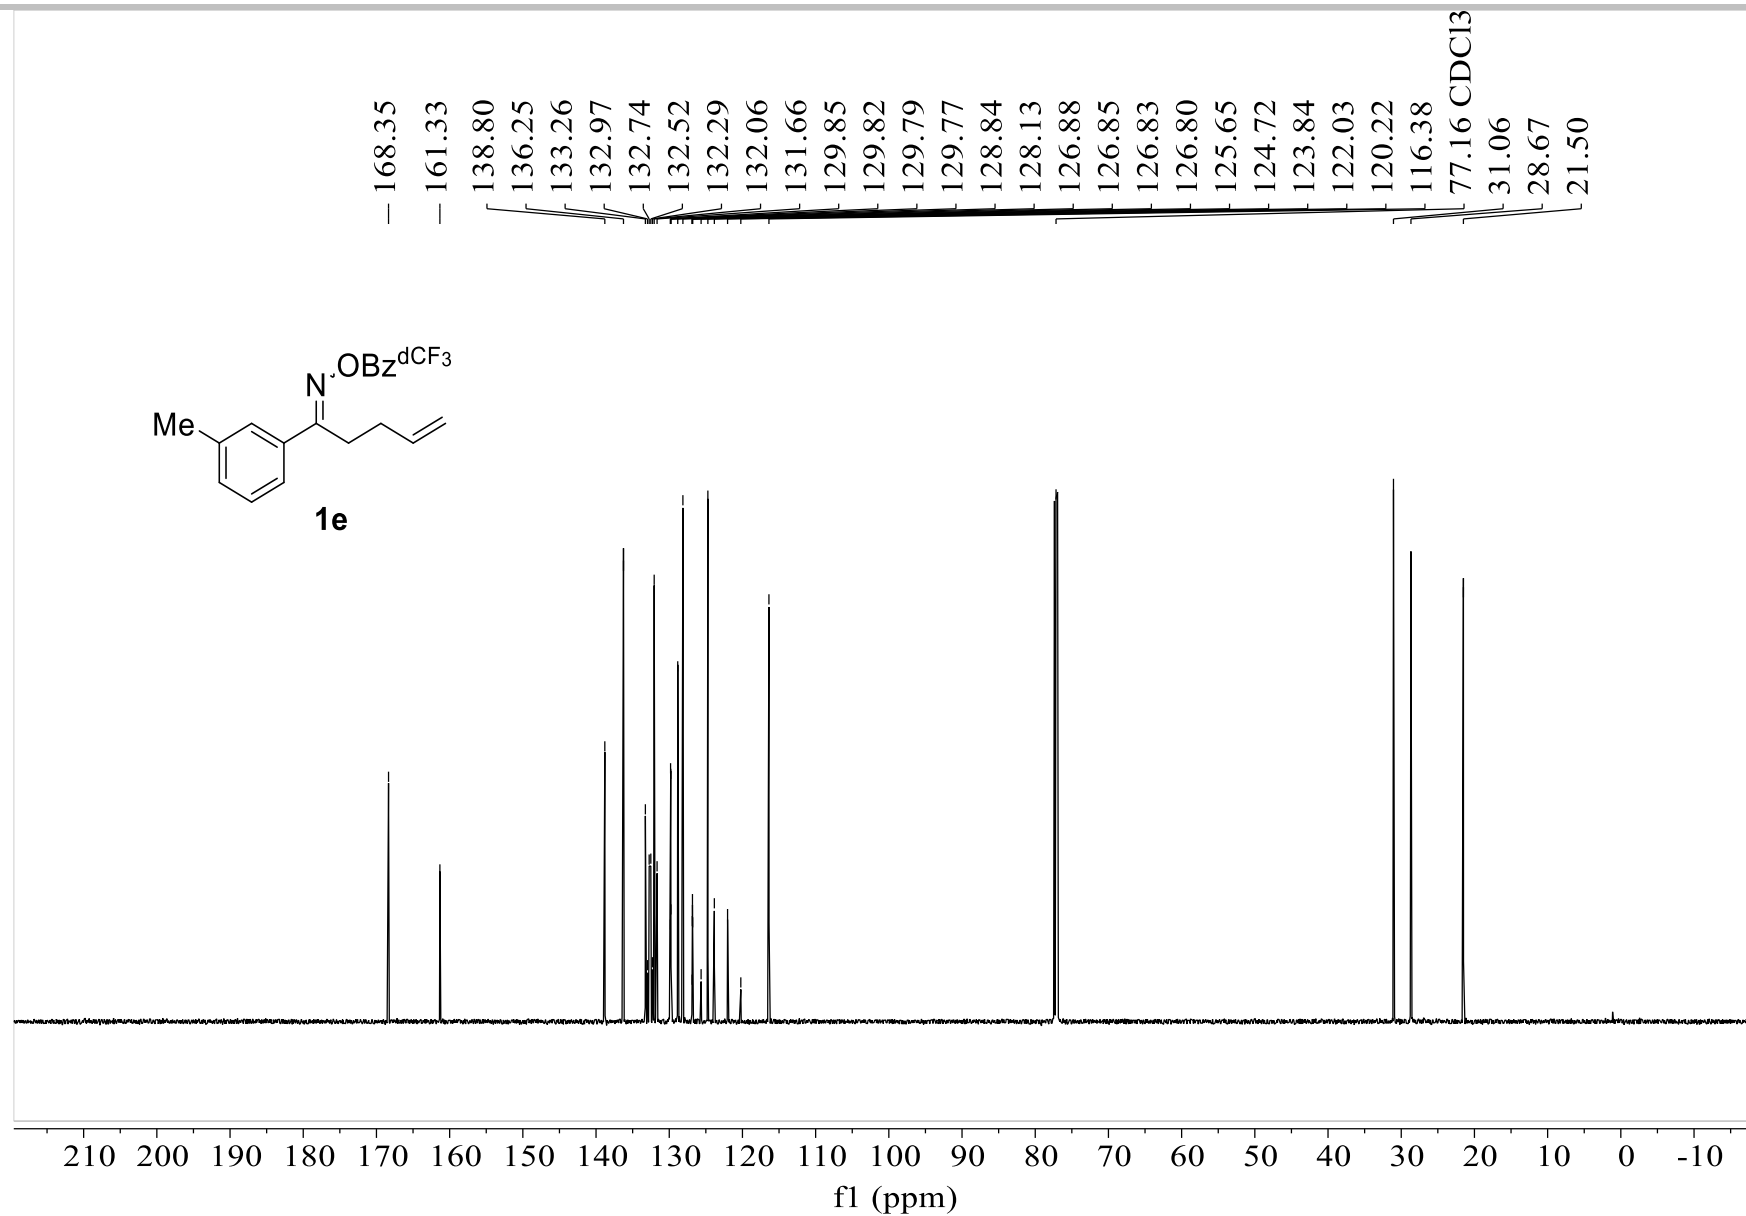

SUPPORTING INFORMATION

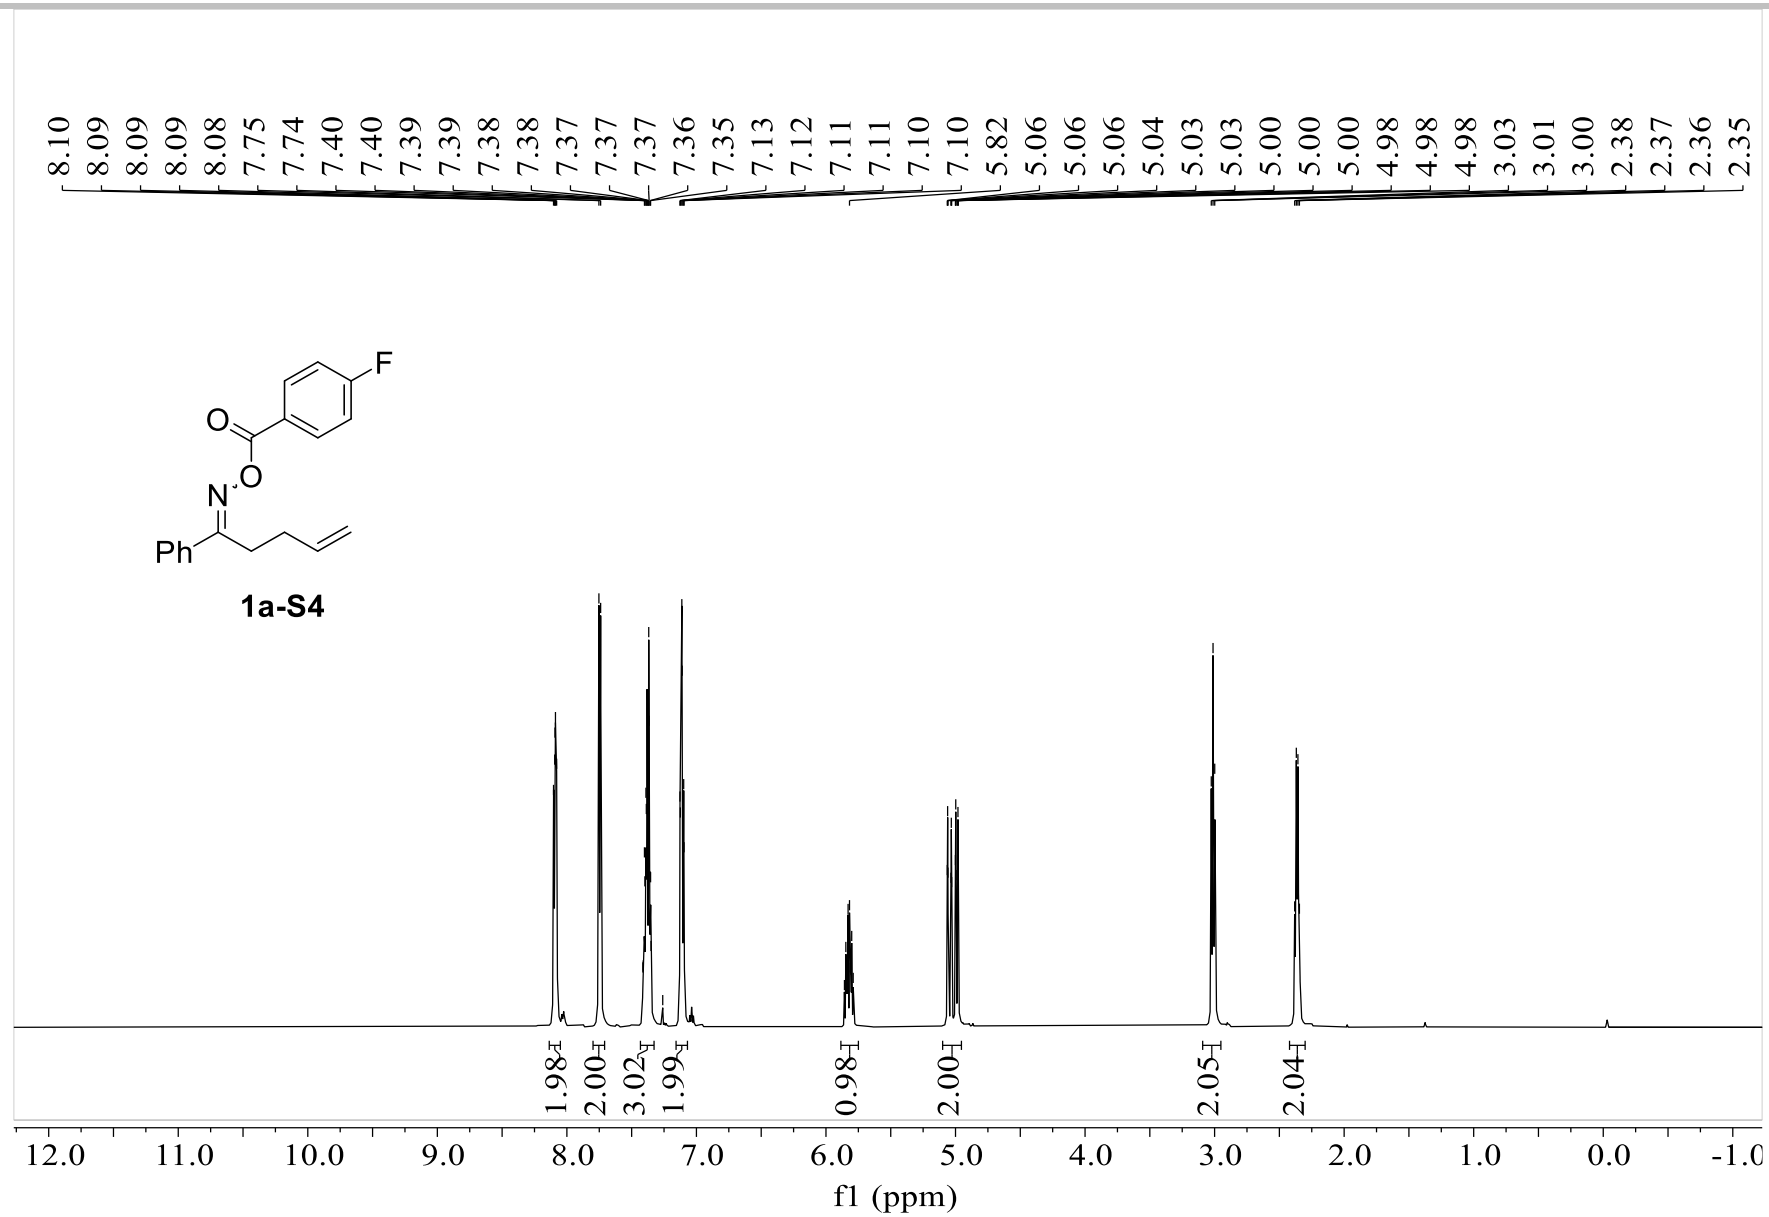



SUPPORTING INFORMATION

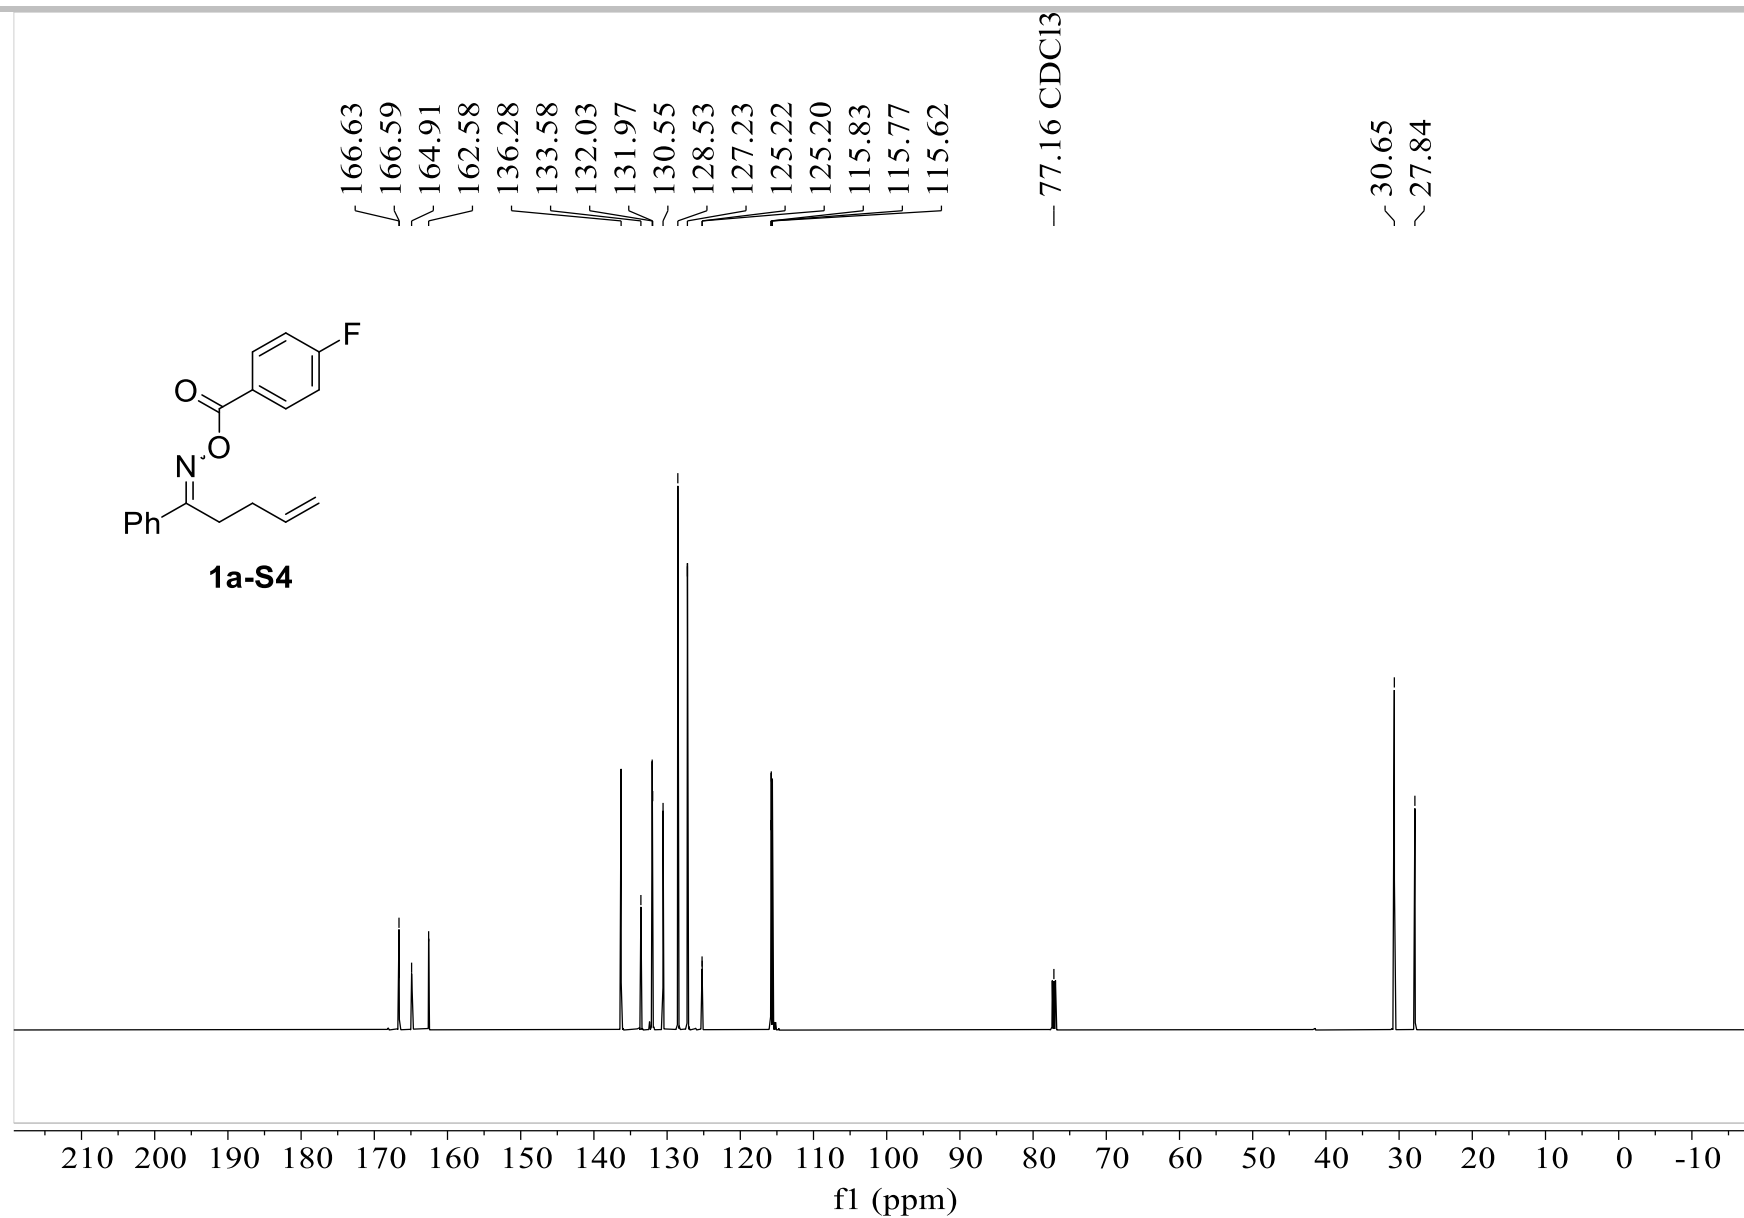

SUPPORTING INFORMATION

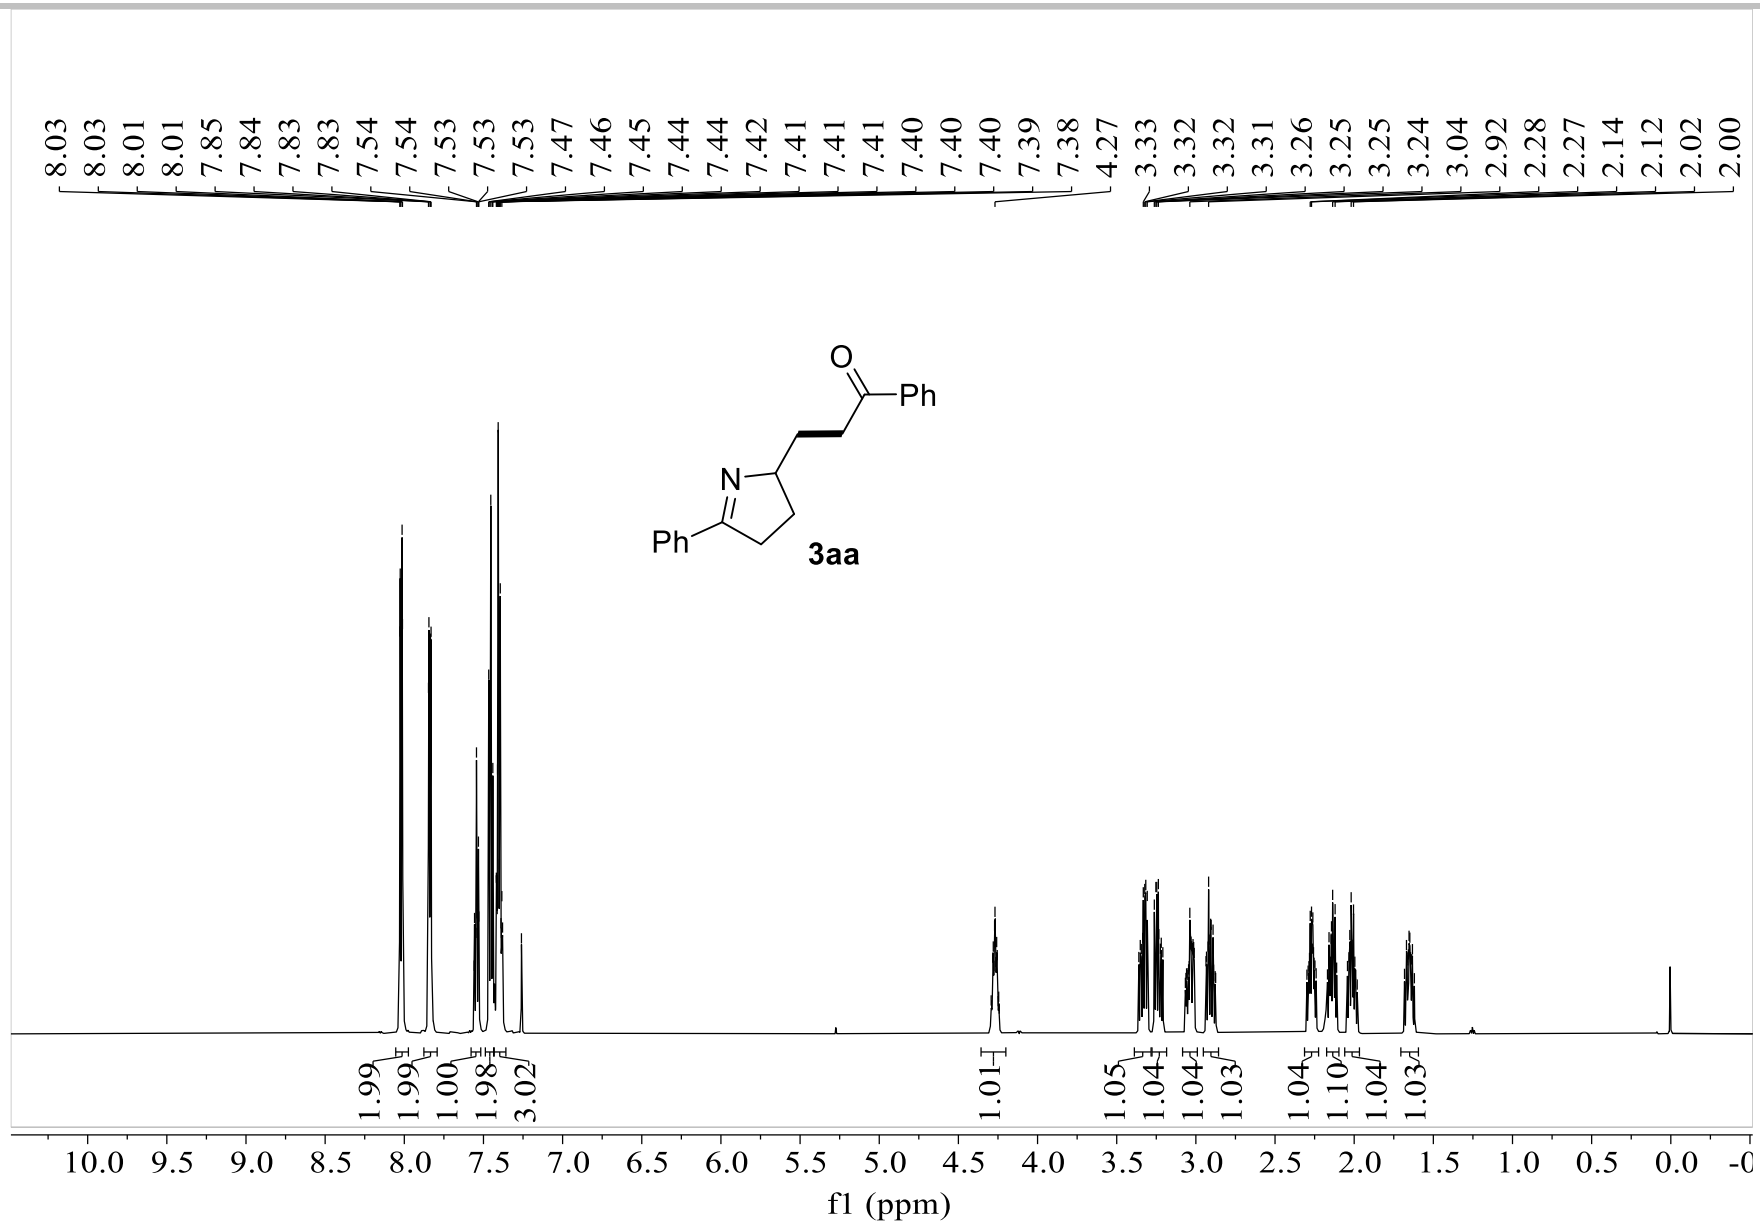

# SUPPORTING INFORMATION

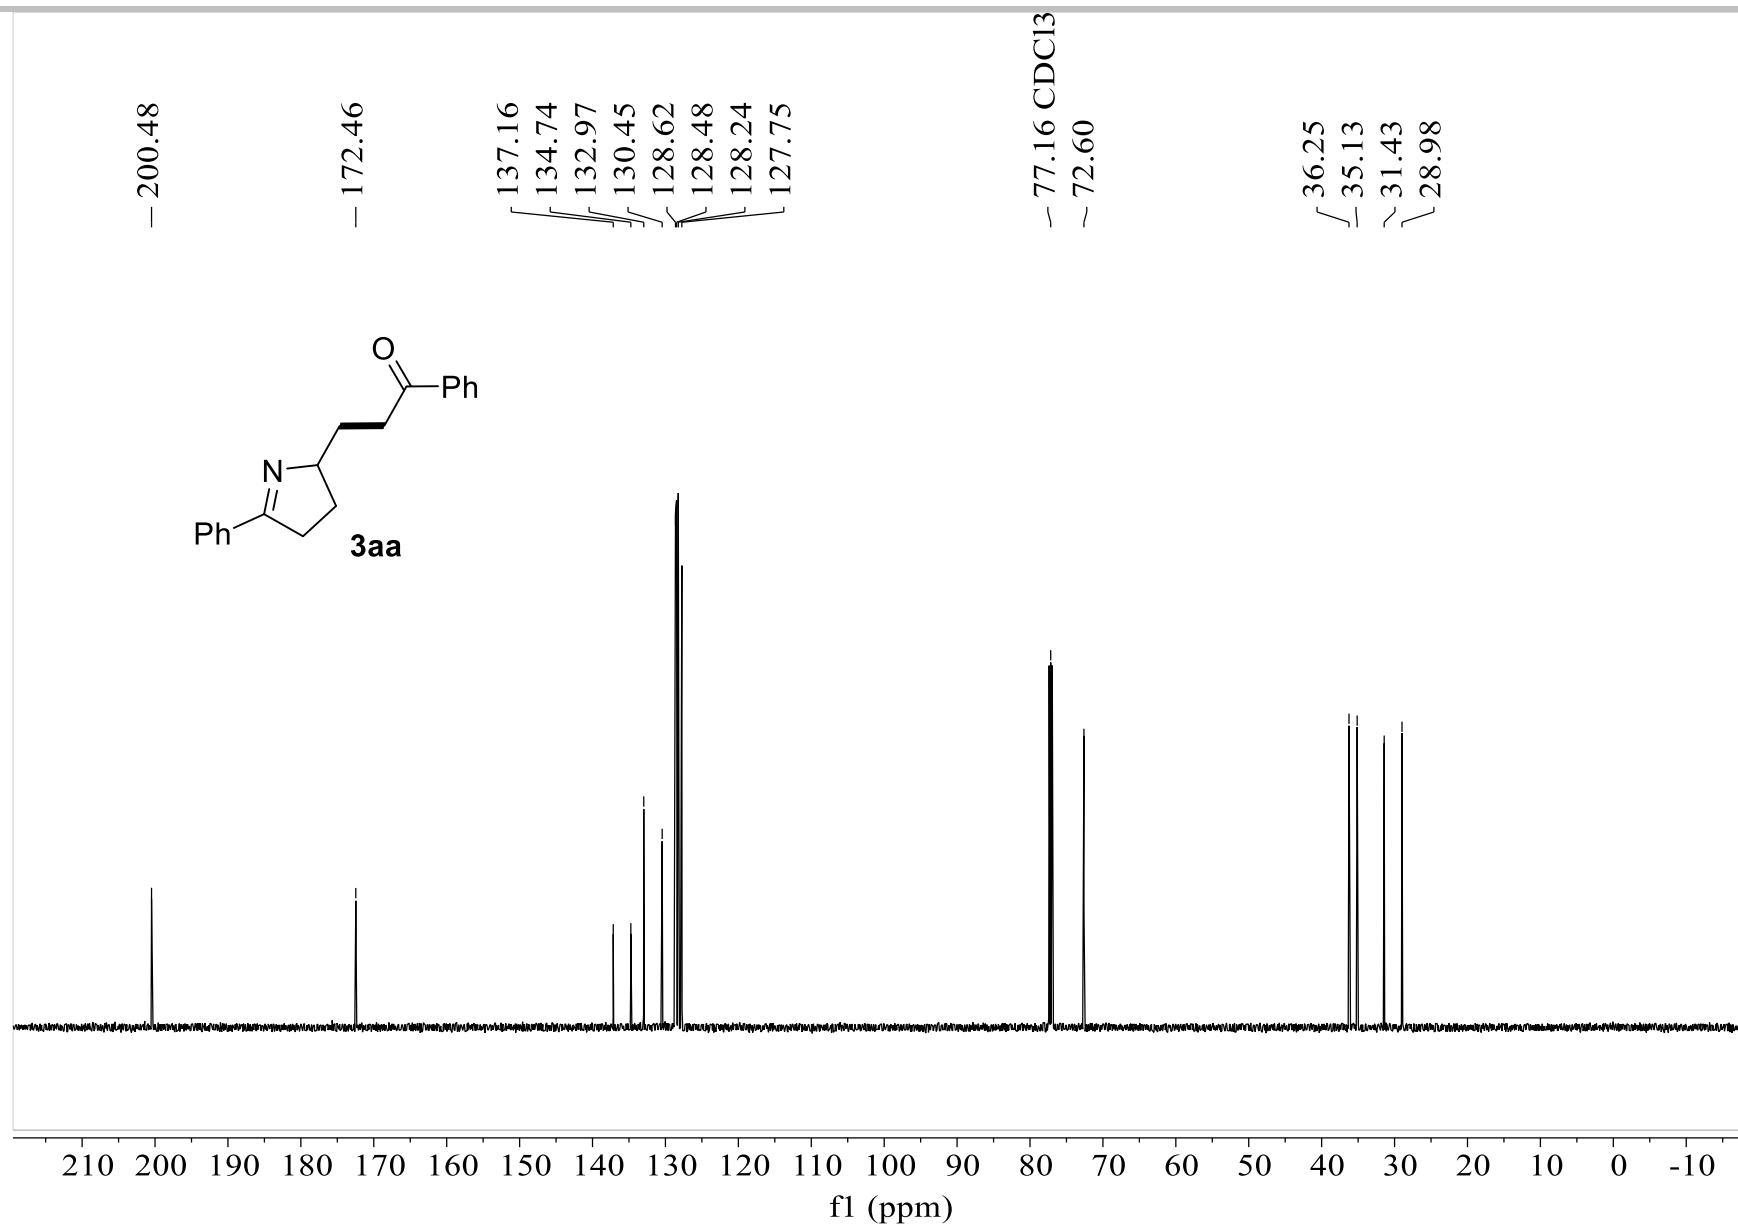

SUPPORTING INFORMATION

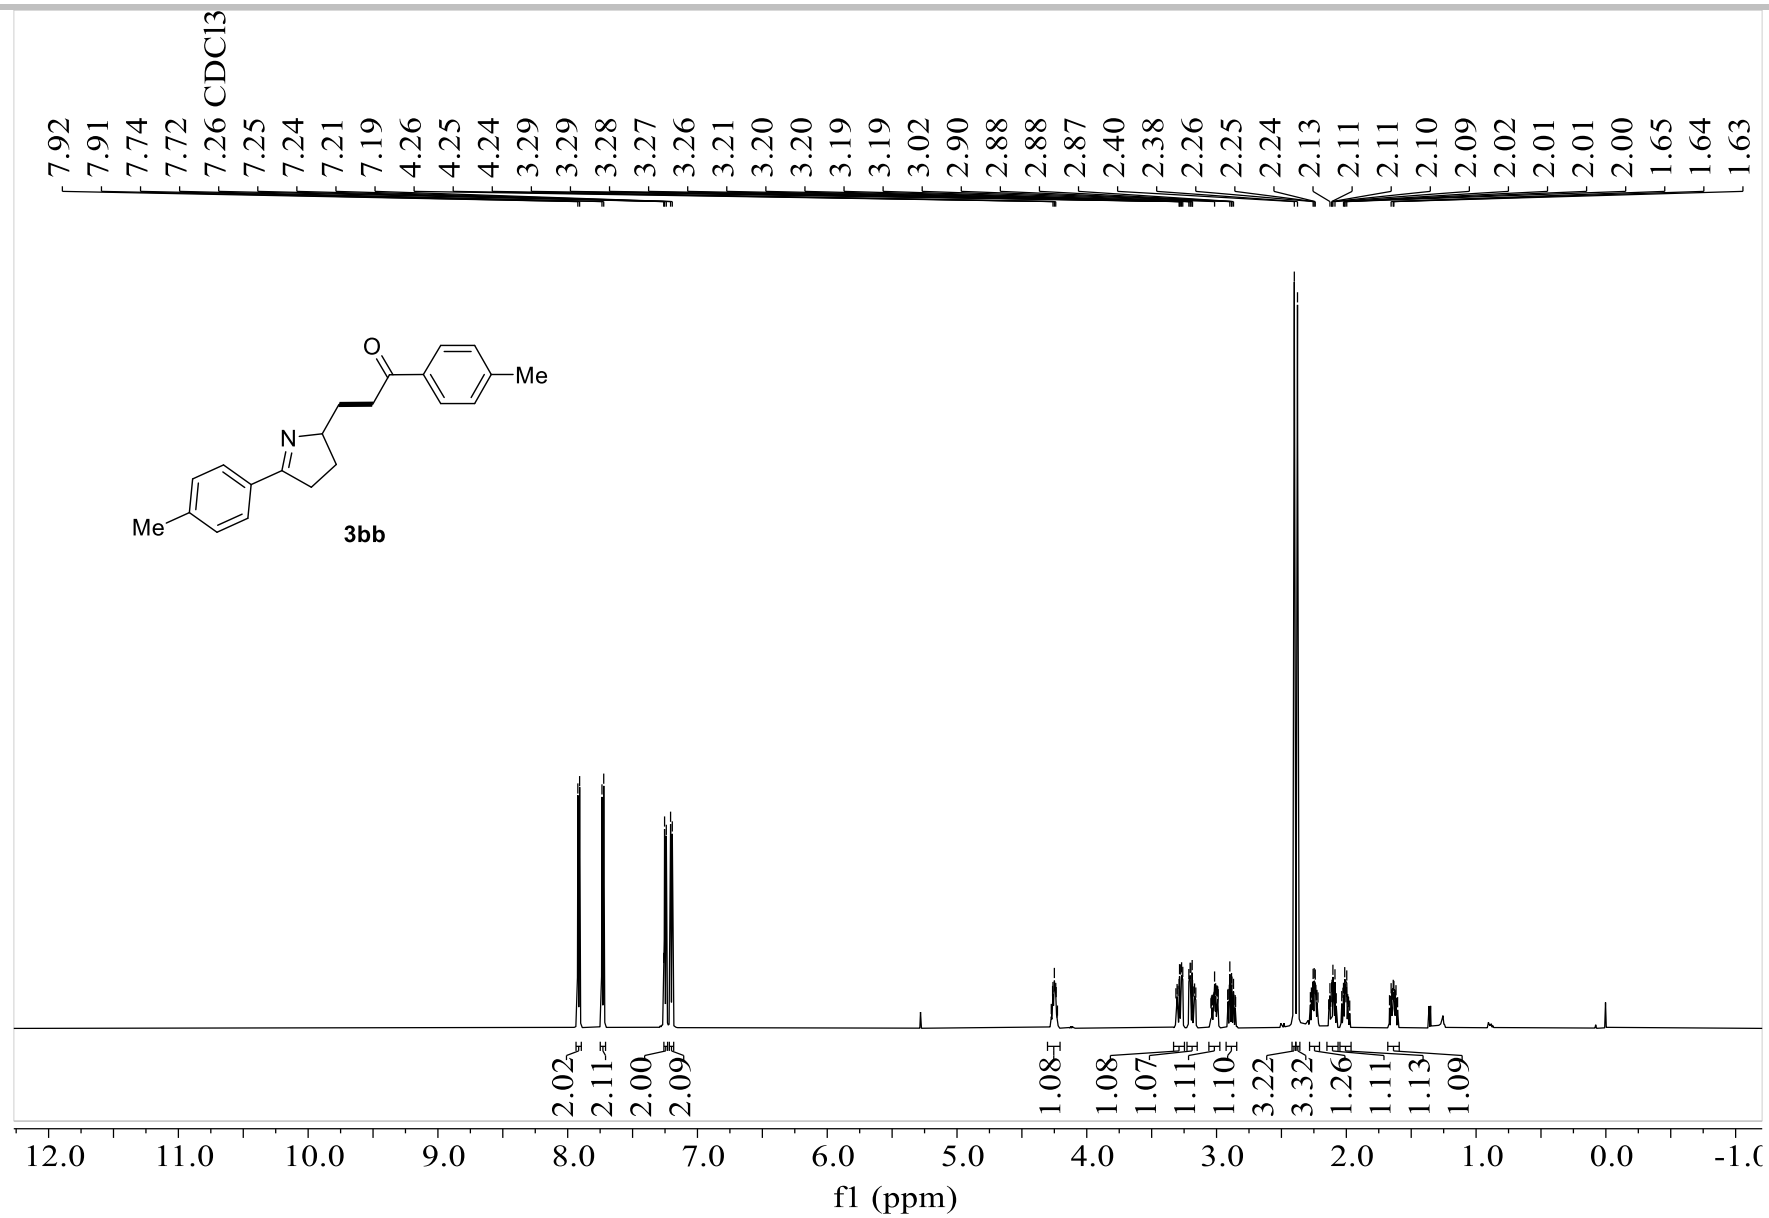

SUPPORTING INFORMATION

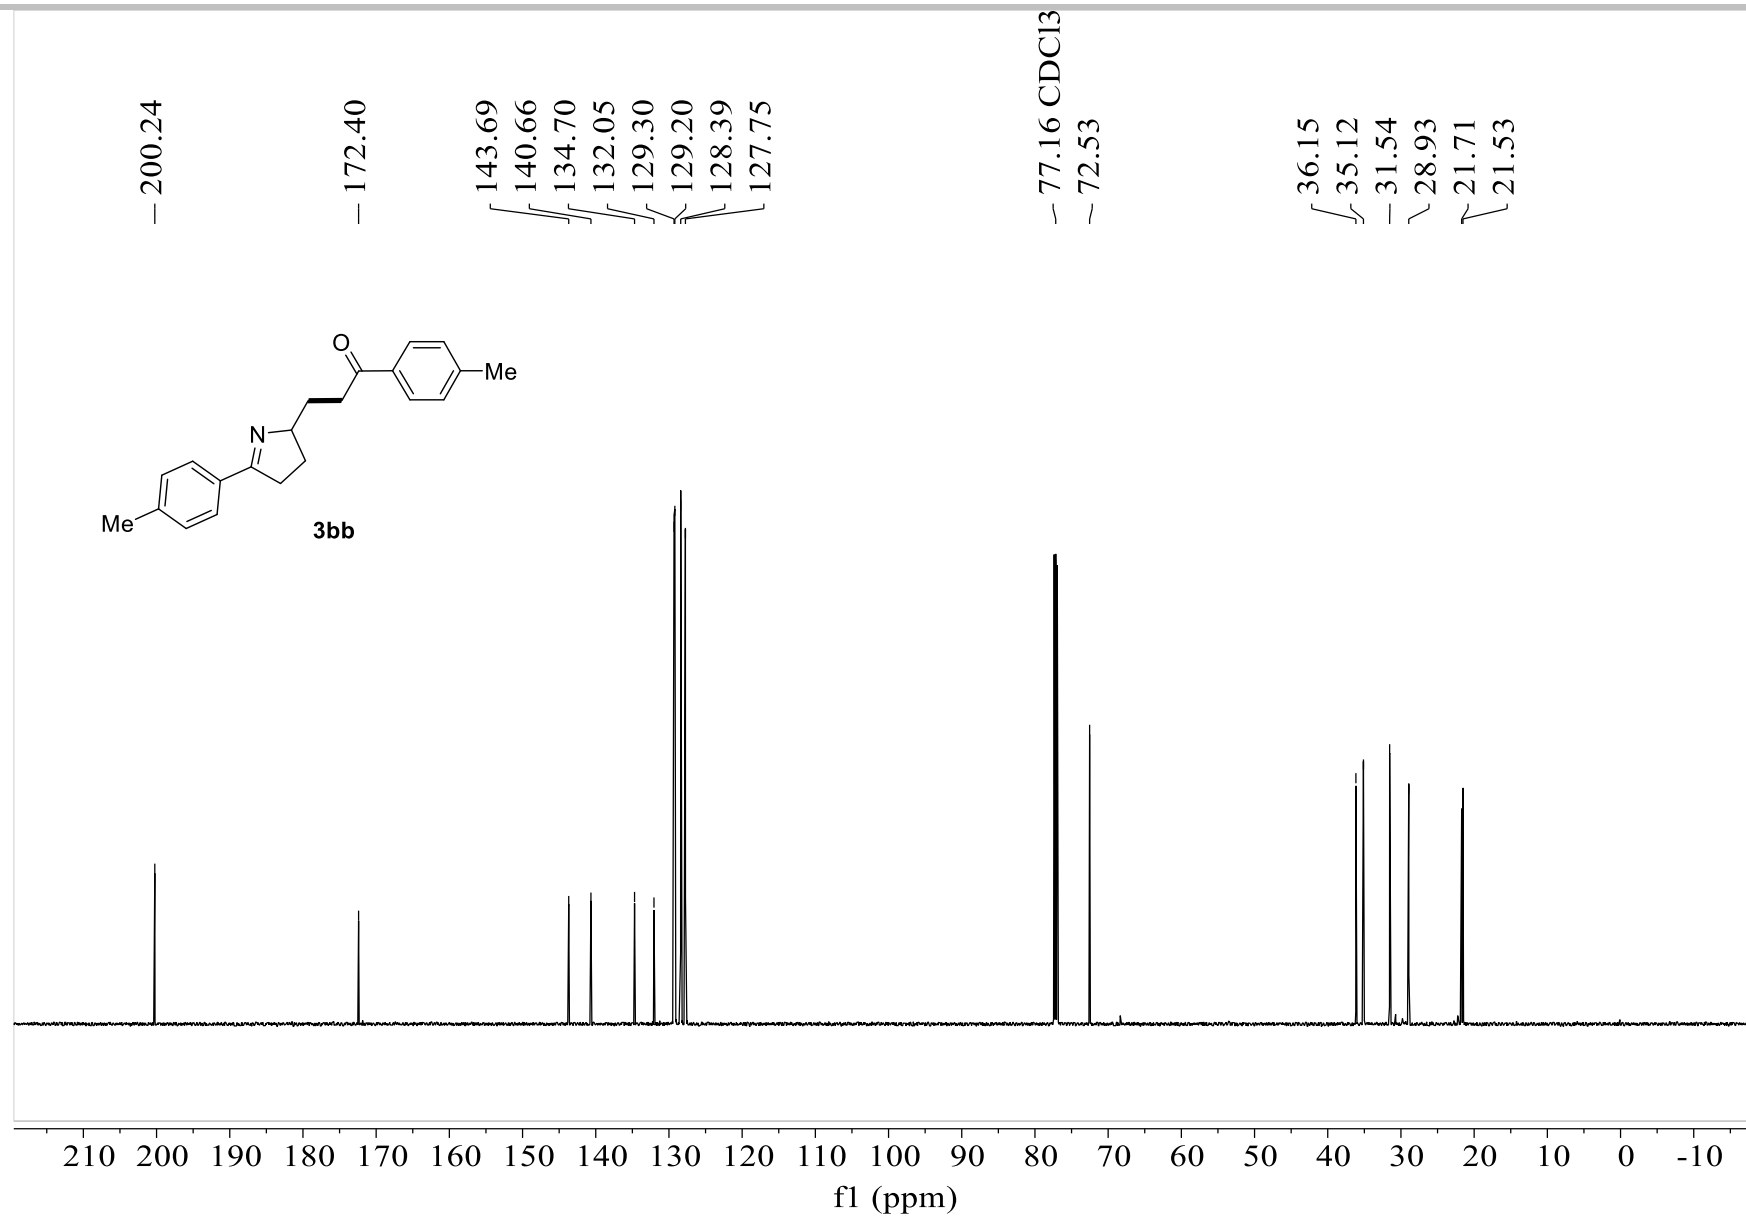

SUPPORTING INFORMATION

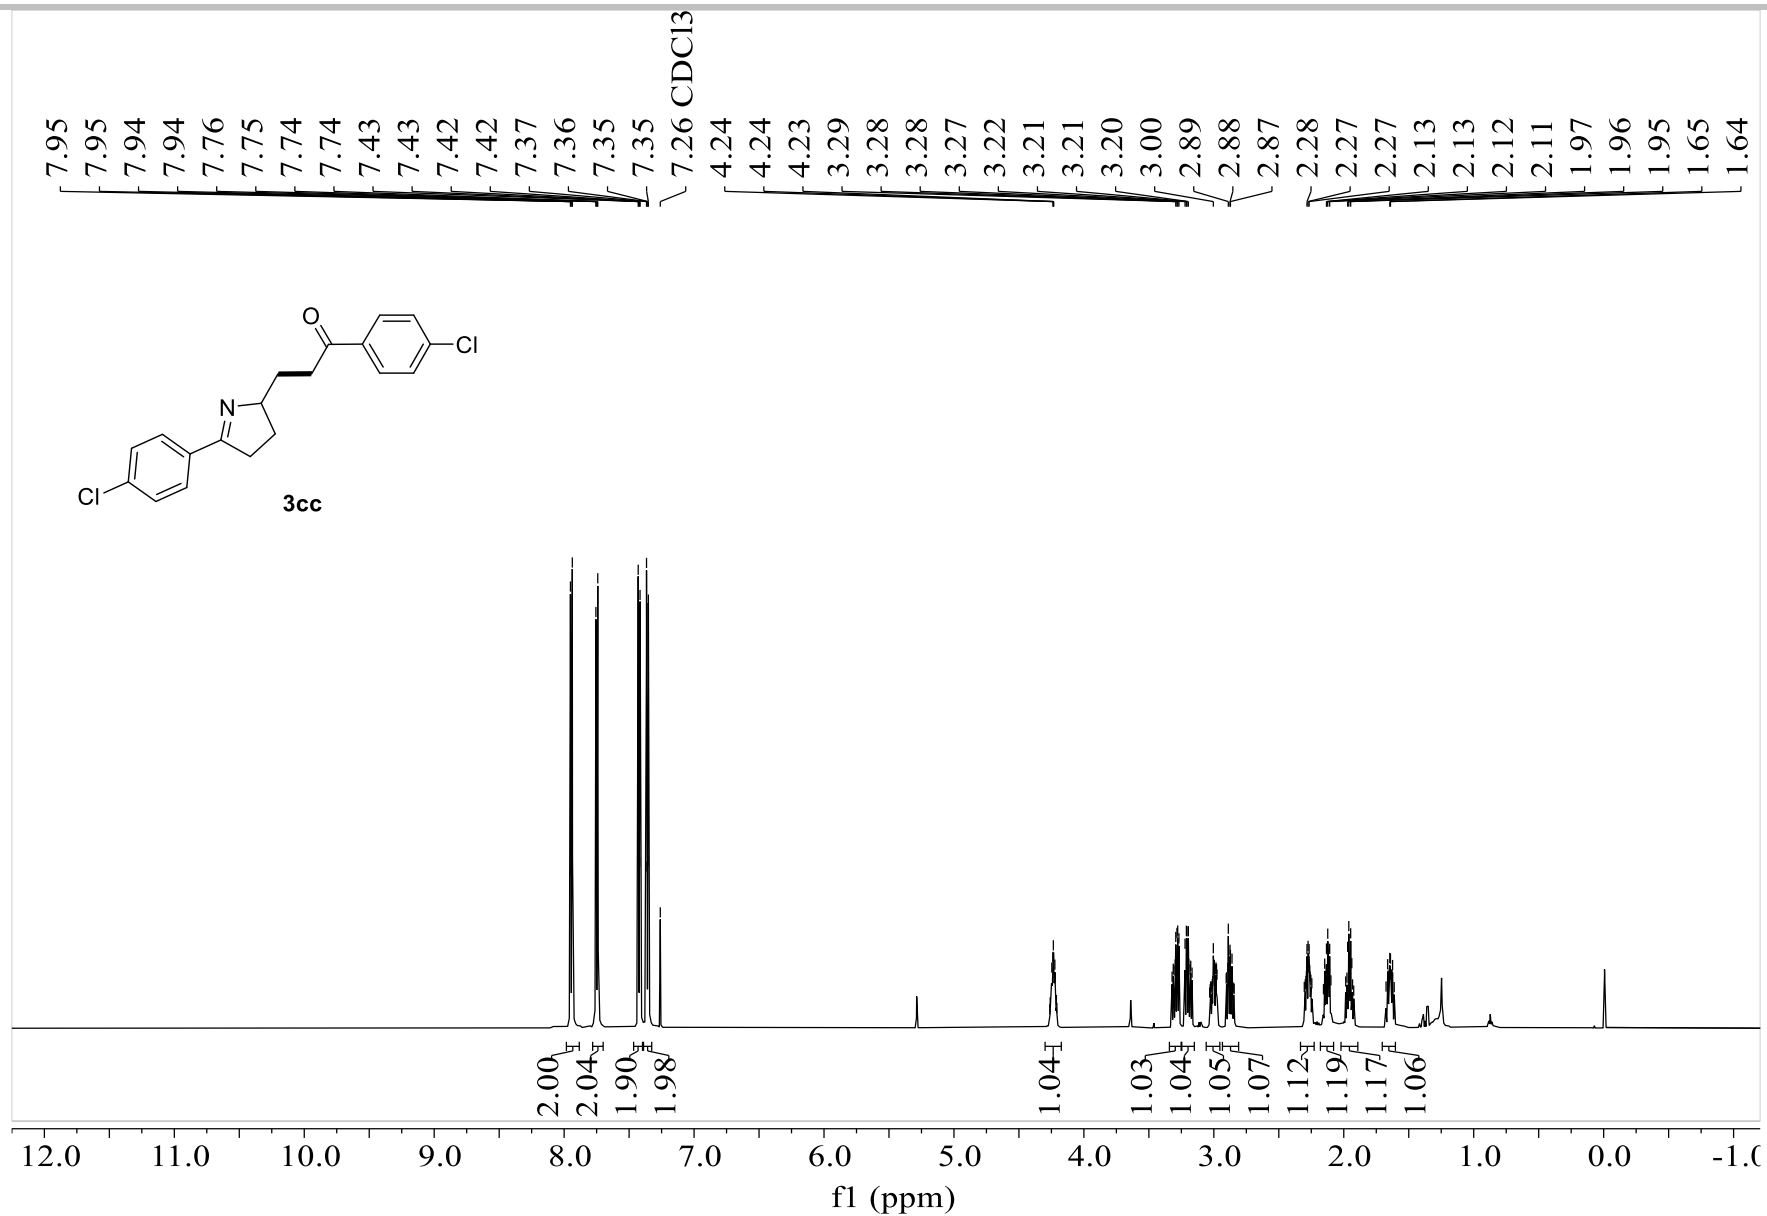

SUPPORTING INFORMATION

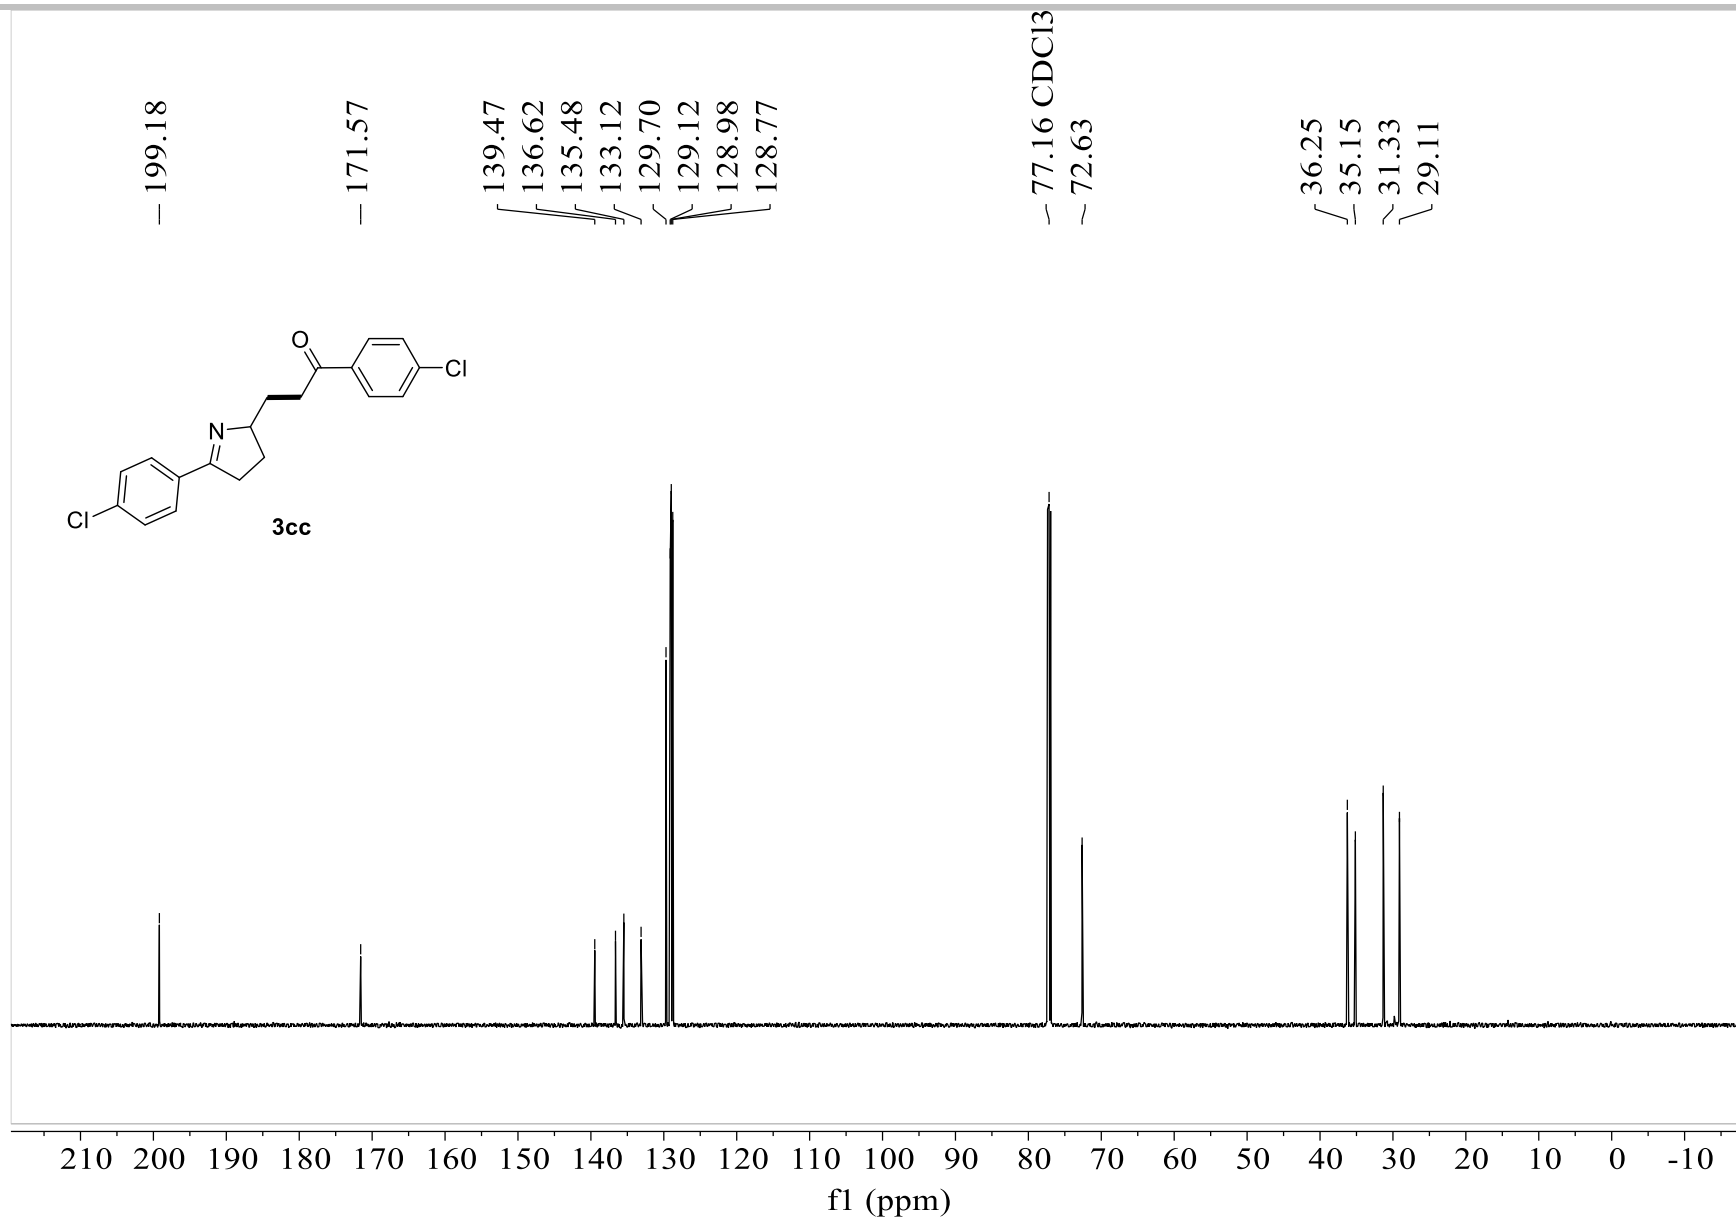

SUPPORTING INFORMATION

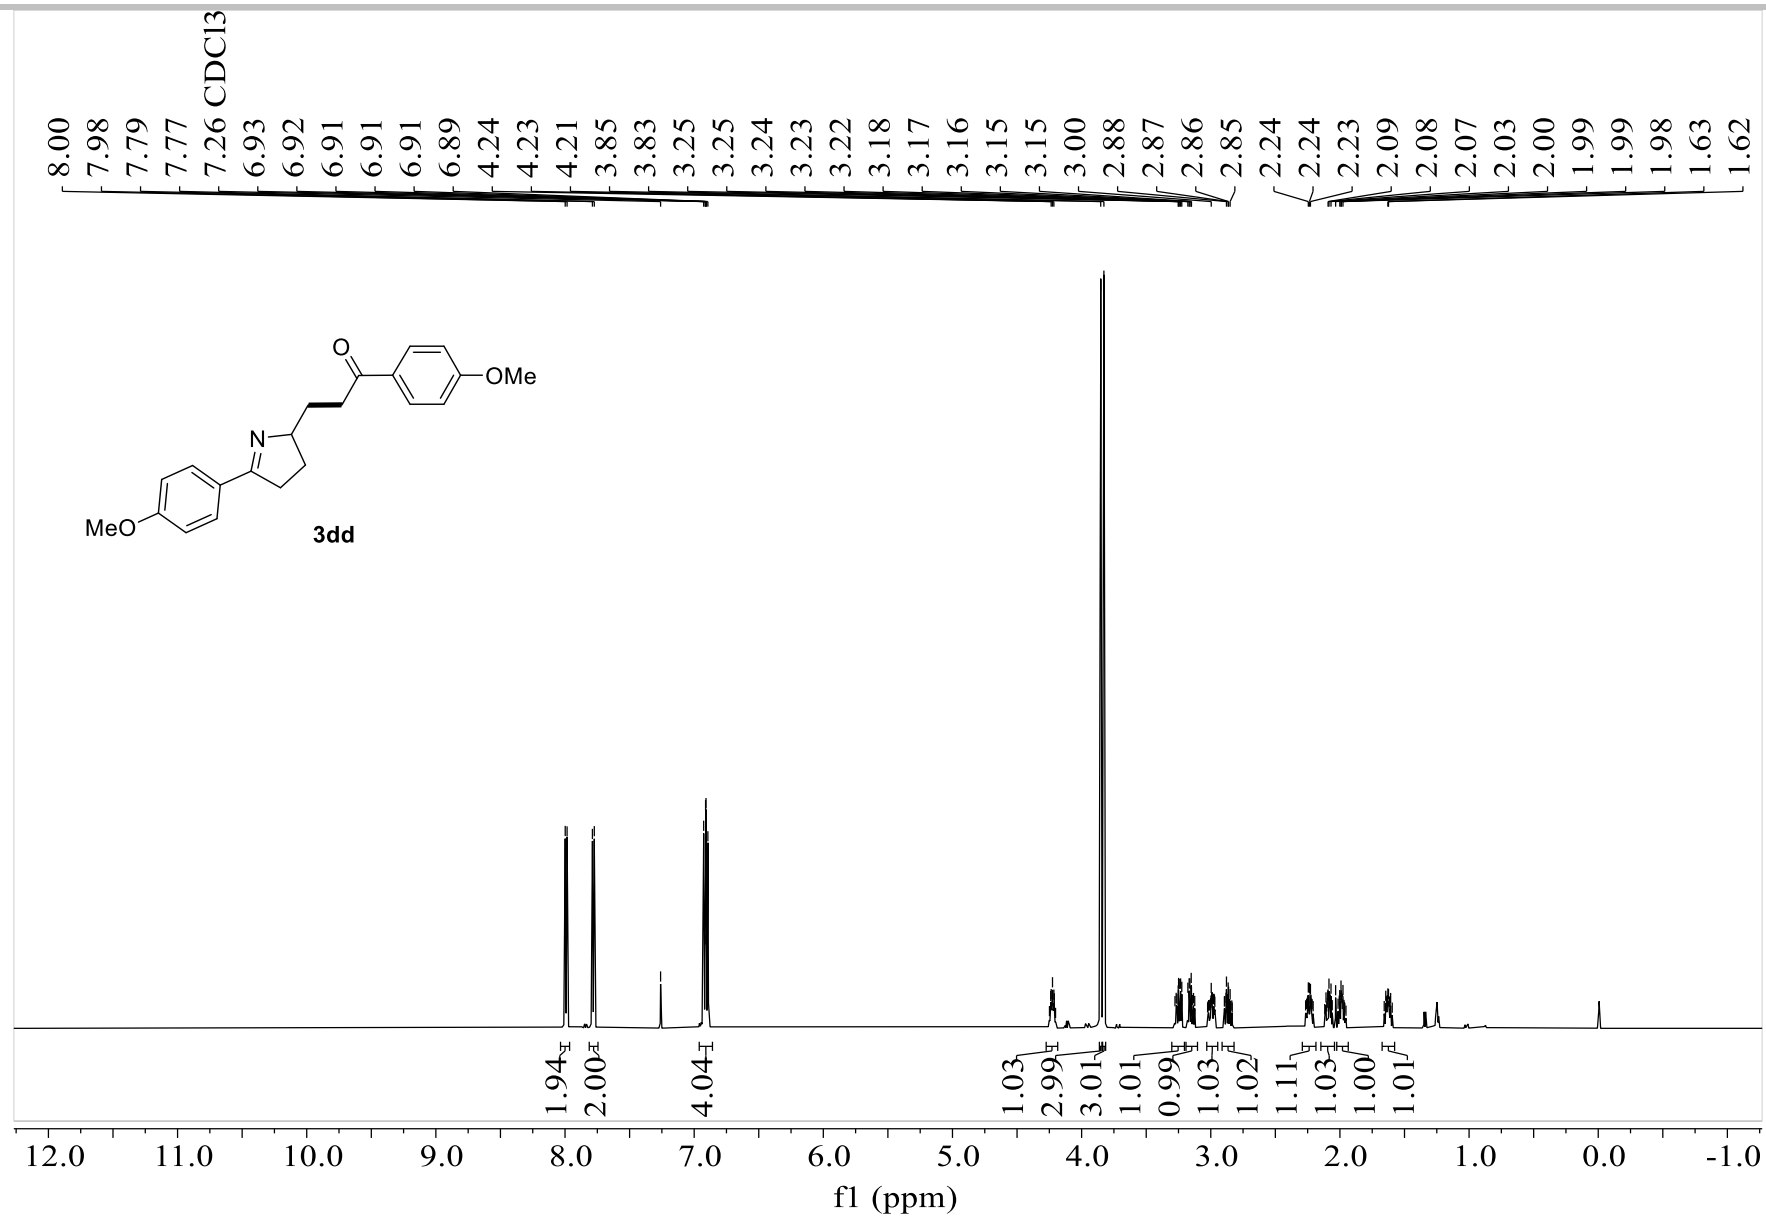



SUPPORTING INFORMATION

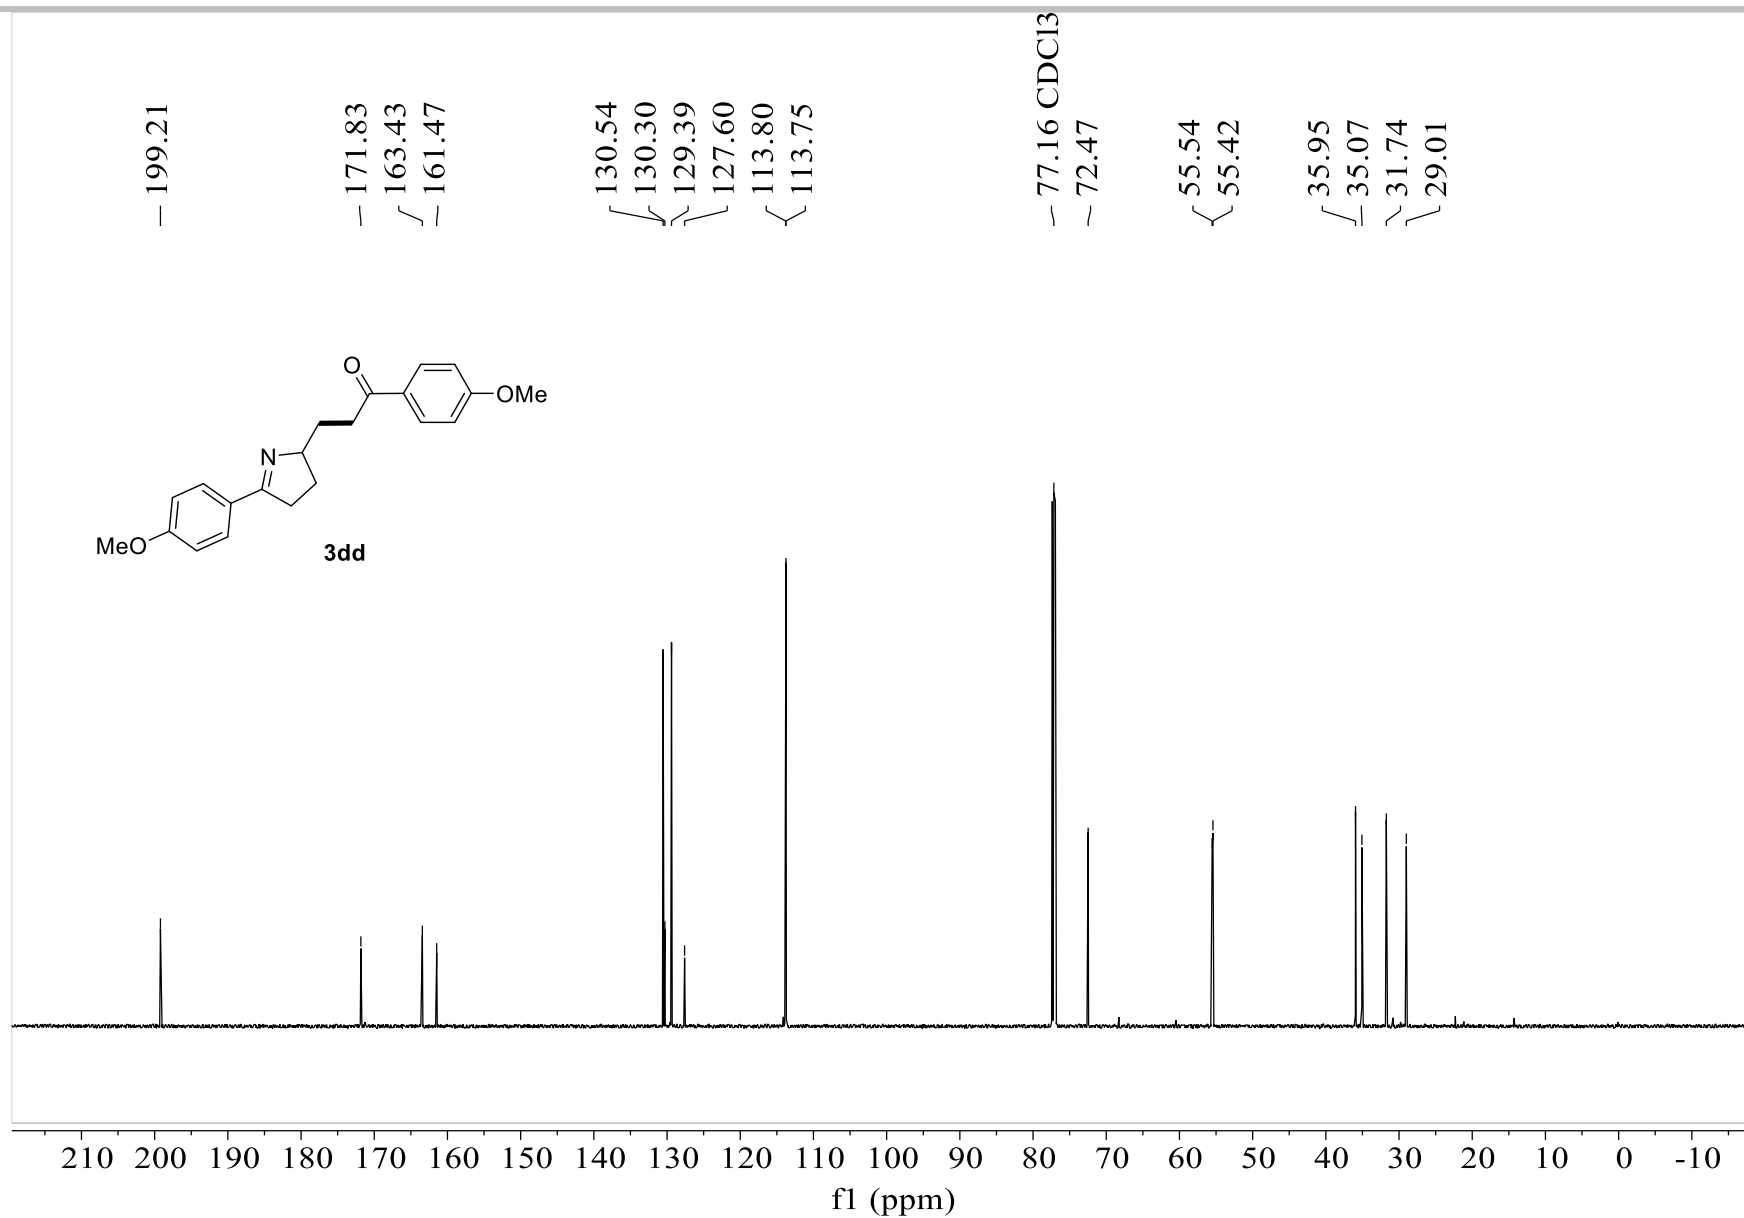

SUPPORTING INFORMATION

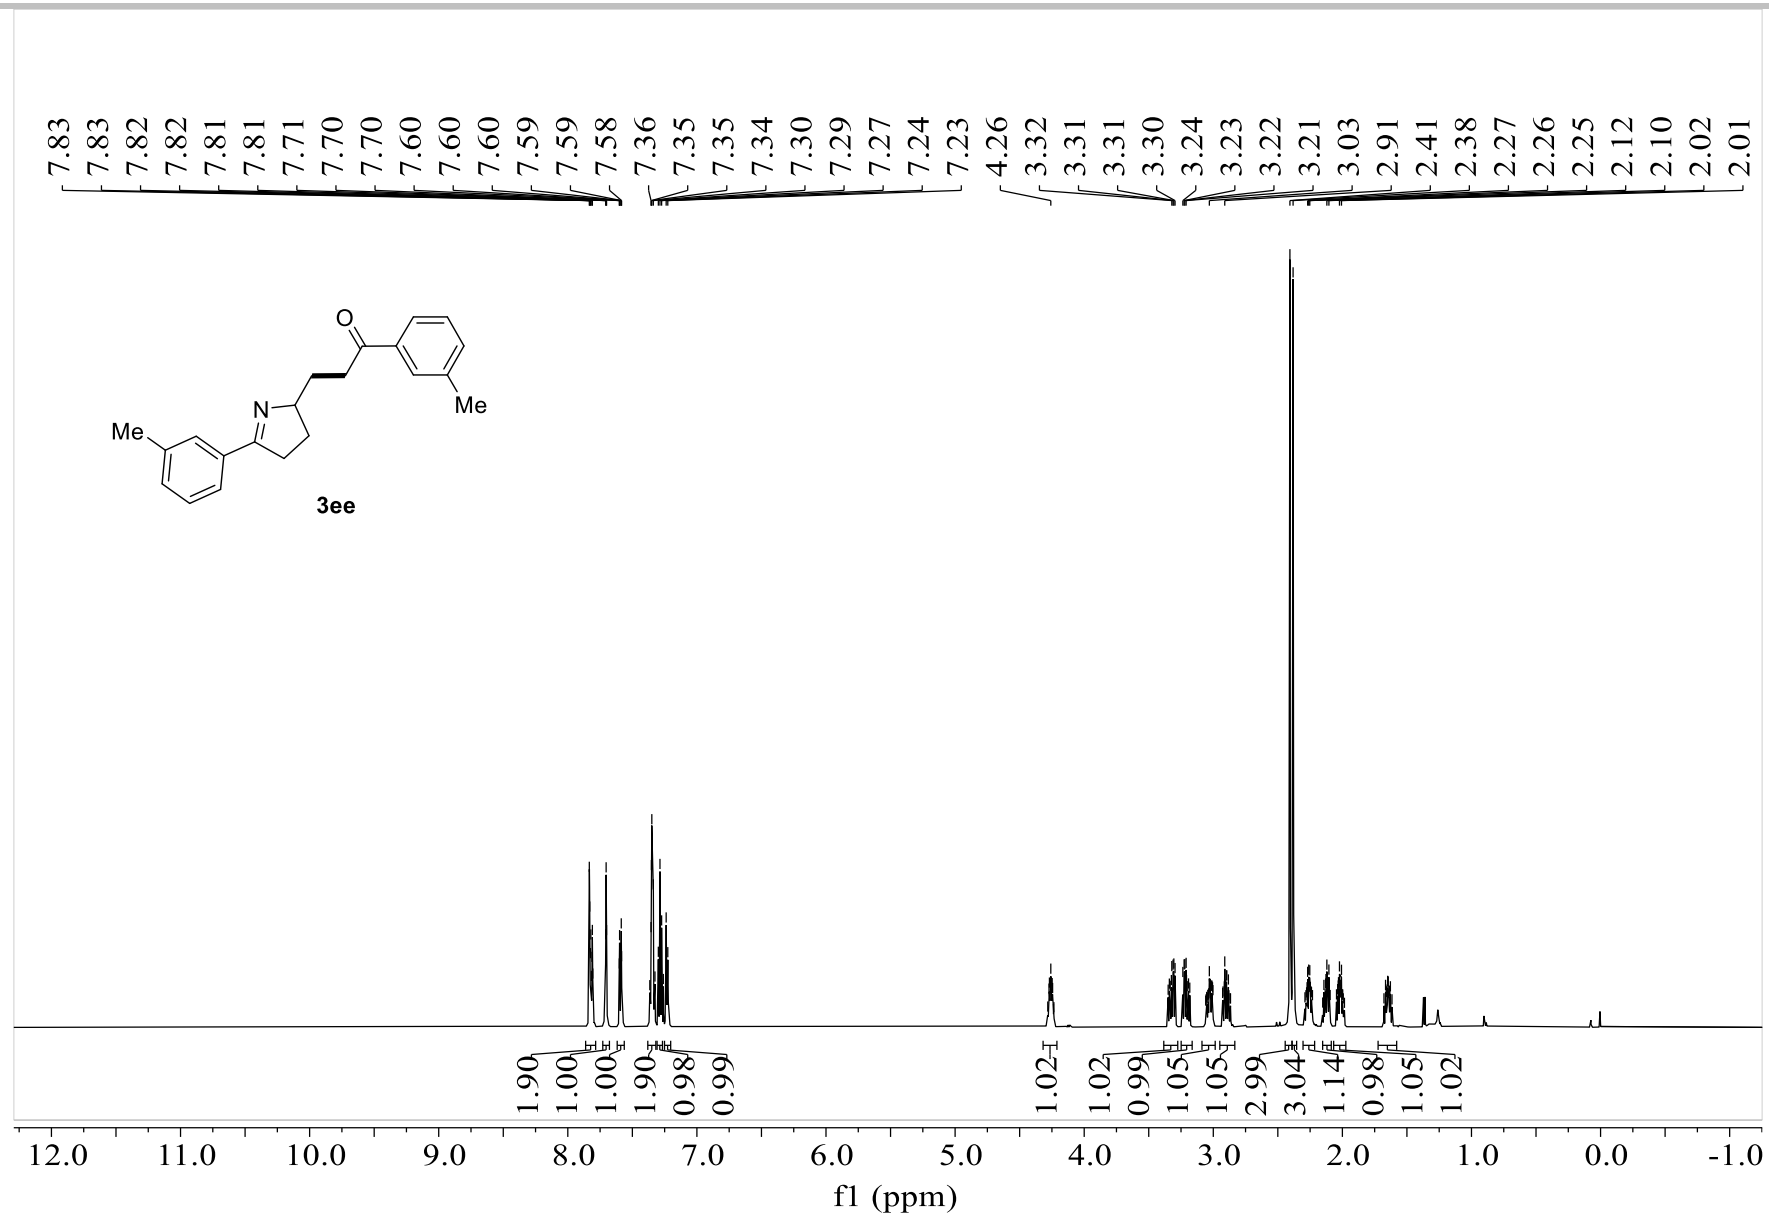

SUPPORTING INFORMATION

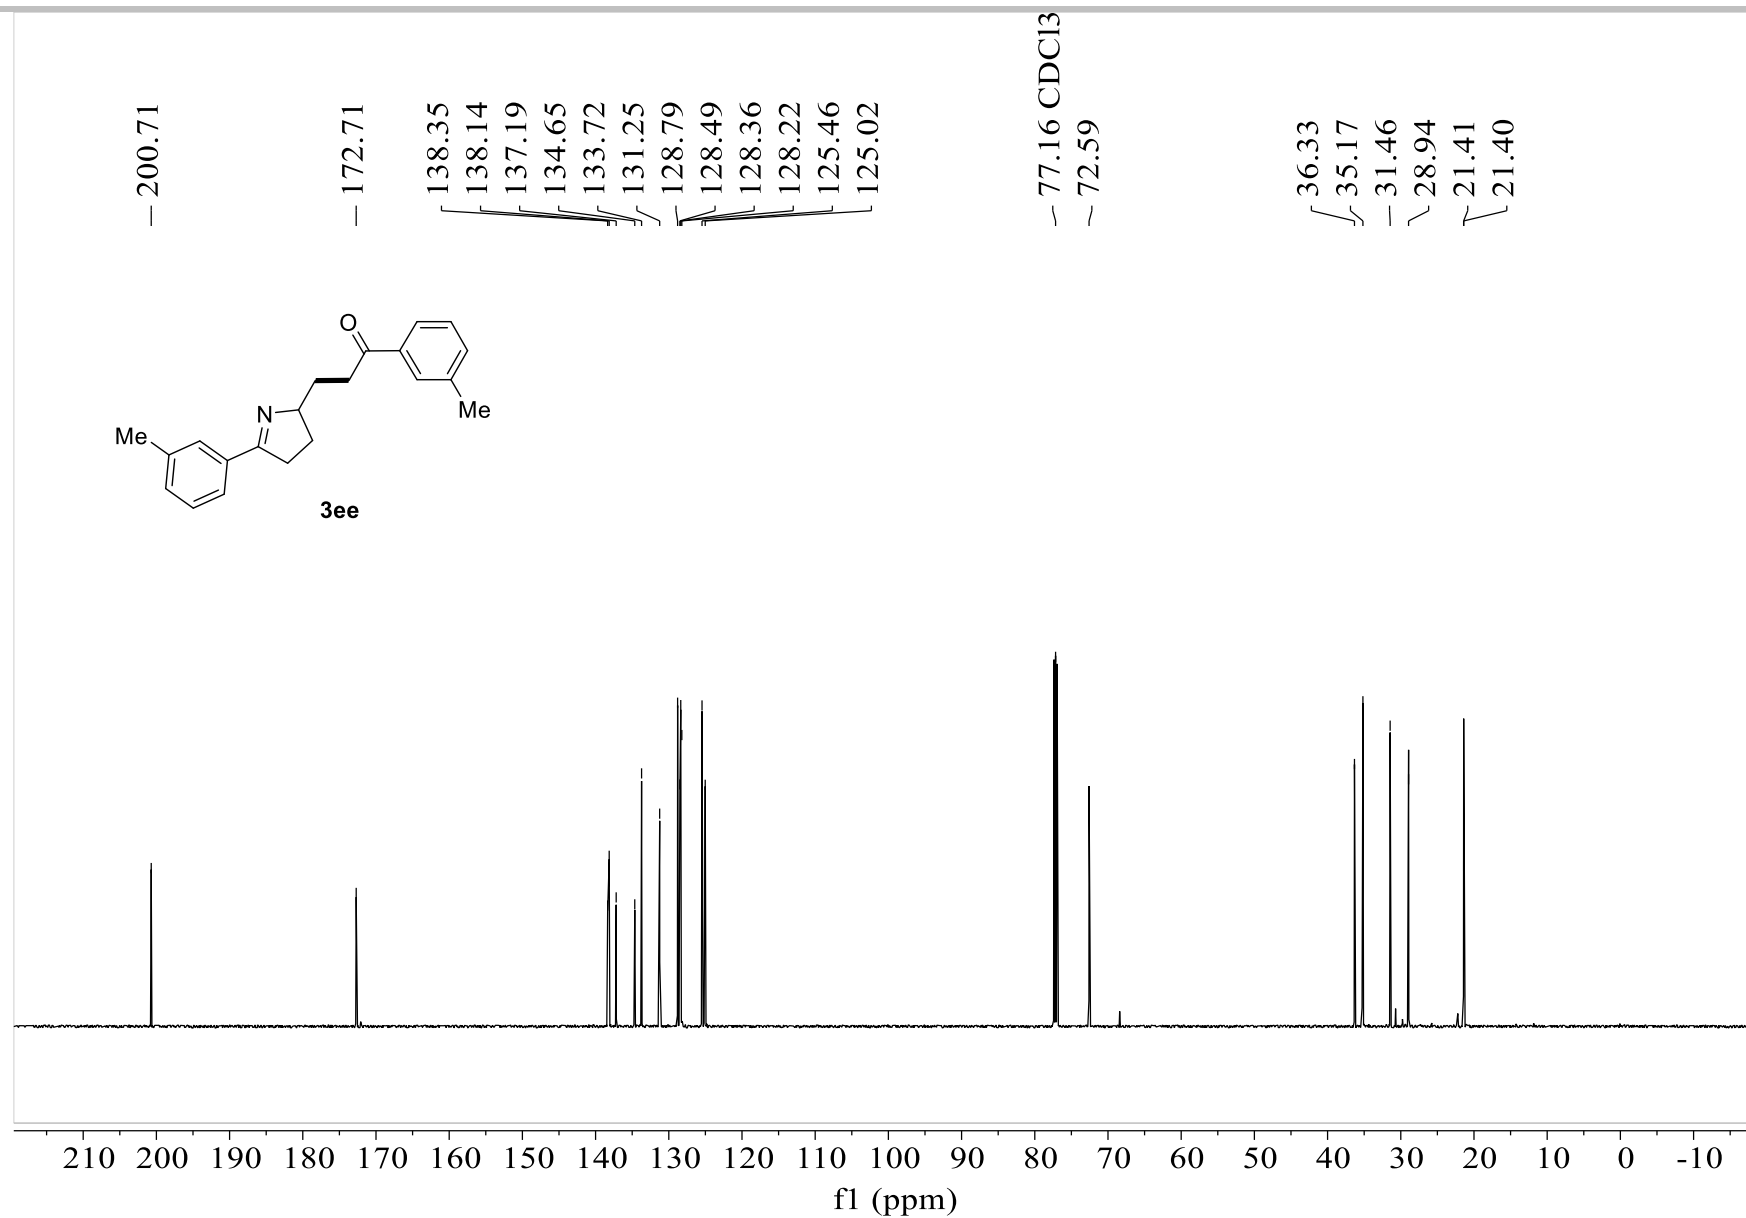

SUPPORTING INFORMATION

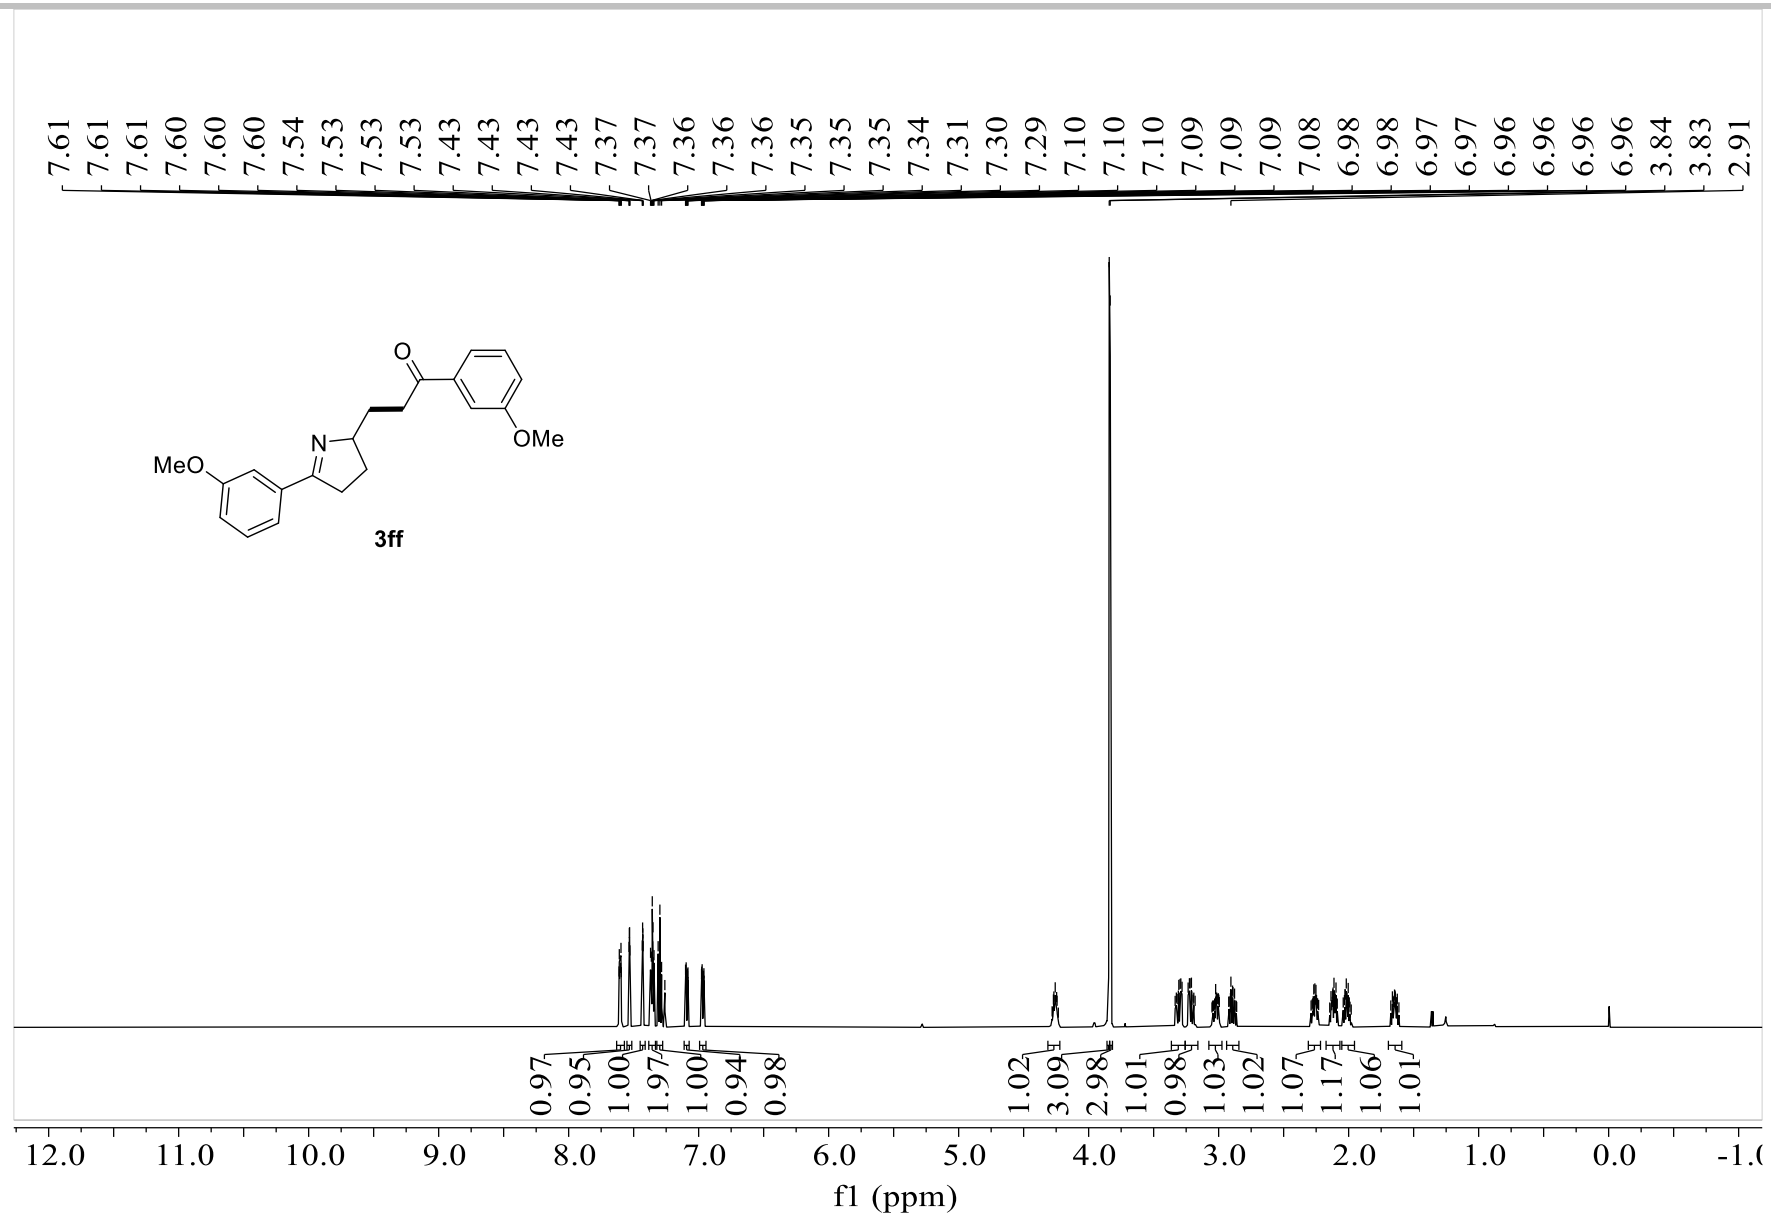

SUPPORTING INFORMATION

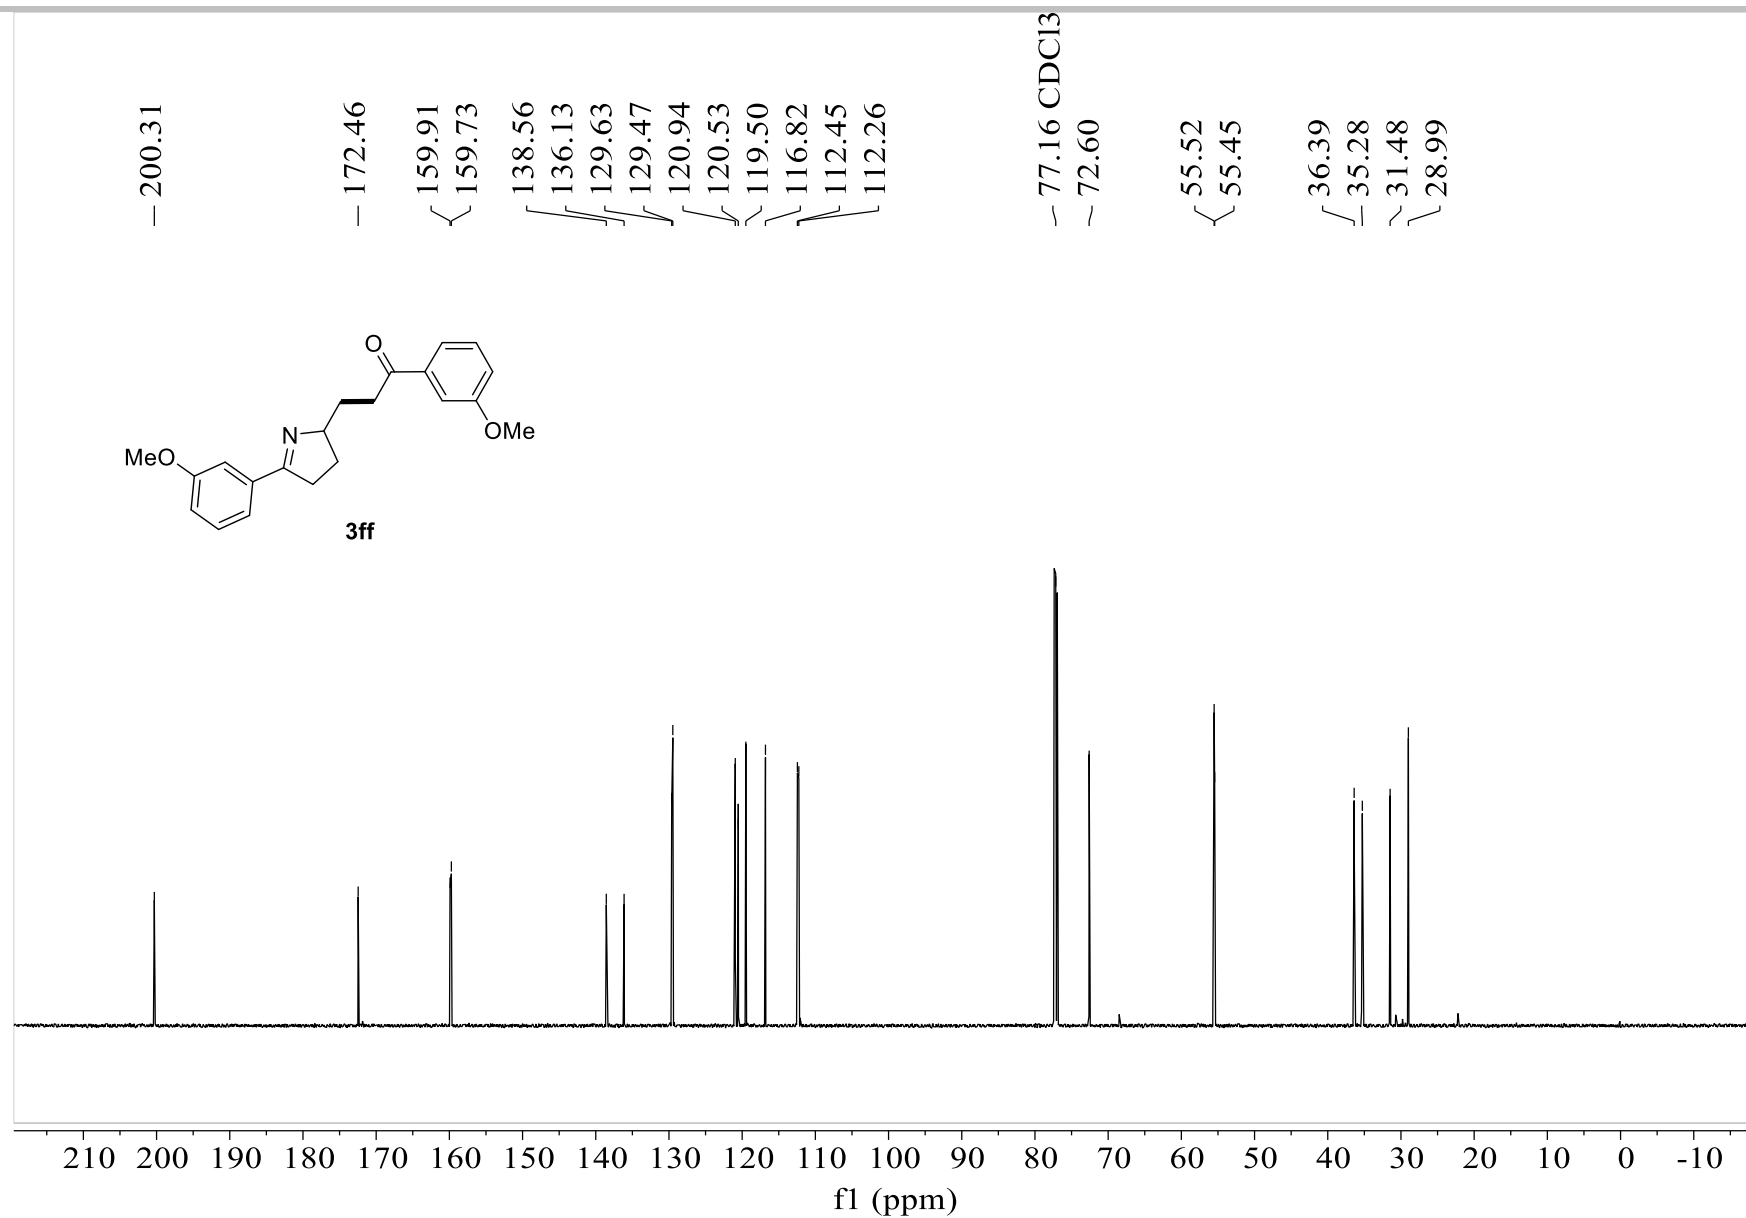

SUPPORTING INFORMATION

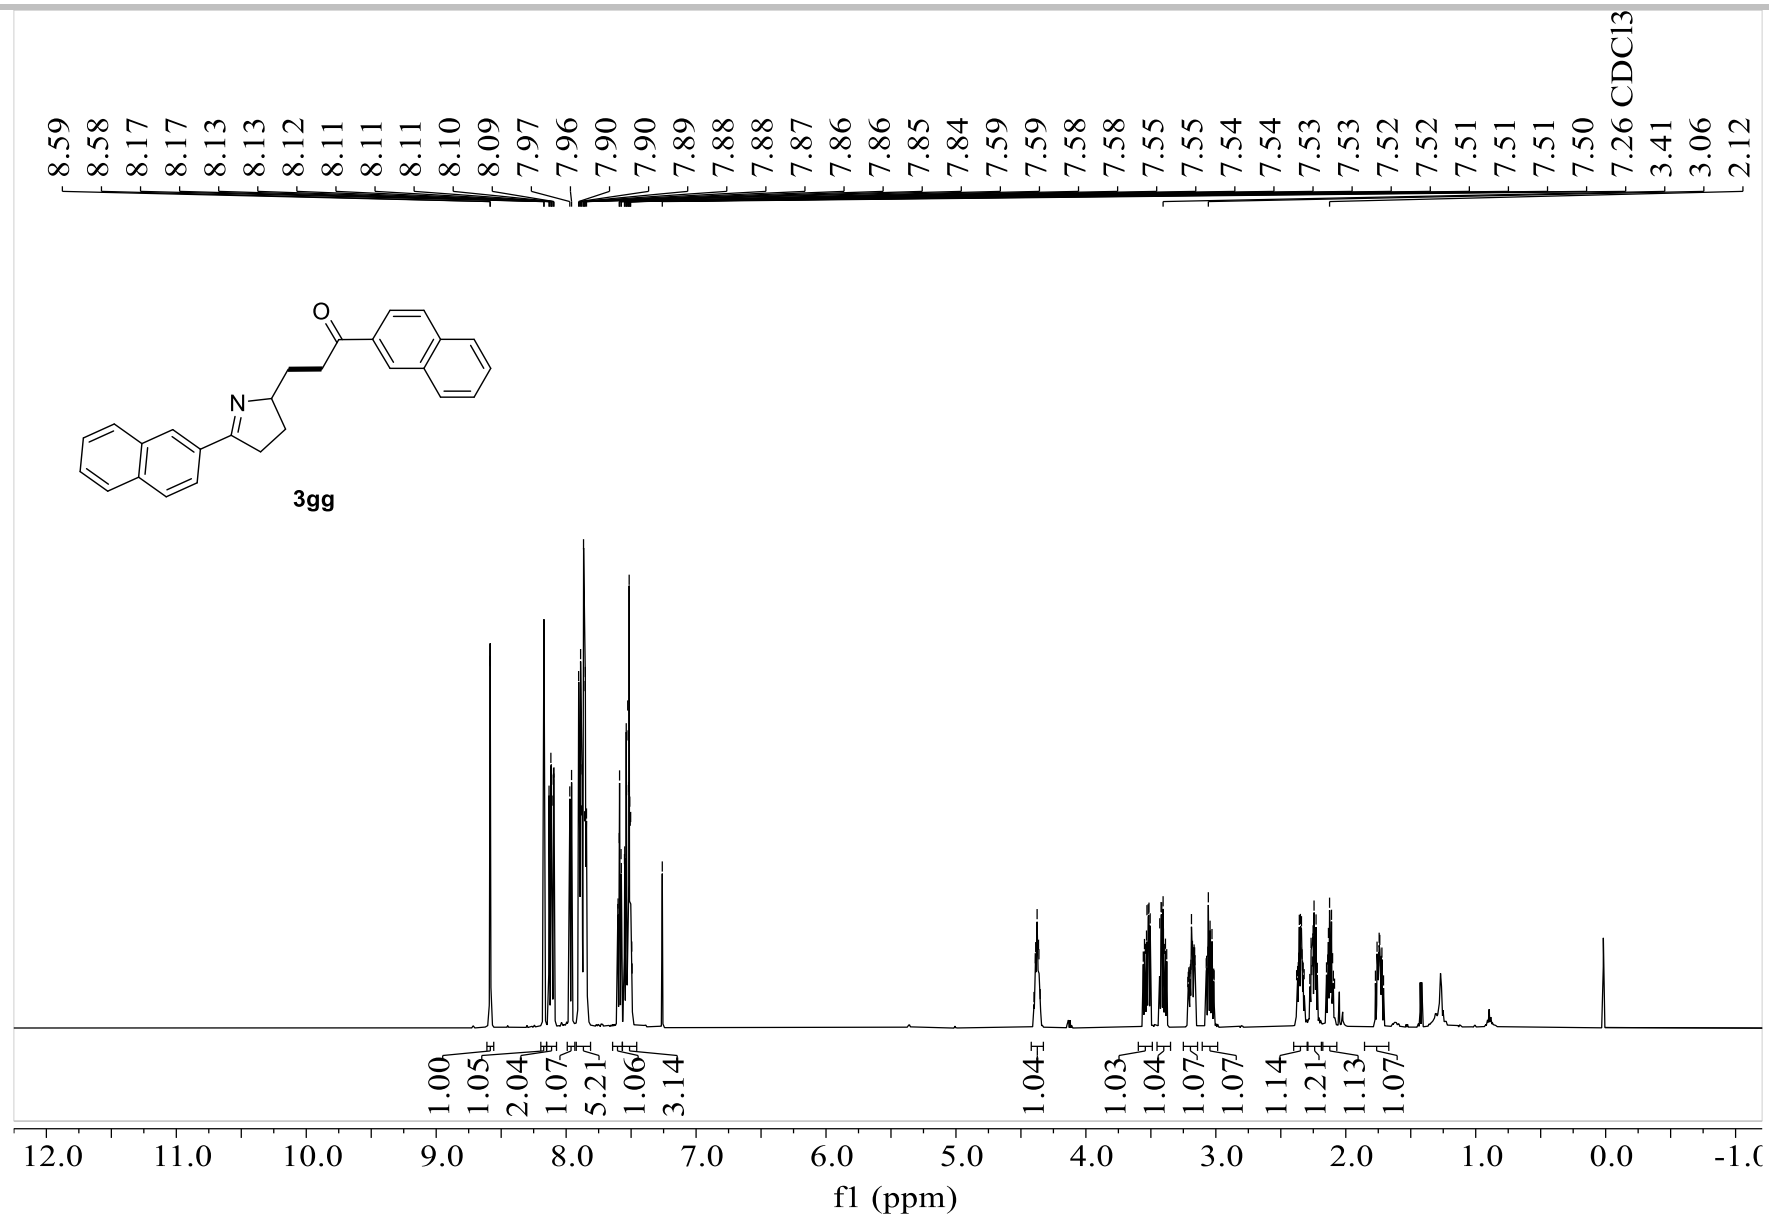

# SUPPORTING INFORMATION

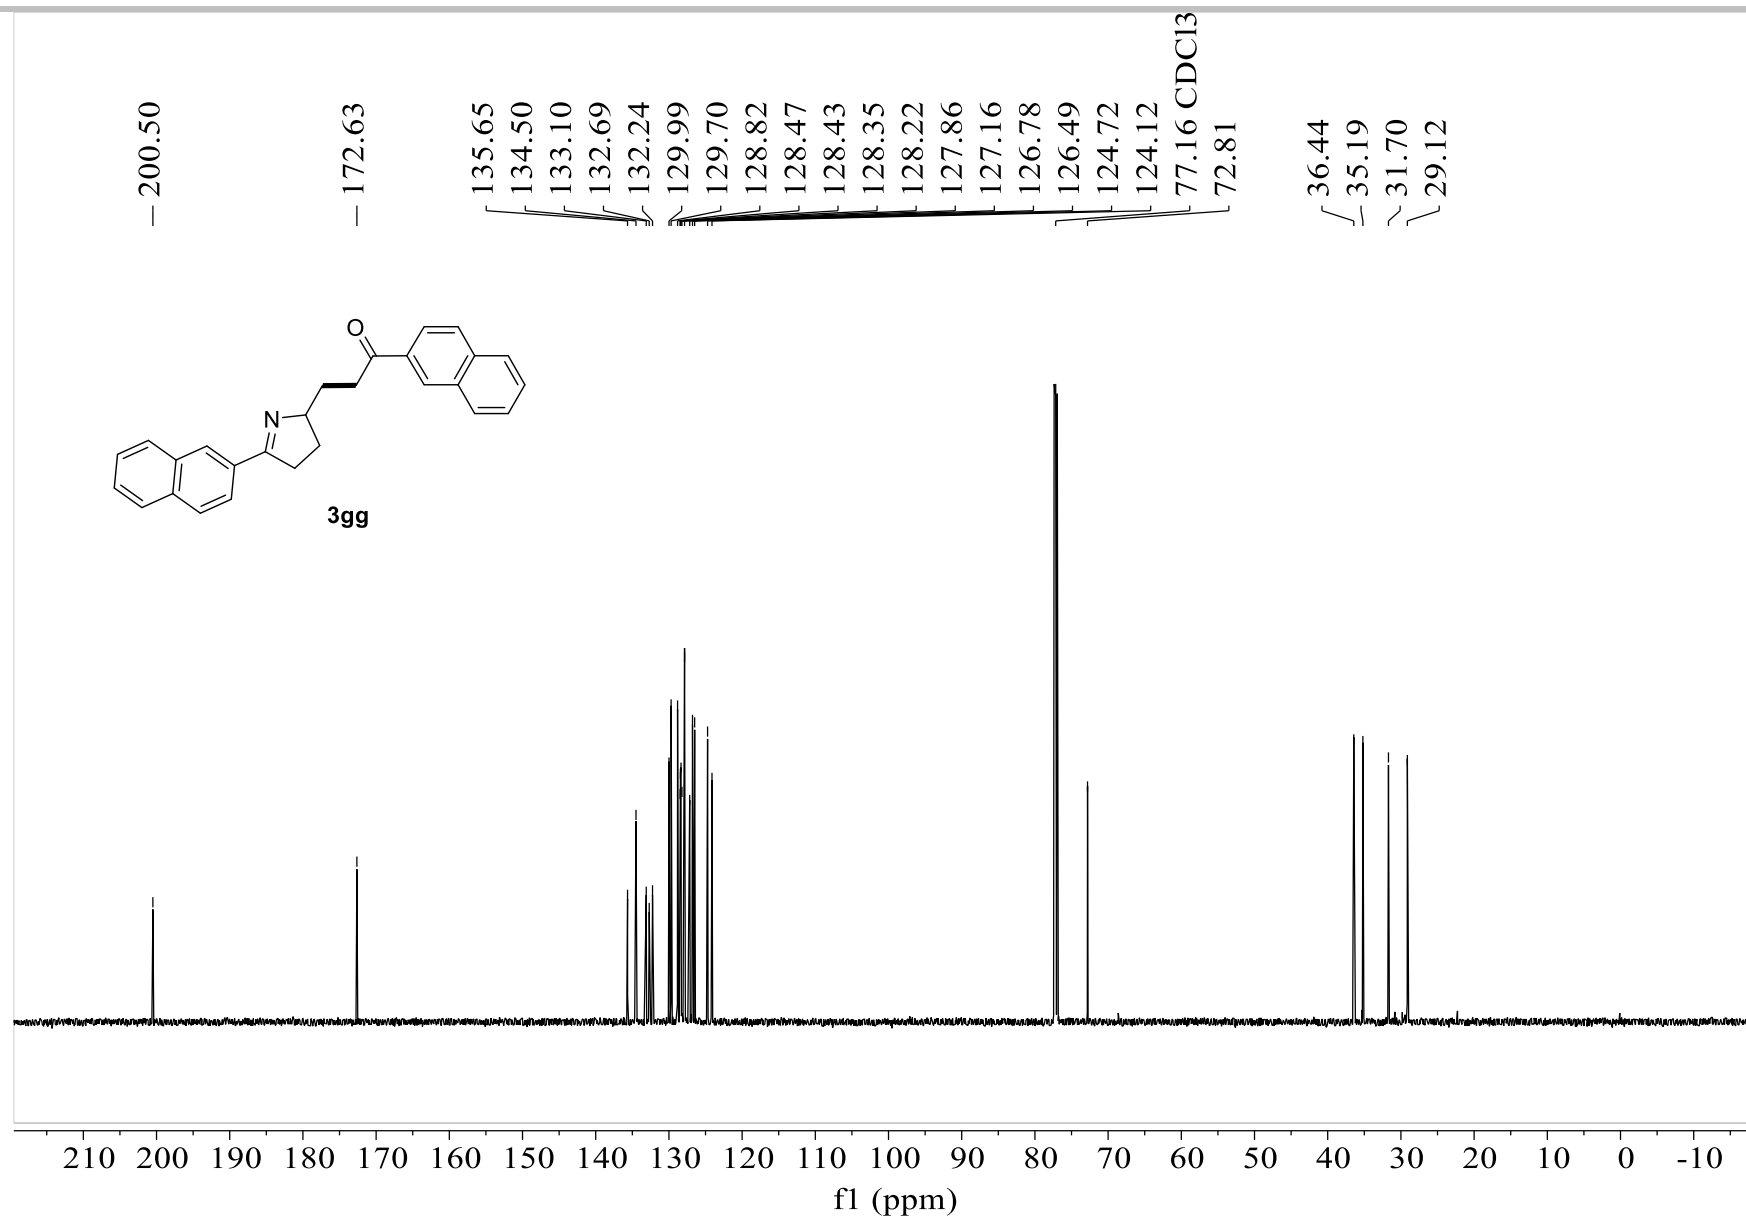

SUPPORTING INFORMATION

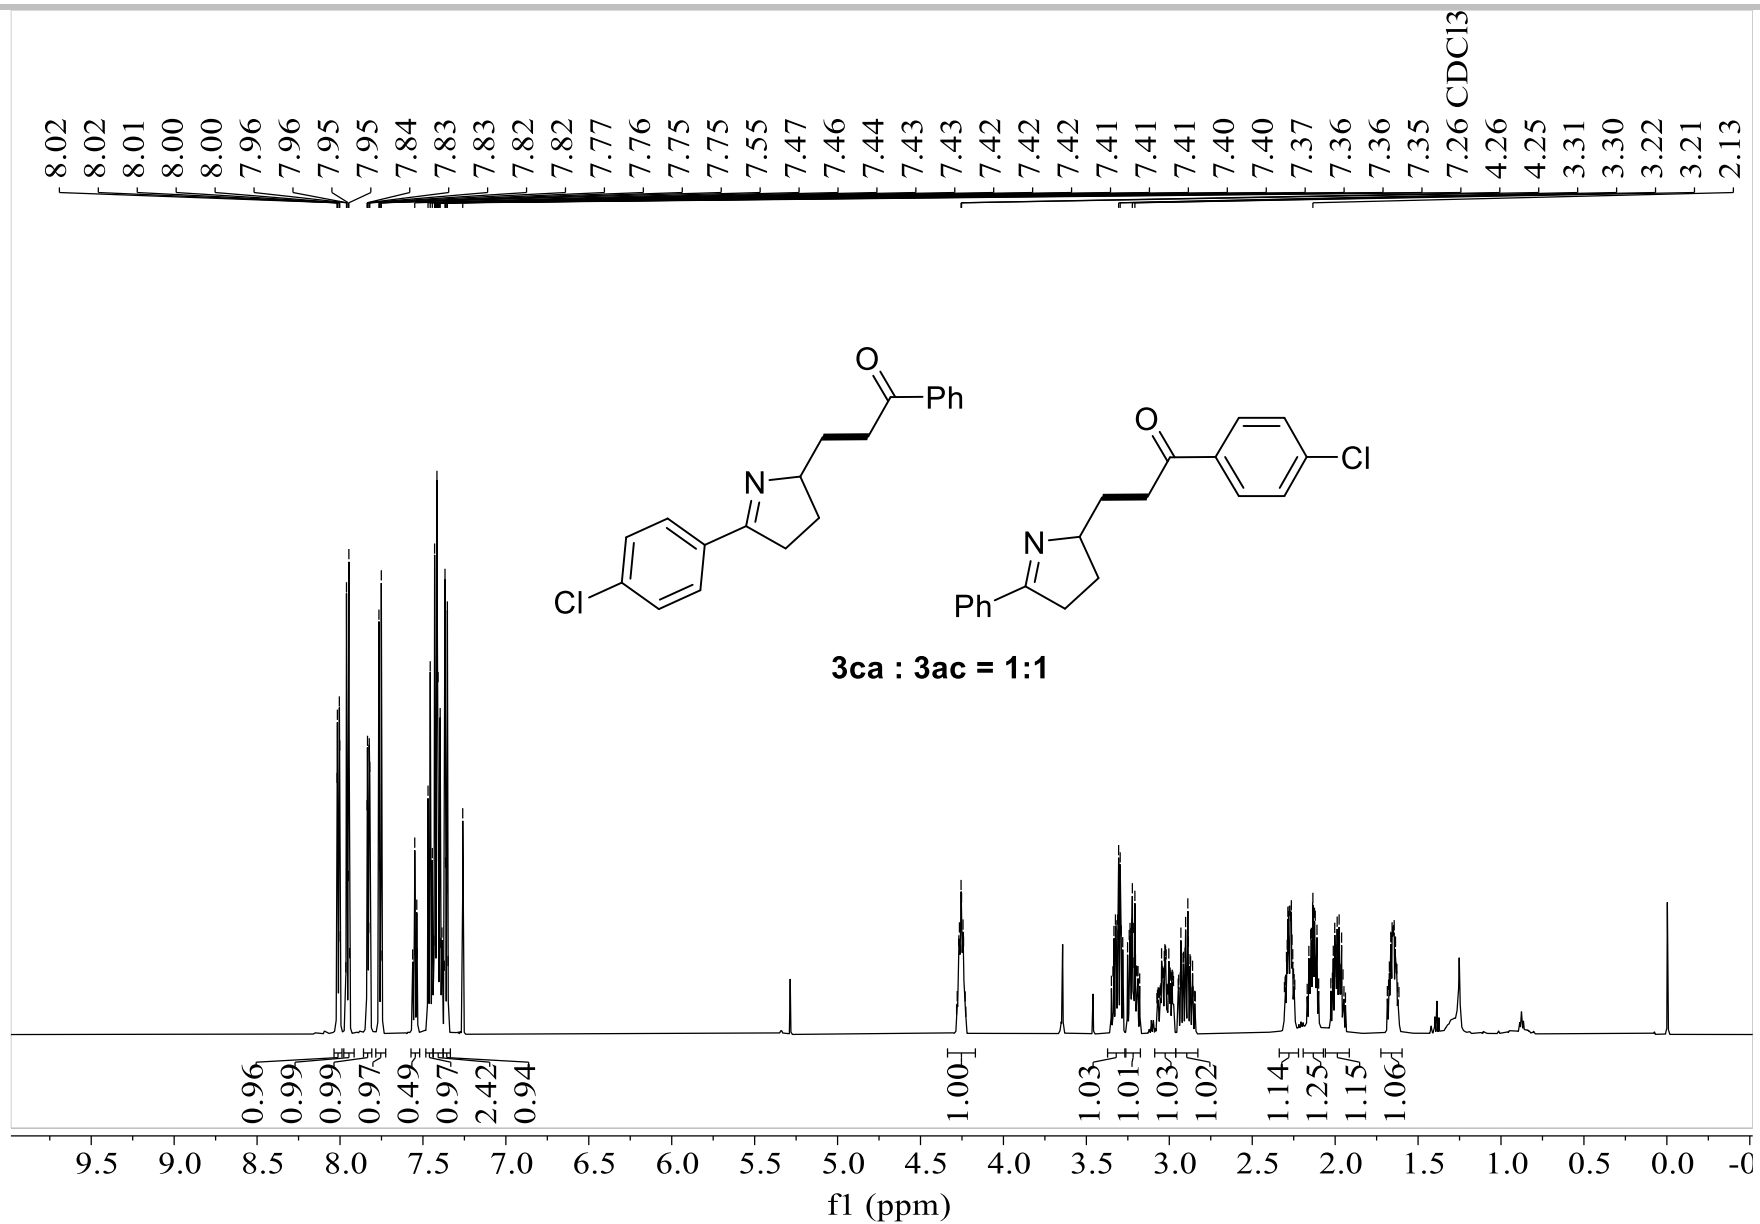



SUPPORTING INFORMATION

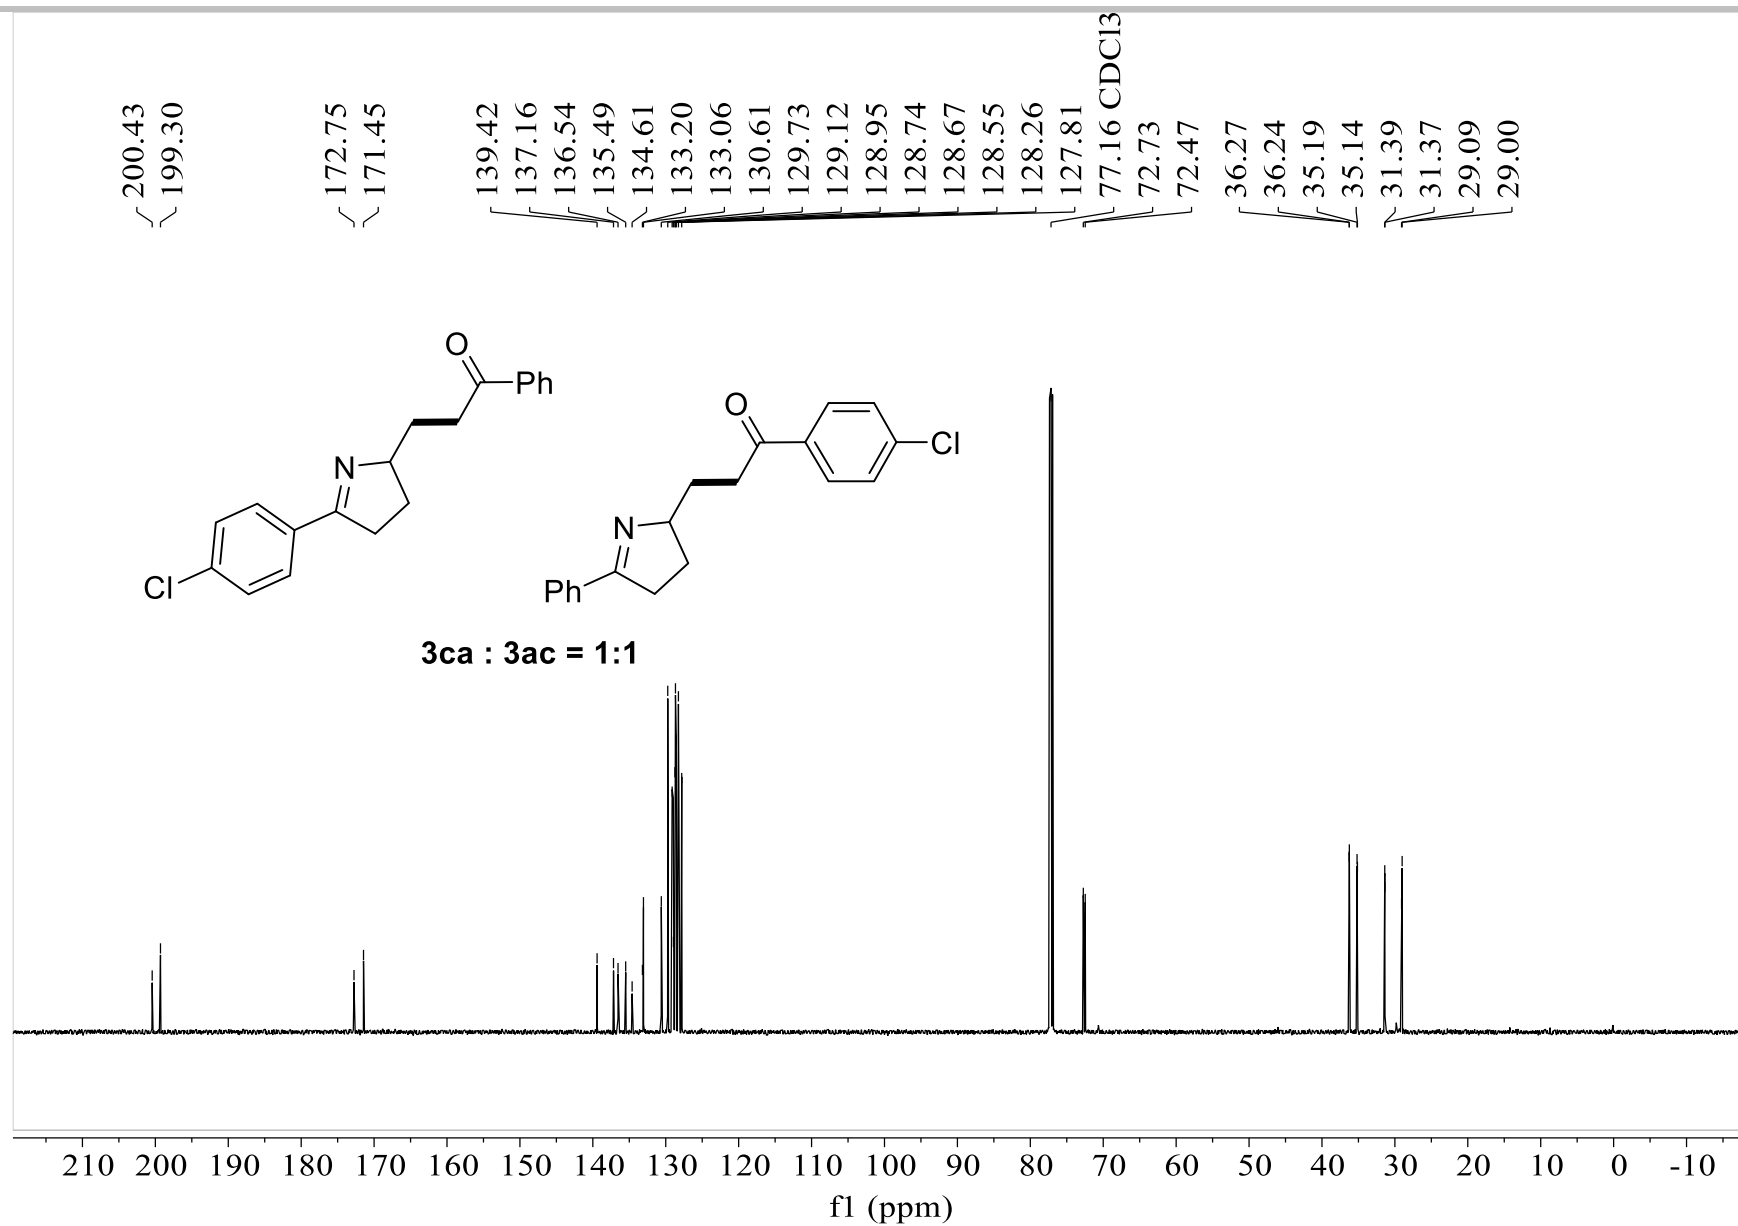

SUPPORTING INFORMATION

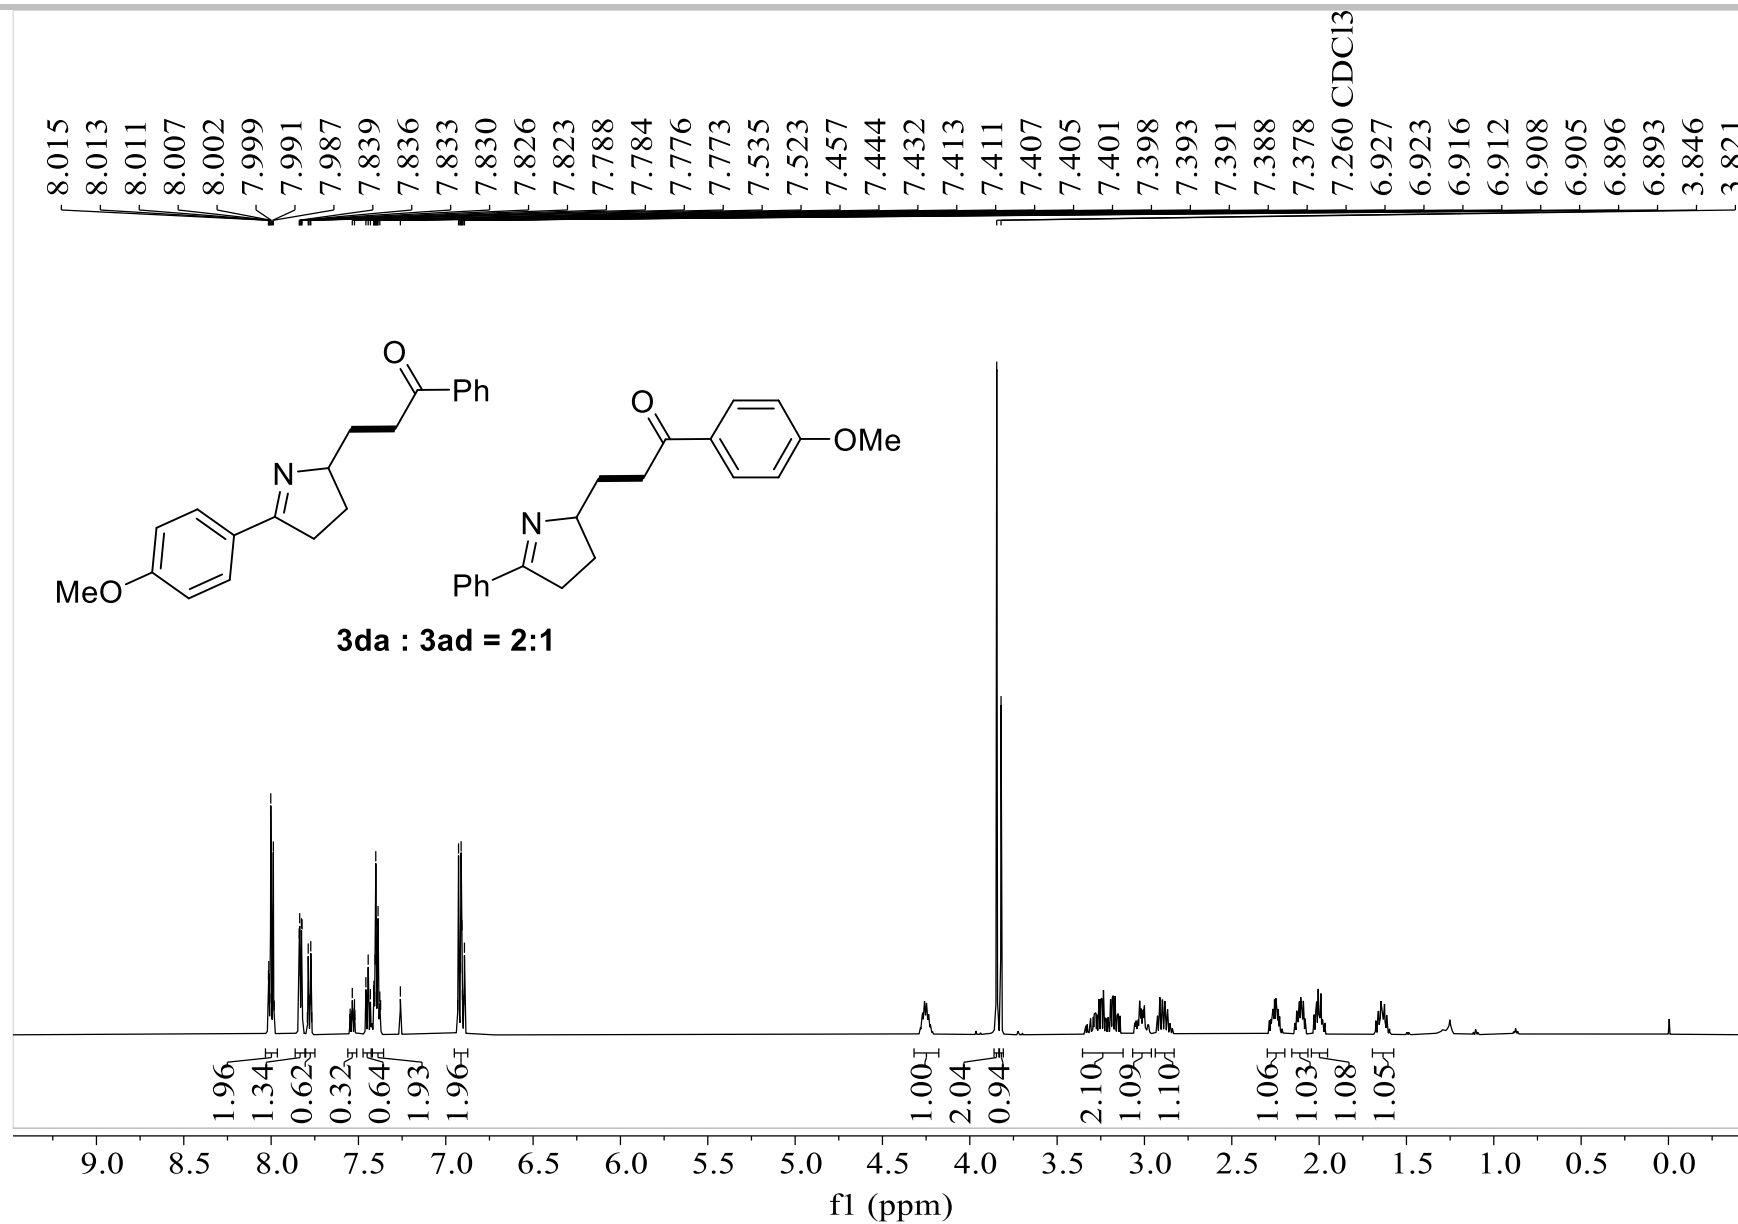

SUPPORTING INFORMATION

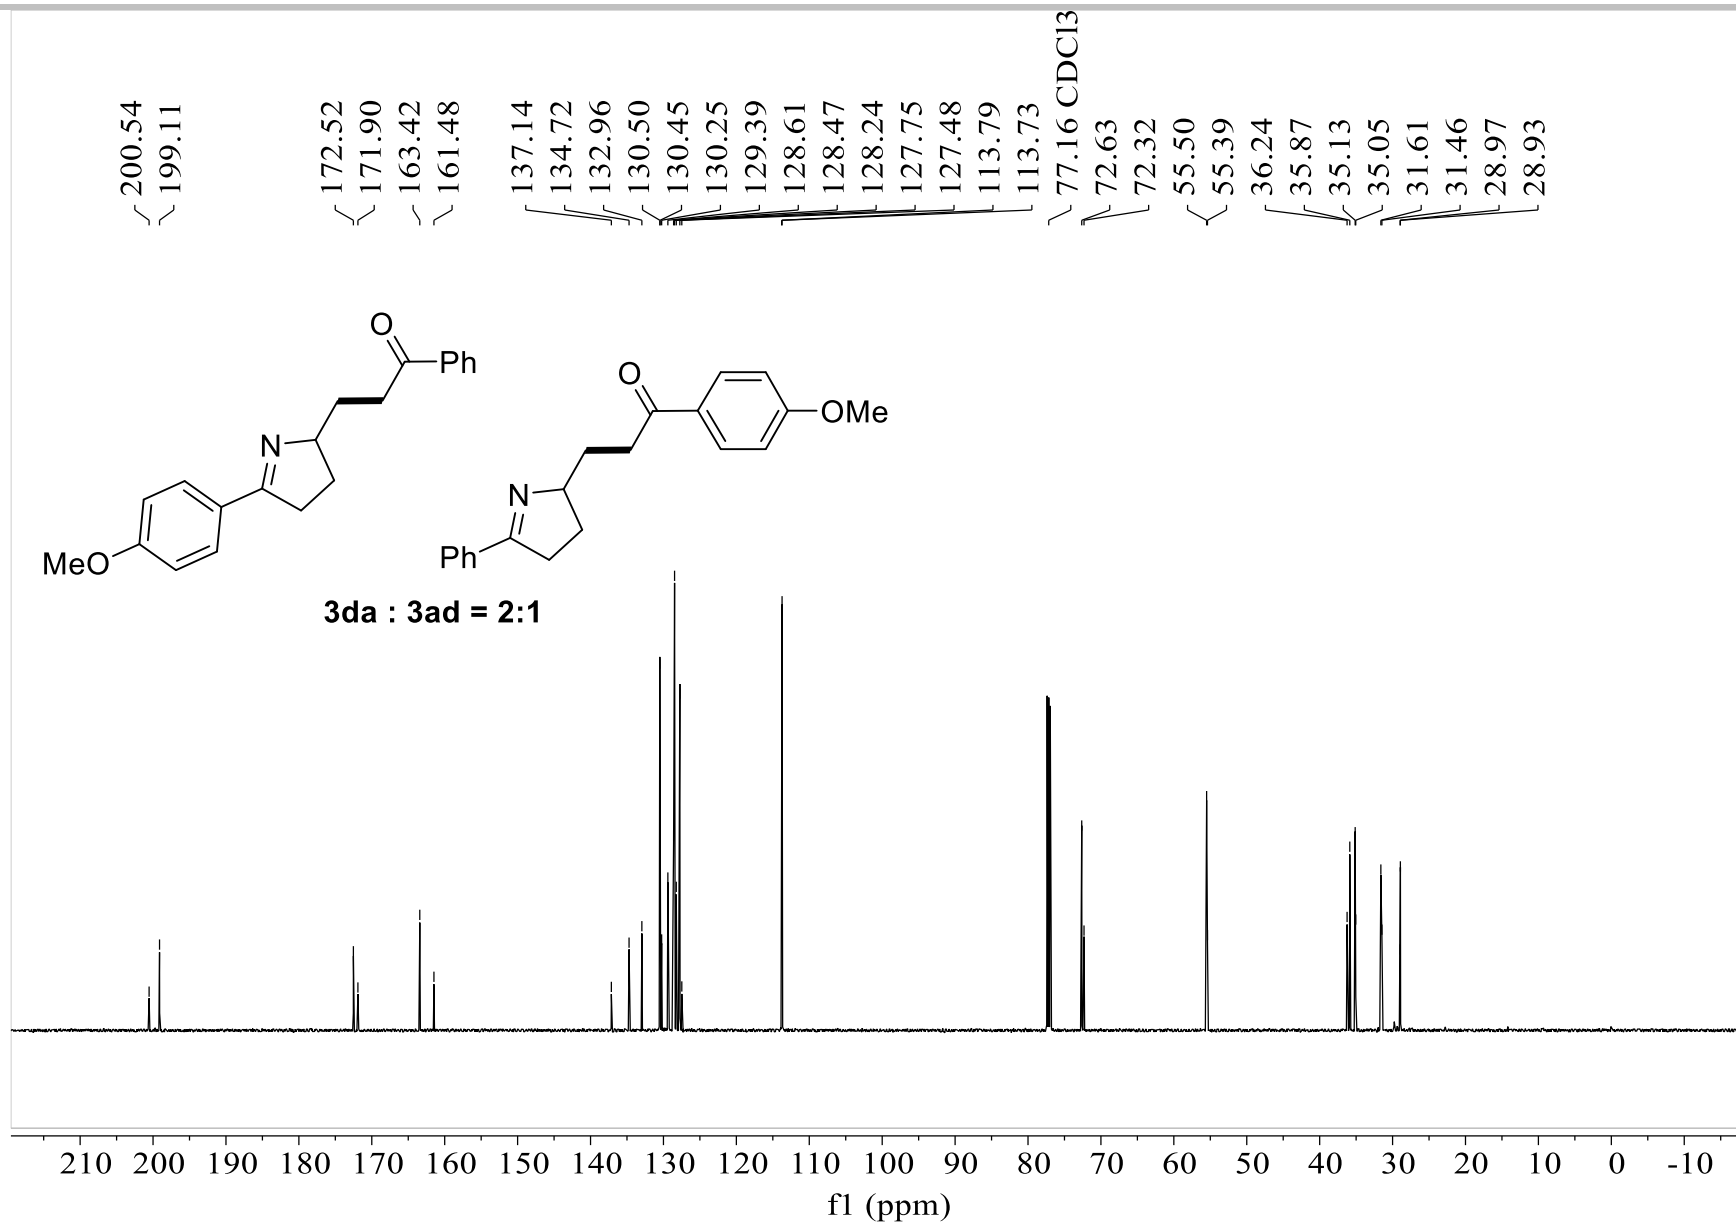

SUPPORTING INFORMATION

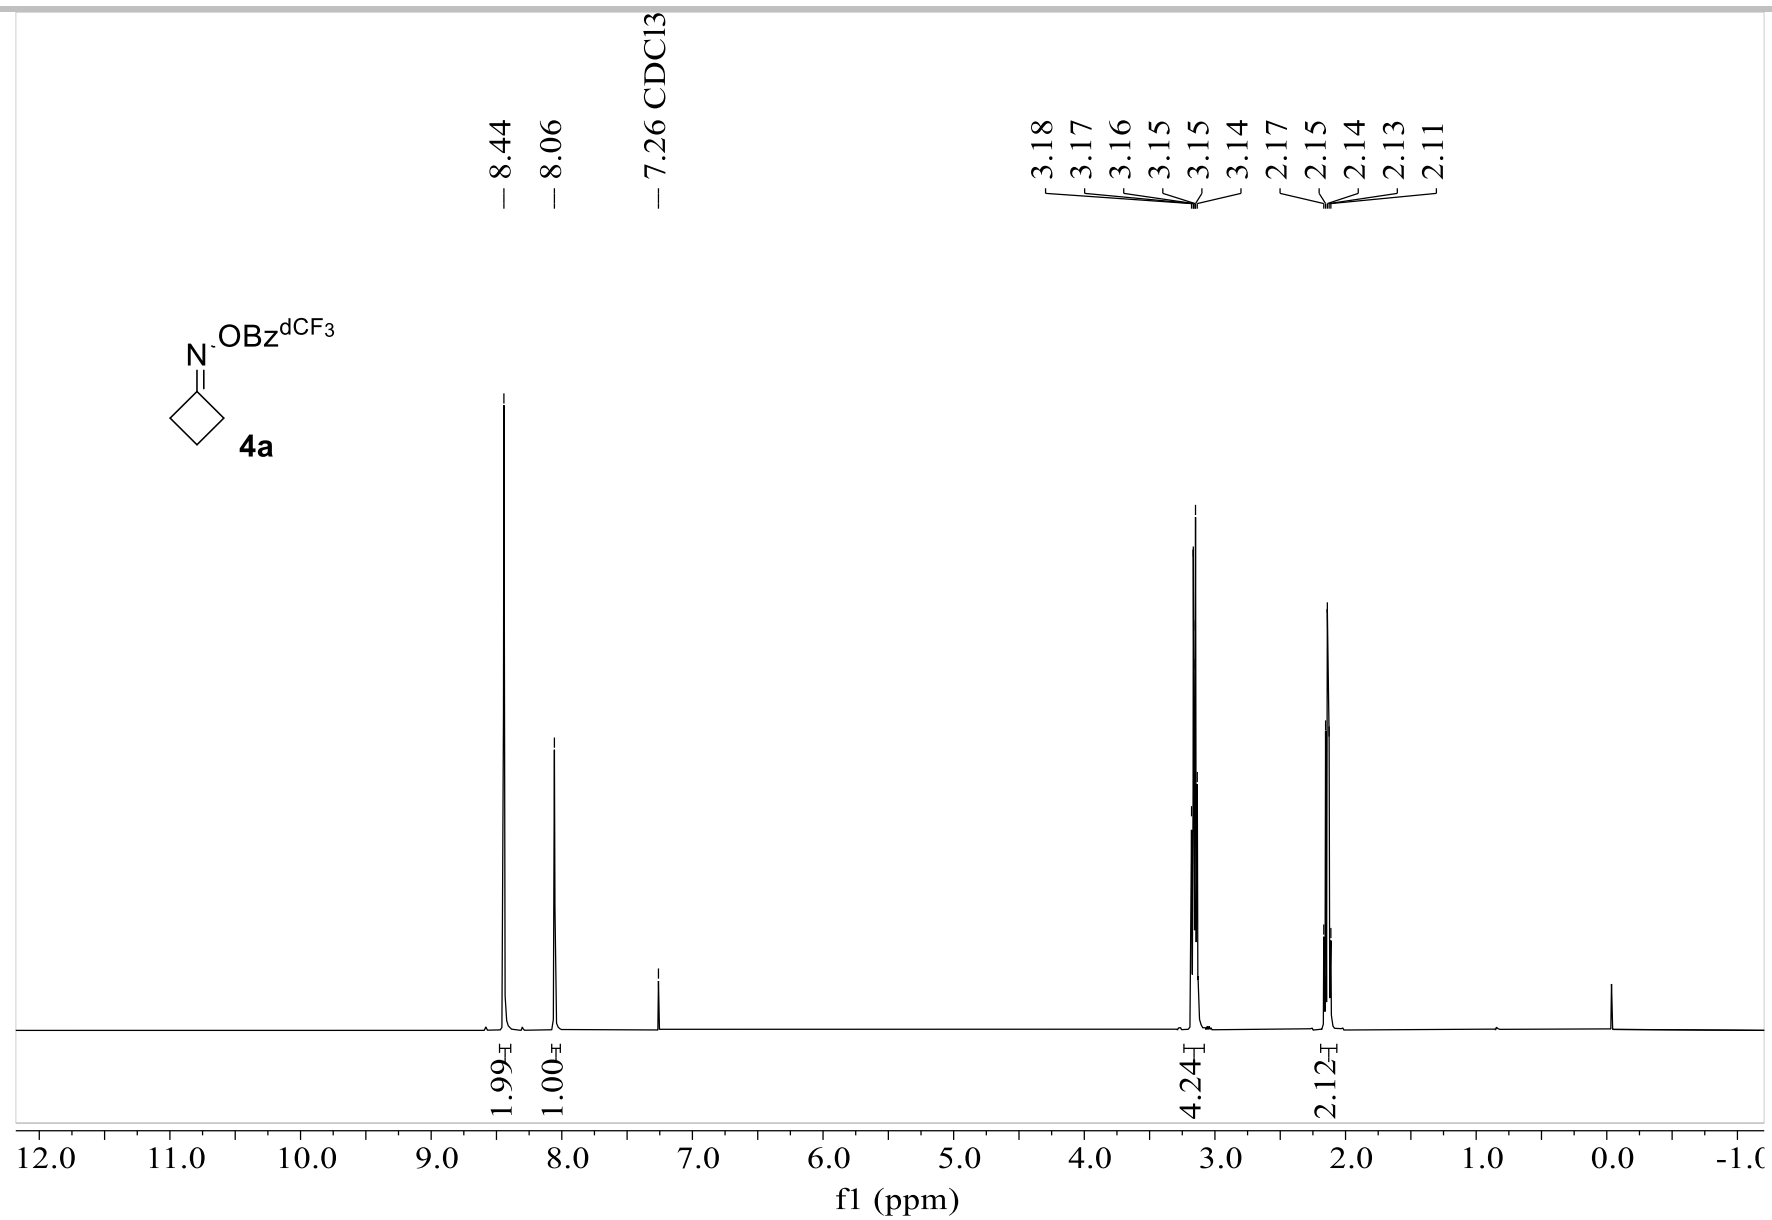

# SUPPORTING INFORMATION

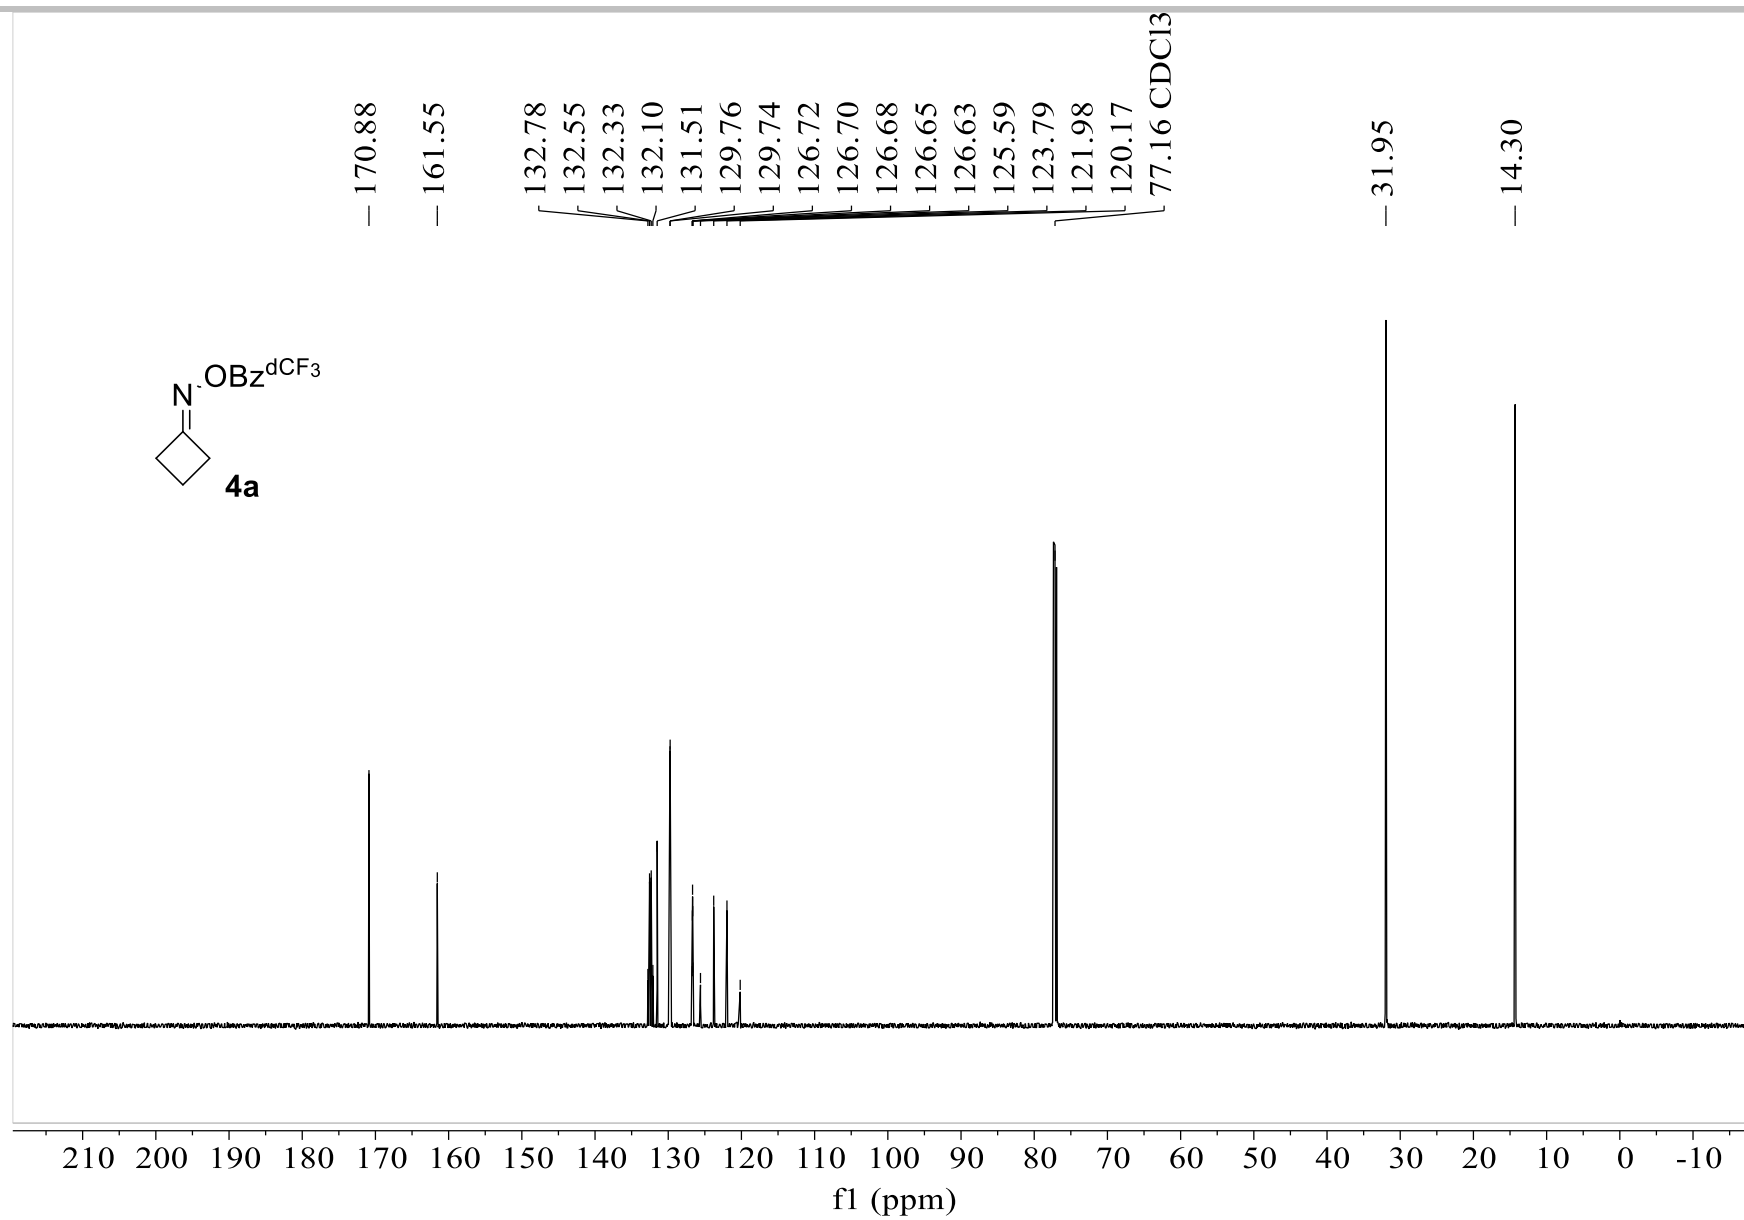

SUPPORTING INFORMATION

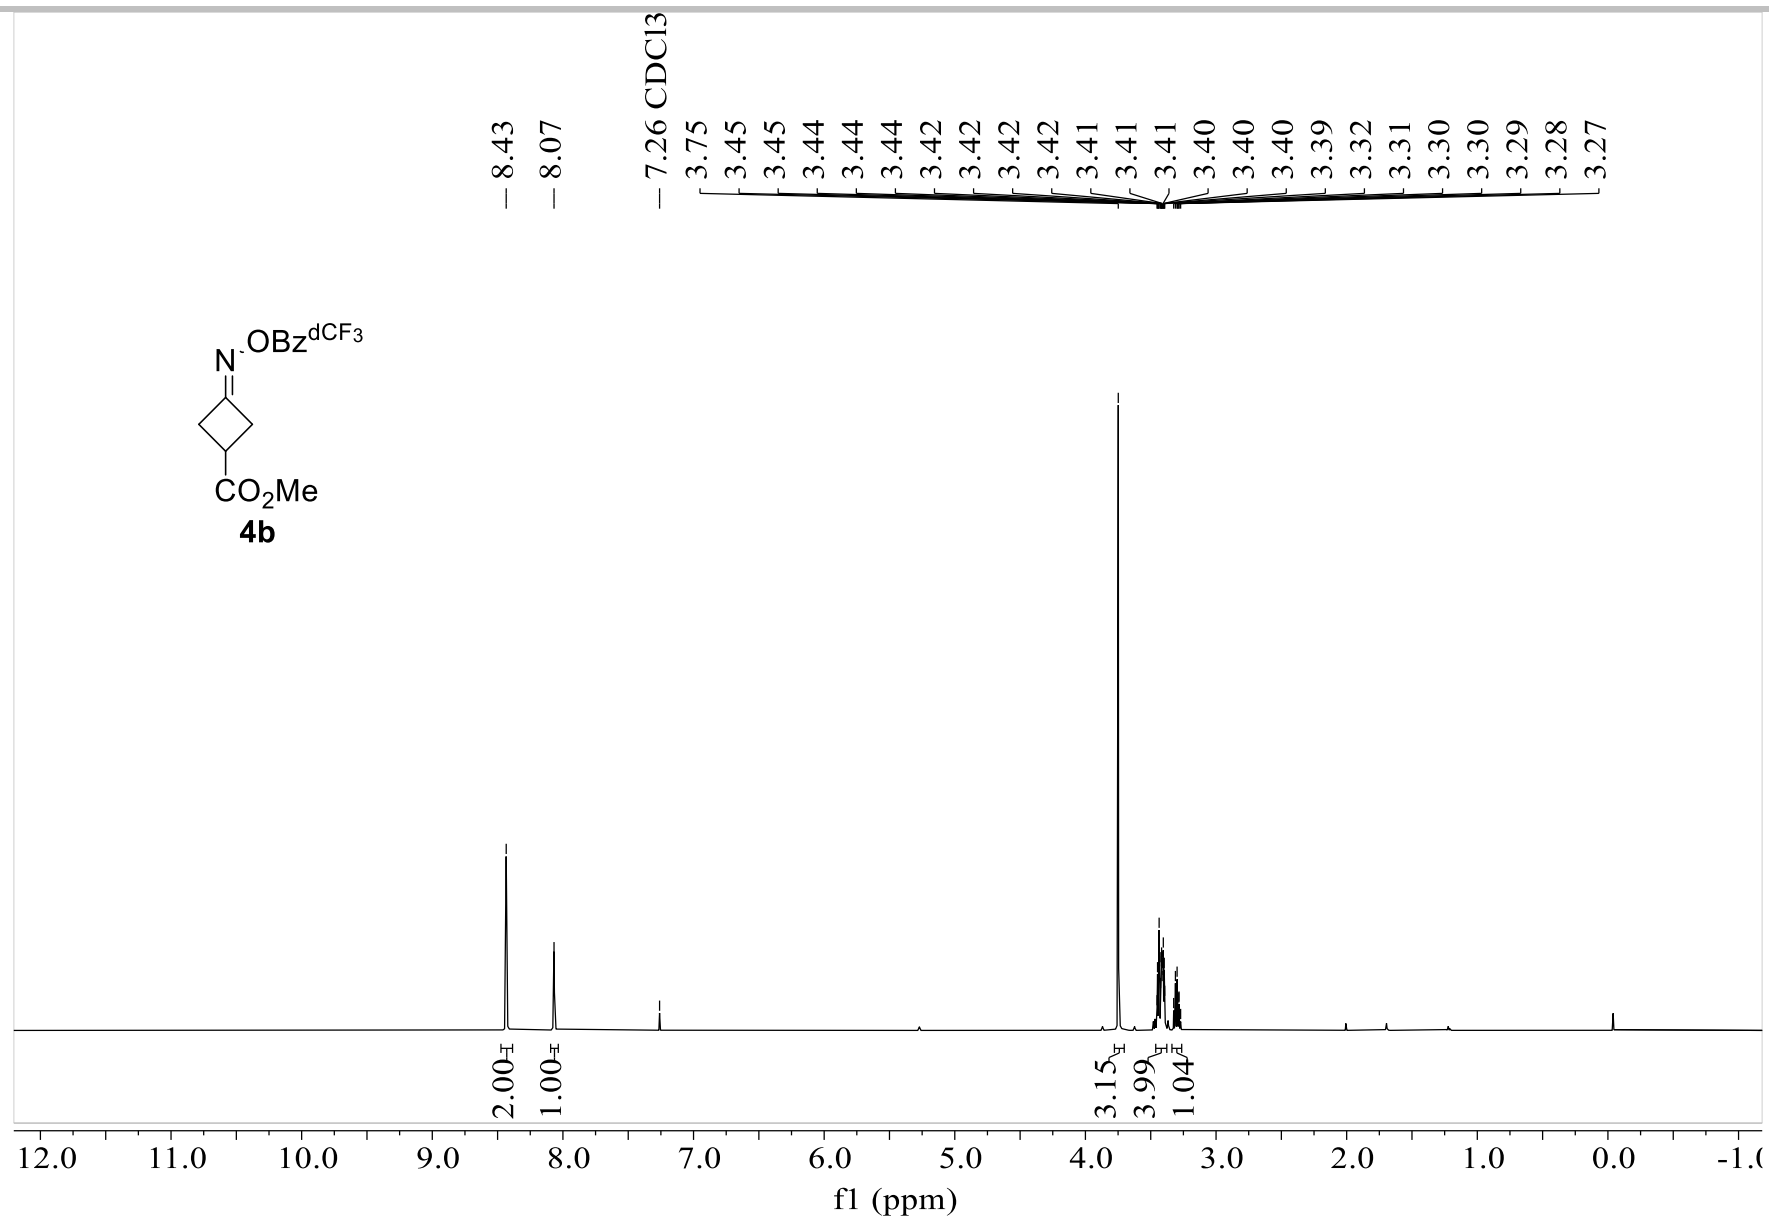

SUPPORTING INFORMATION

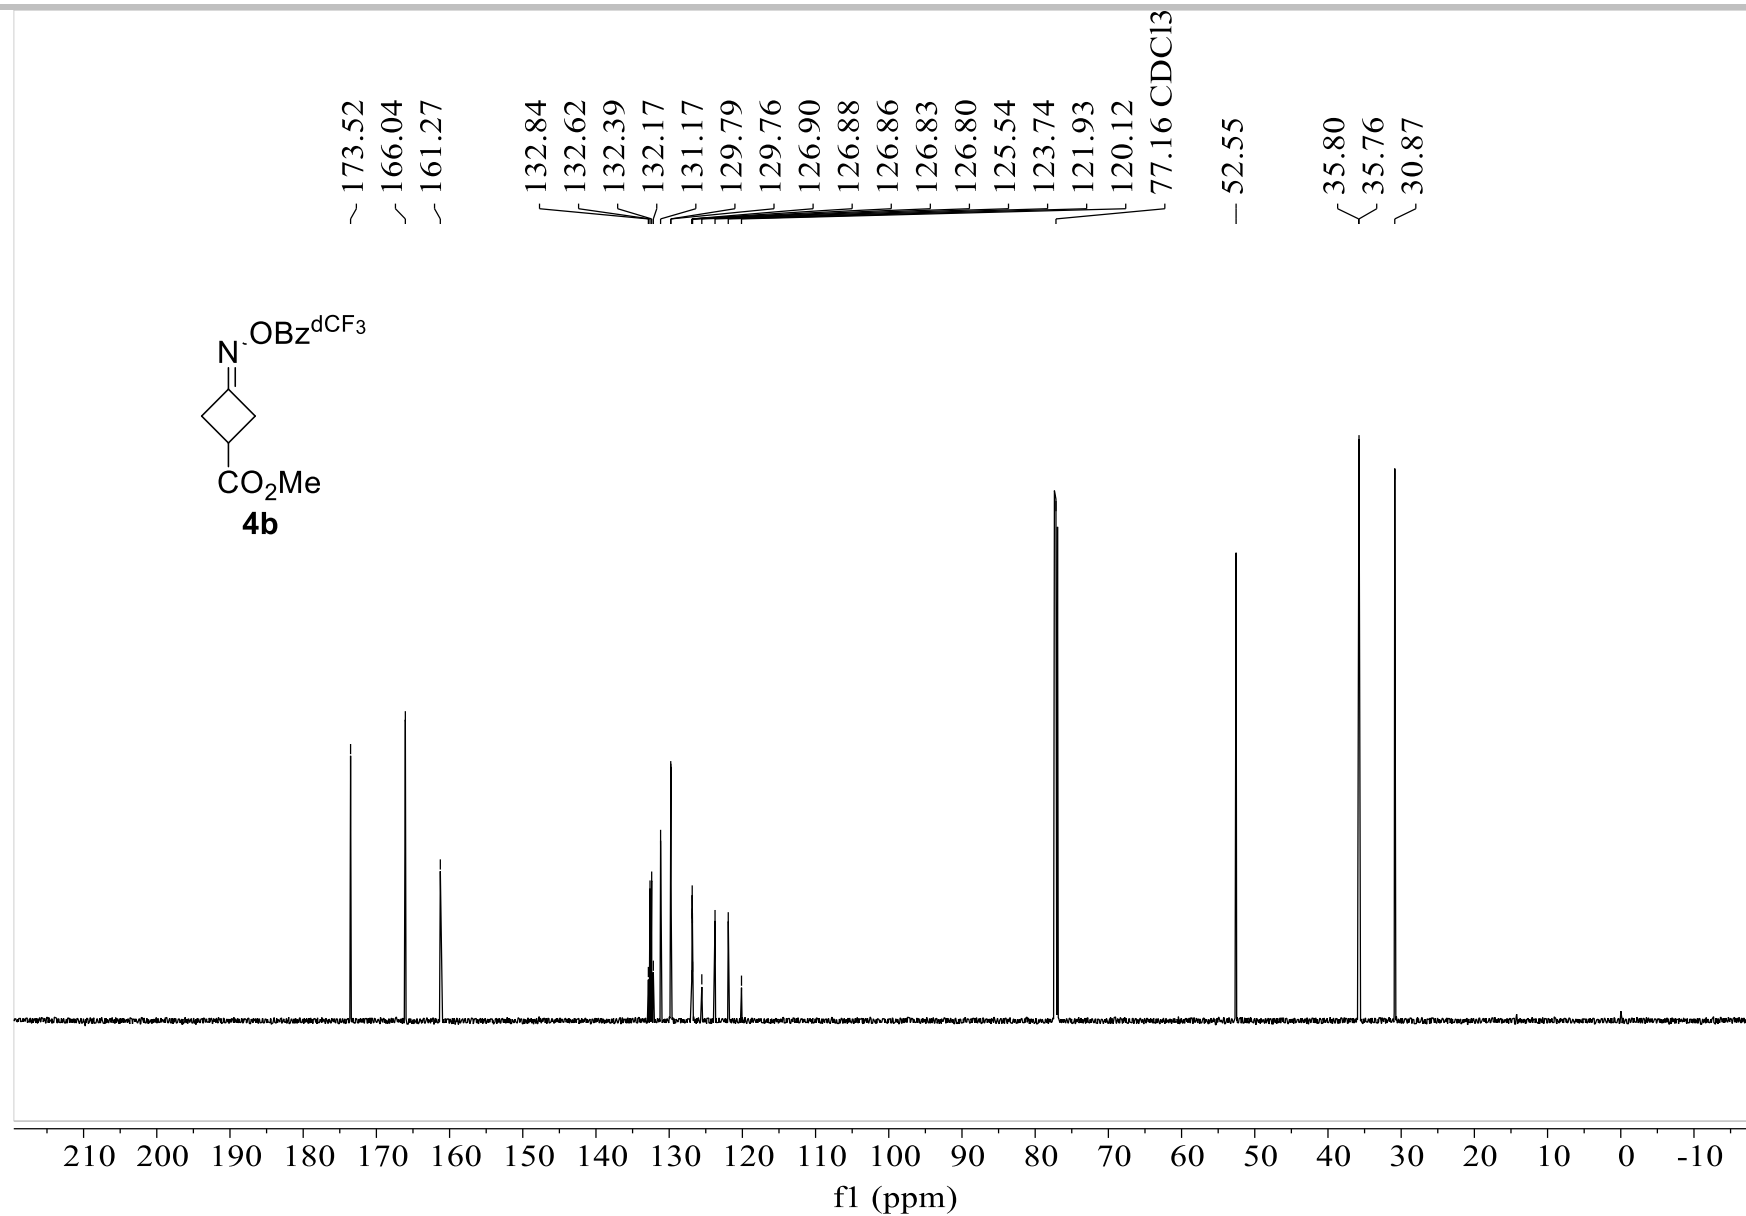

SUPPORTING INFORMATION

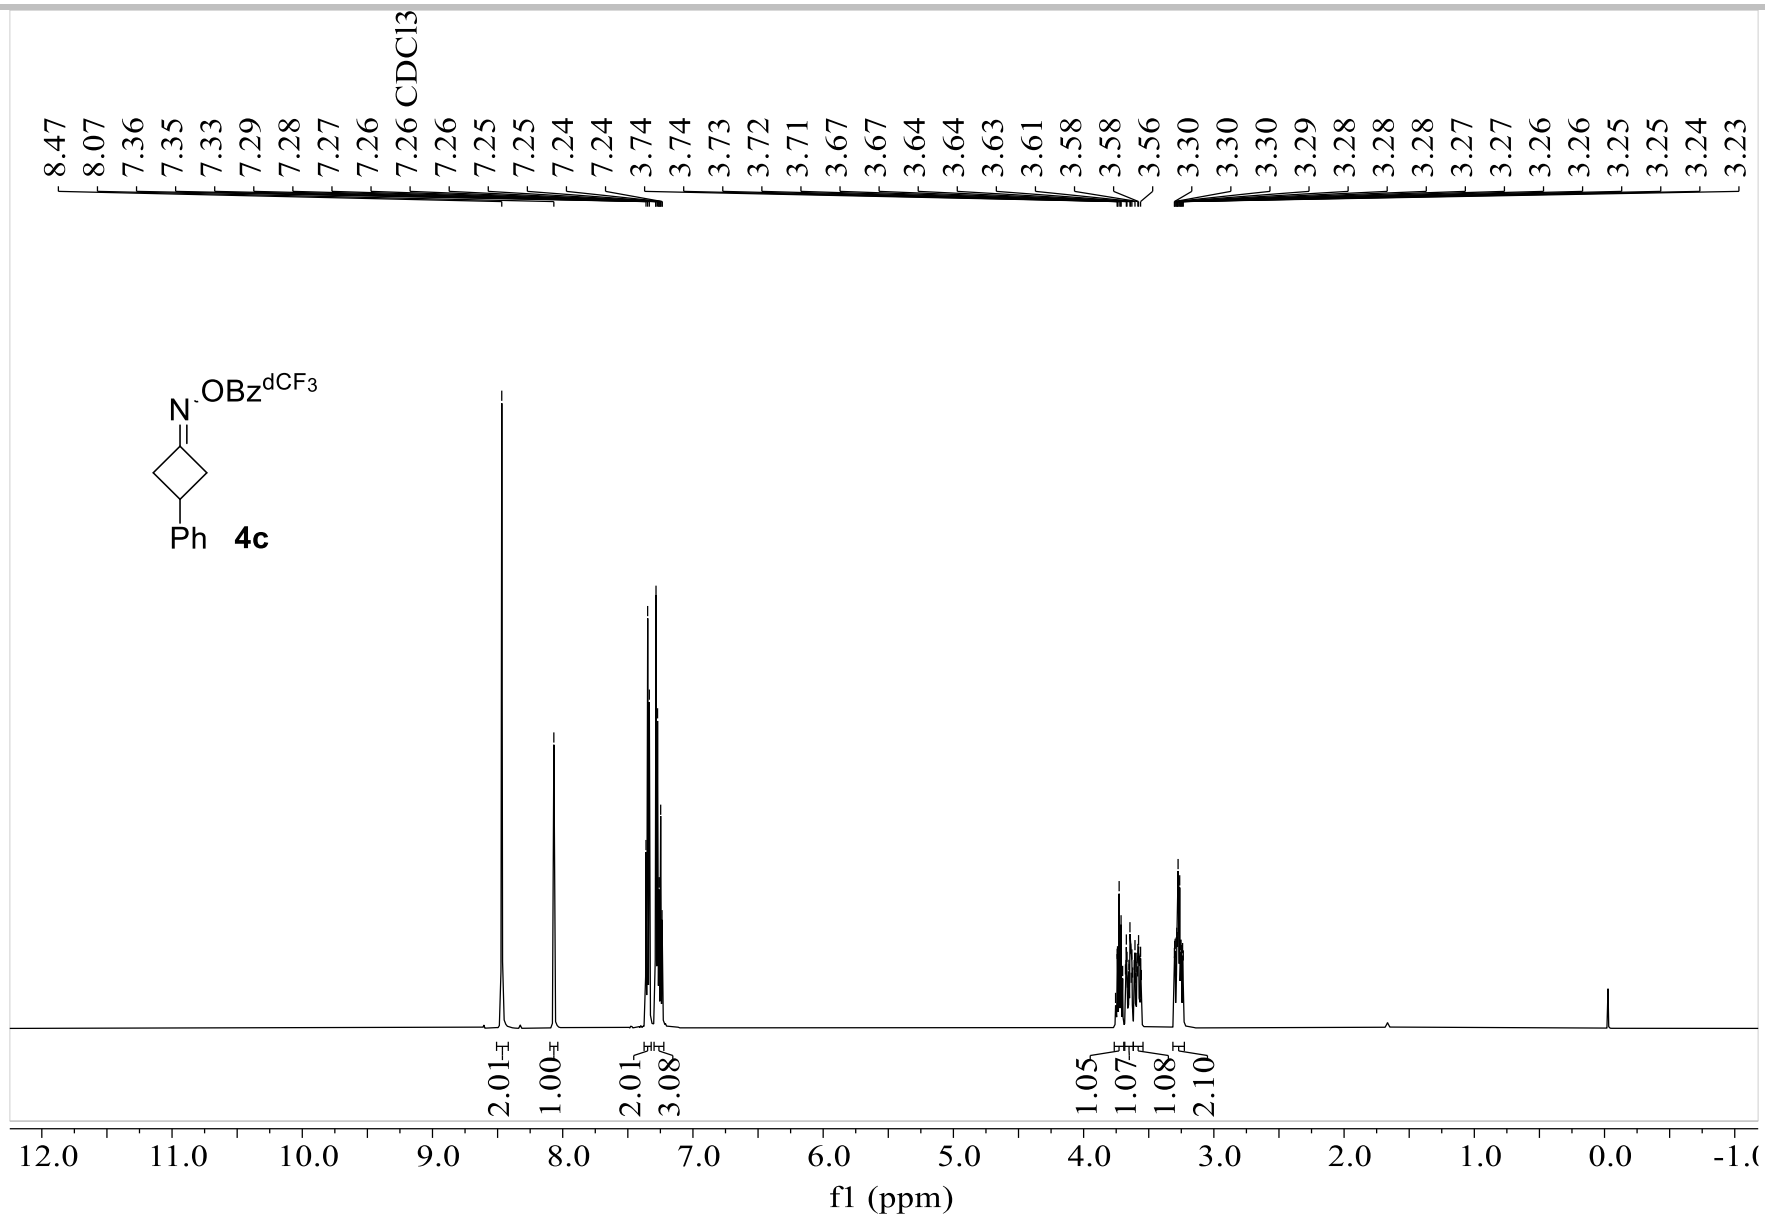



SUPPORTING INFORMATION

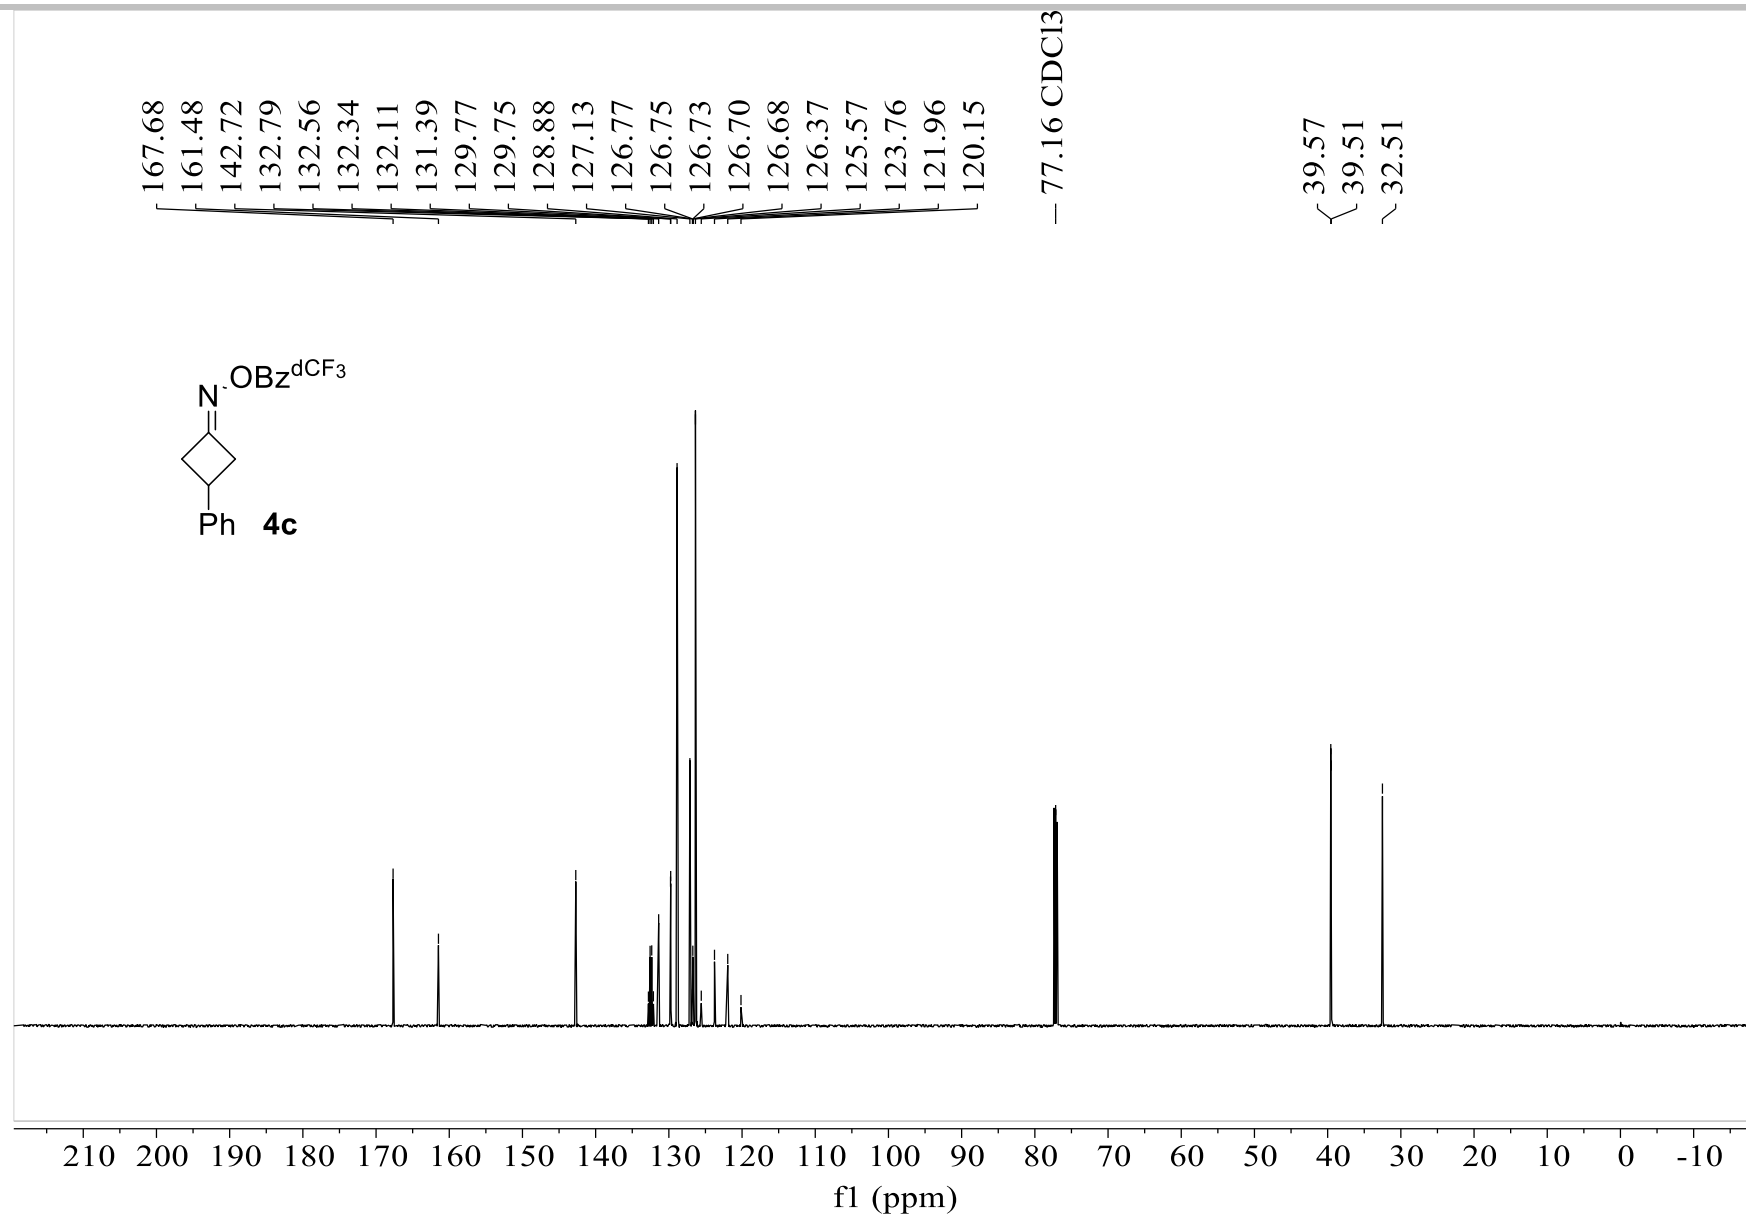

SUPPORTING INFORMATION

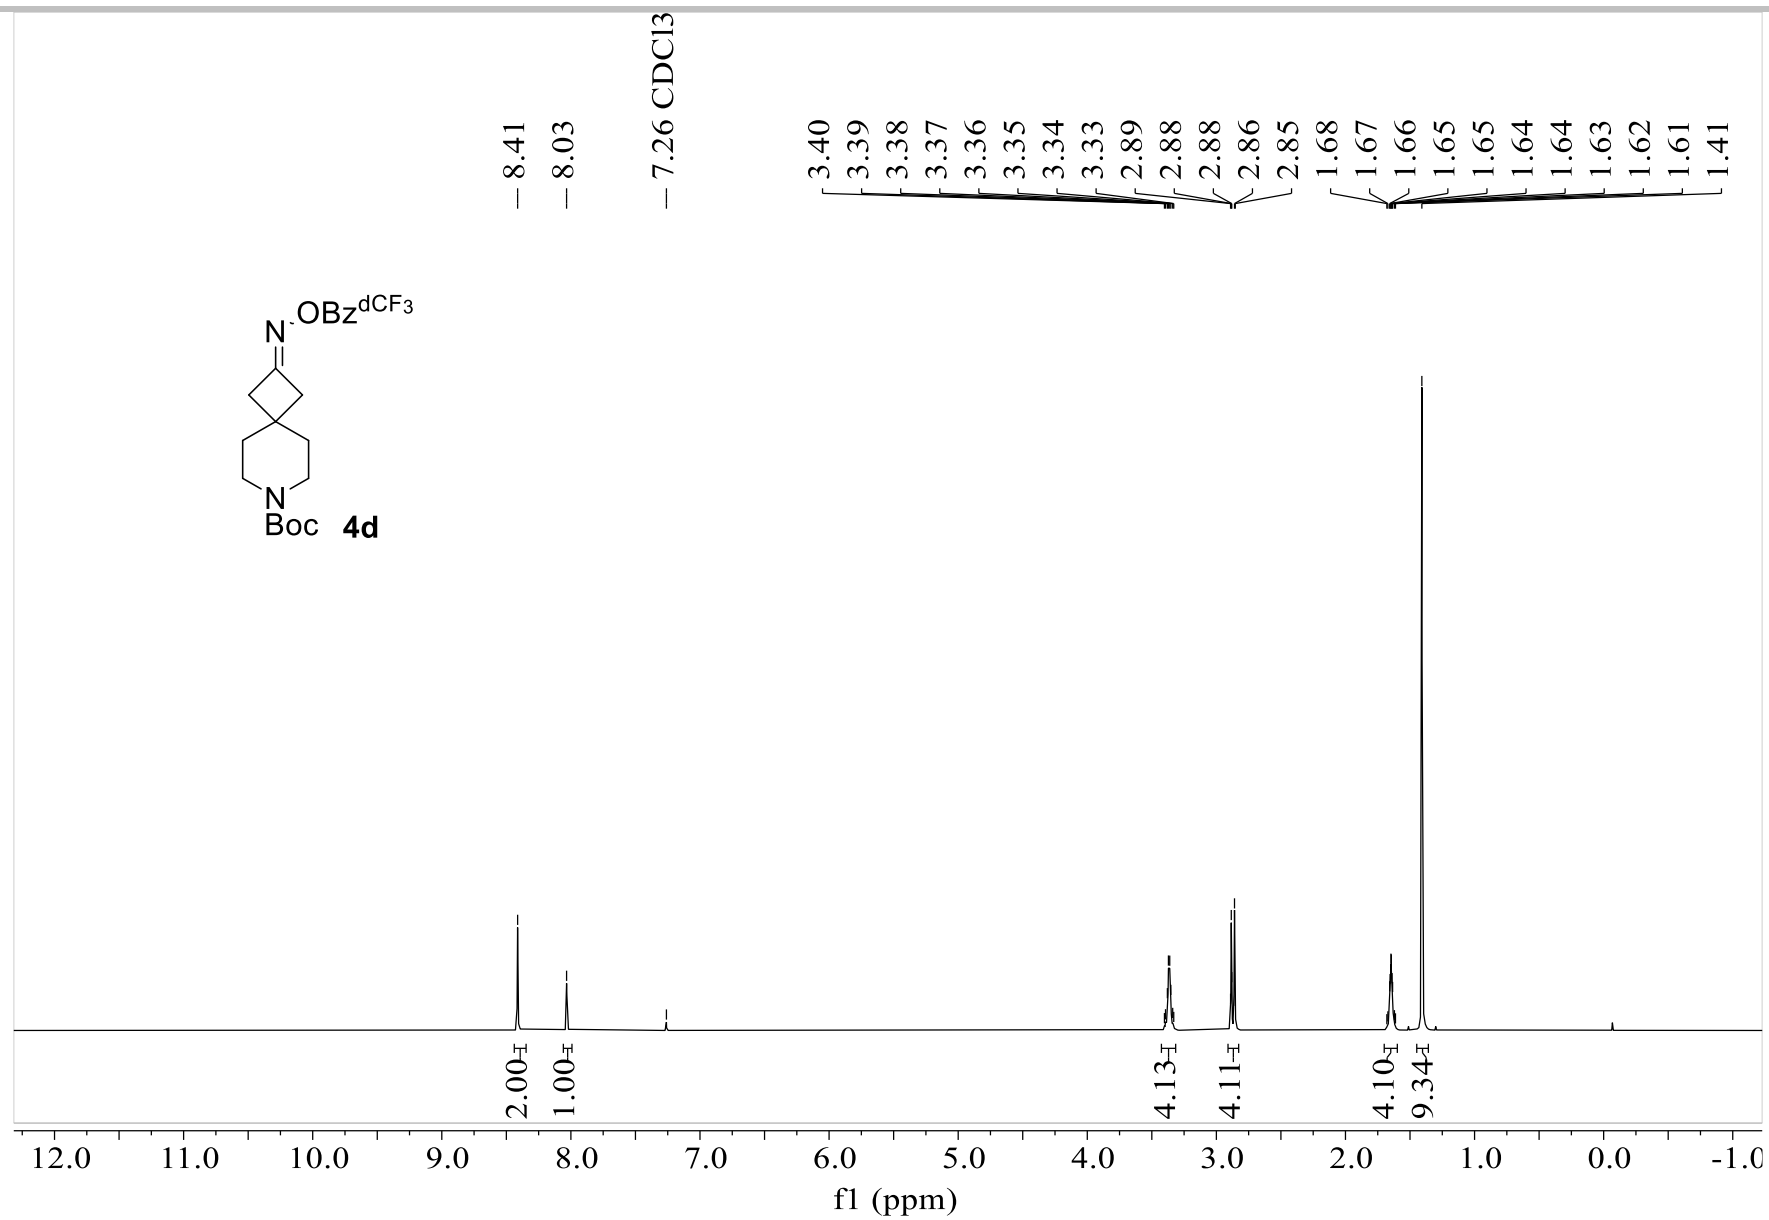

# SUPPORTING INFORMATION

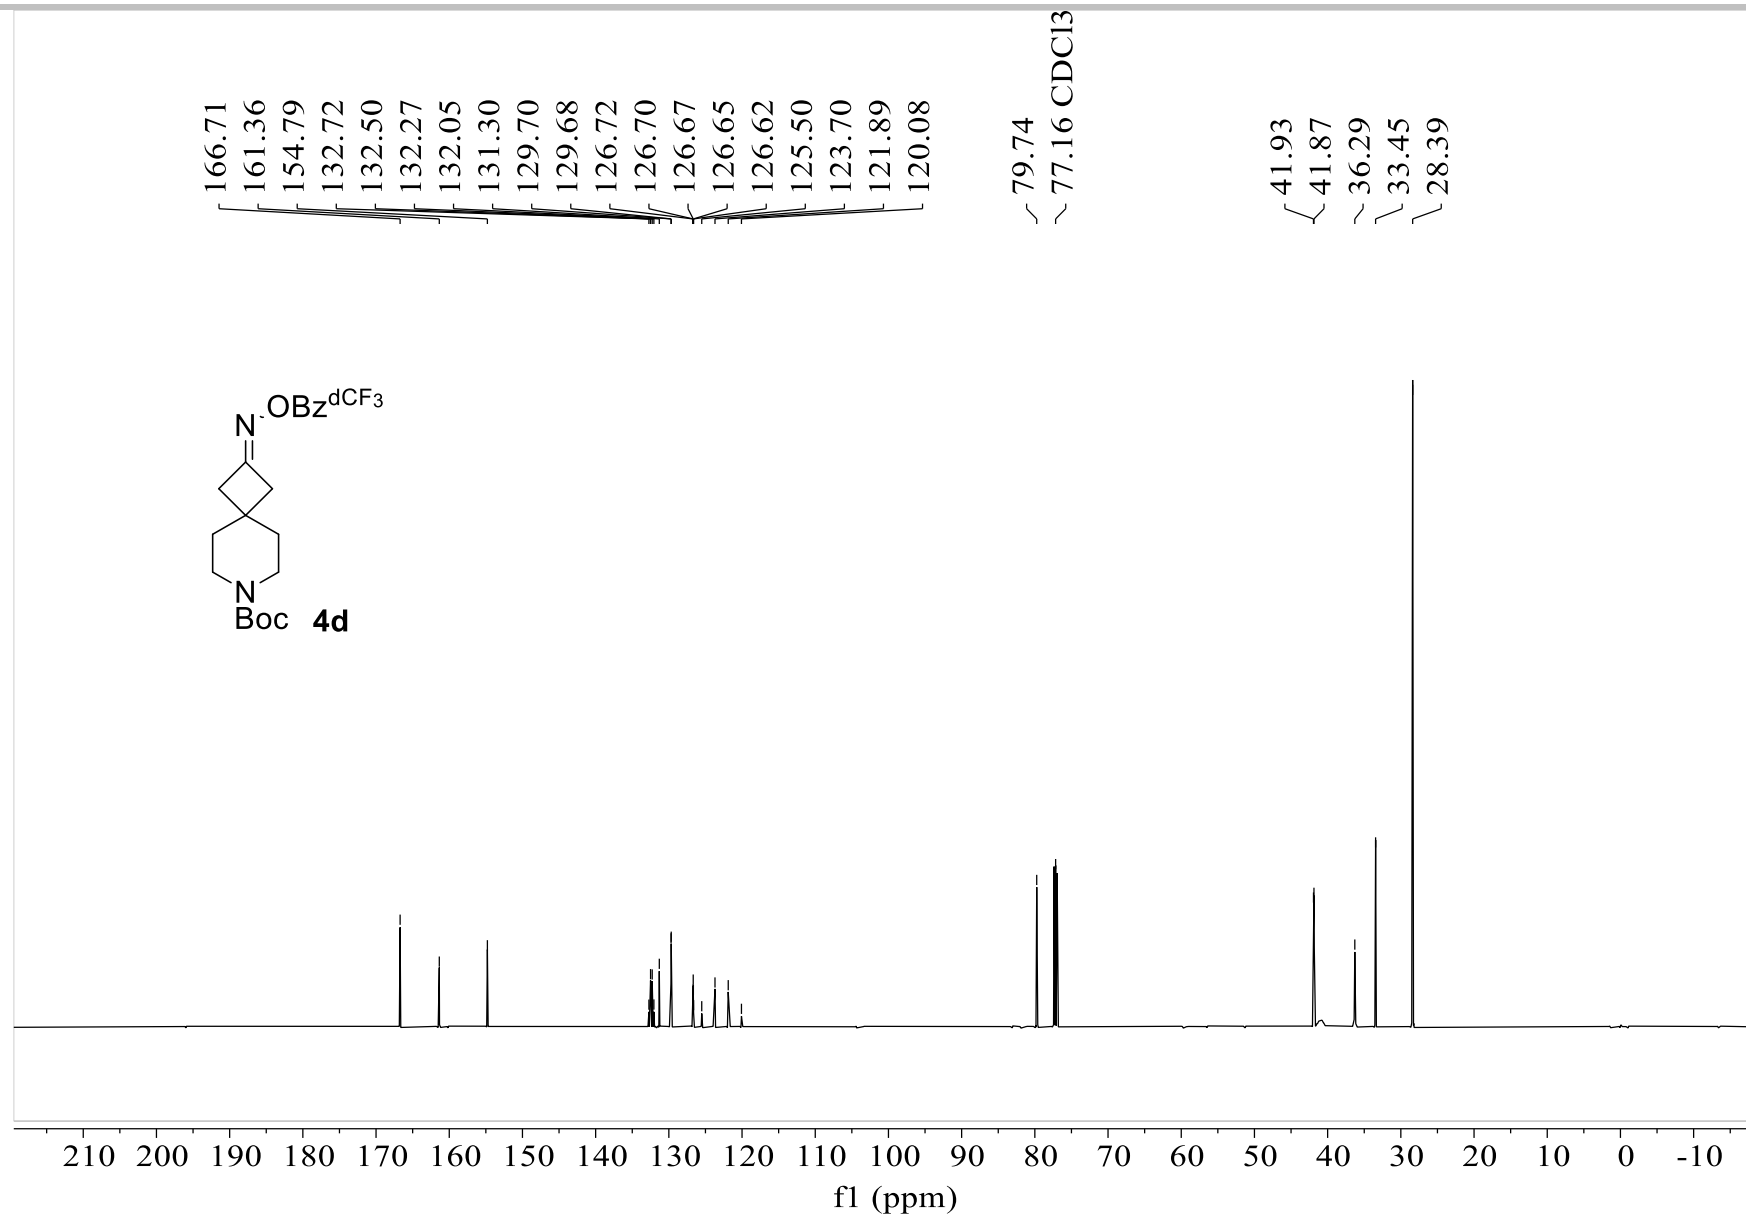

SUPPORTING INFORMATION

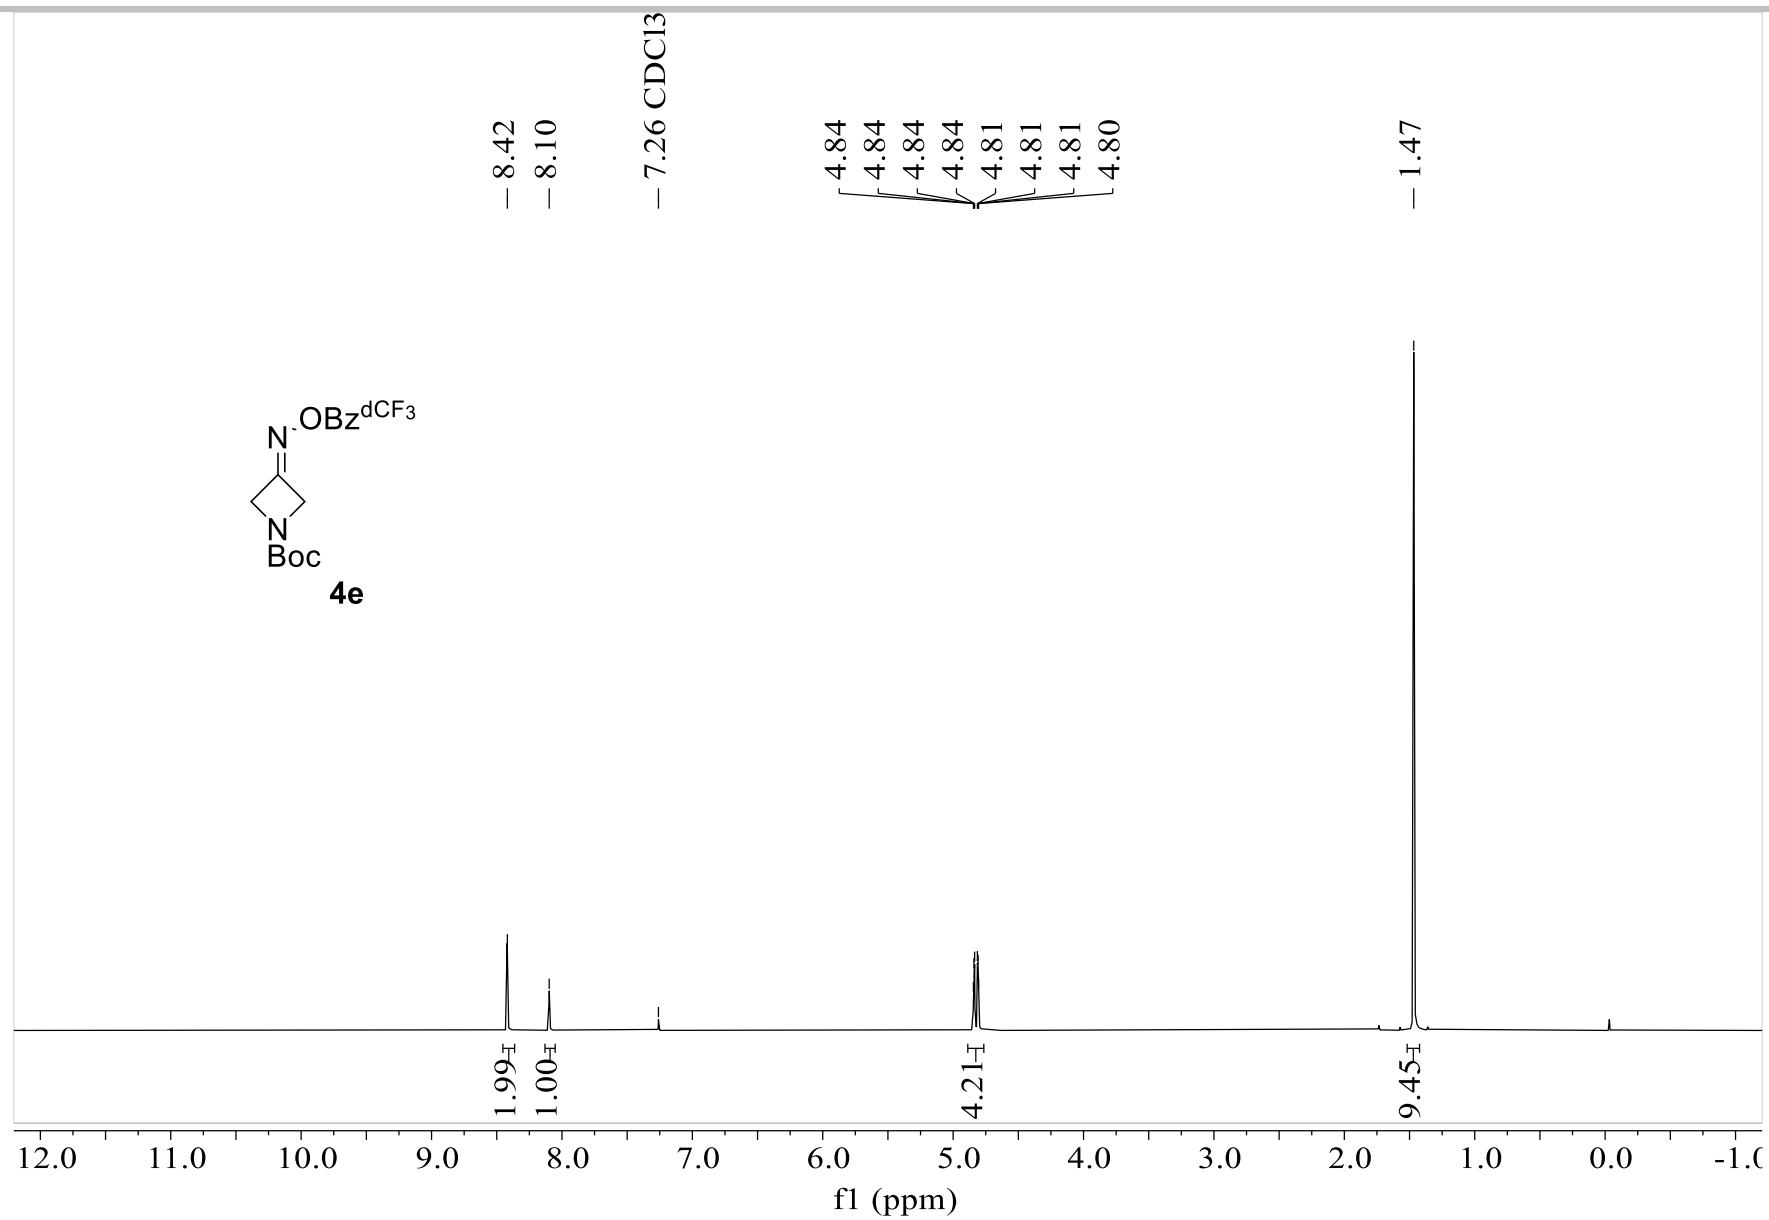

SUPPORTING INFORMATION

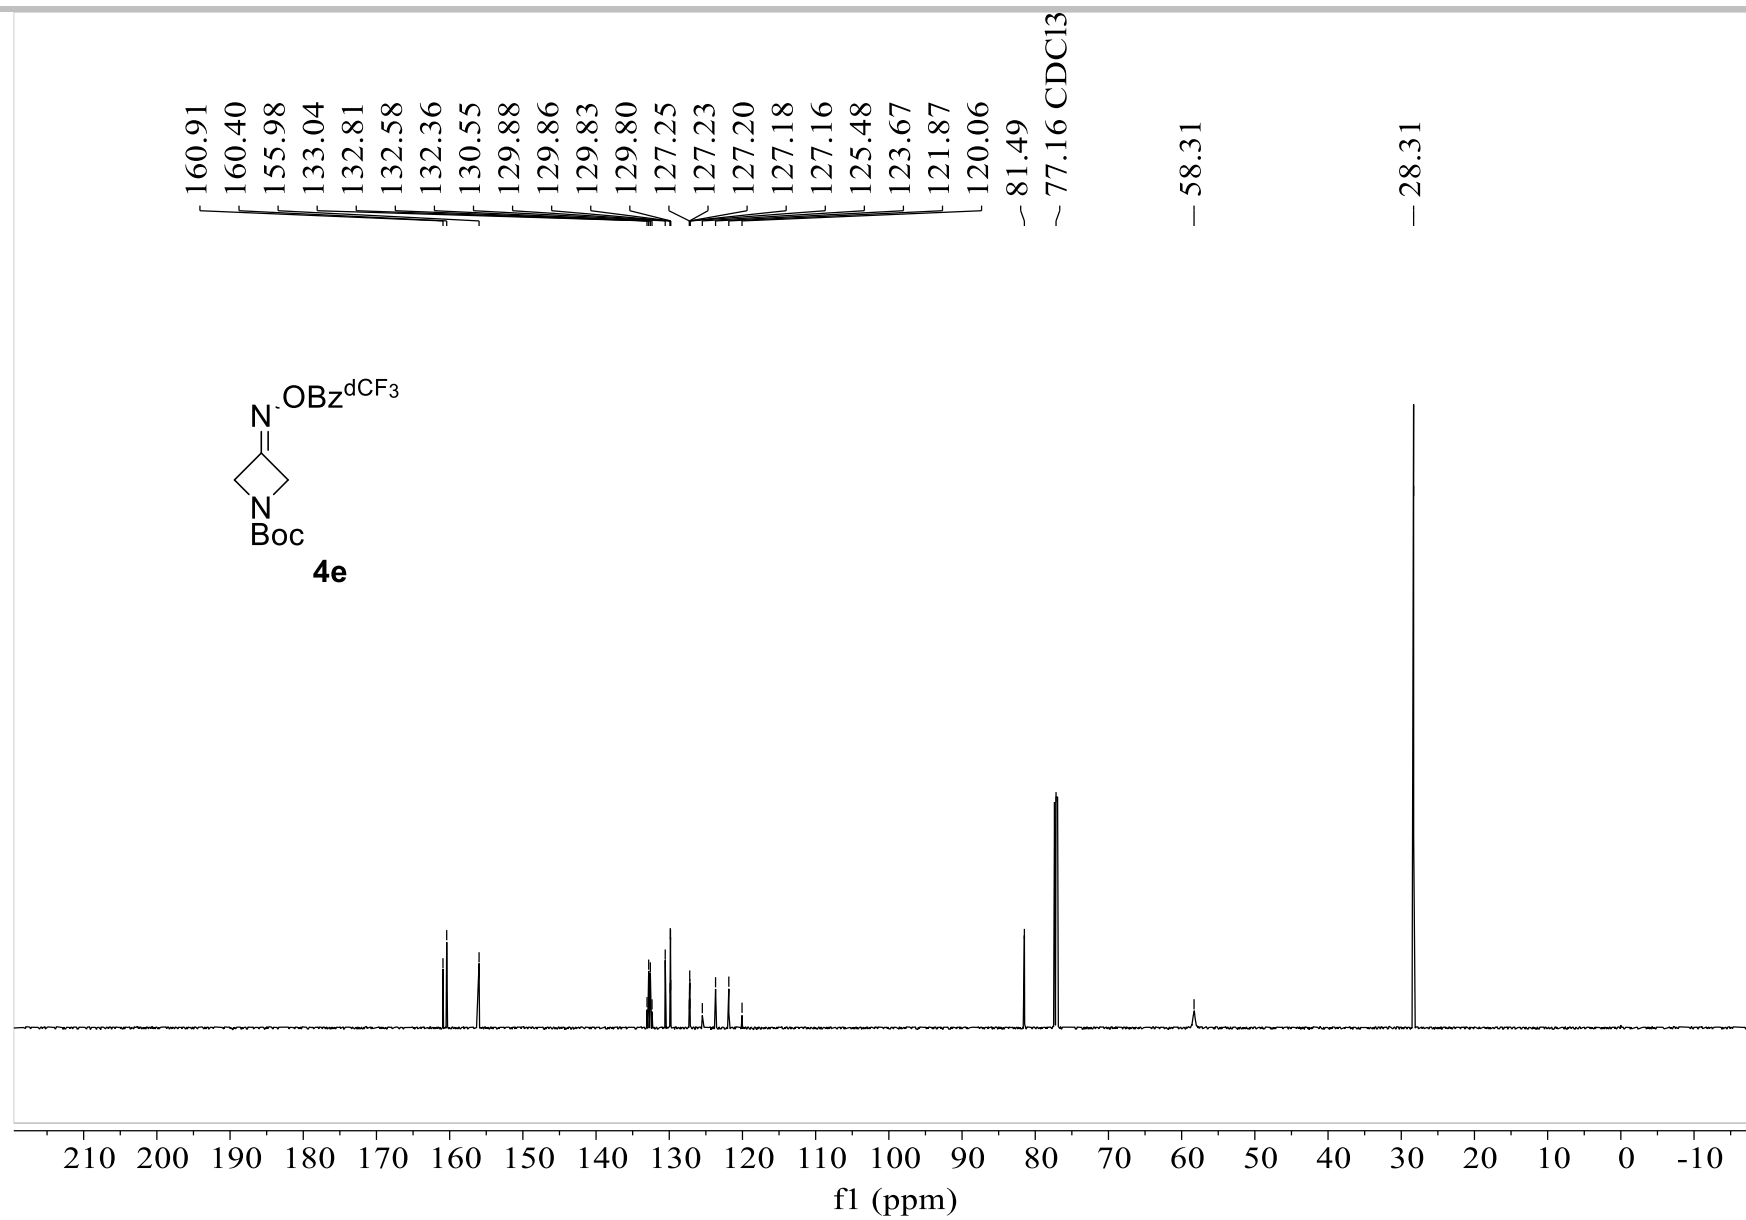

SUPPORTING INFORMATION

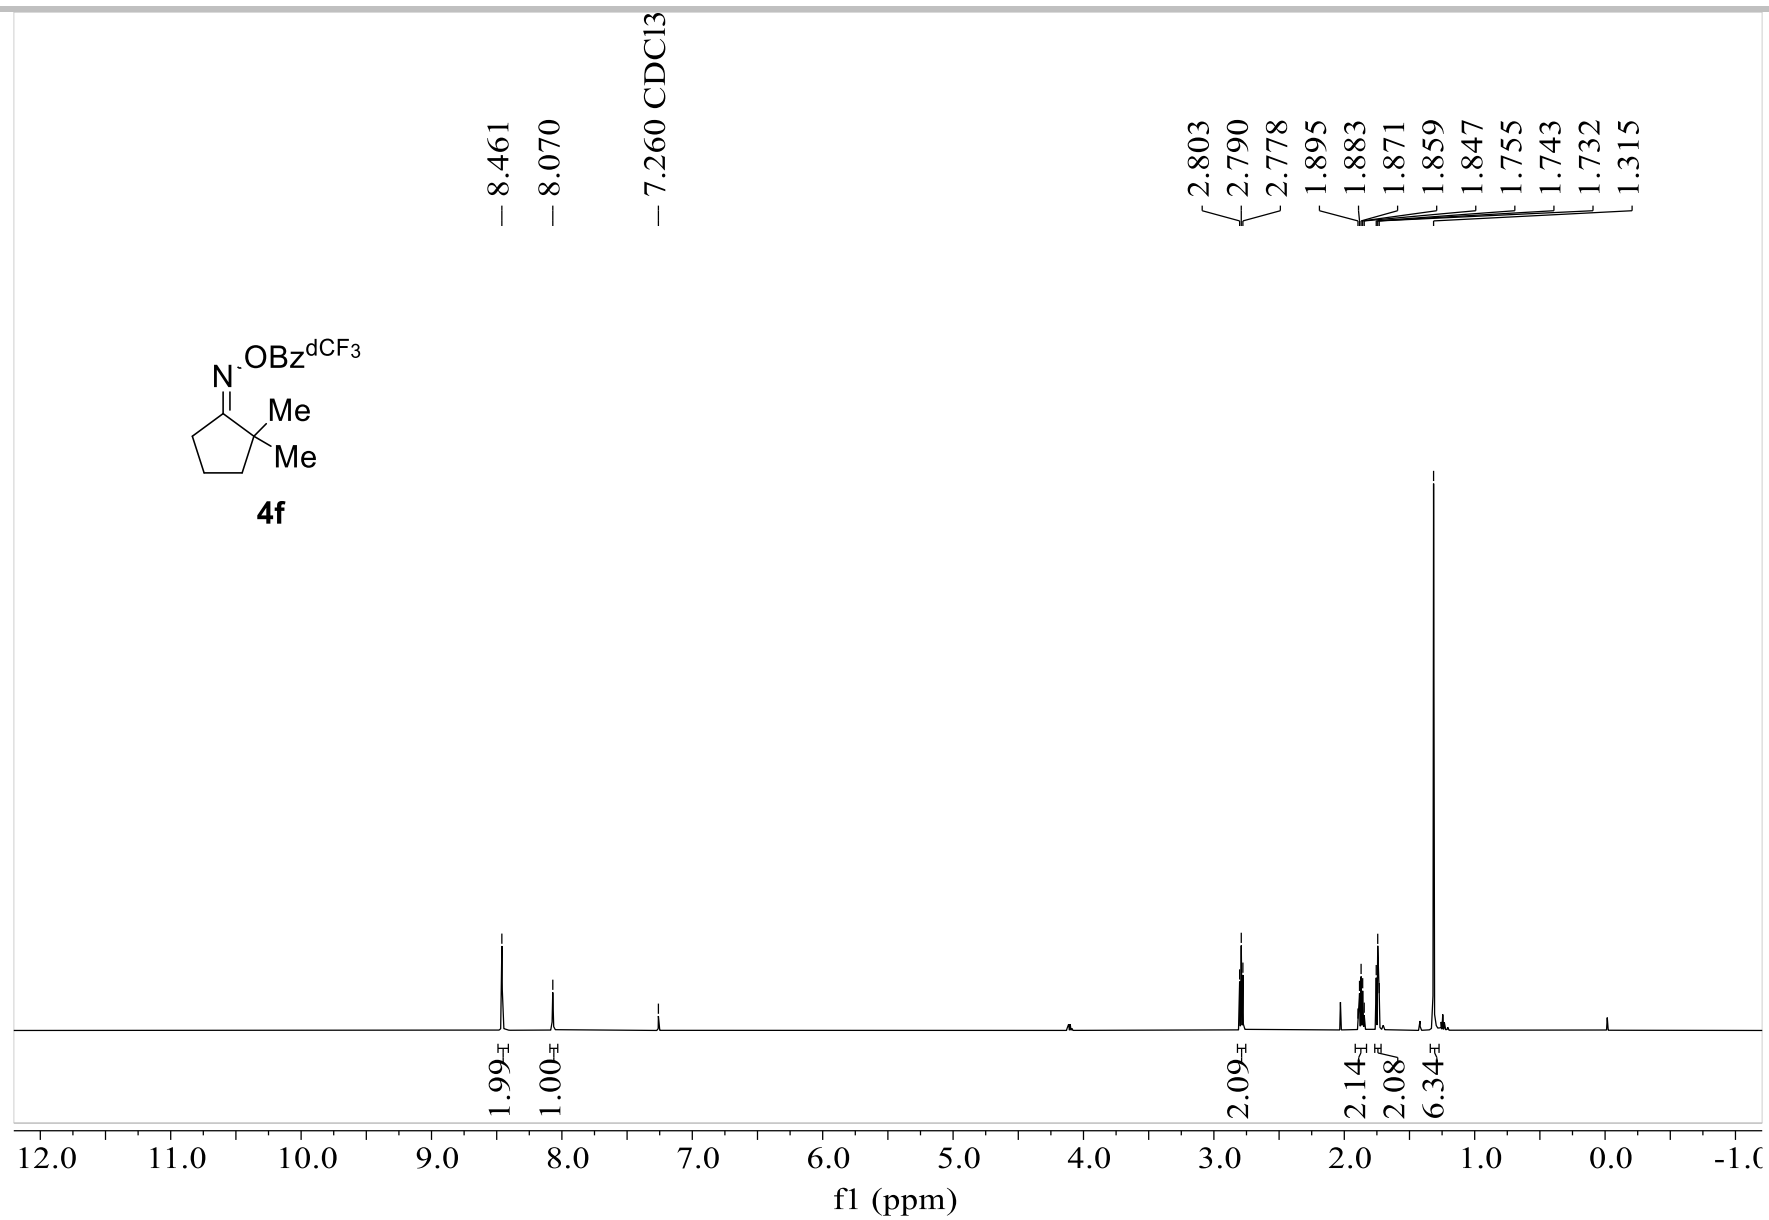

SUPPORTING INFORMATION

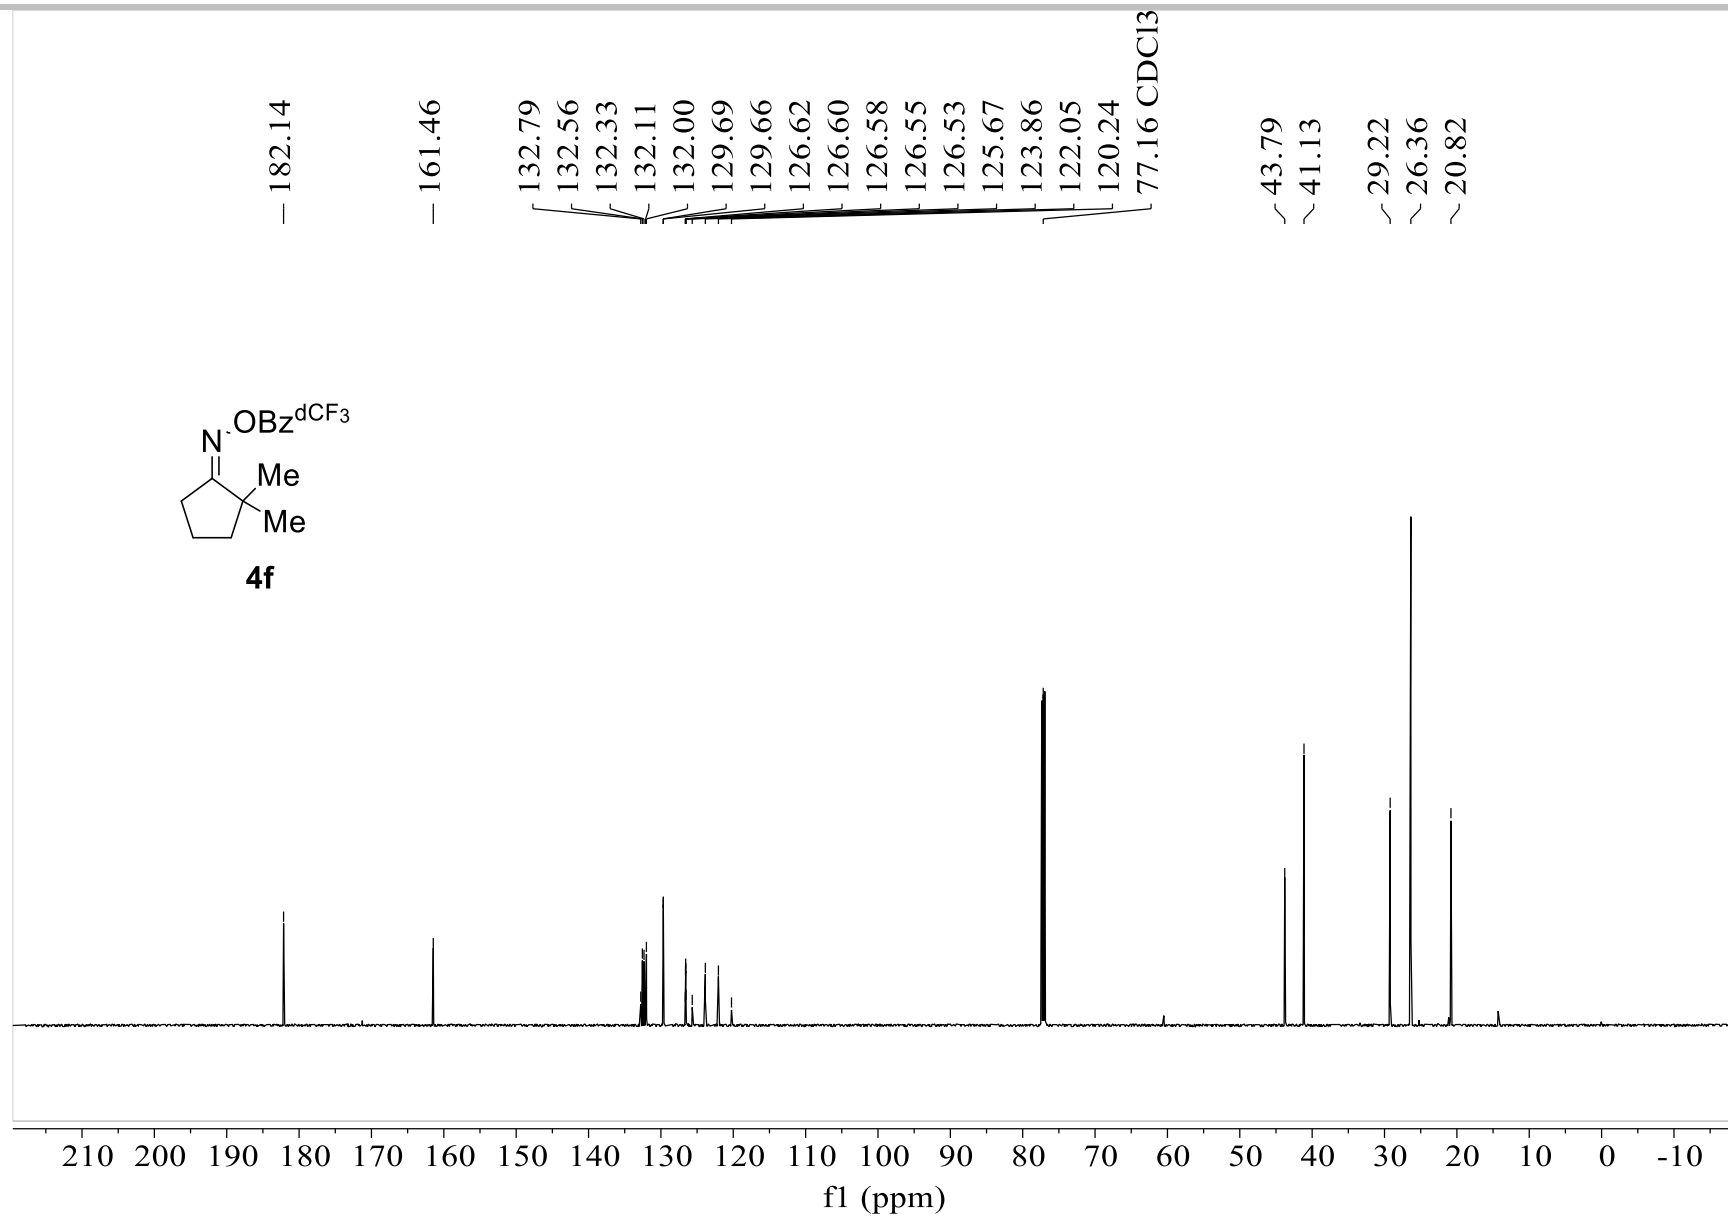

SUPPORTING INFORMATION

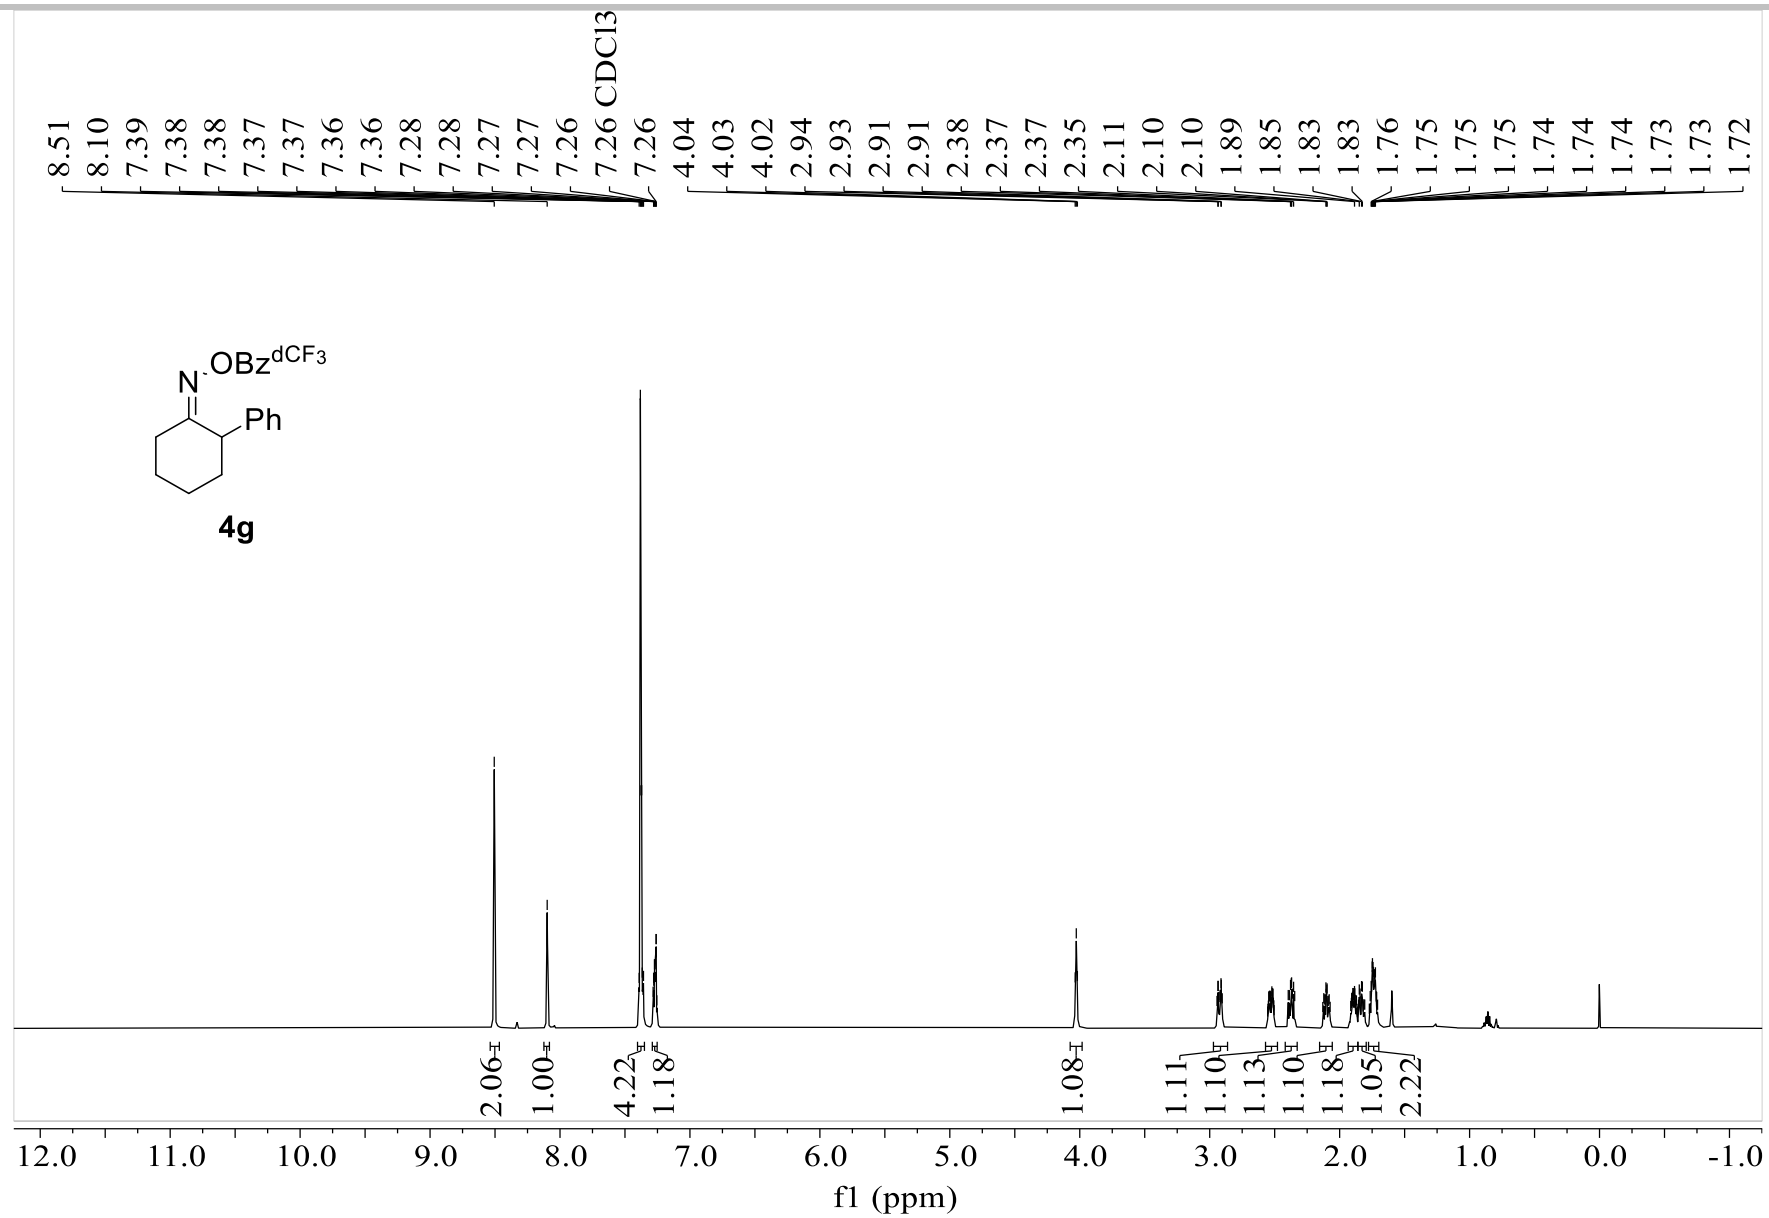



SUPPORTING INFORMATION

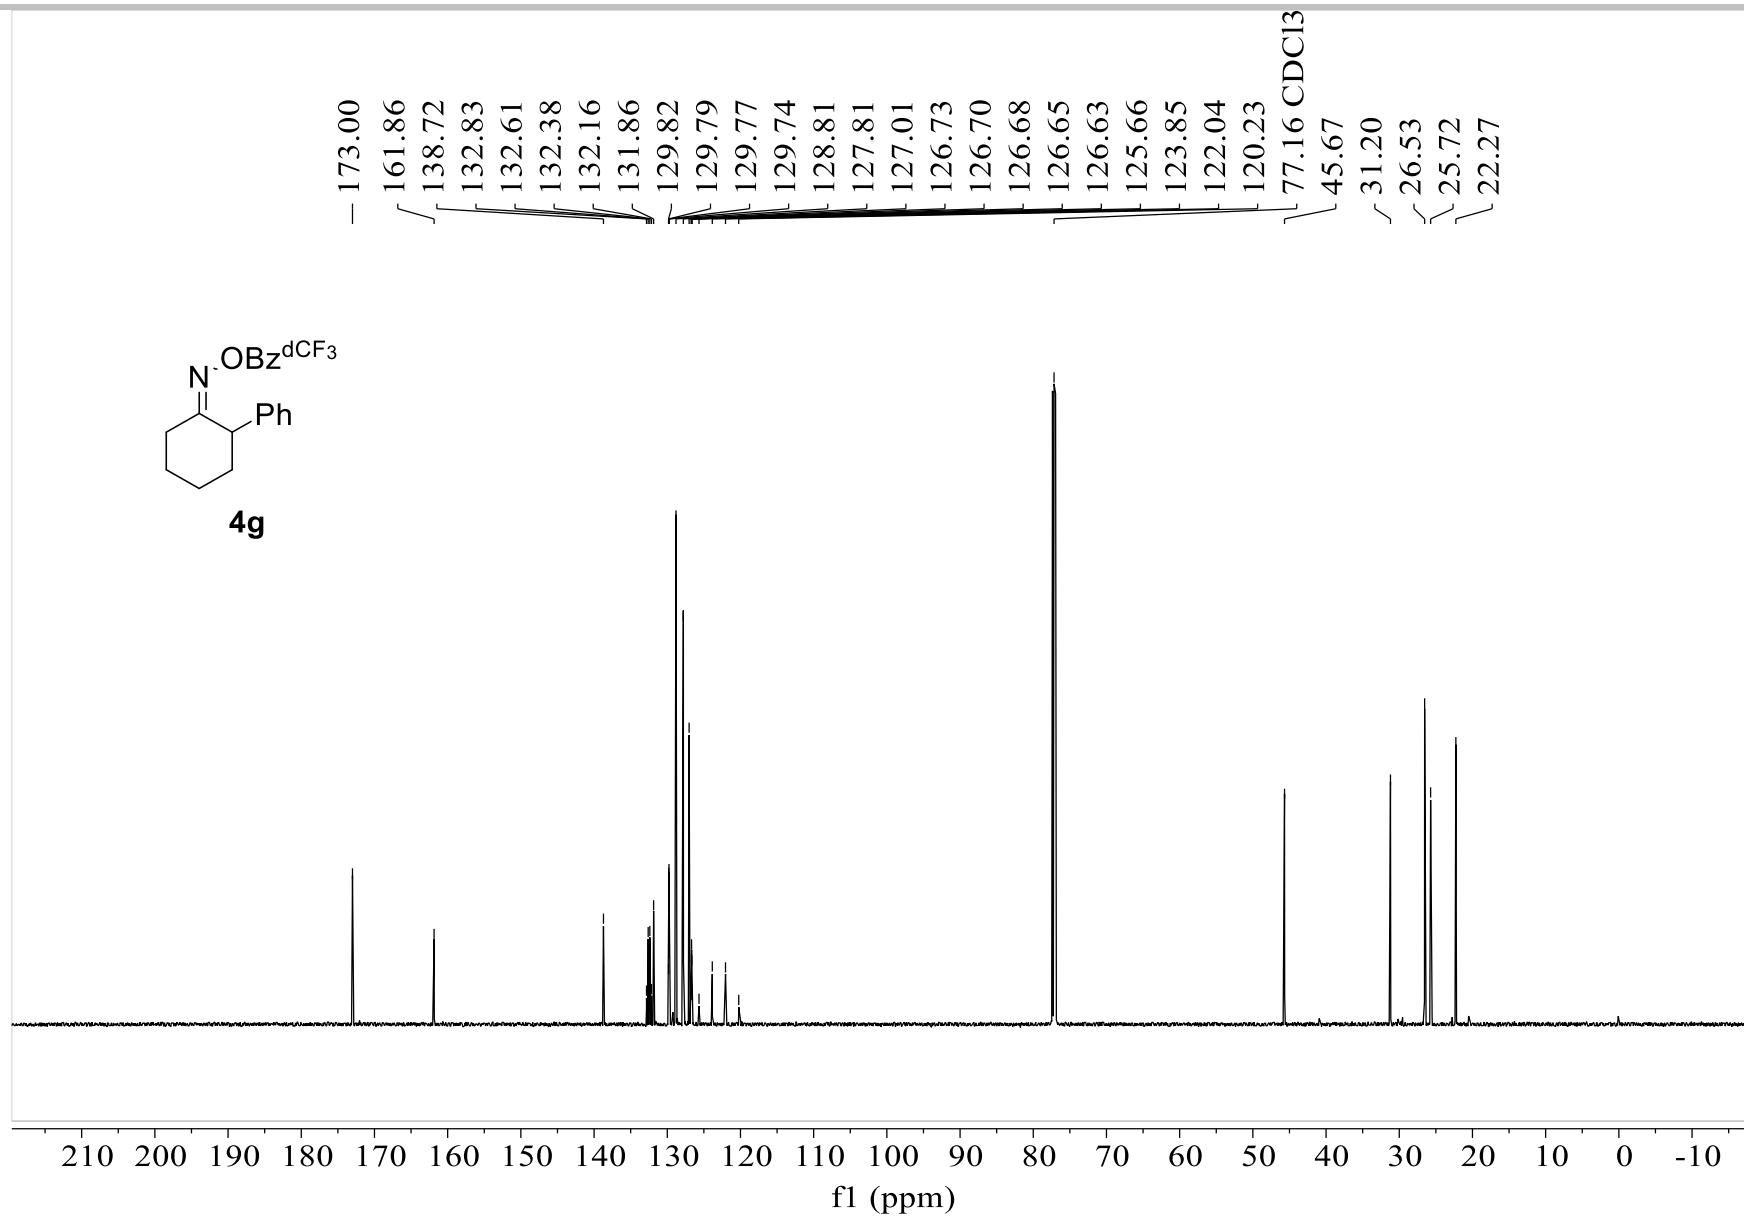

SUPPORTING INFORMATION

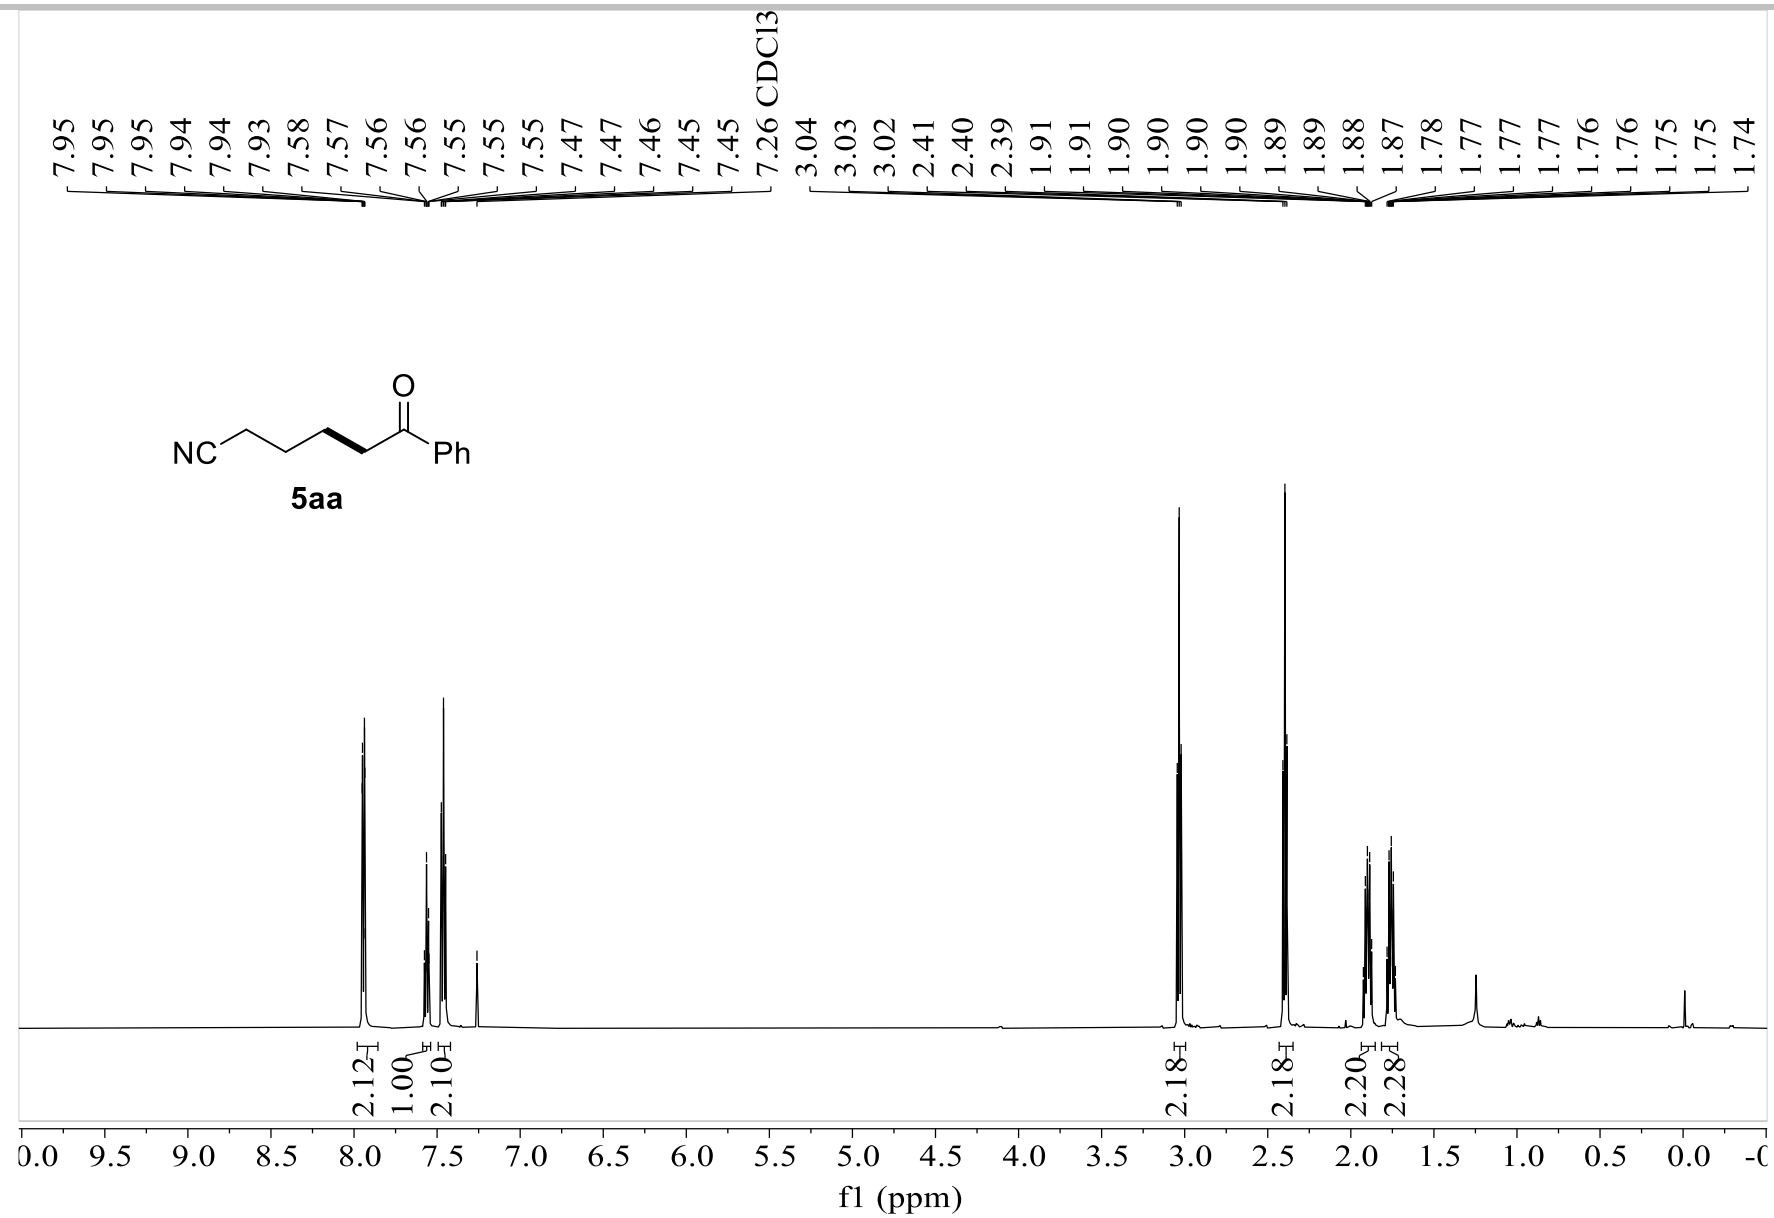

# SUPPORTING INFORMATION

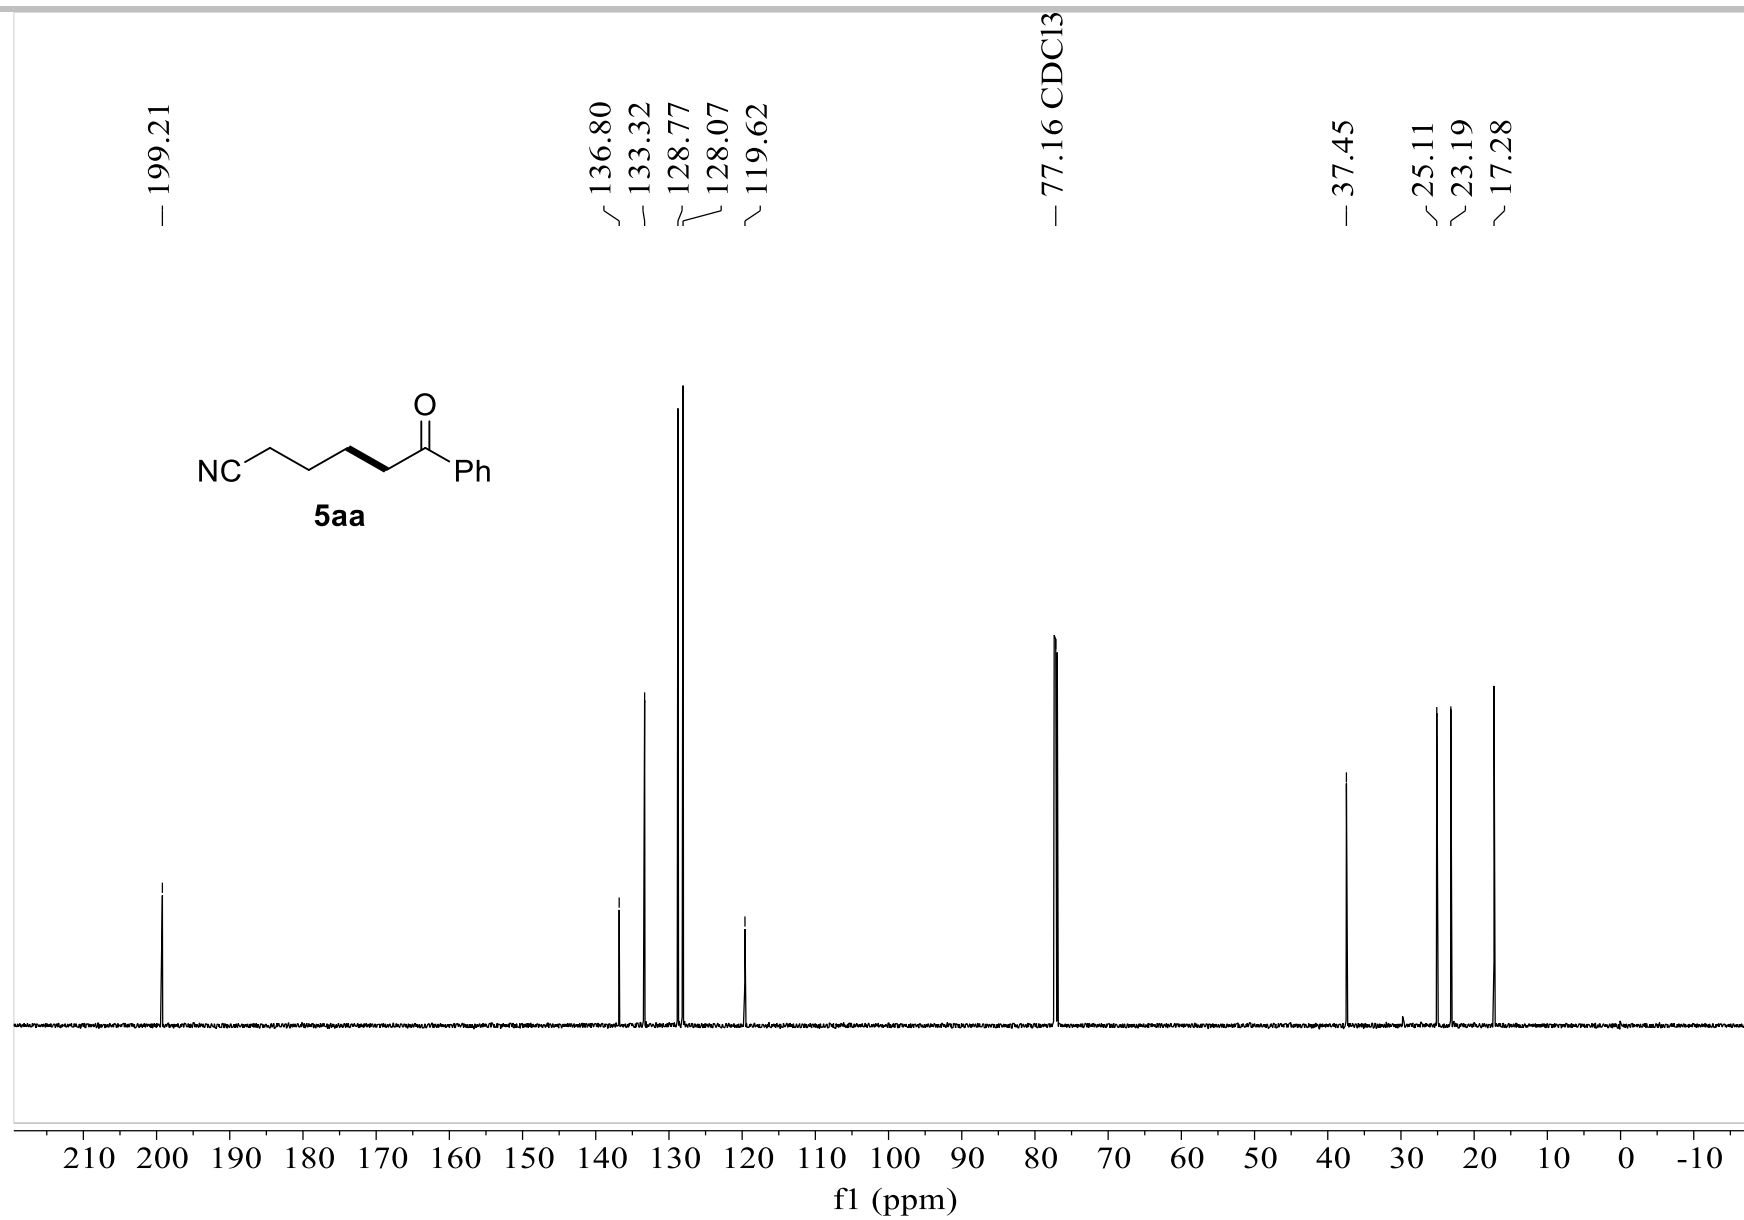

SUPPORTING INFORMATION

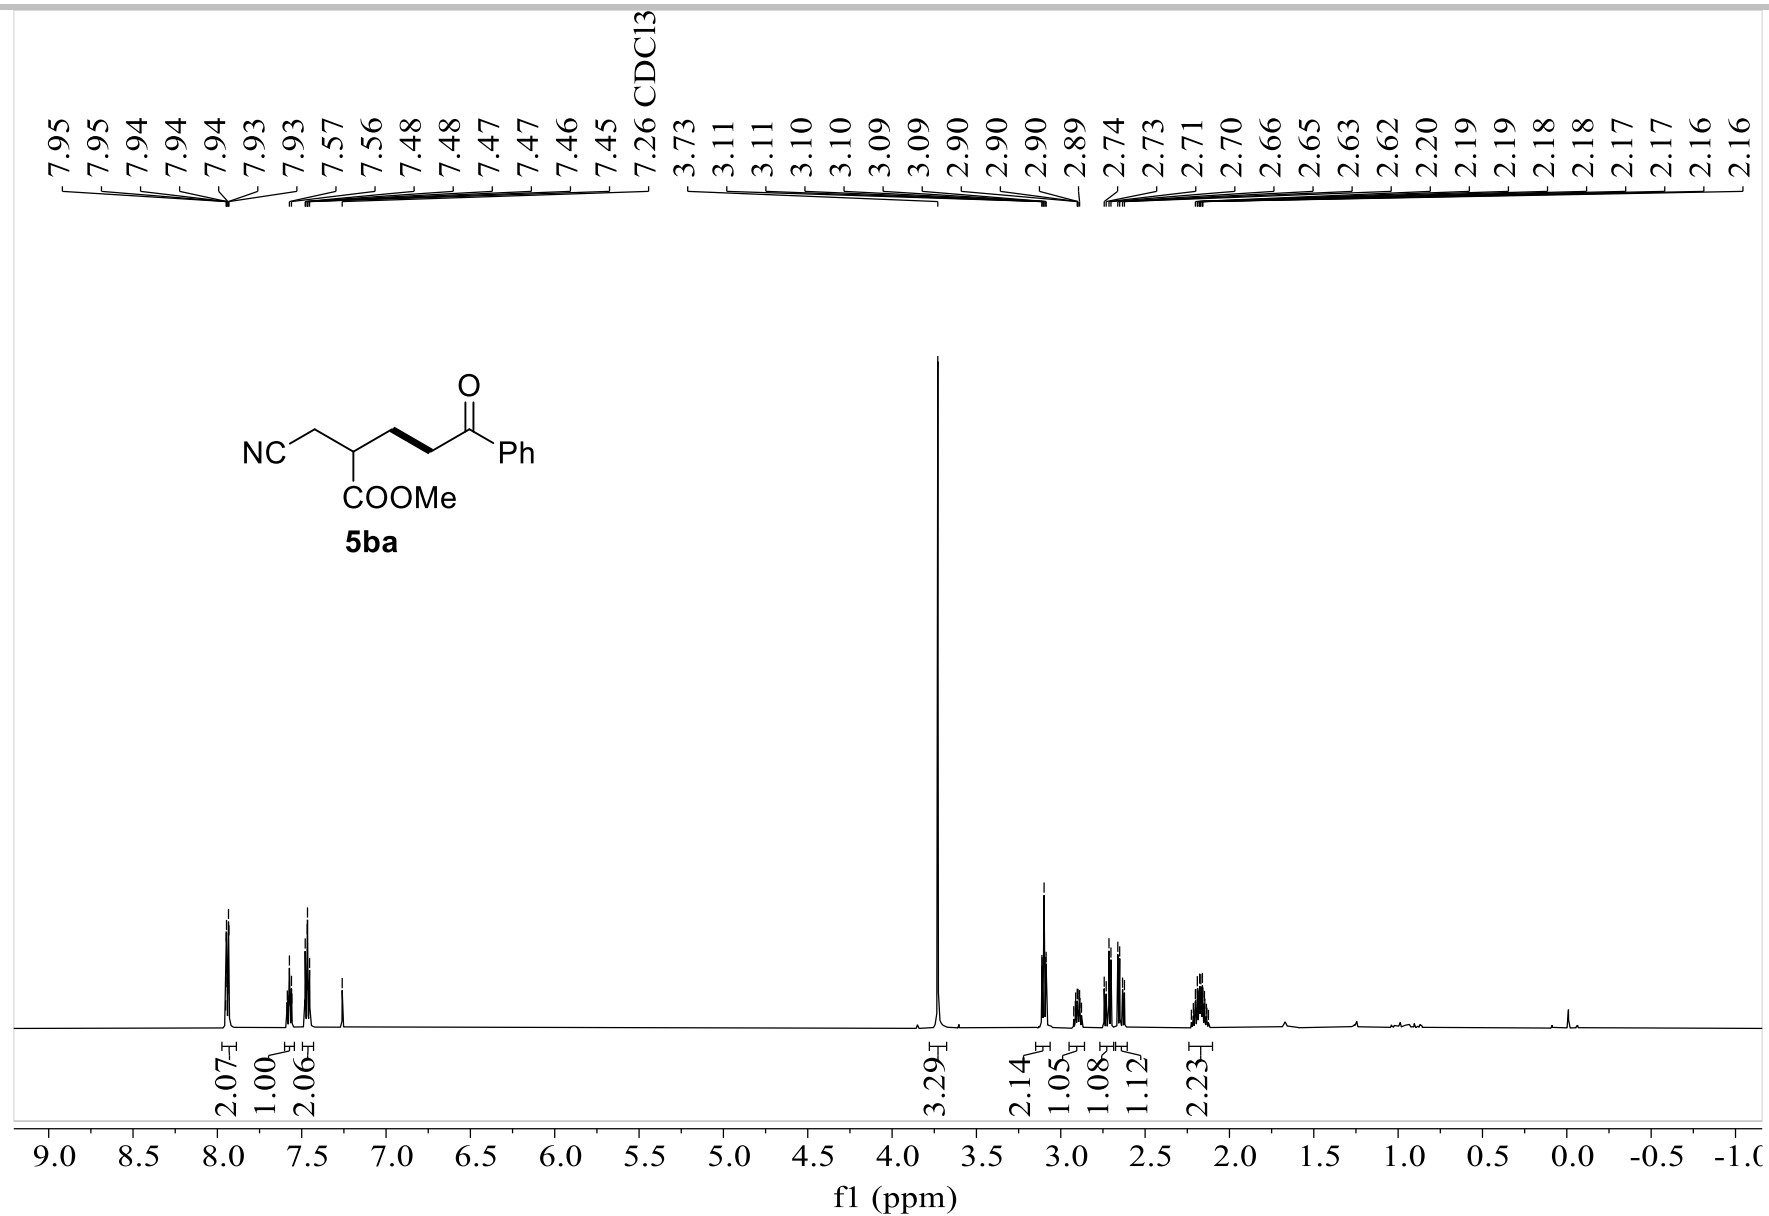

# SUPPORTING INFORMATION

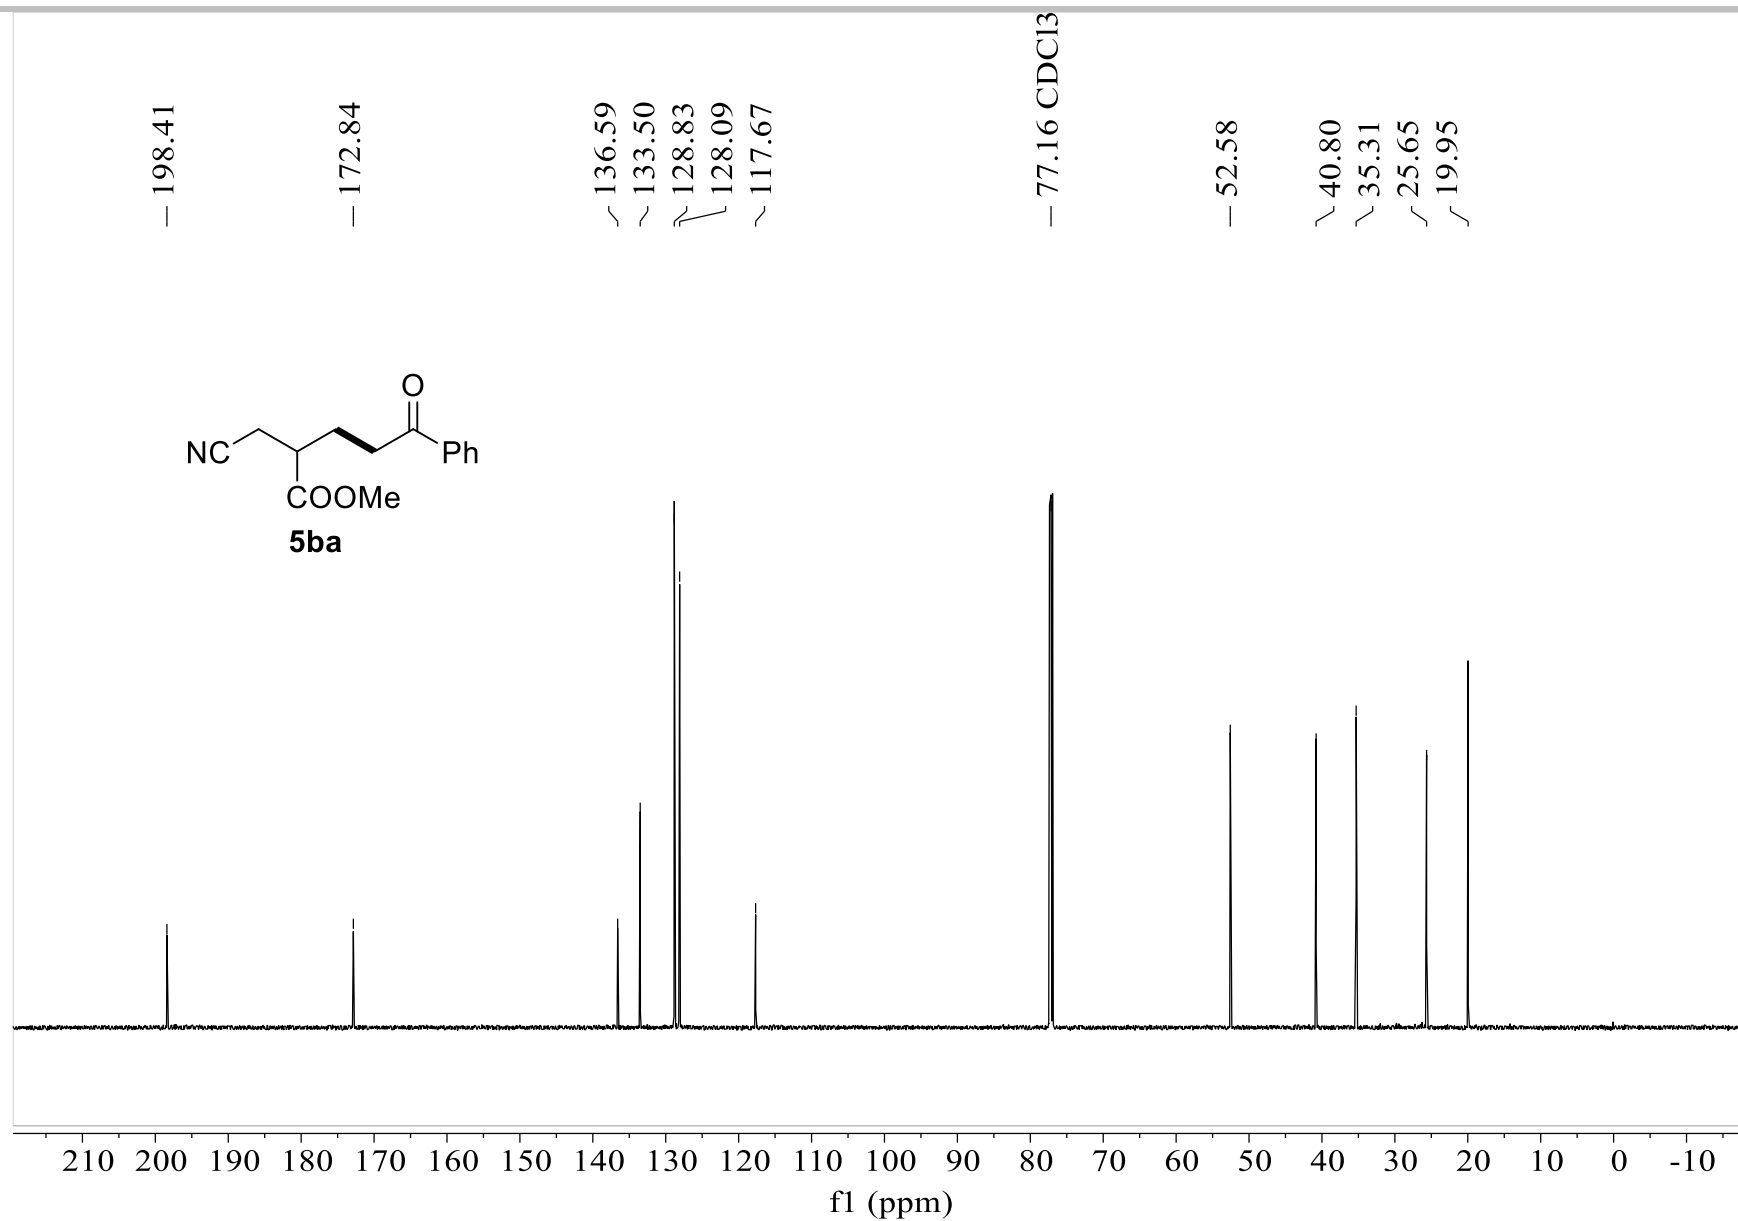

SUPPORTING INFORMATION

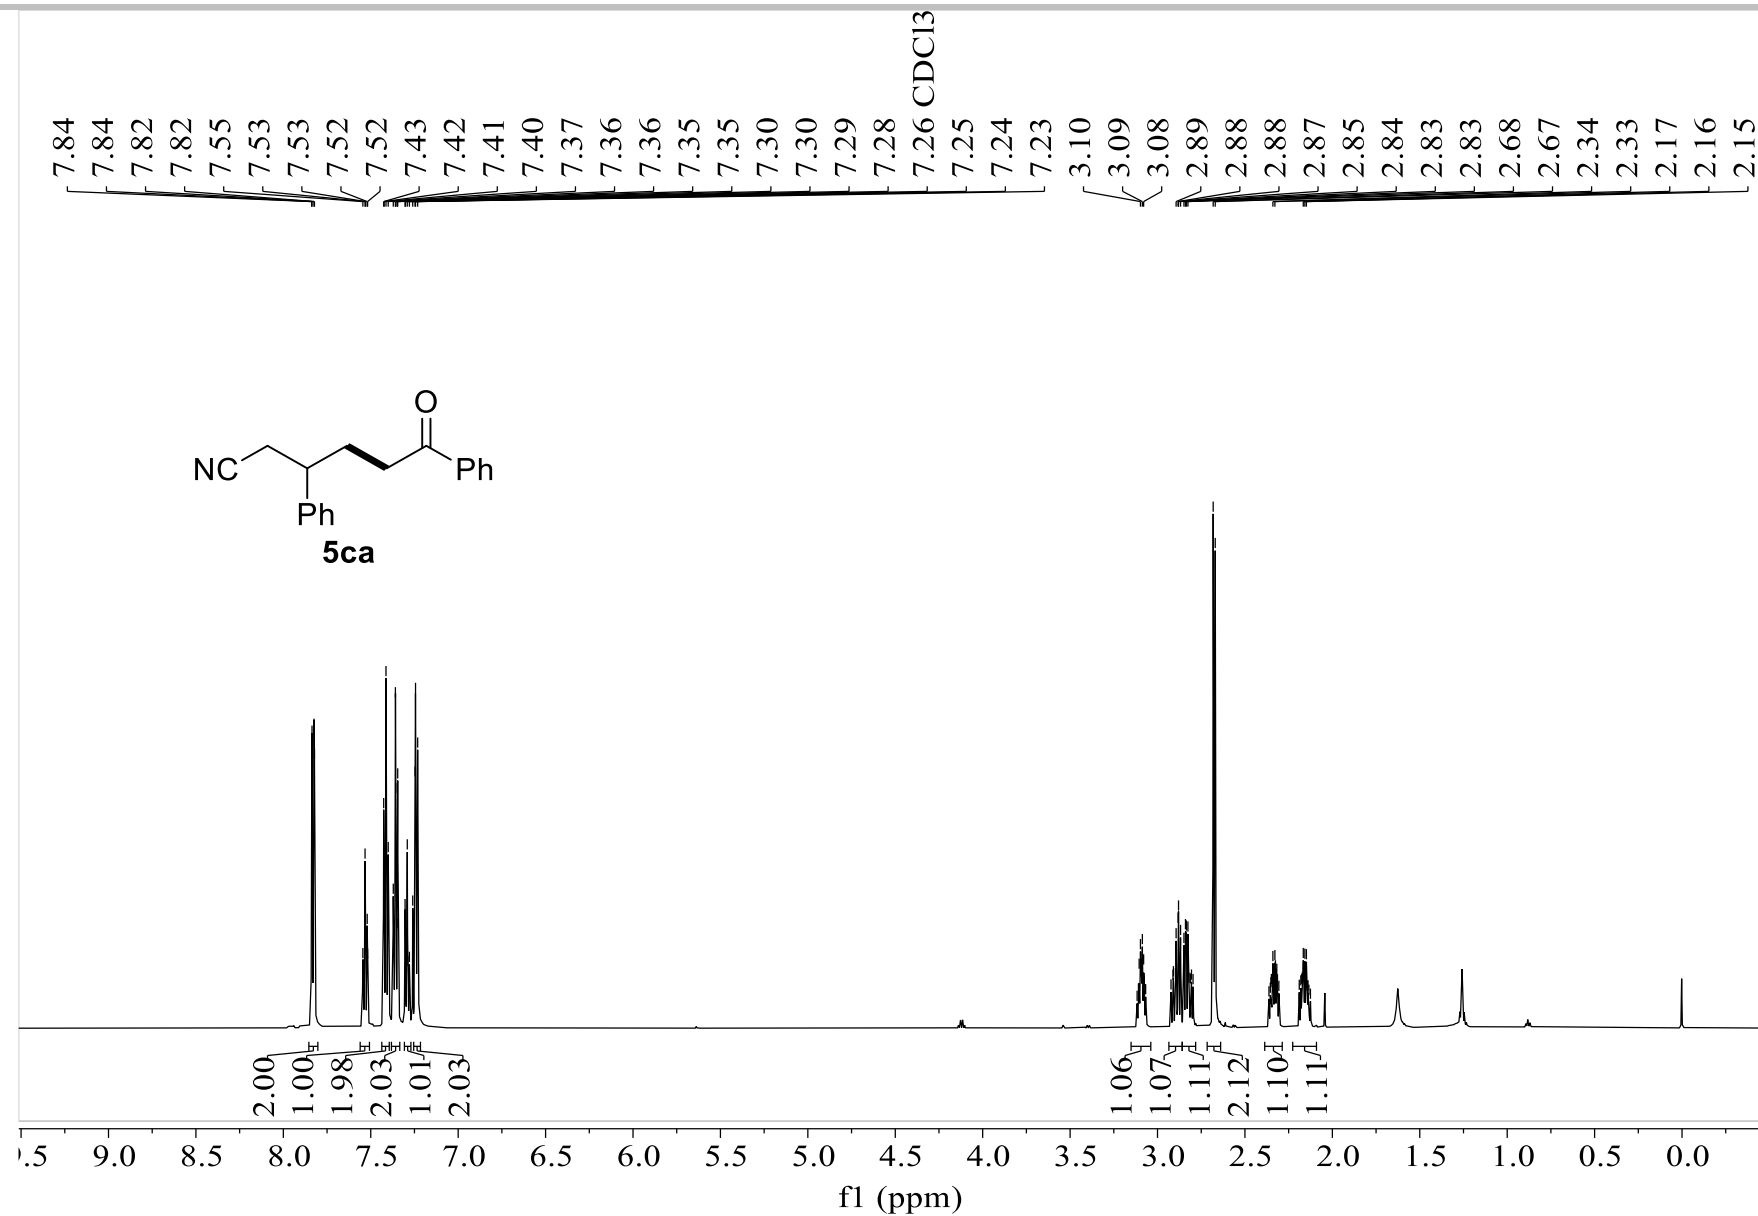

SUPPORTING INFORMATION

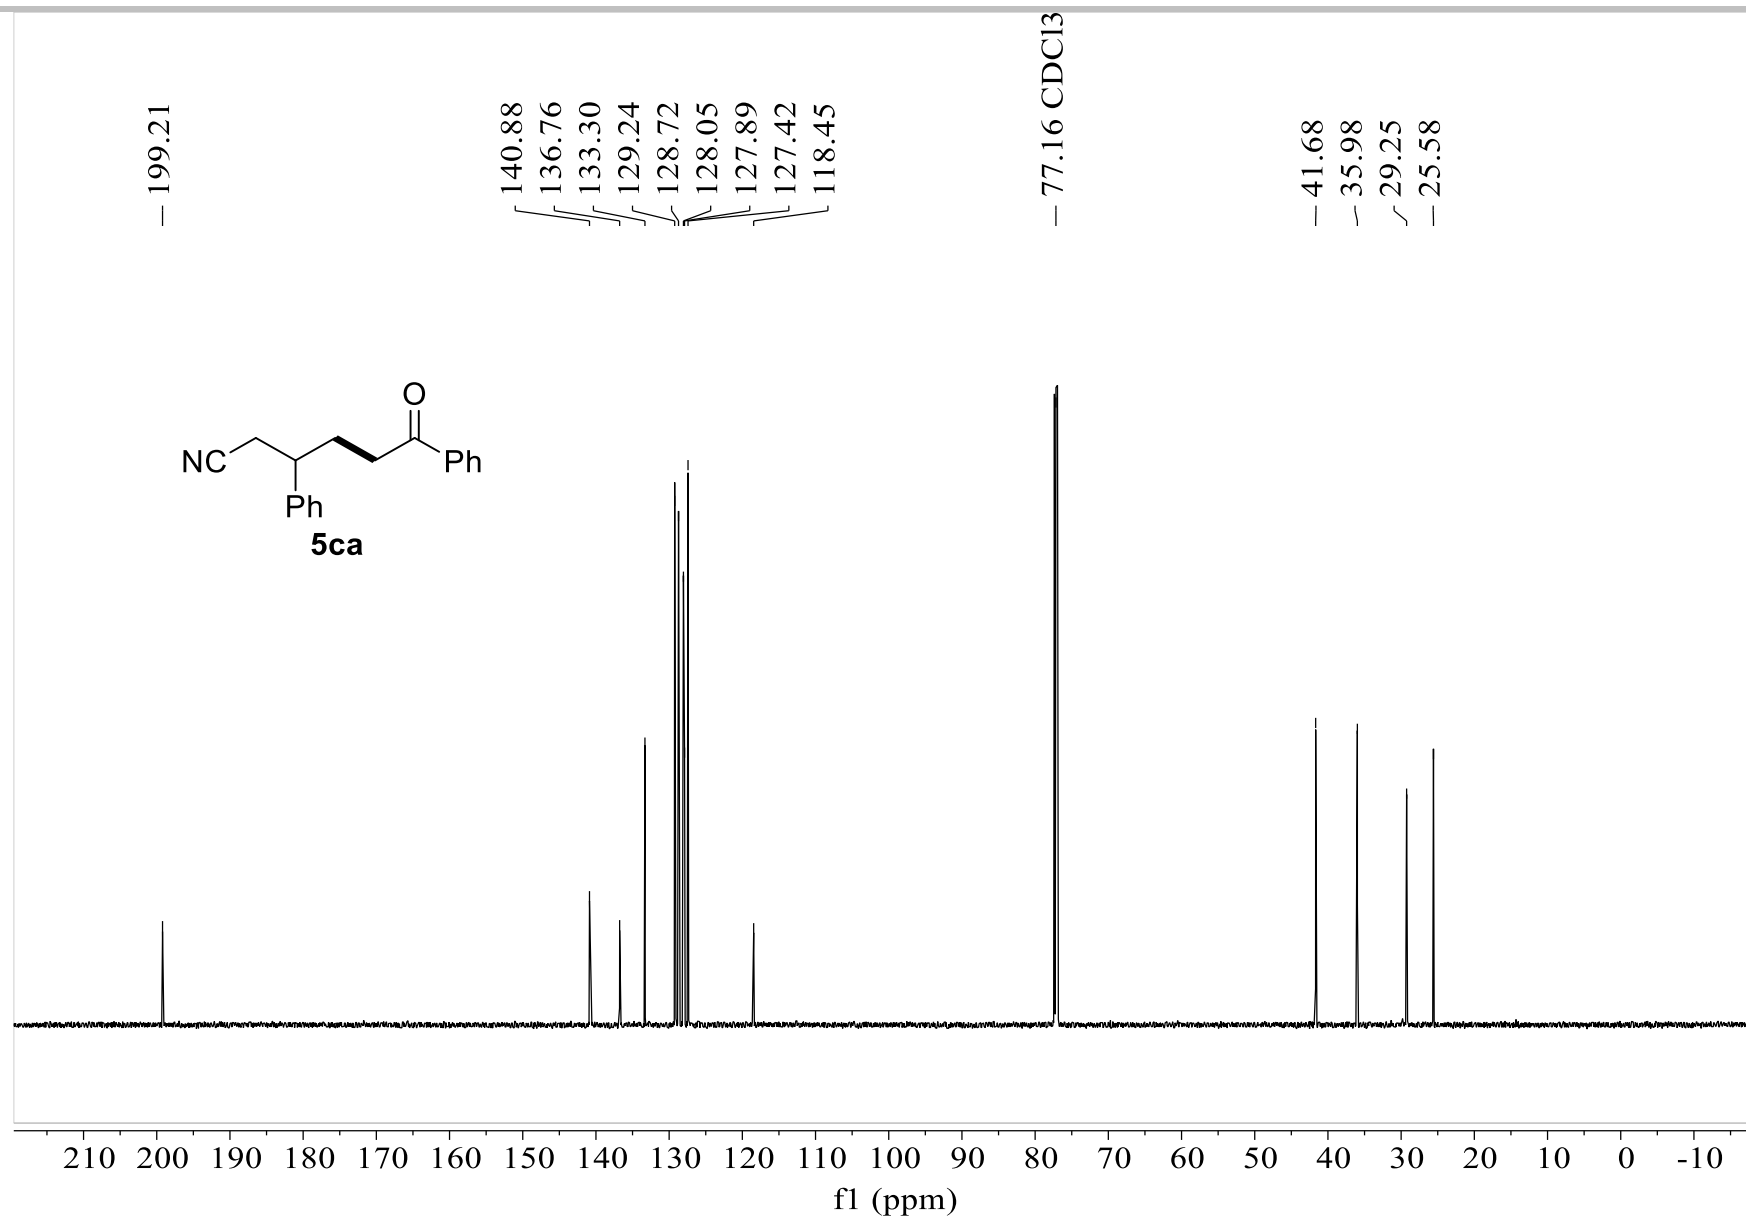

SUPPORTING INFORMATION

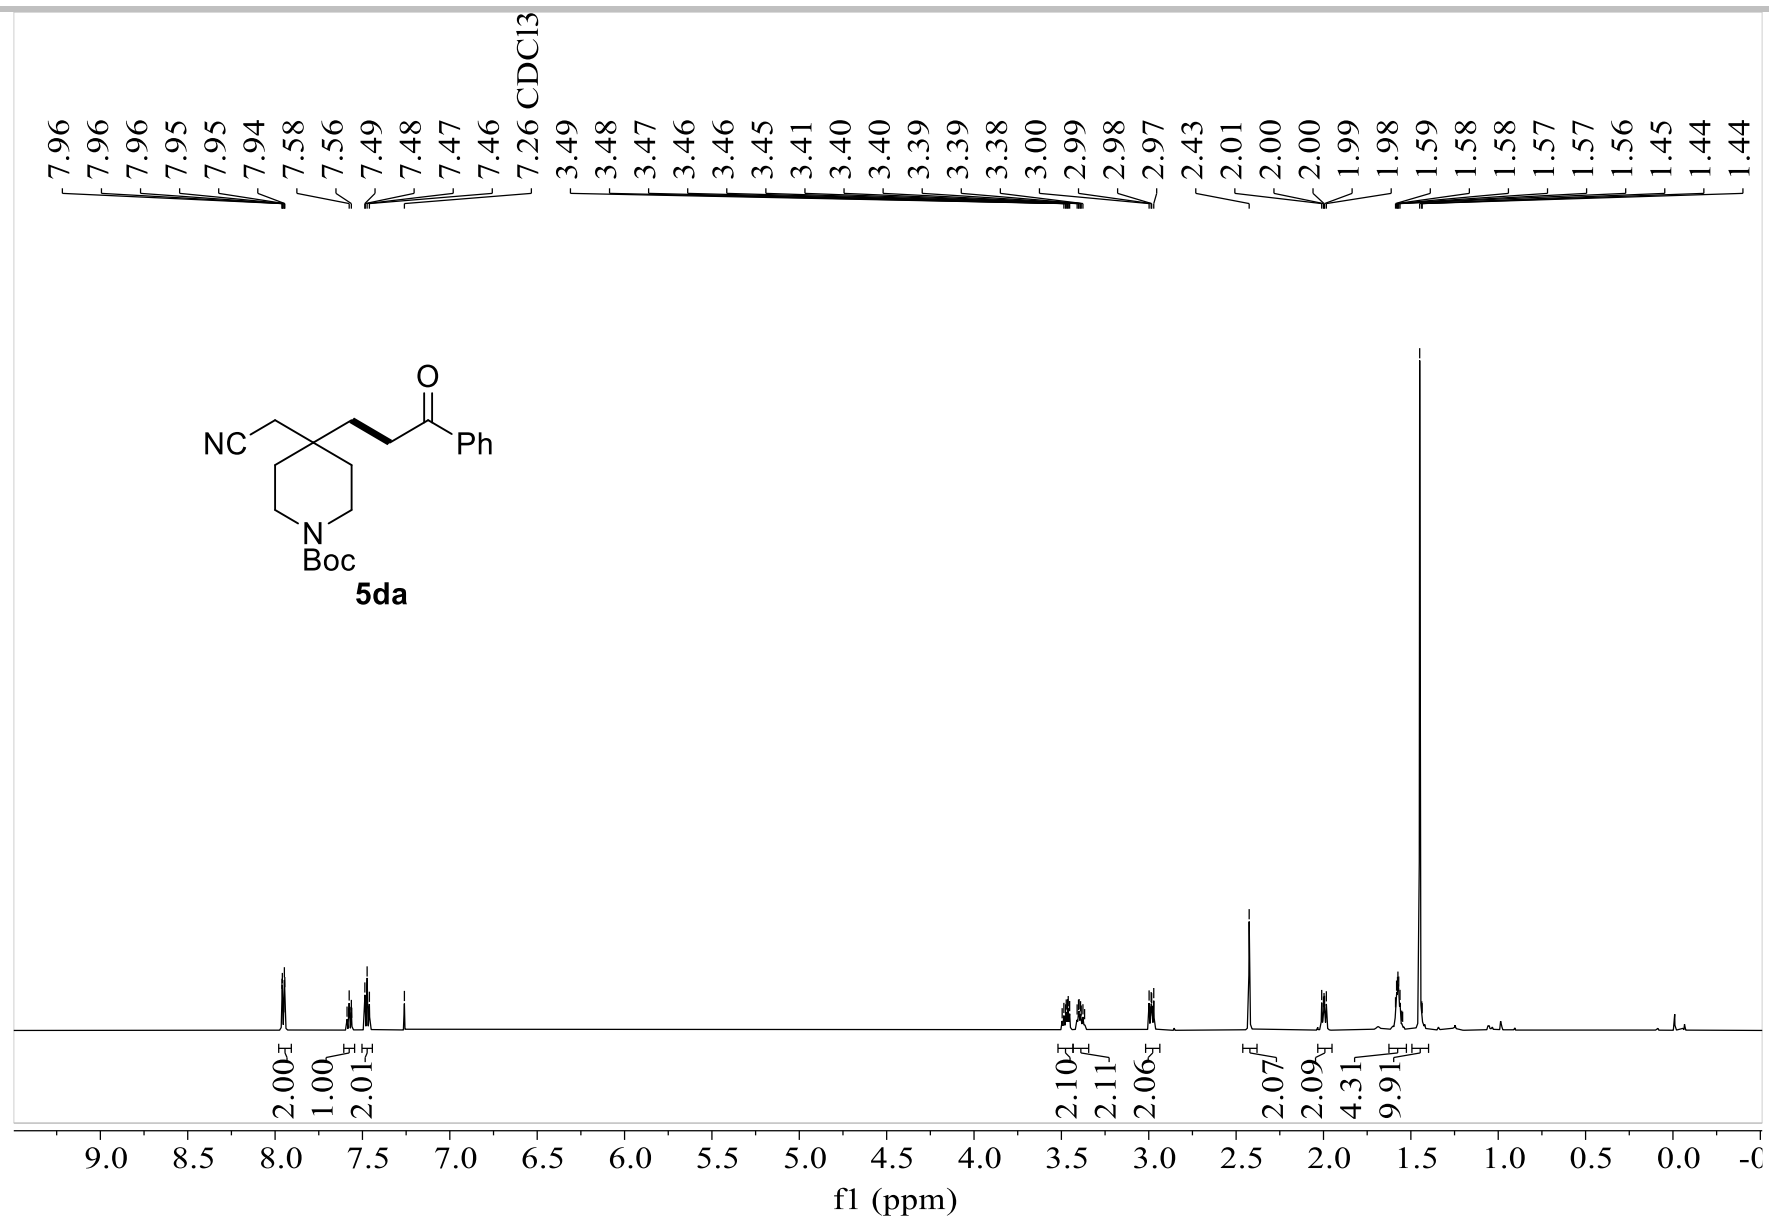



SUPPORTING INFORMATION

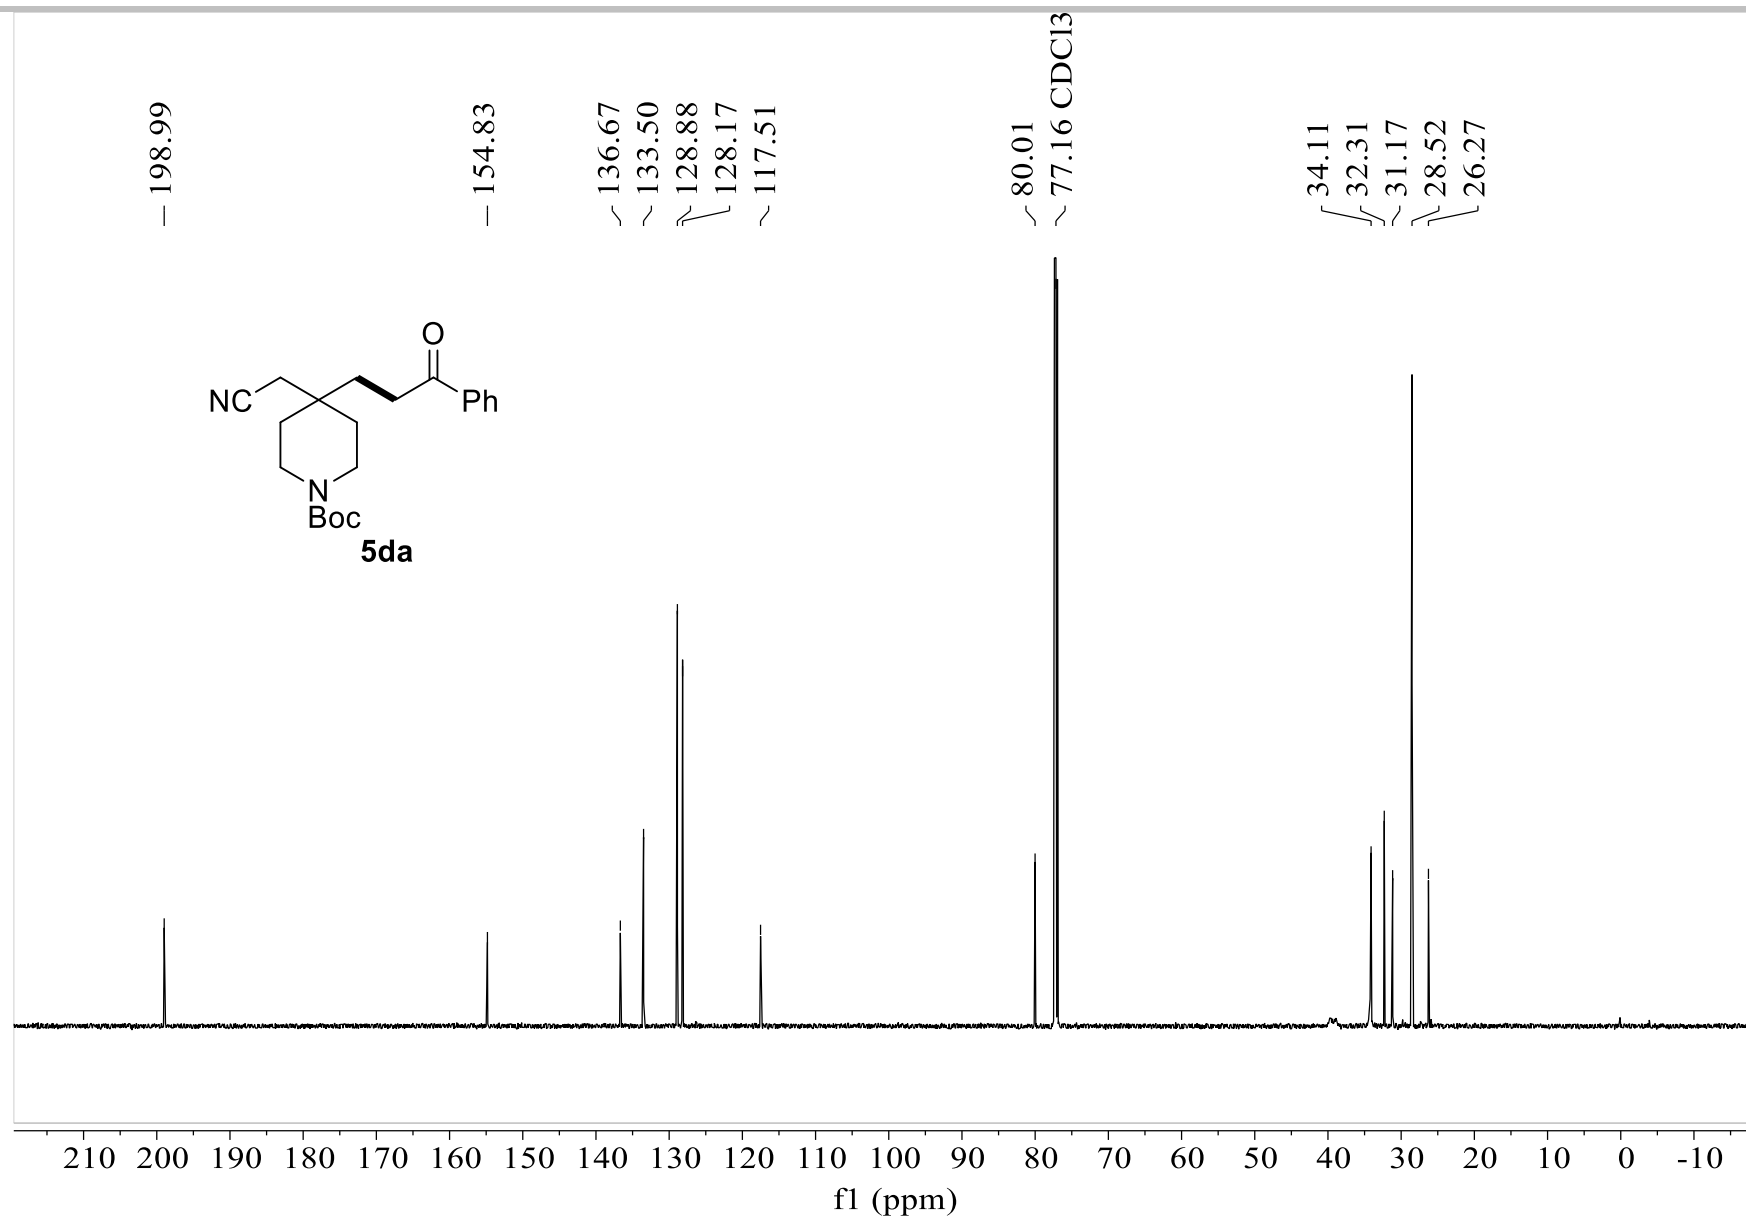

SUPPORTING INFORMATION

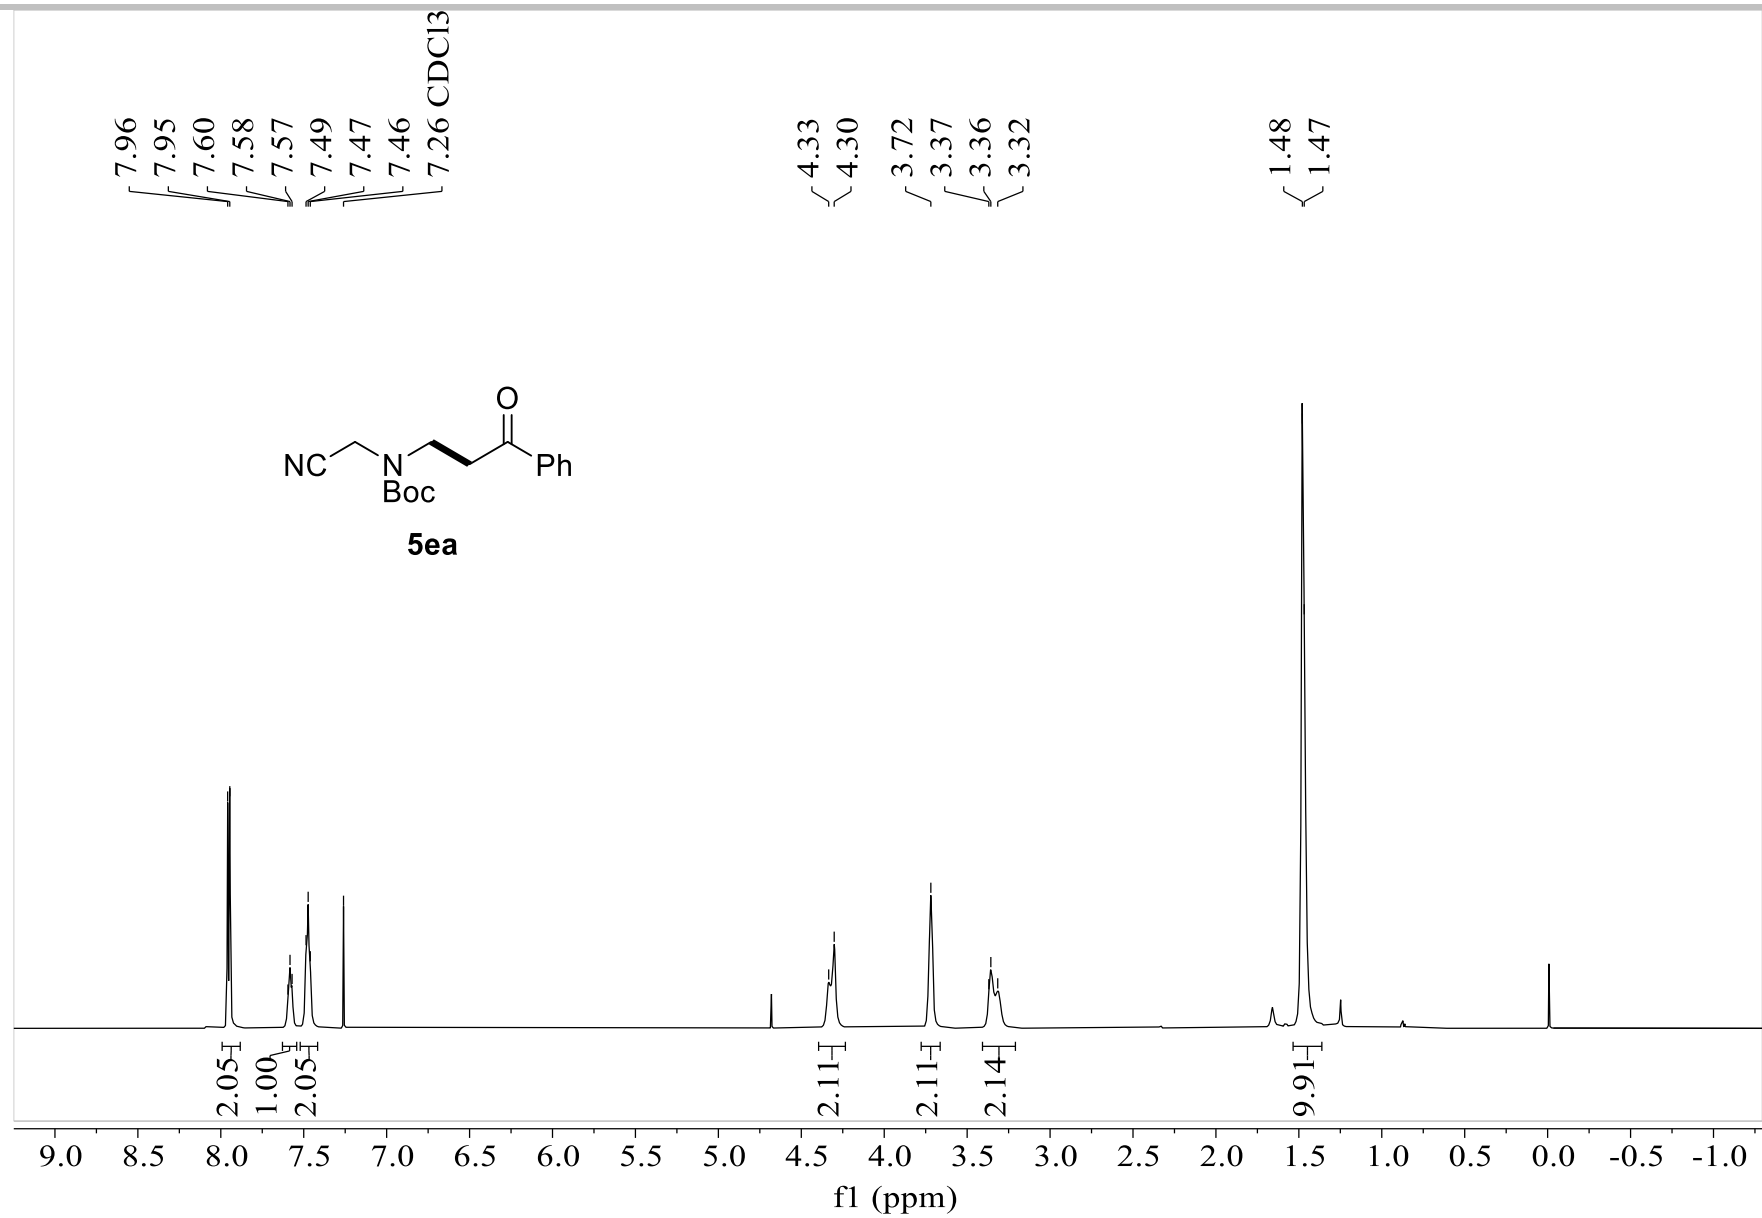

SUPPORTING INFORMATION

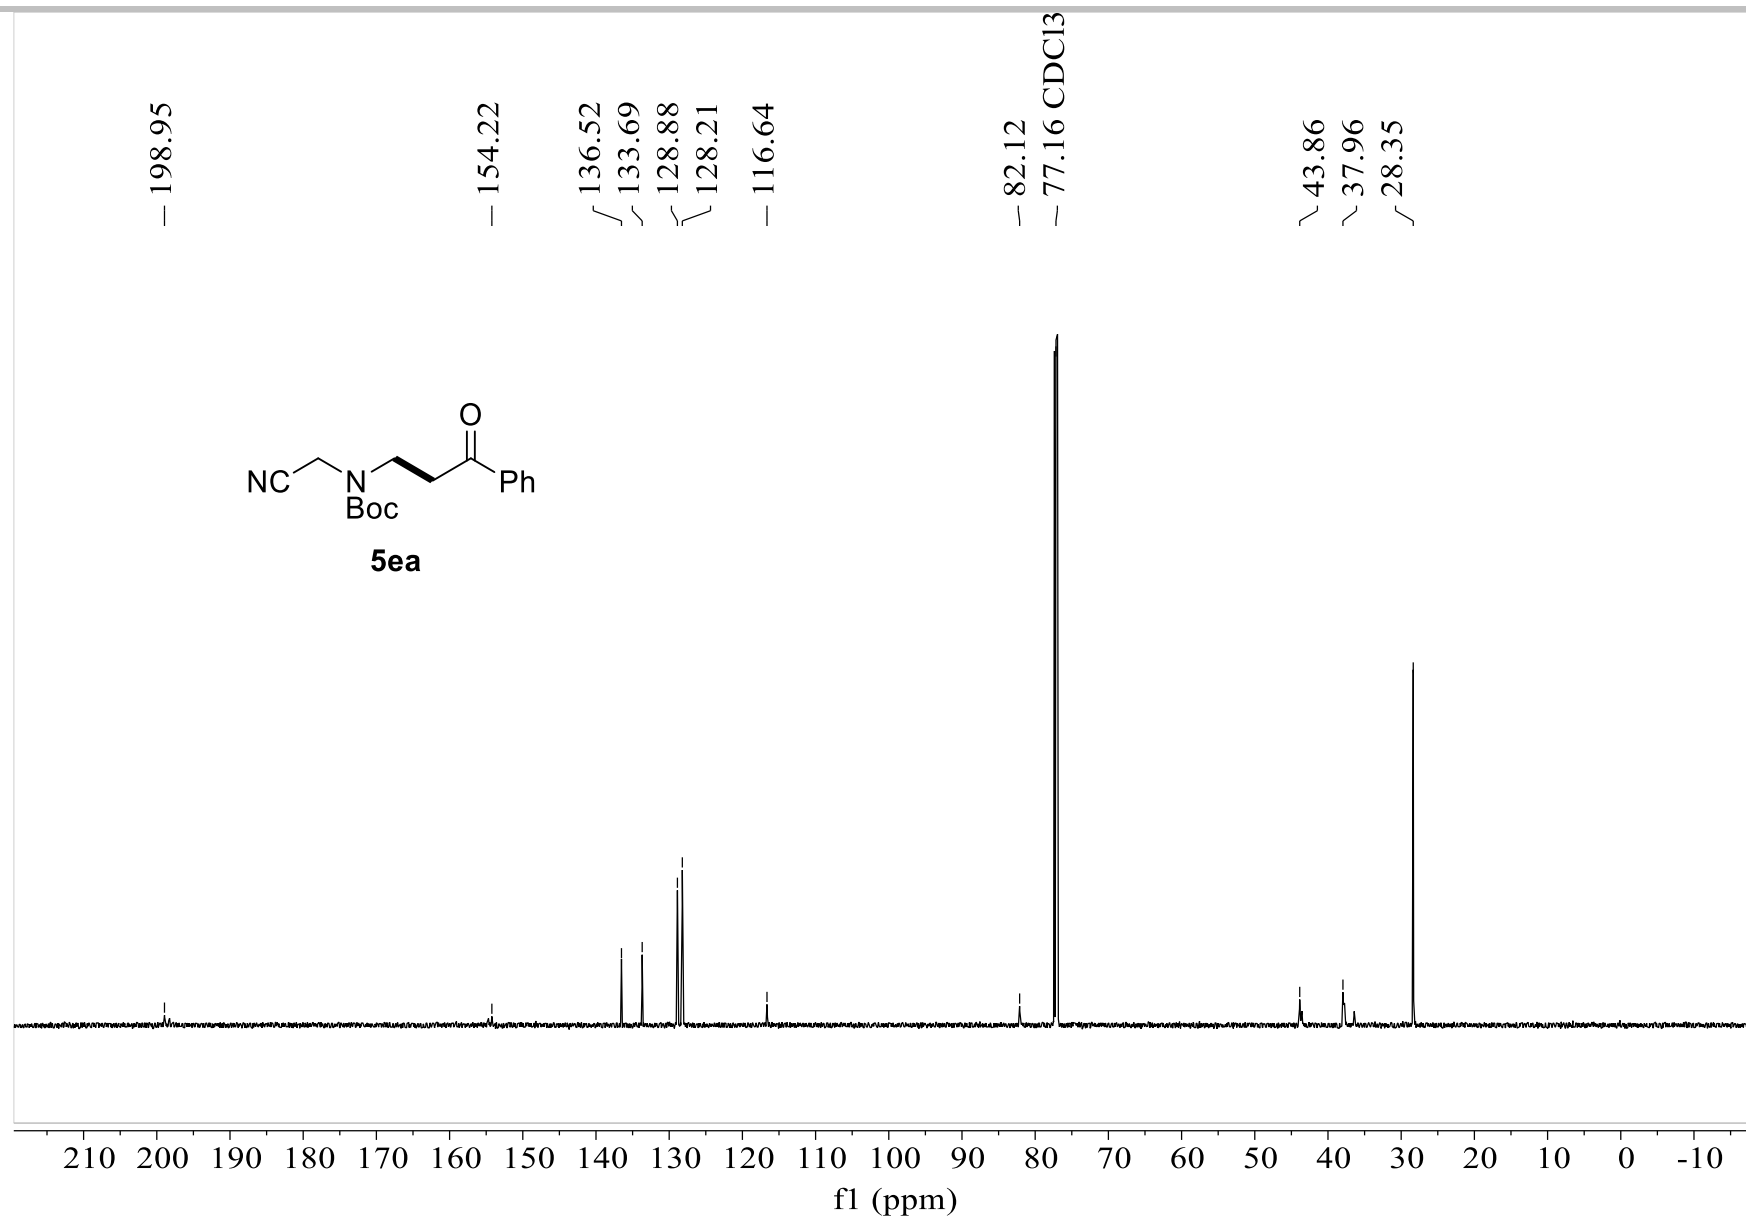

SUPPORTING INFORMATION

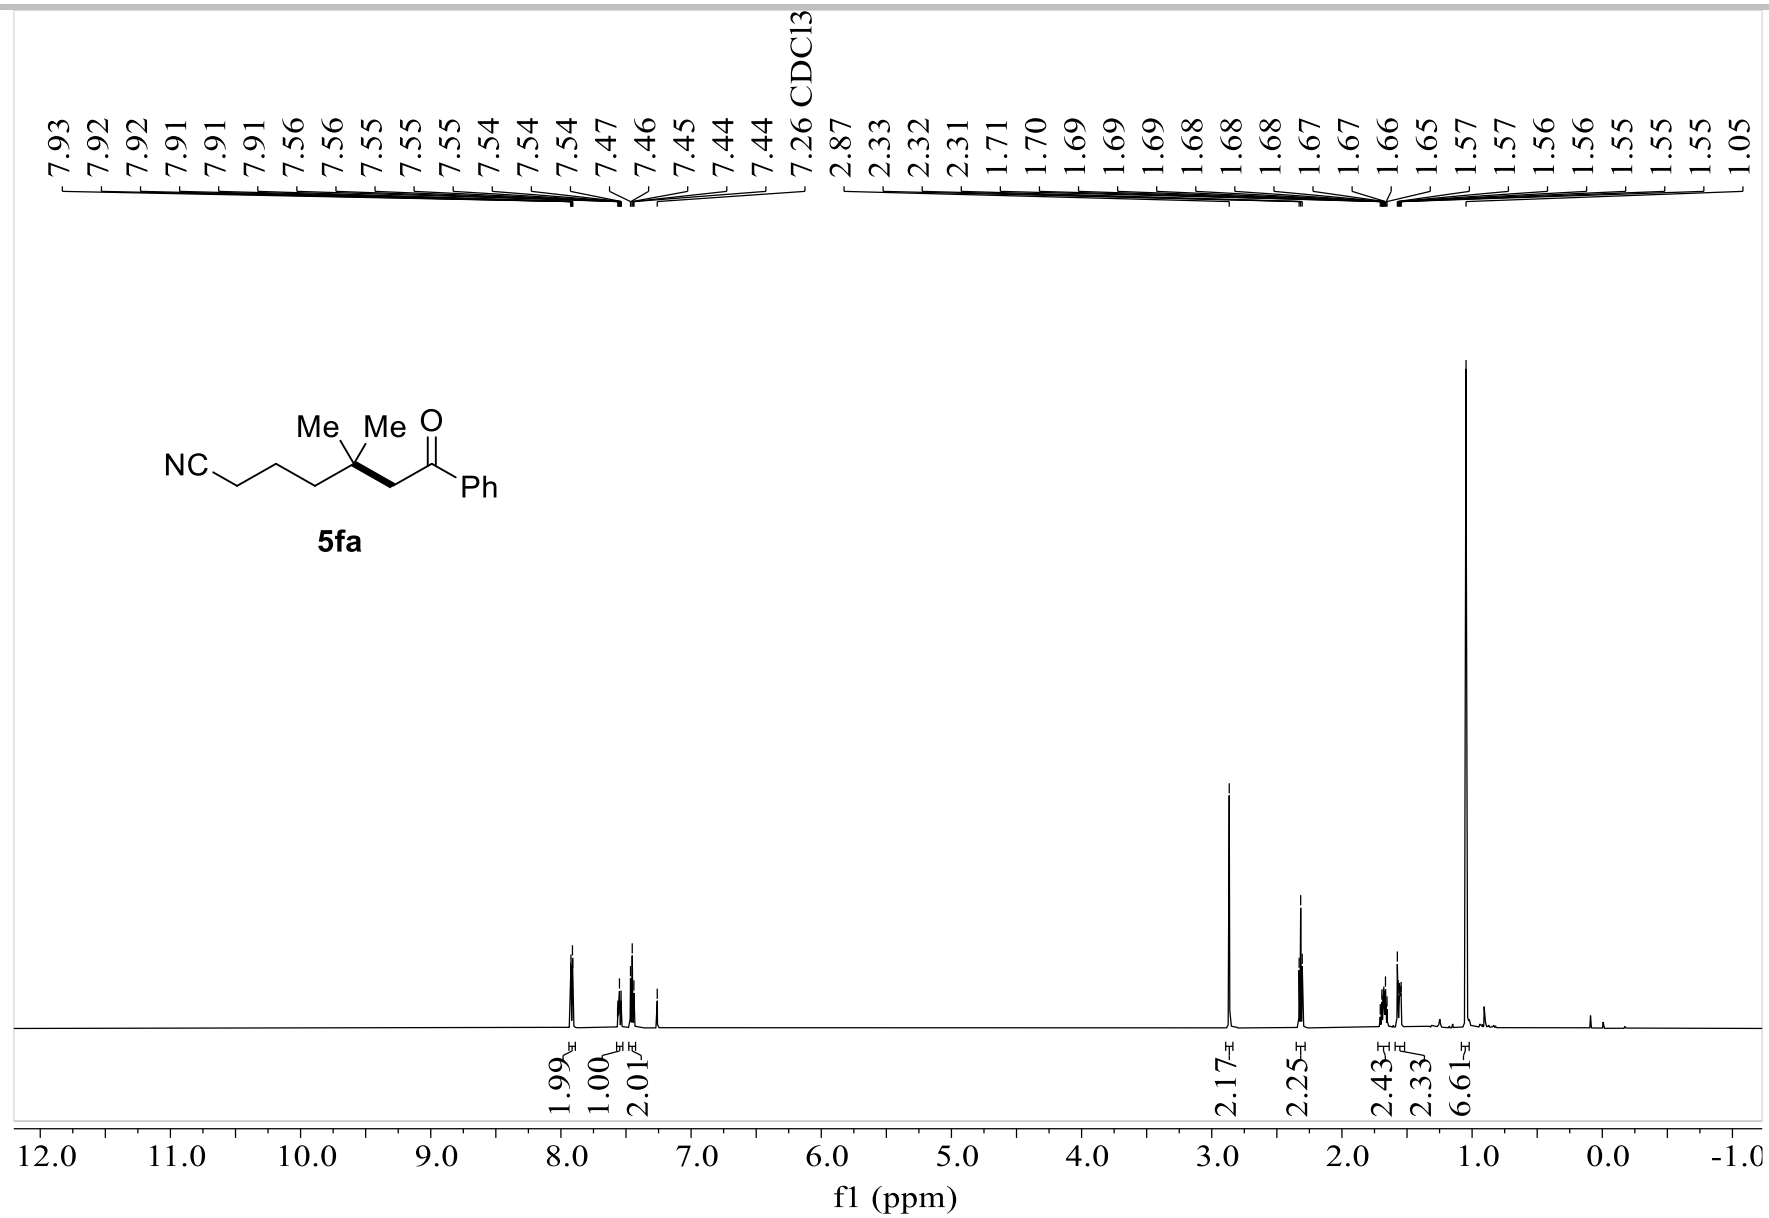

SUPPORTING INFORMATION

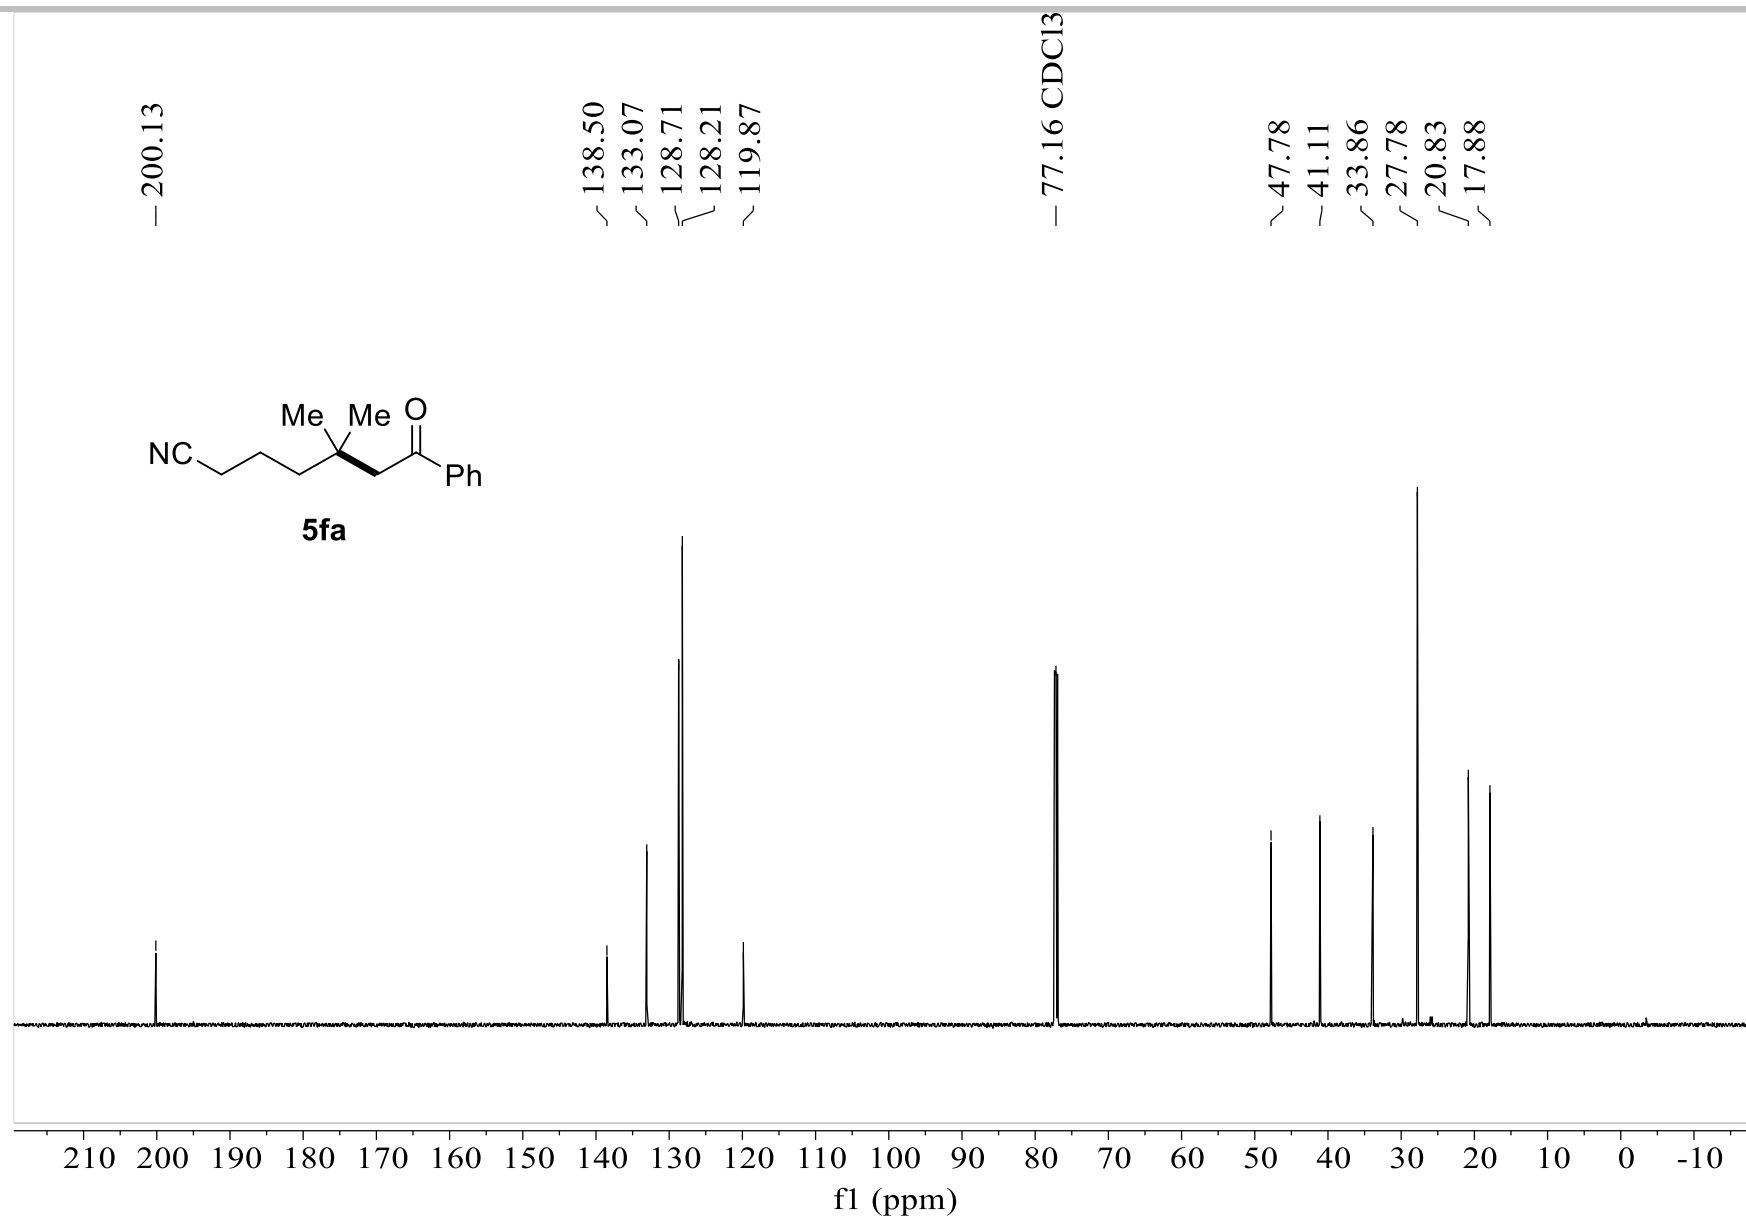

SUPPORTING INFORMATION

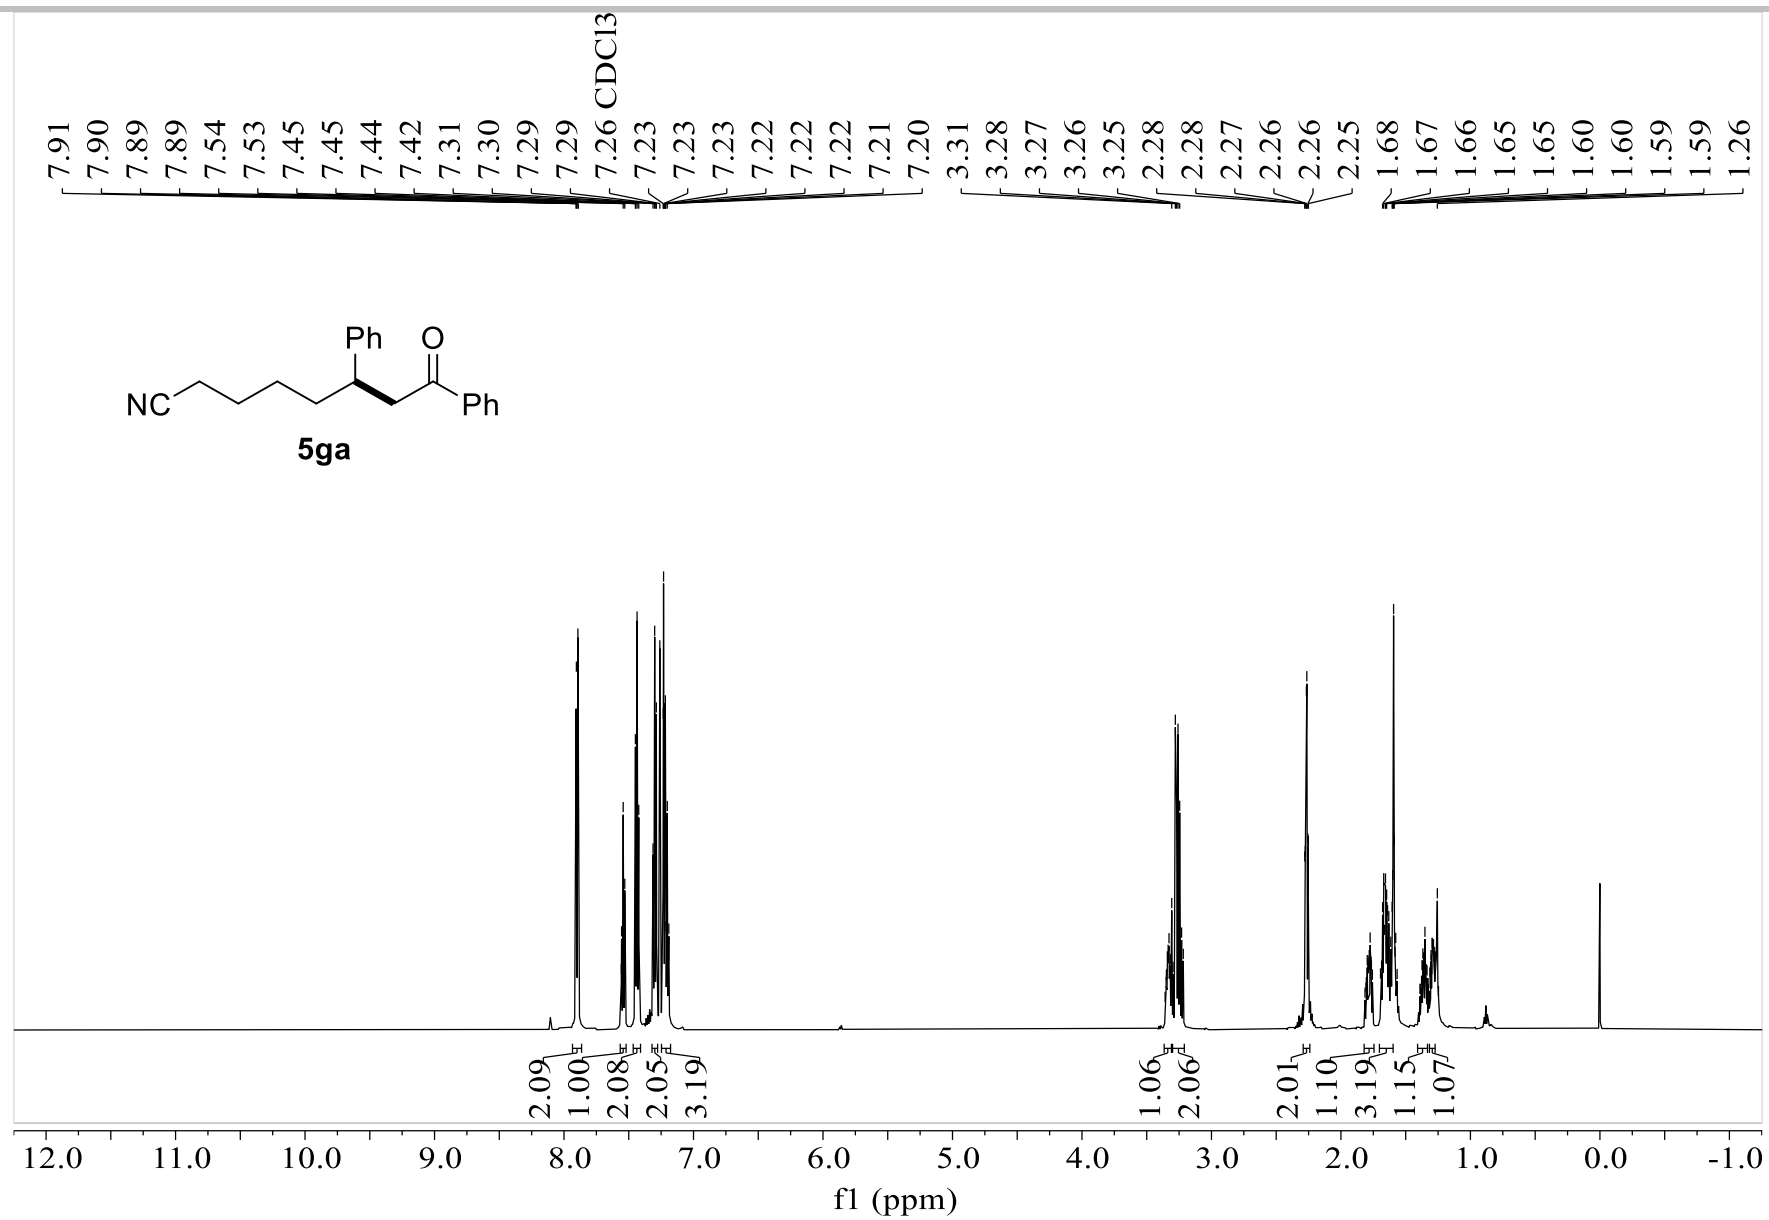

# SUPPORTING INFORMATION

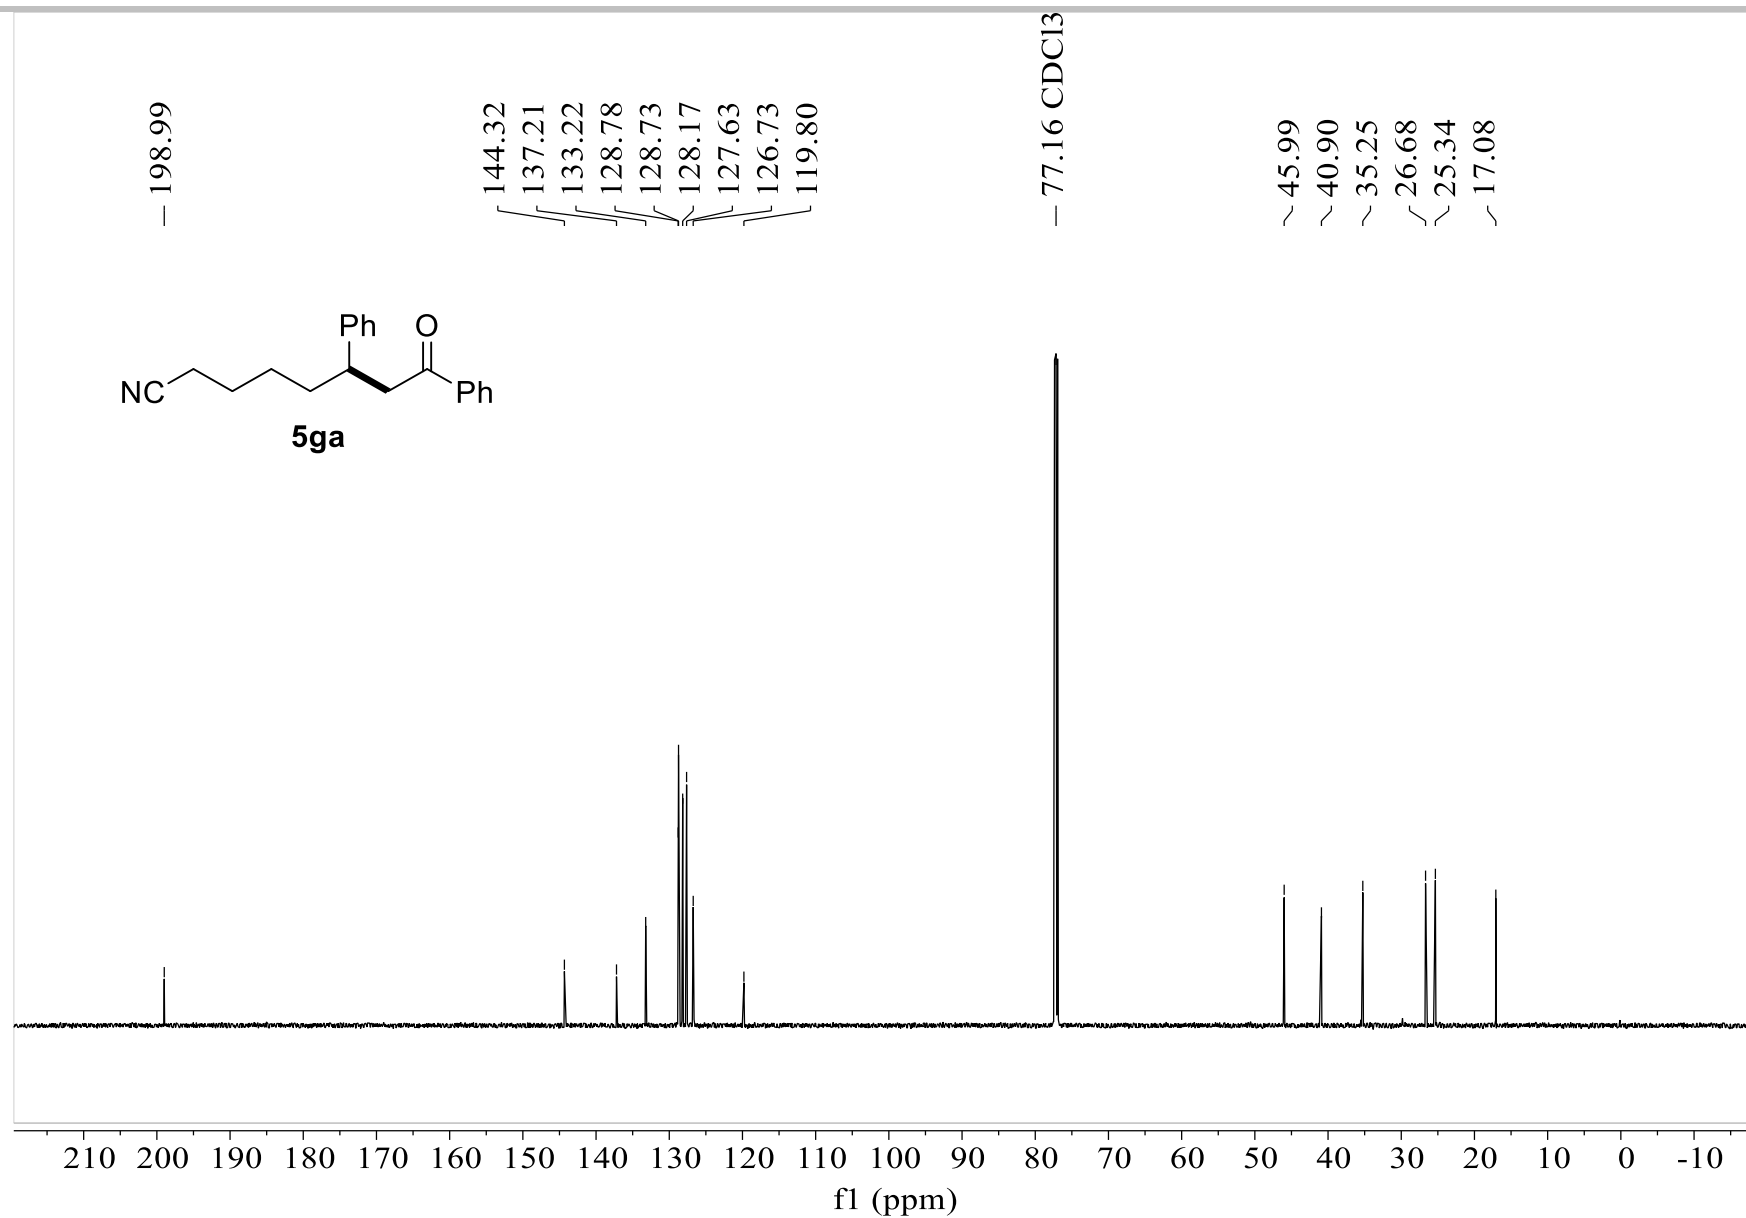

# SUPPORTING INFORMATION

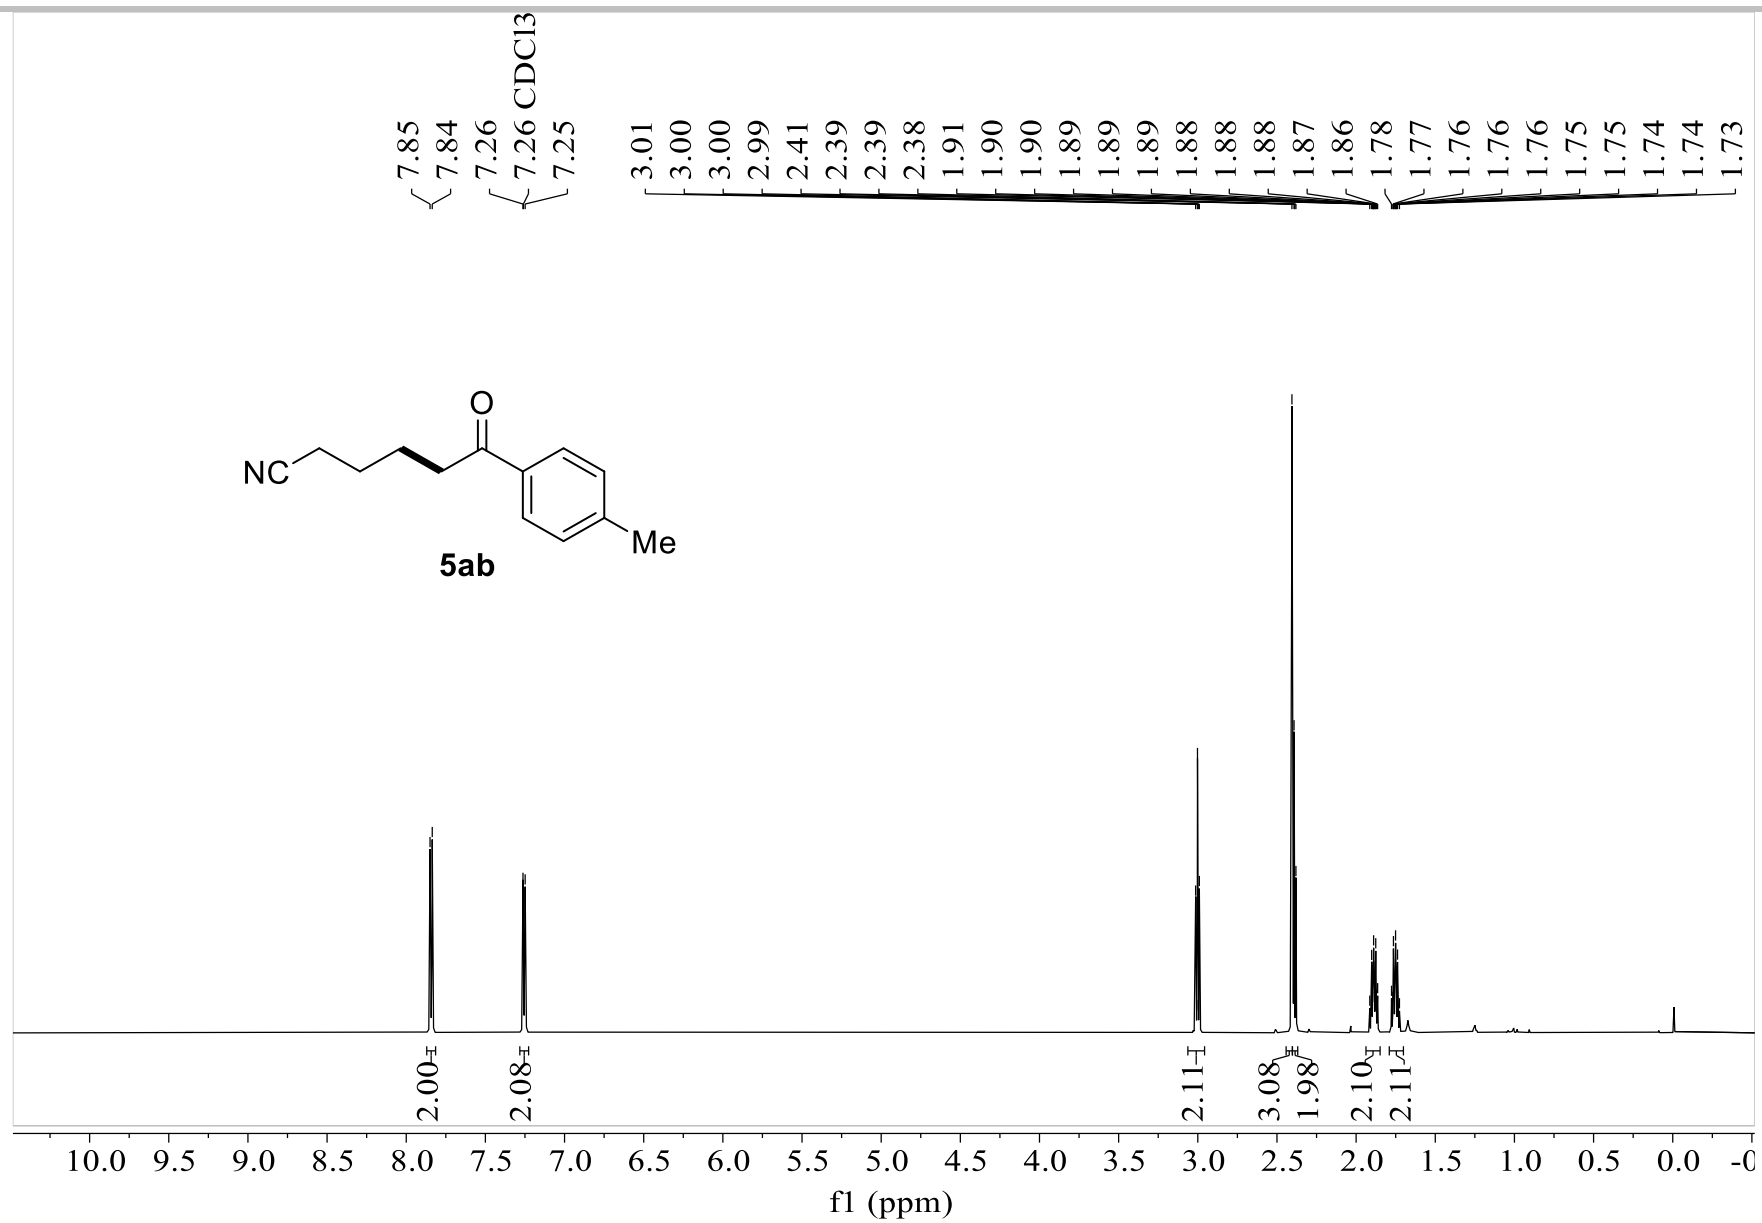



SUPPORTING INFORMATION

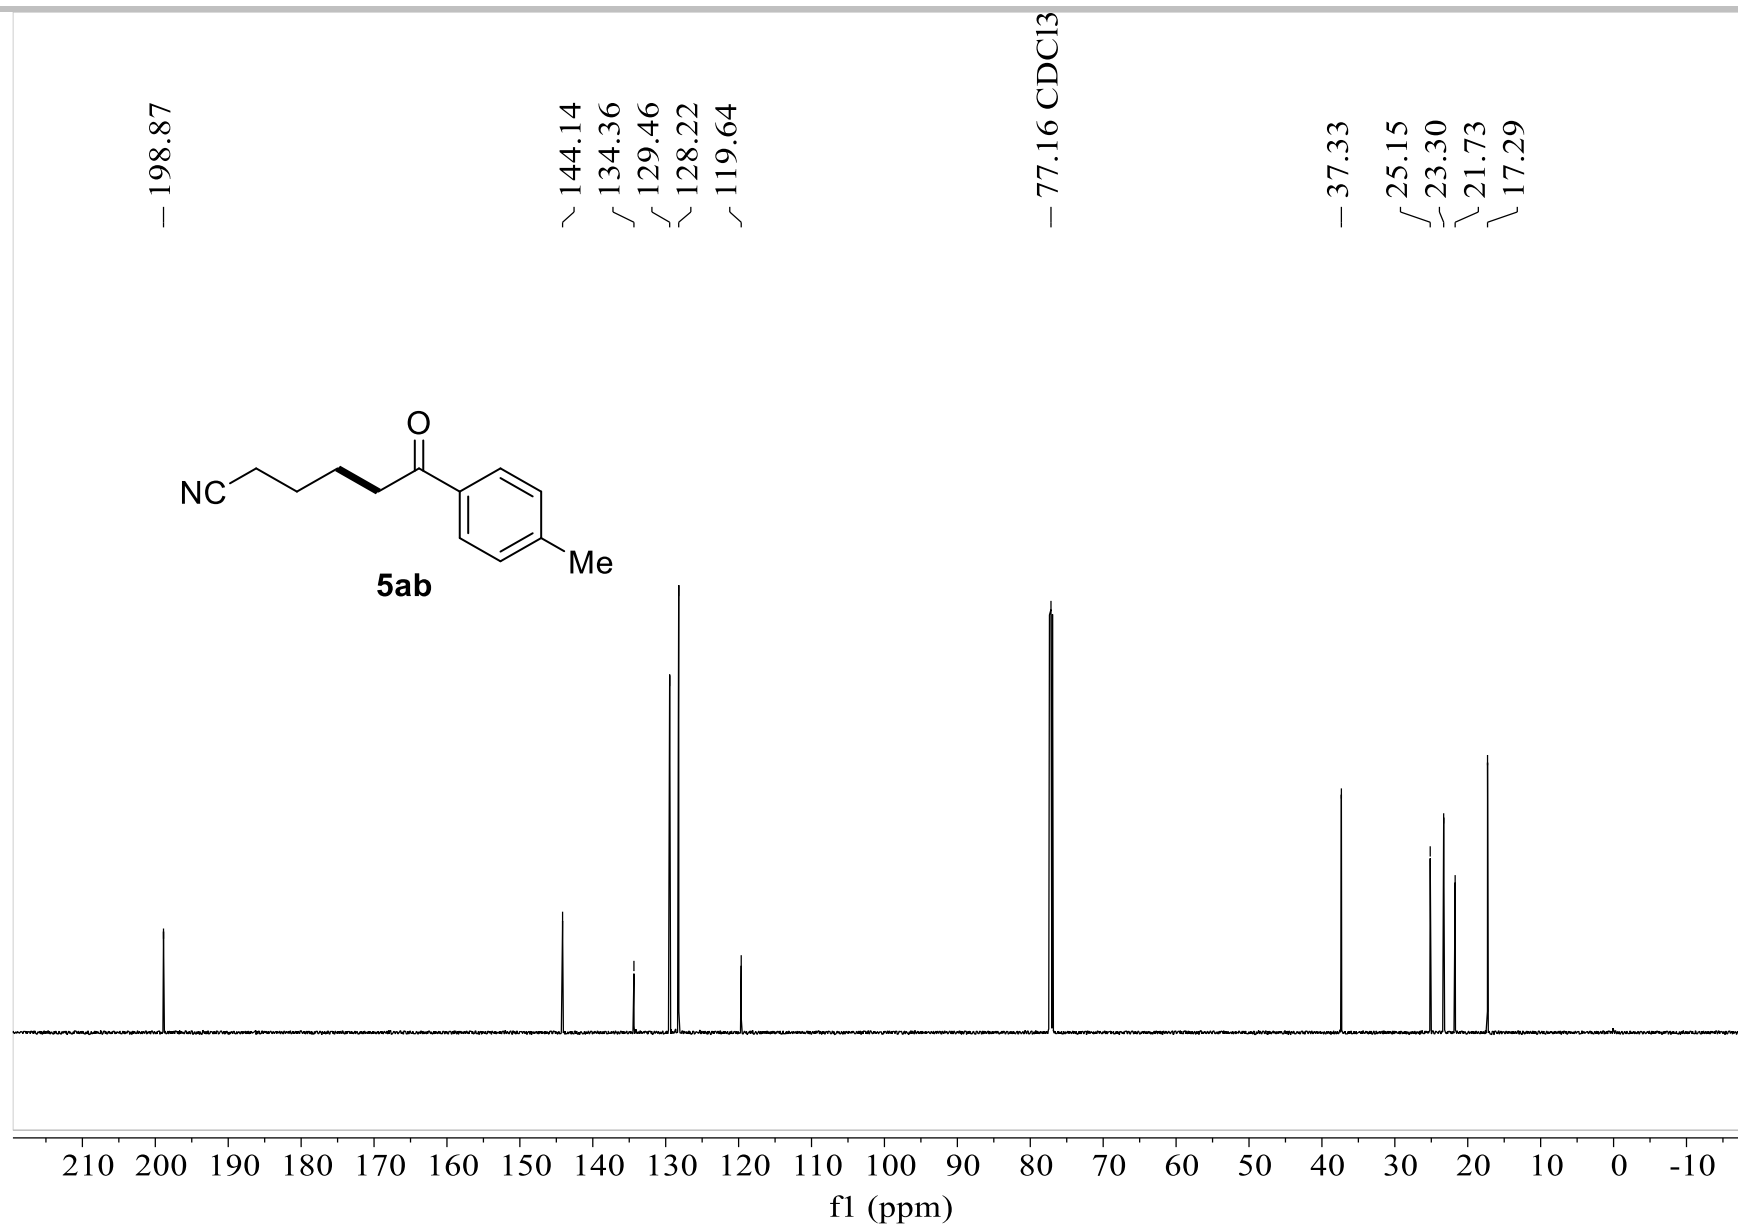

# SUPPORTING INFORMATION

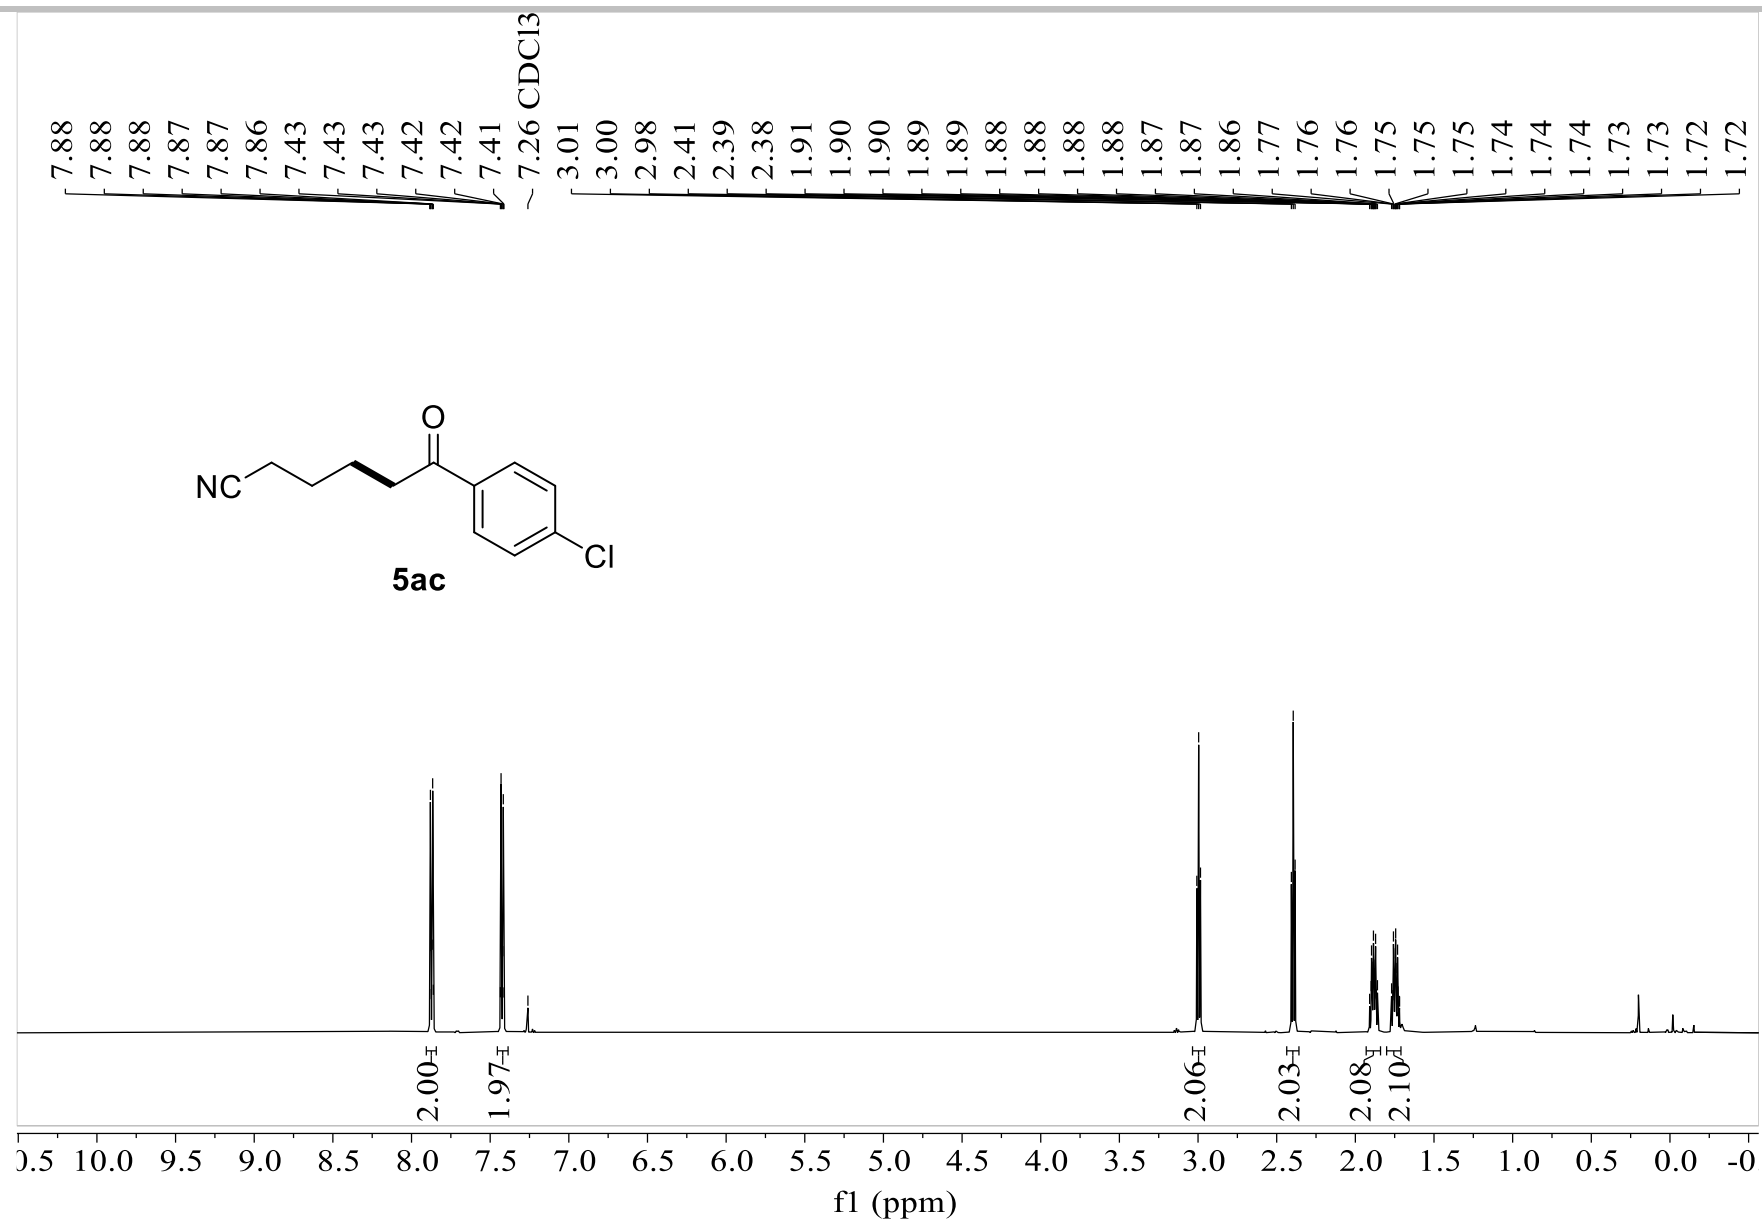

# SUPPORTING INFORMATION

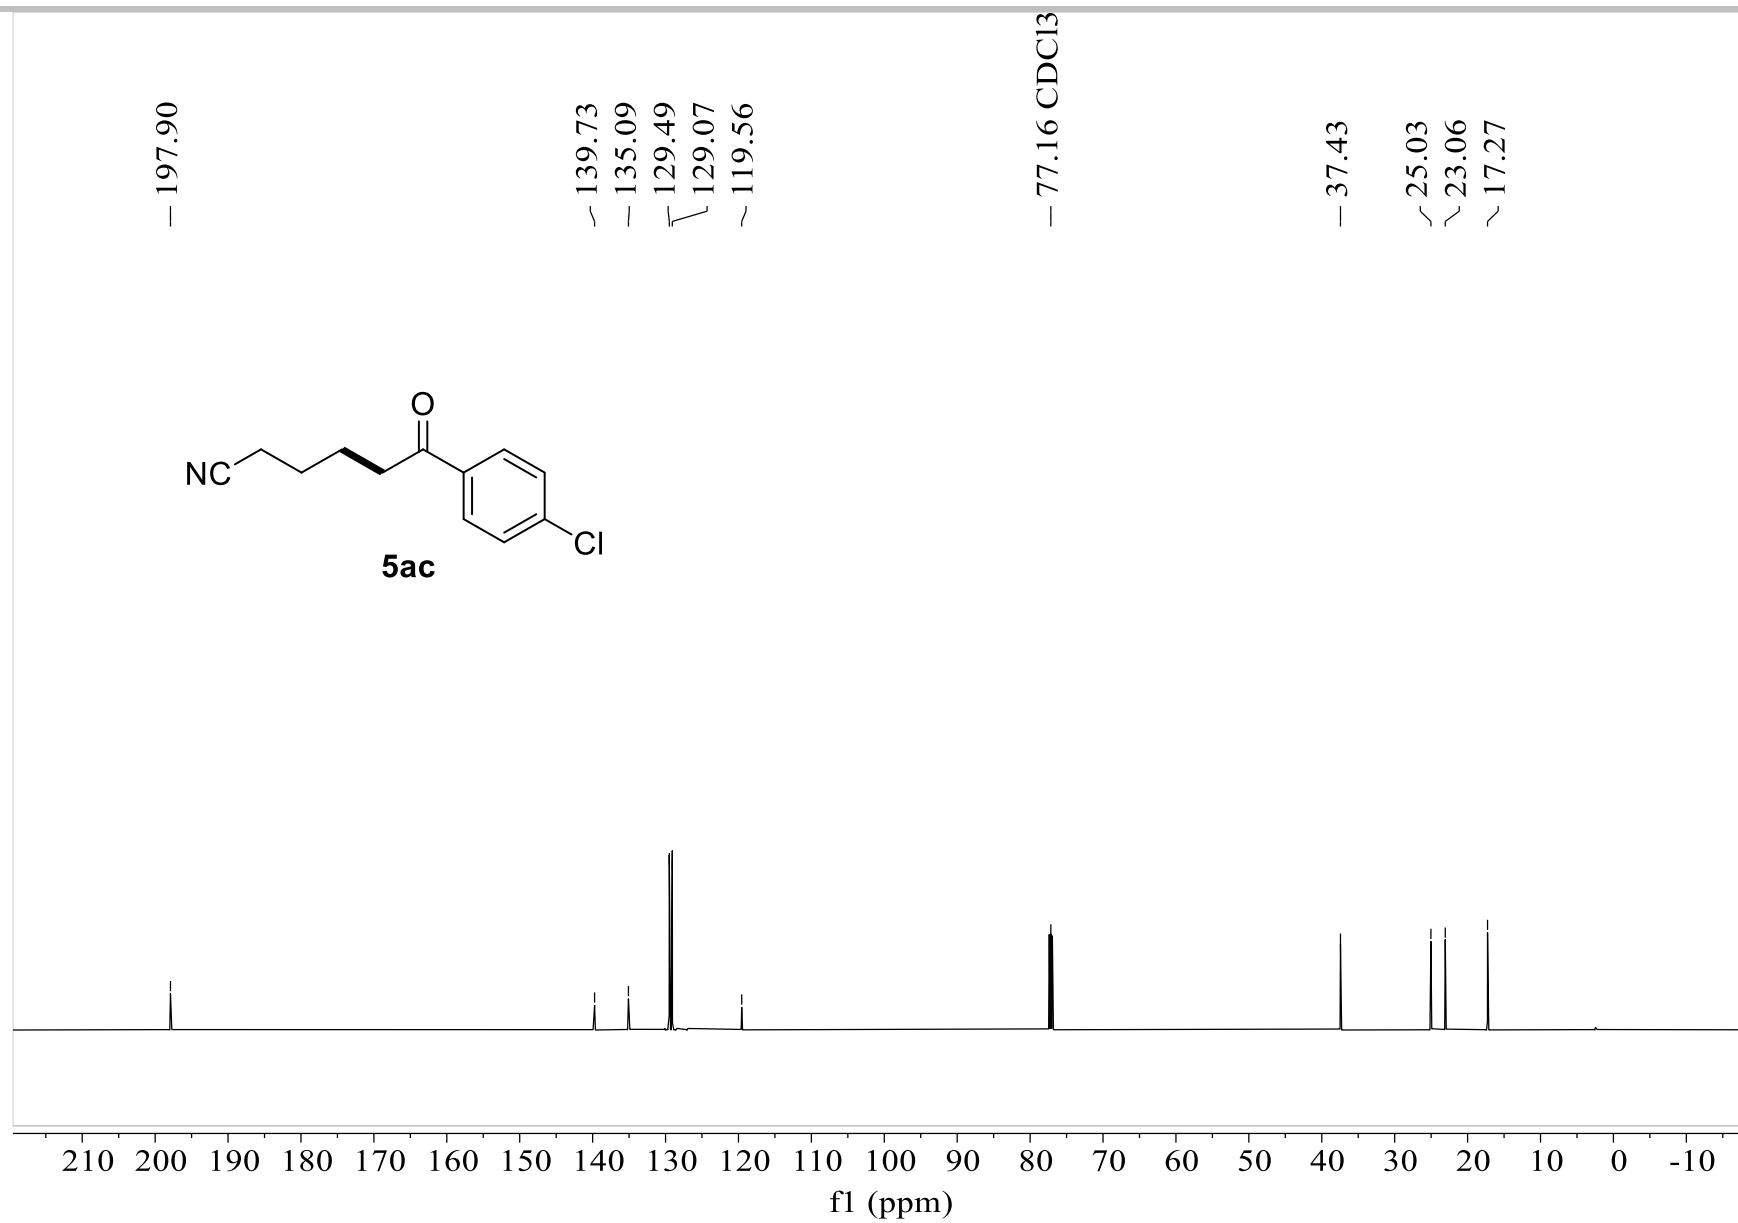

SUPPORTING INFORMATION

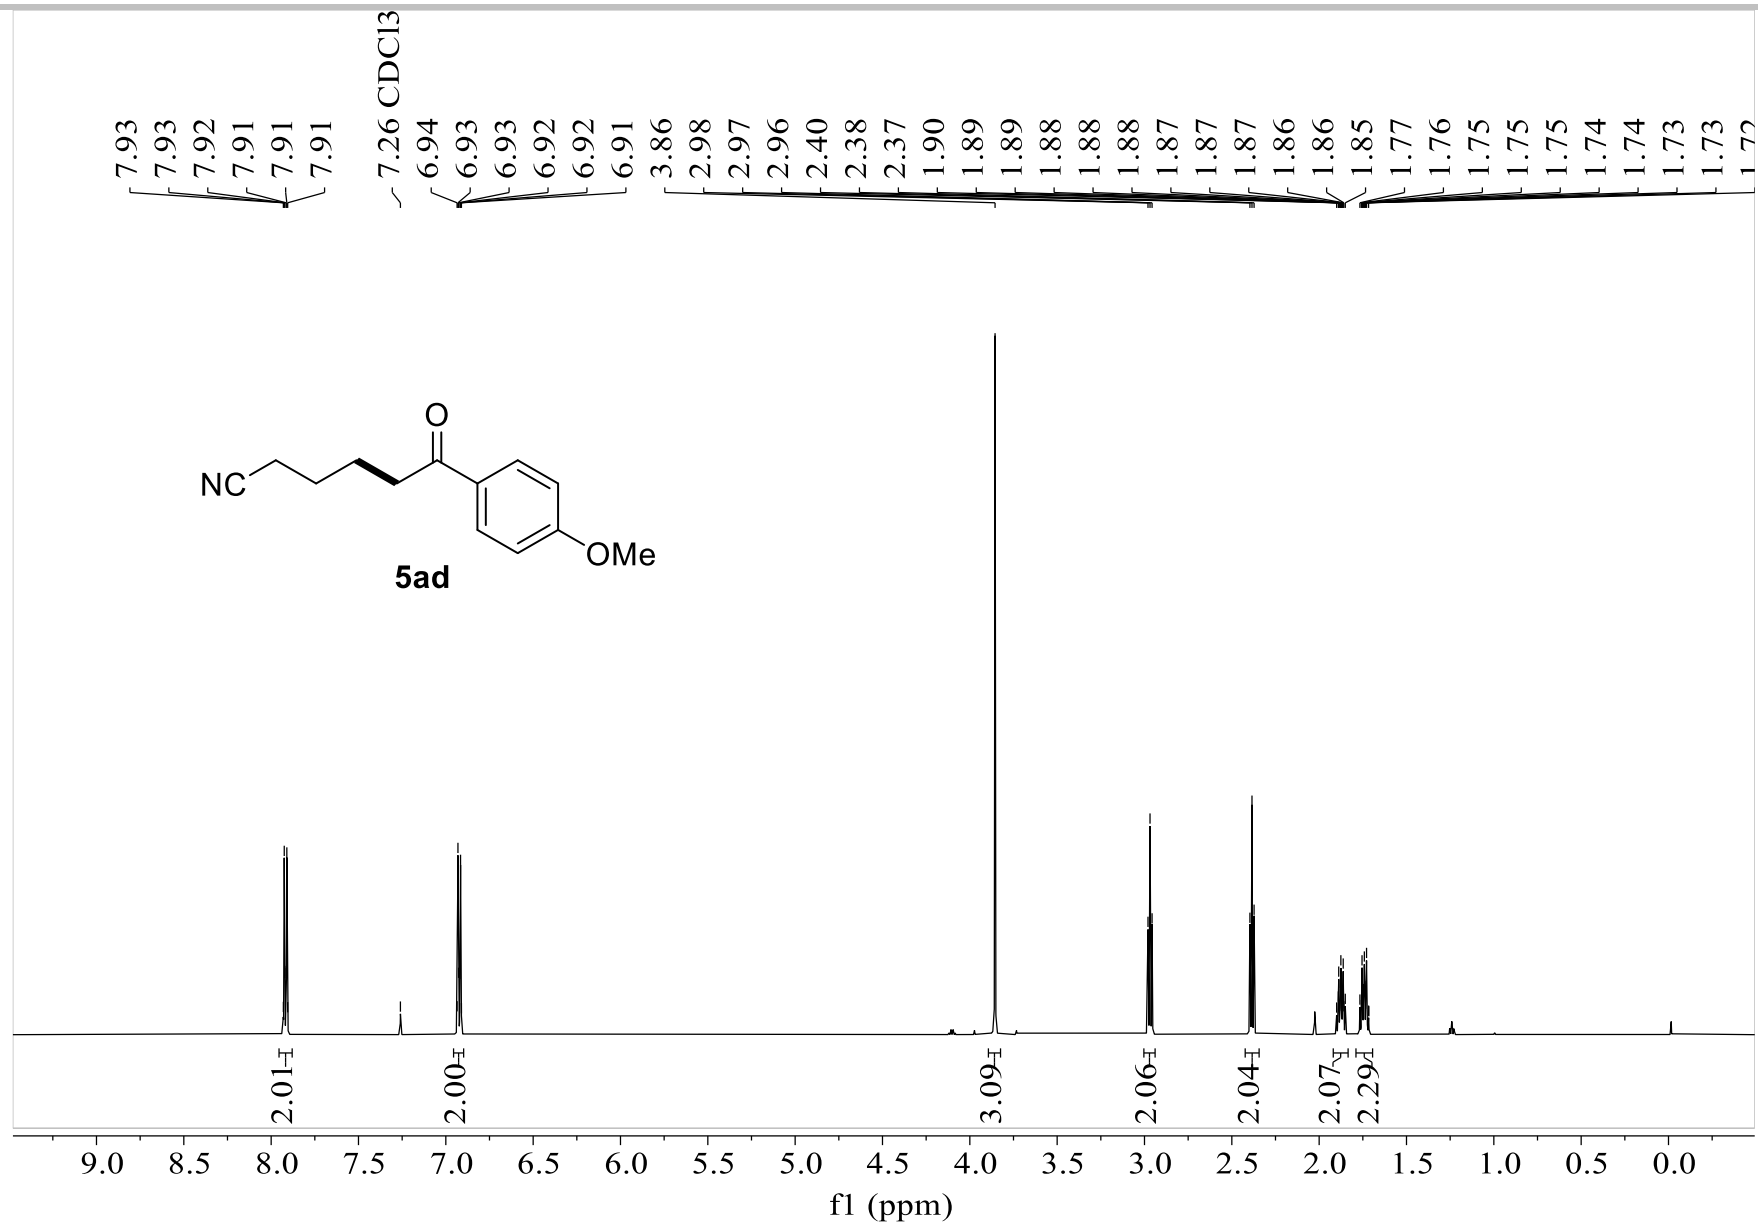

SUPPORTING INFORMATION

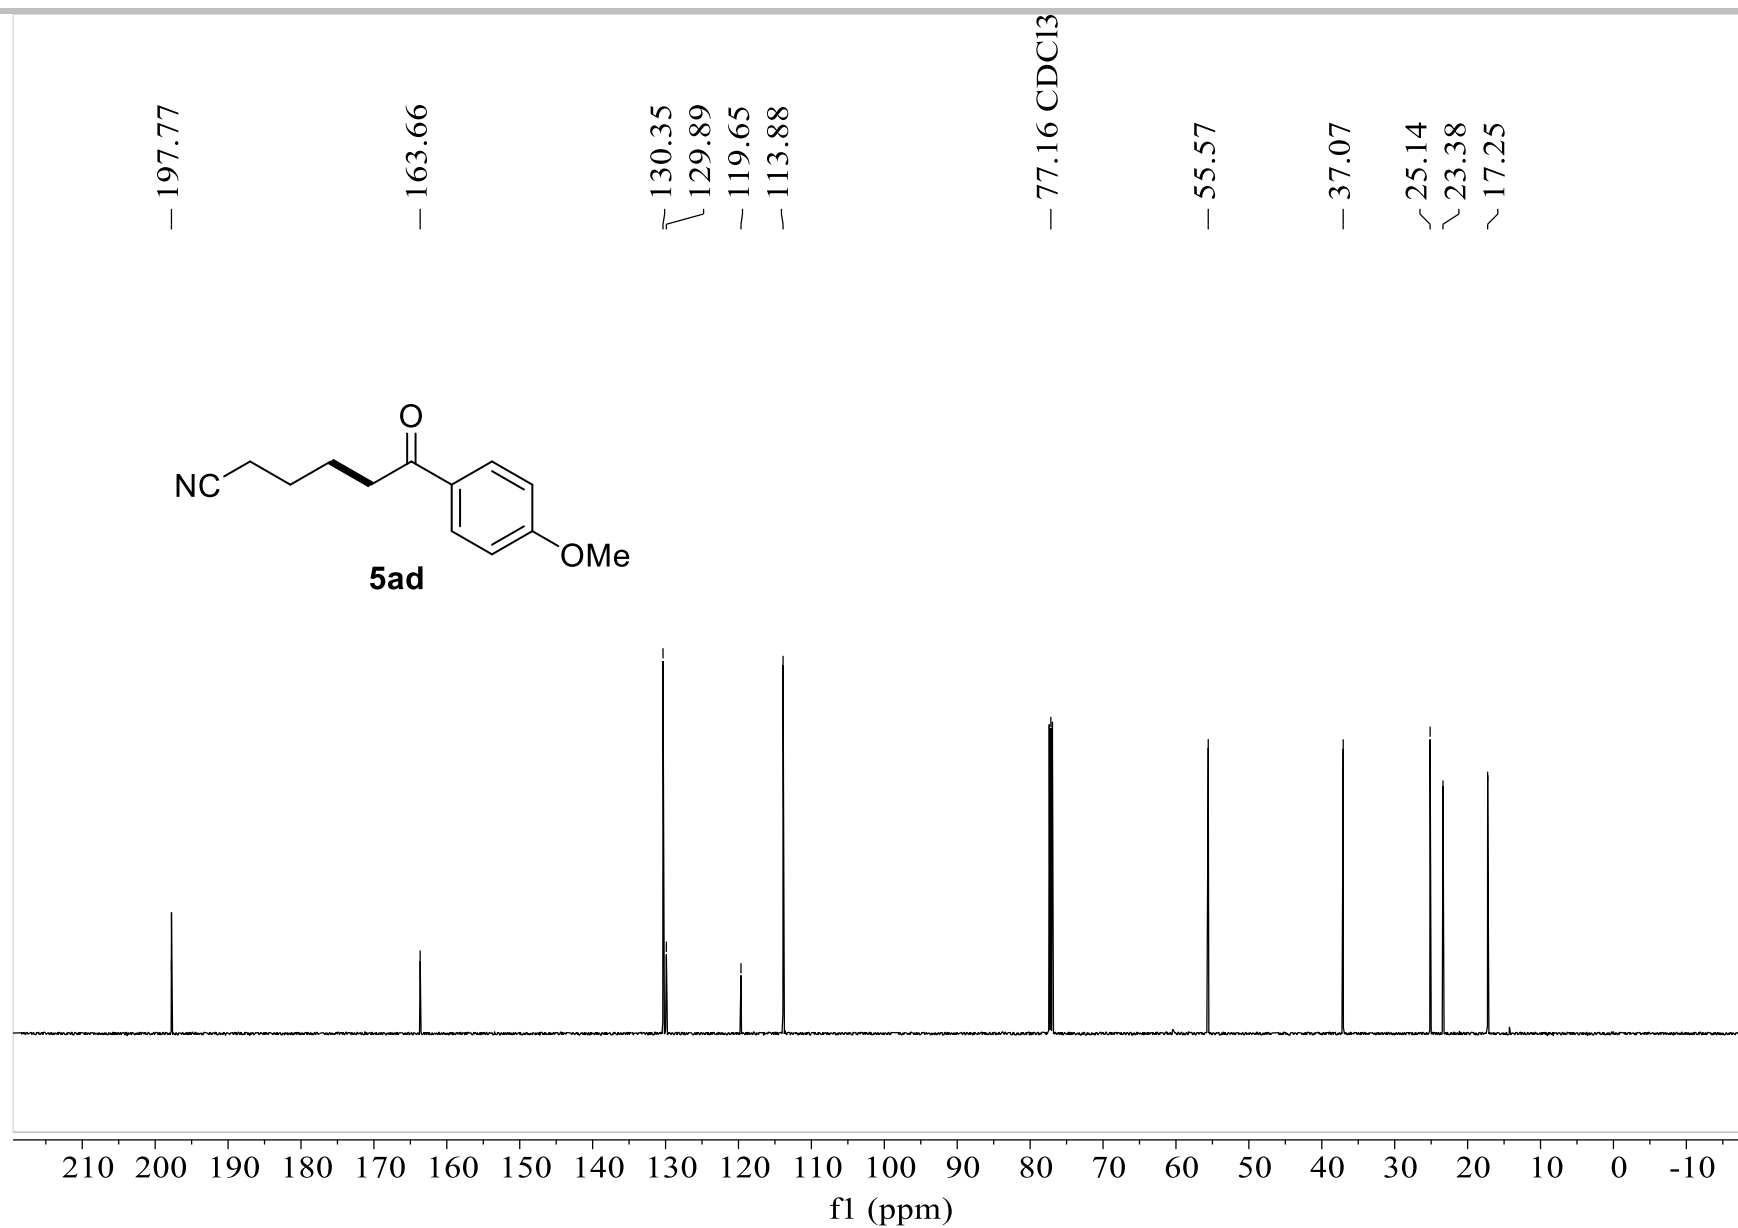

SUPPORTING INFORMATION

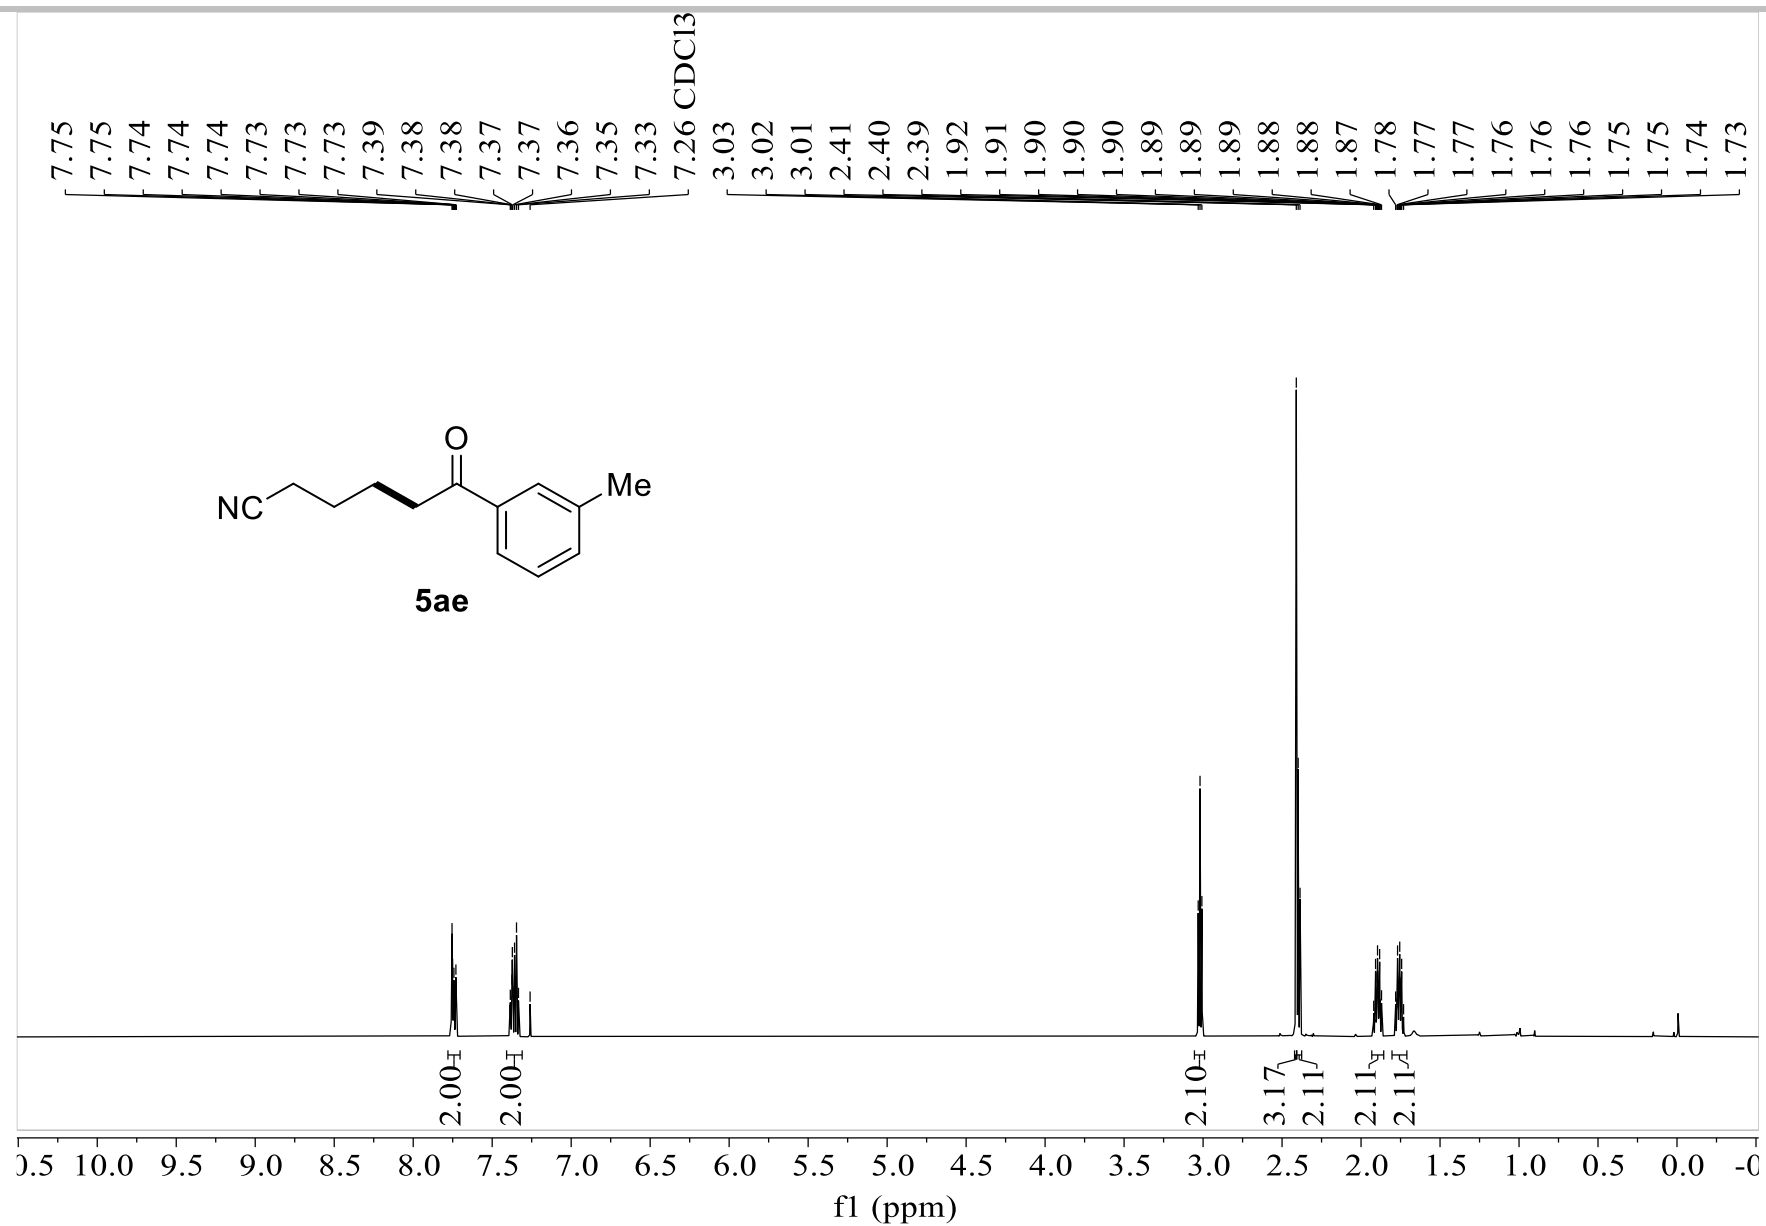

SUPPORTING INFORMATION

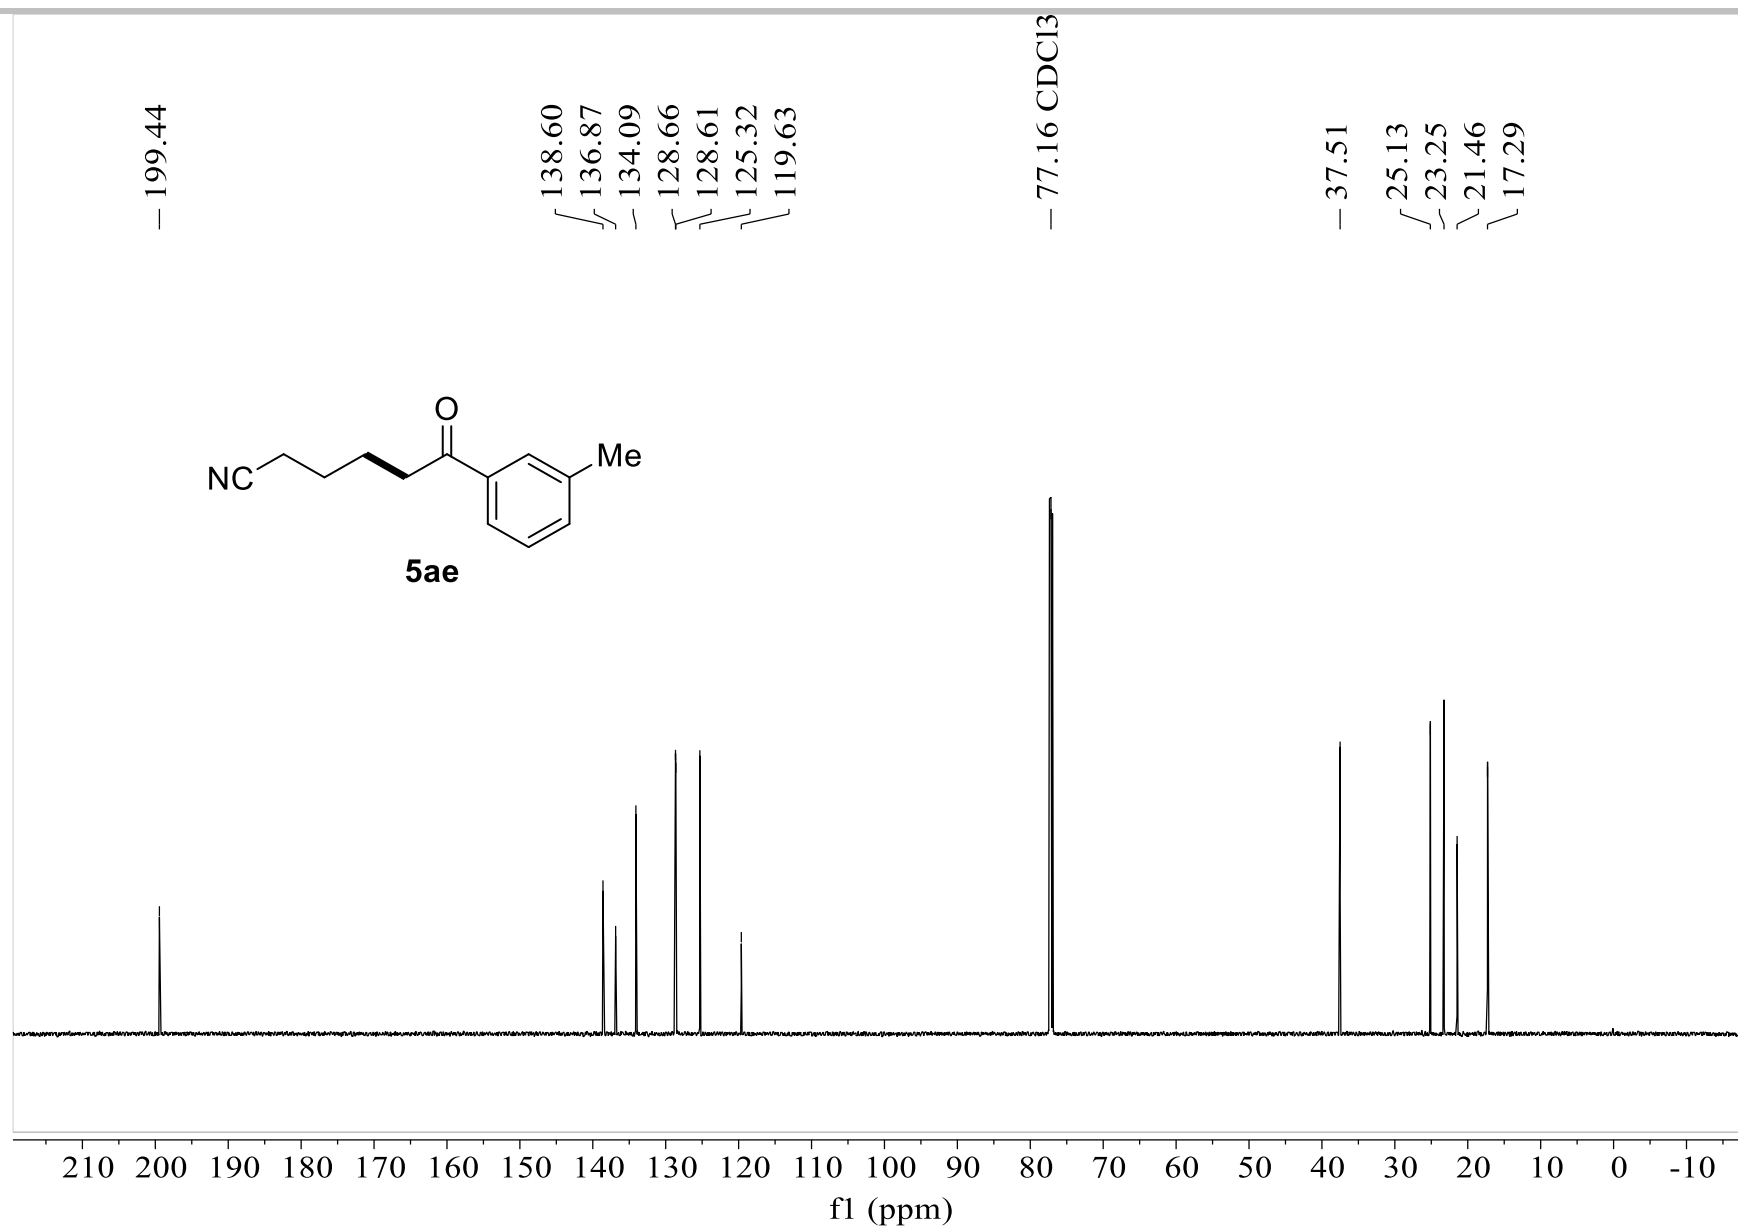

SUPPORTING INFORMATION

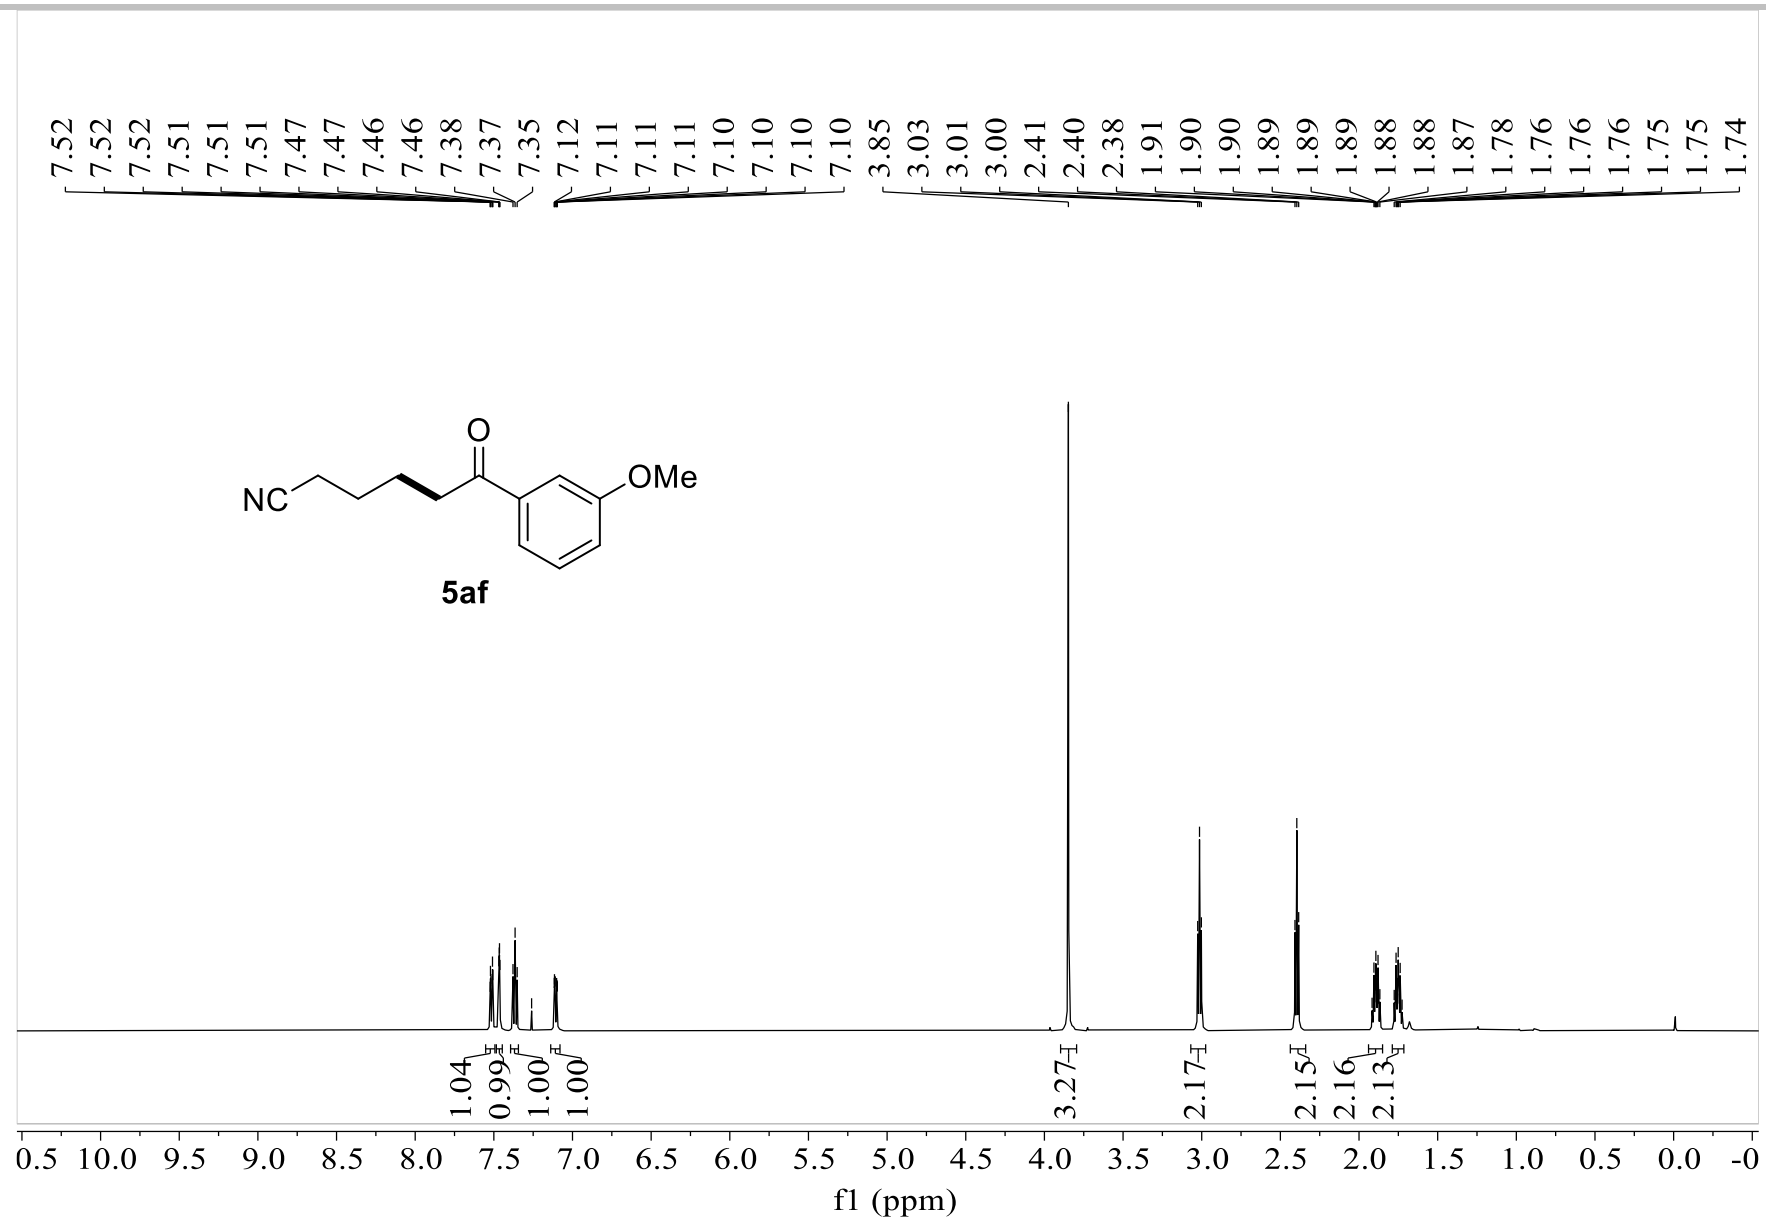



SUPPORTING INFORMATION

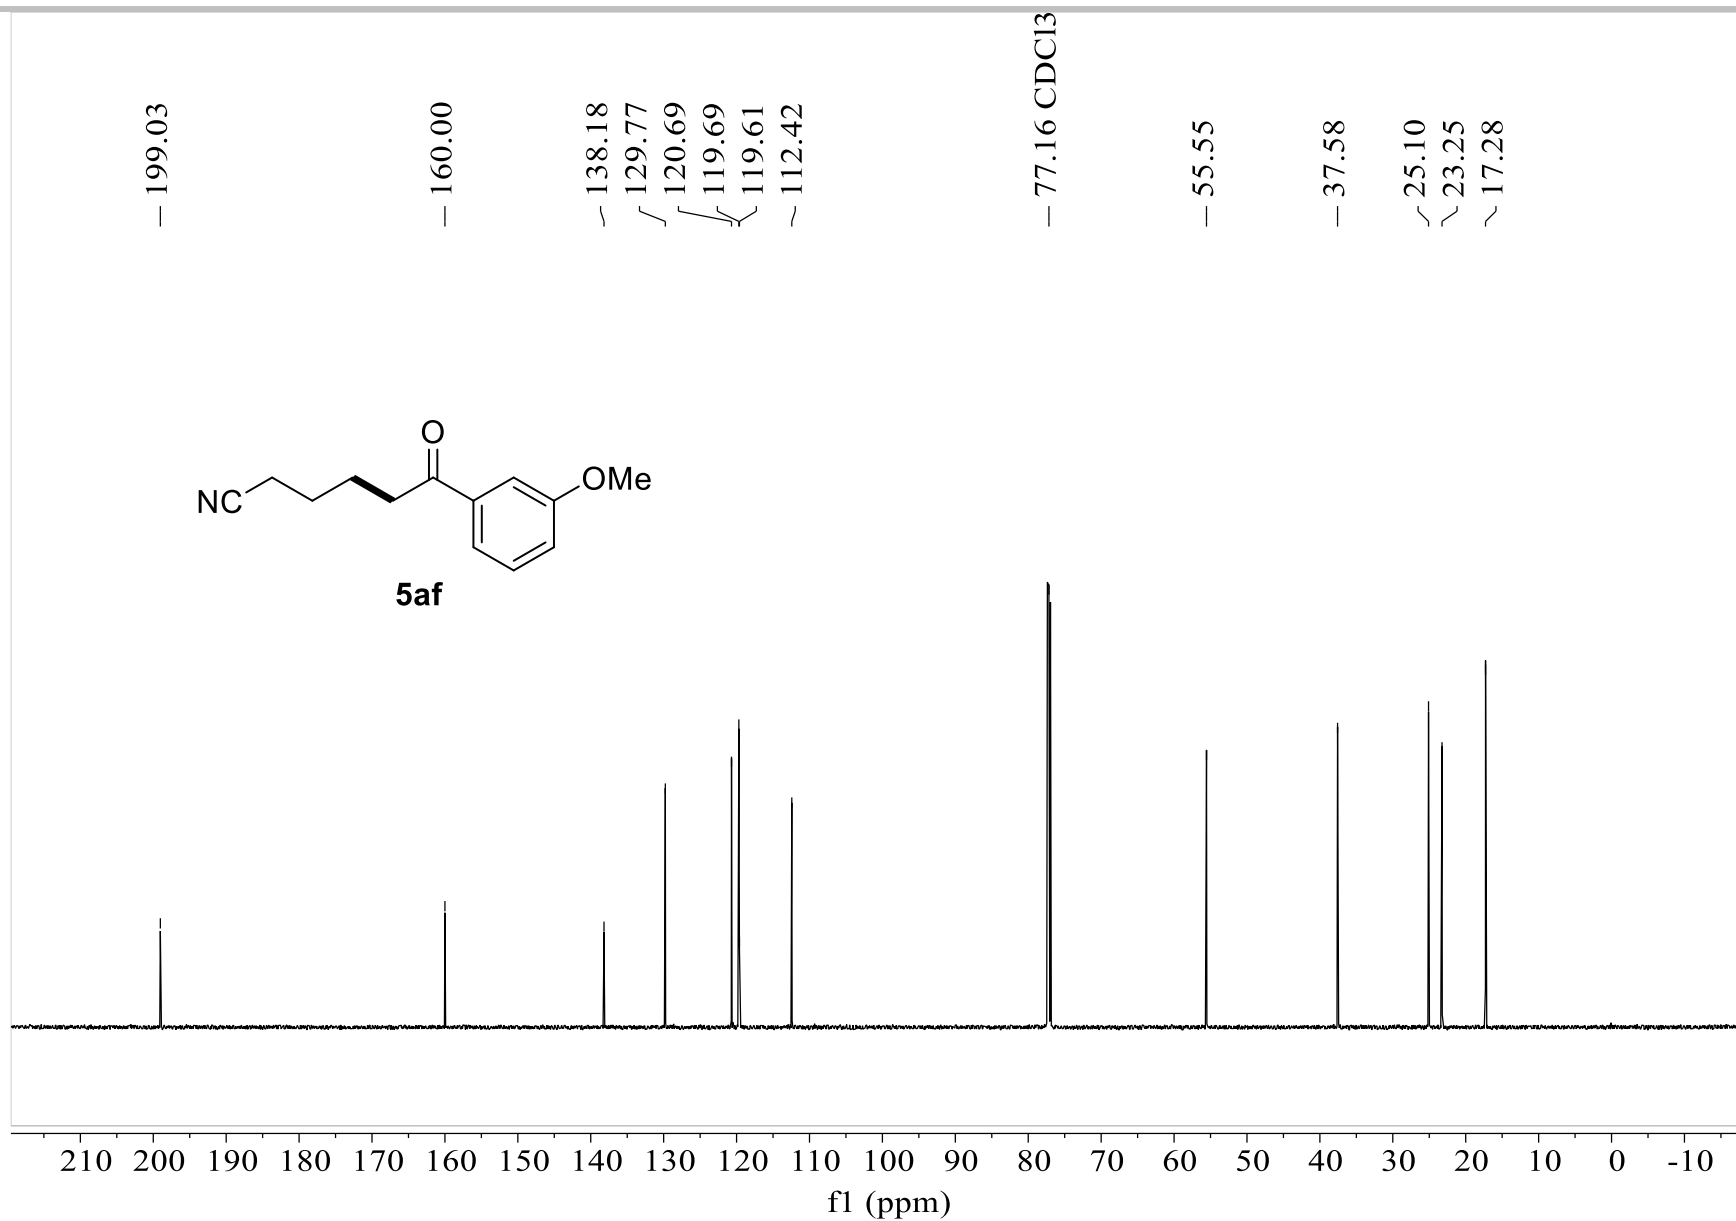

SUPPORTING INFORMATION

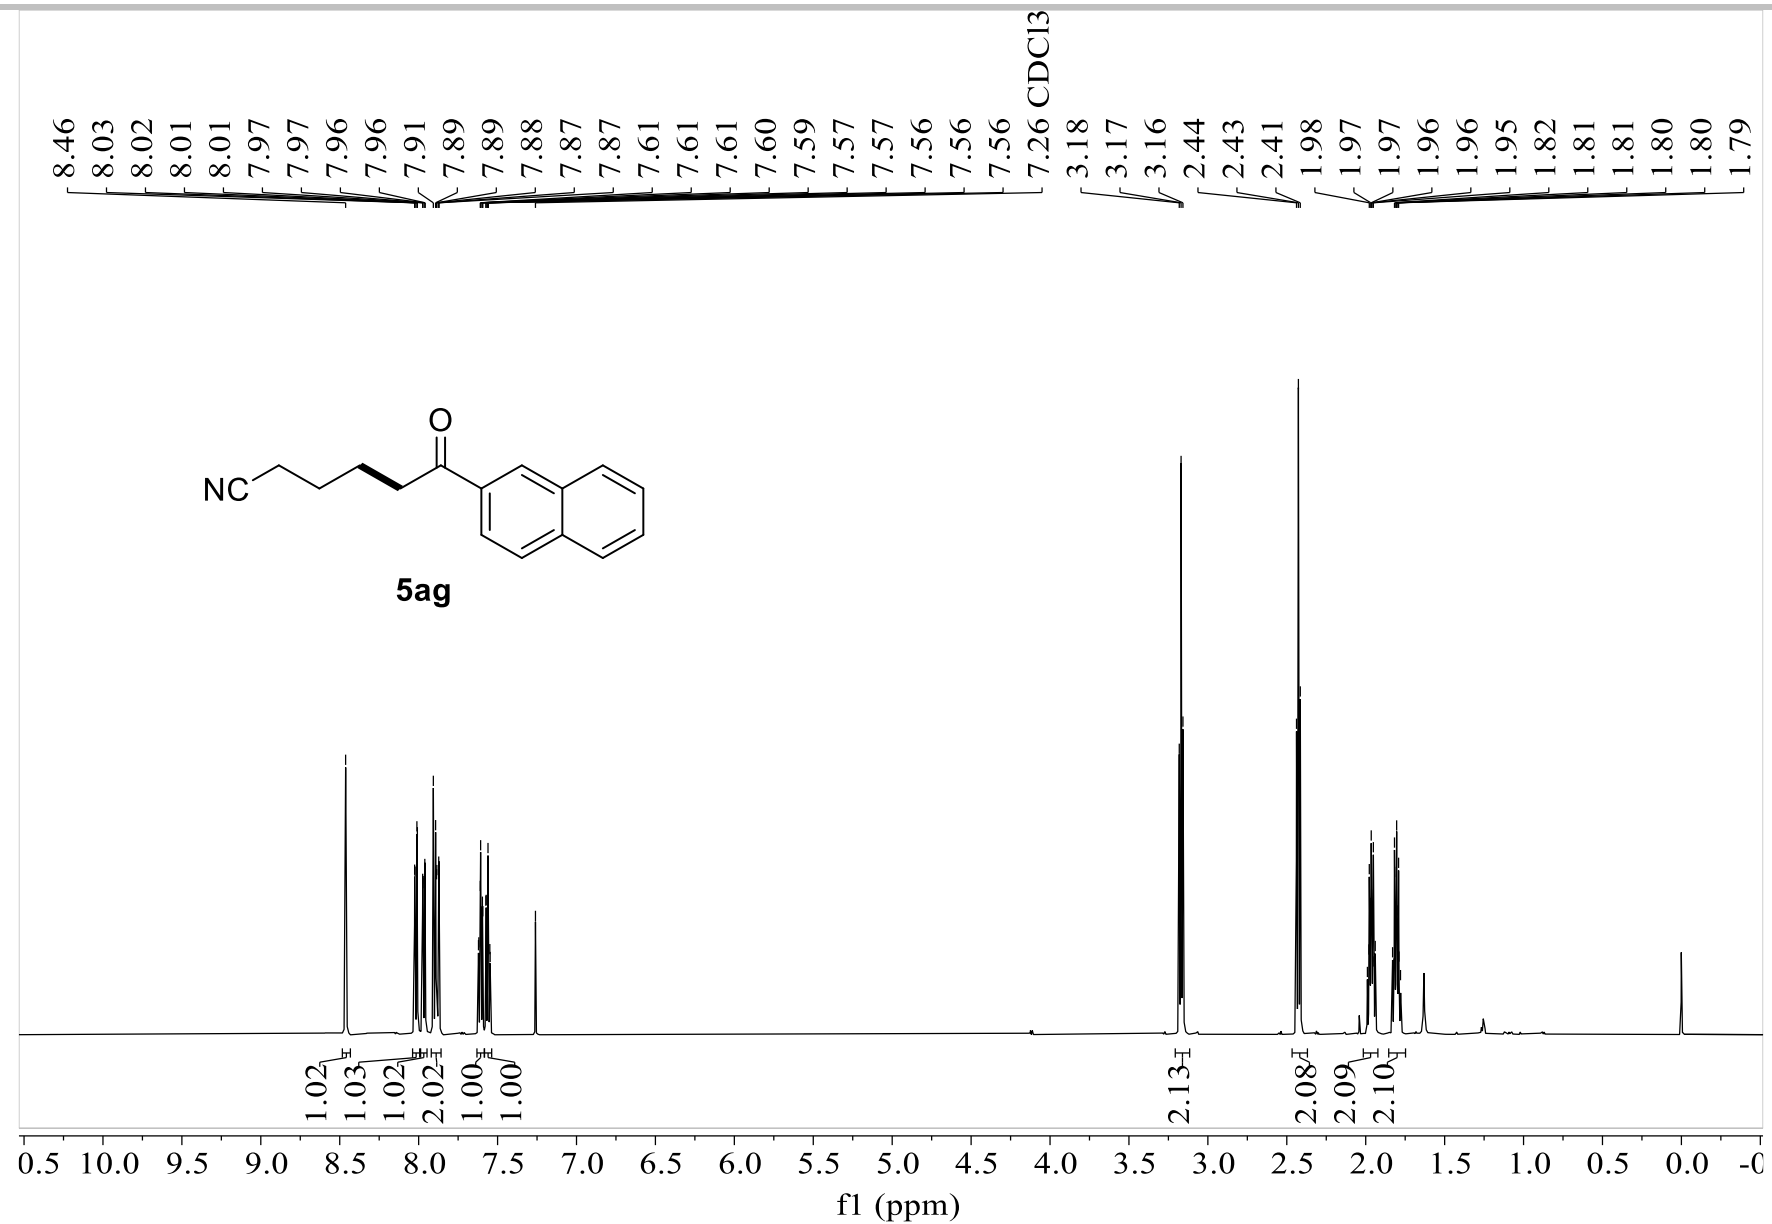

SUPPORTING INFORMATION

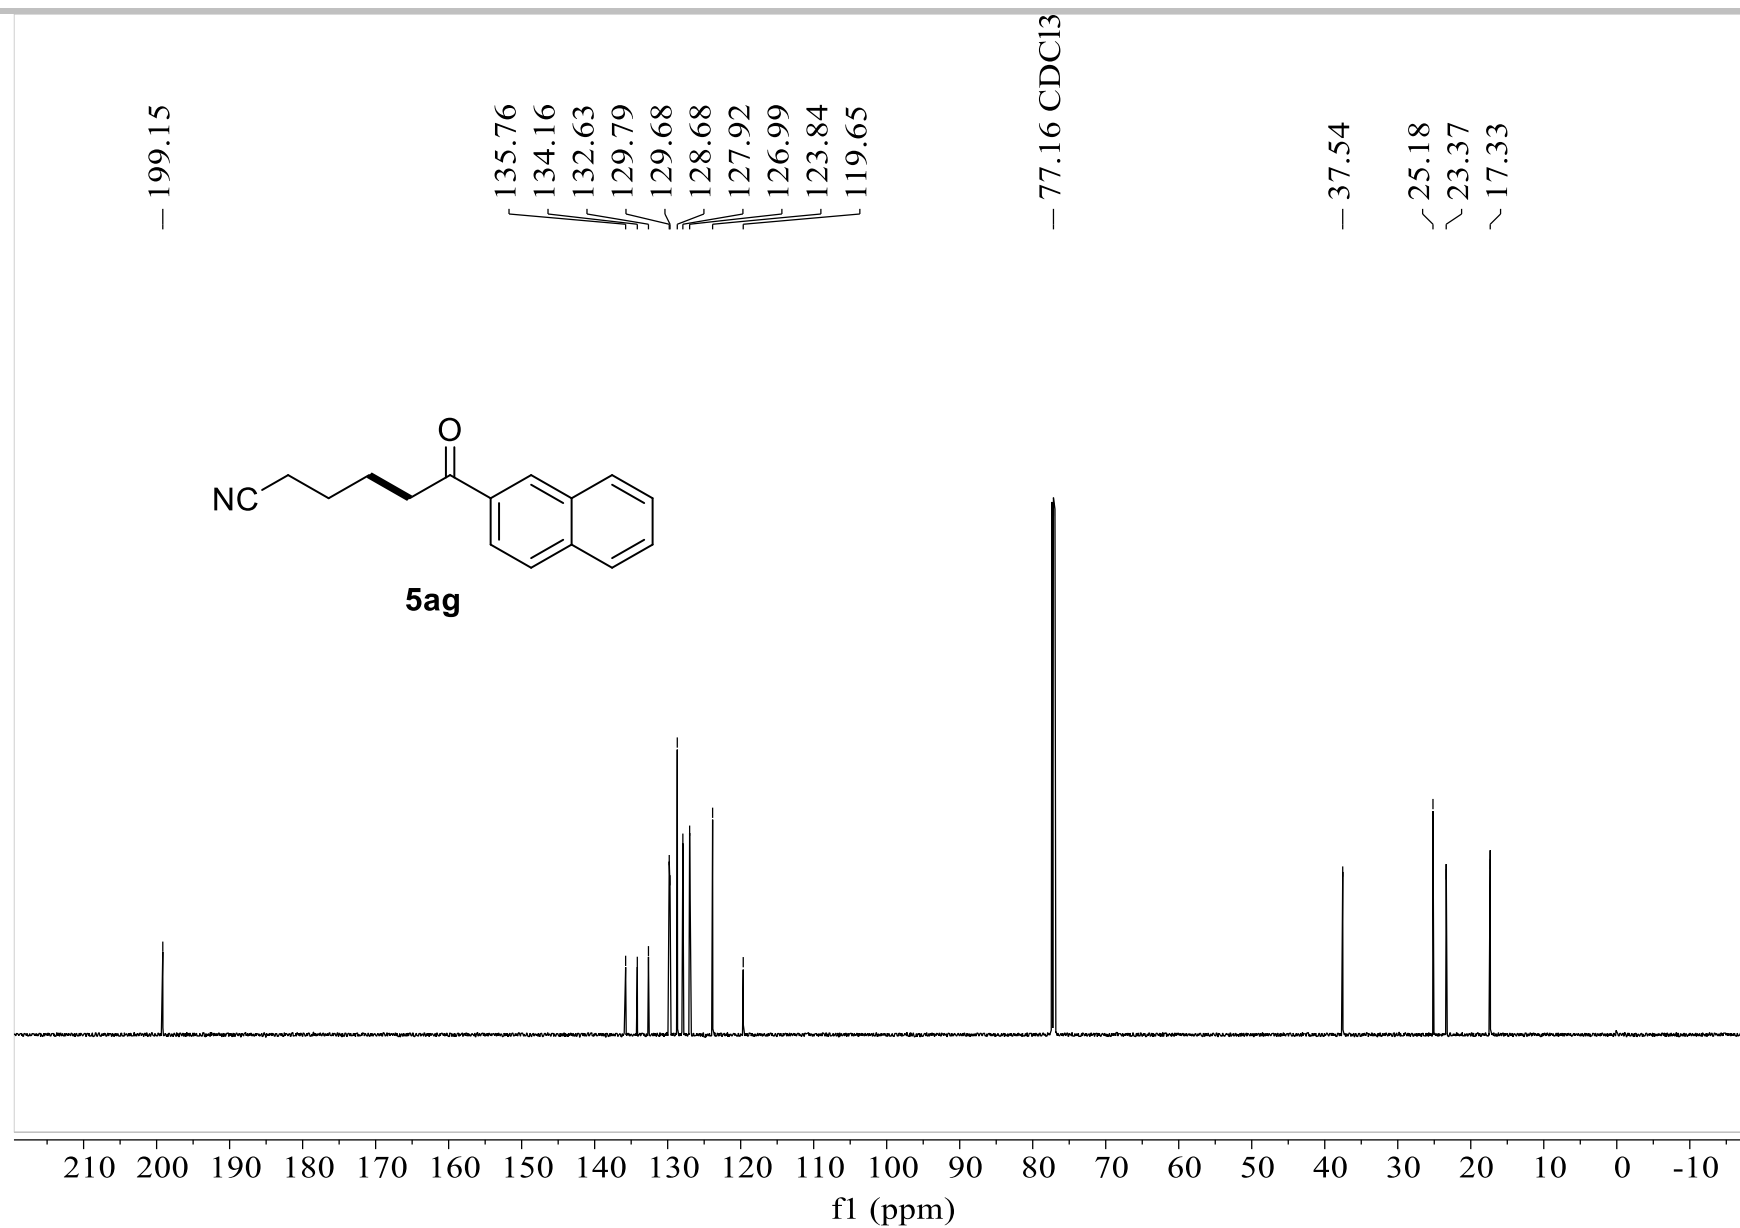

SUPPORTING INFORMATION

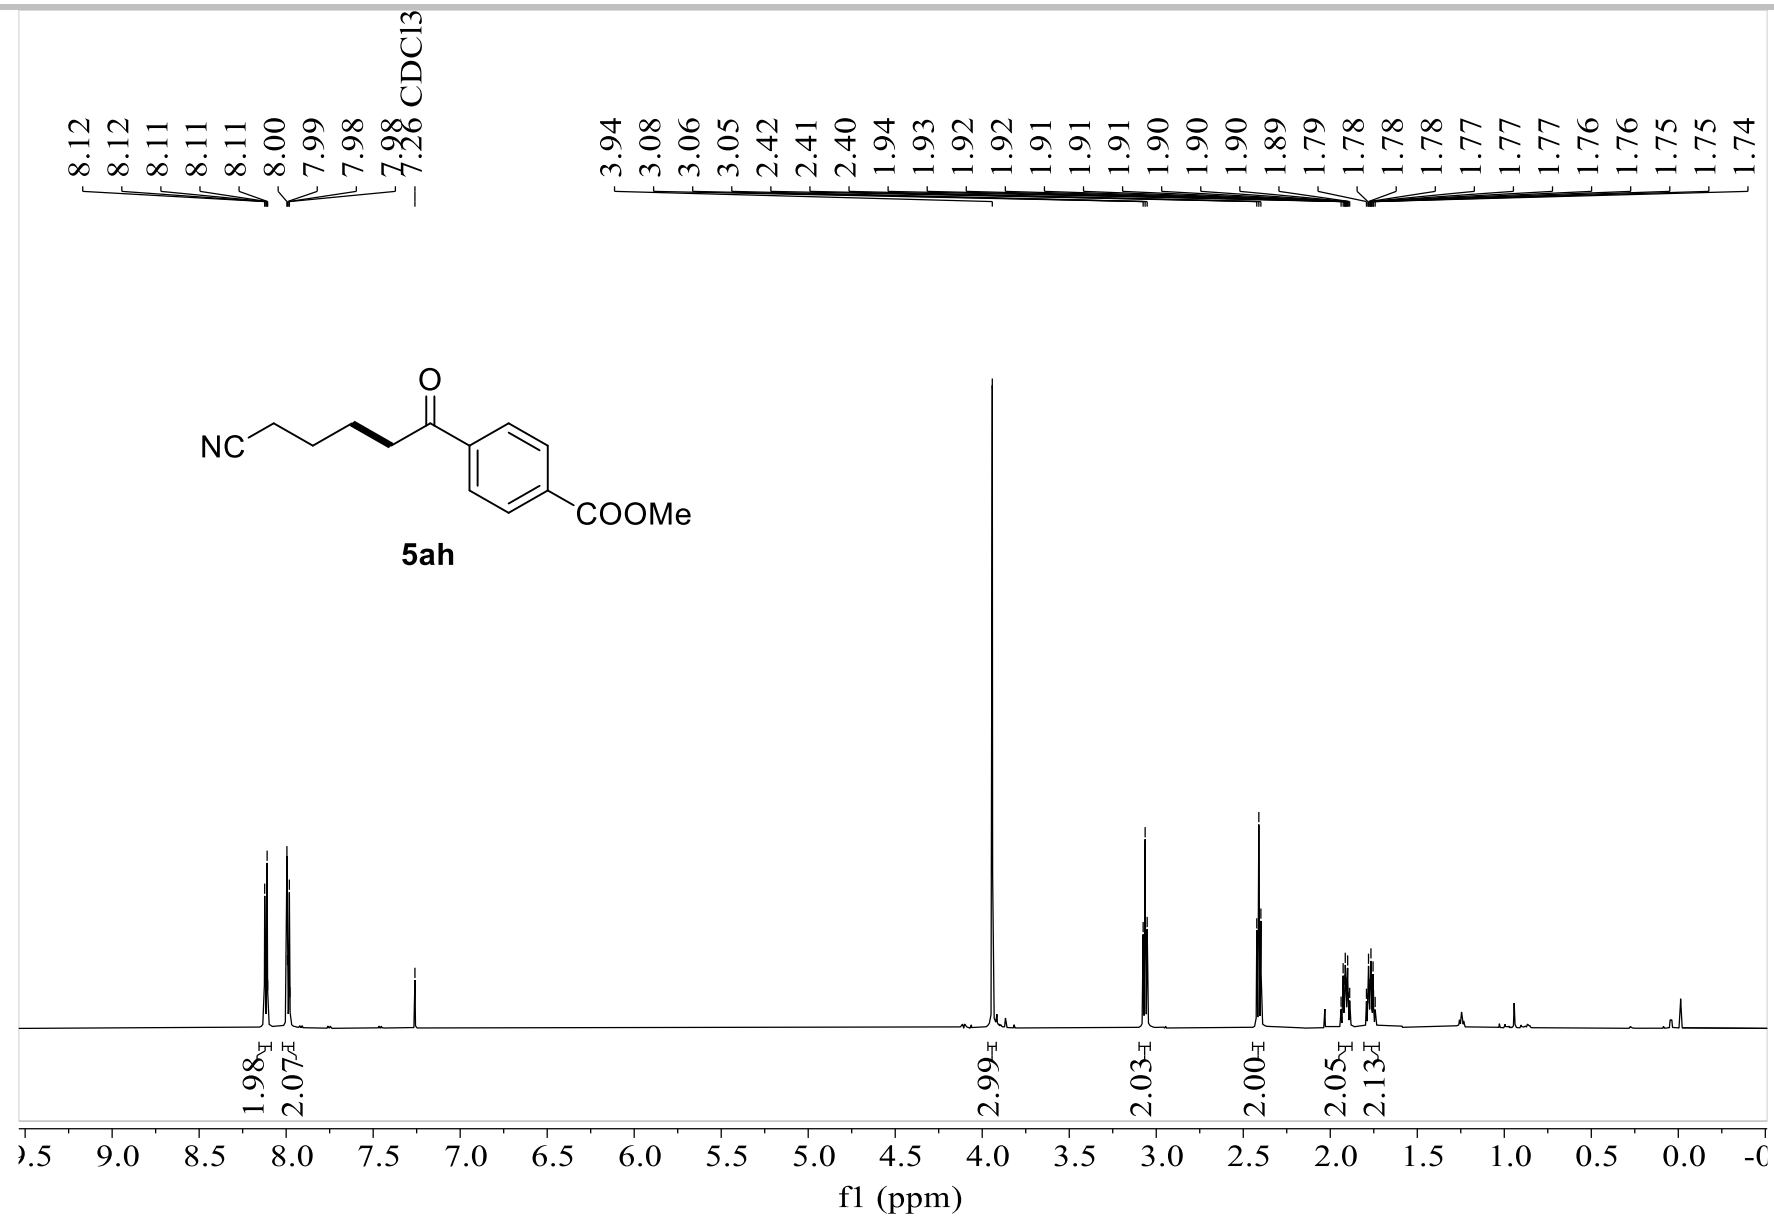

SUPPORTING INFORMATION

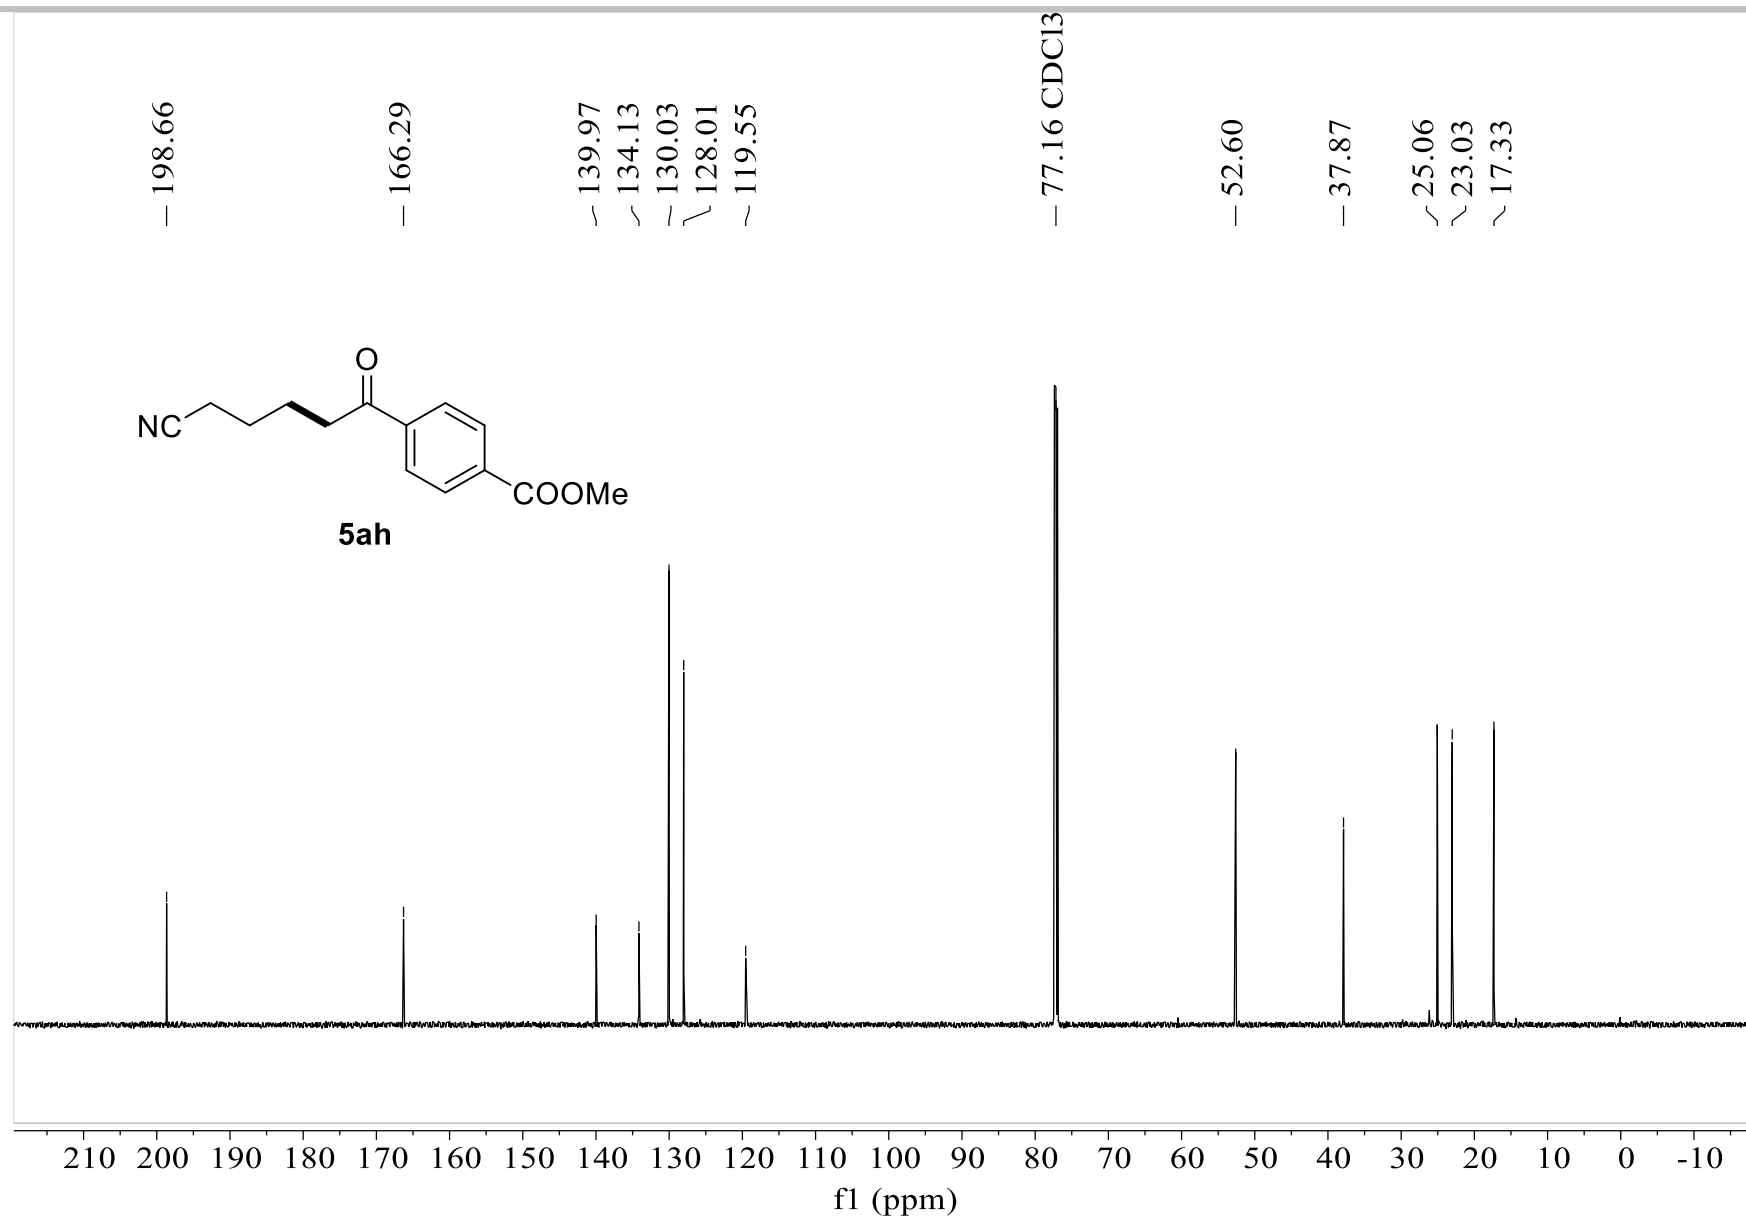

SUPPORTING INFORMATION

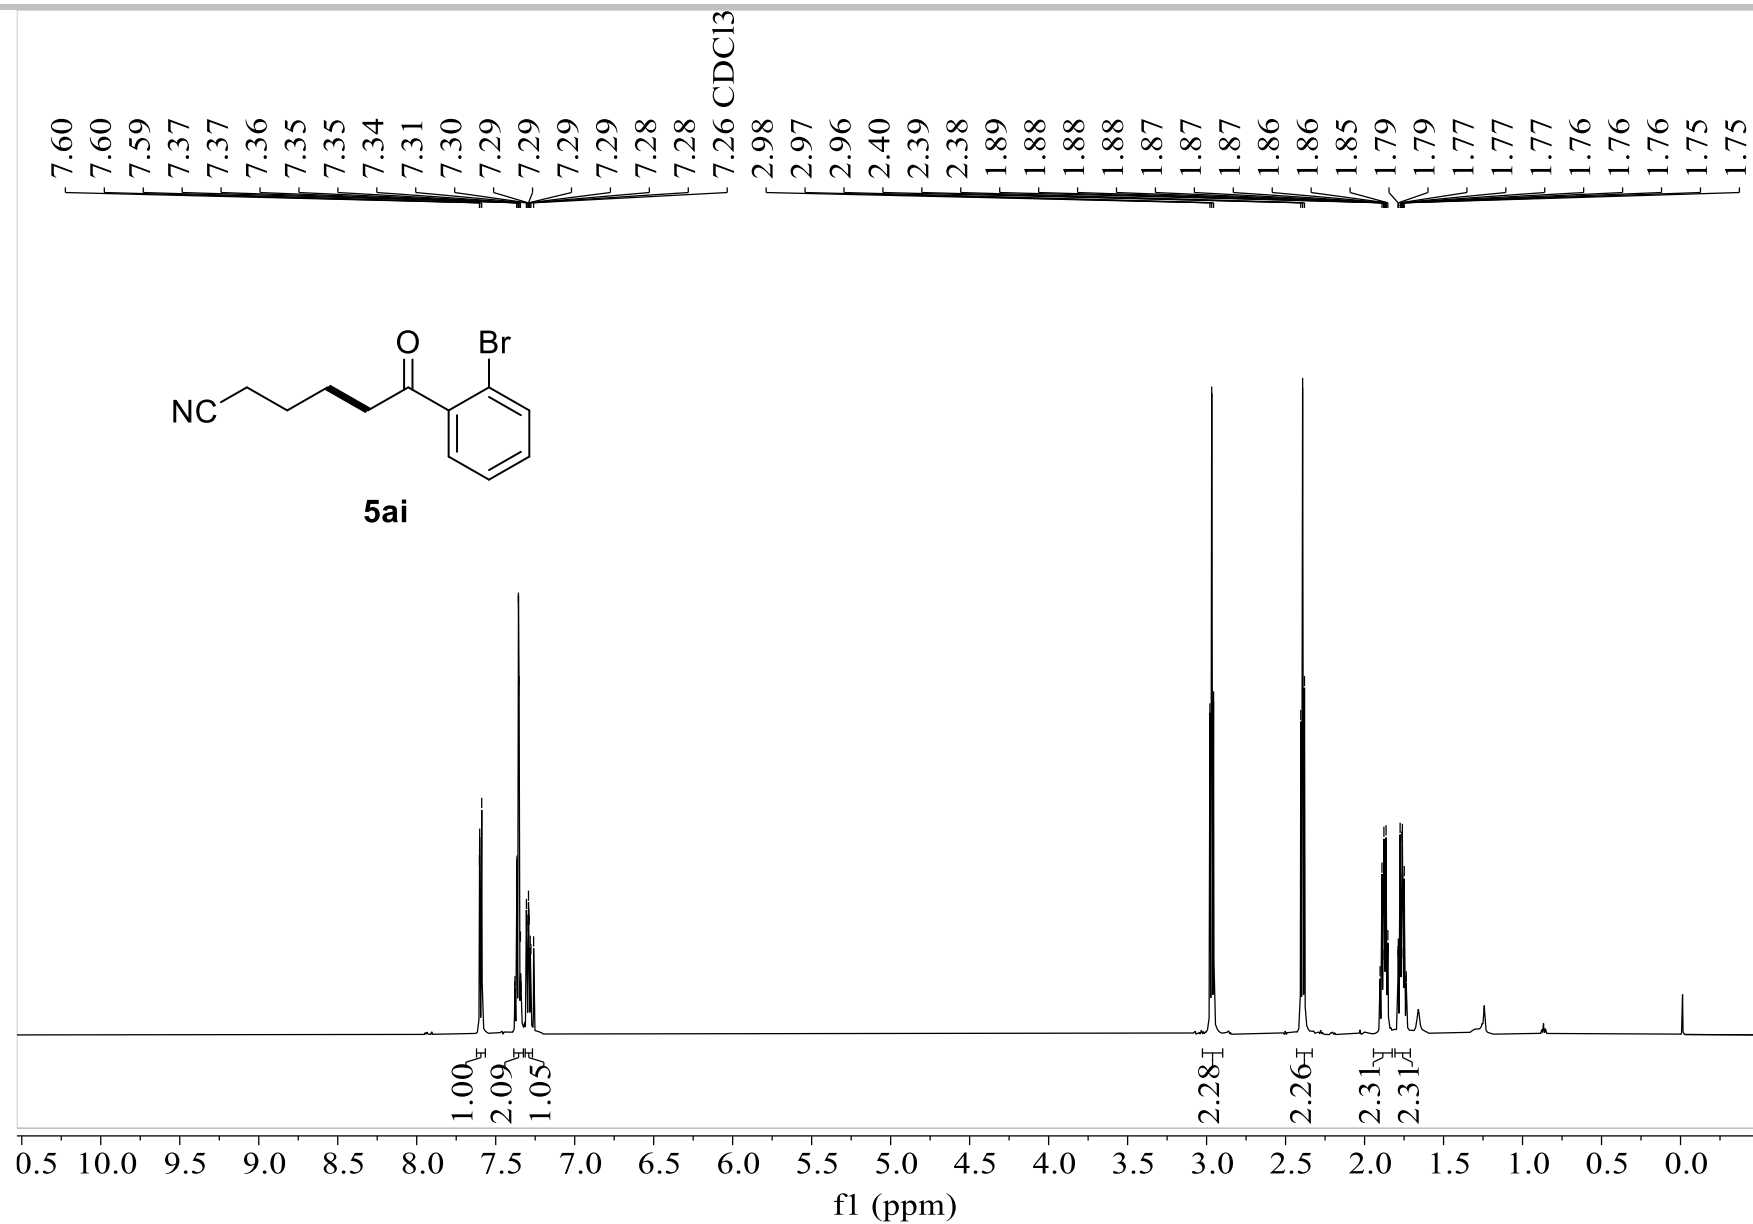

SUPPORTING INFORMATION

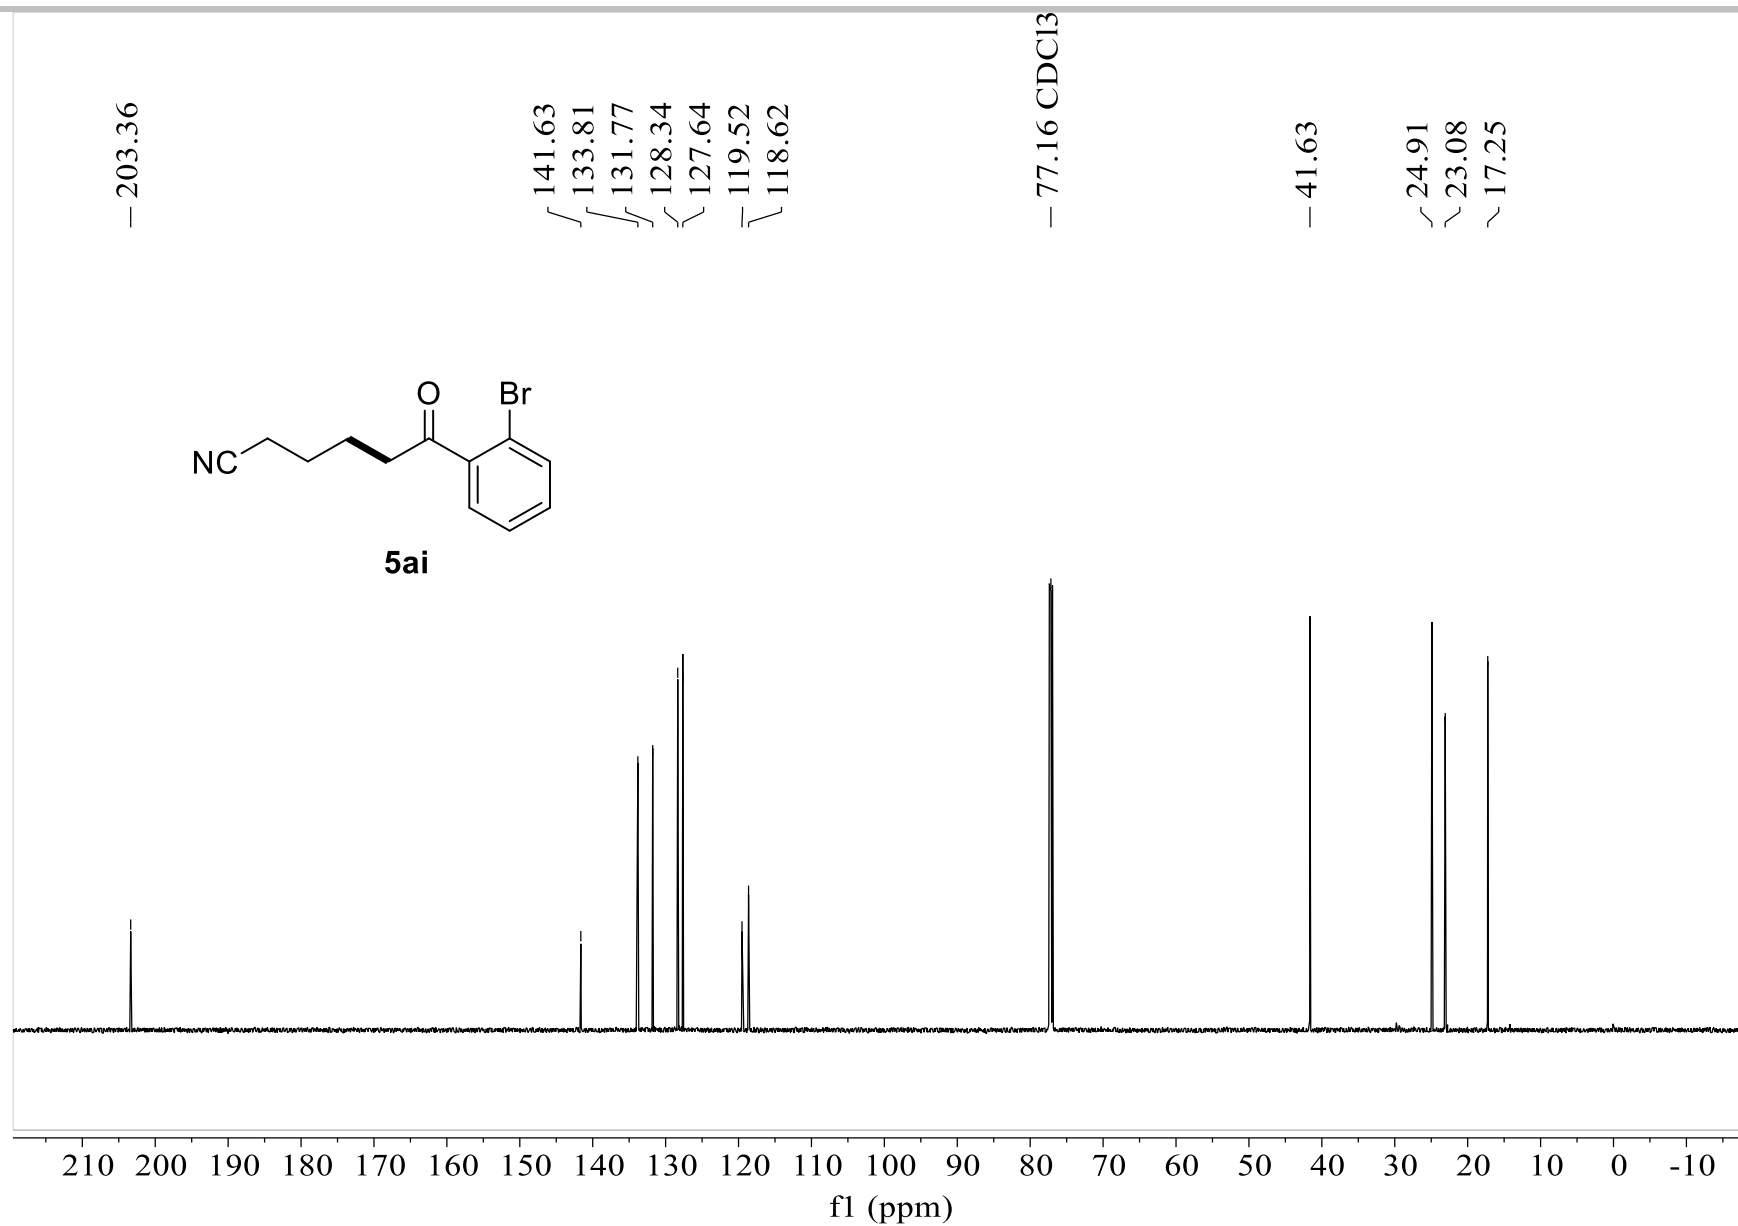

SUPPORTING INFORMATION

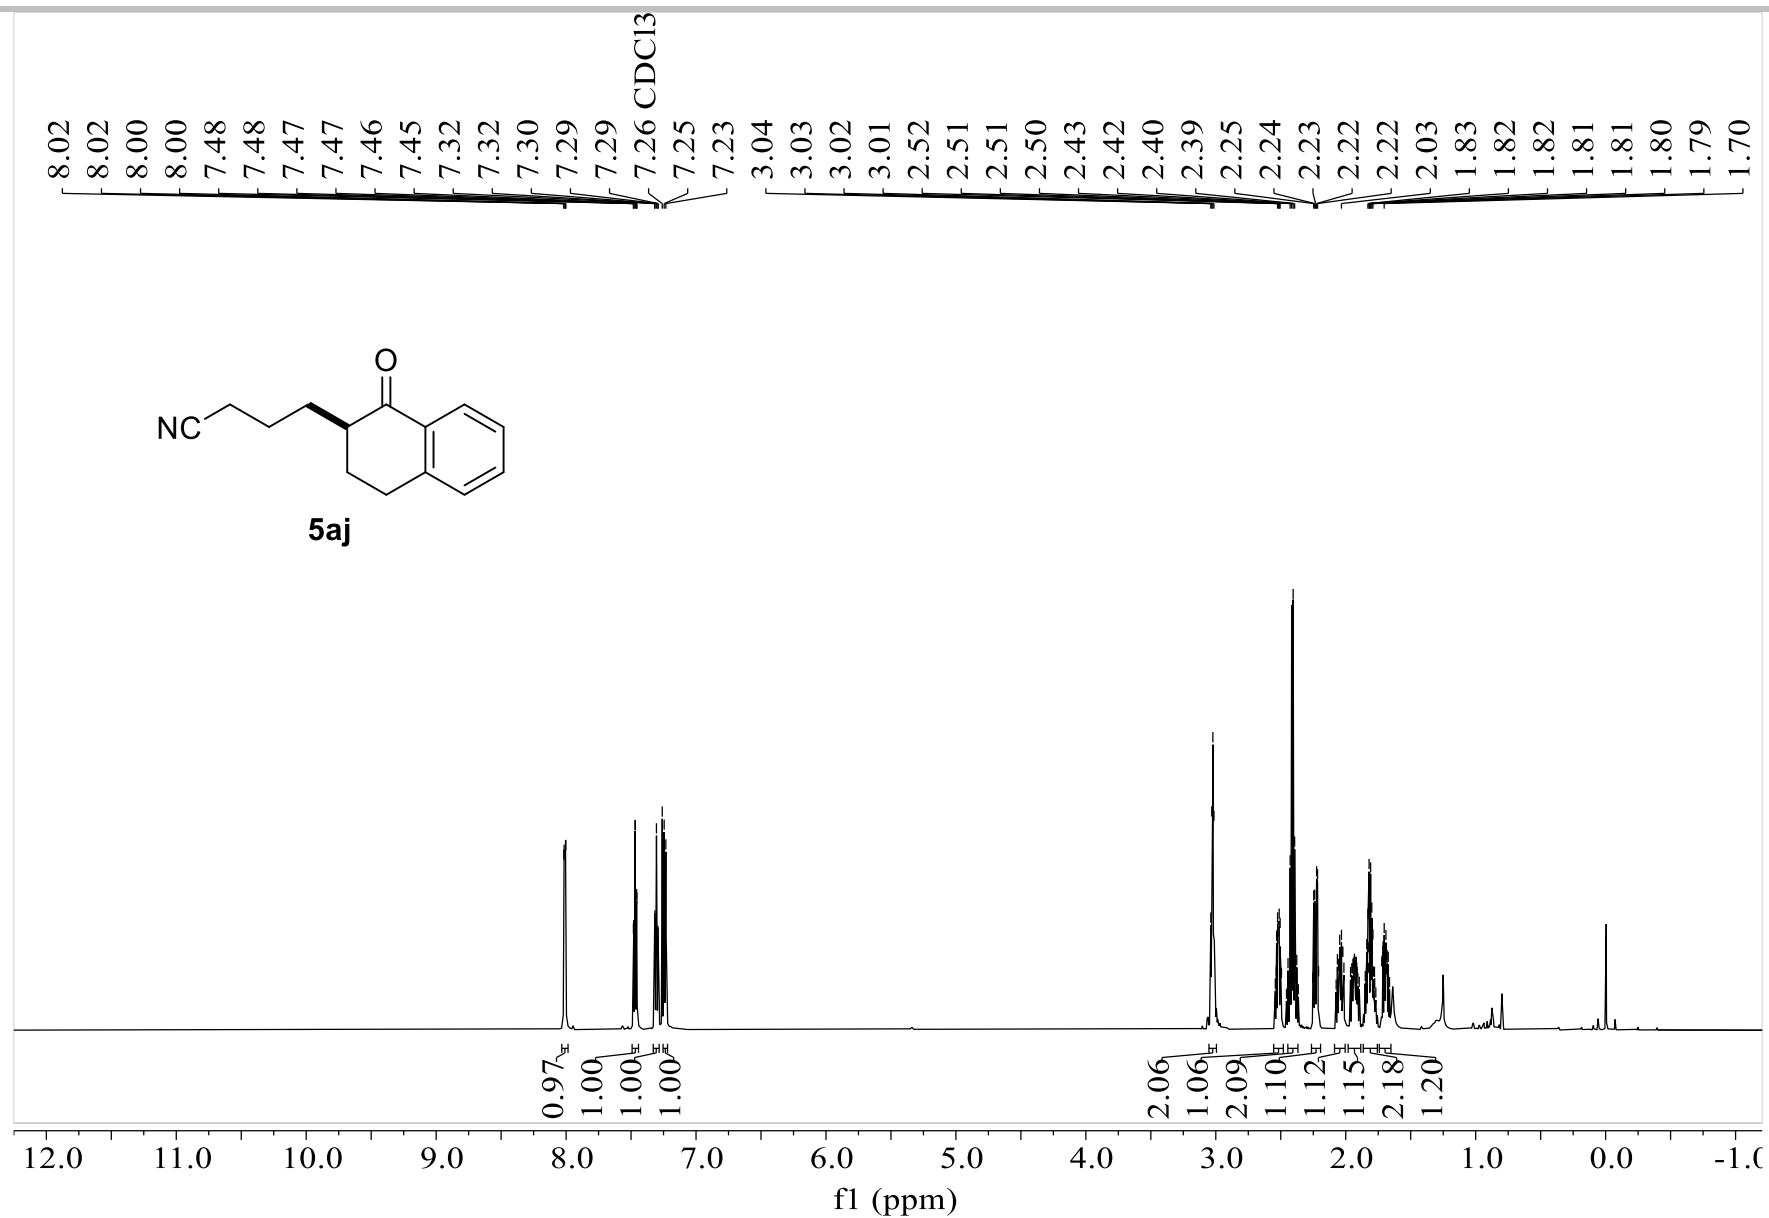



SUPPORTING INFORMATION

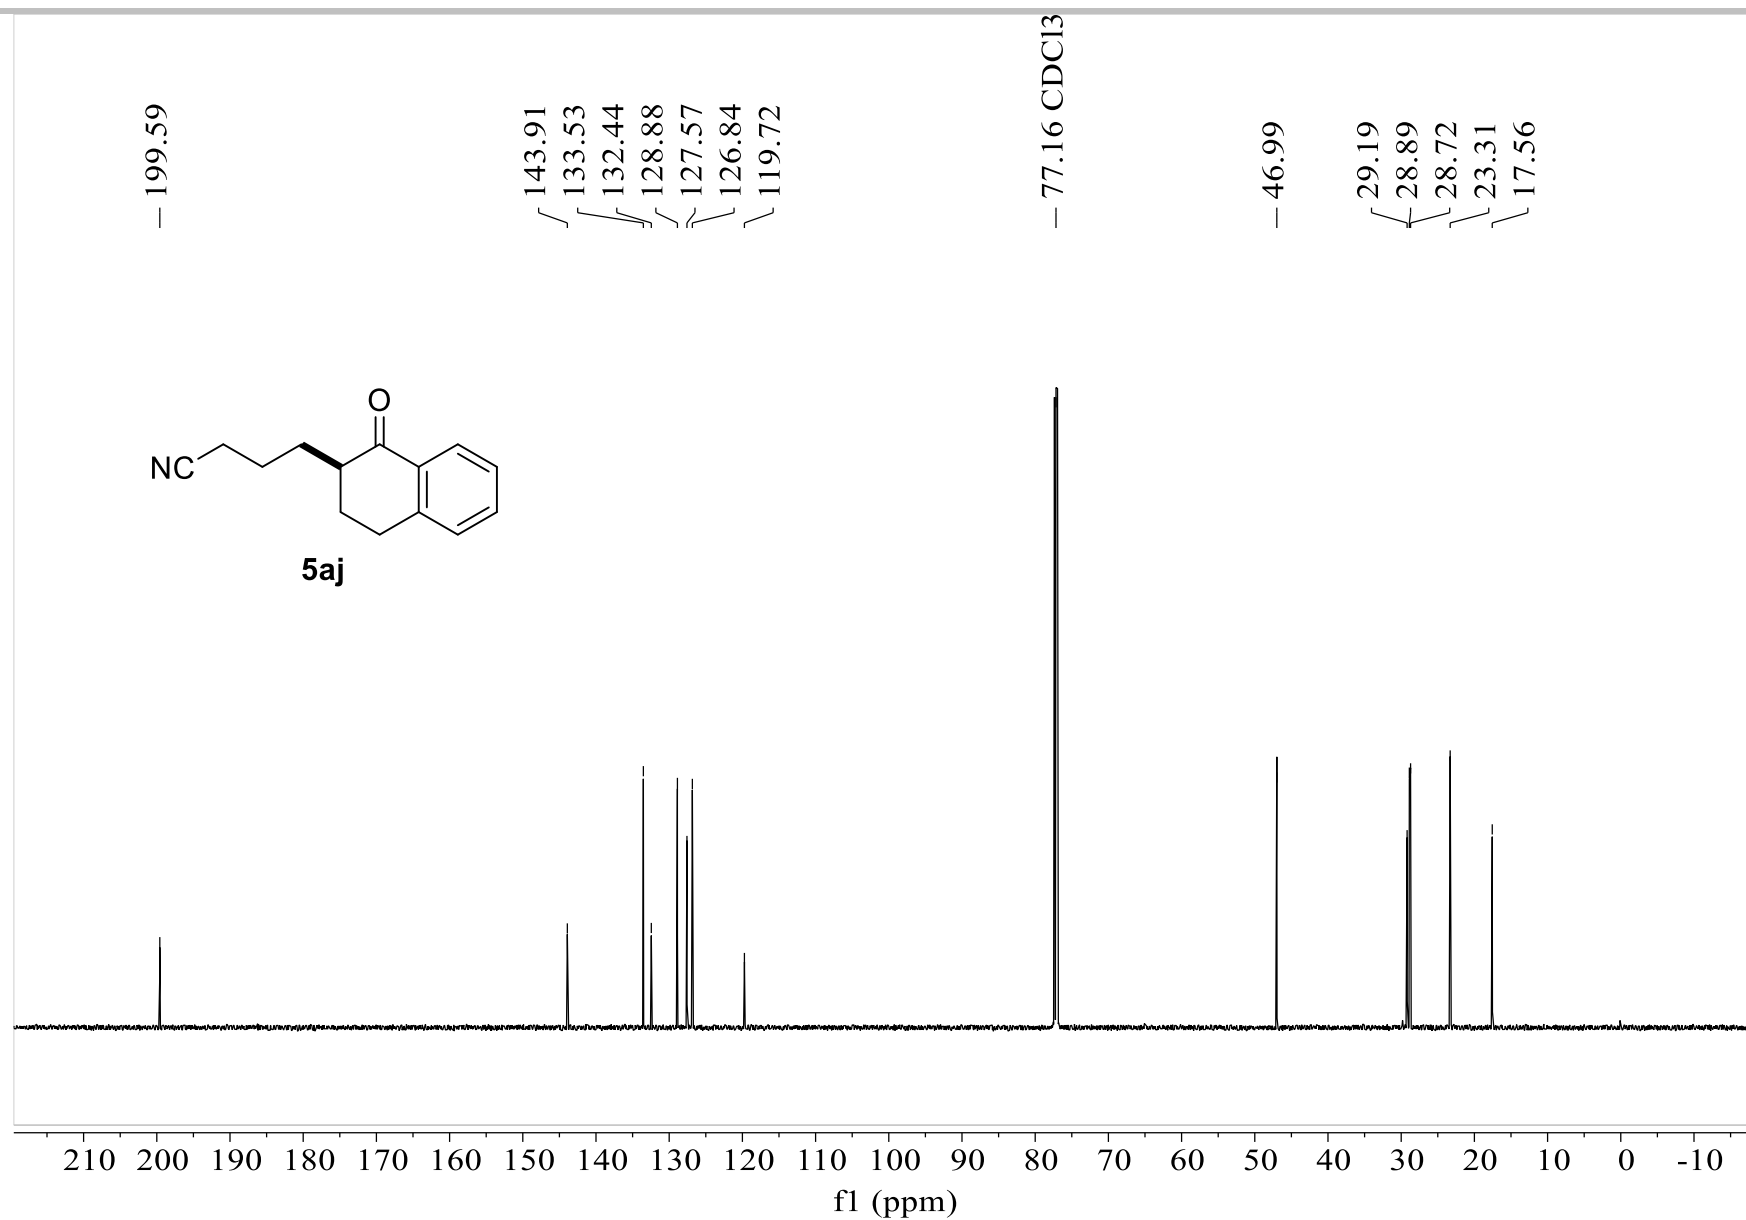

# SUPPORTING INFORMATION

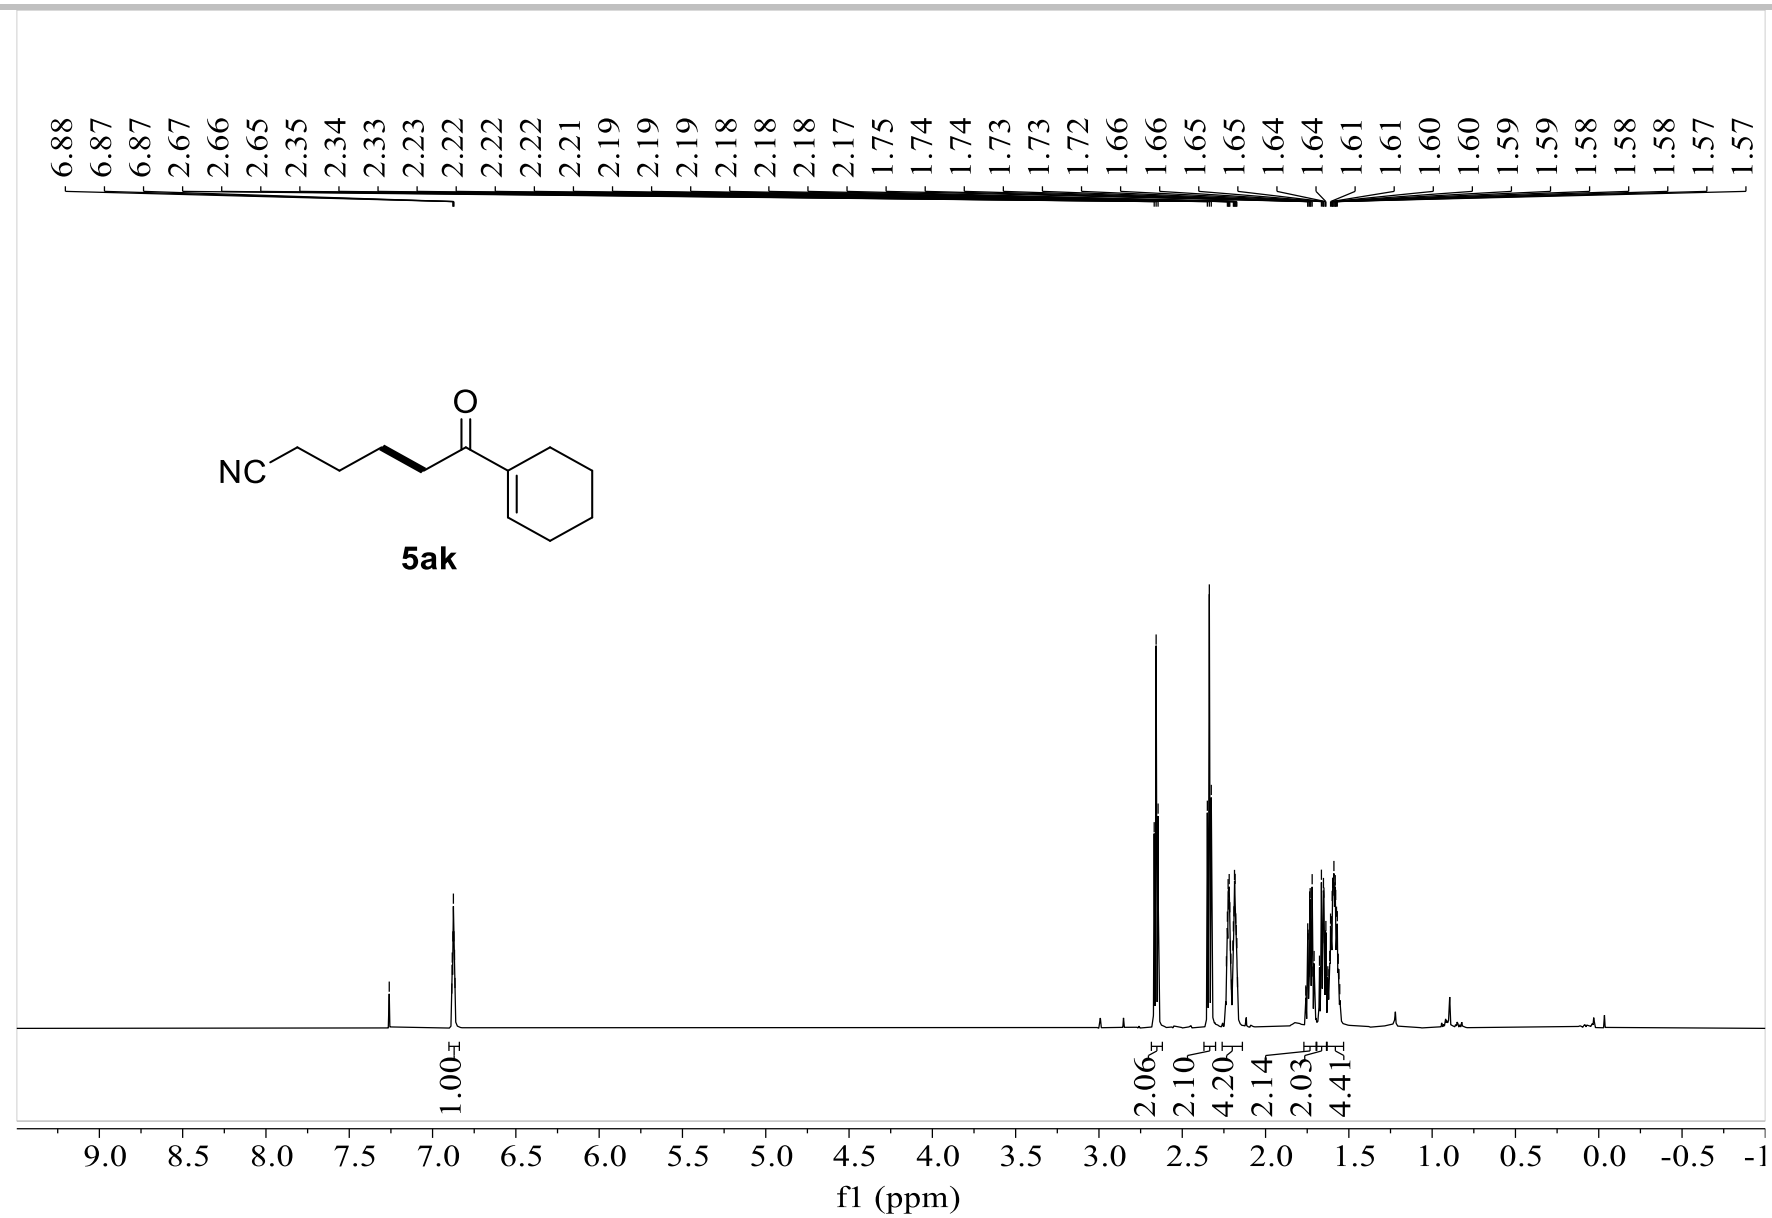

SUPPORTING INFORMATION

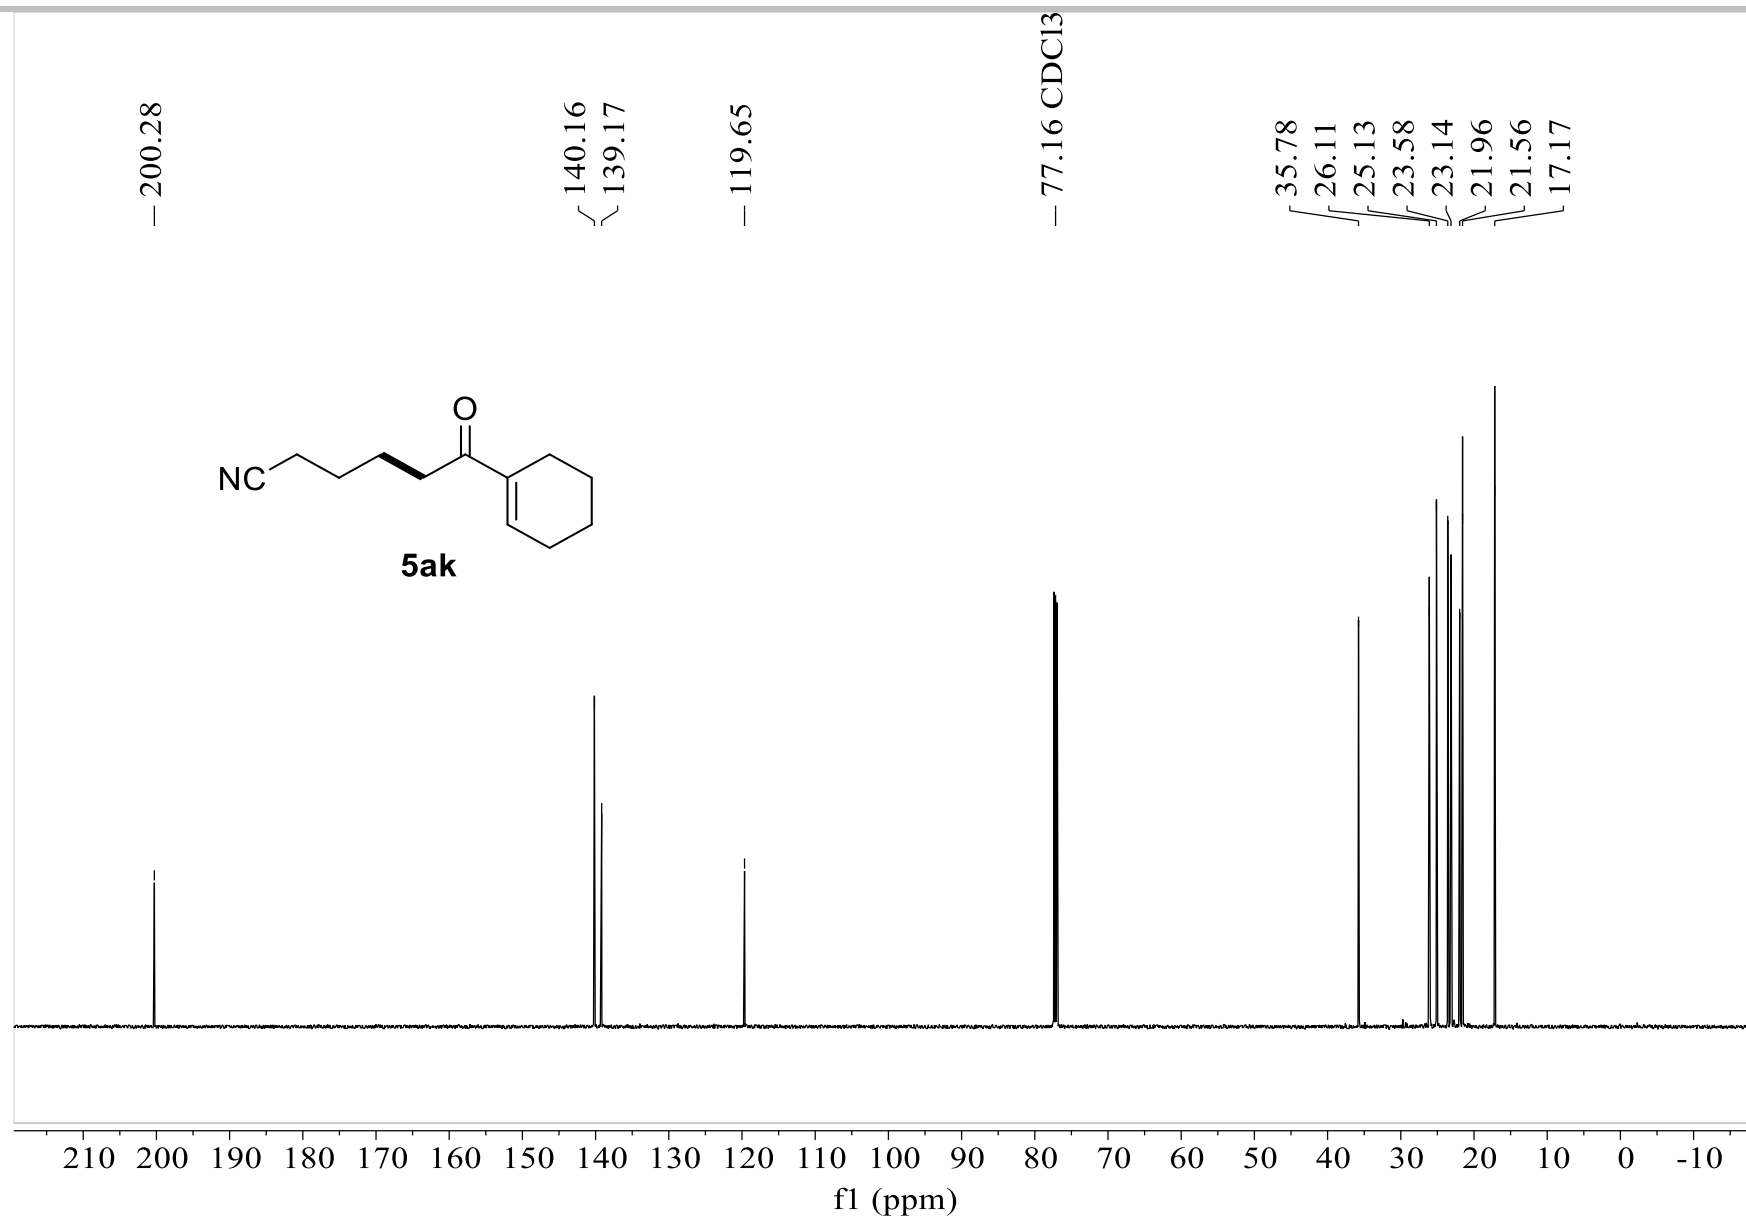

SUPPORTING INFORMATION

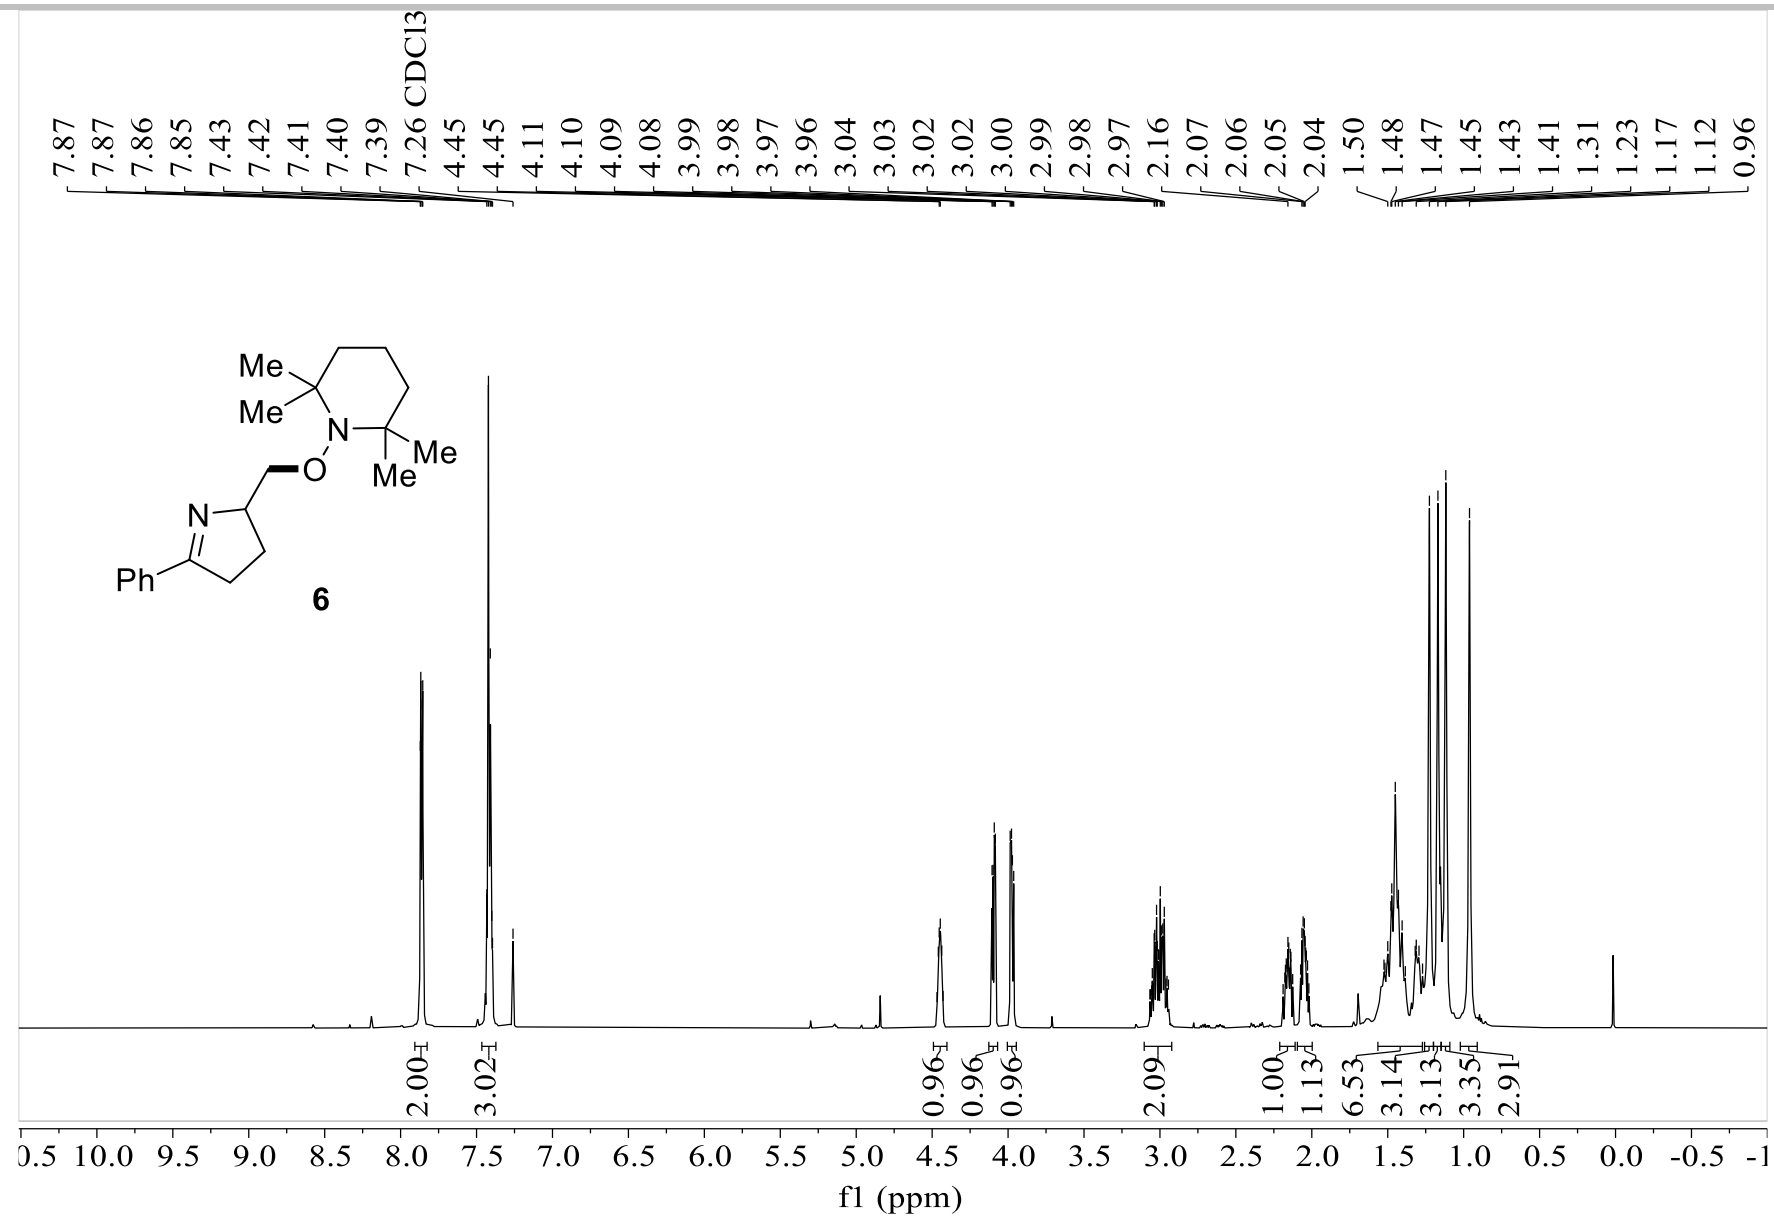

SUPPORTING INFORMATION

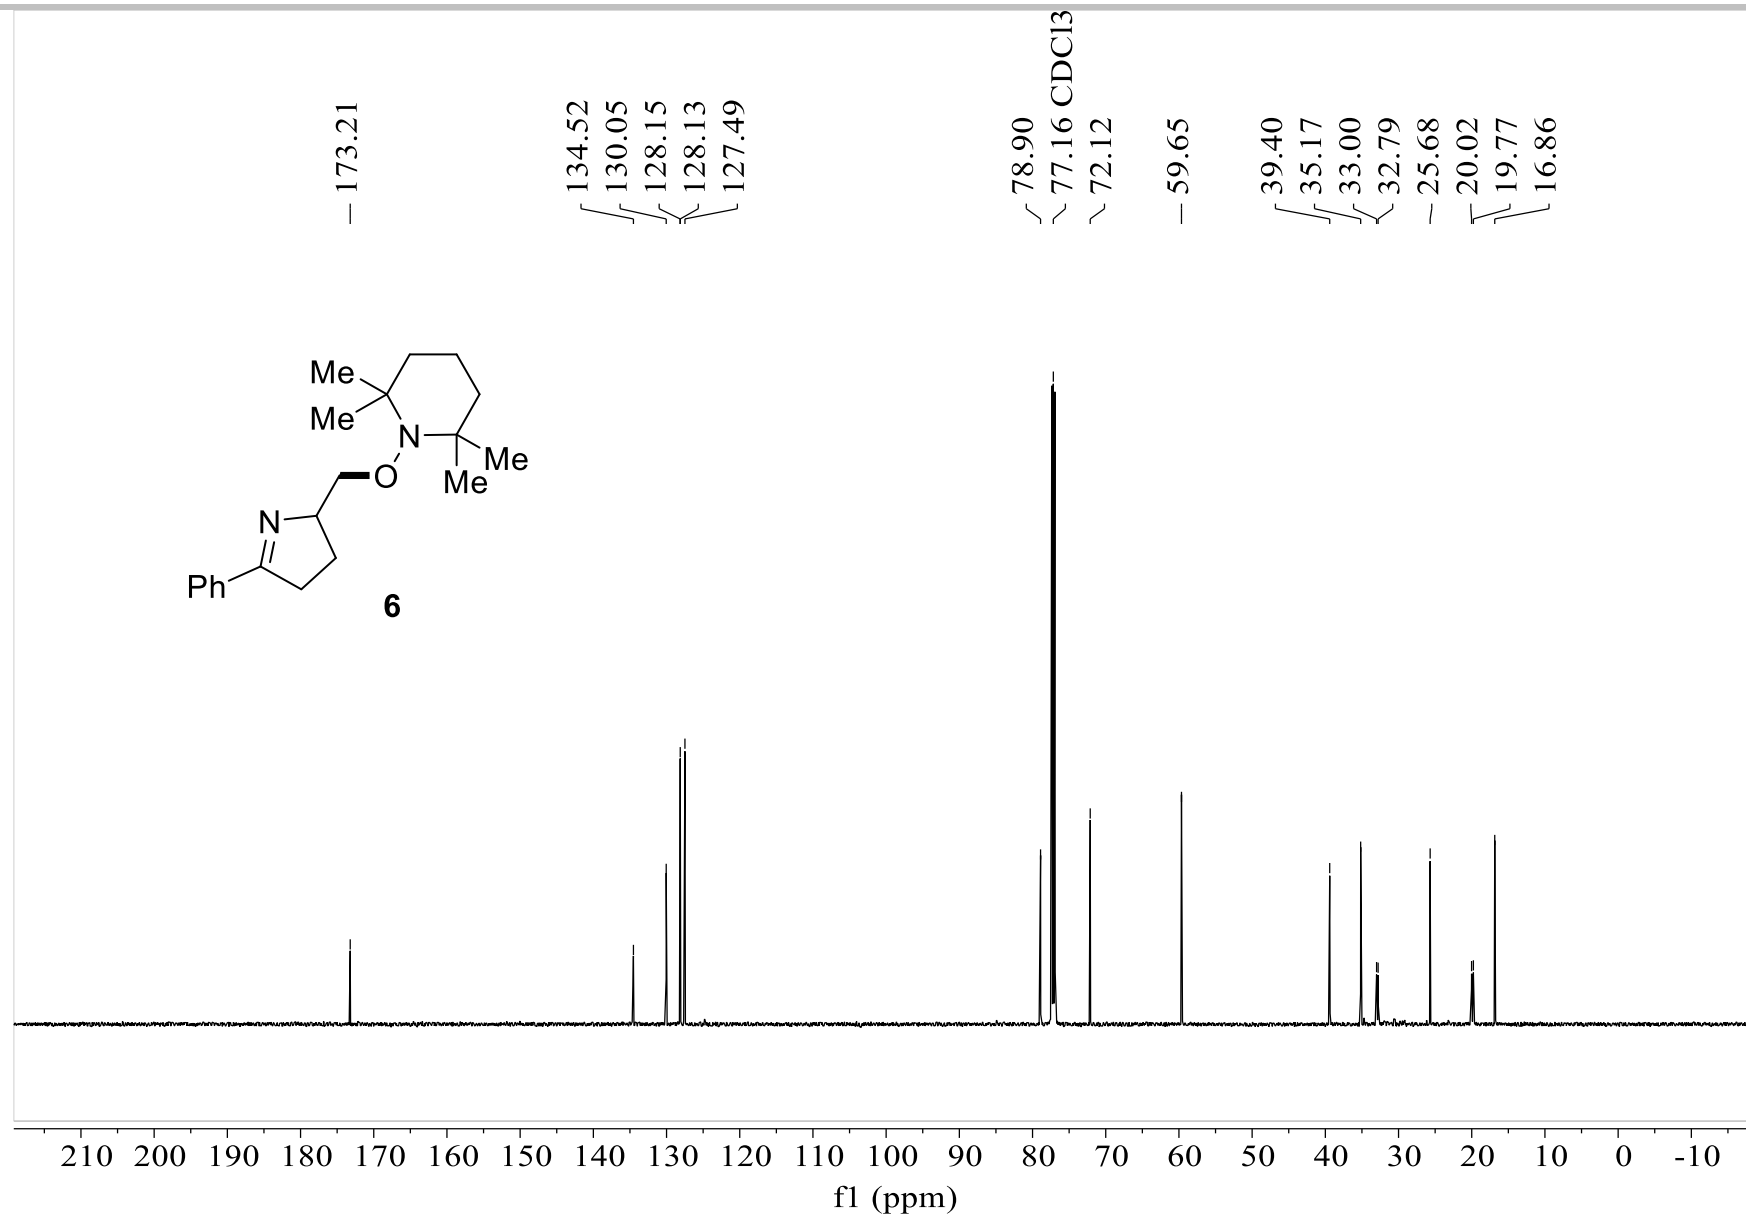

SUPPORTING INFORMATION

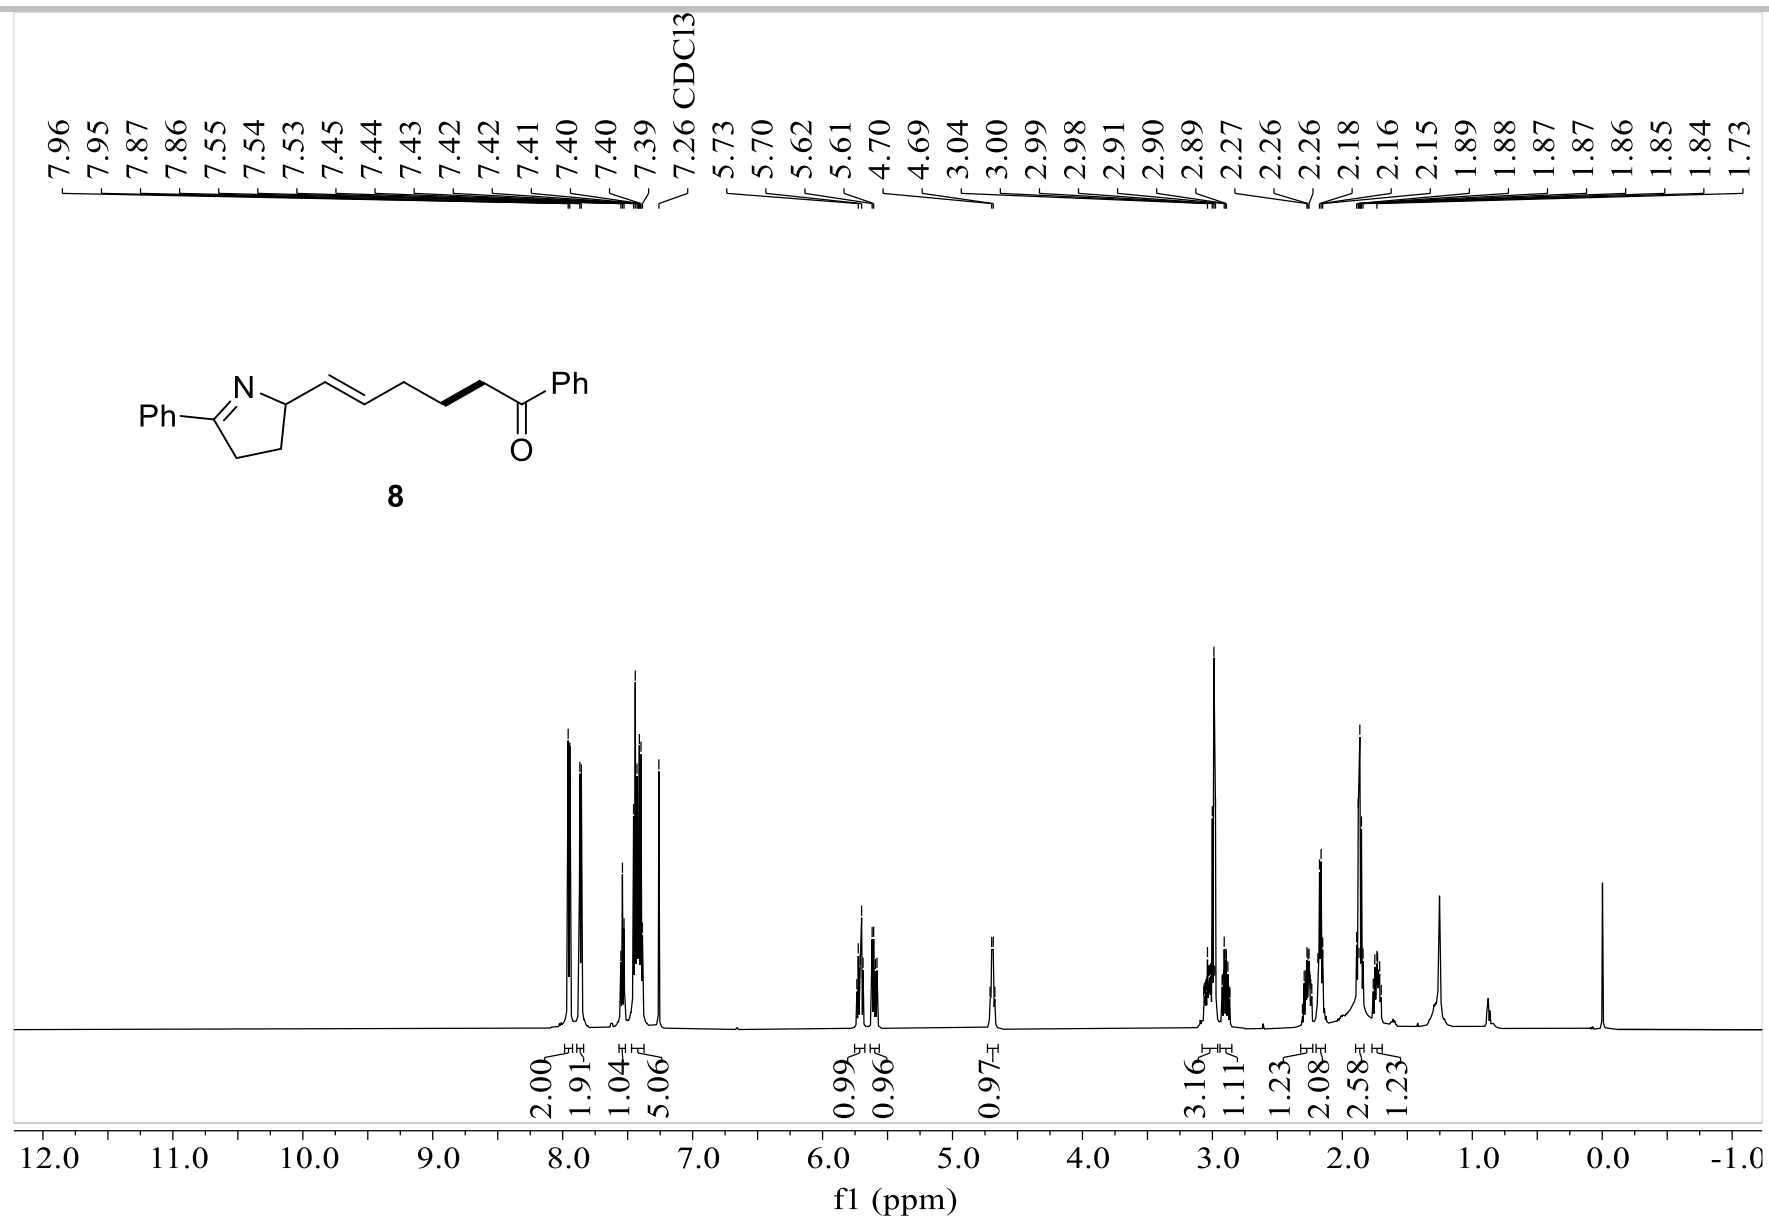

# SUPPORTING INFORMATION

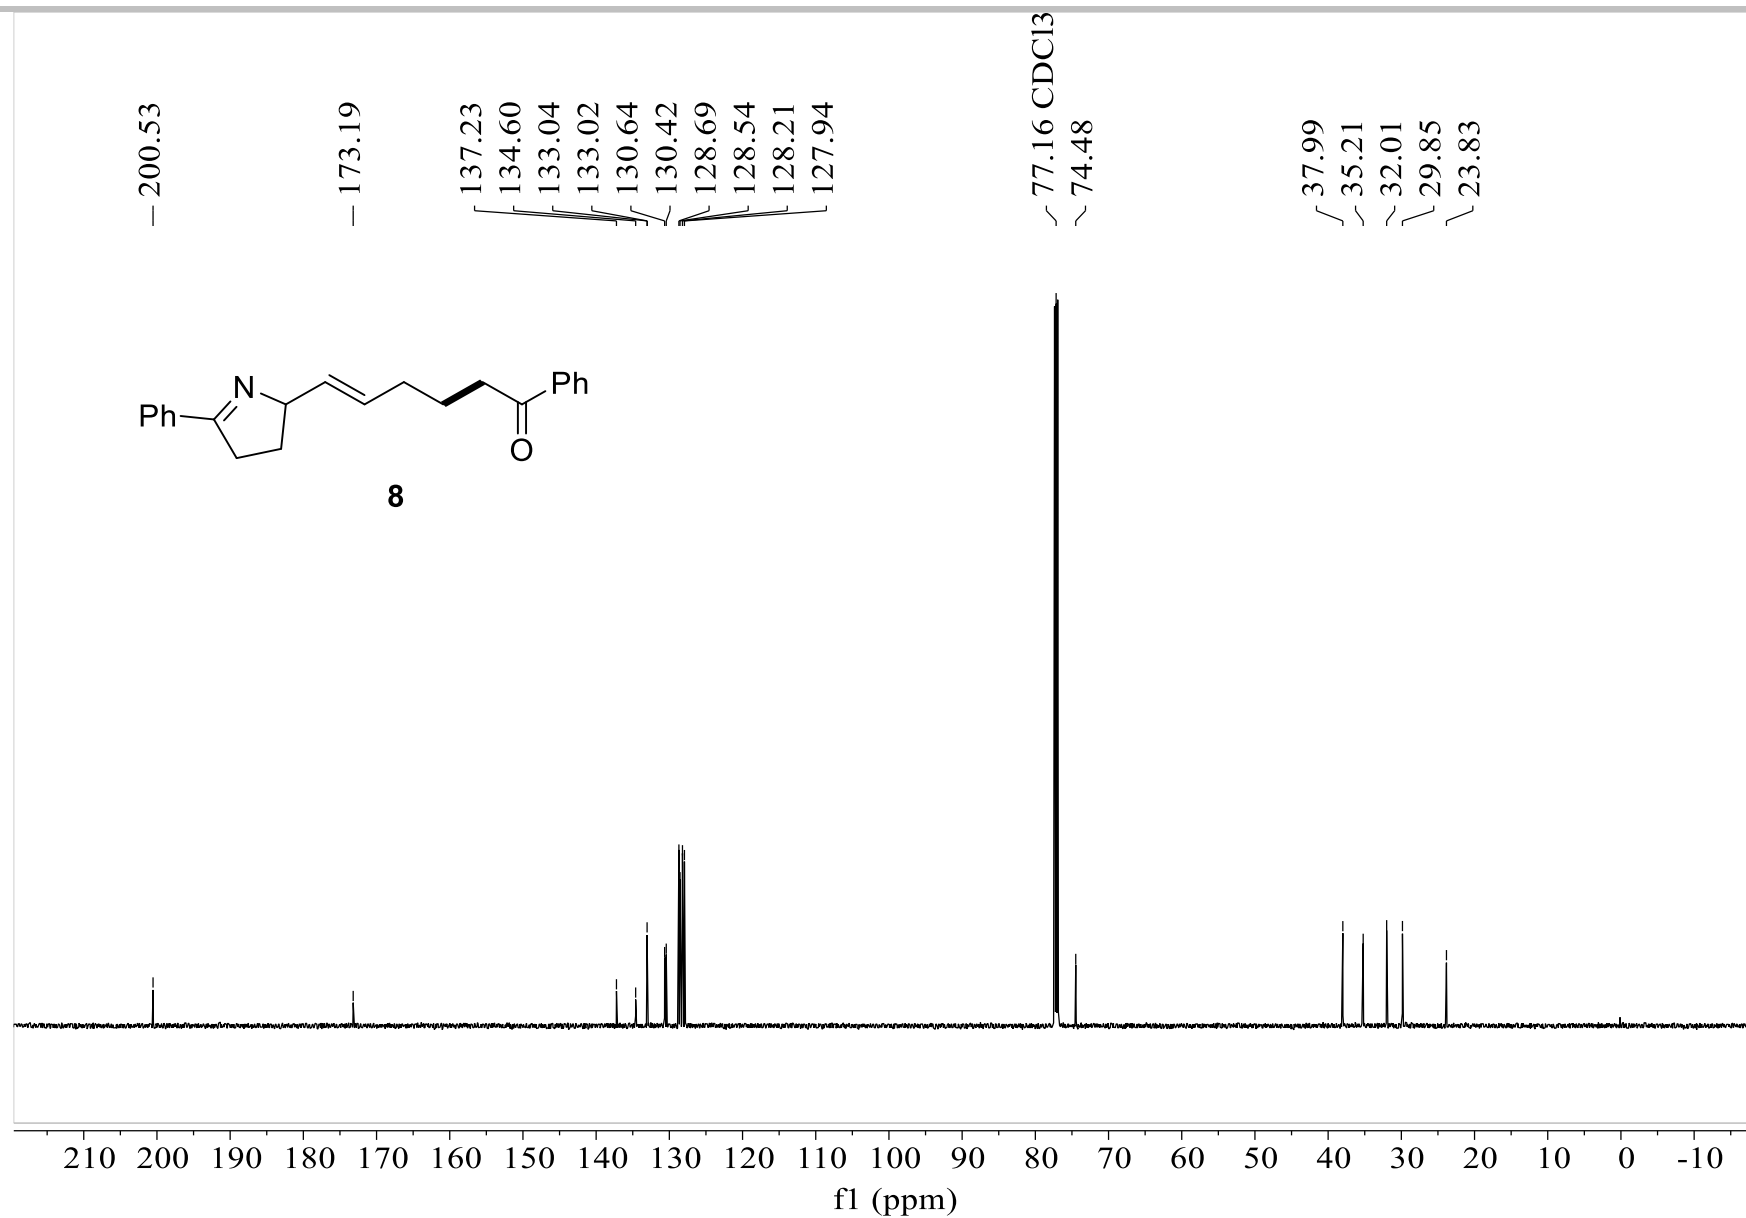

SUPPORTING INFORMATION

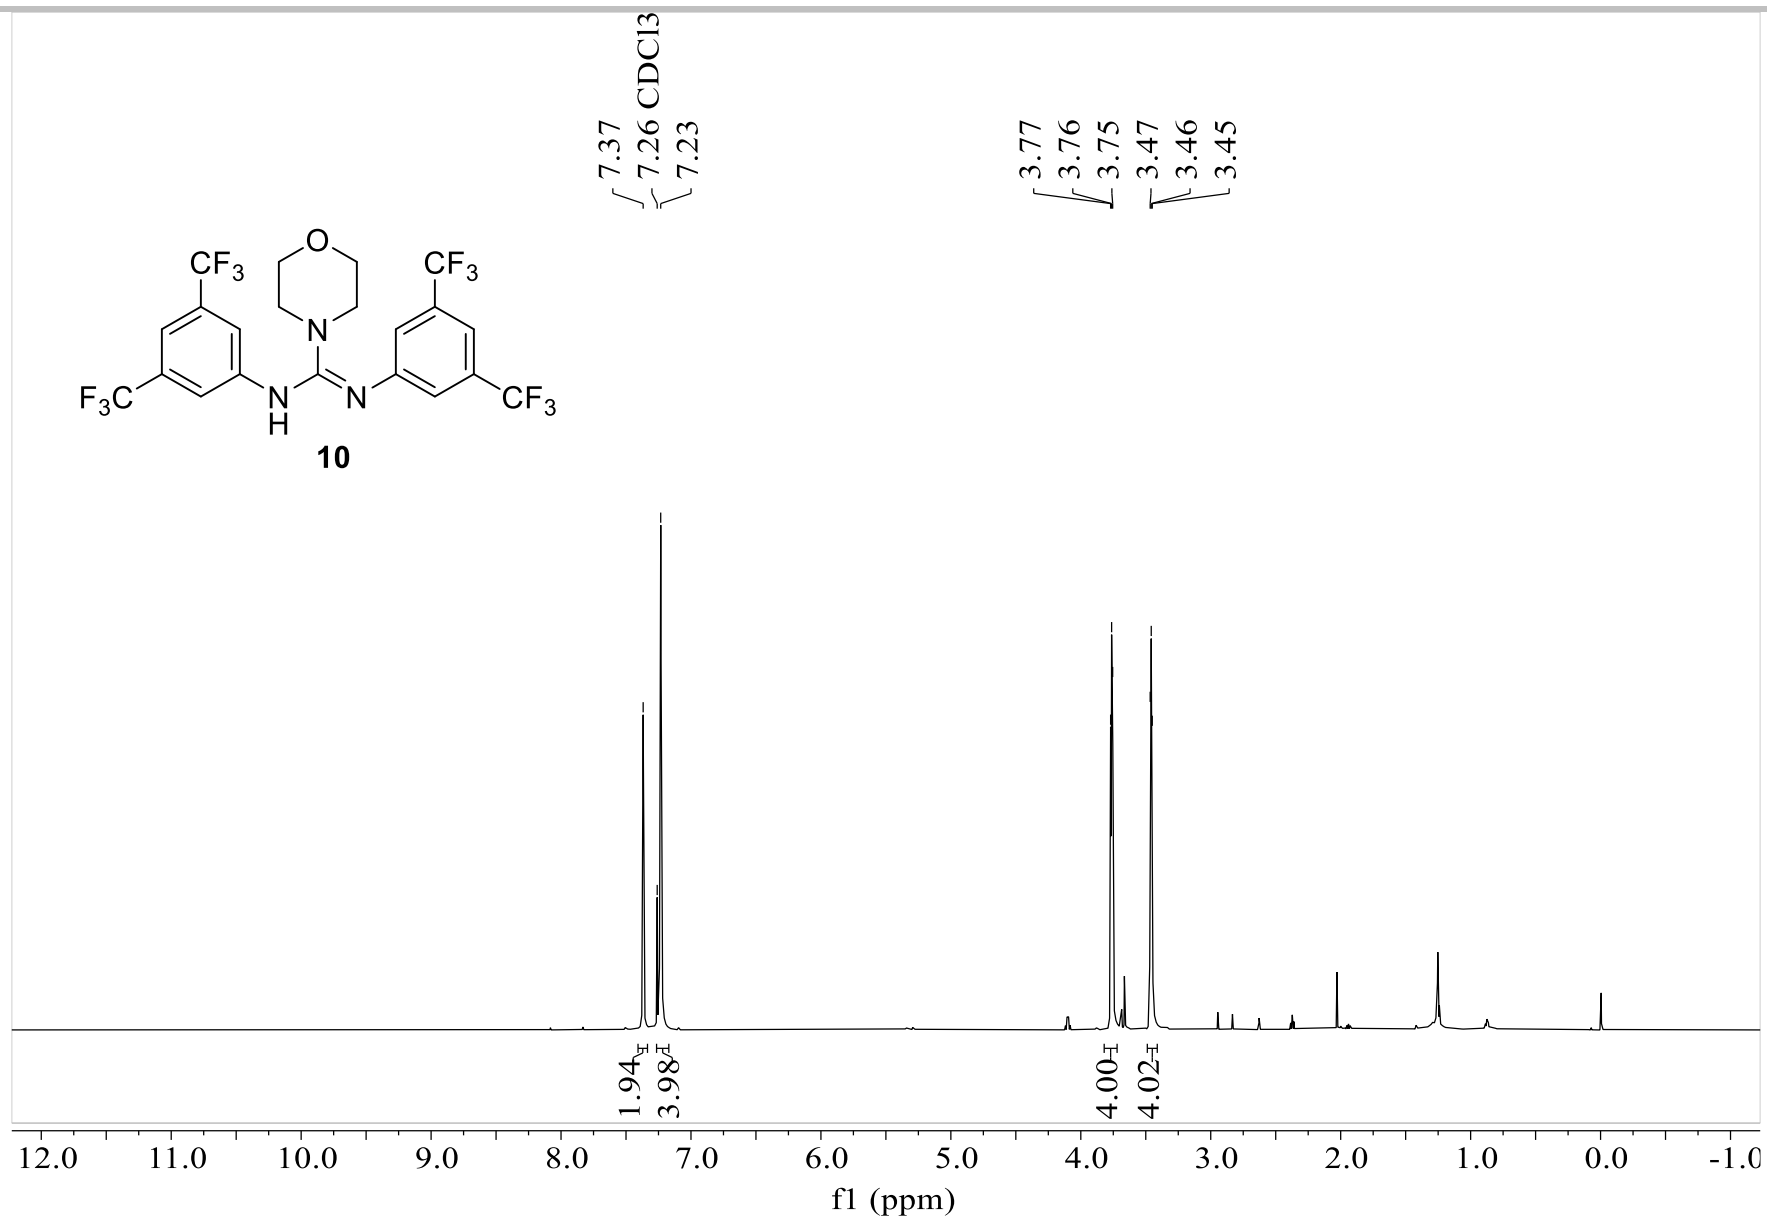



SUPPORTING INFORMATION

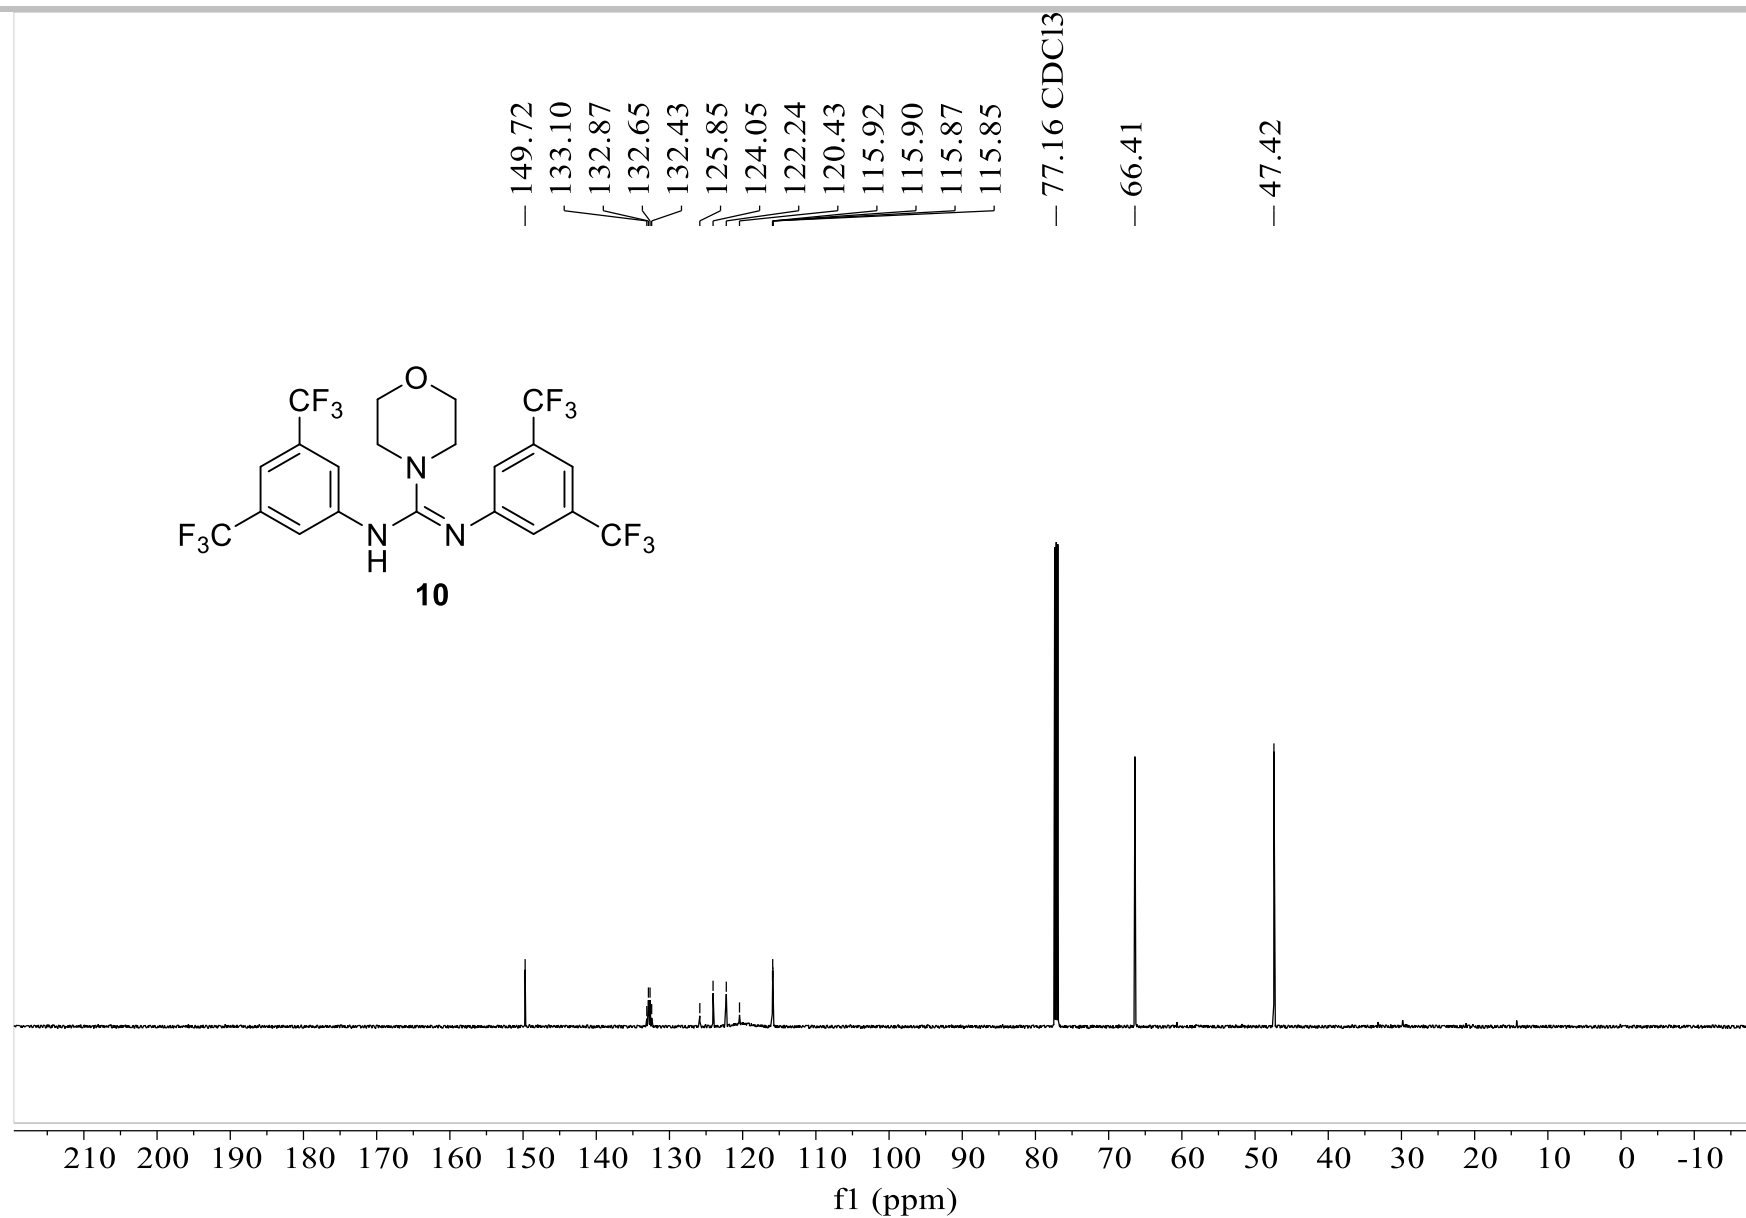

SUPPORTING INFORMATION

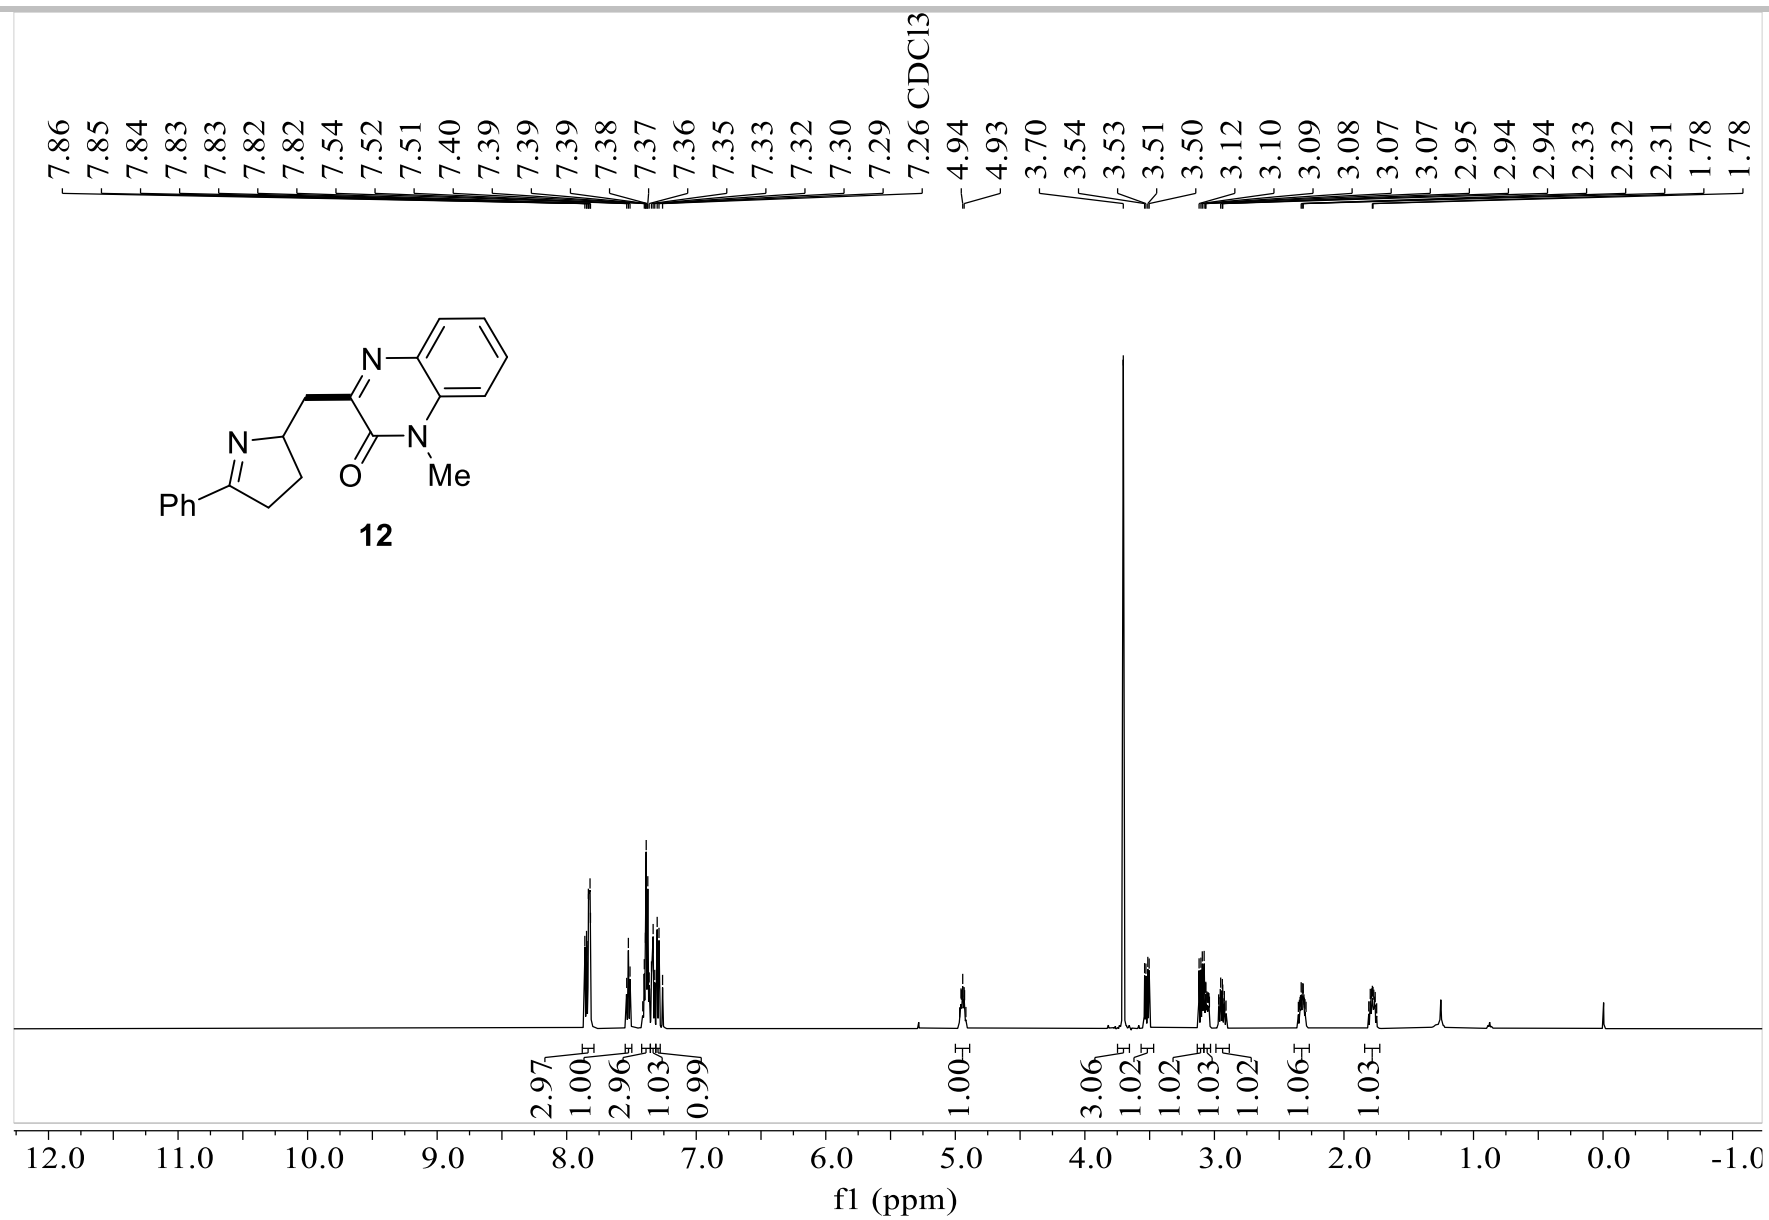

SUPPORTING INFORMATION

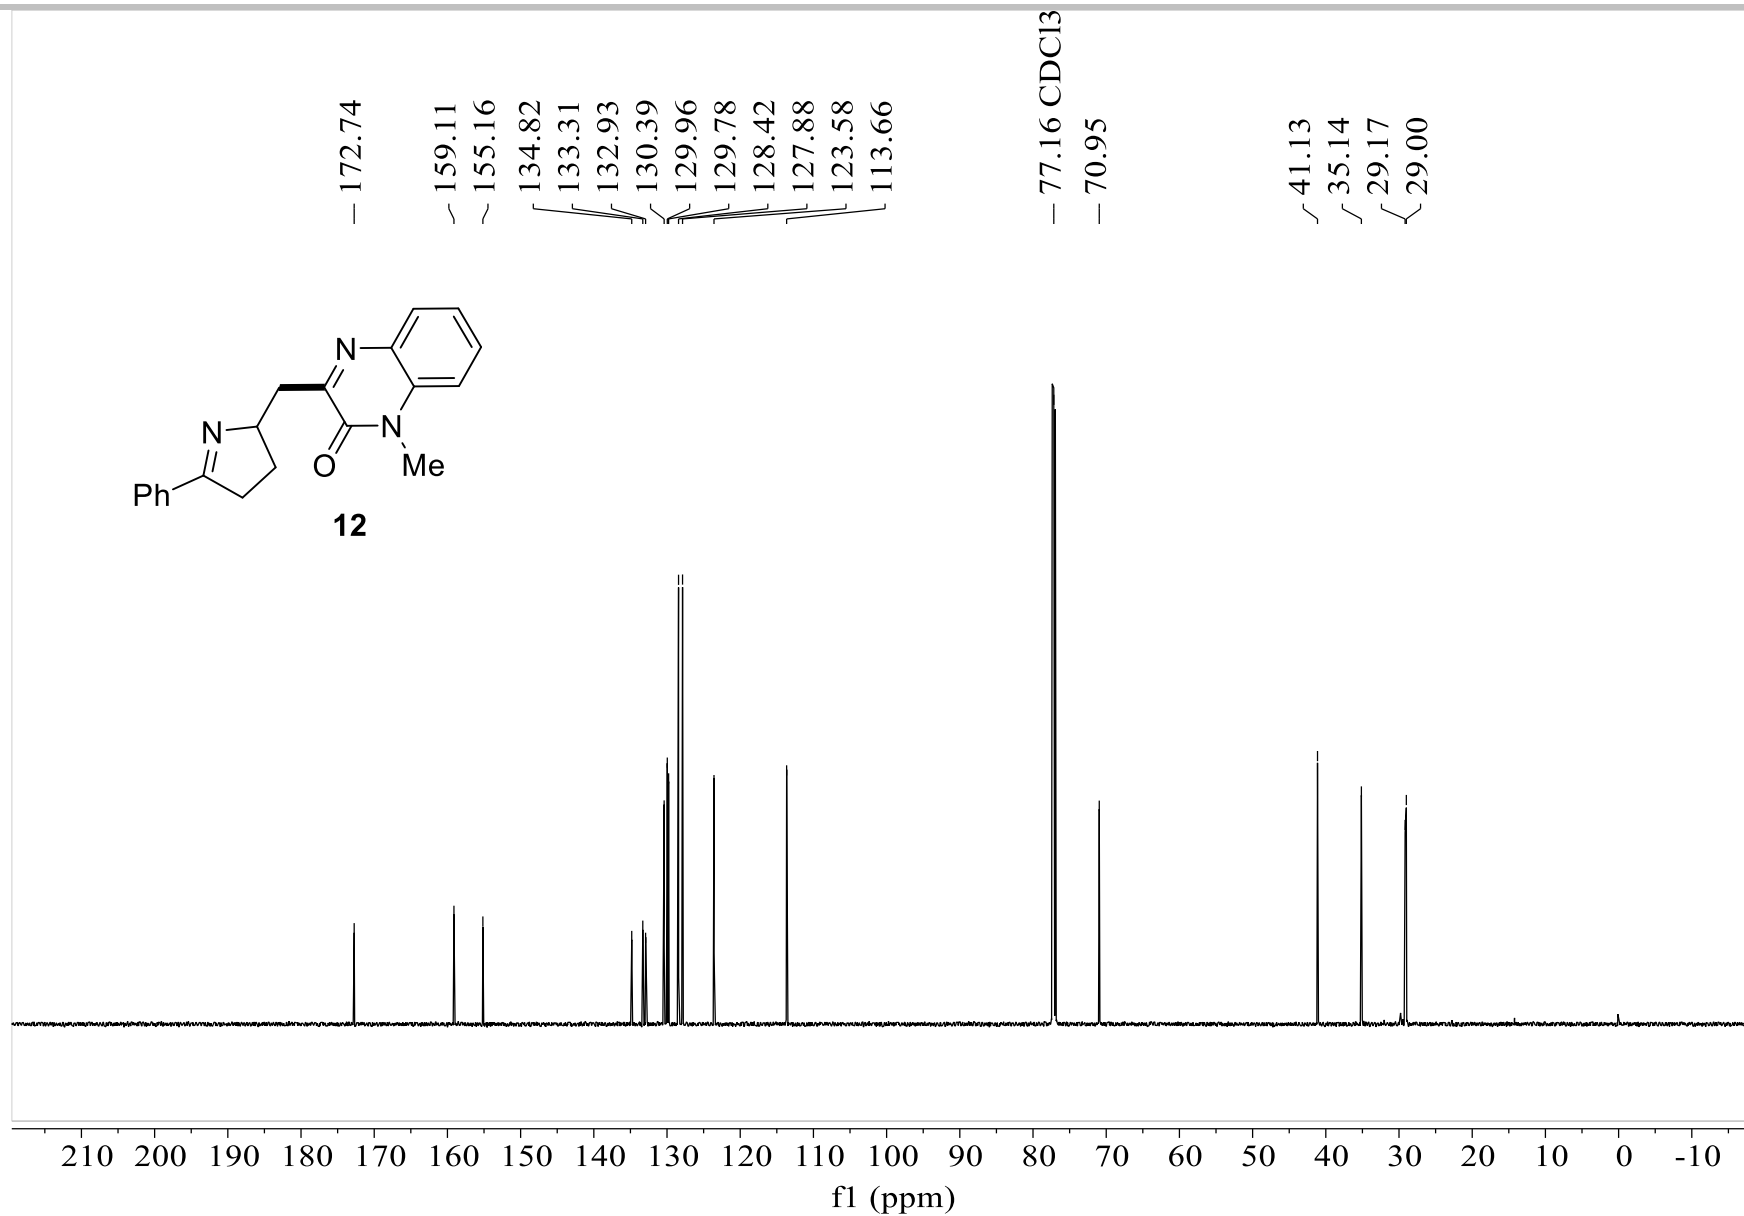

SUPPORTING INFORMATION

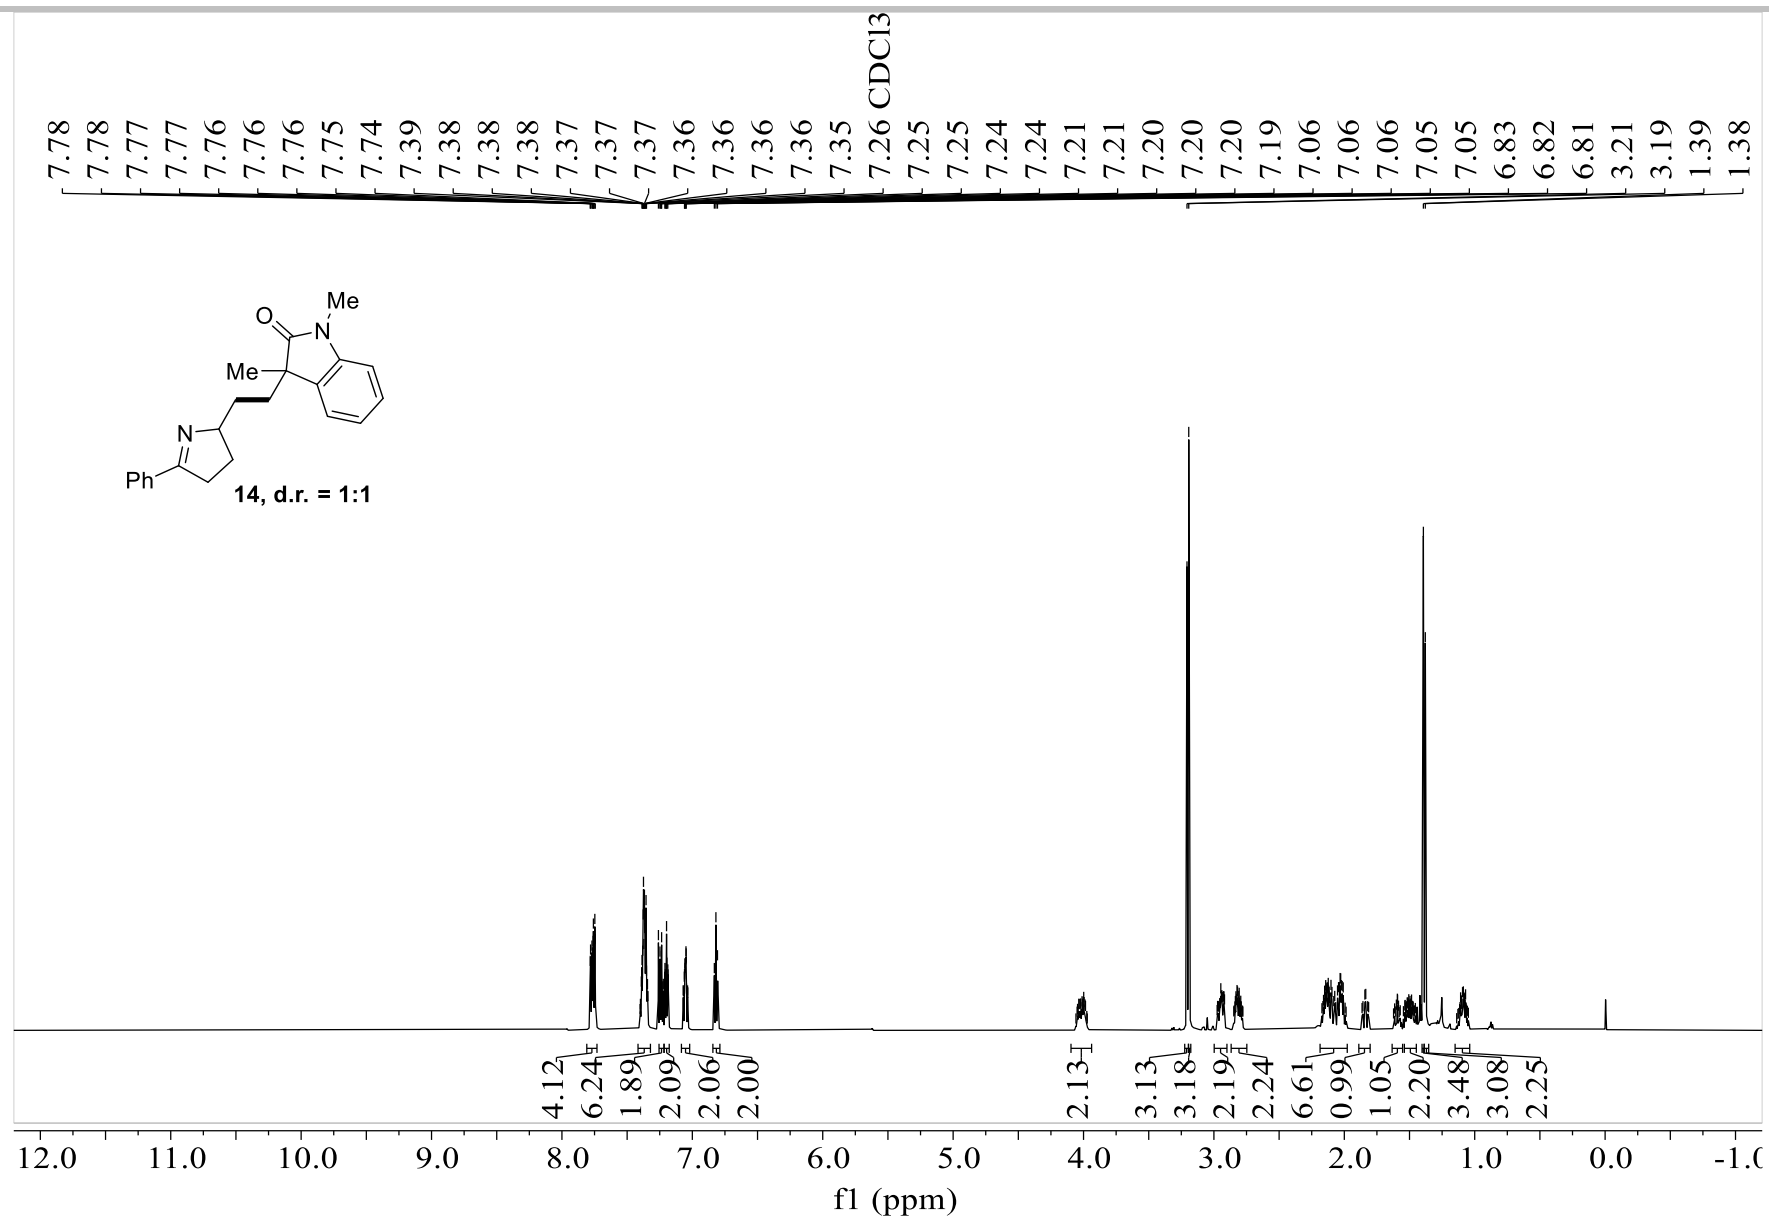

SUPPORTING INFORMATION

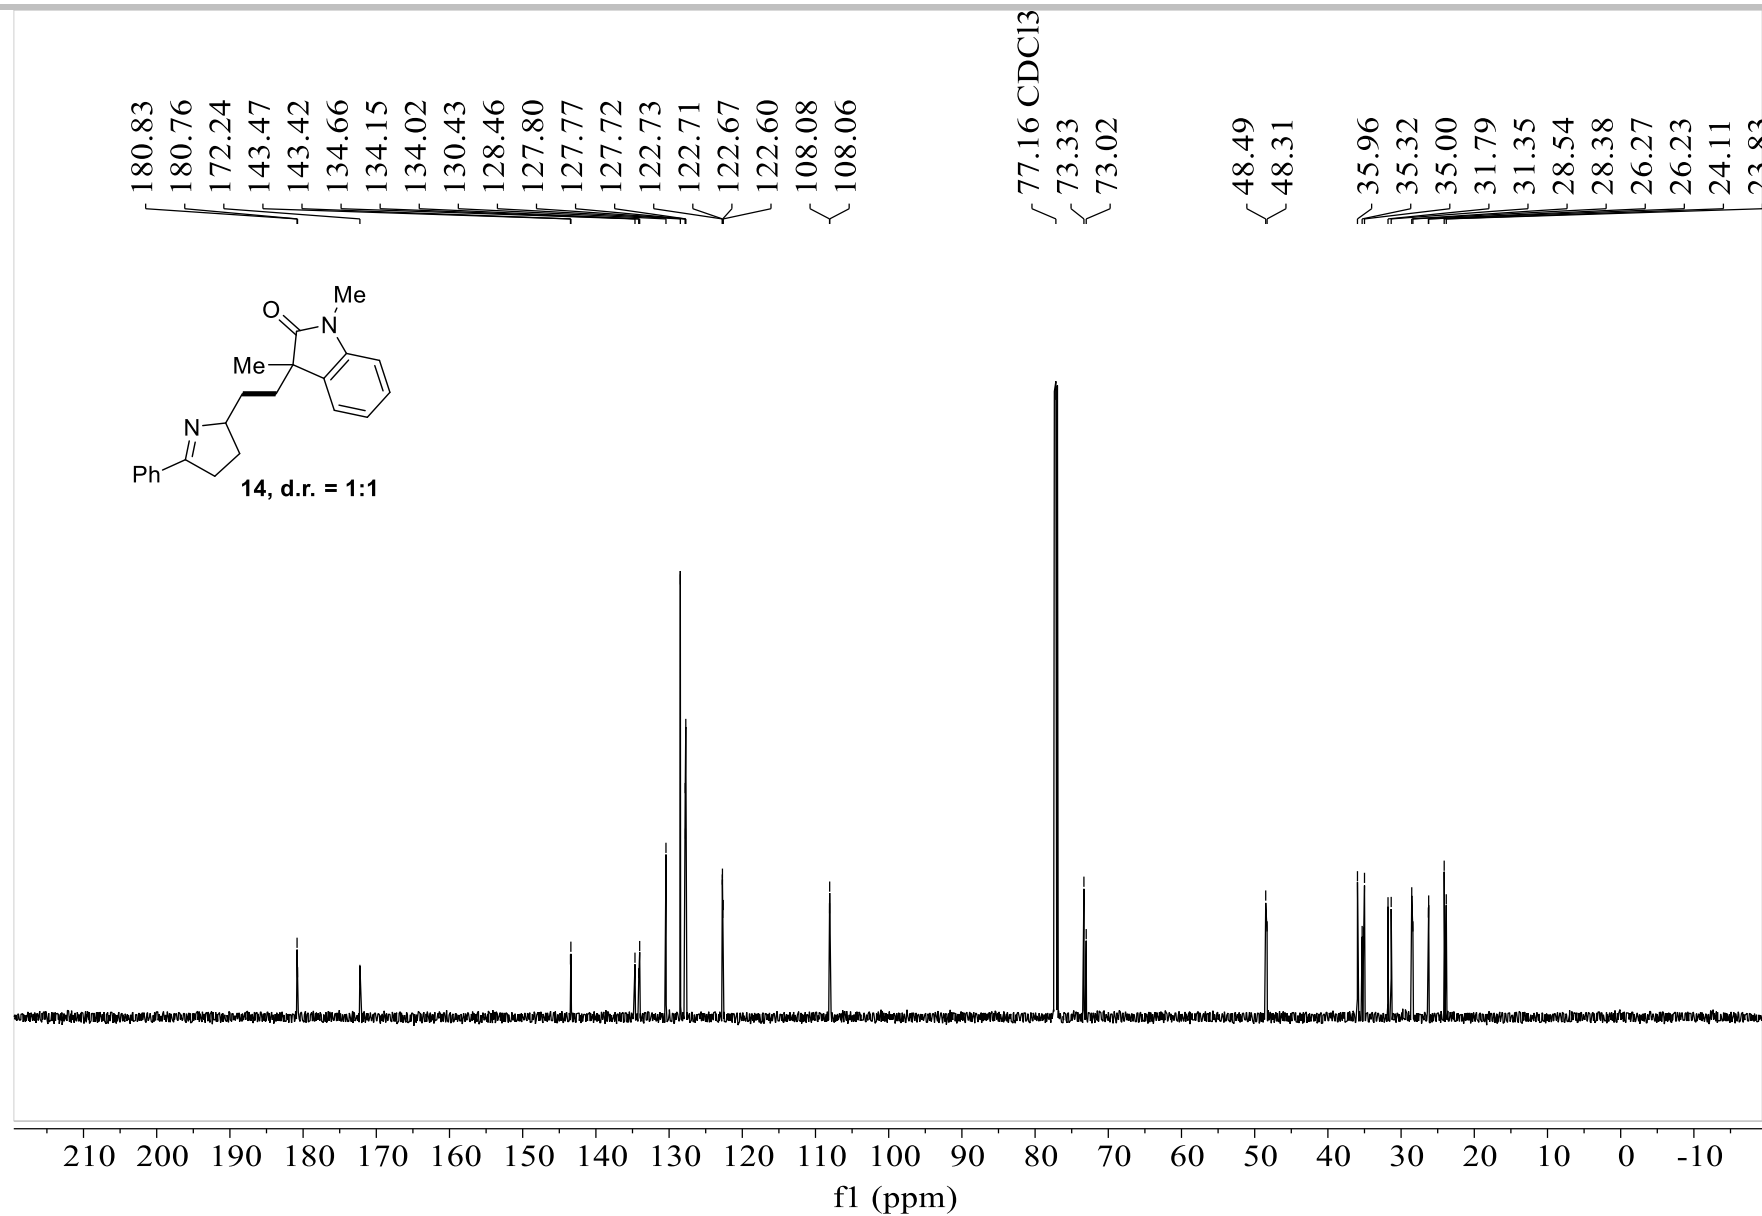

SUPPORTING INFORMATION

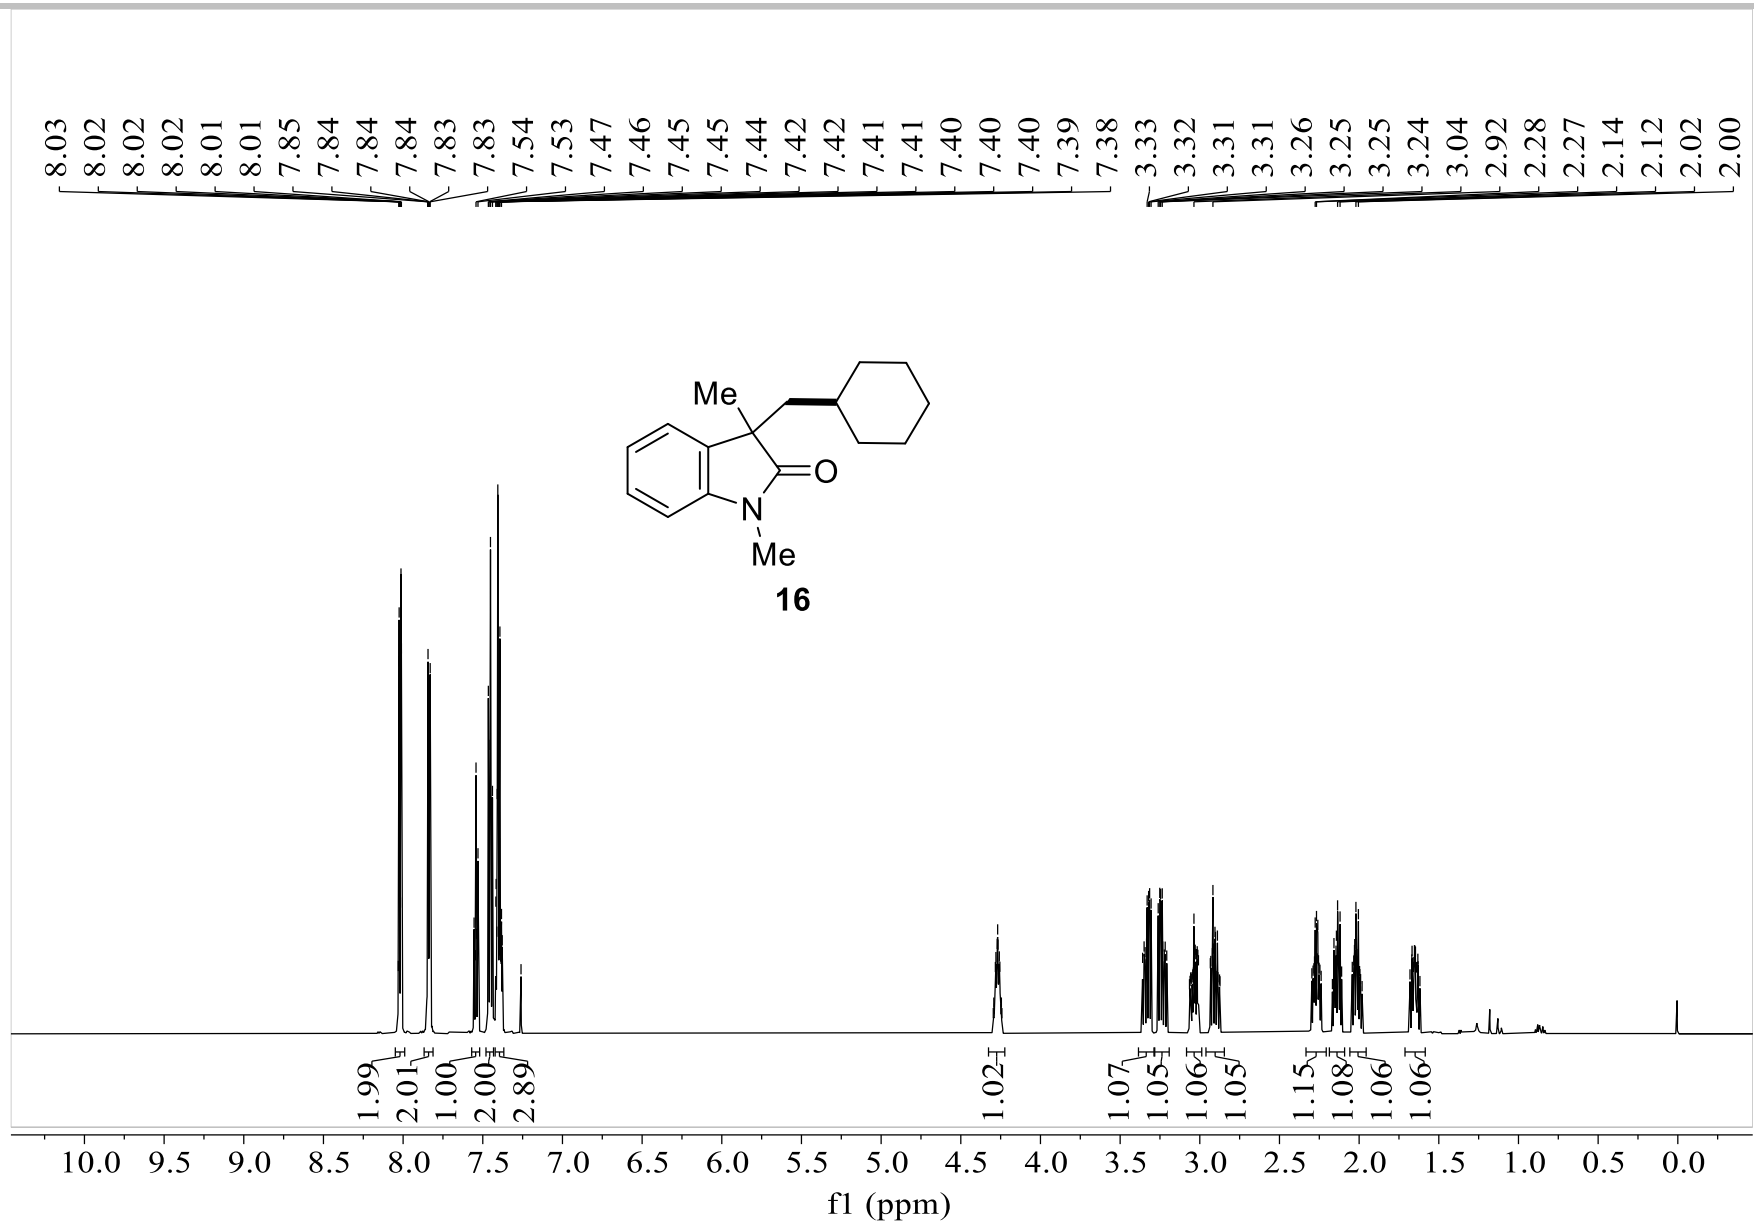

# SUPPORTING INFORMATION

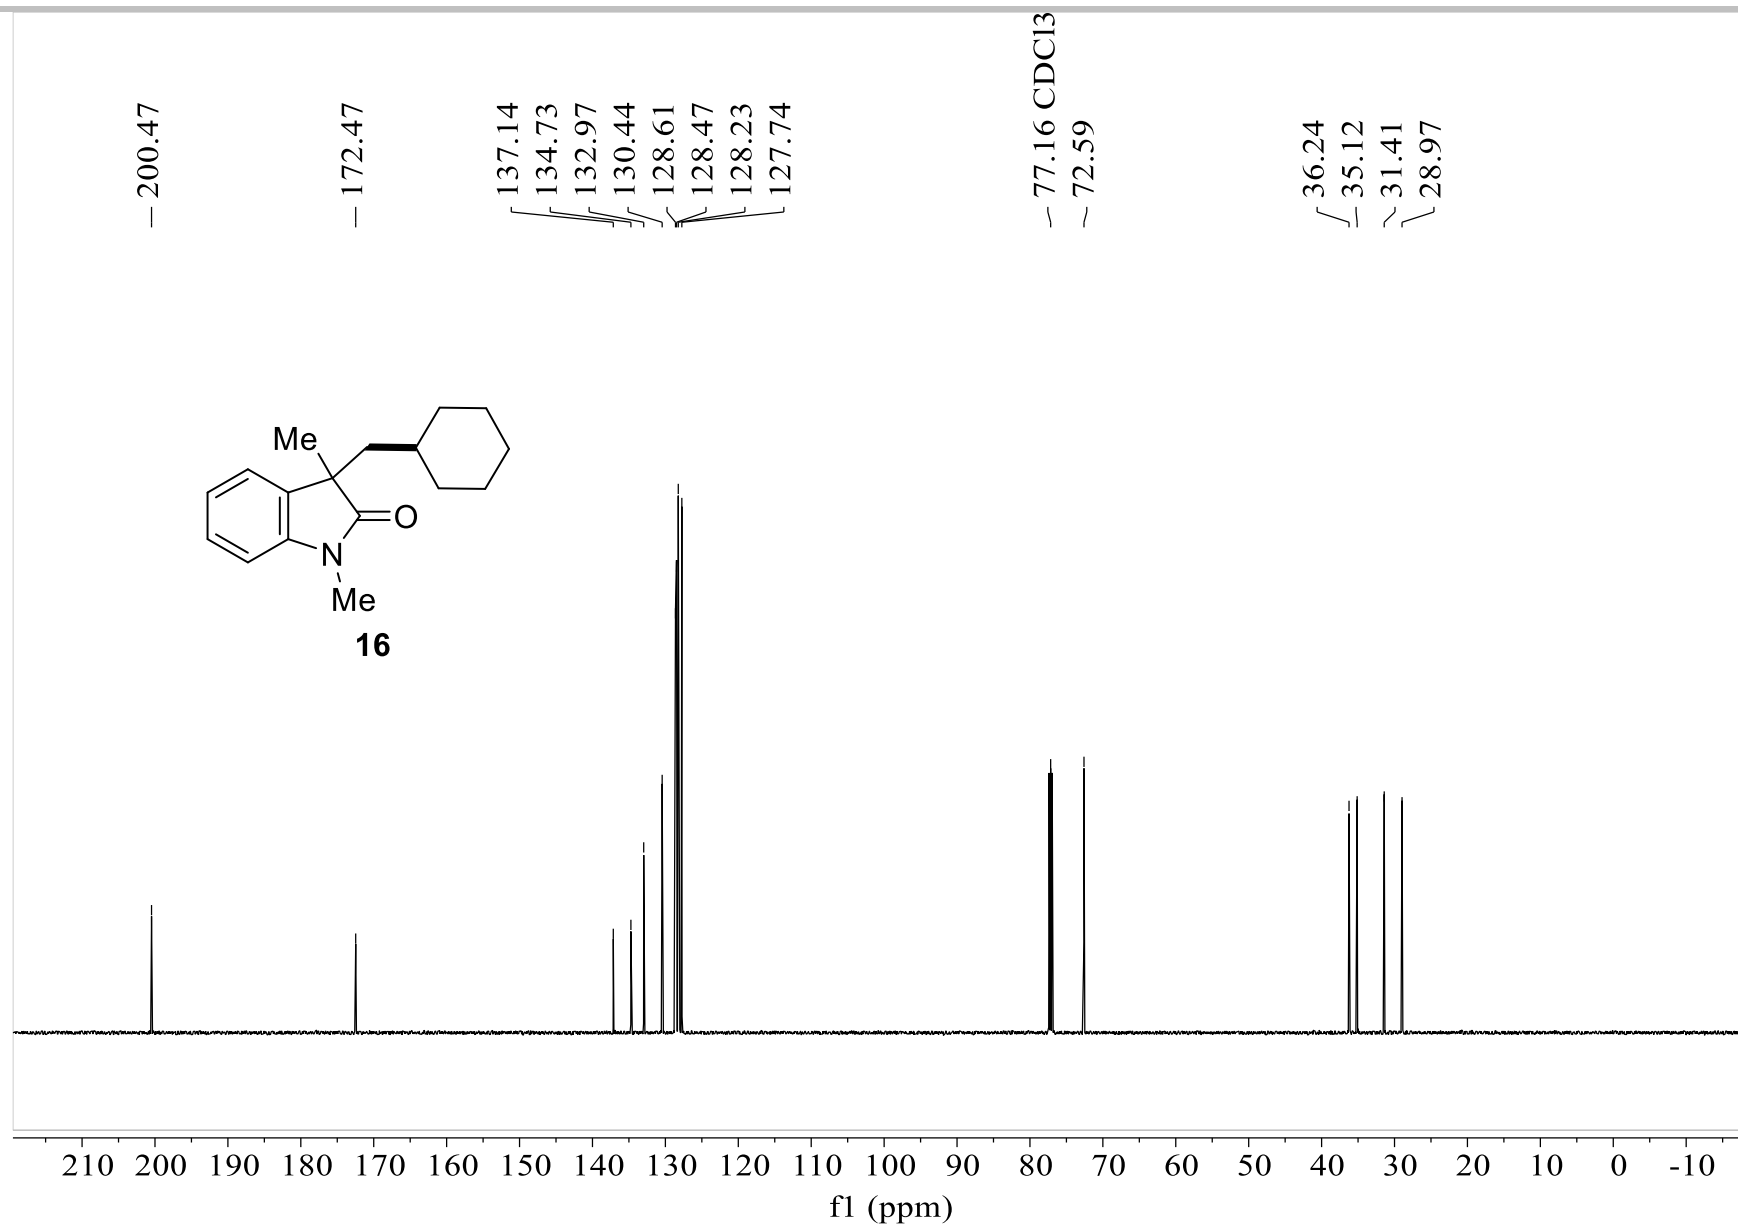

# SUPPORTING INFORMATION

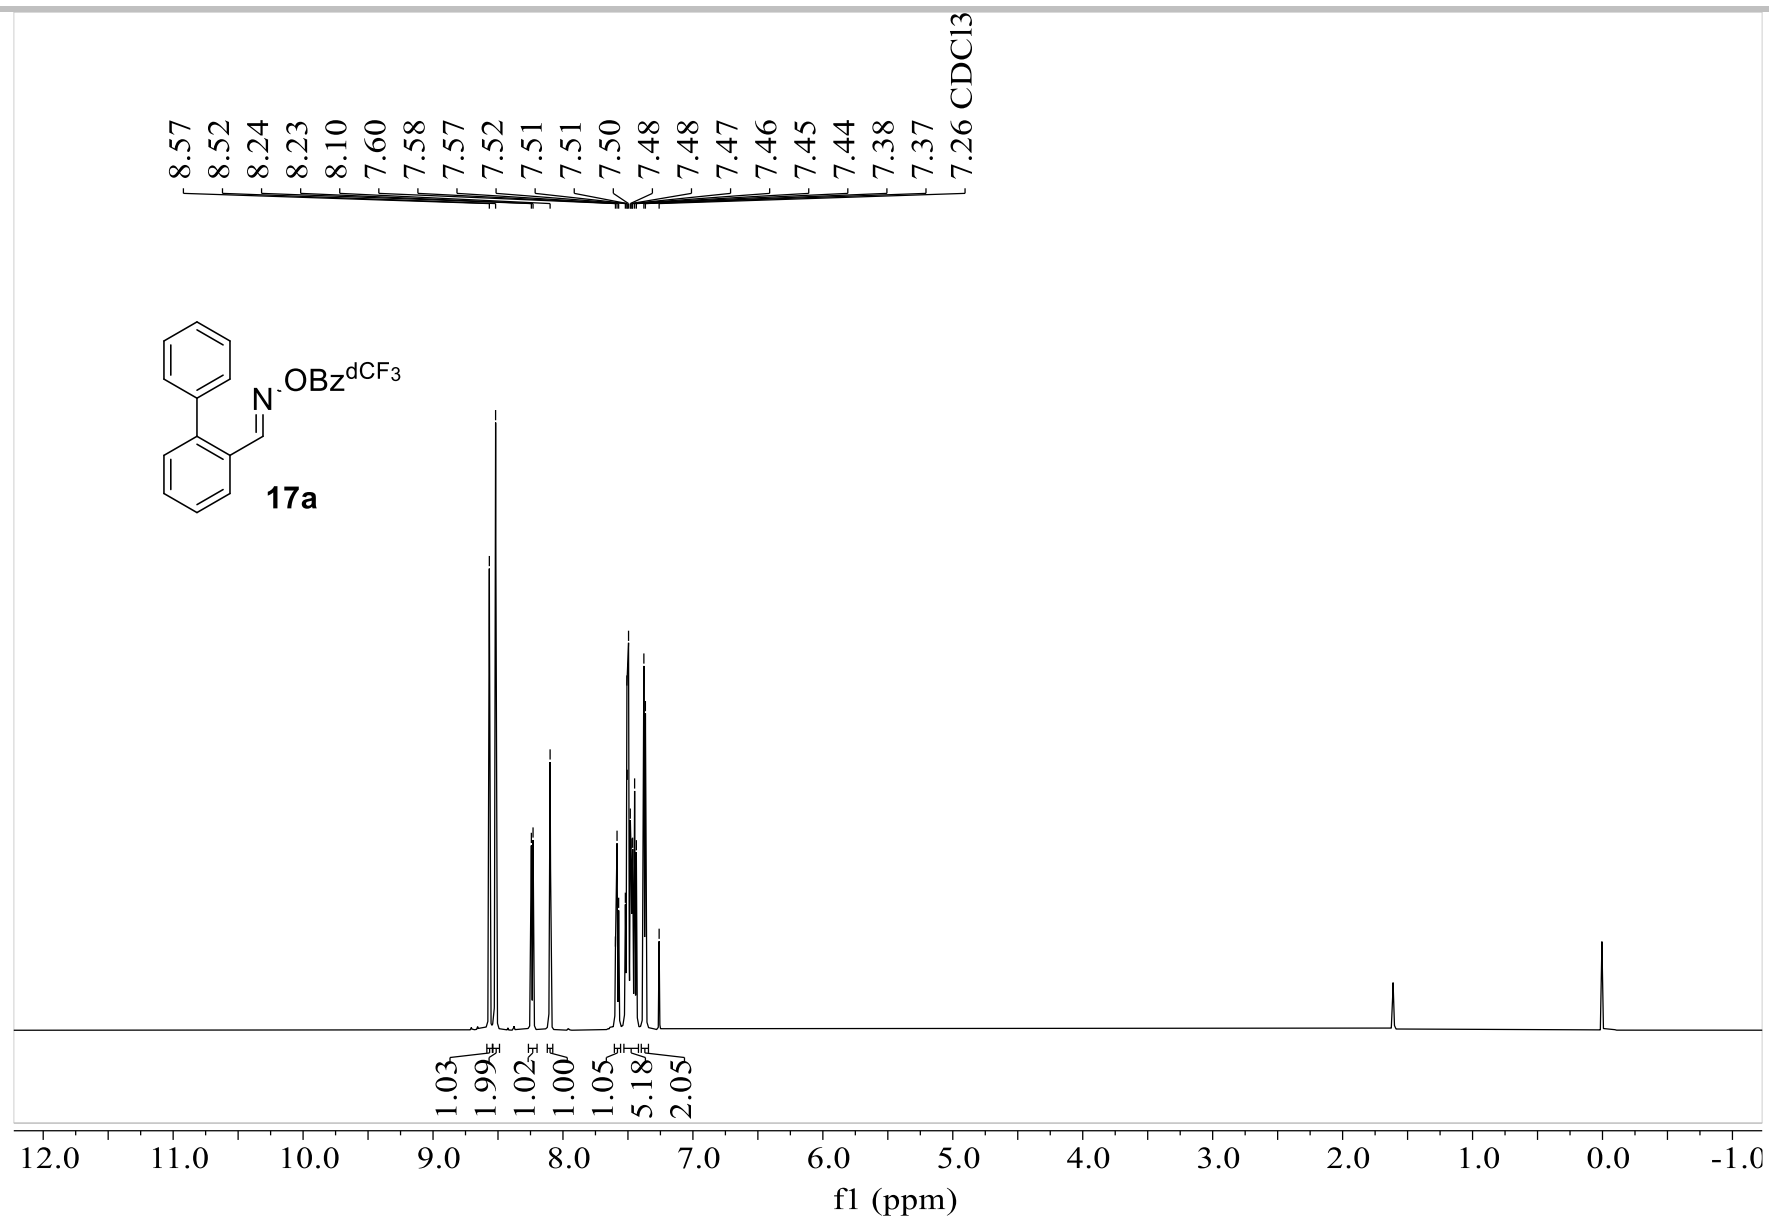



SUPPORTING INFORMATION

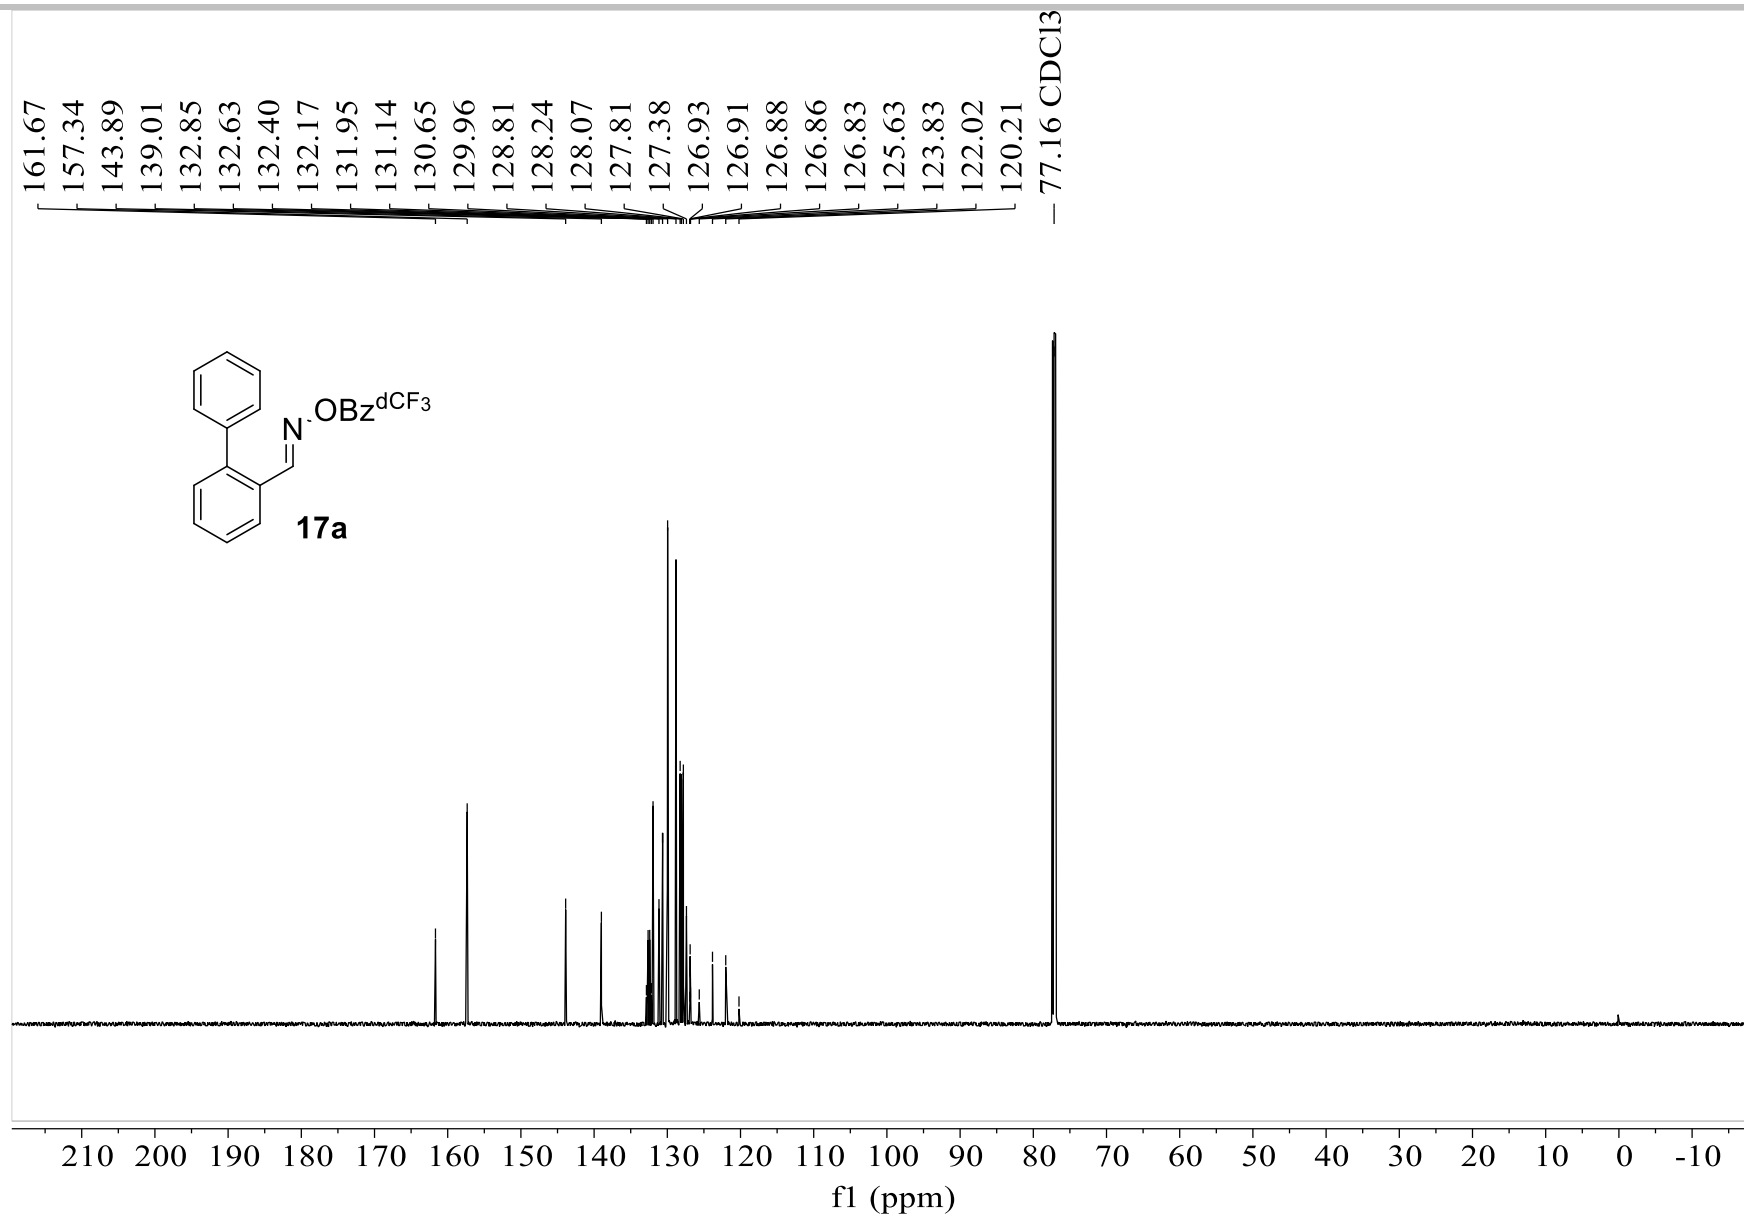

SUPPORTING INFORMATION

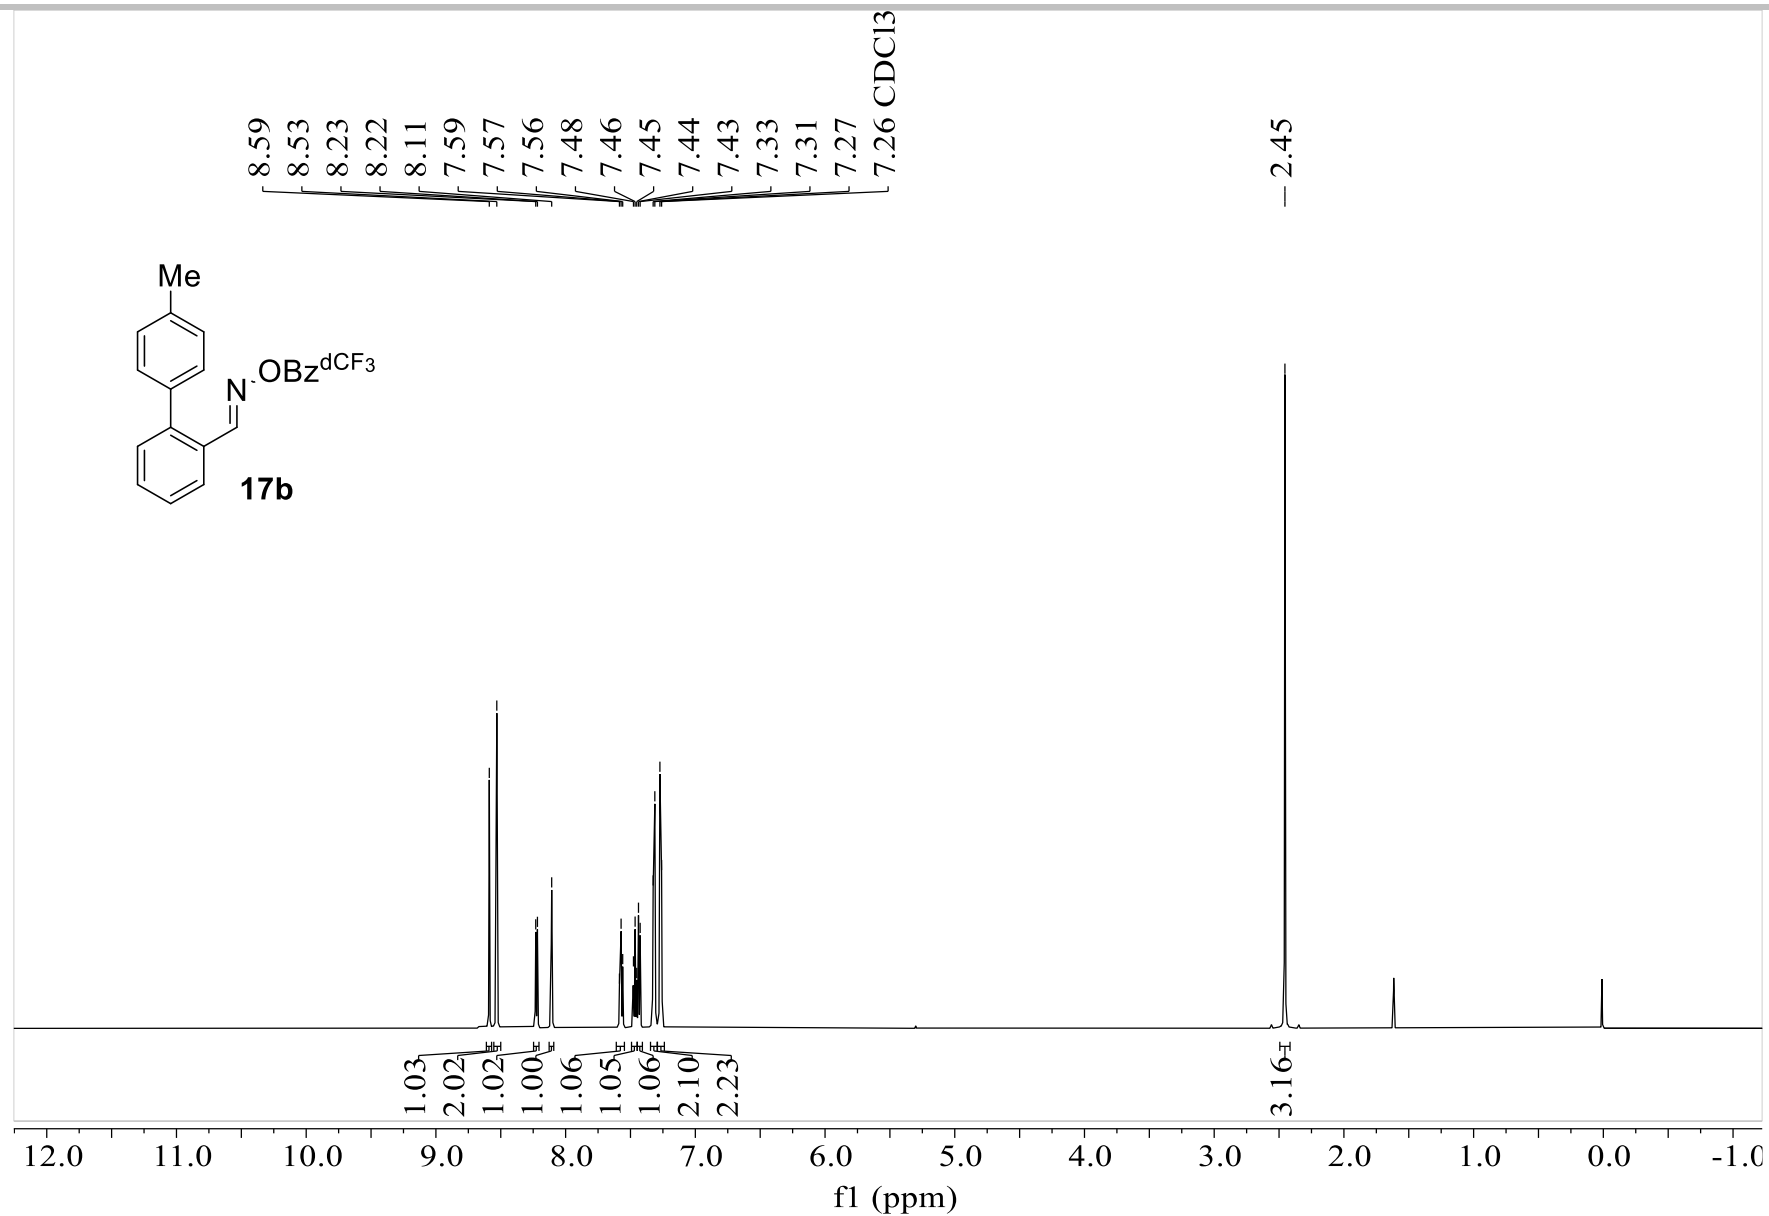

SUPPORTING INFORMATION

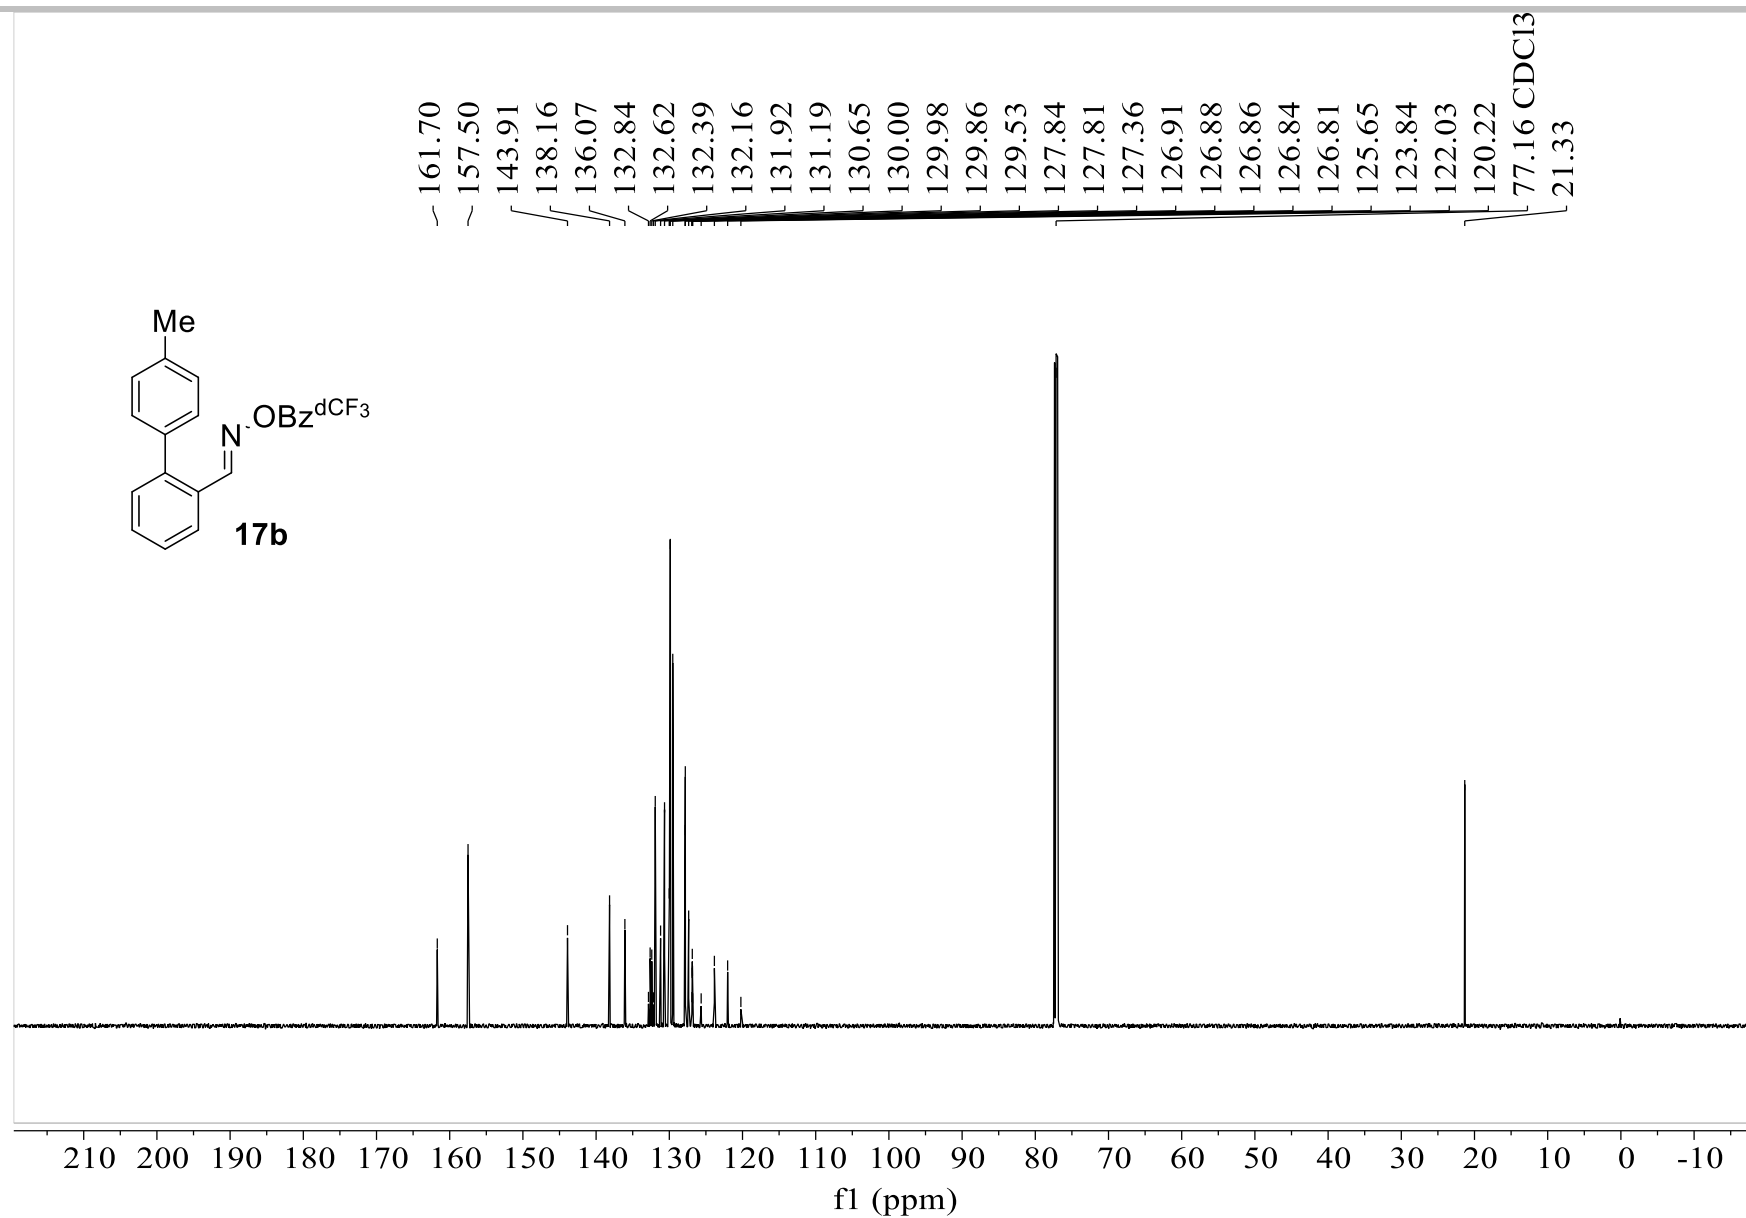

SUPPORTING INFORMATION

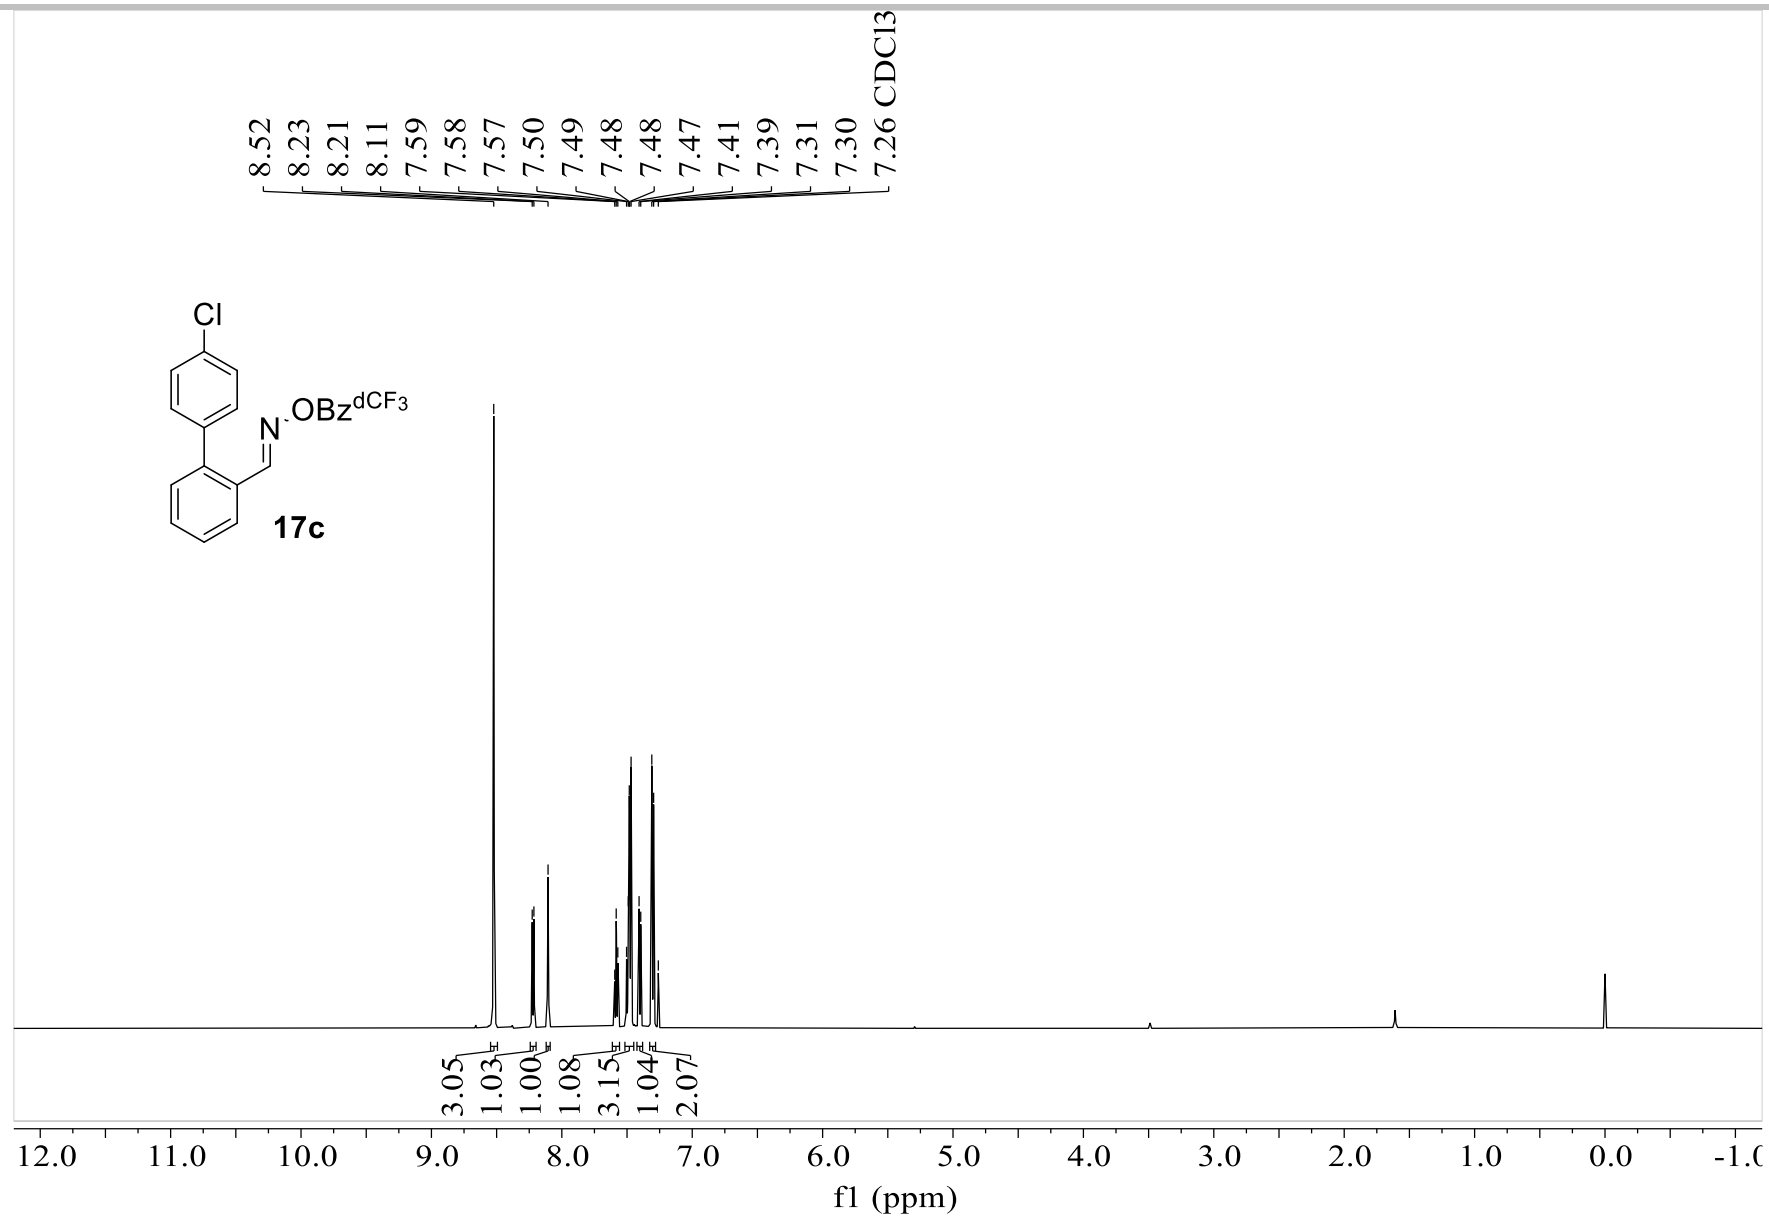

SUPPORTING INFORMATION

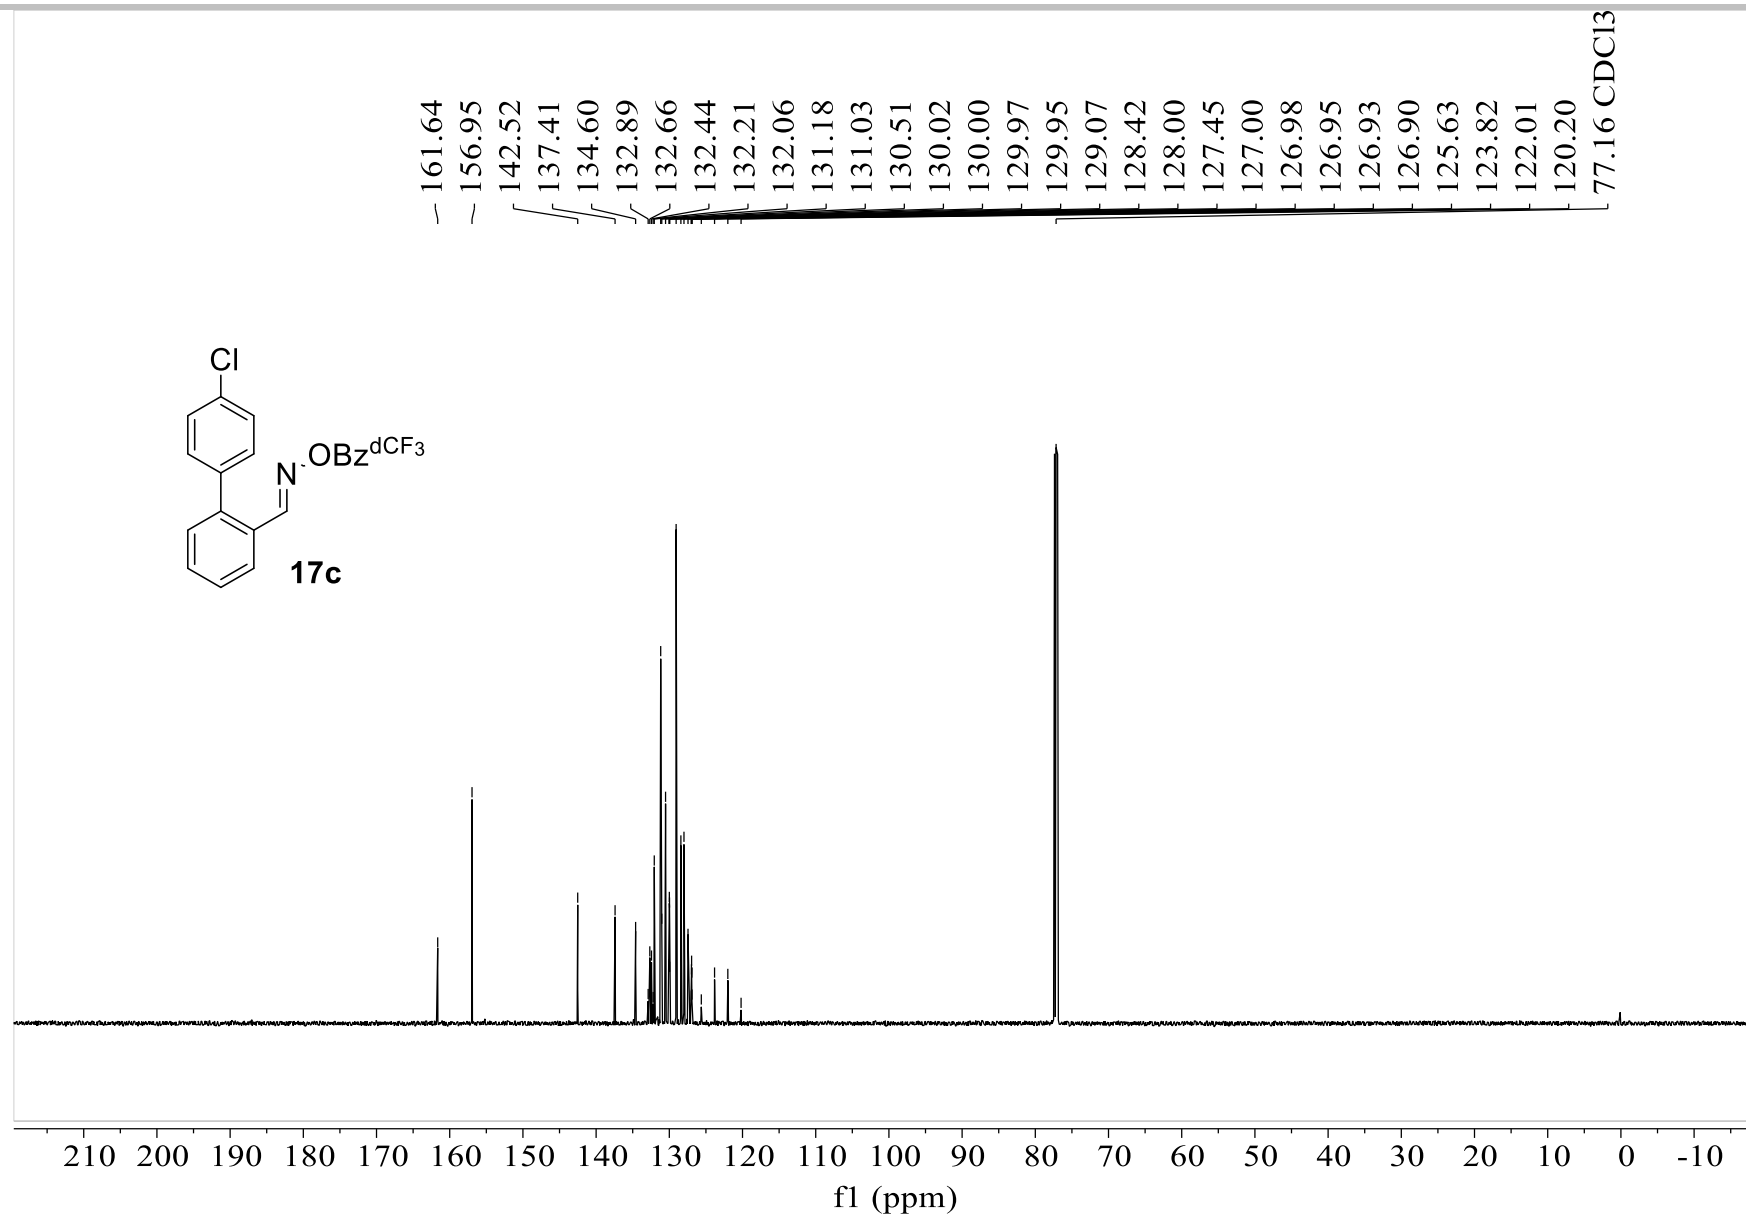

SUPPORTING INFORMATION

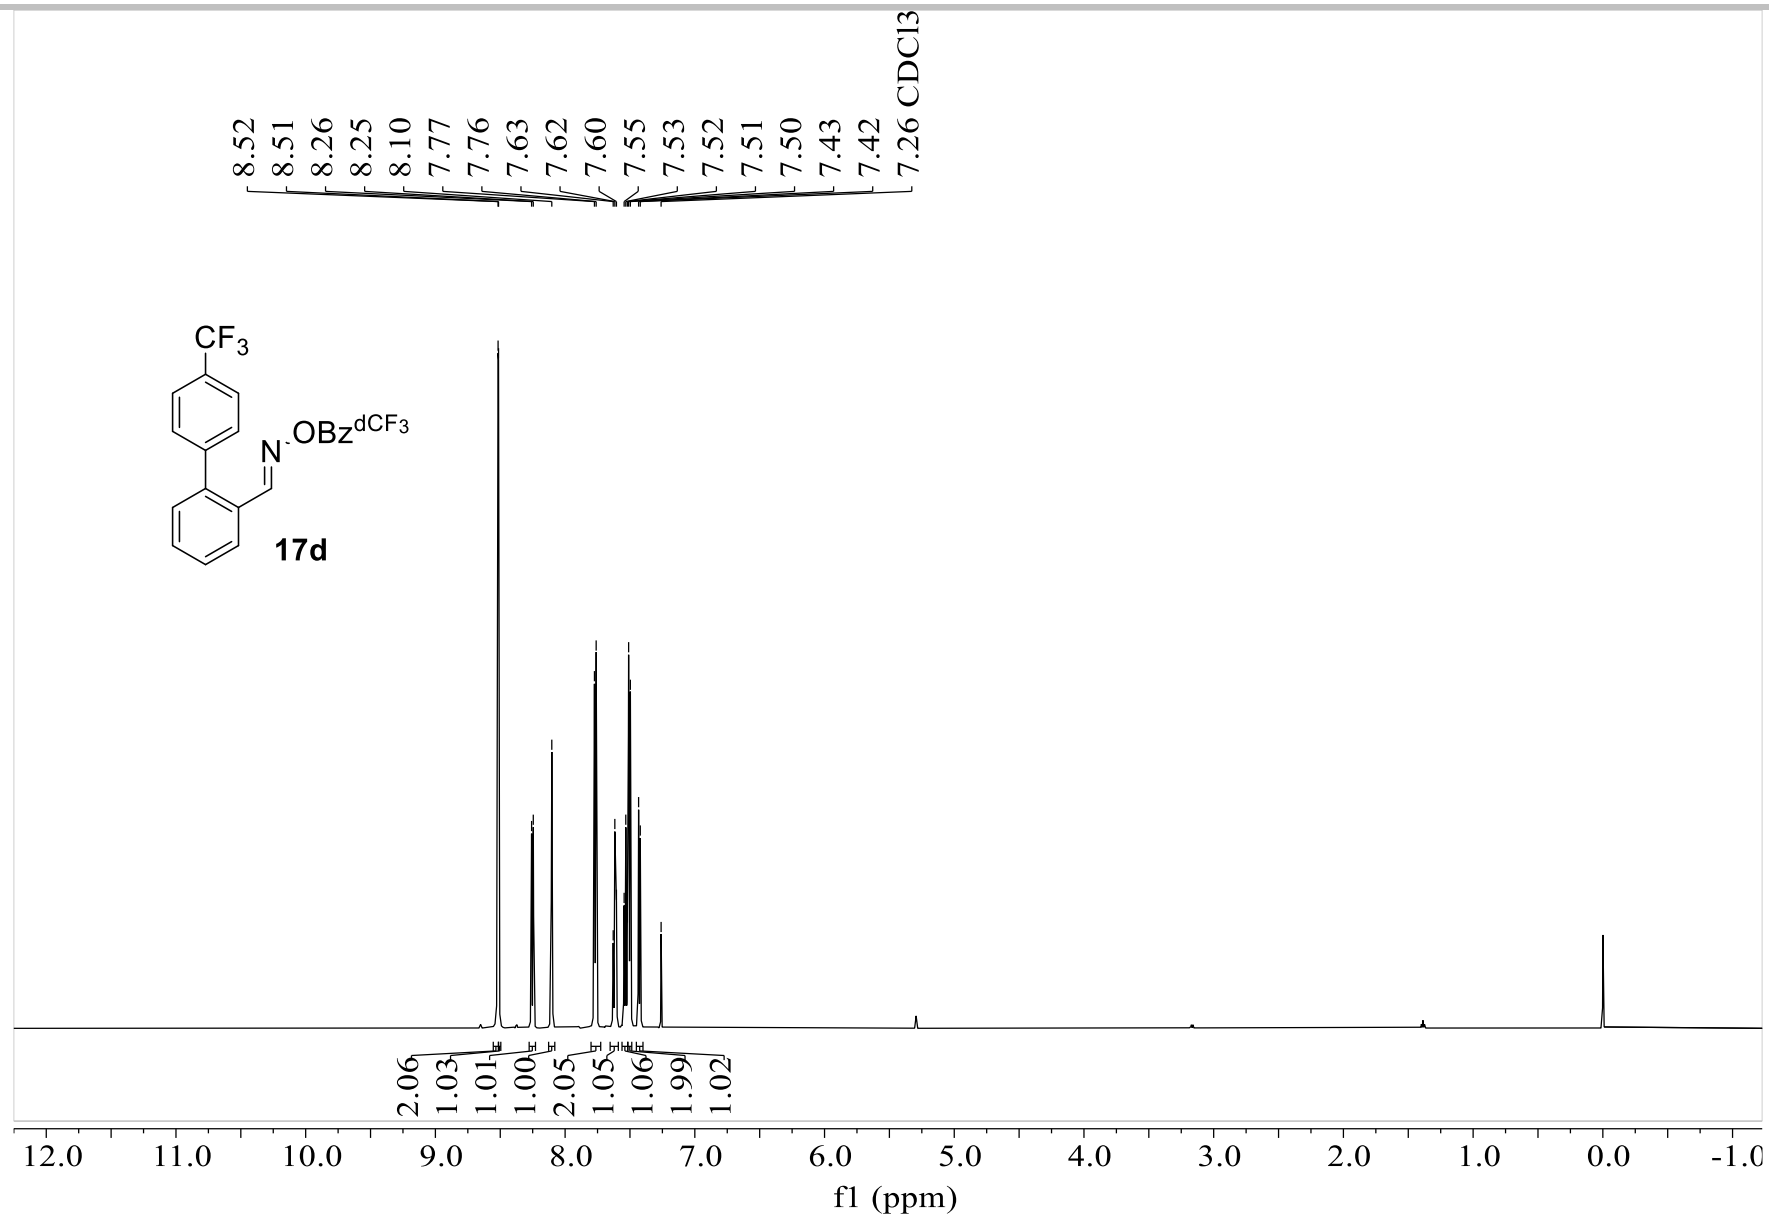

SUPPORTING INFORMATION

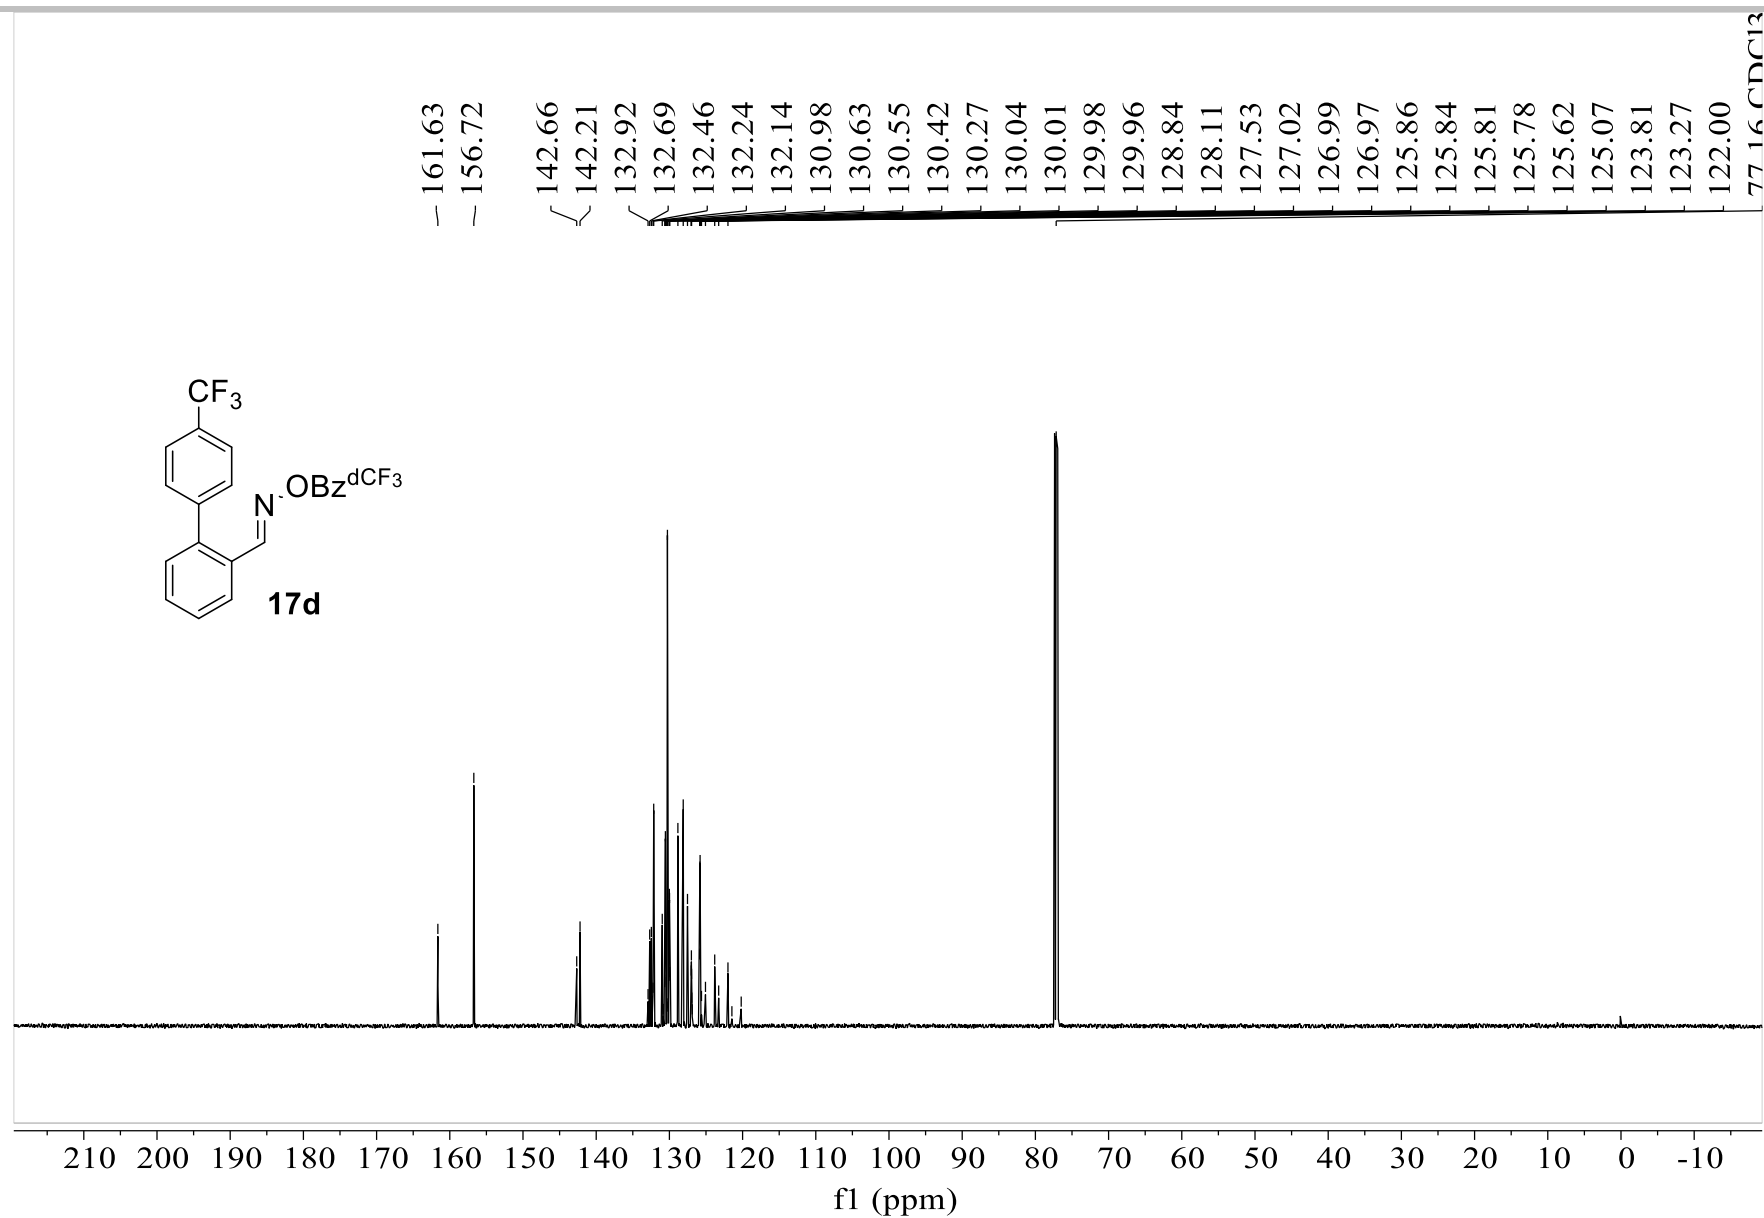

SUPPORTING INFORMATION

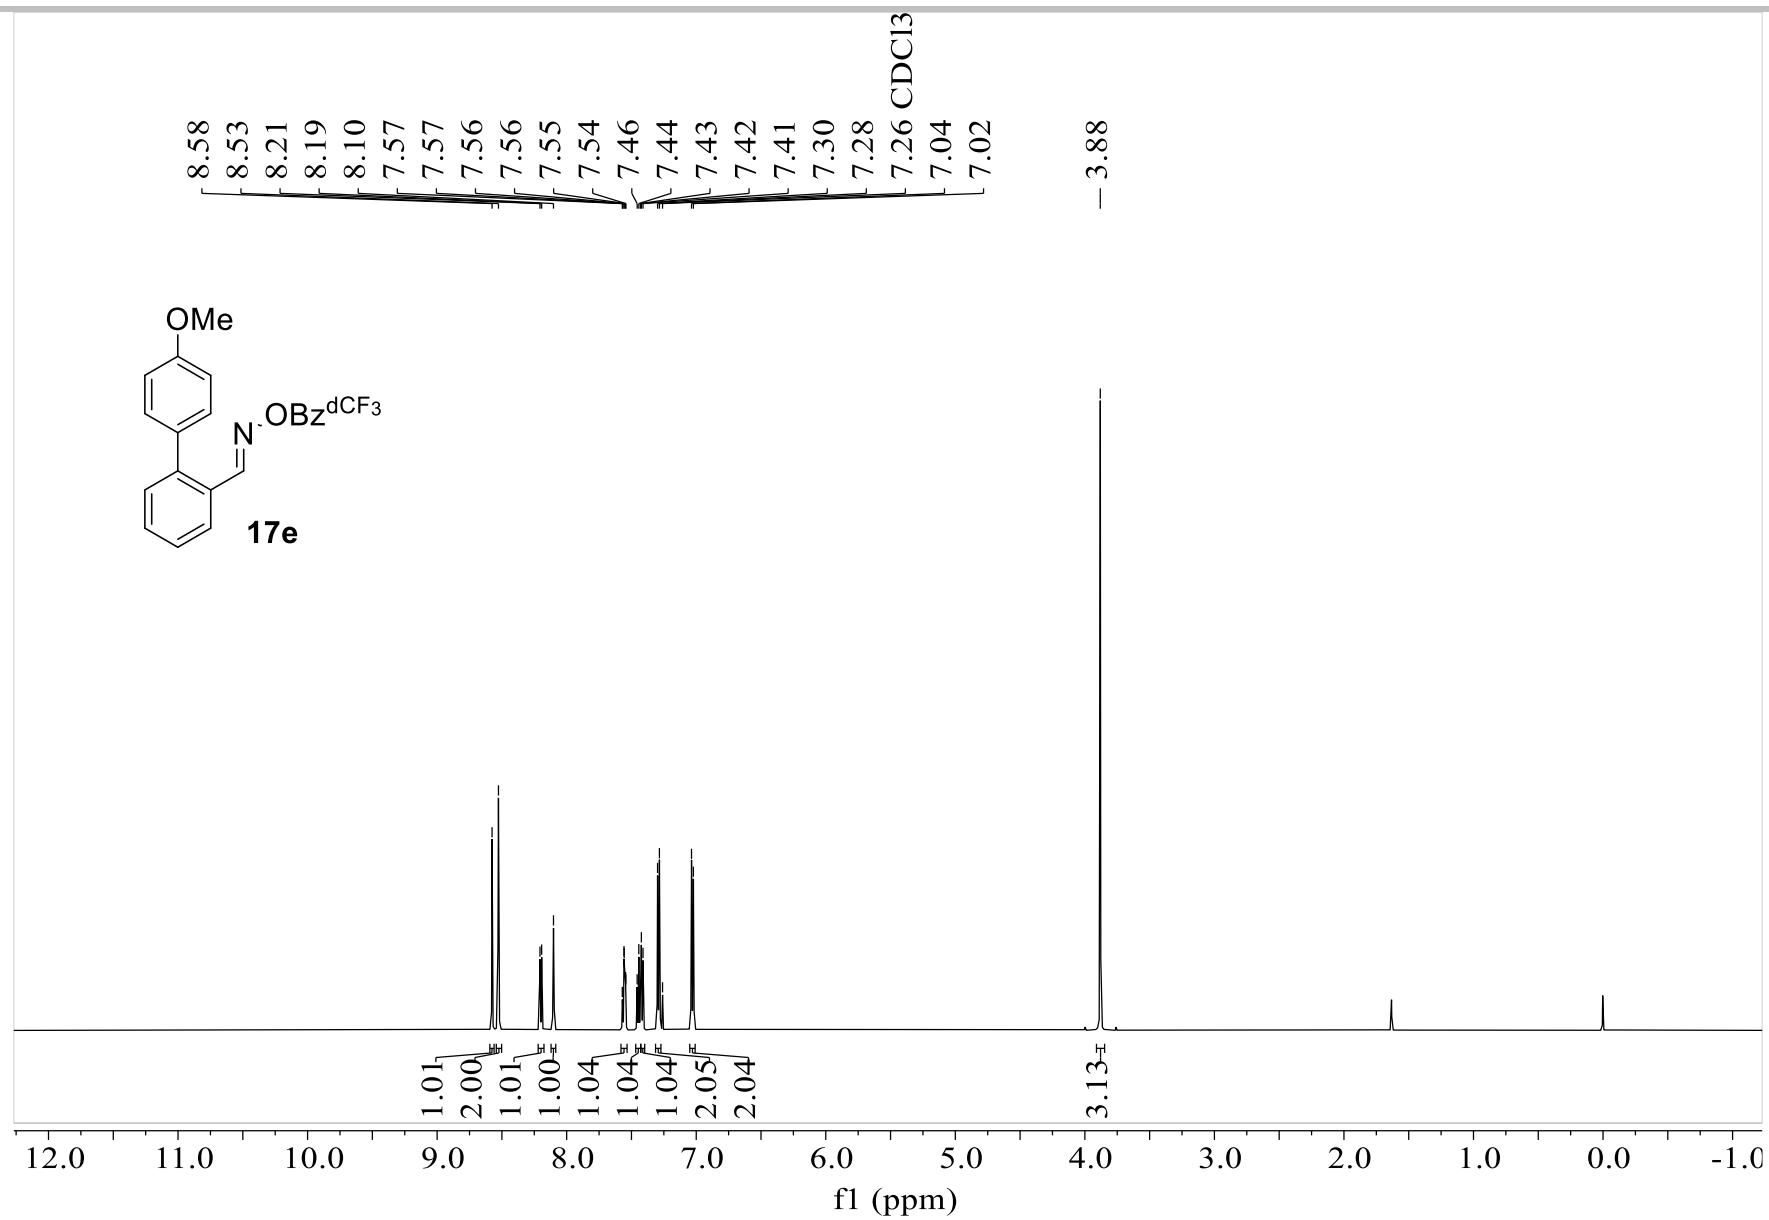



SUPPORTING INFORMATION

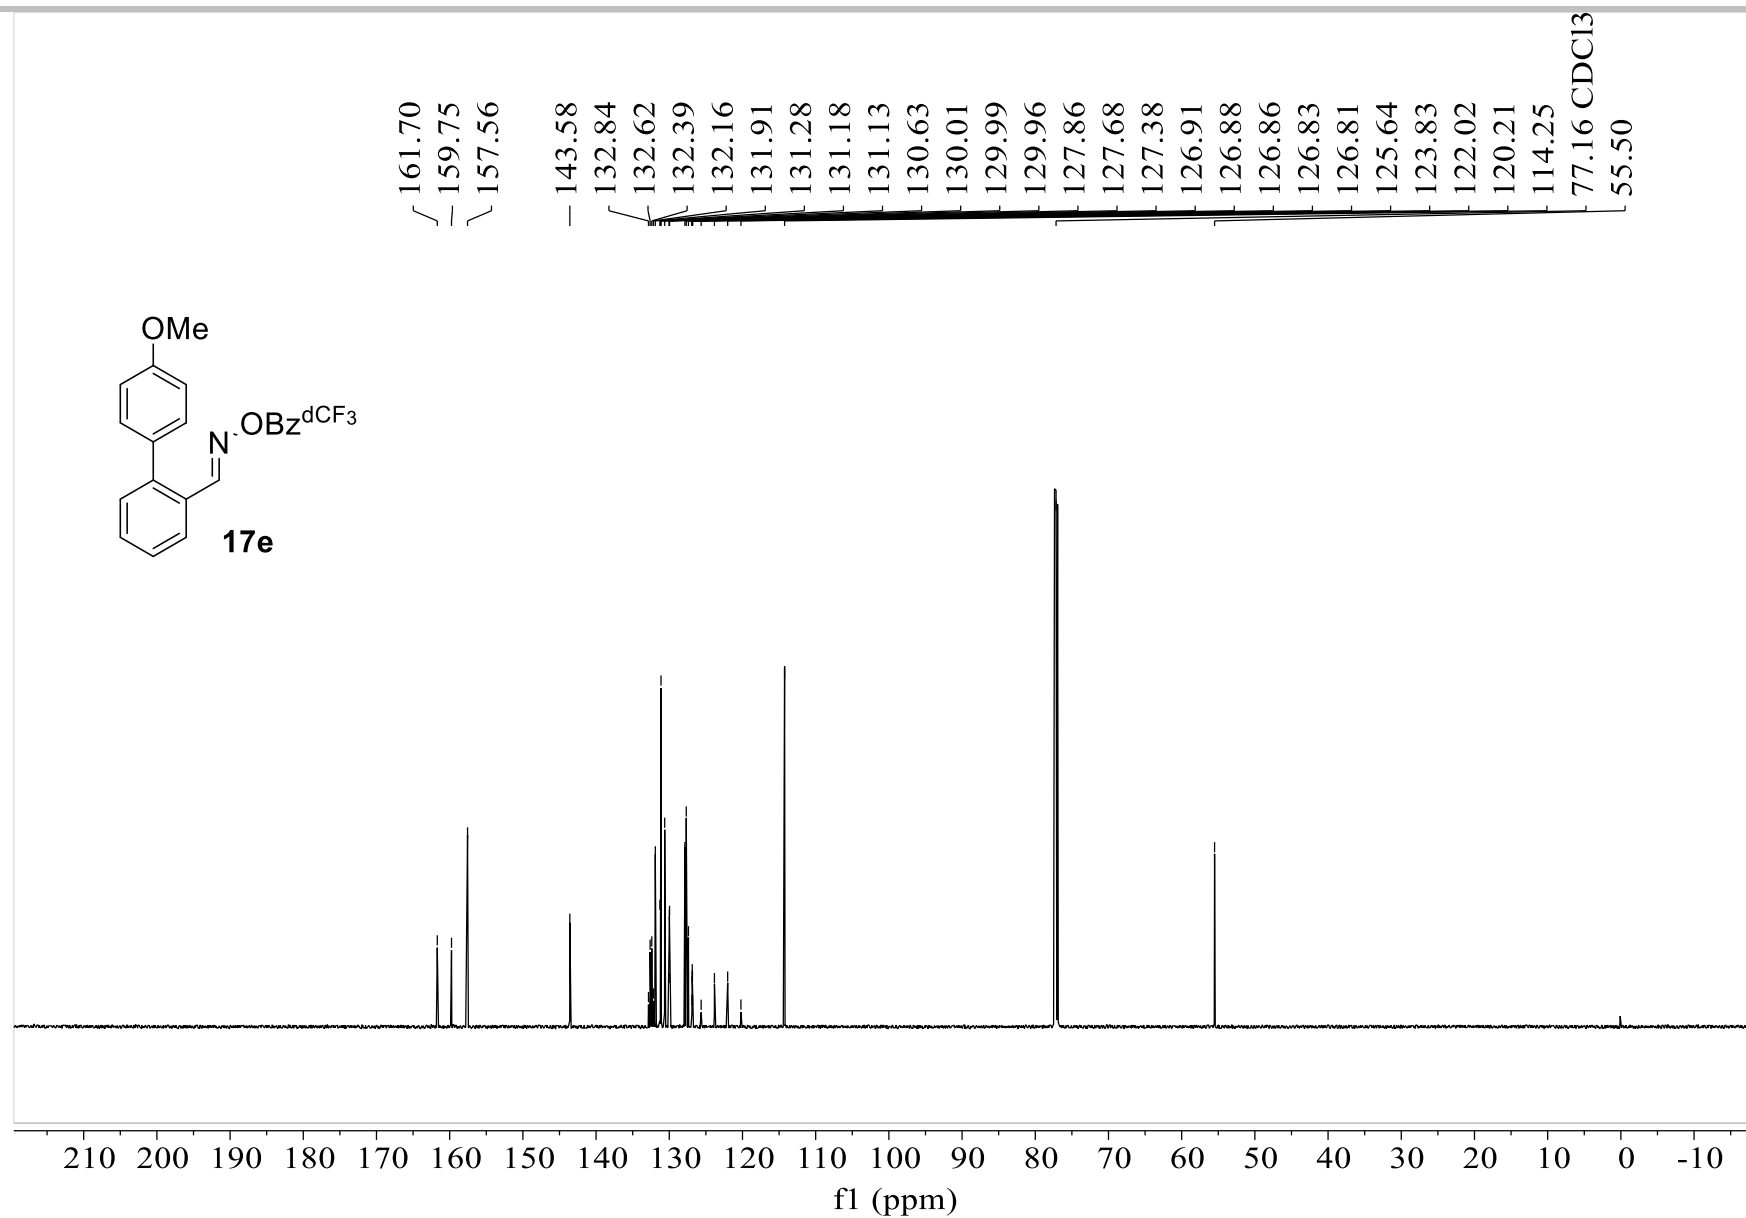

# SUPPORTING INFORMATION

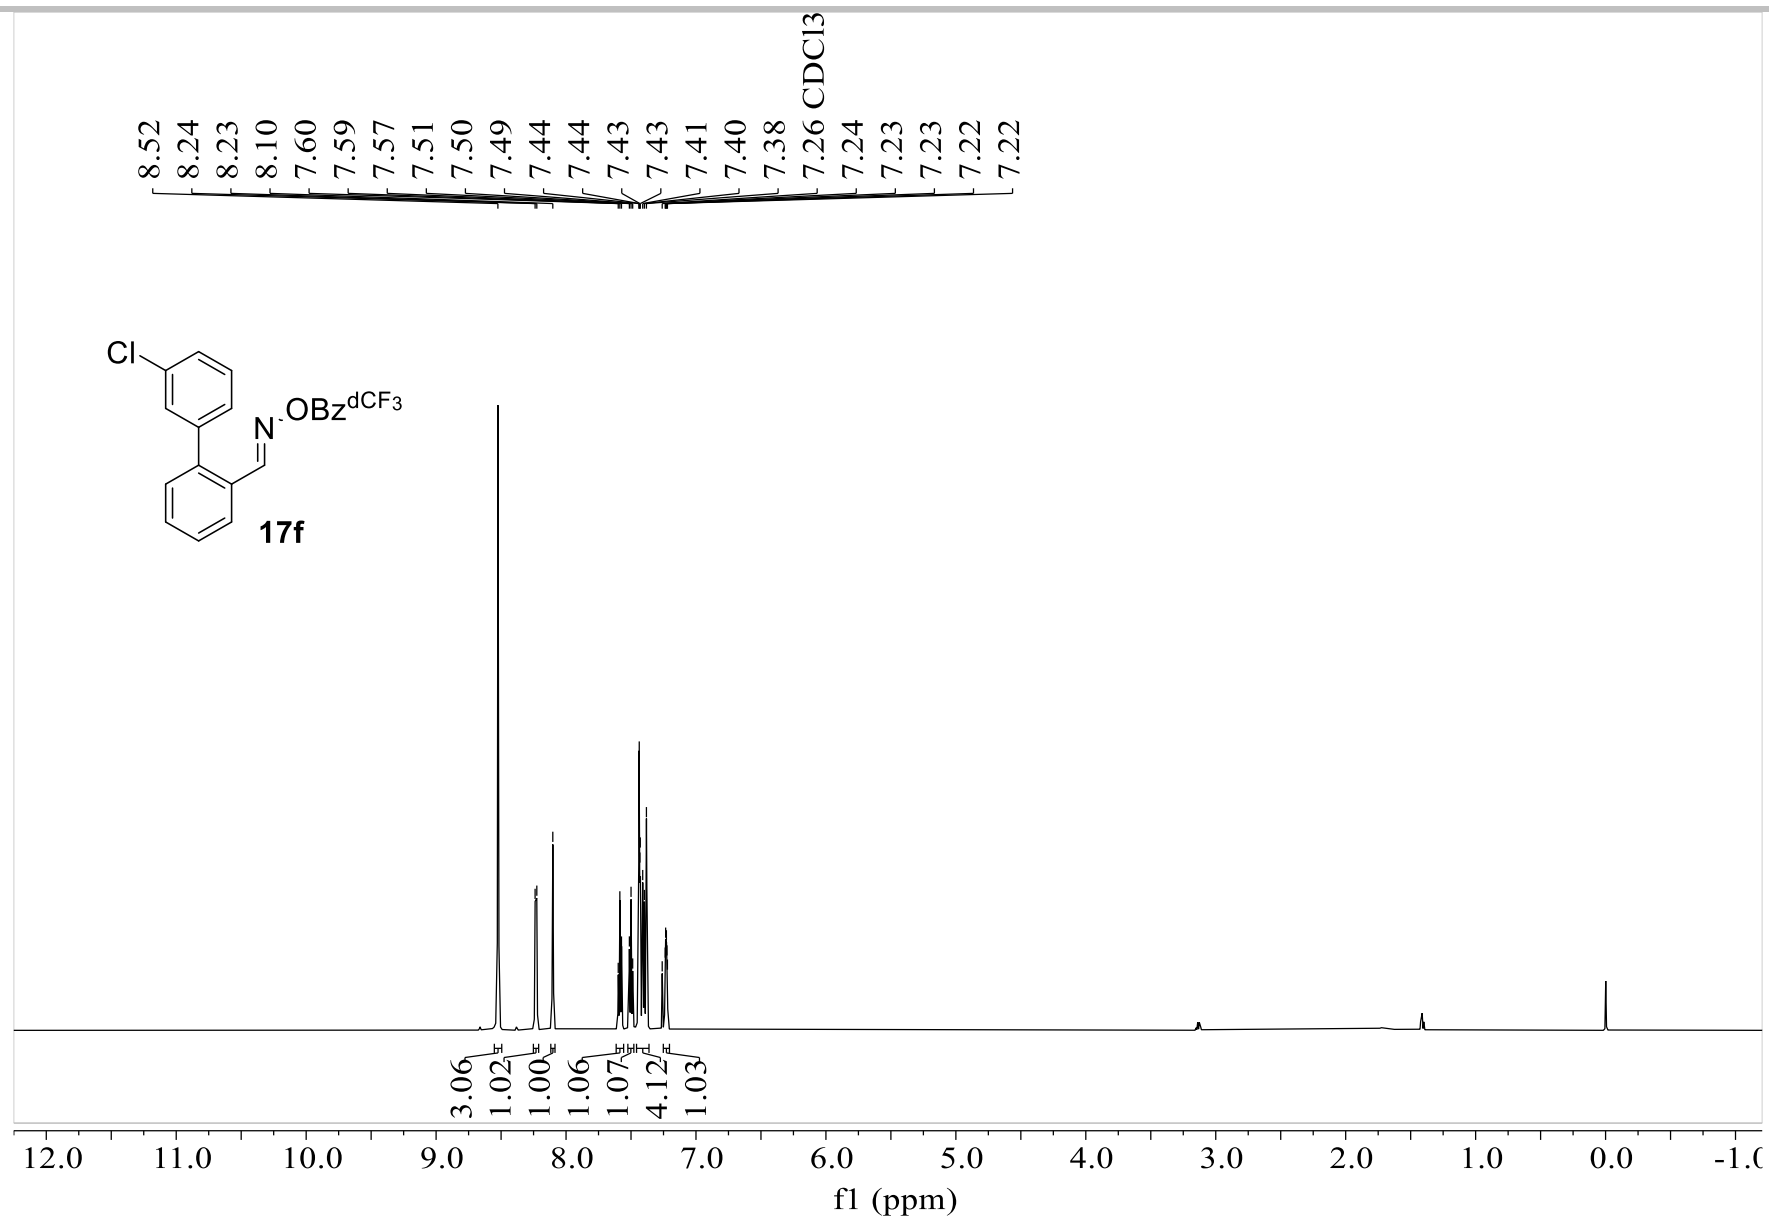

# SUPPORTING INFORMATION

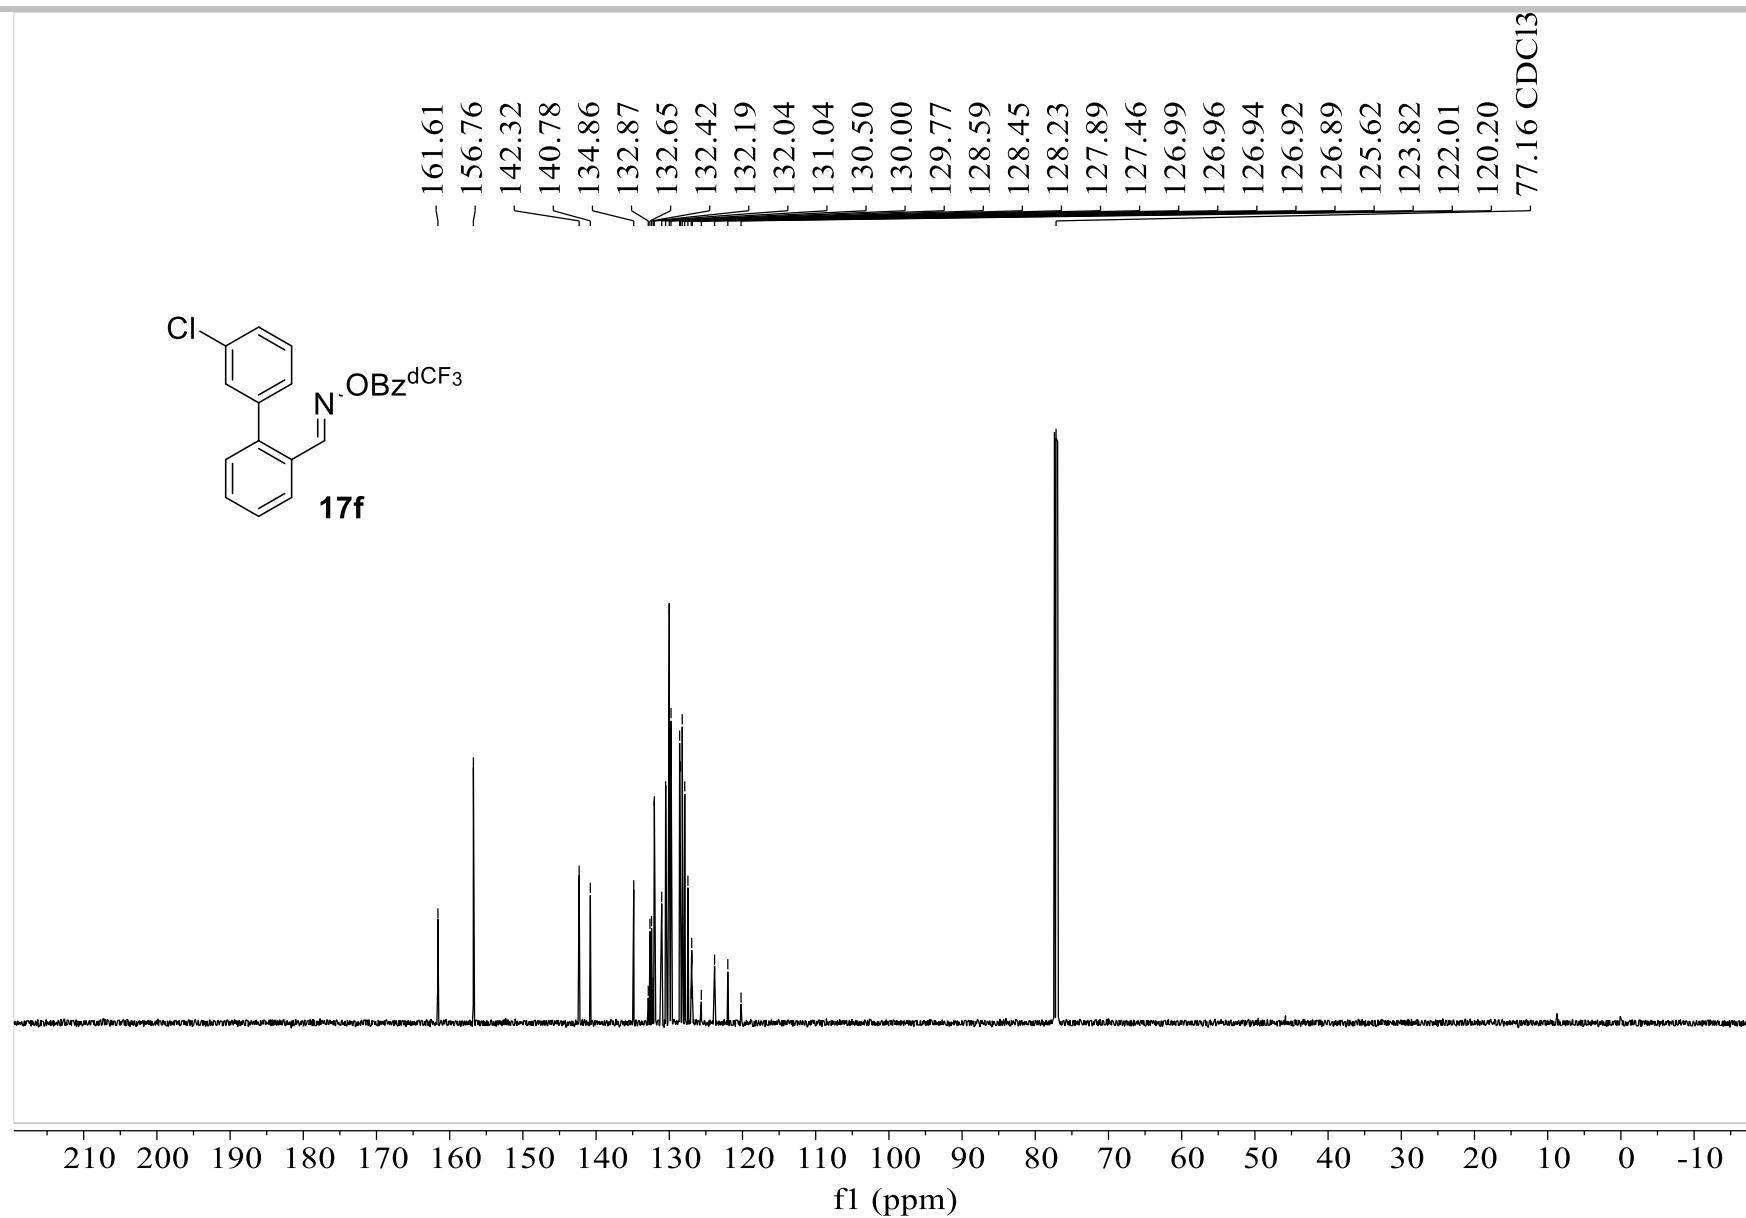

SUPPORTING INFORMATION

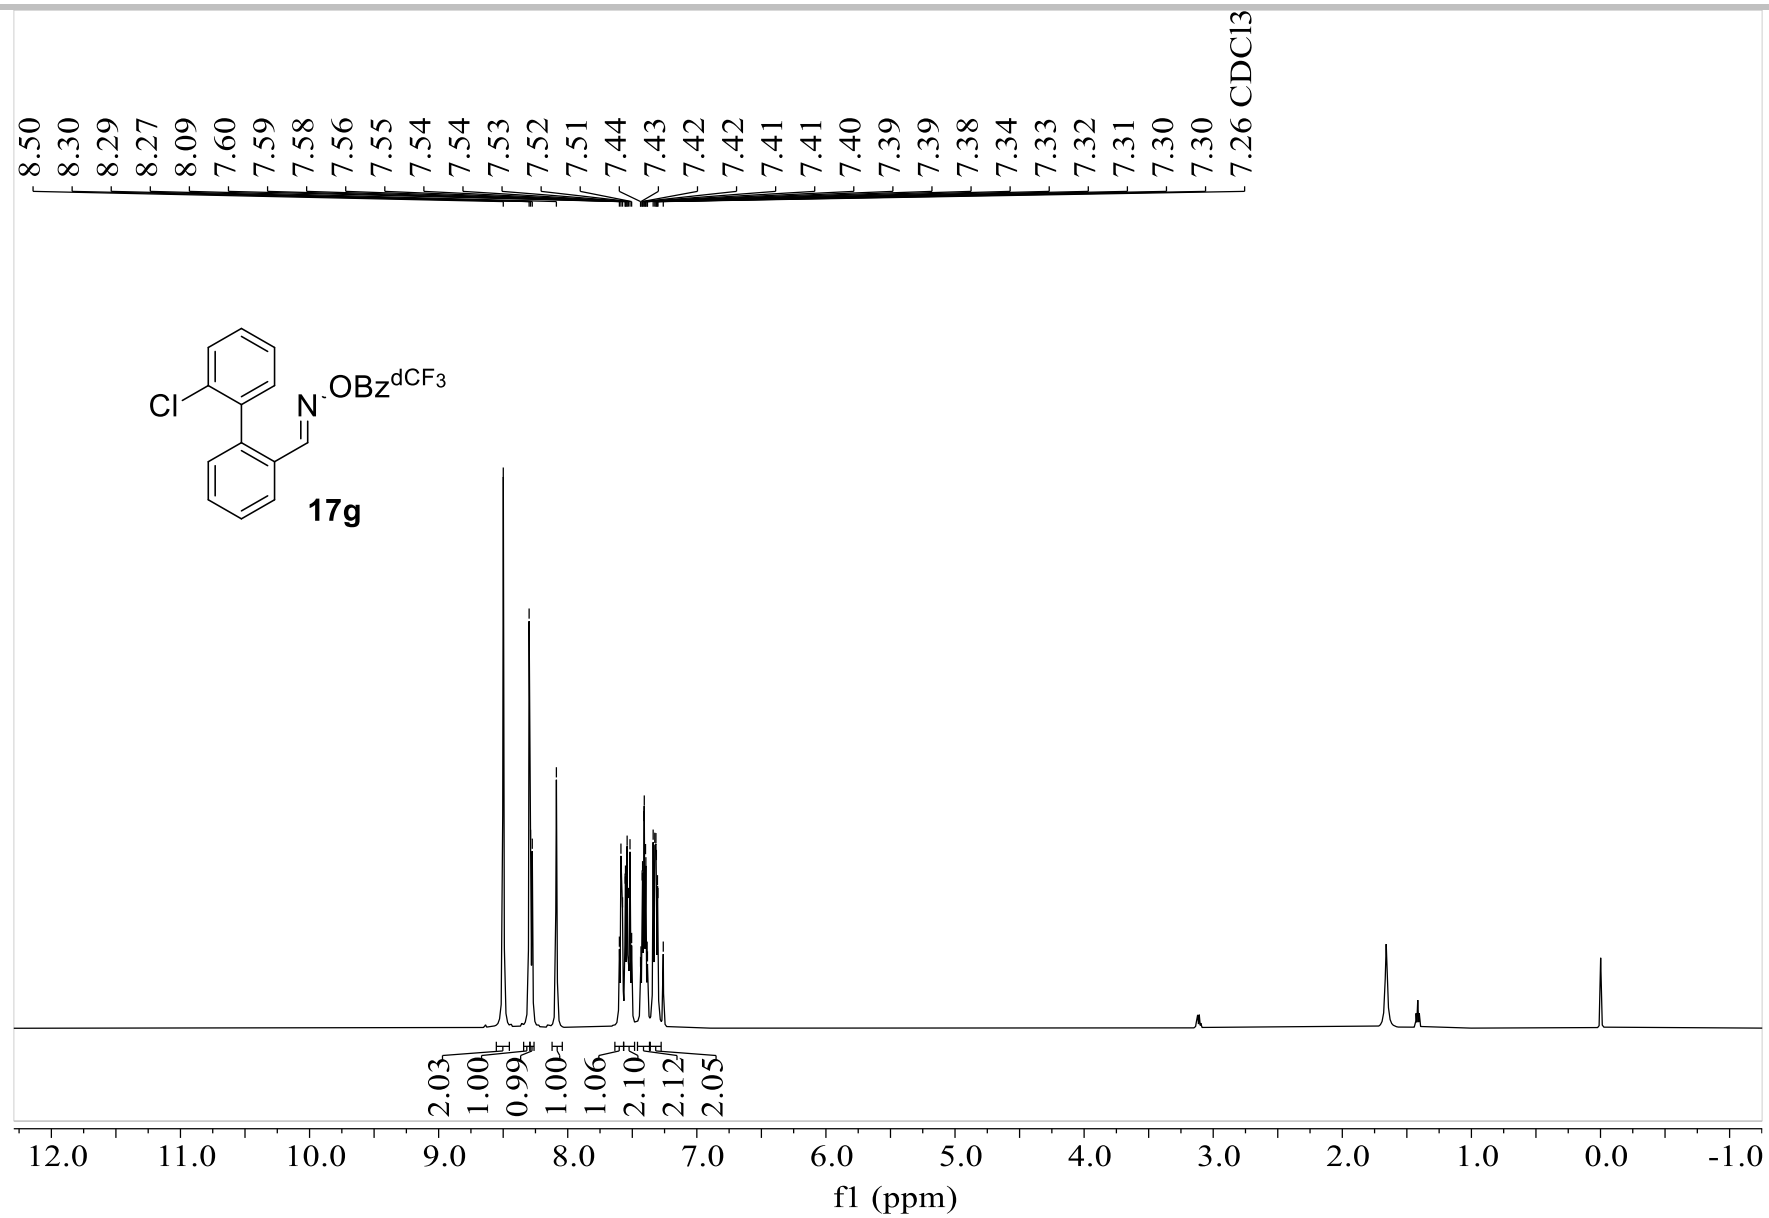

# SUPPORTING INFORMATION

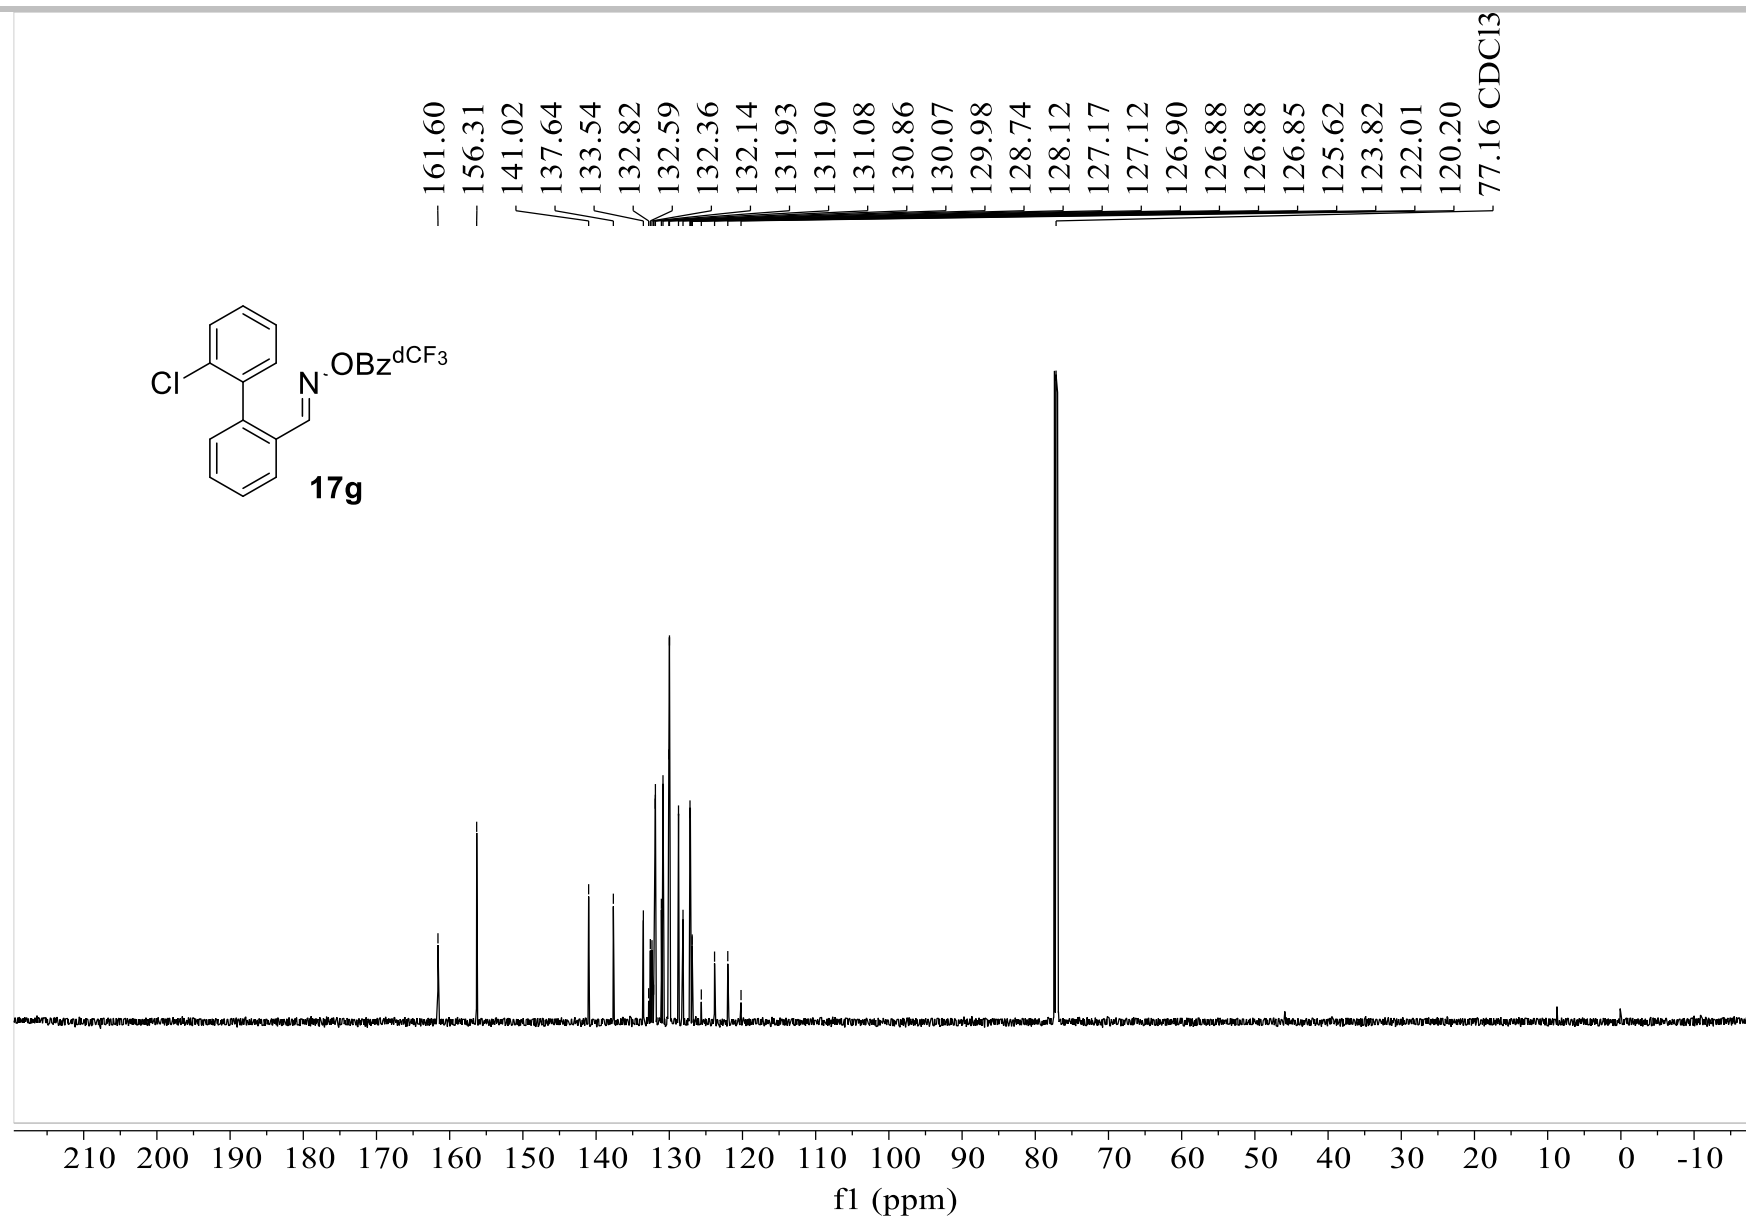

SUPPORTING INFORMATION

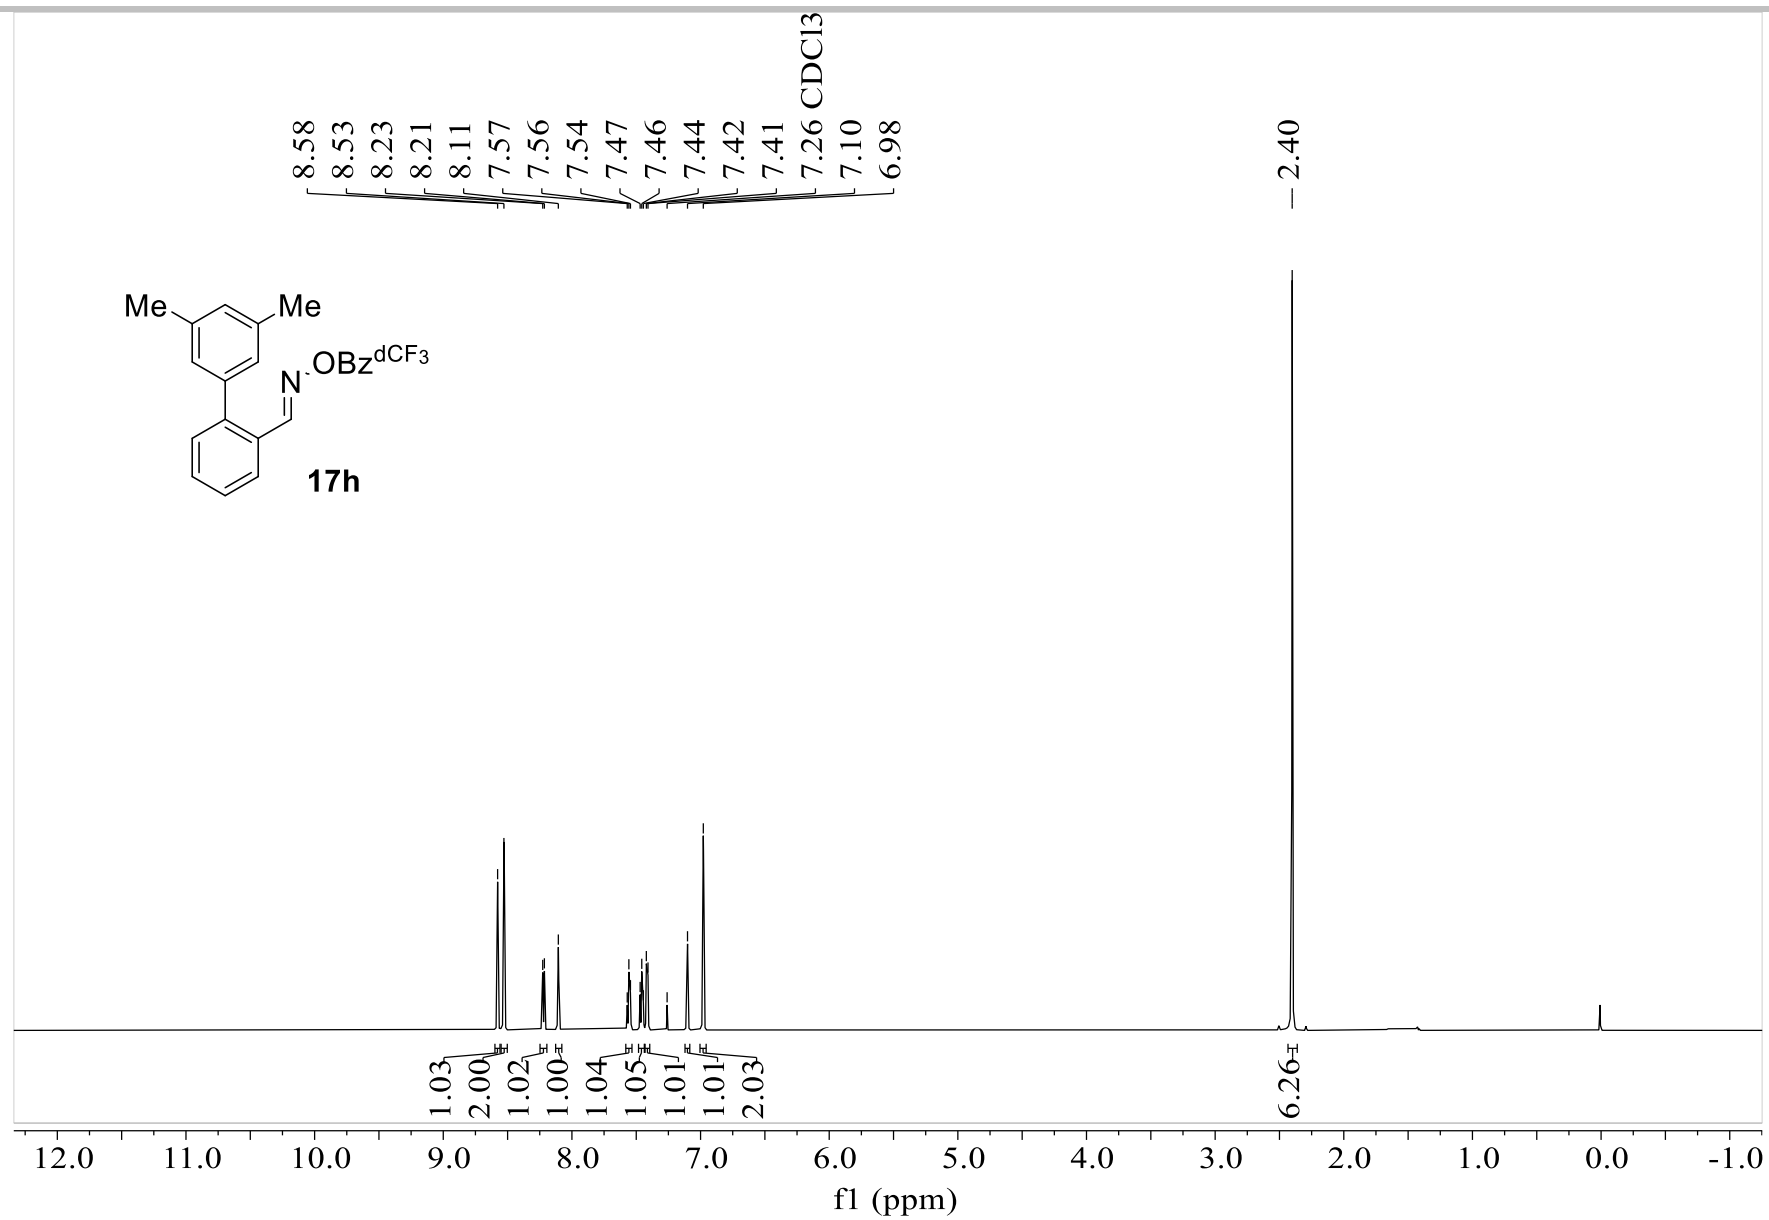

SUPPORTING INFORMATION

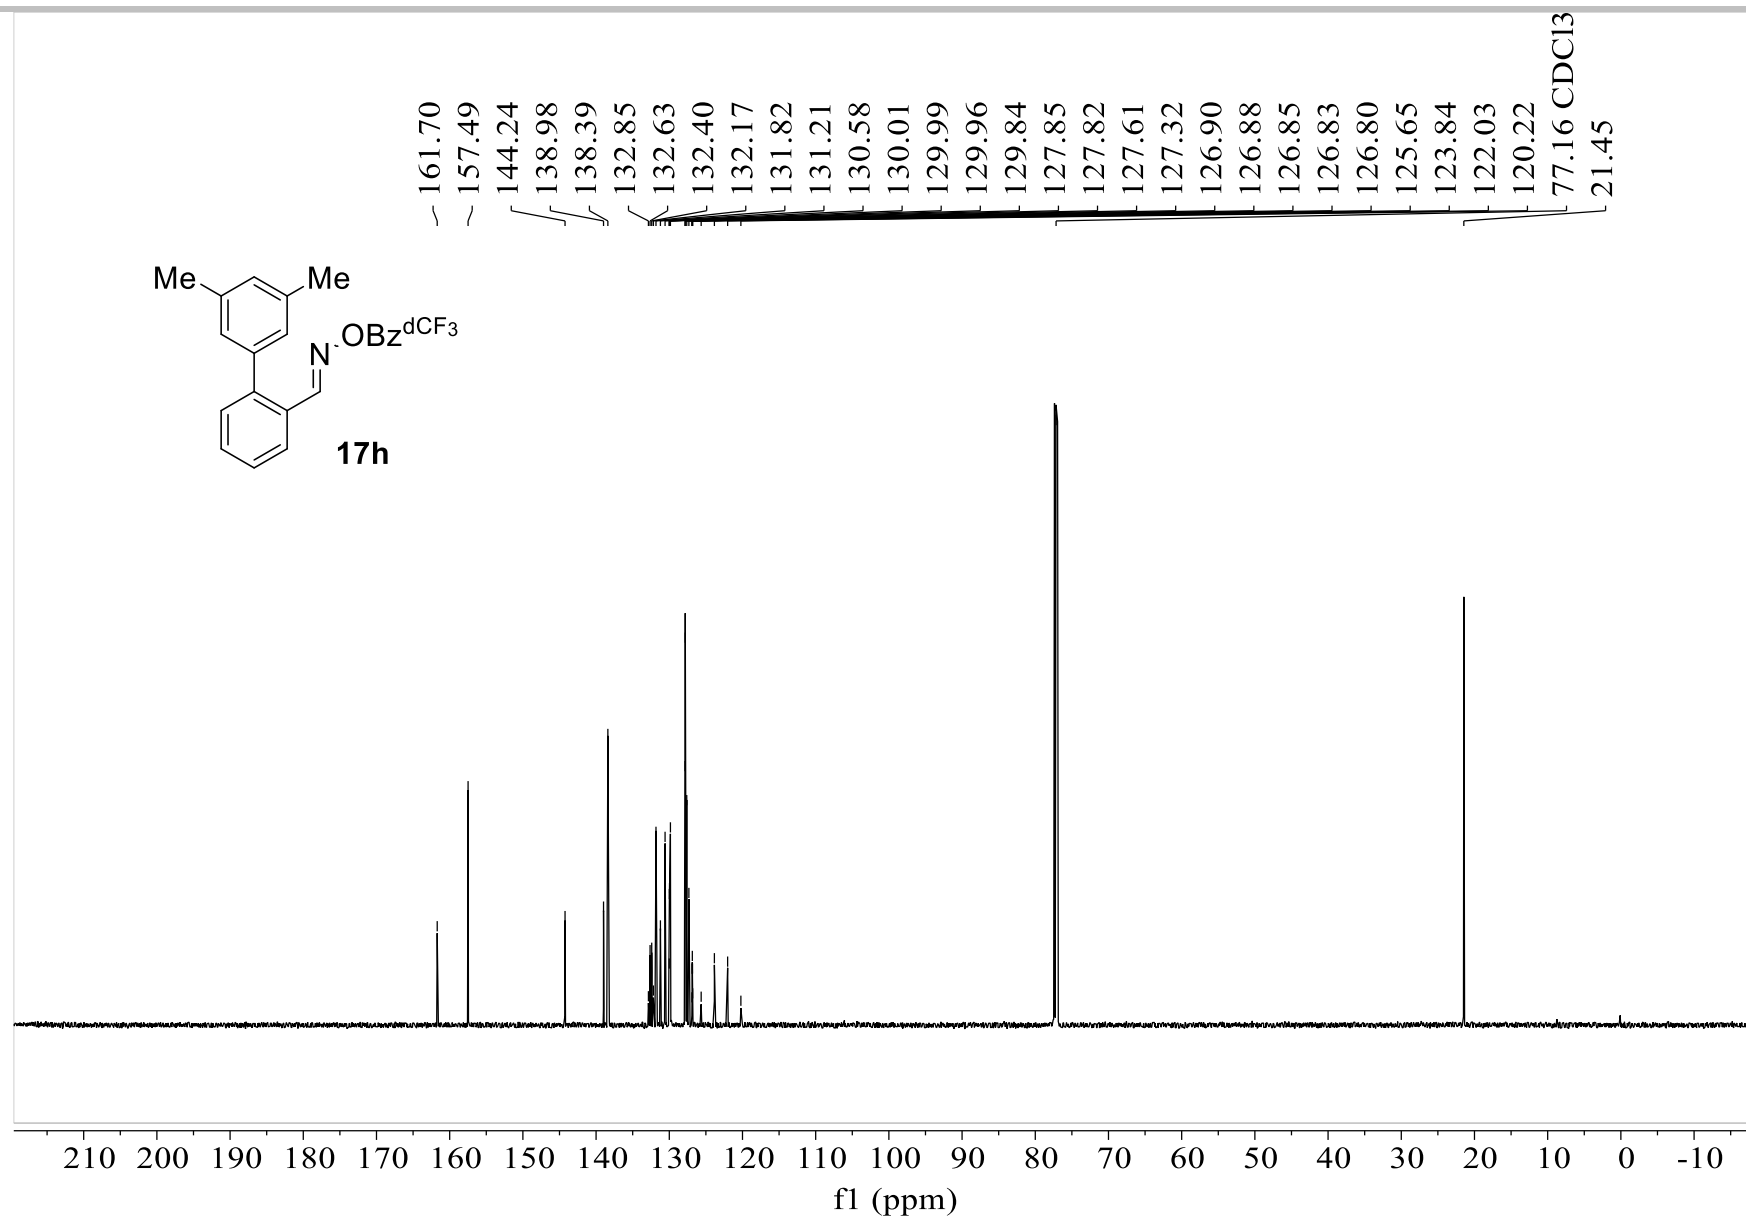

SUPPORTING INFORMATION

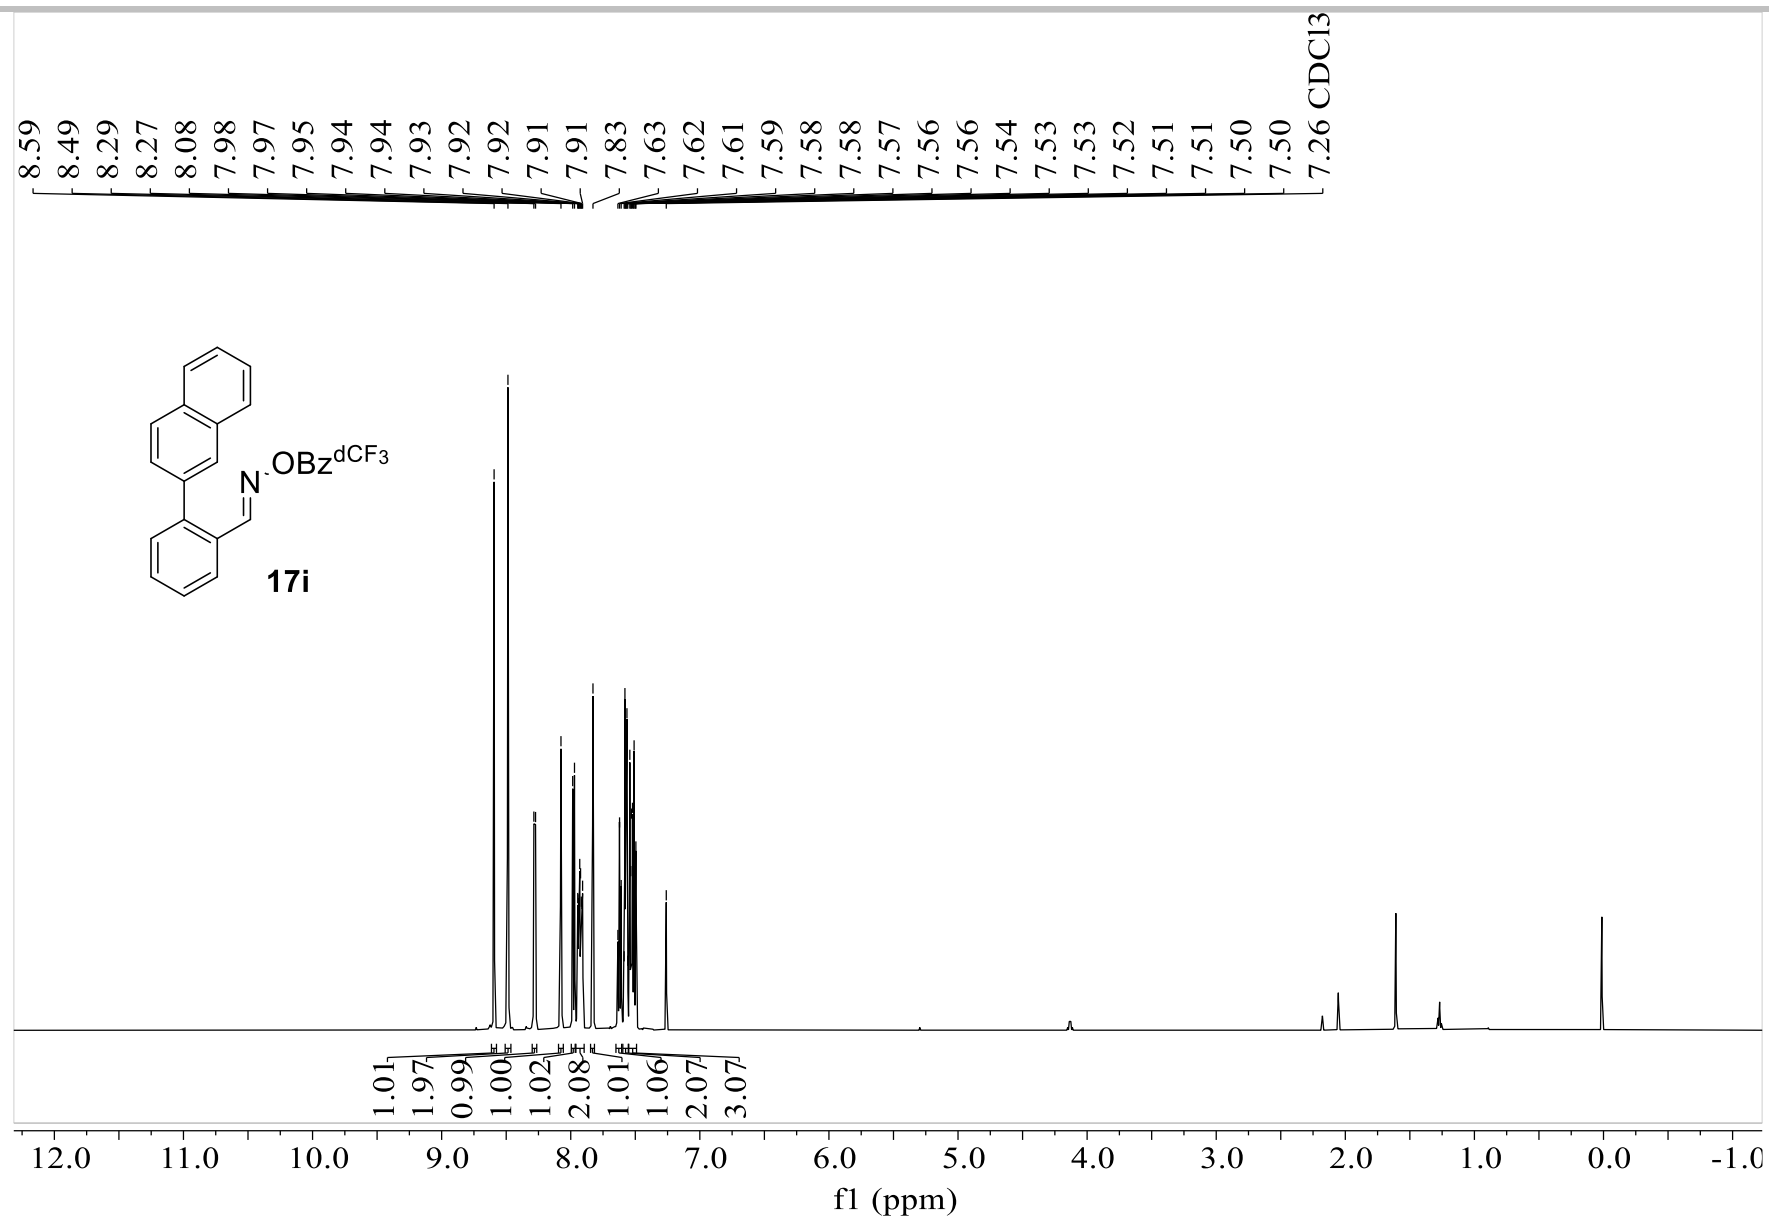



SUPPORTING INFORMATION

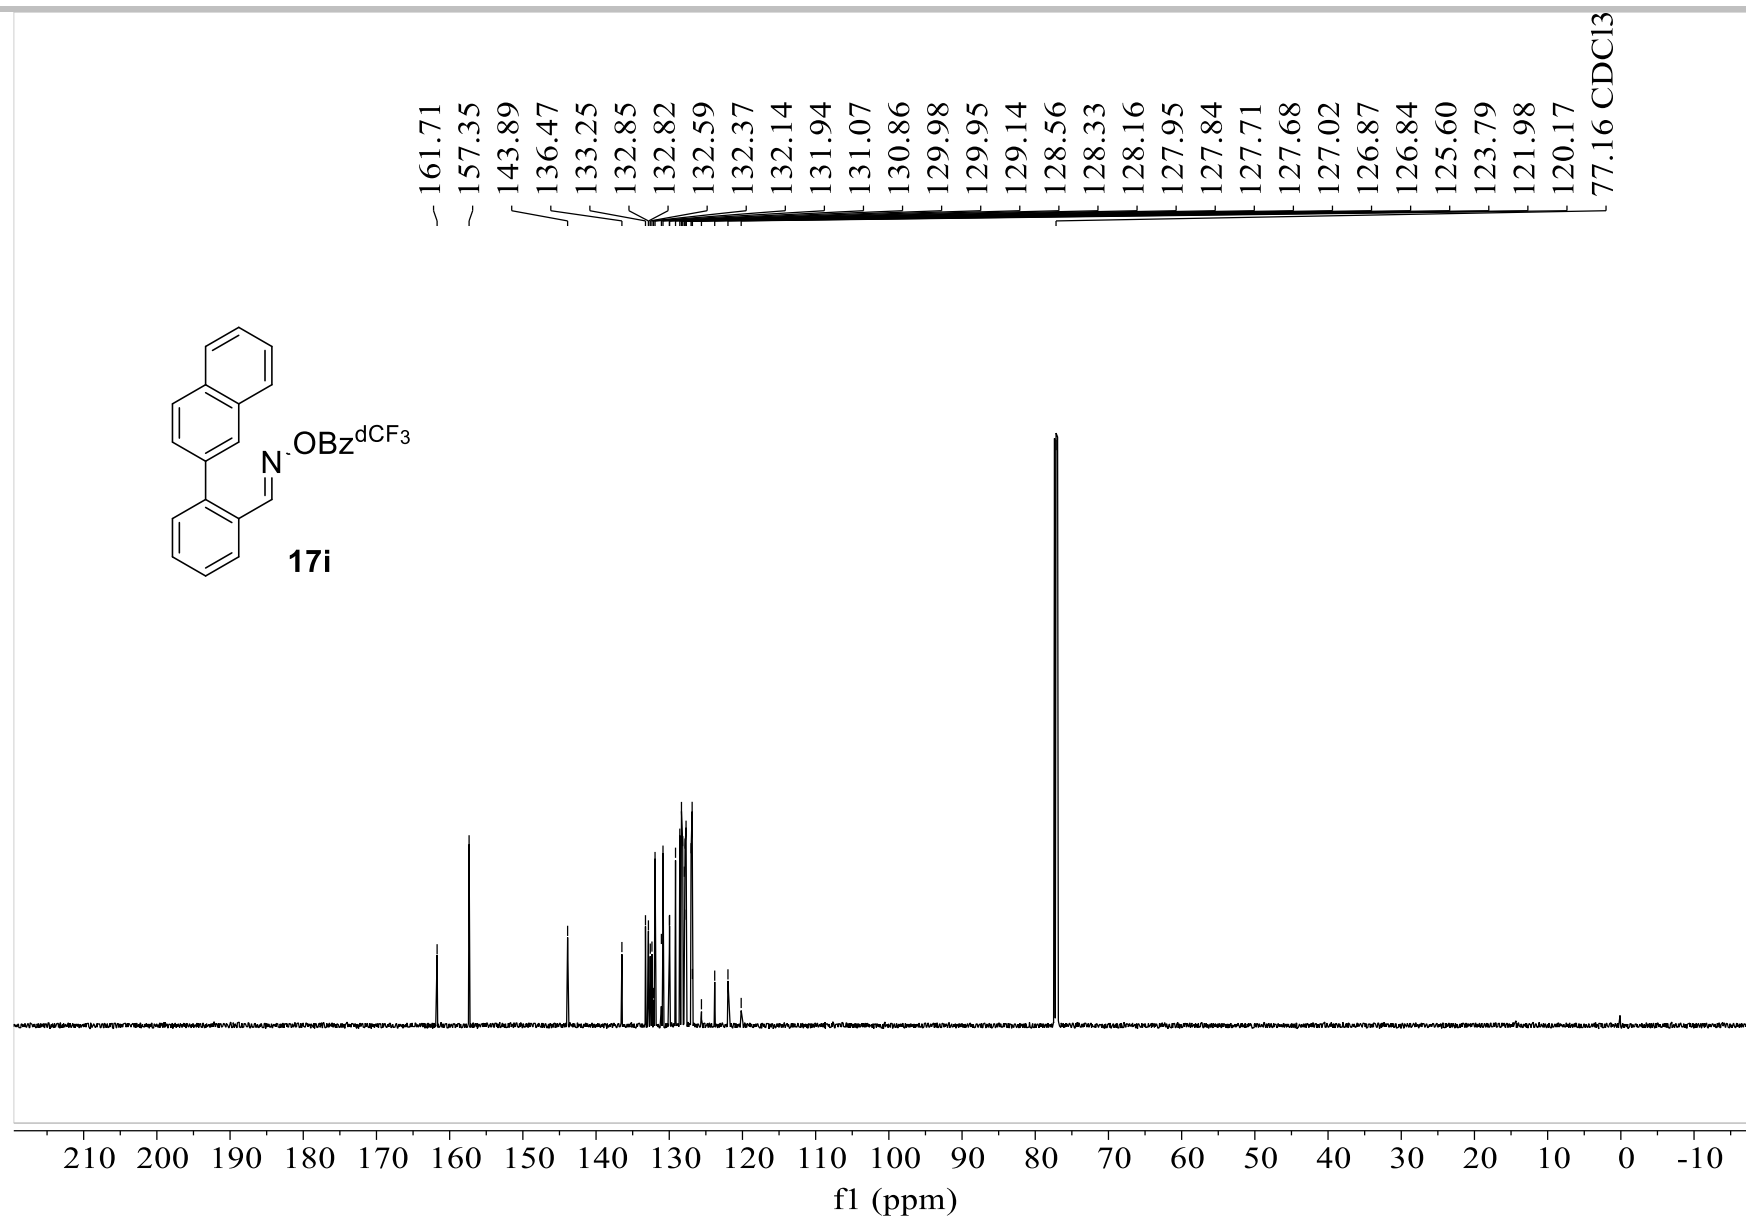

SUPPORTING INFORMATION

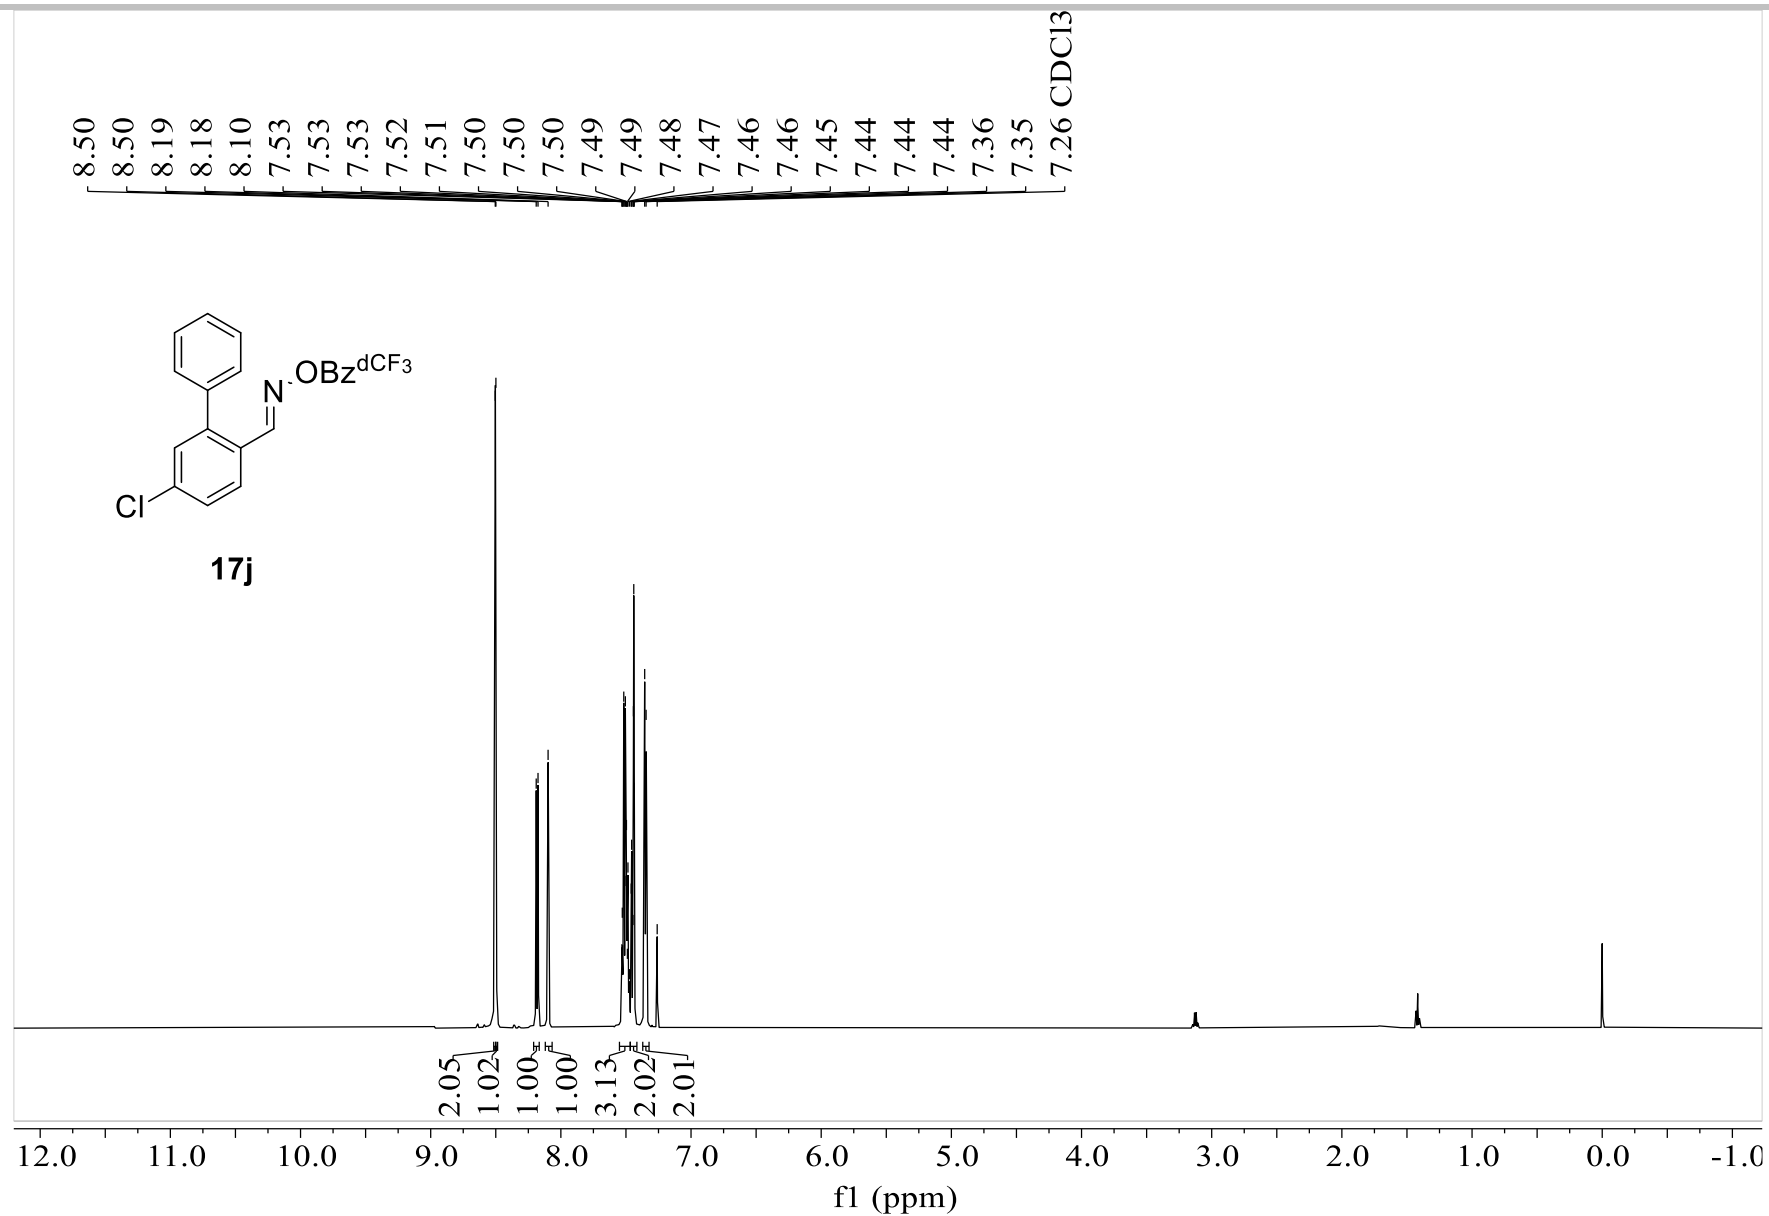

# SUPPORTING INFORMATION

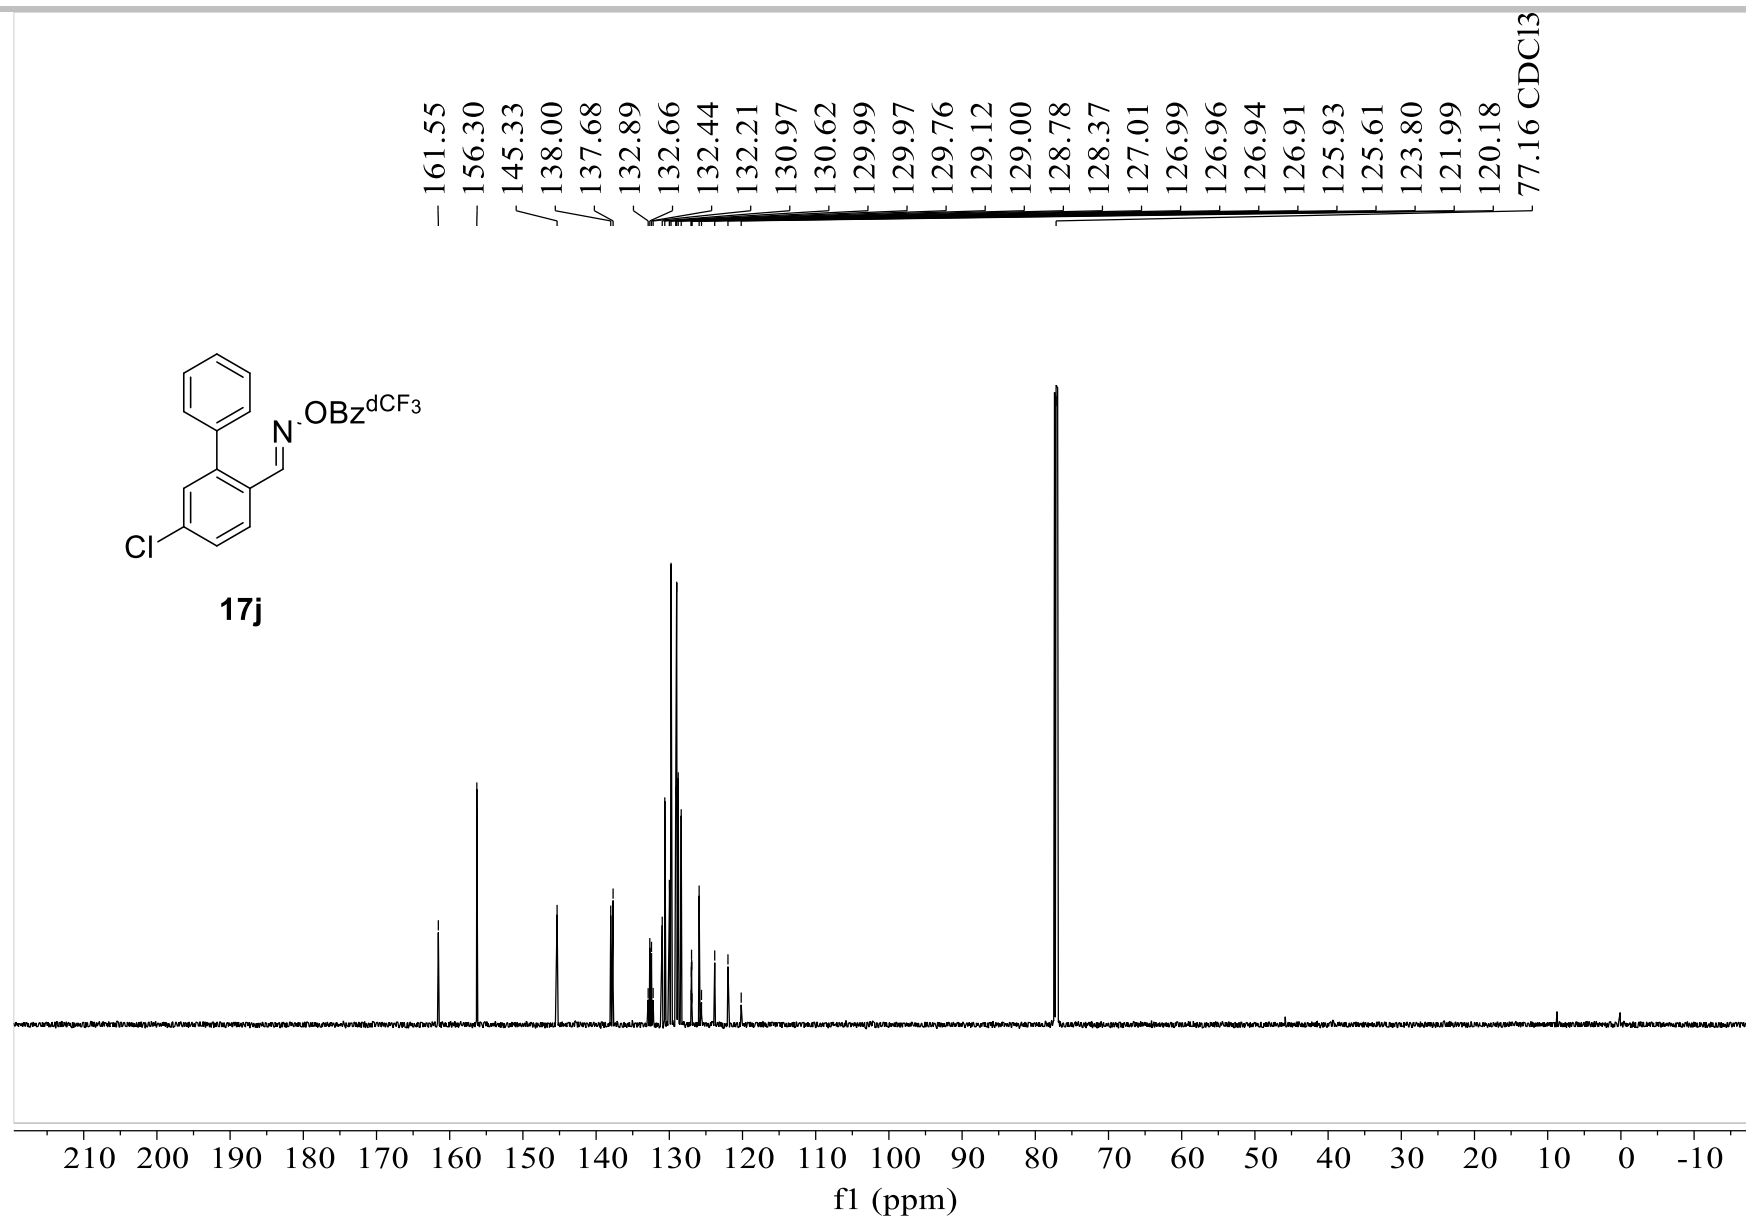

SUPPORTING INFORMATION

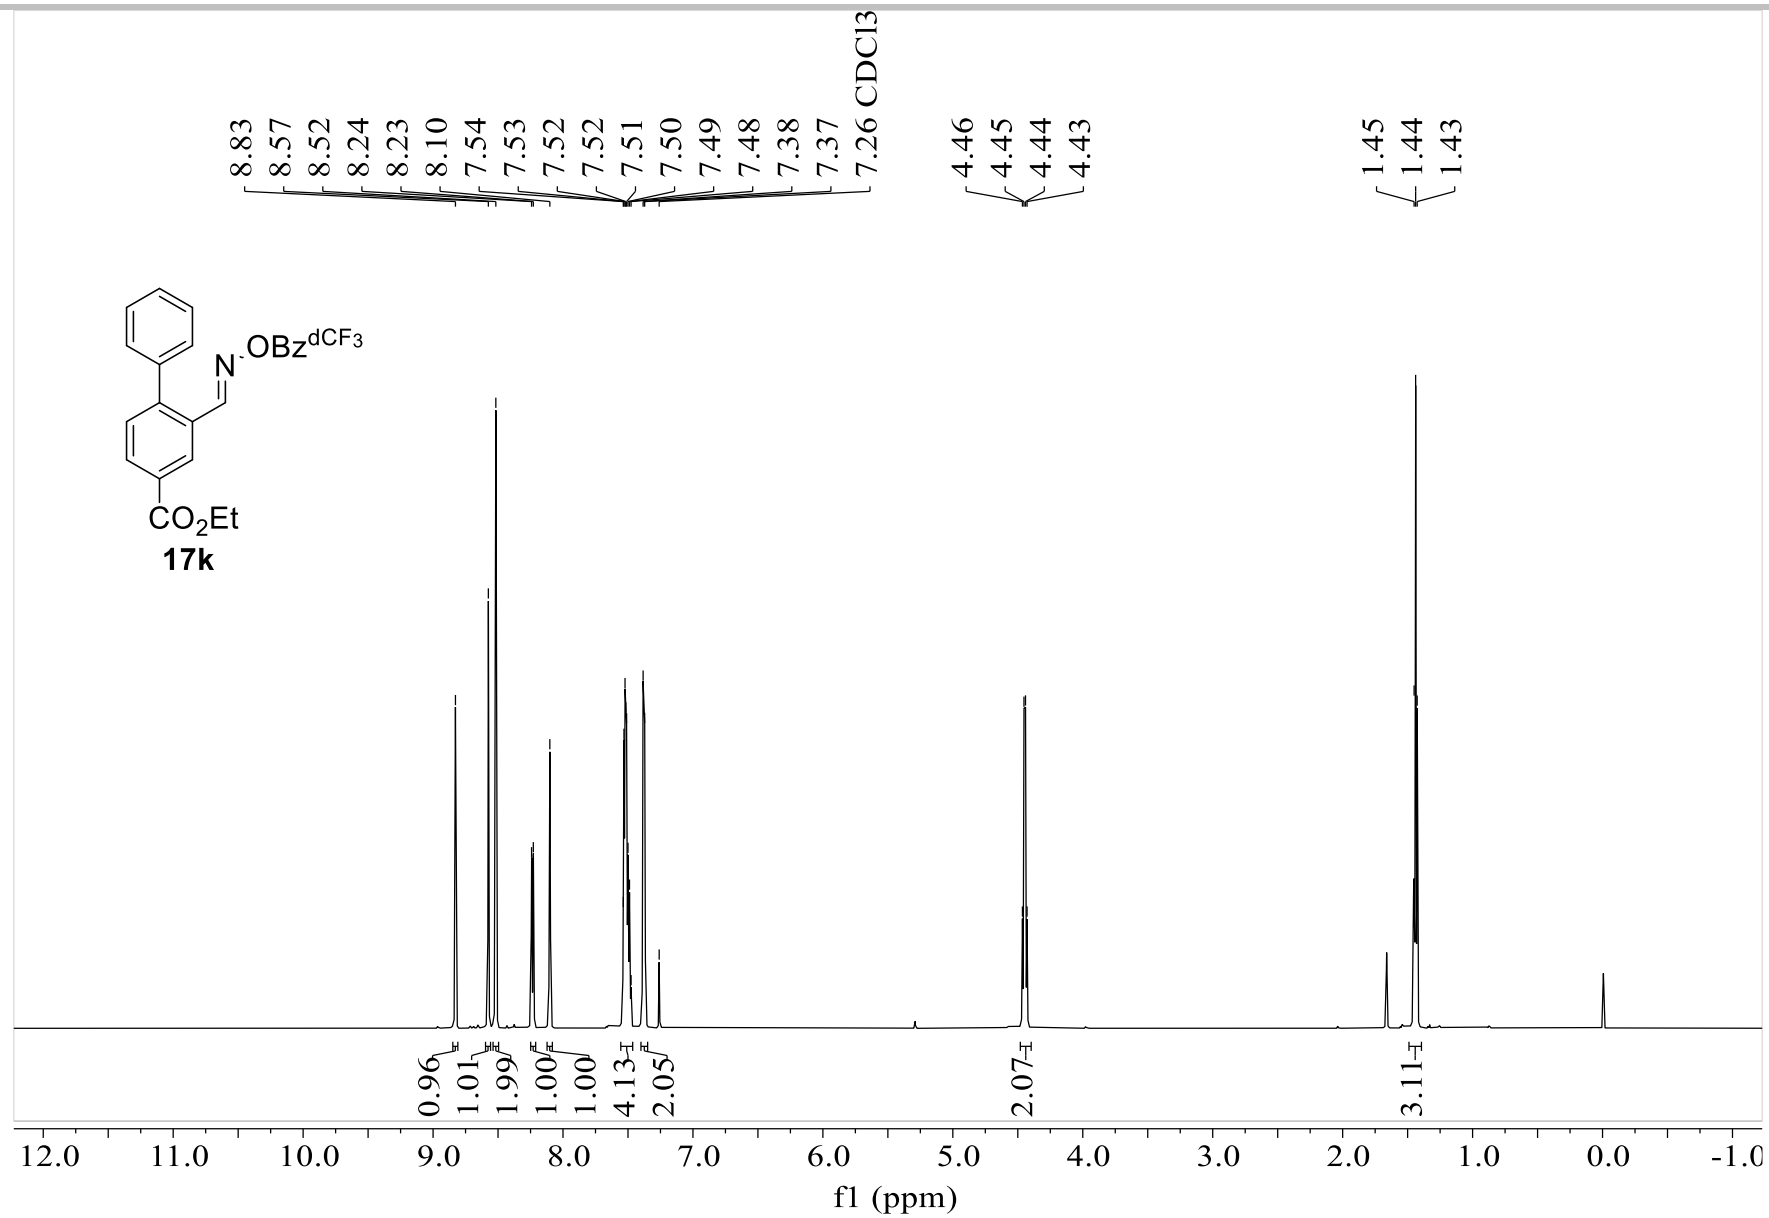

SUPPORTING INFORMATION

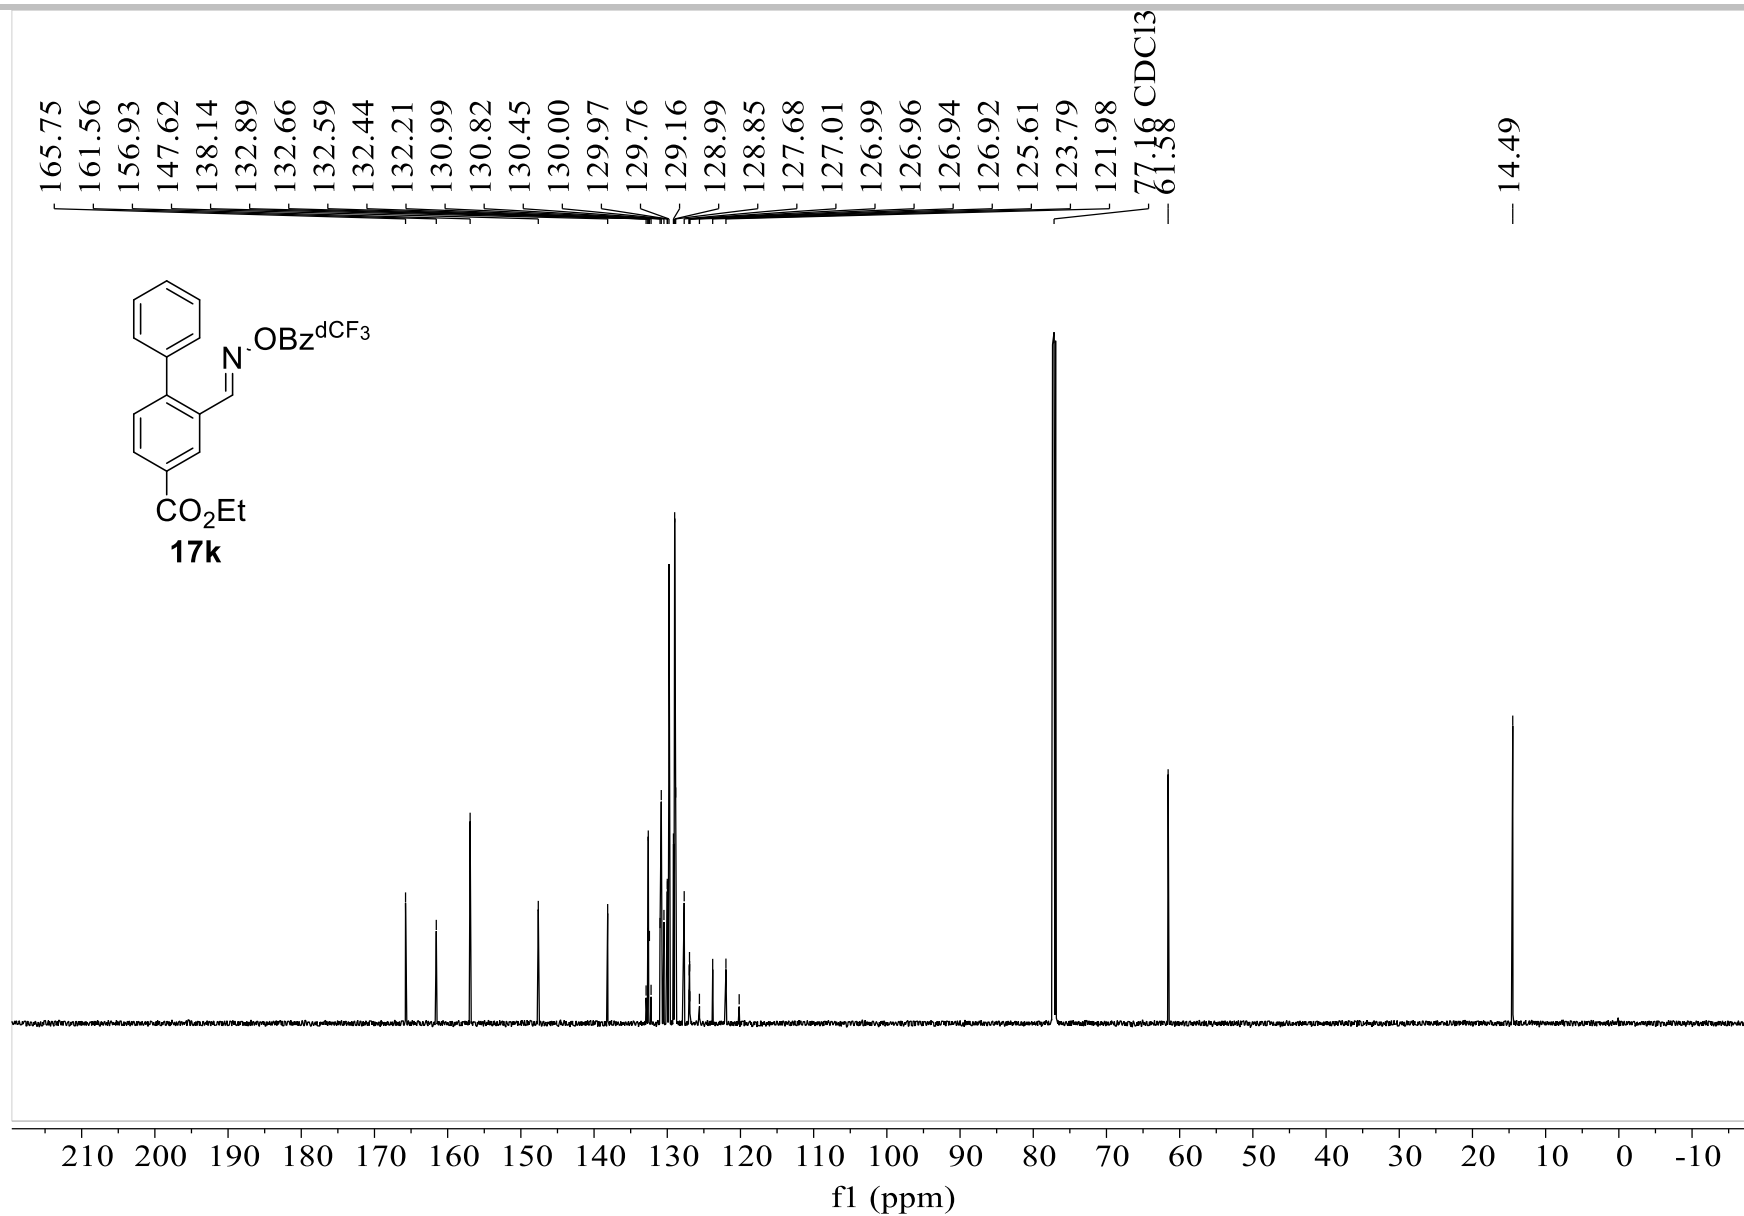

SUPPORTING INFORMATION

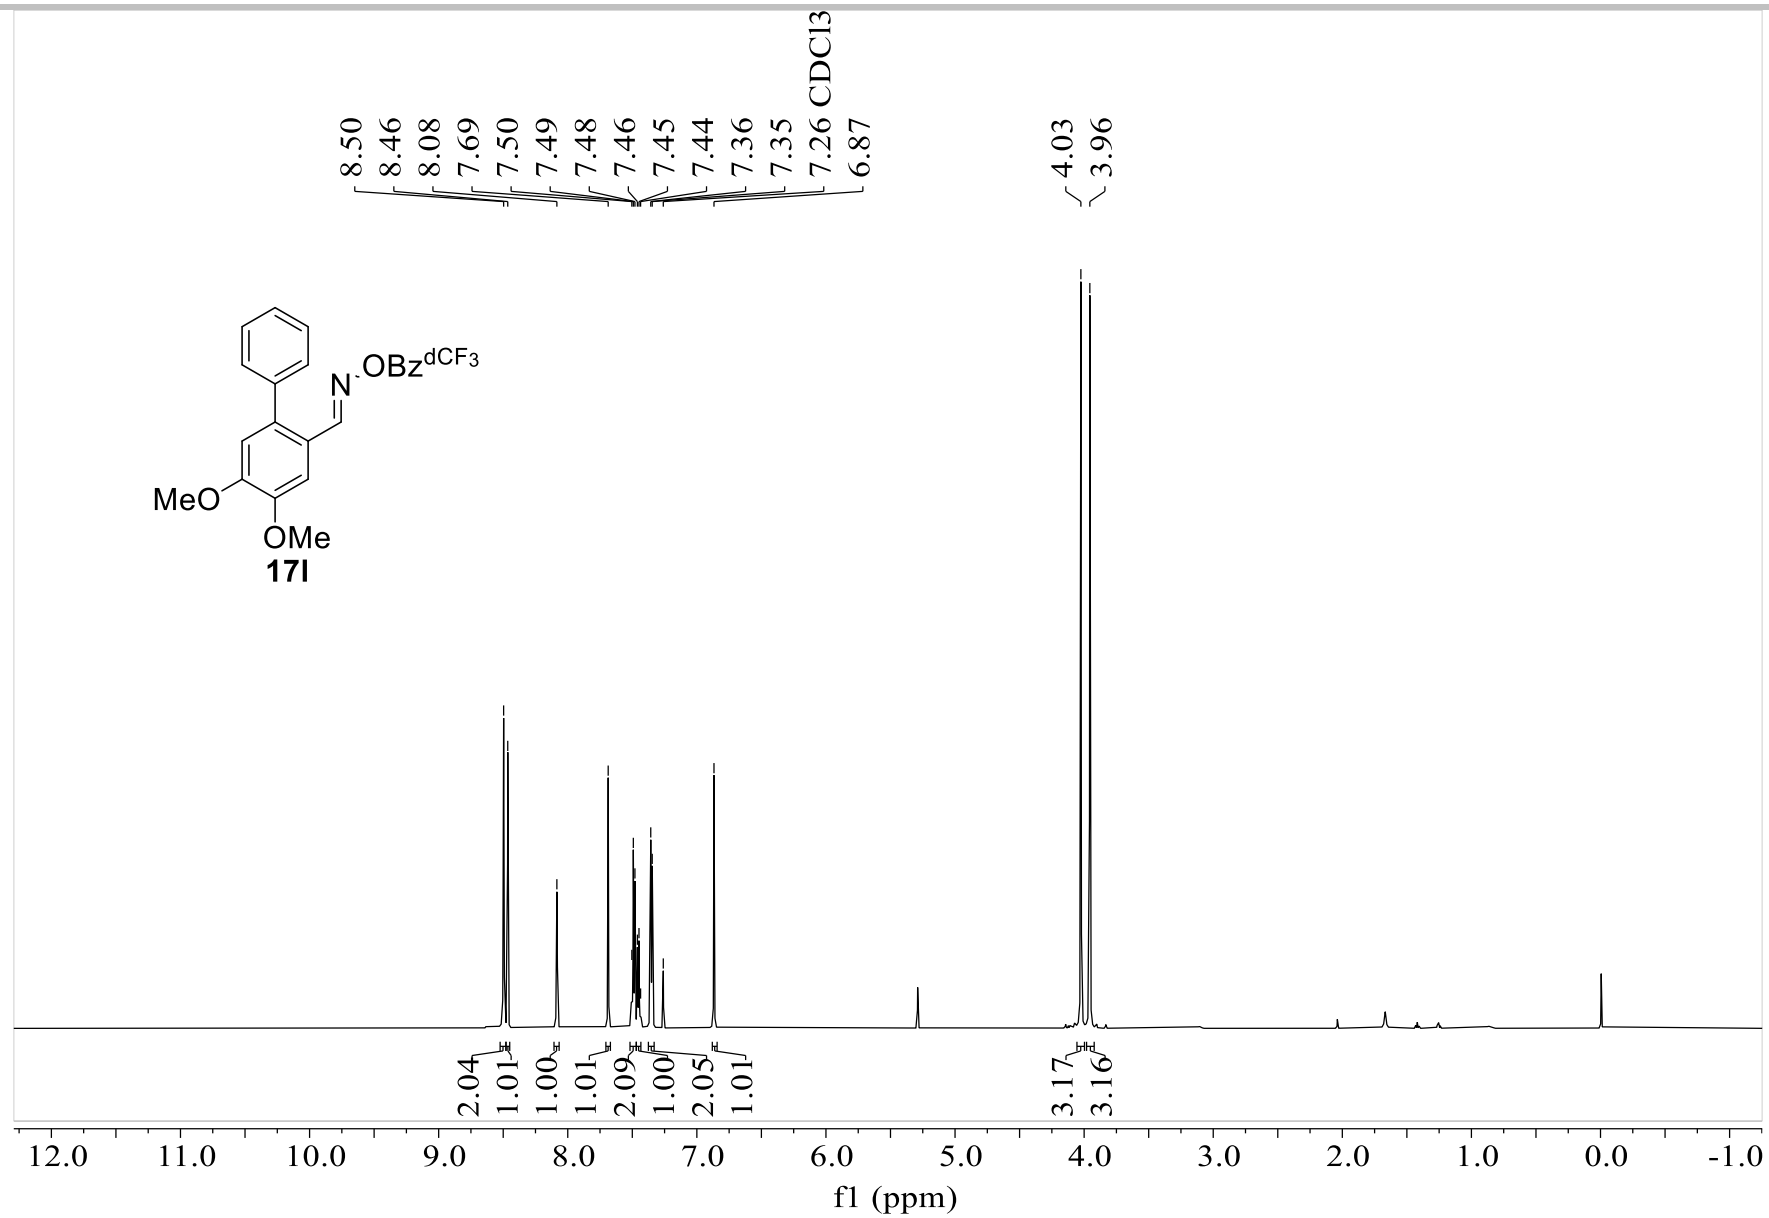

SUPPORTING INFORMATION

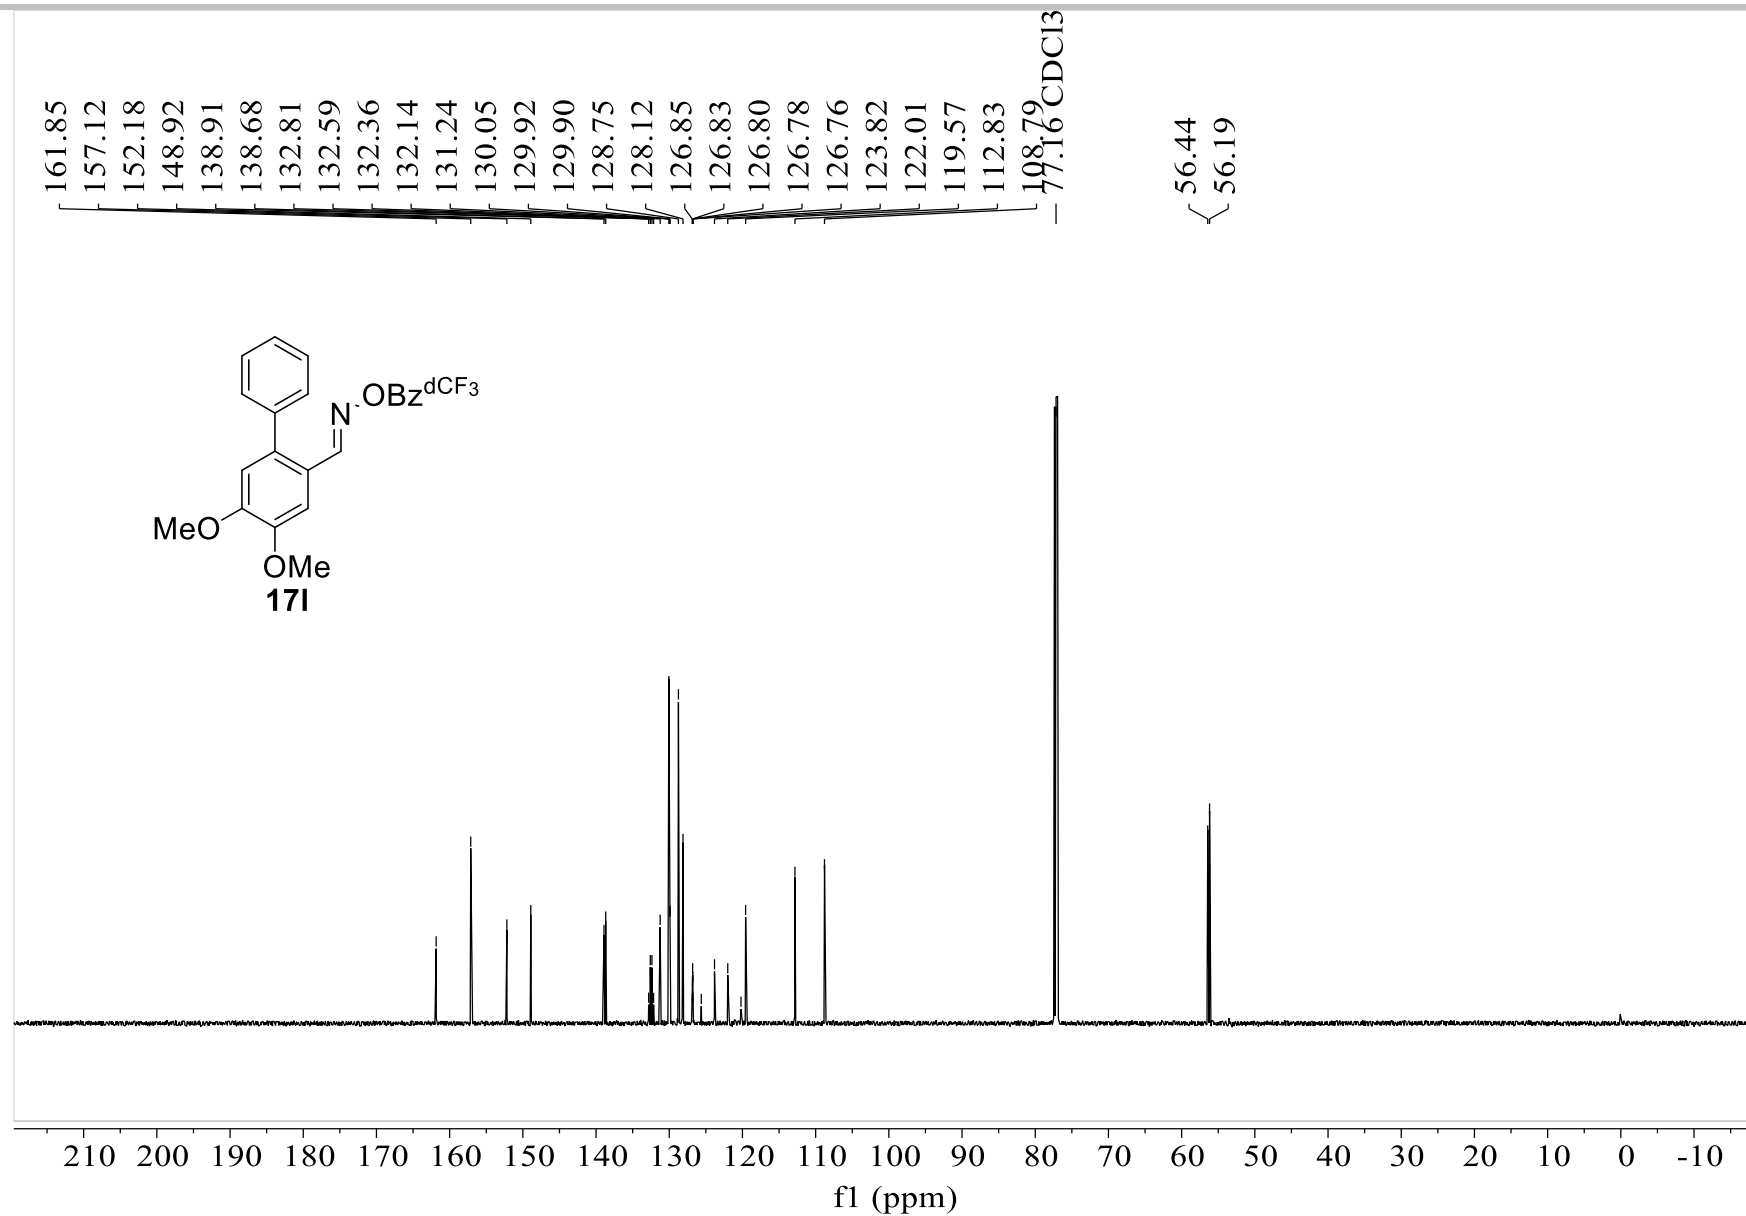

SUPPORTING INFORMATION

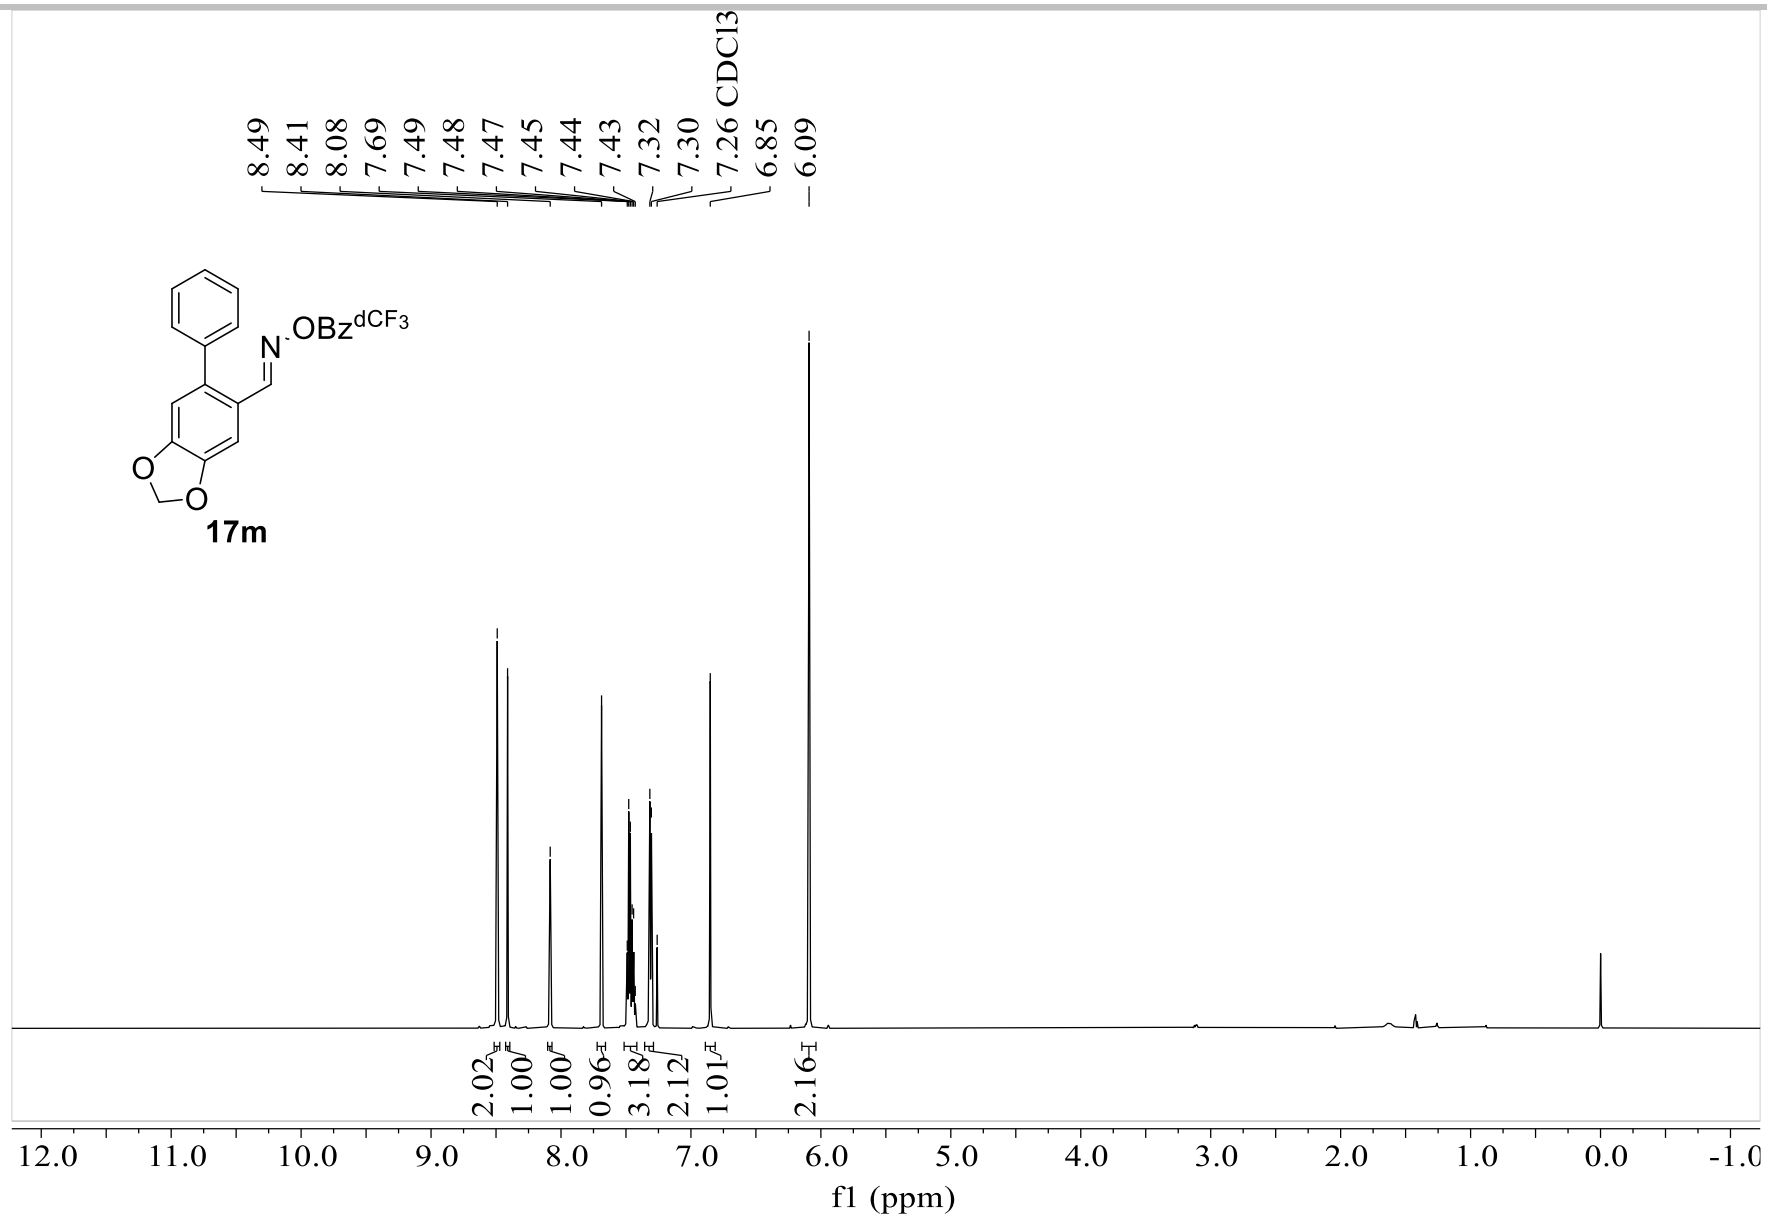



# SUPPORTING INFORMATION

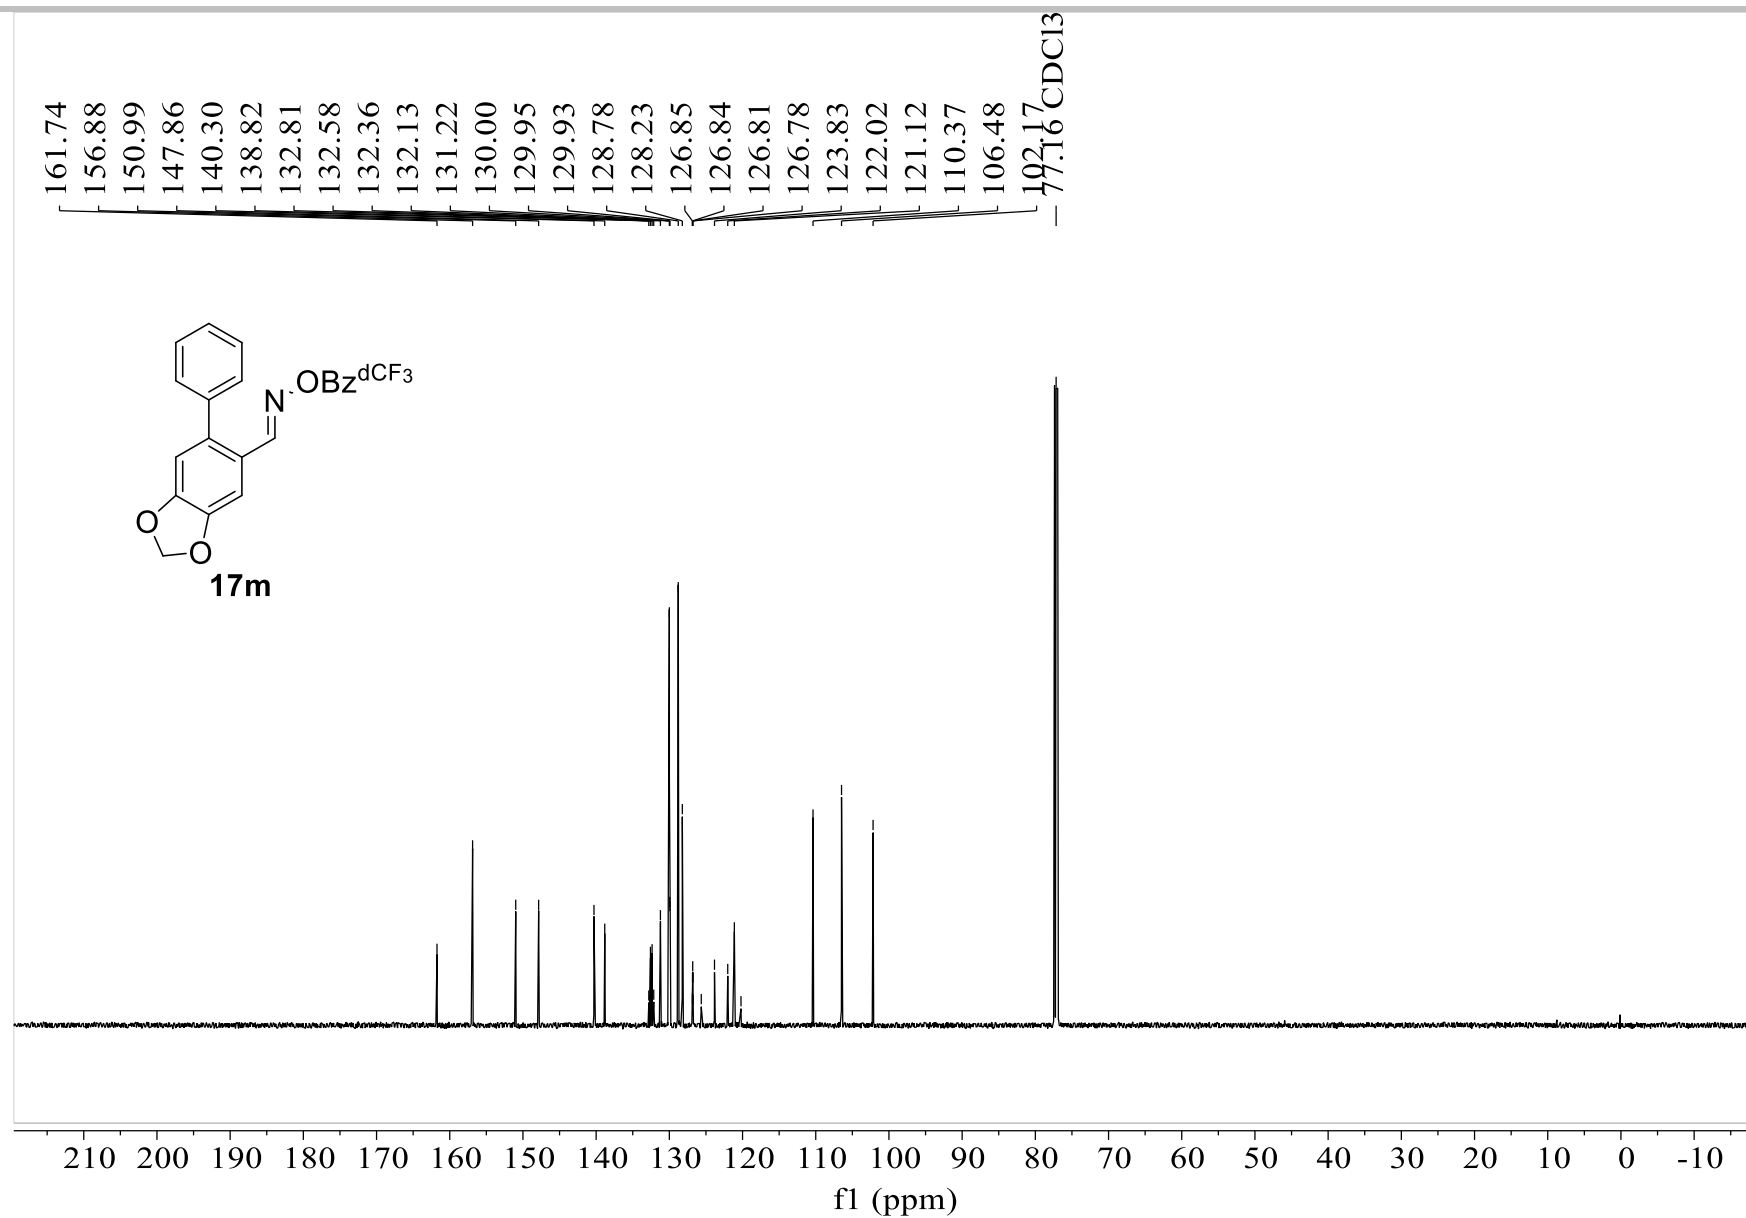

SUPPORTING INFORMATION

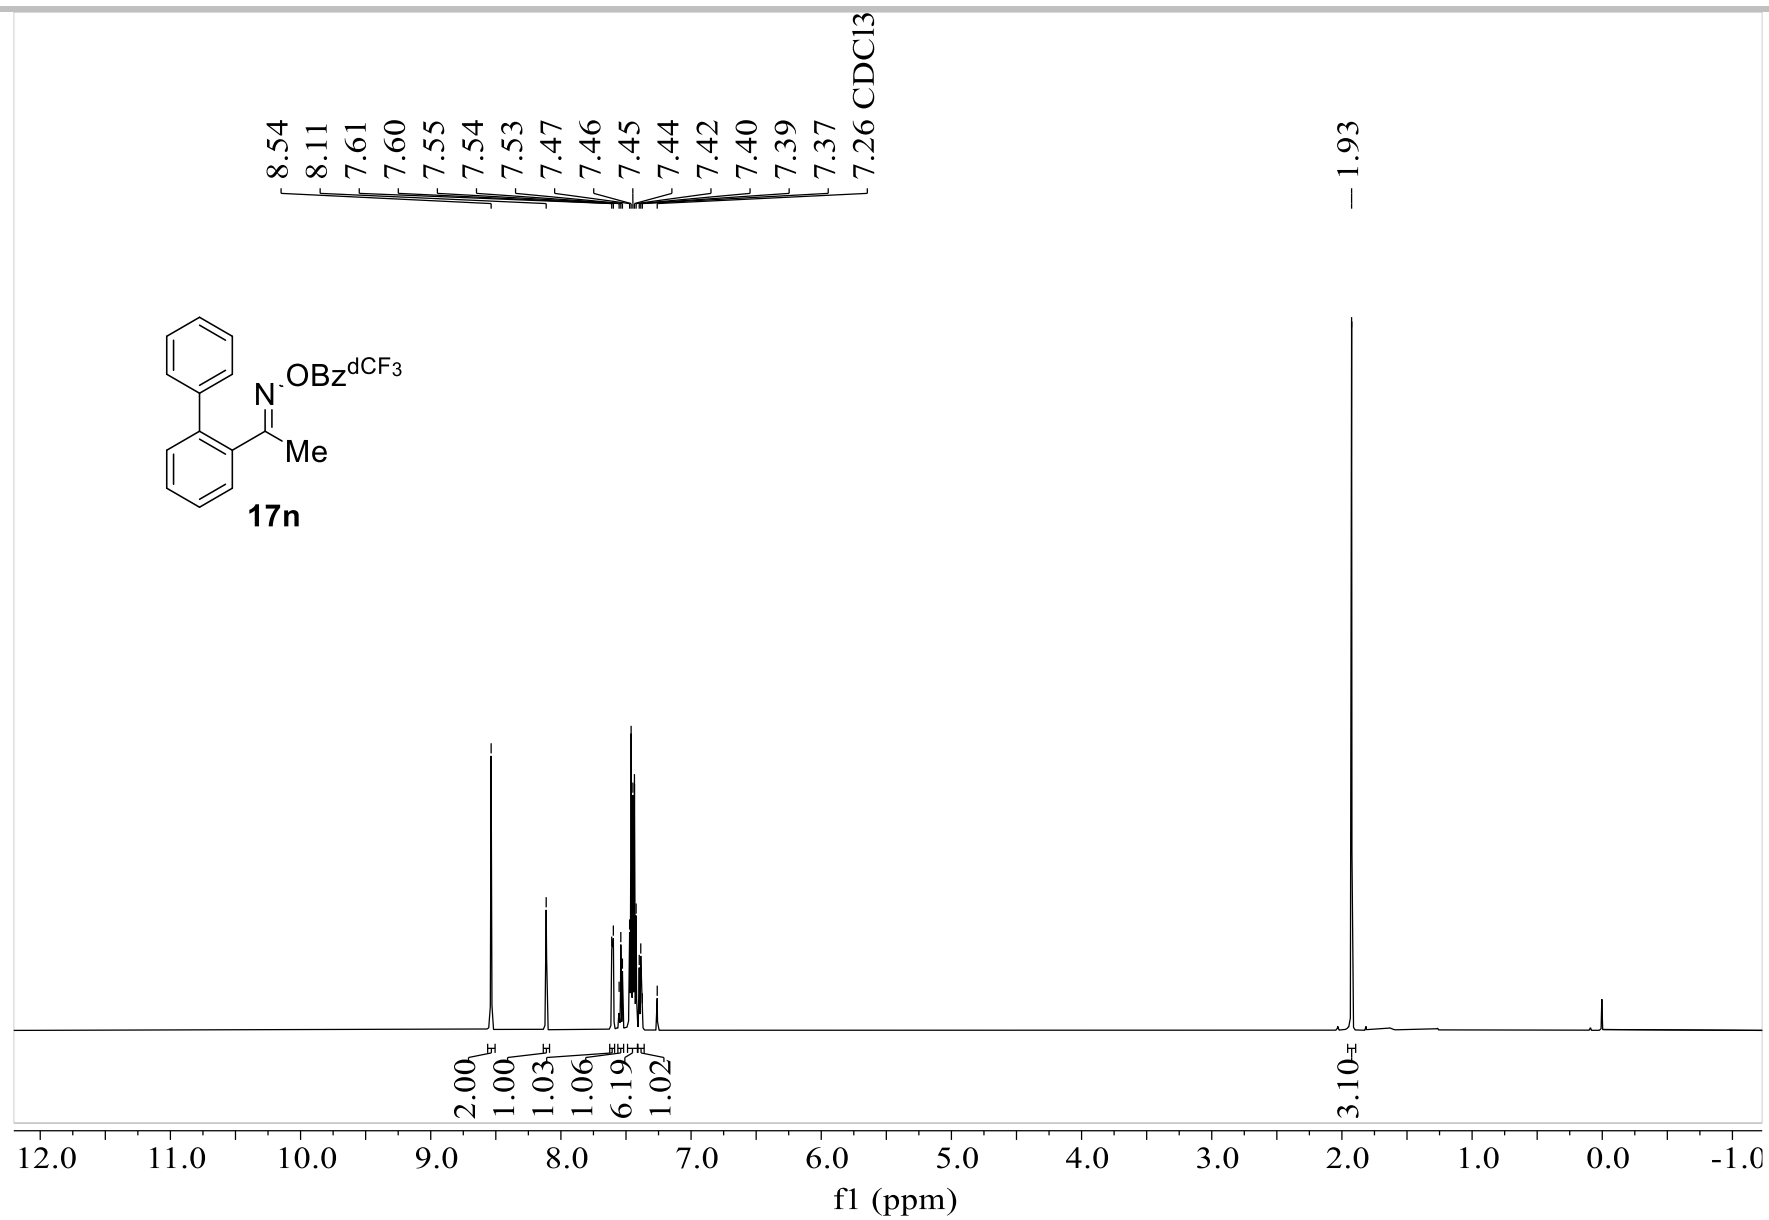

SUPPORTING INFORMATION

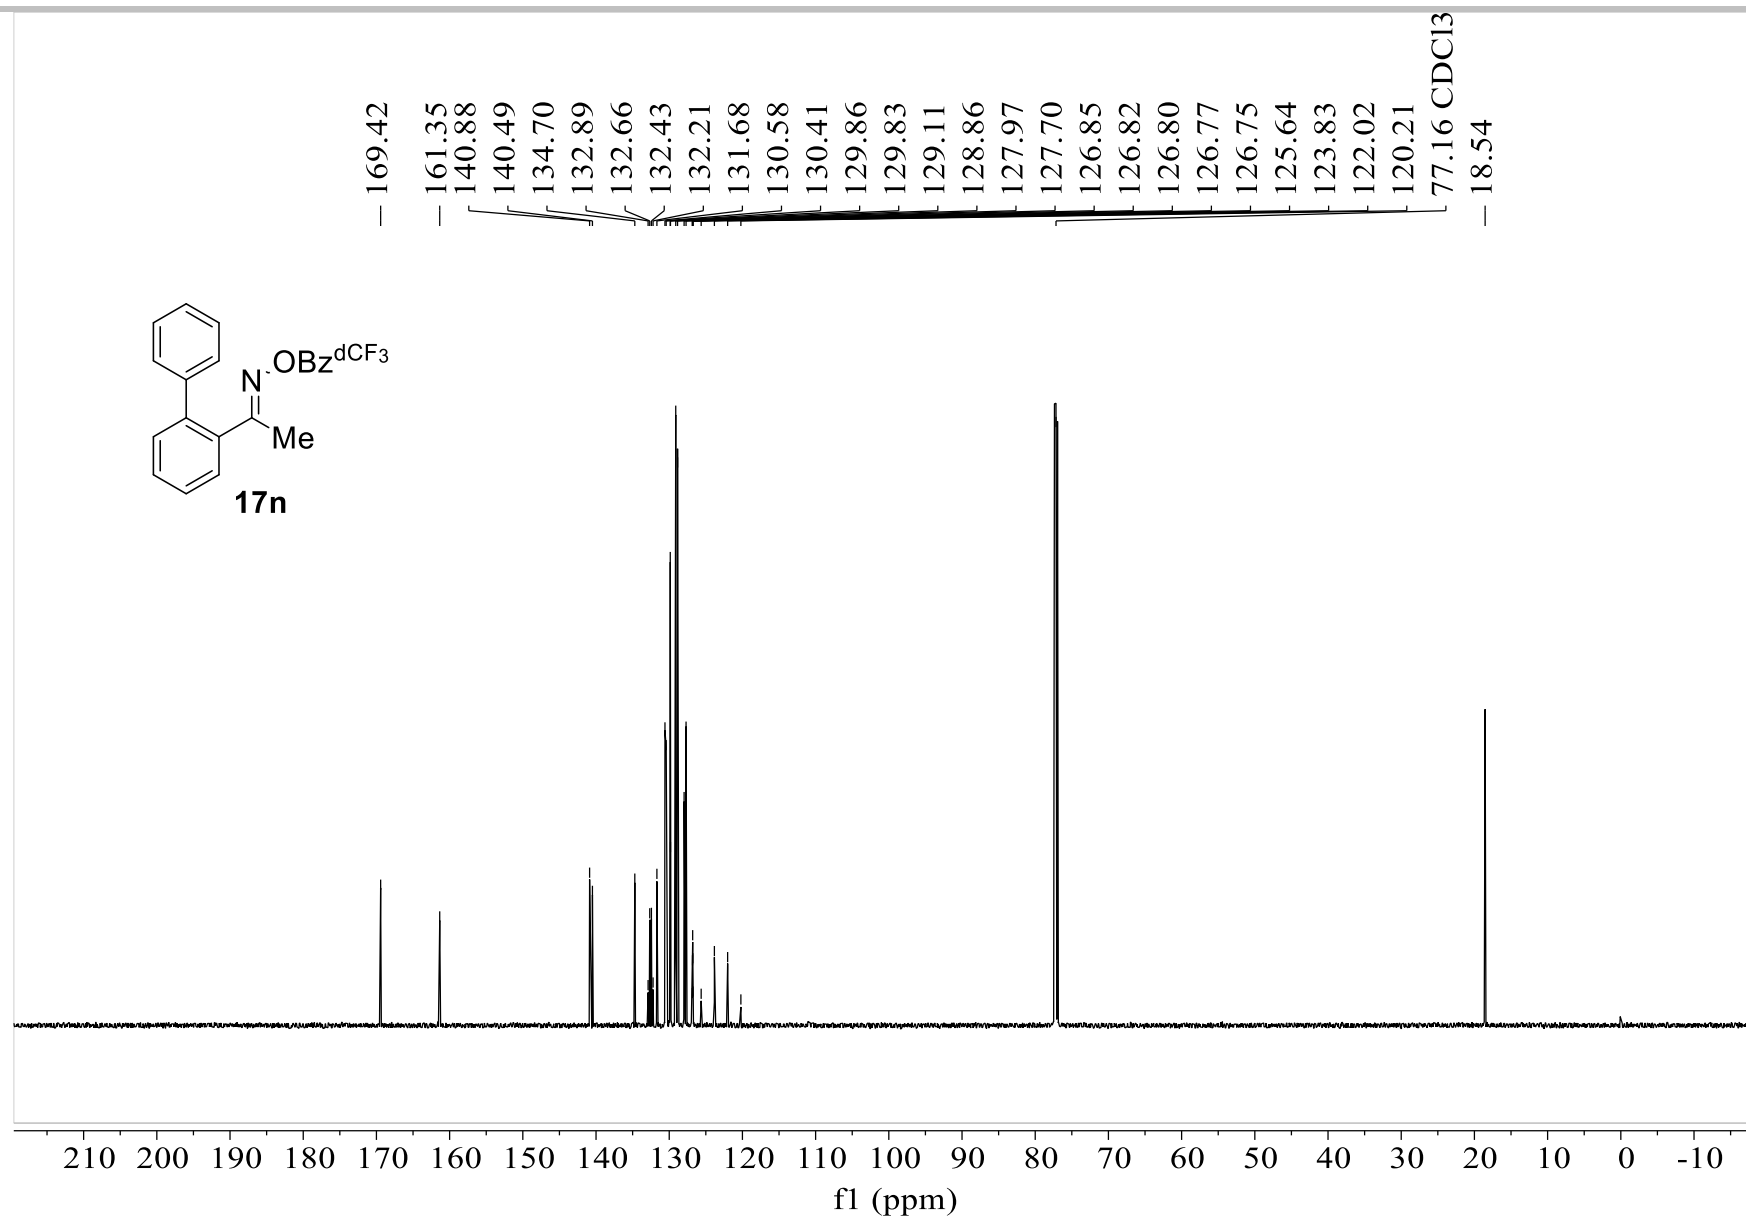

SUPPORTING INFORMATION

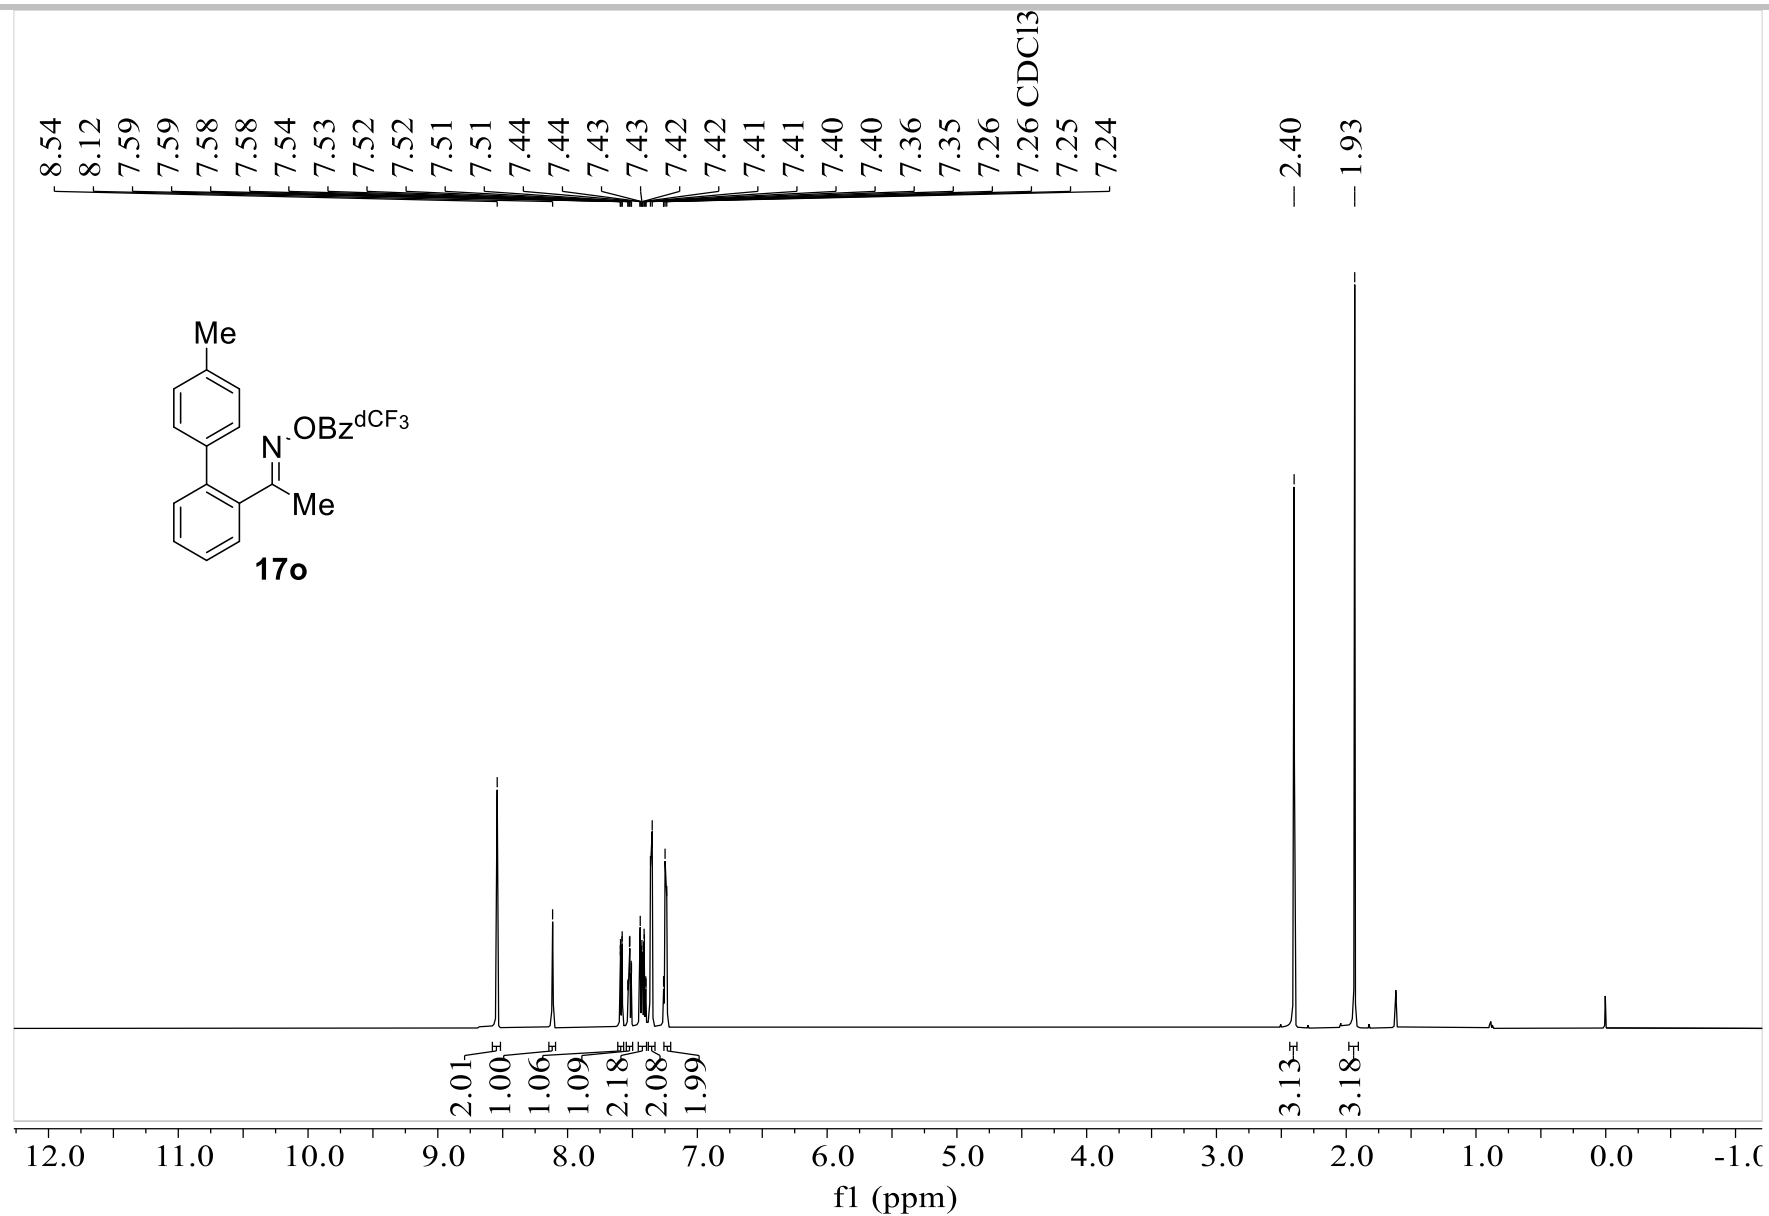

SUPPORTING INFORMATION

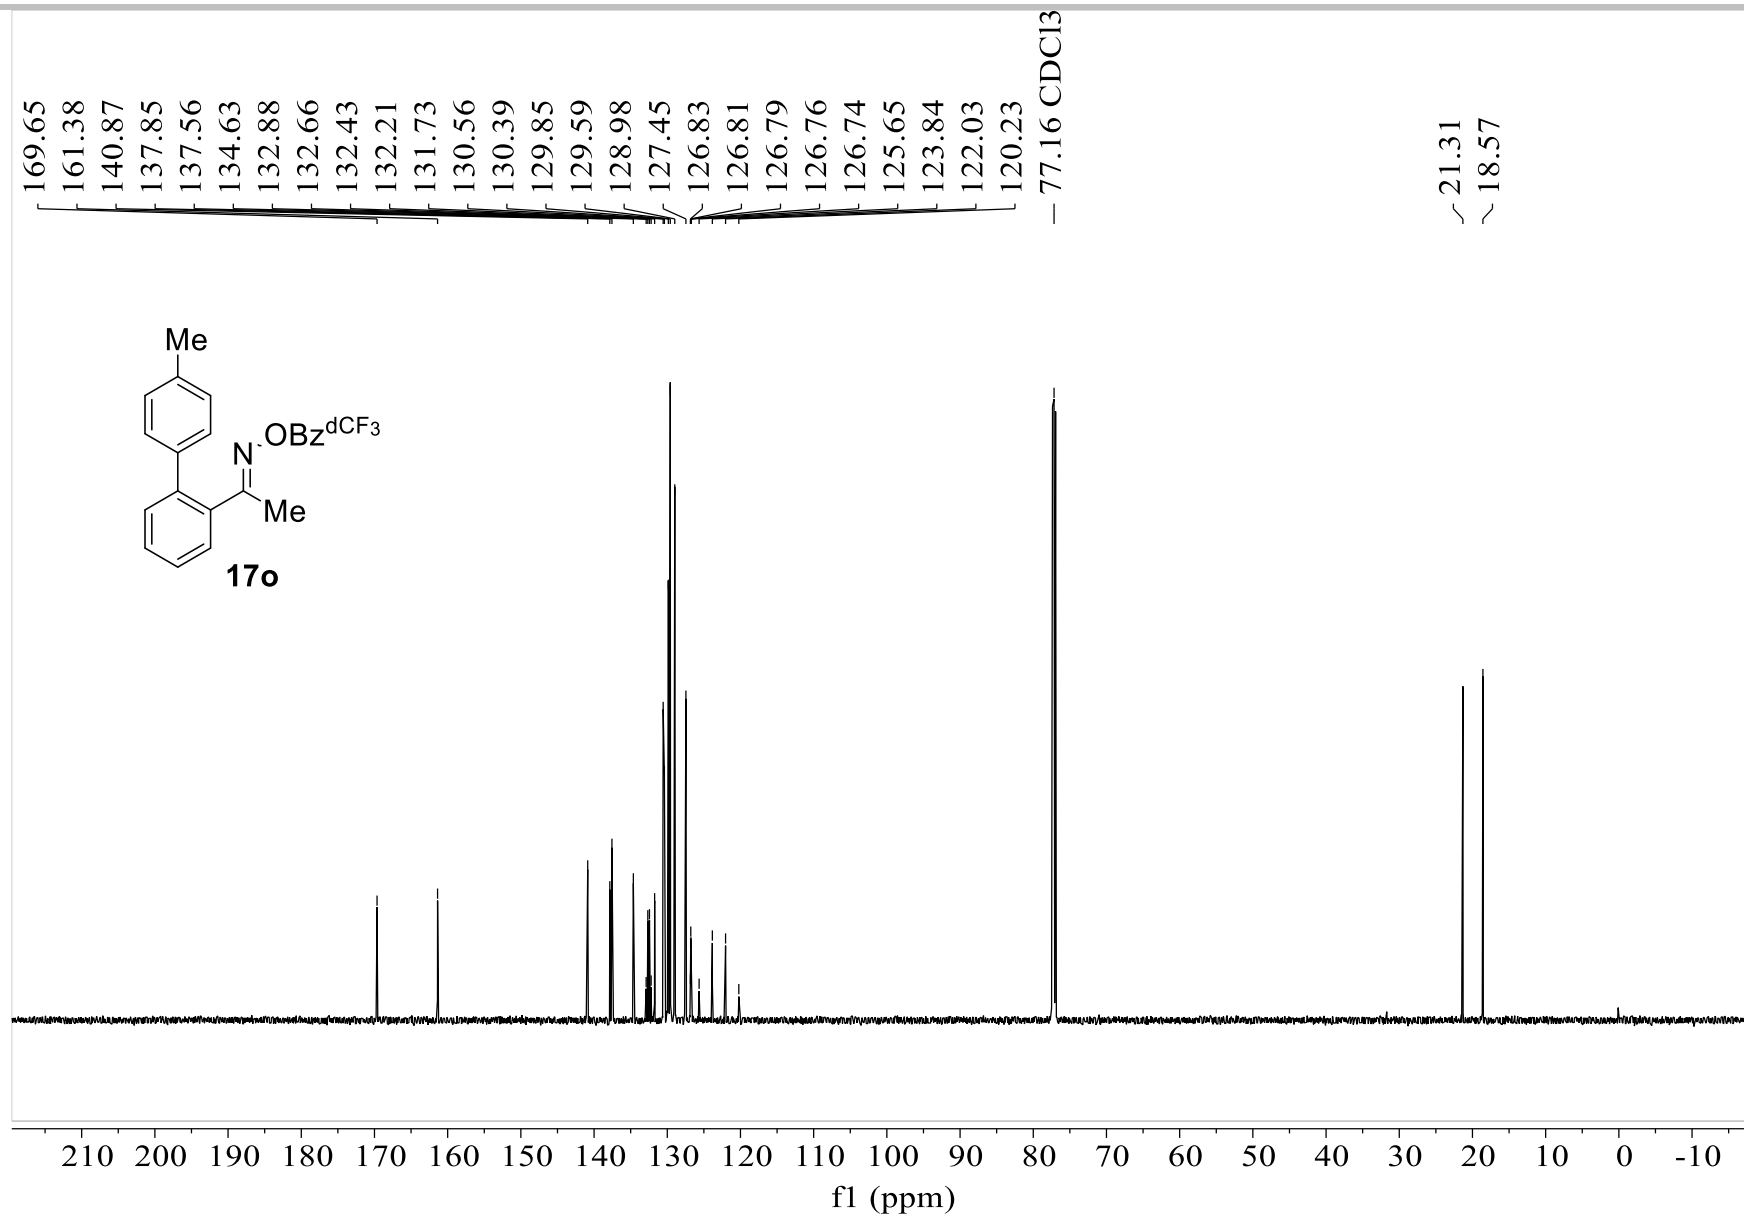

SUPPORTING INFORMATION

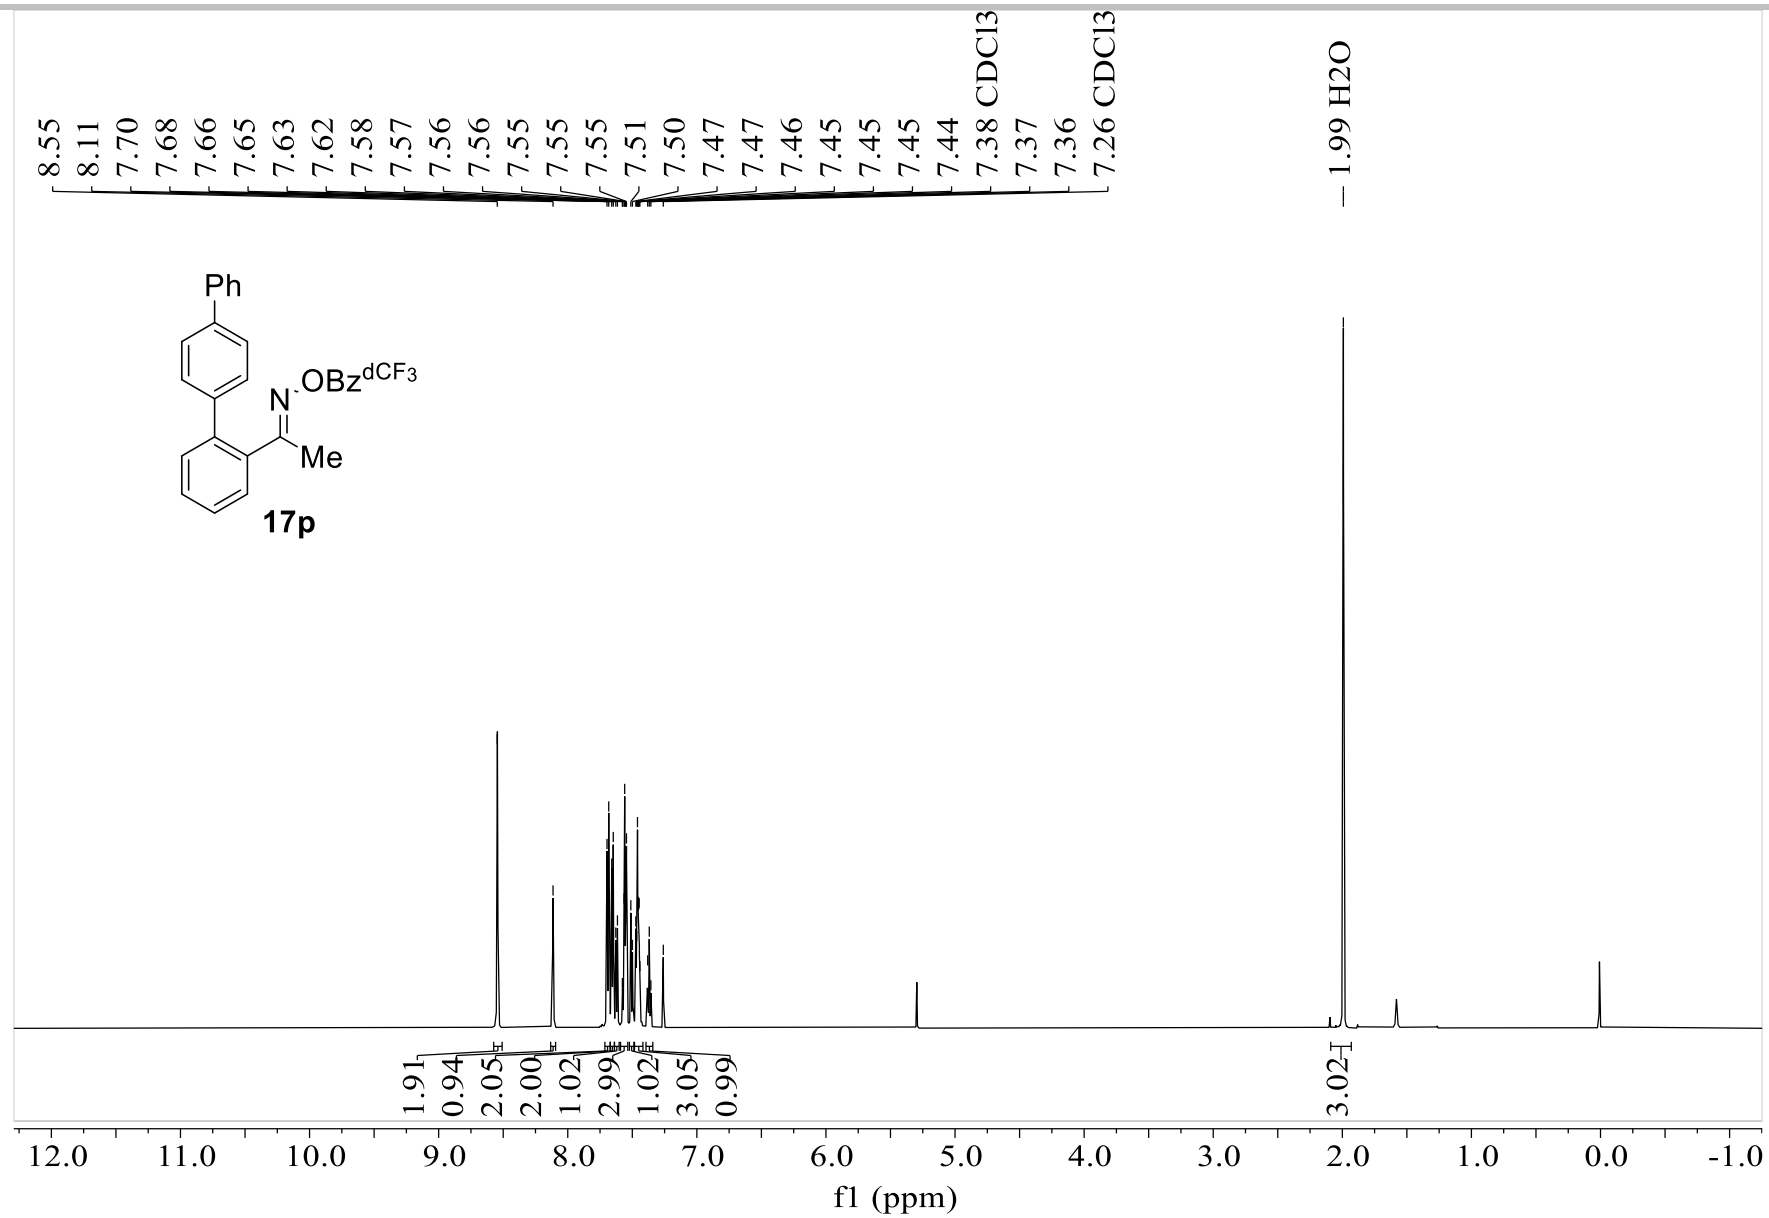

SUPPORTING INFORMATION

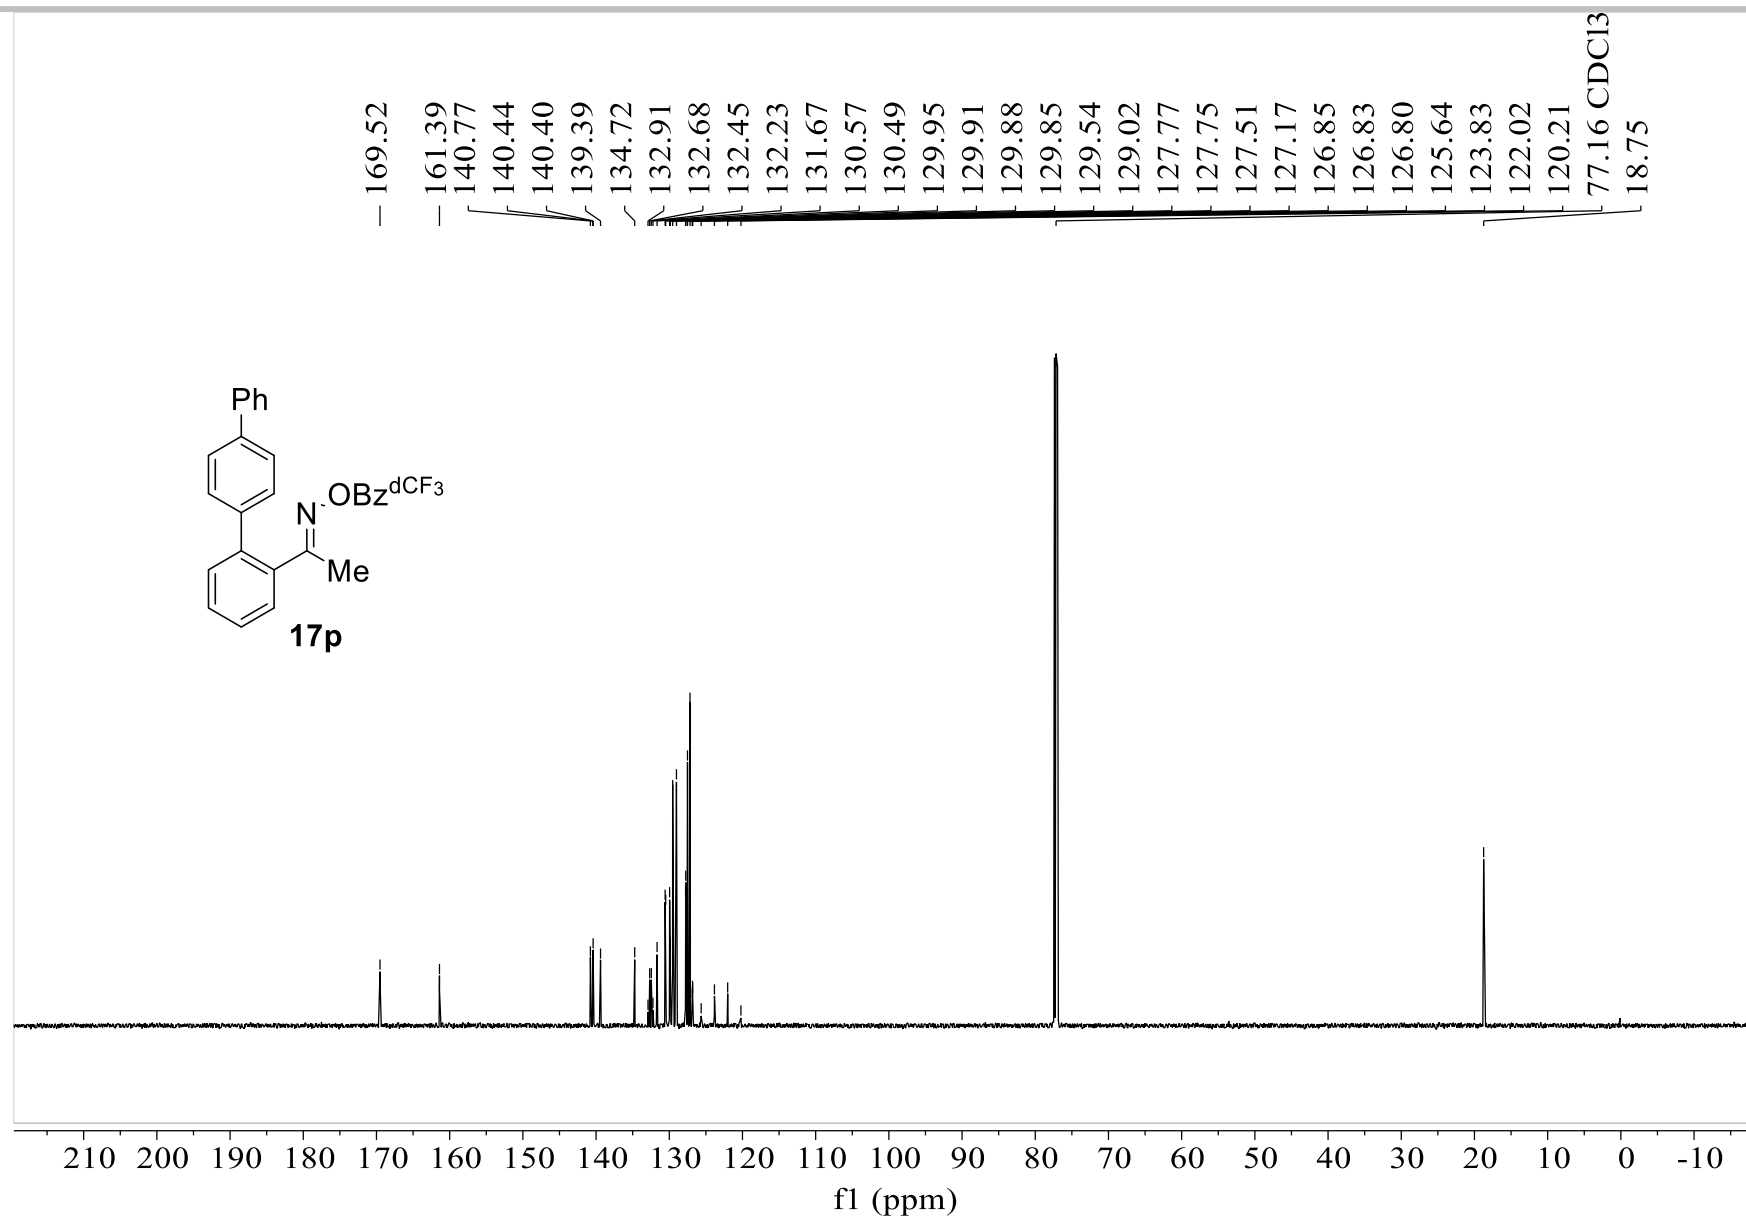

SUPPORTING INFORMATION

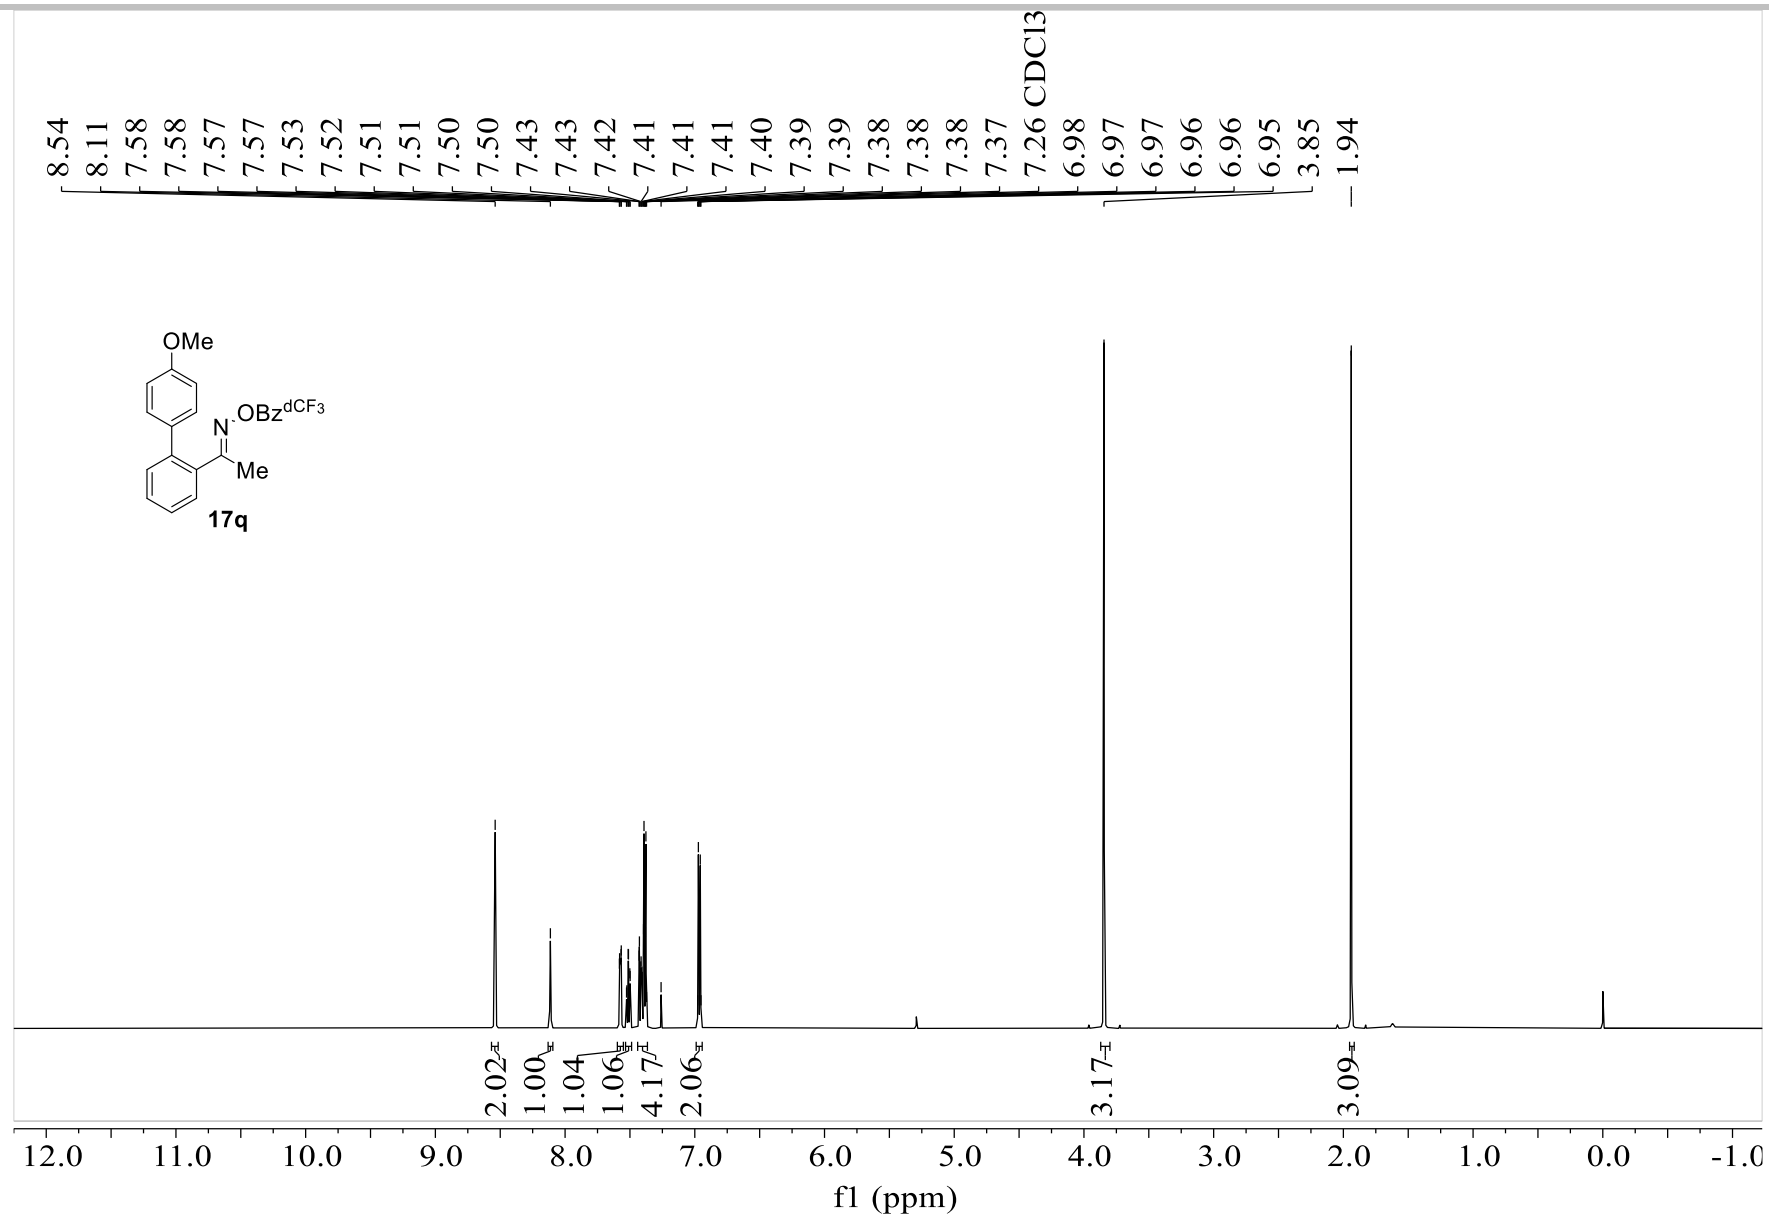



SUPPORTING INFORMATION

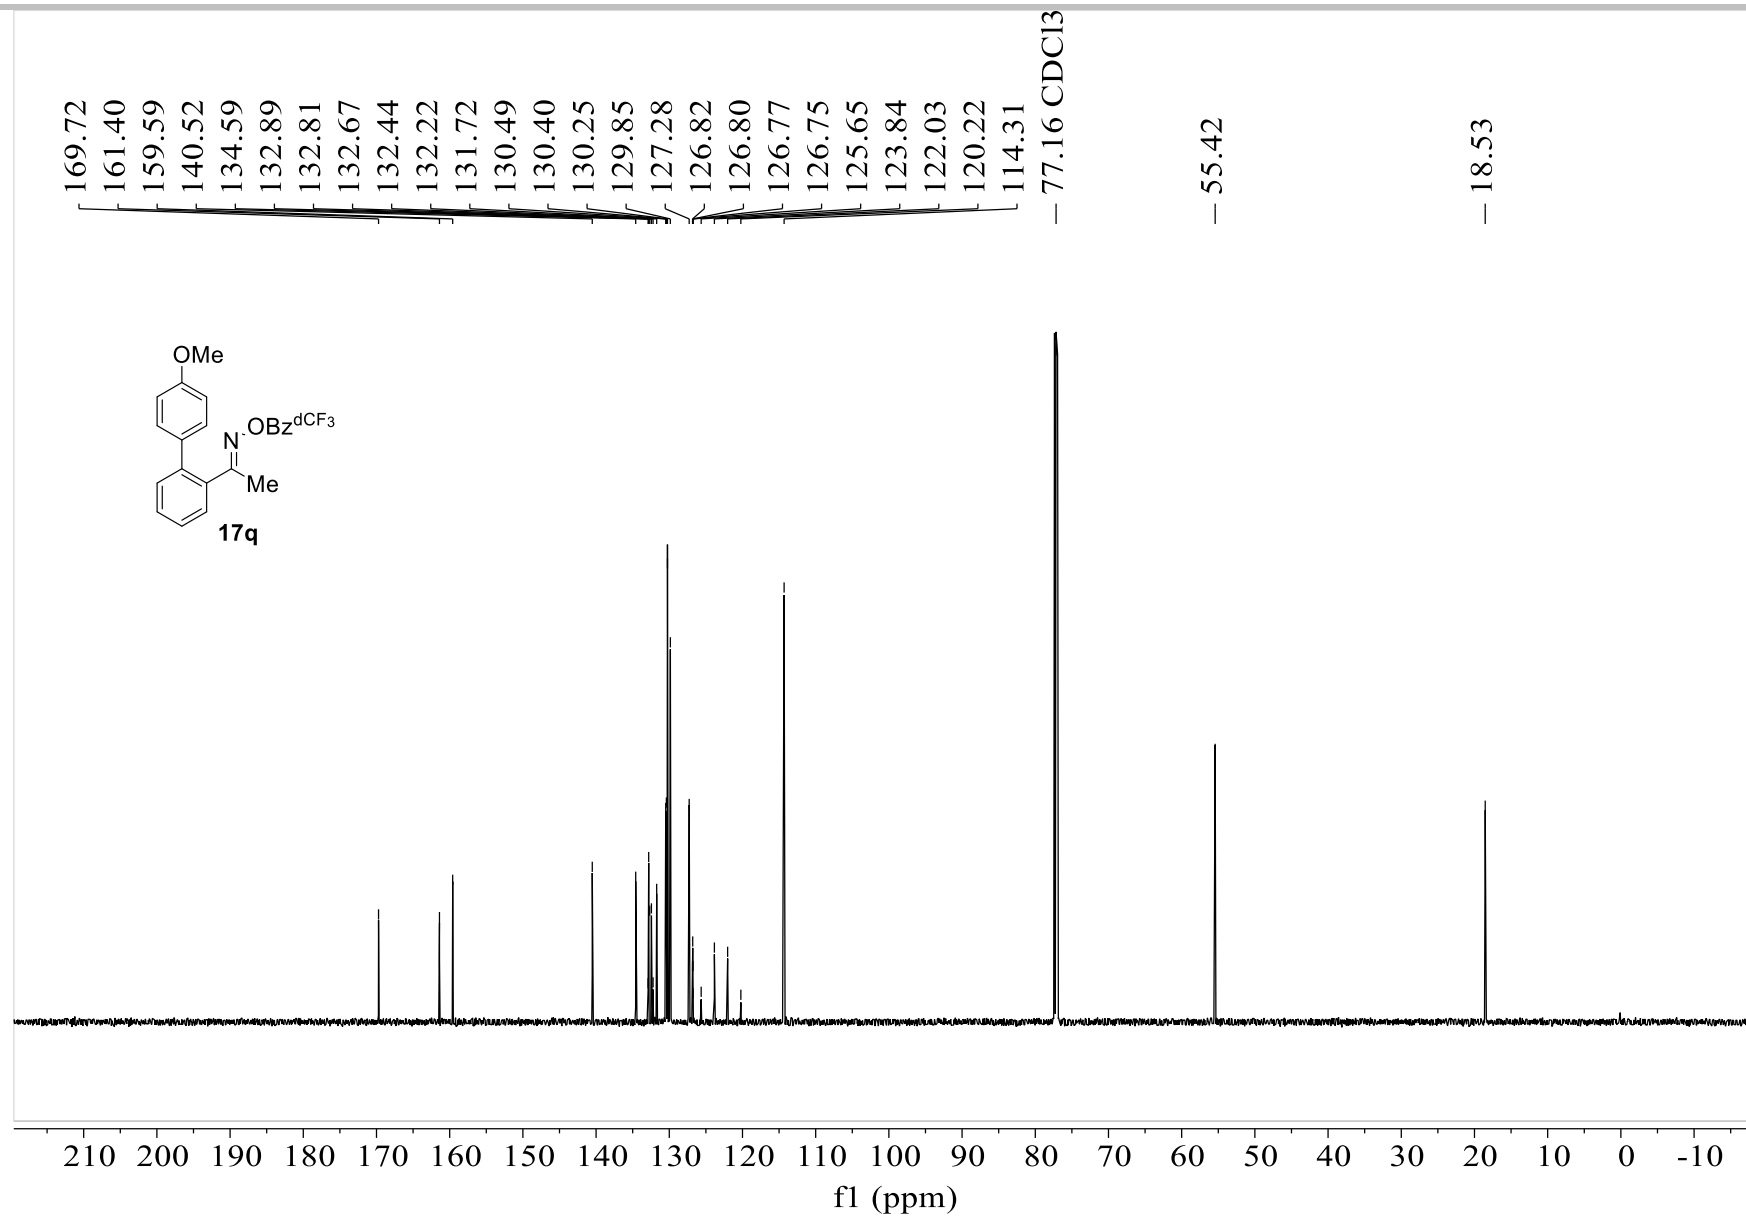

SUPPORTING INFORMATION

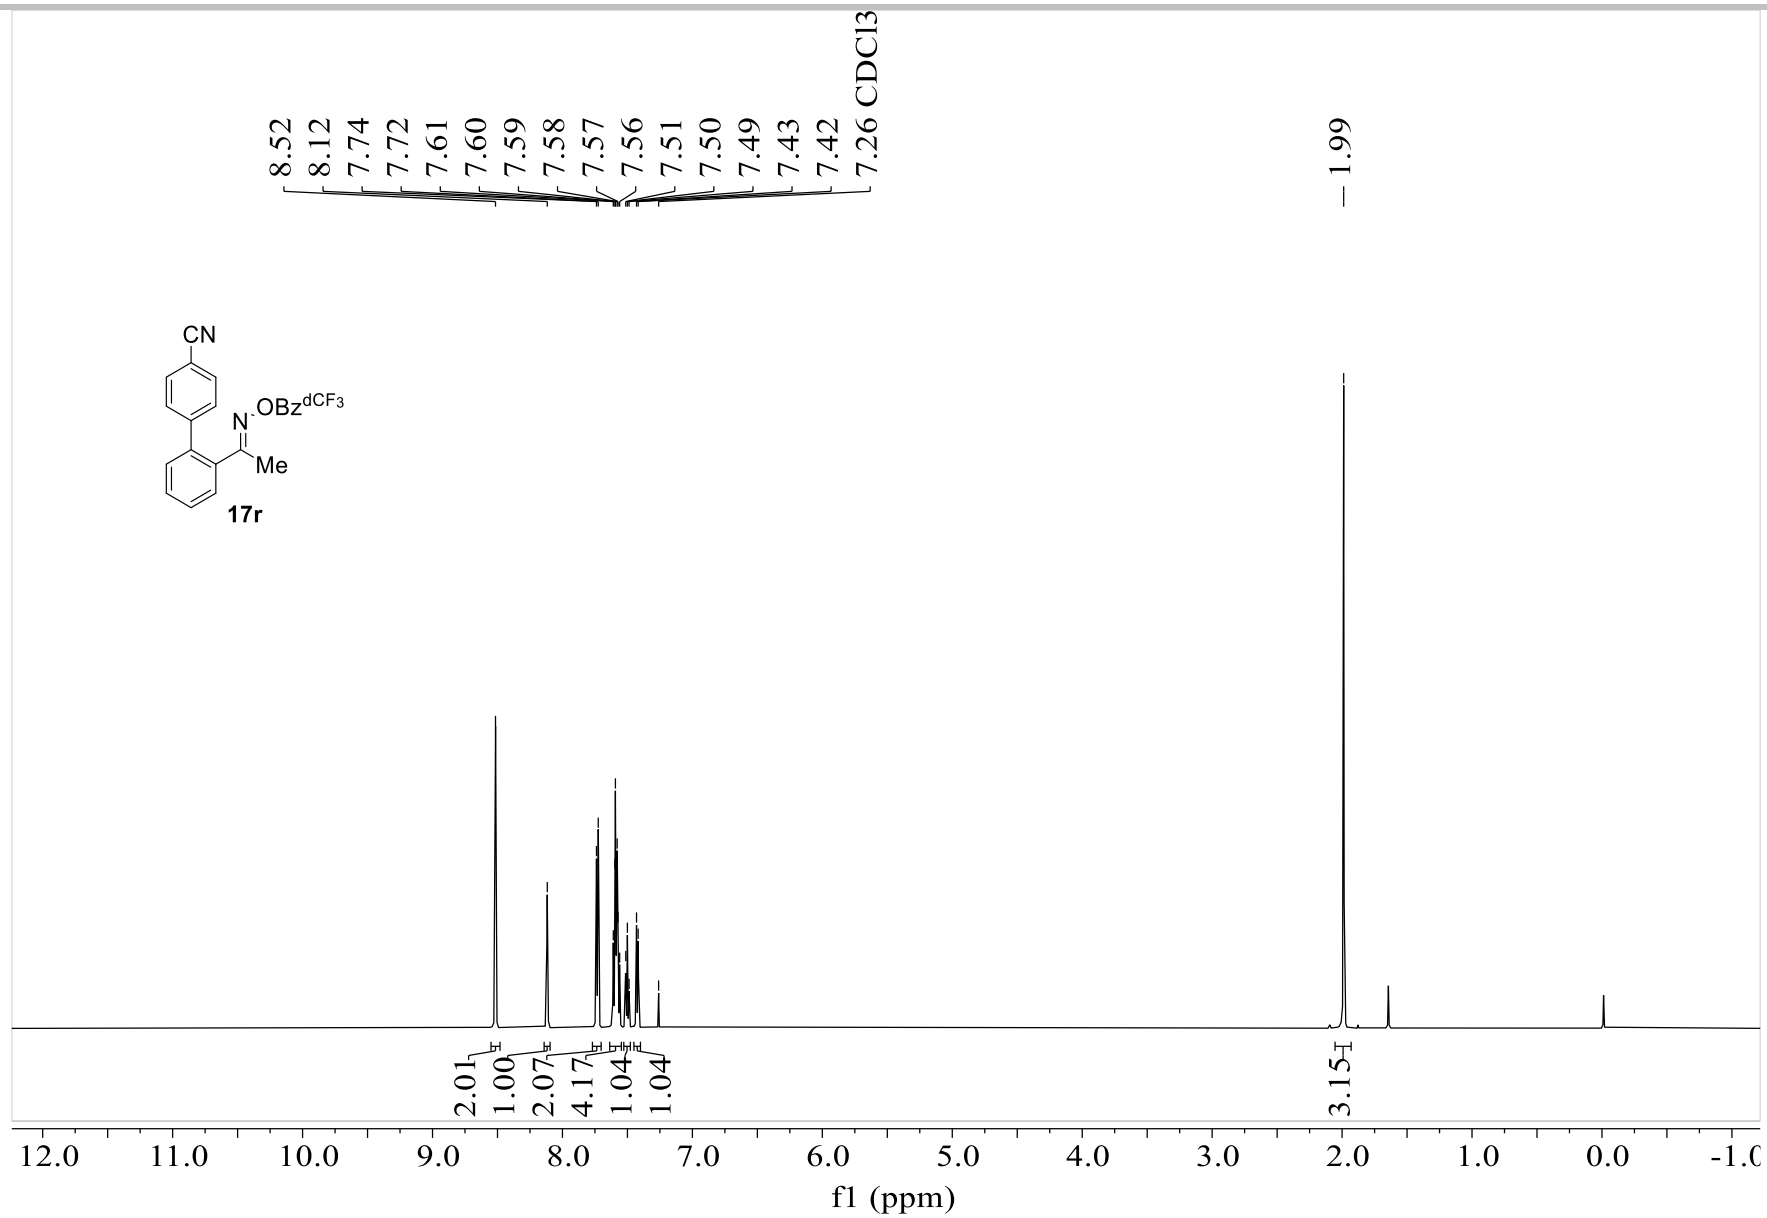

SUPPORTING INFORMATION

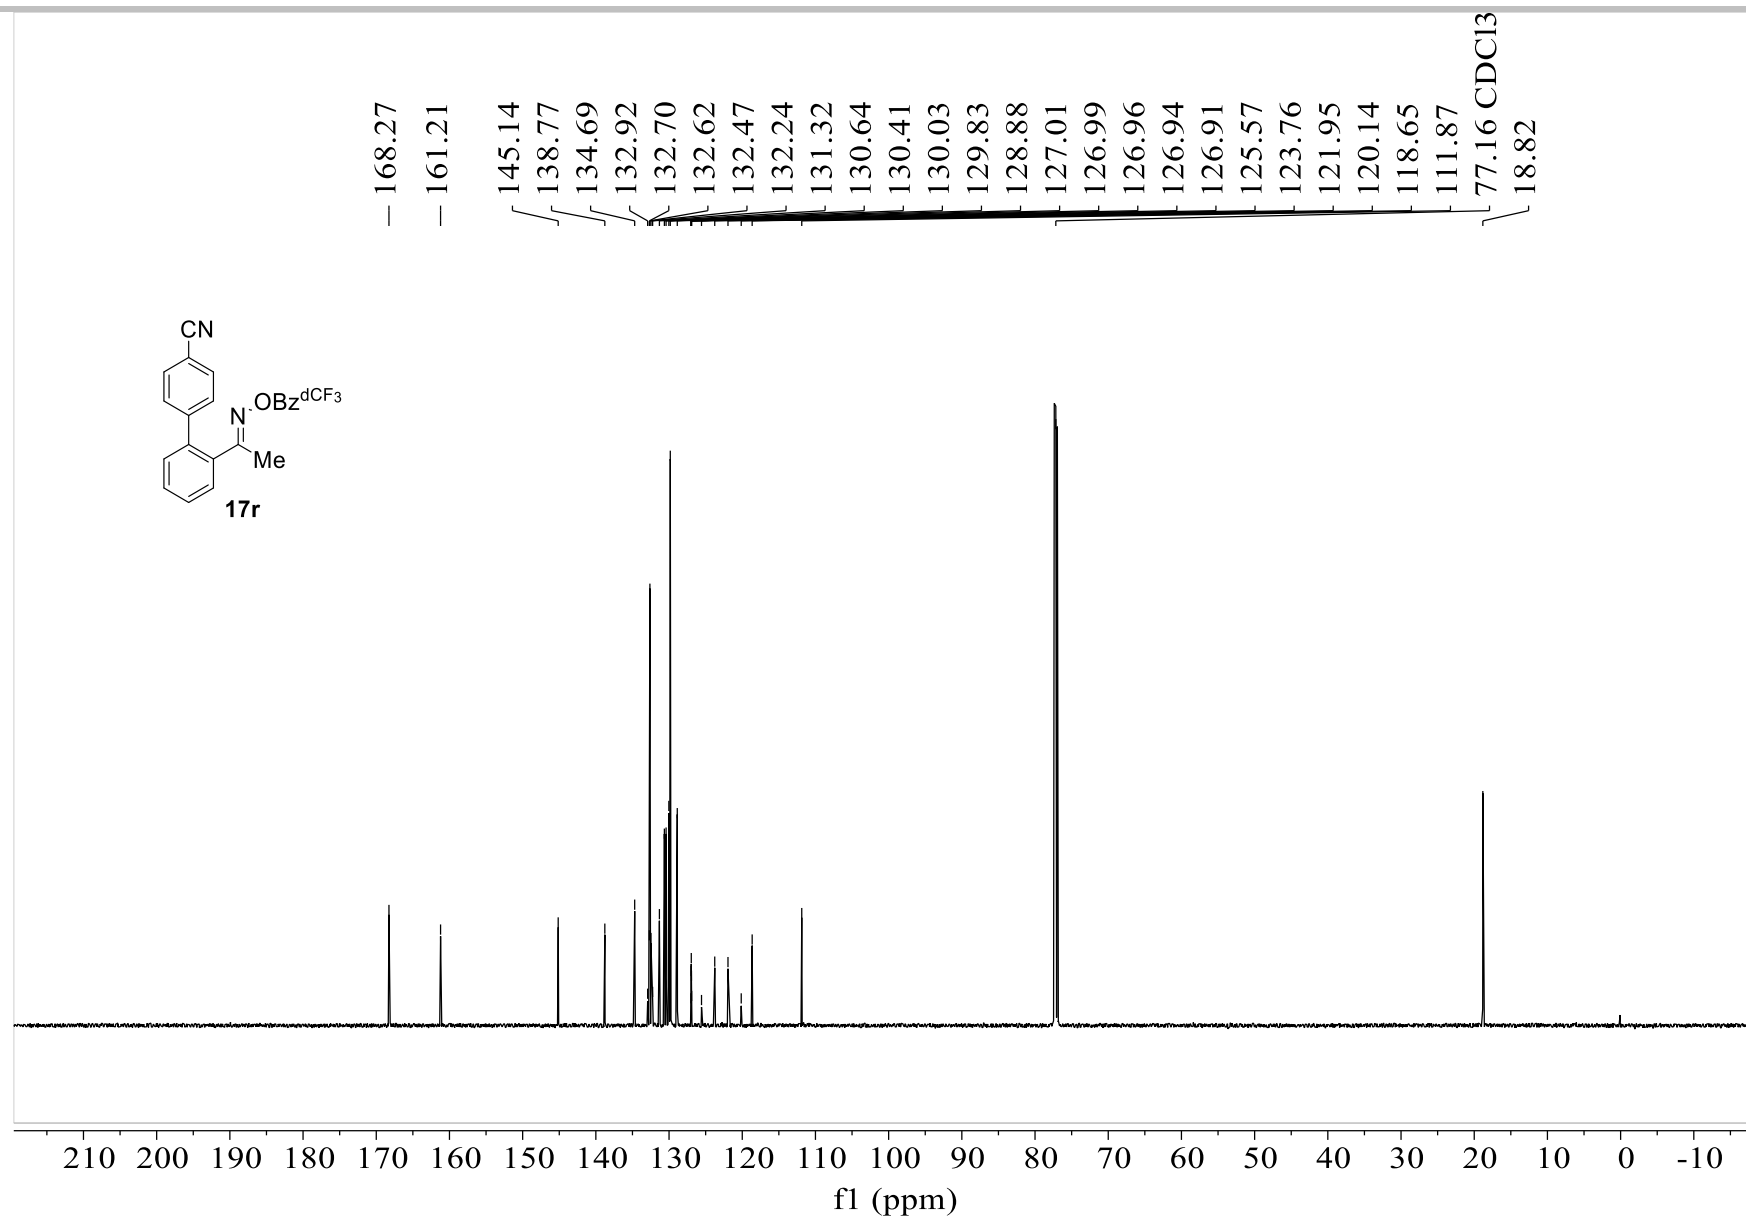

SUPPORTING INFORMATION

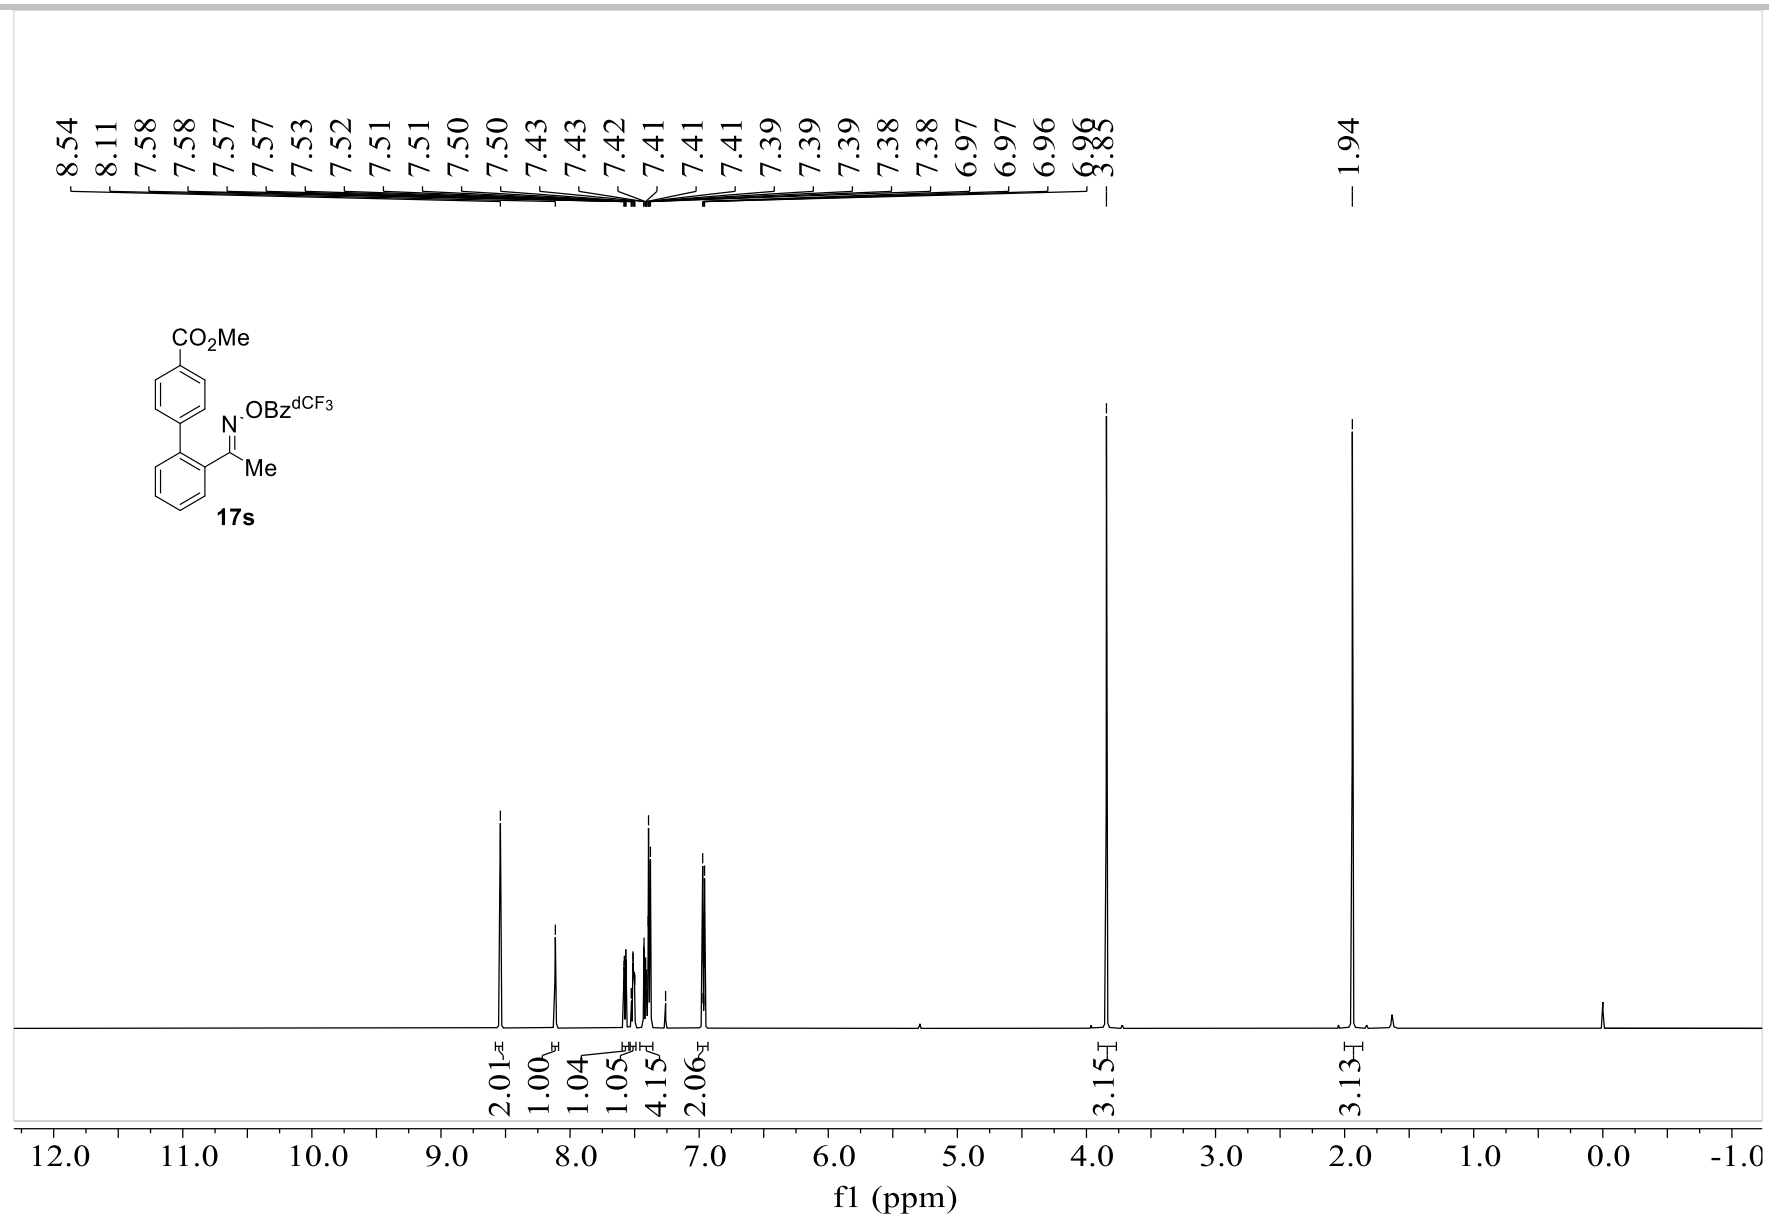

SUPPORTING INFORMATION

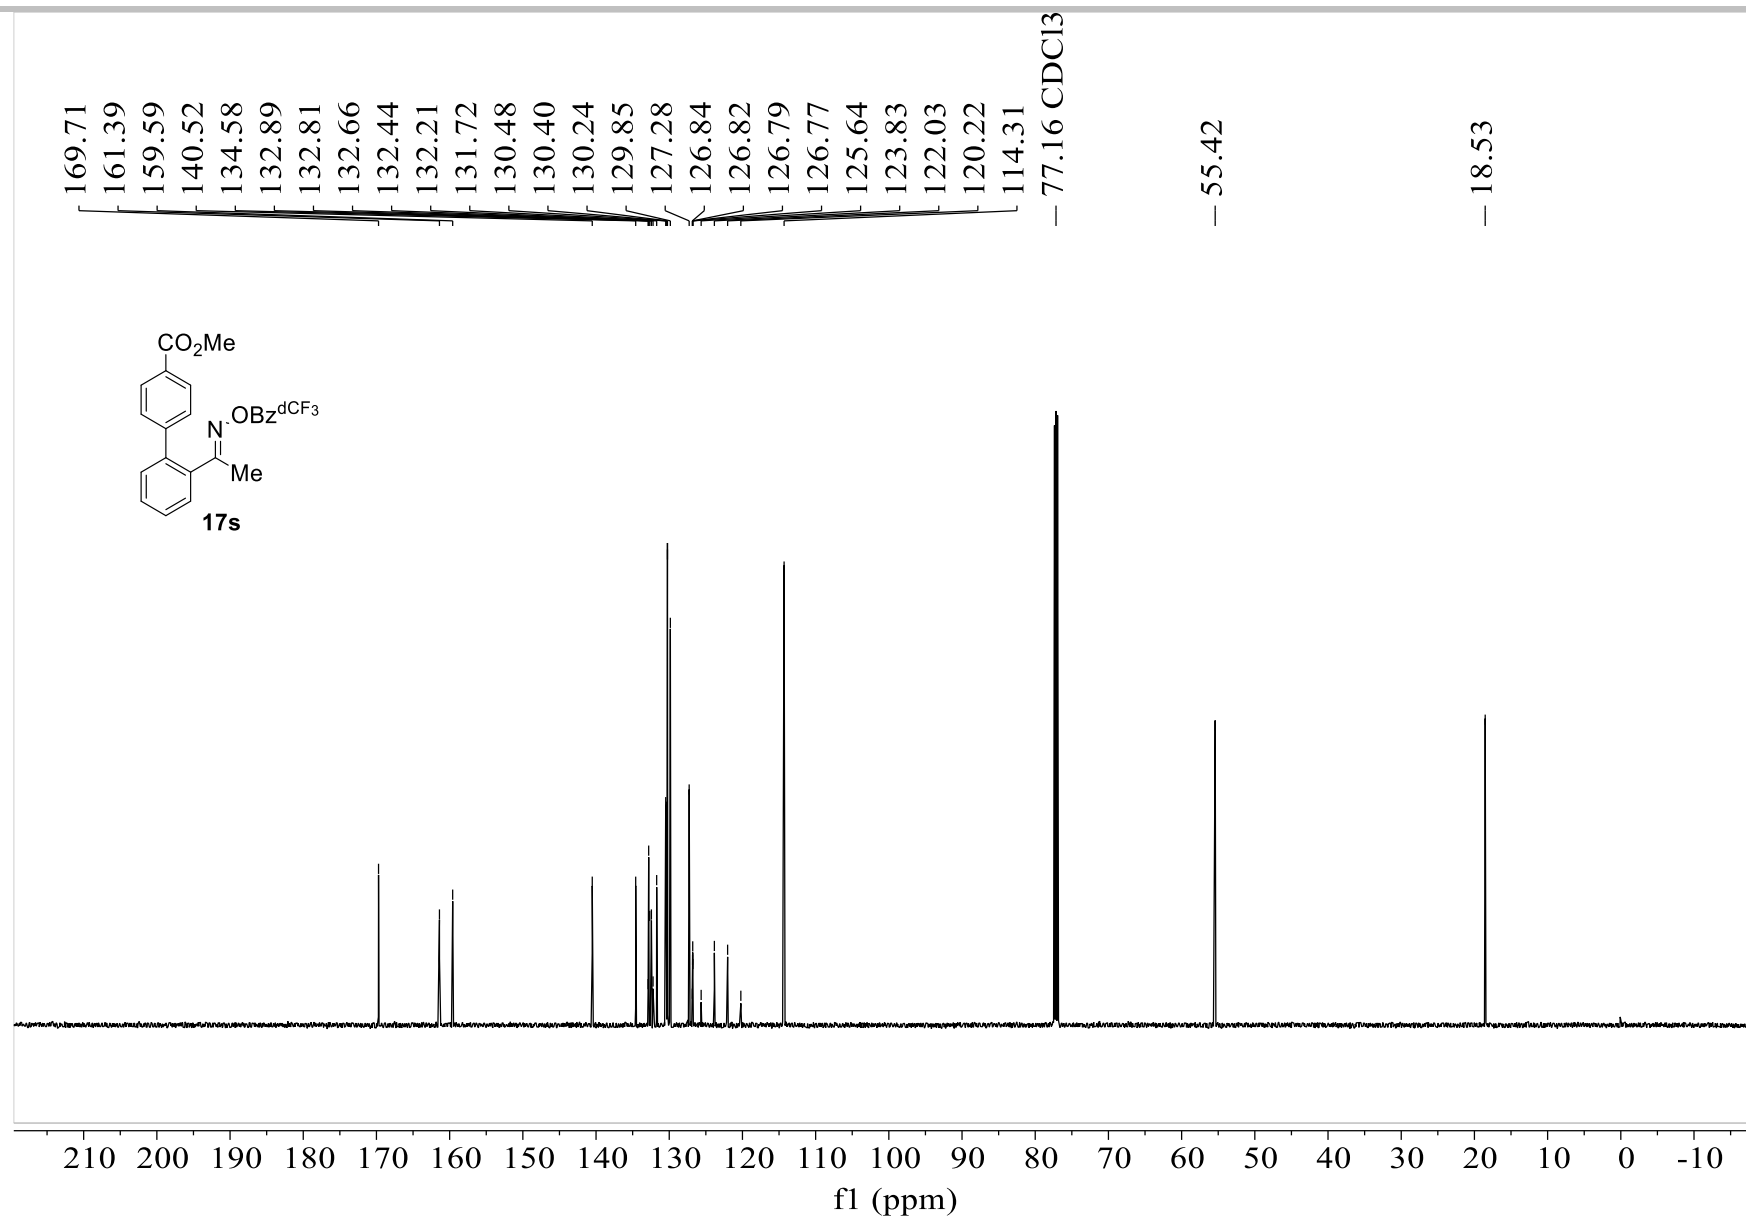

SUPPORTING INFORMATION

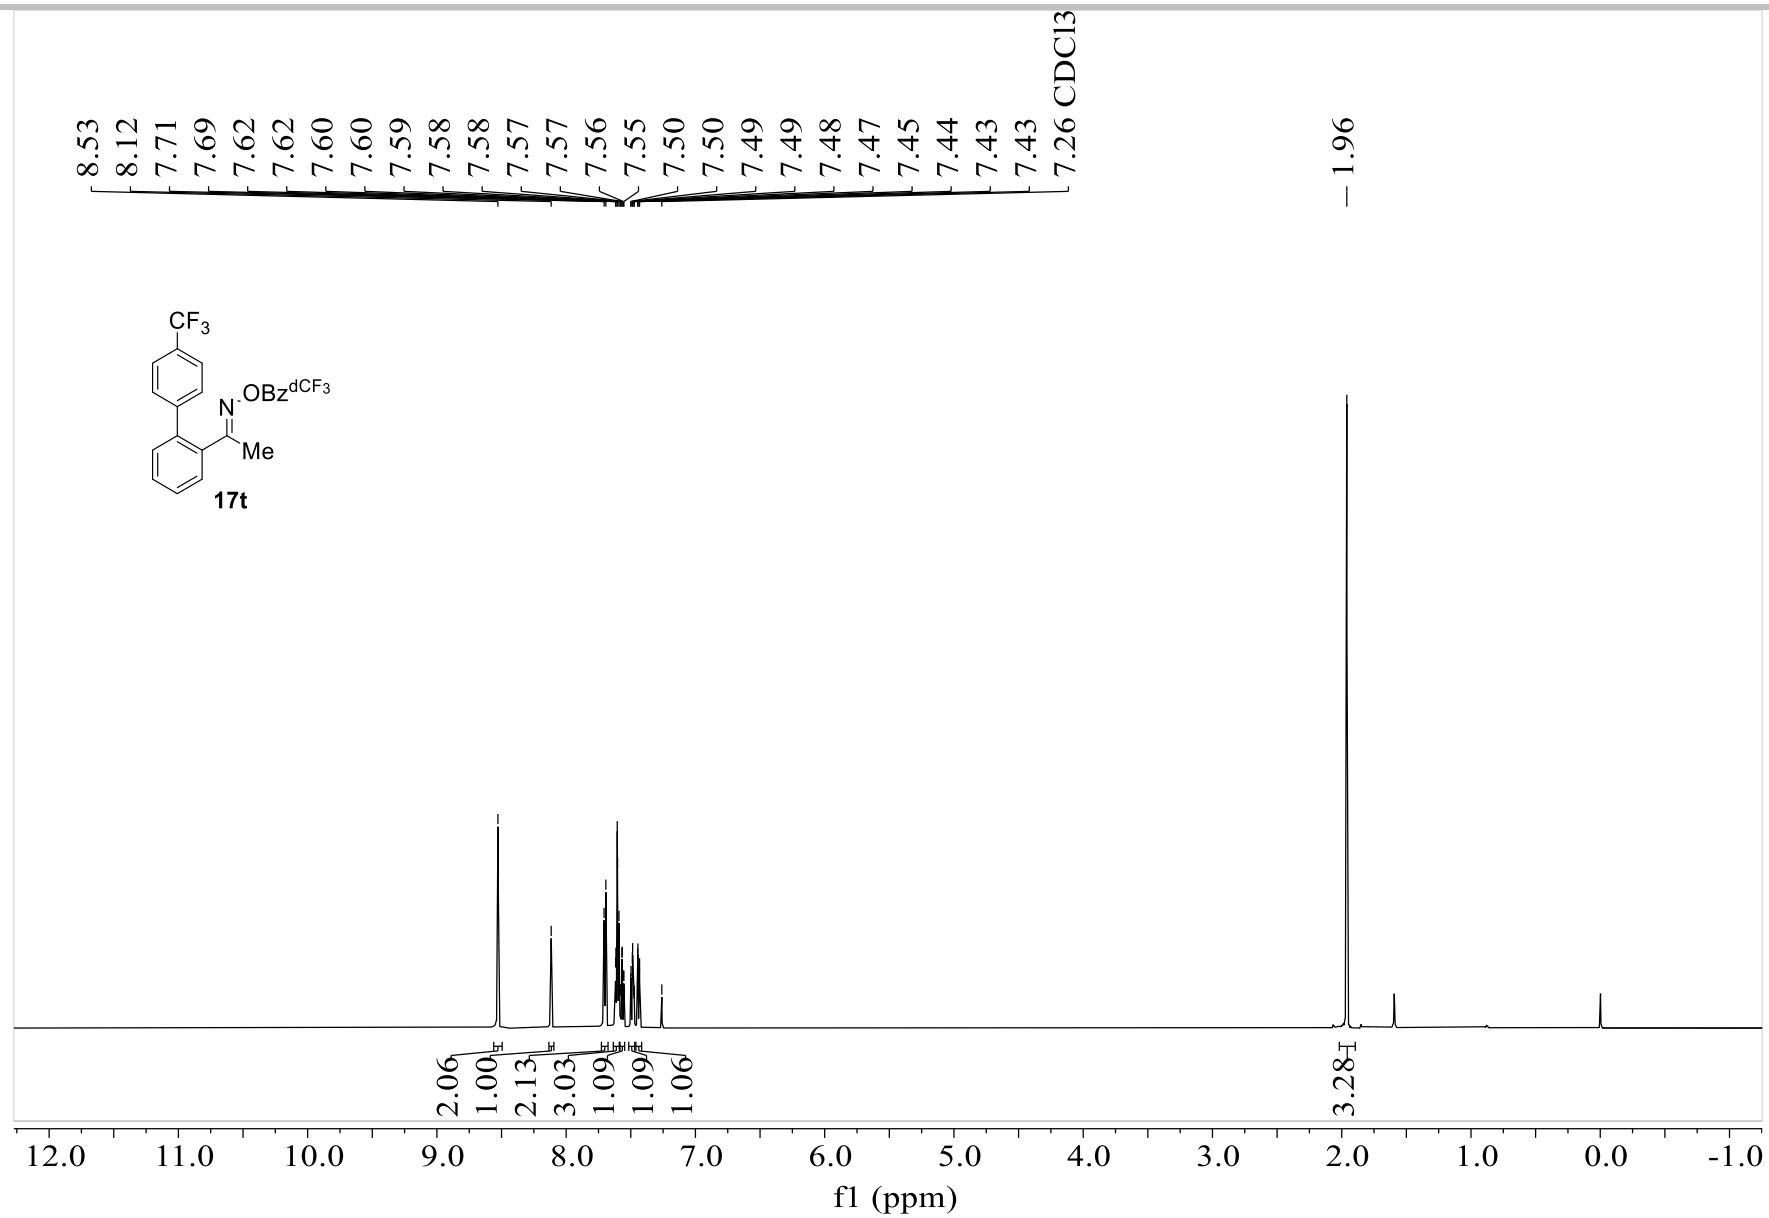

SUPPORTING INFORMATION

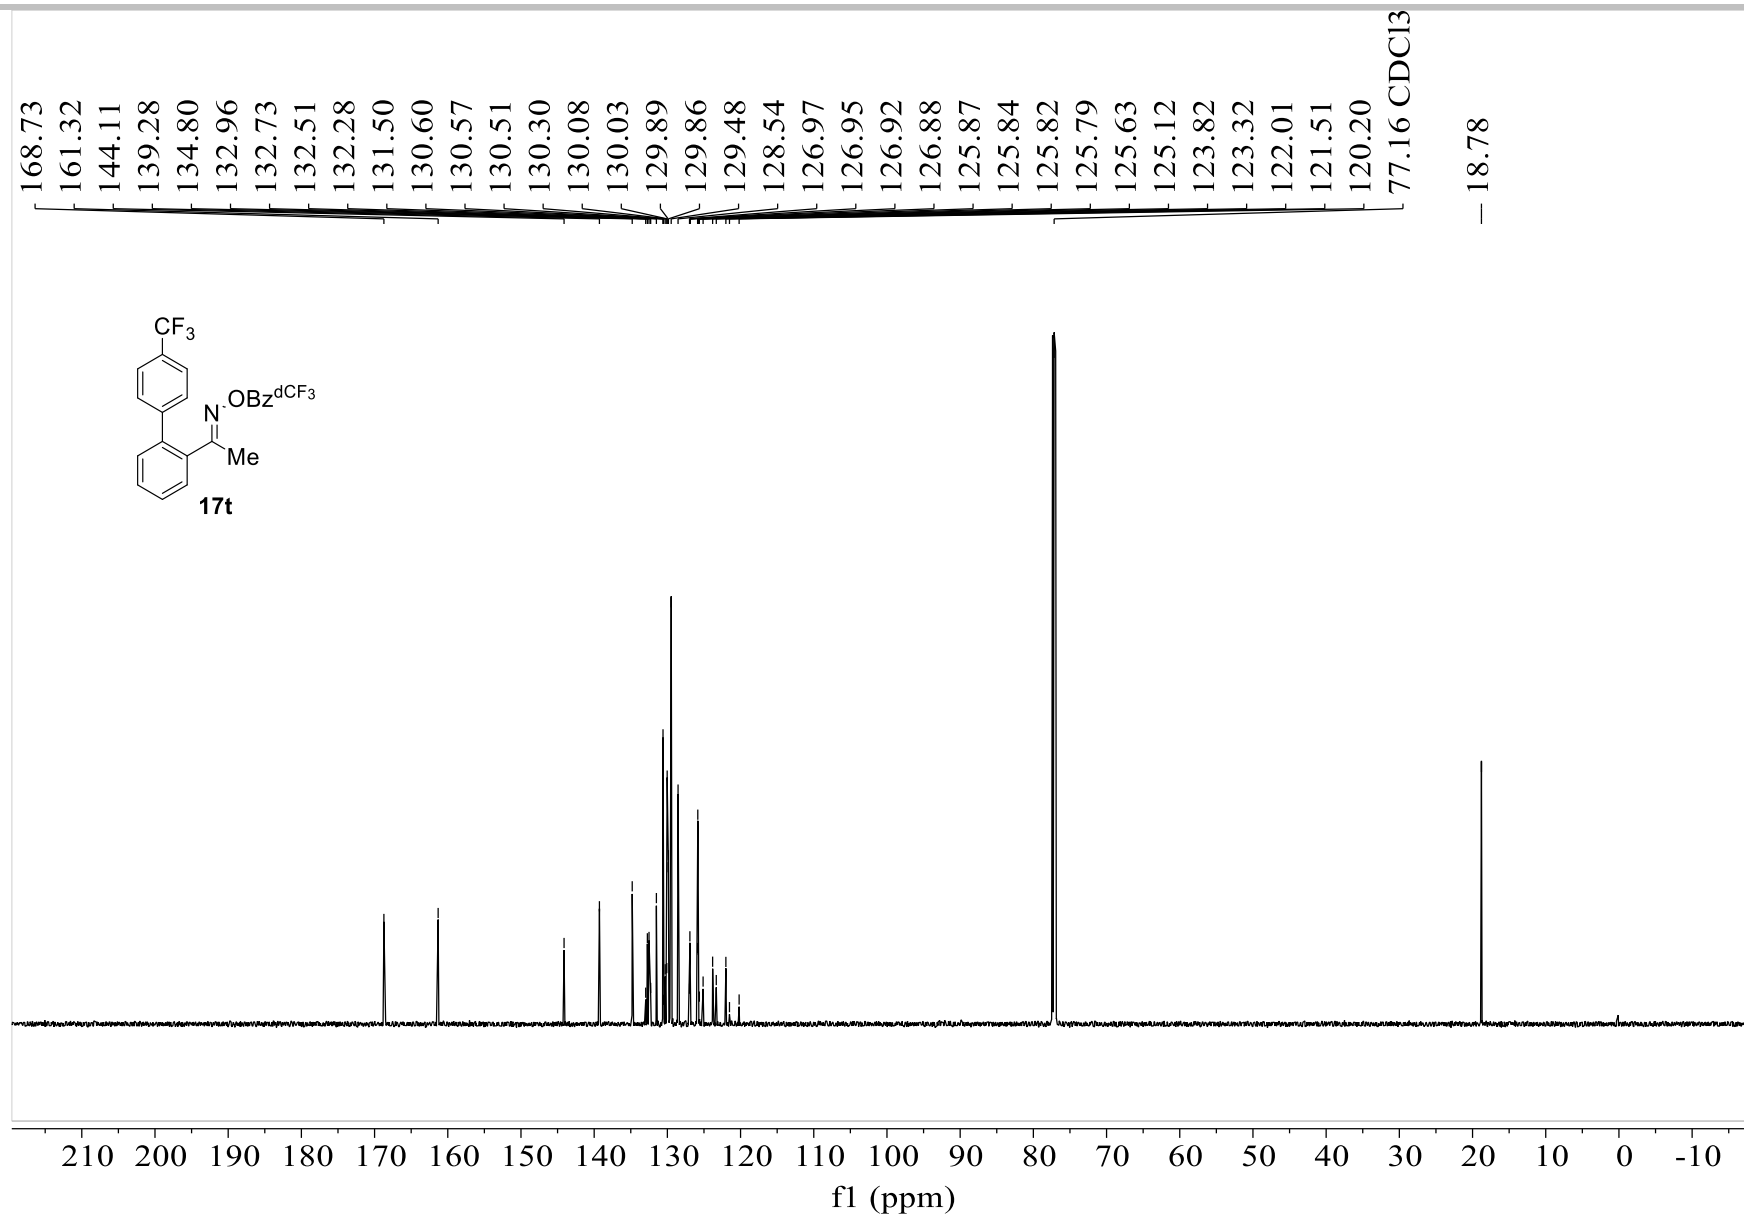

# SUPPORTING INFORMATION

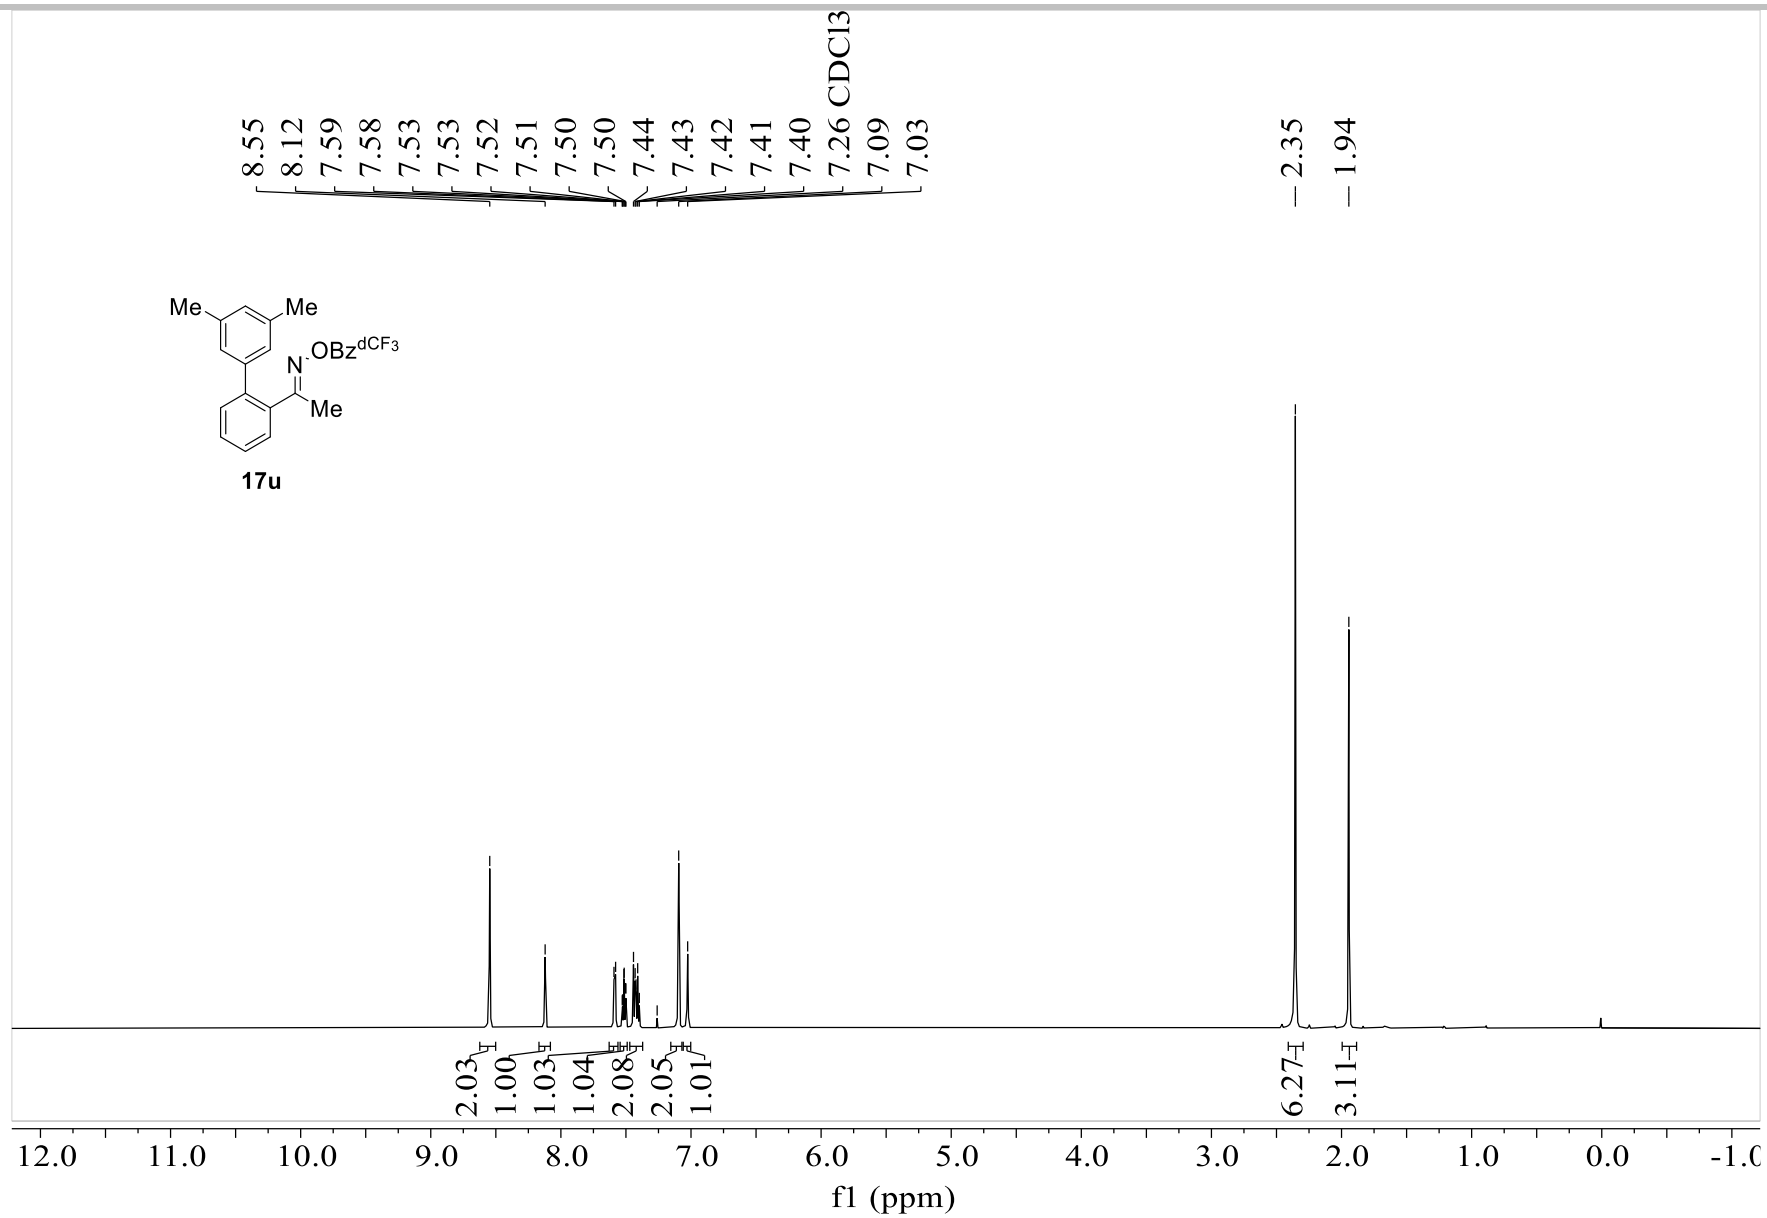



SUPPORTING INFORMATION

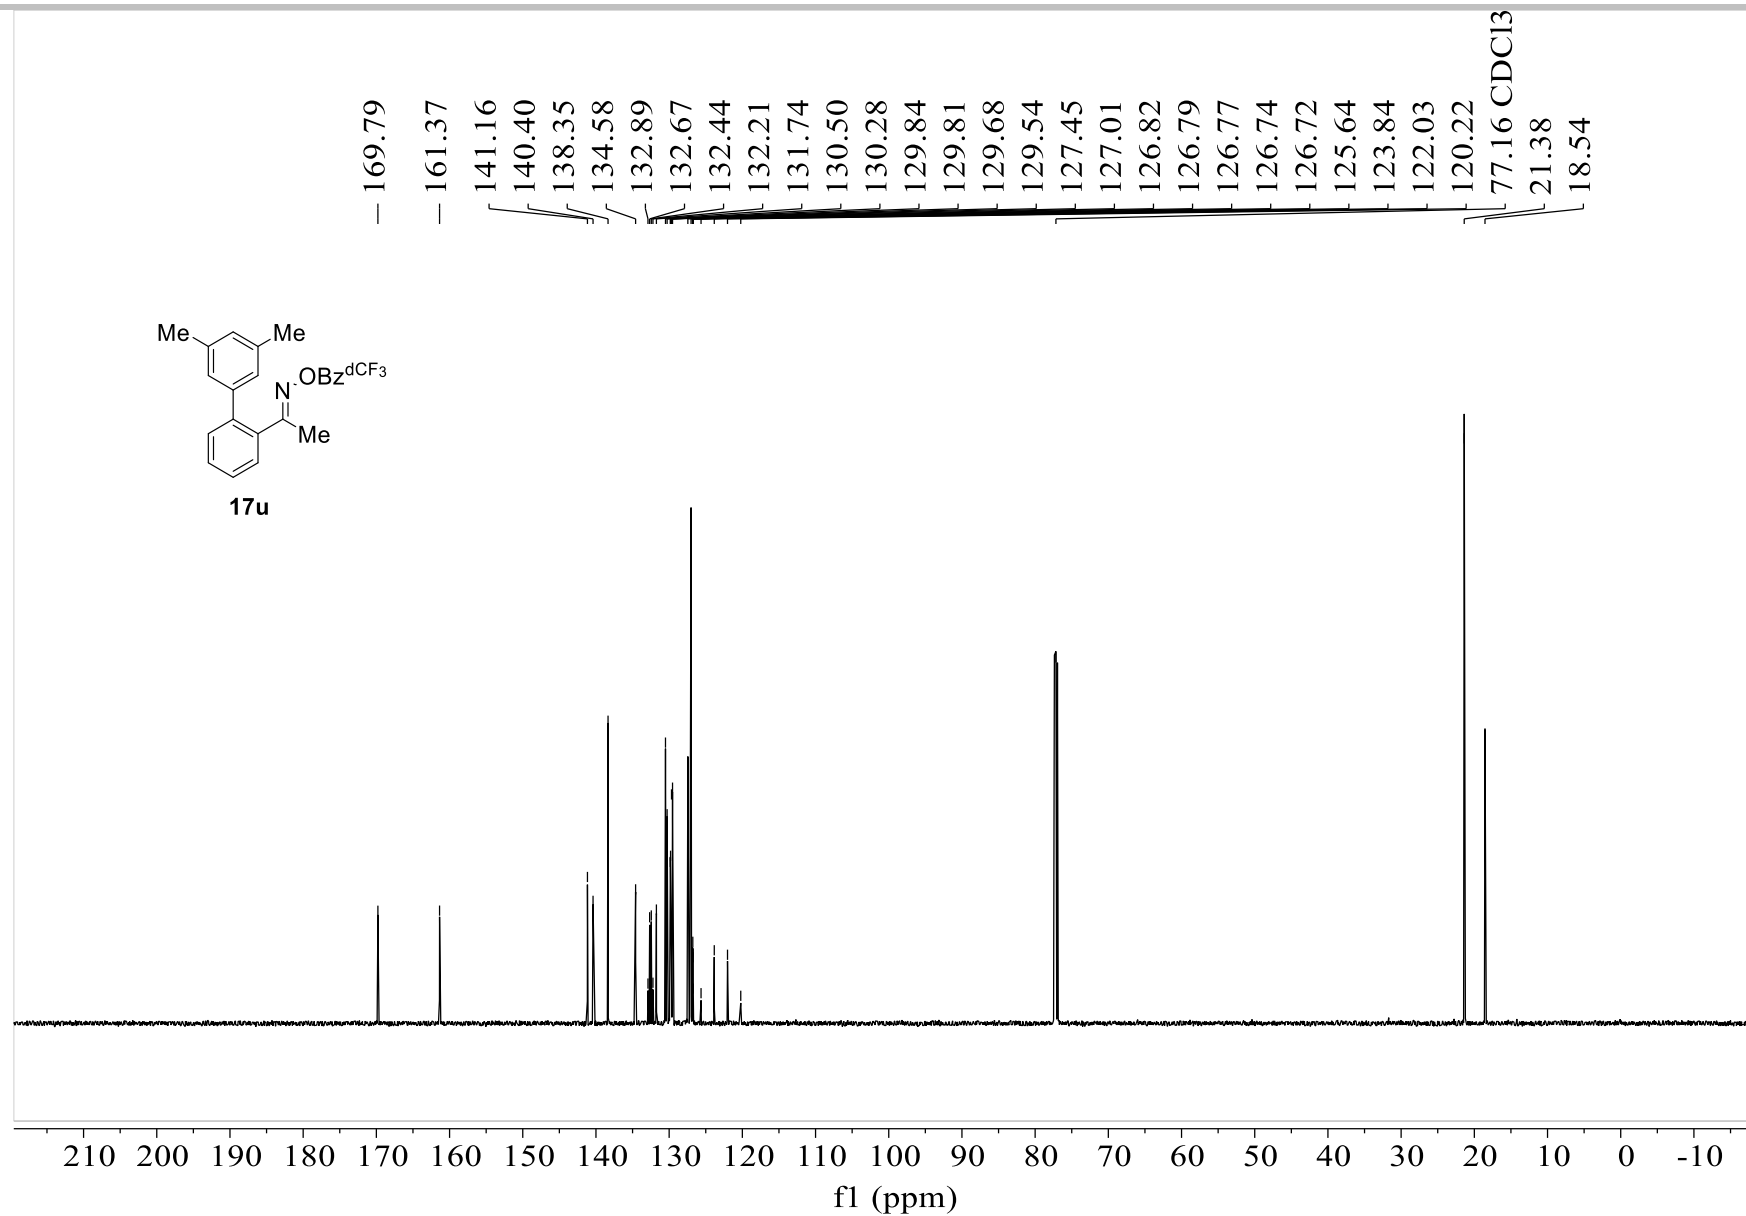

# SUPPORTING INFORMATION

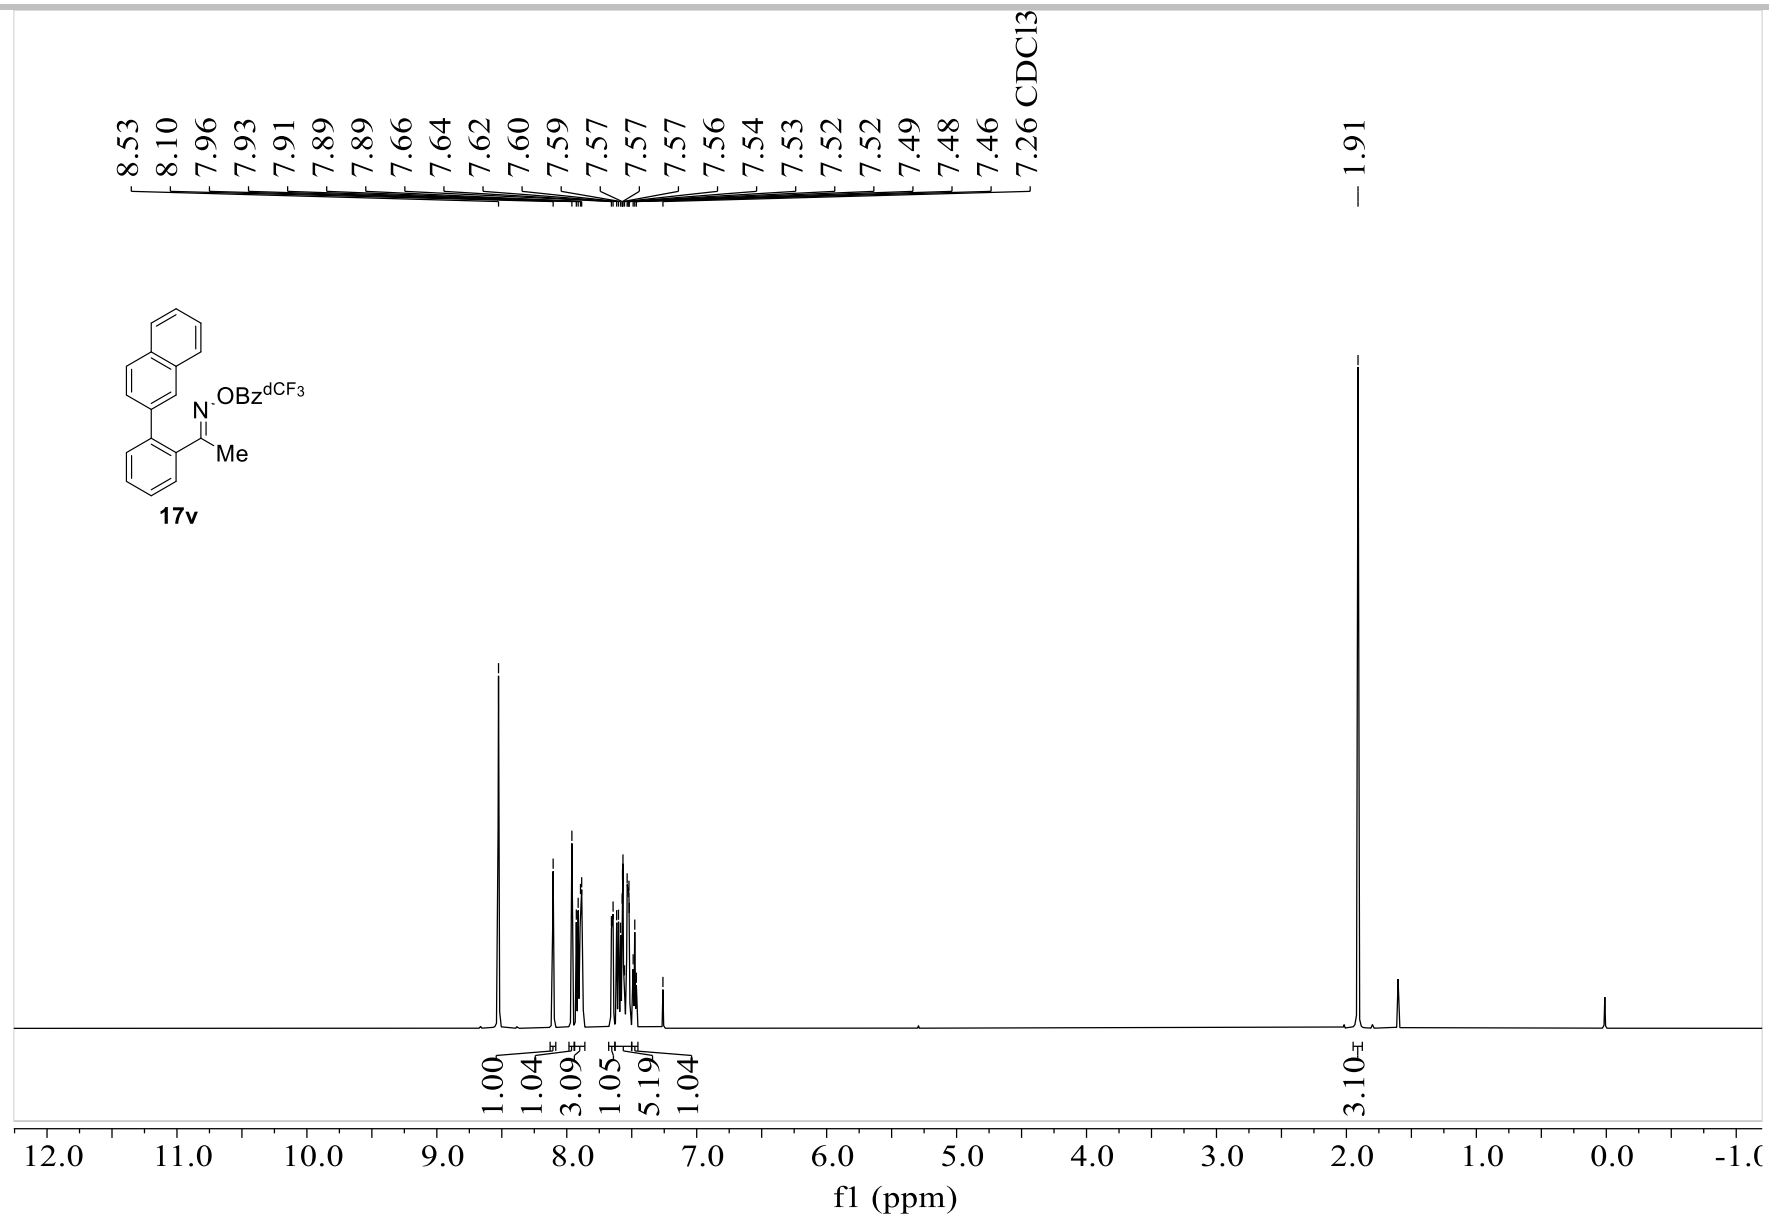

# SUPPORTING INFORMATION

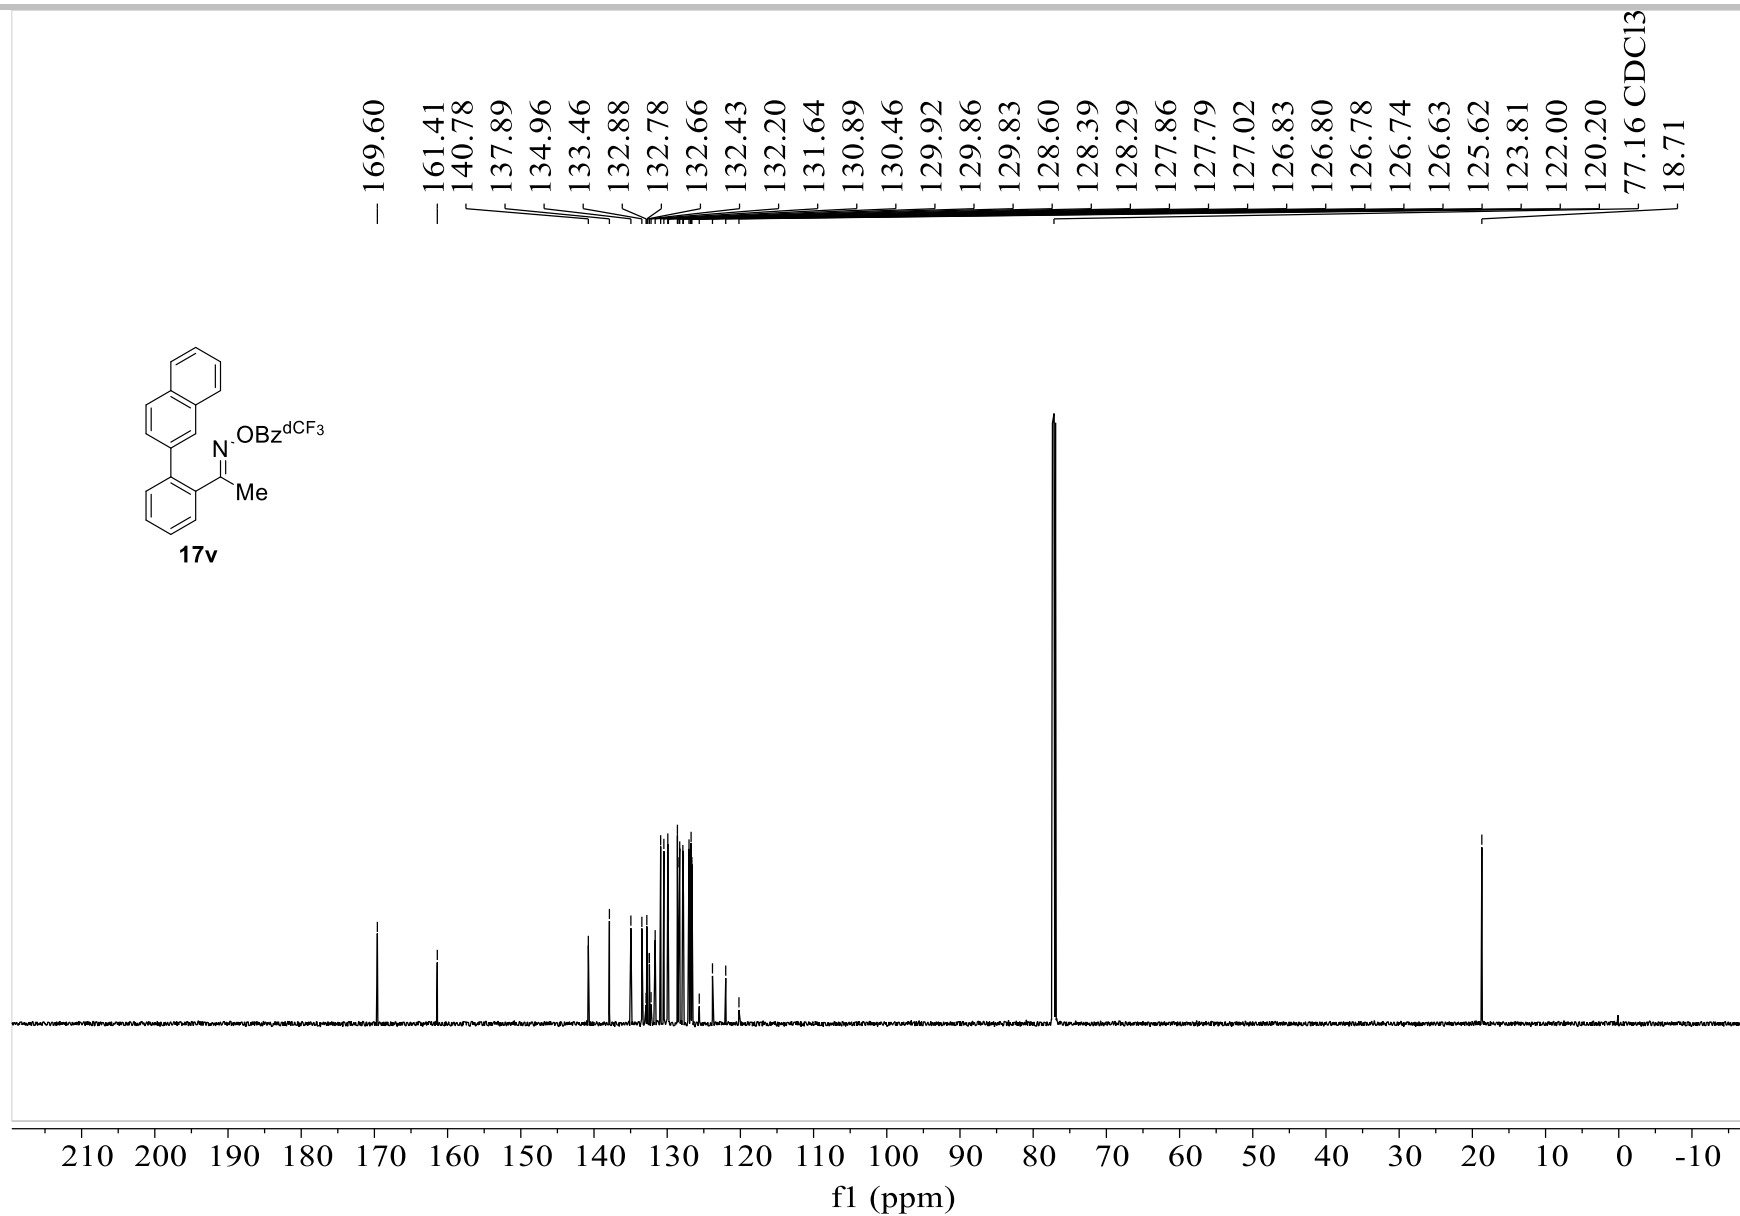

SUPPORTING INFORMATION

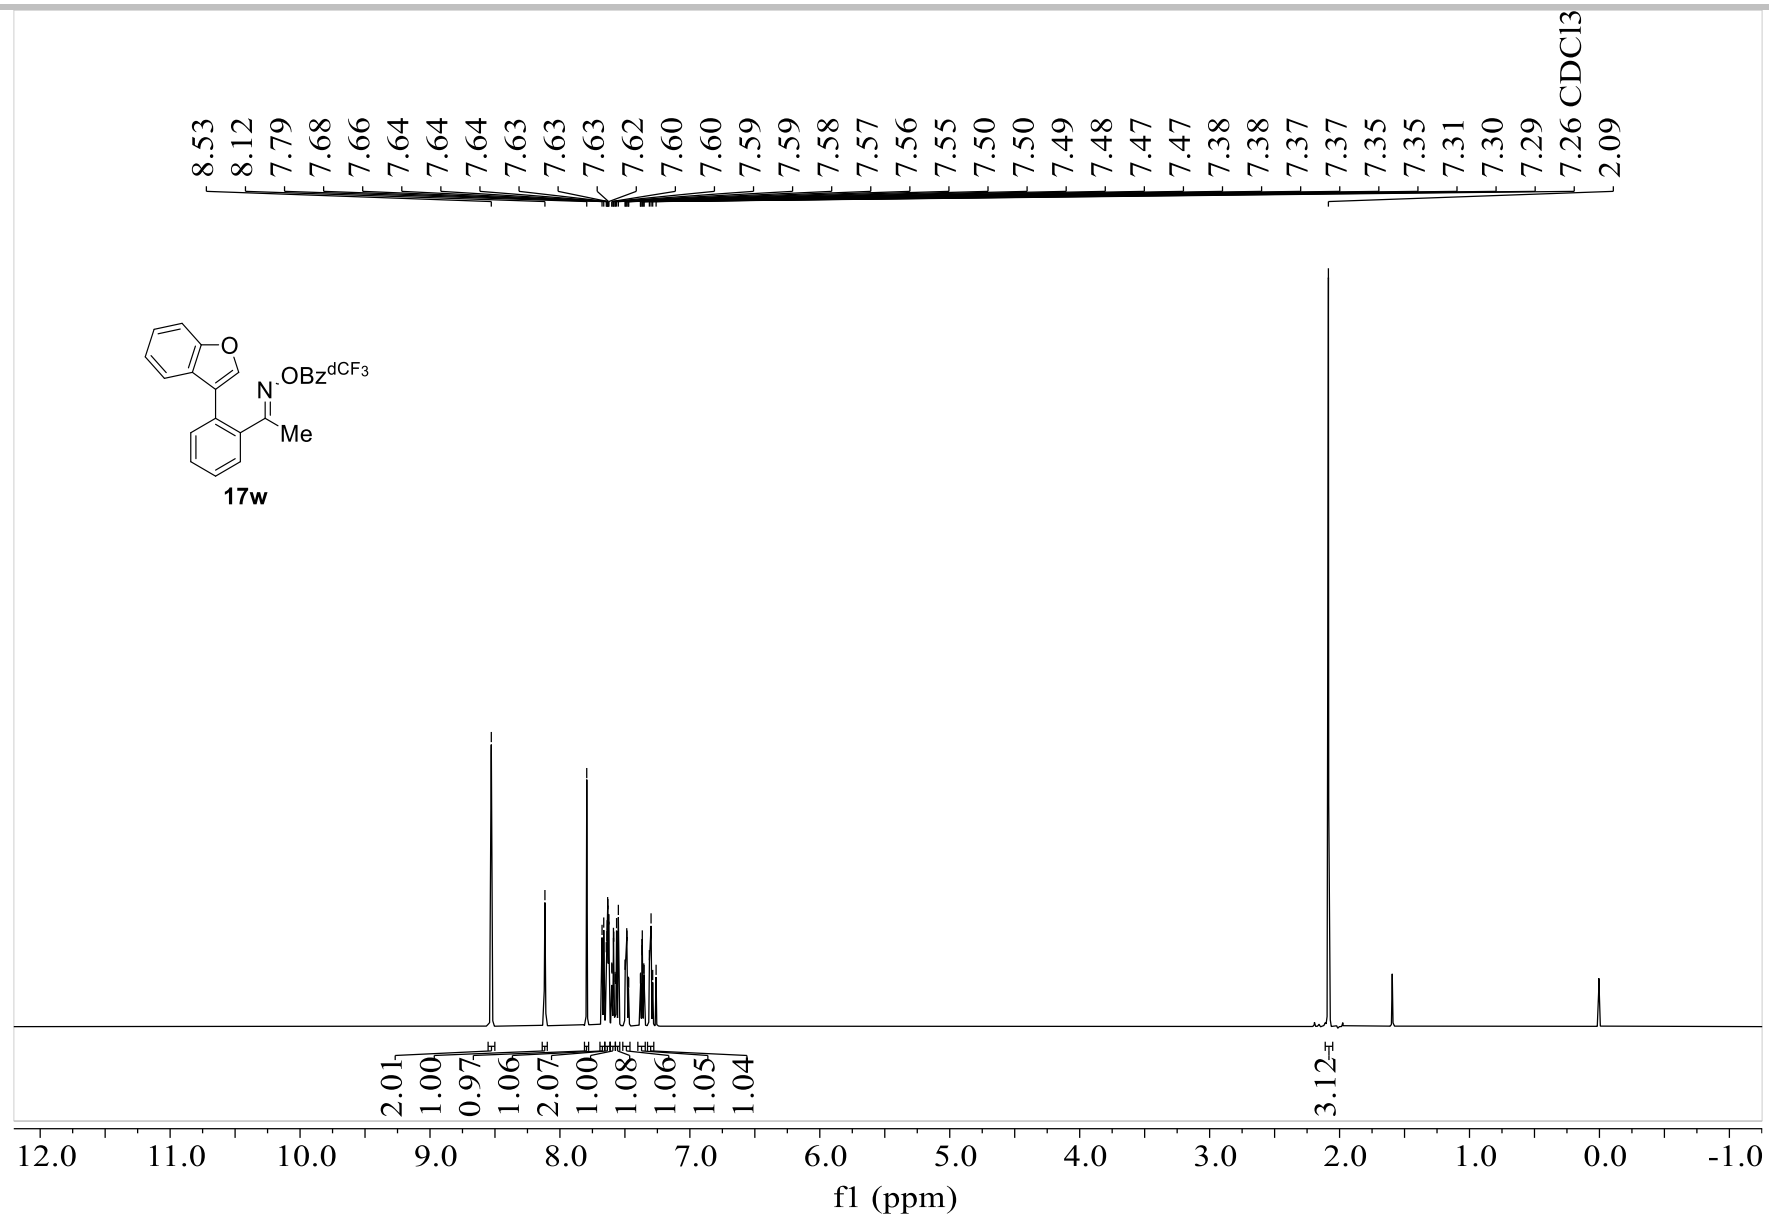

SUPPORTING INFORMATION

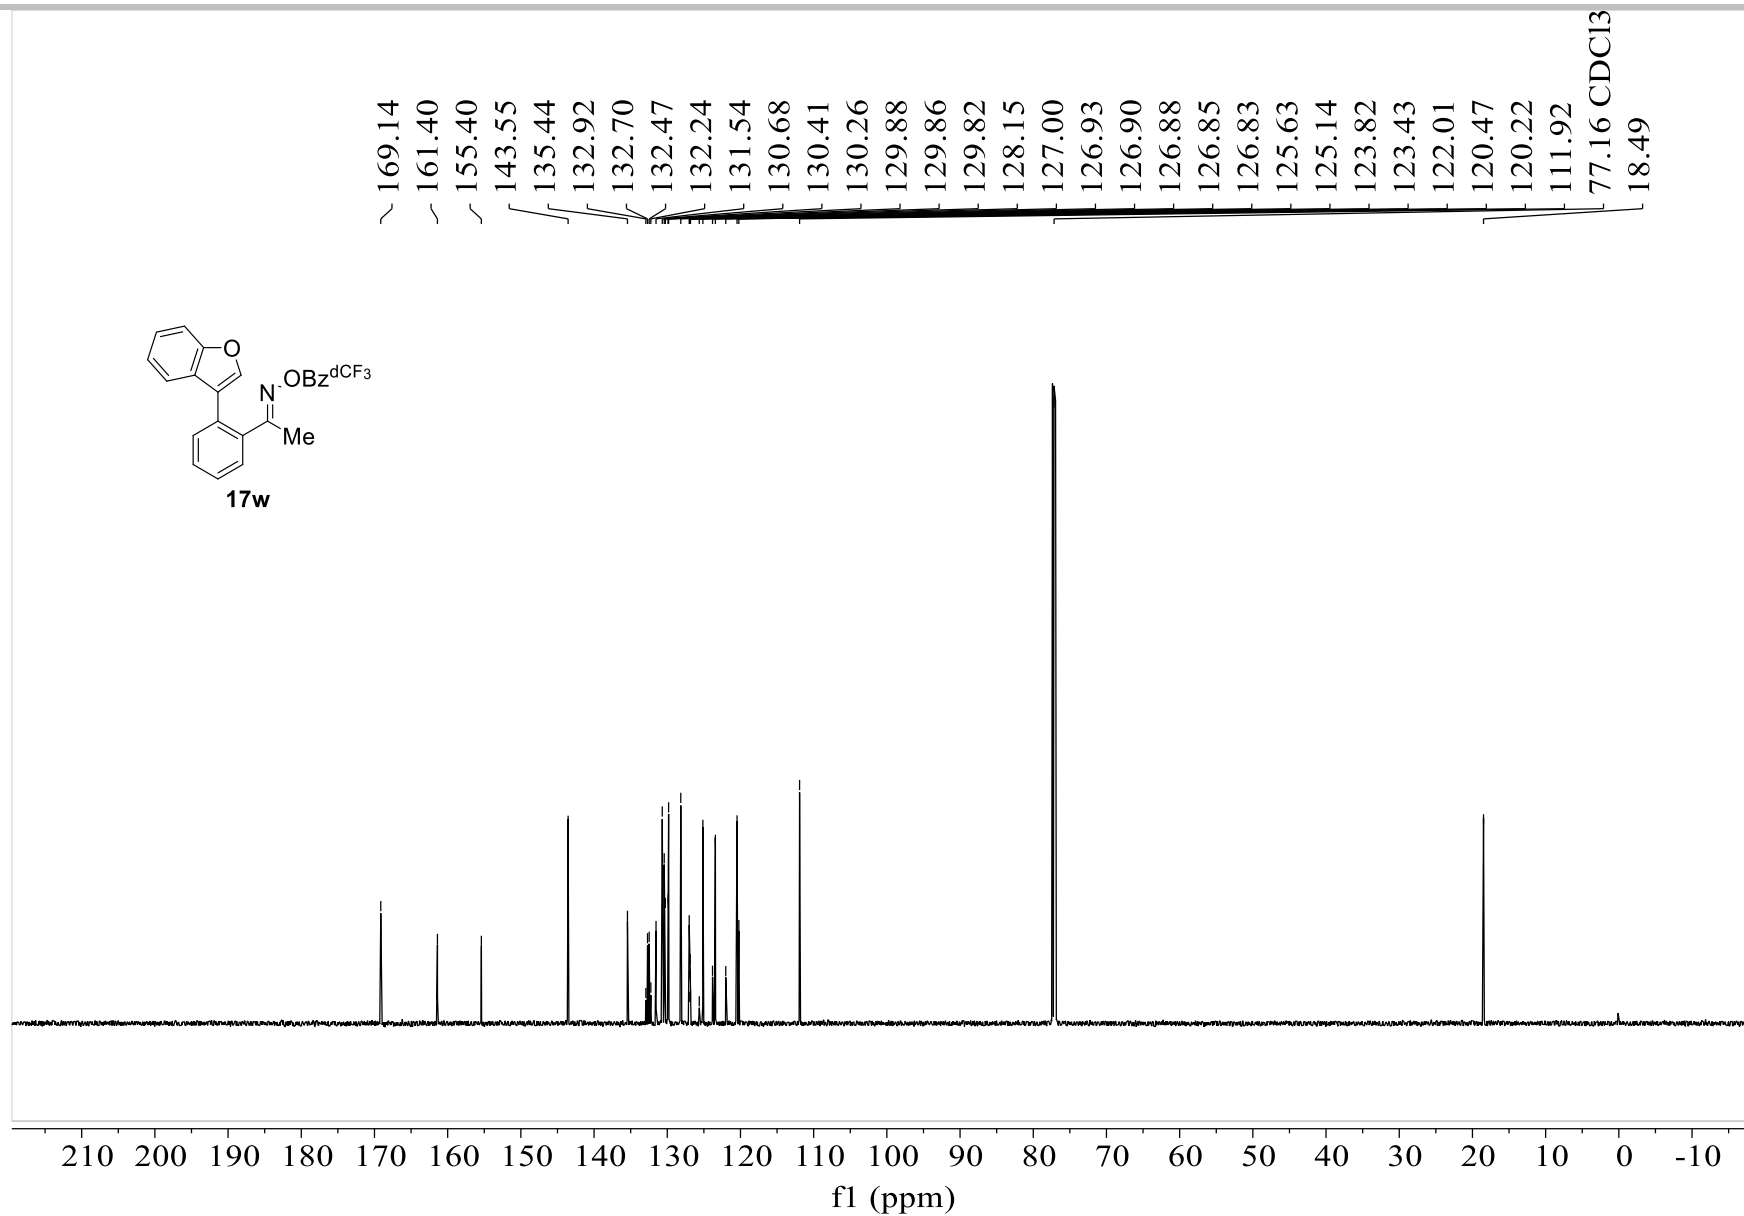

SUPPORTING INFORMATION

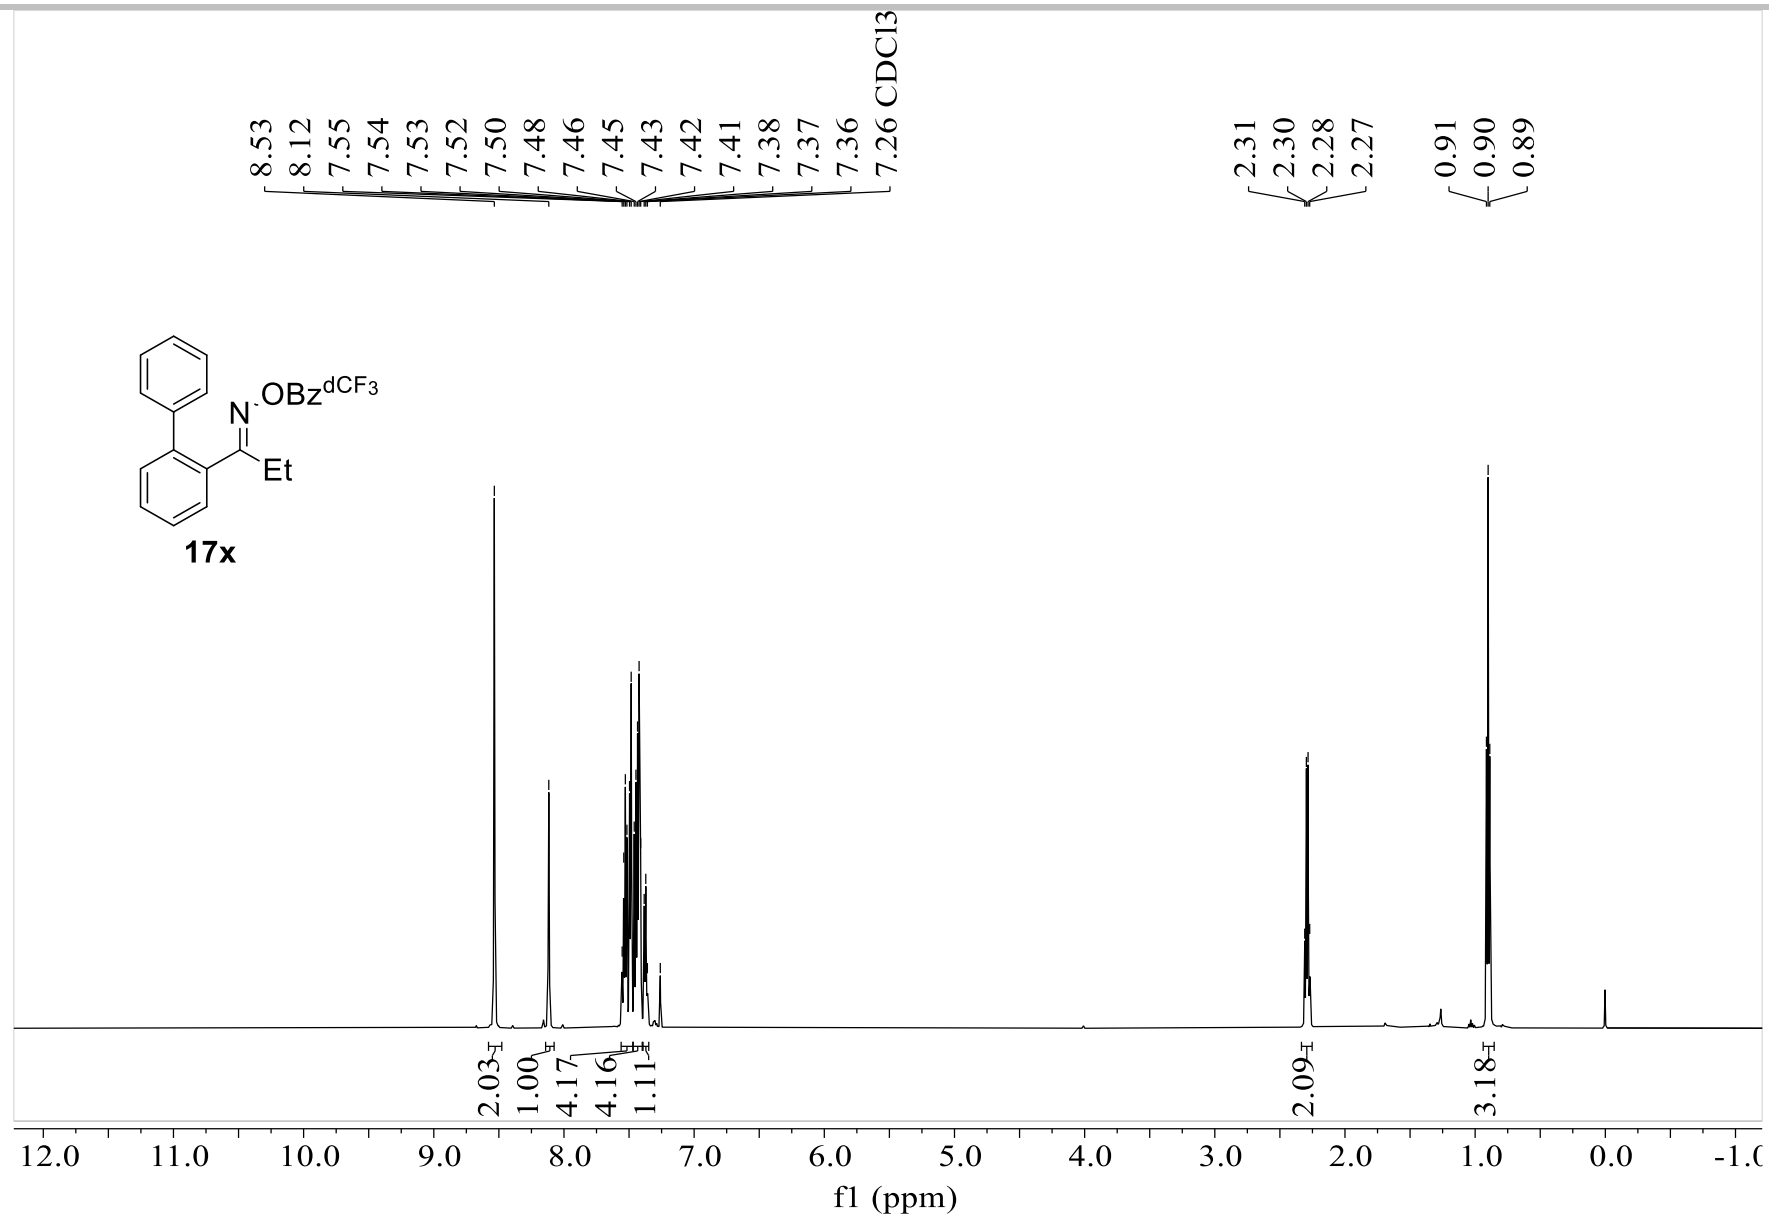

# SUPPORTING INFORMATION

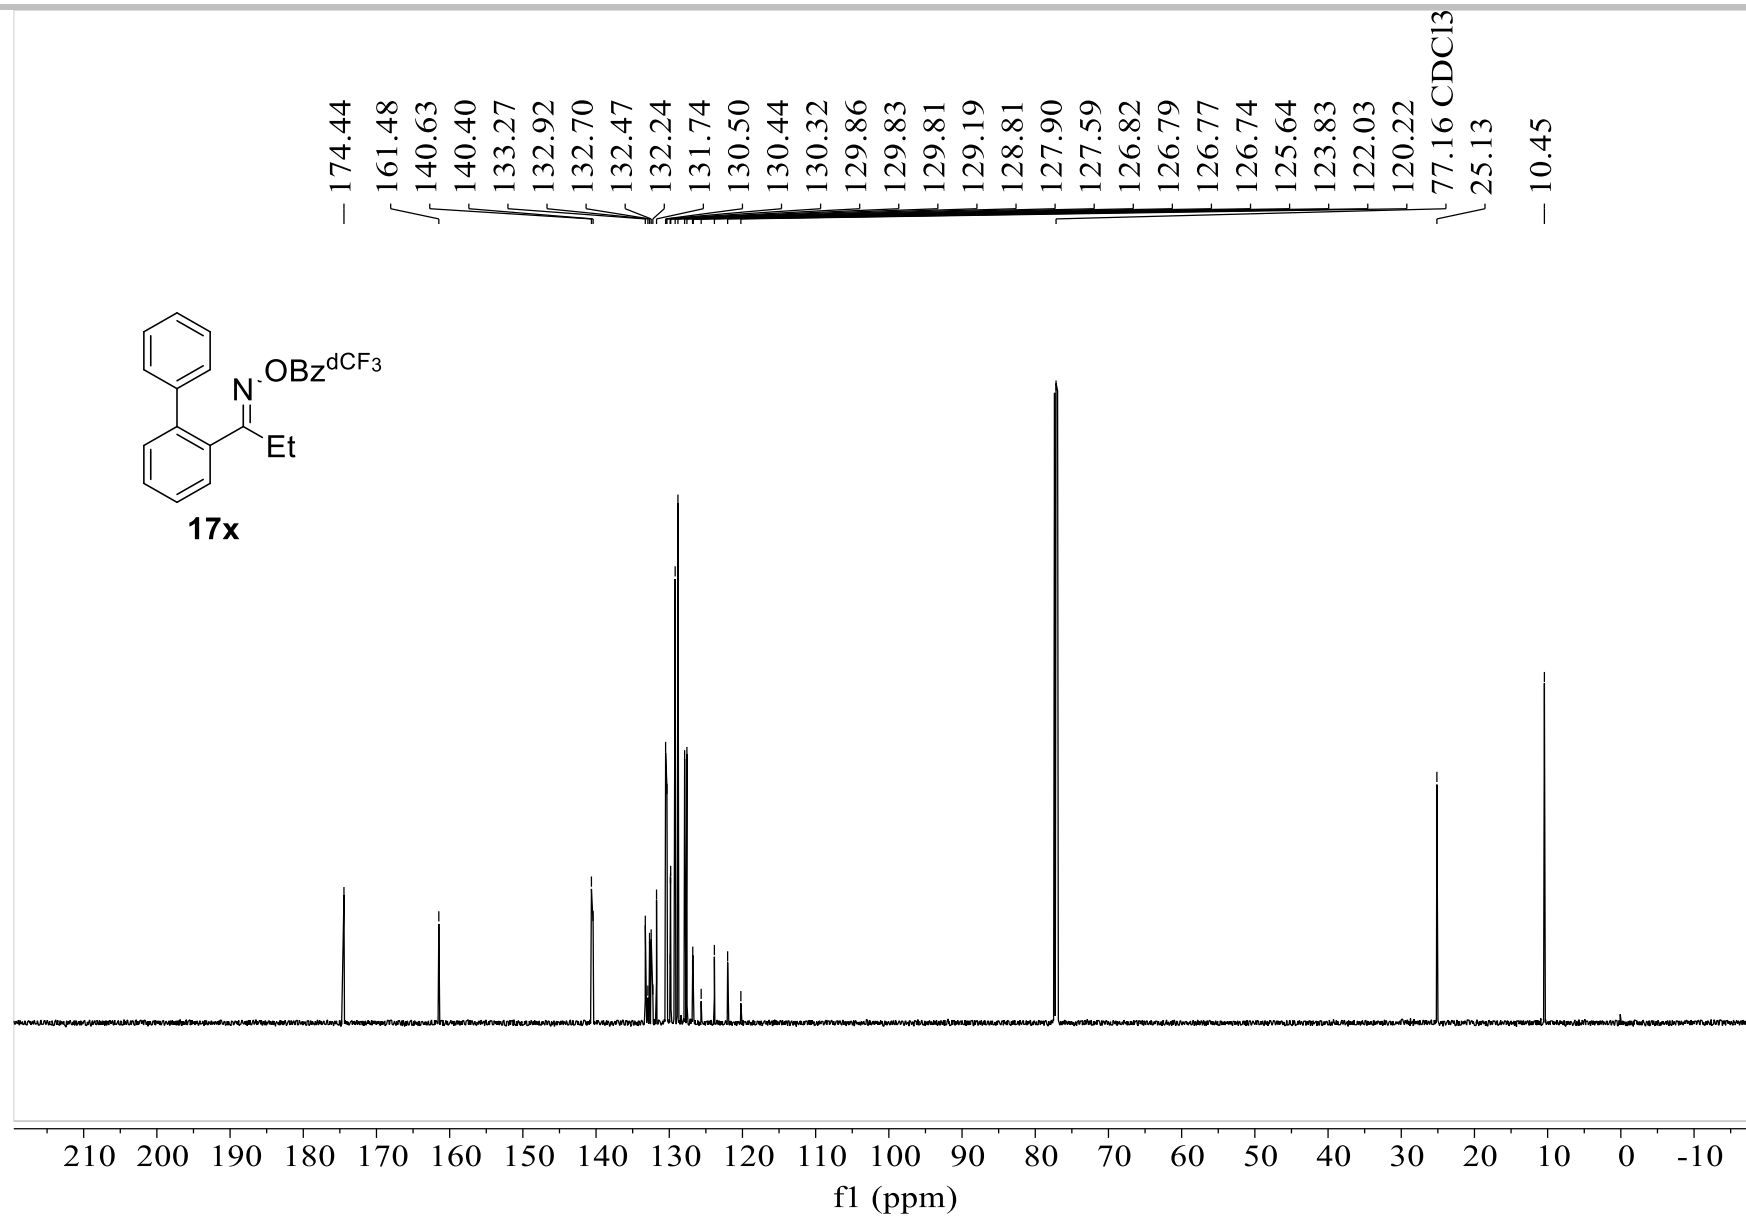

SUPPORTING INFORMATION

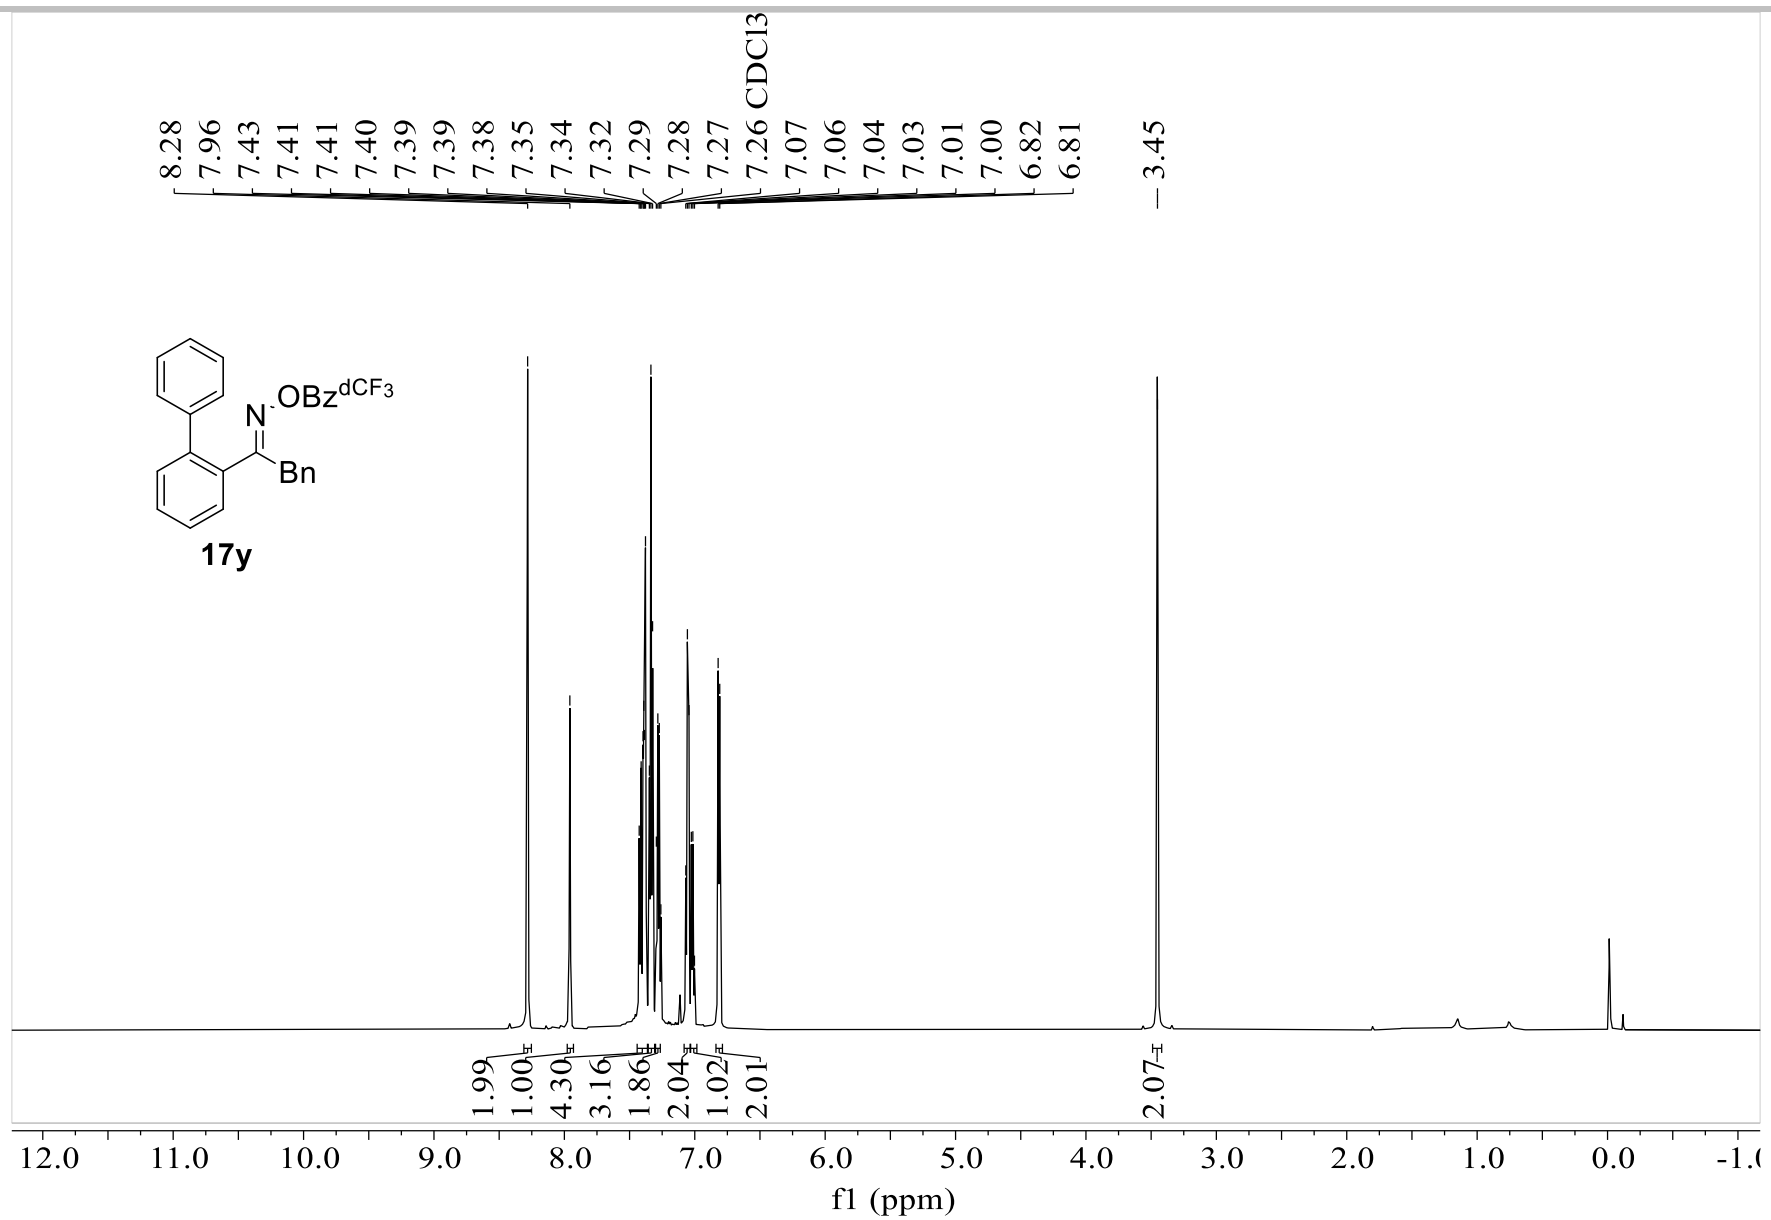



SUPPORTING INFORMATION

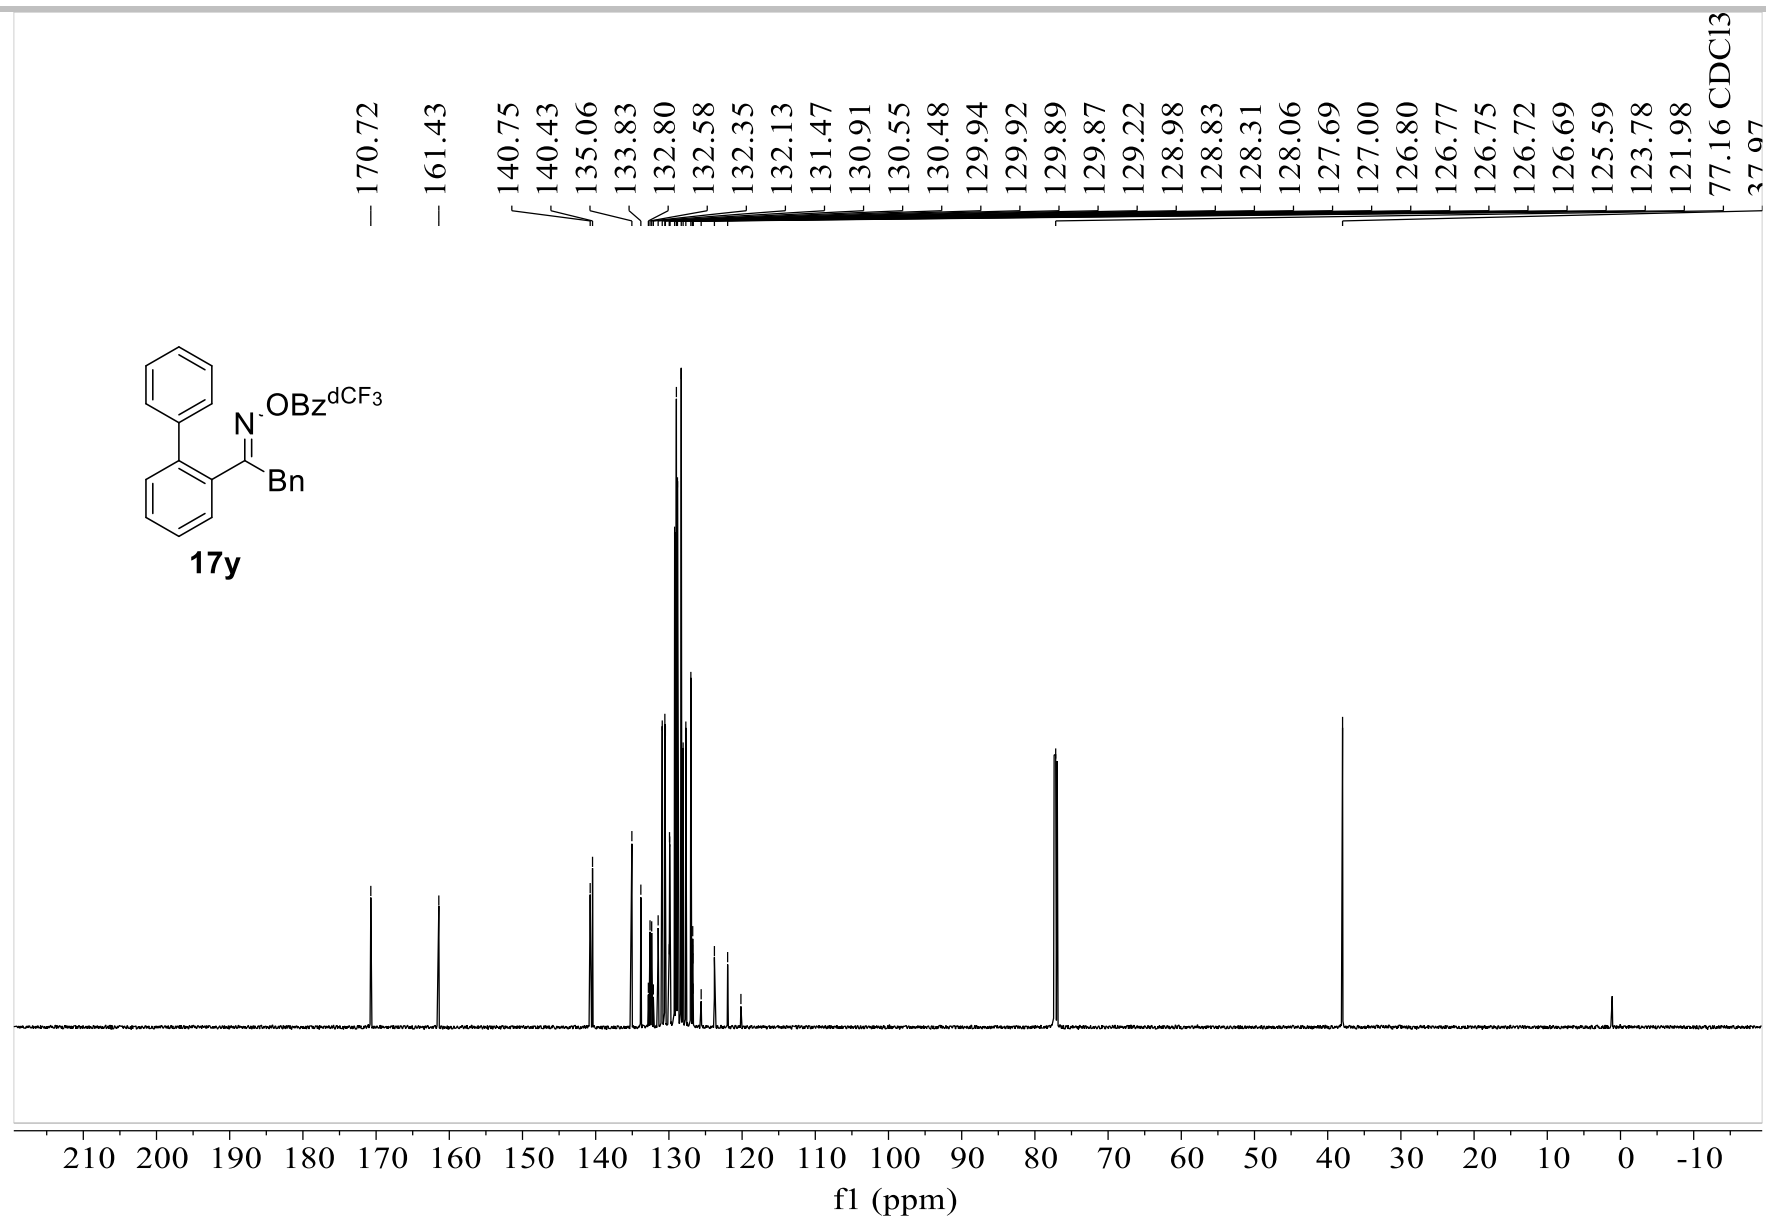

SUPPORTING INFORMATION

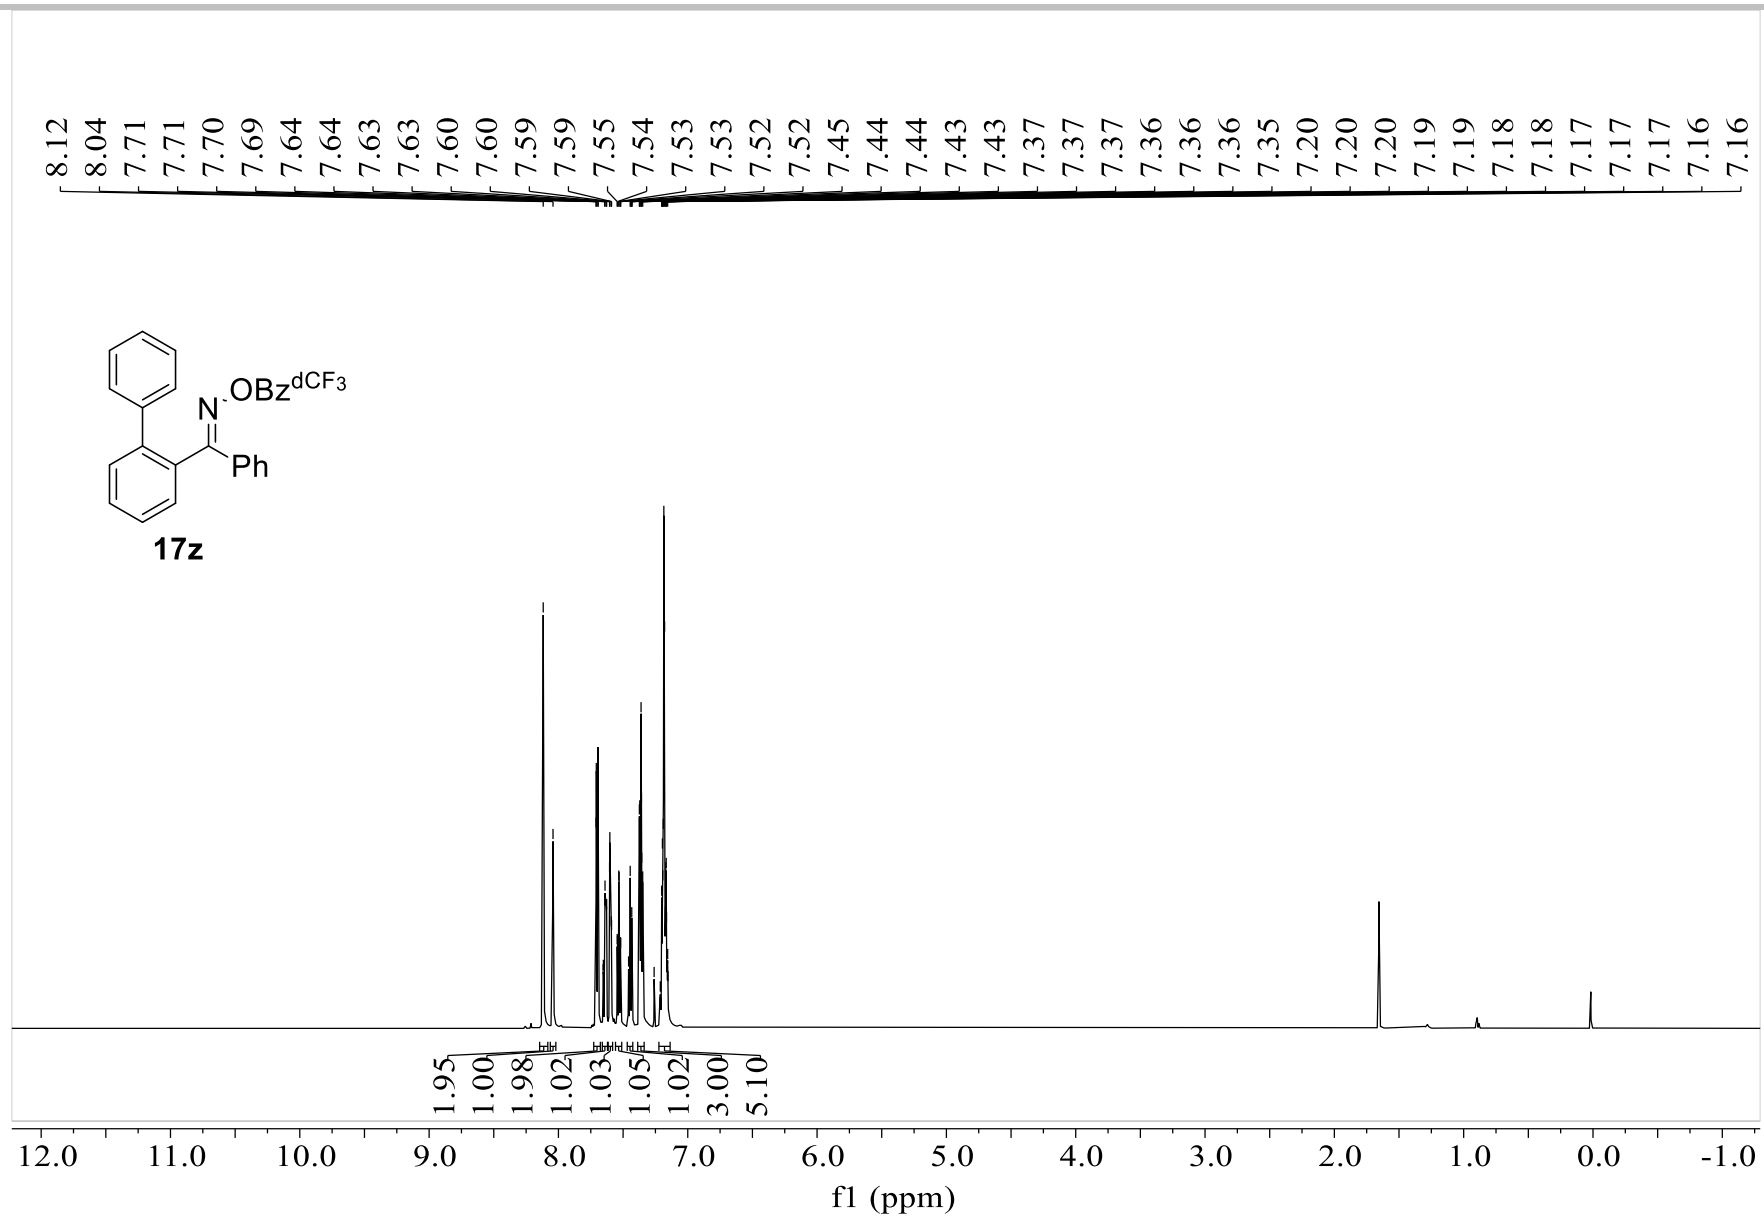

SUPPORTING INFORMATION

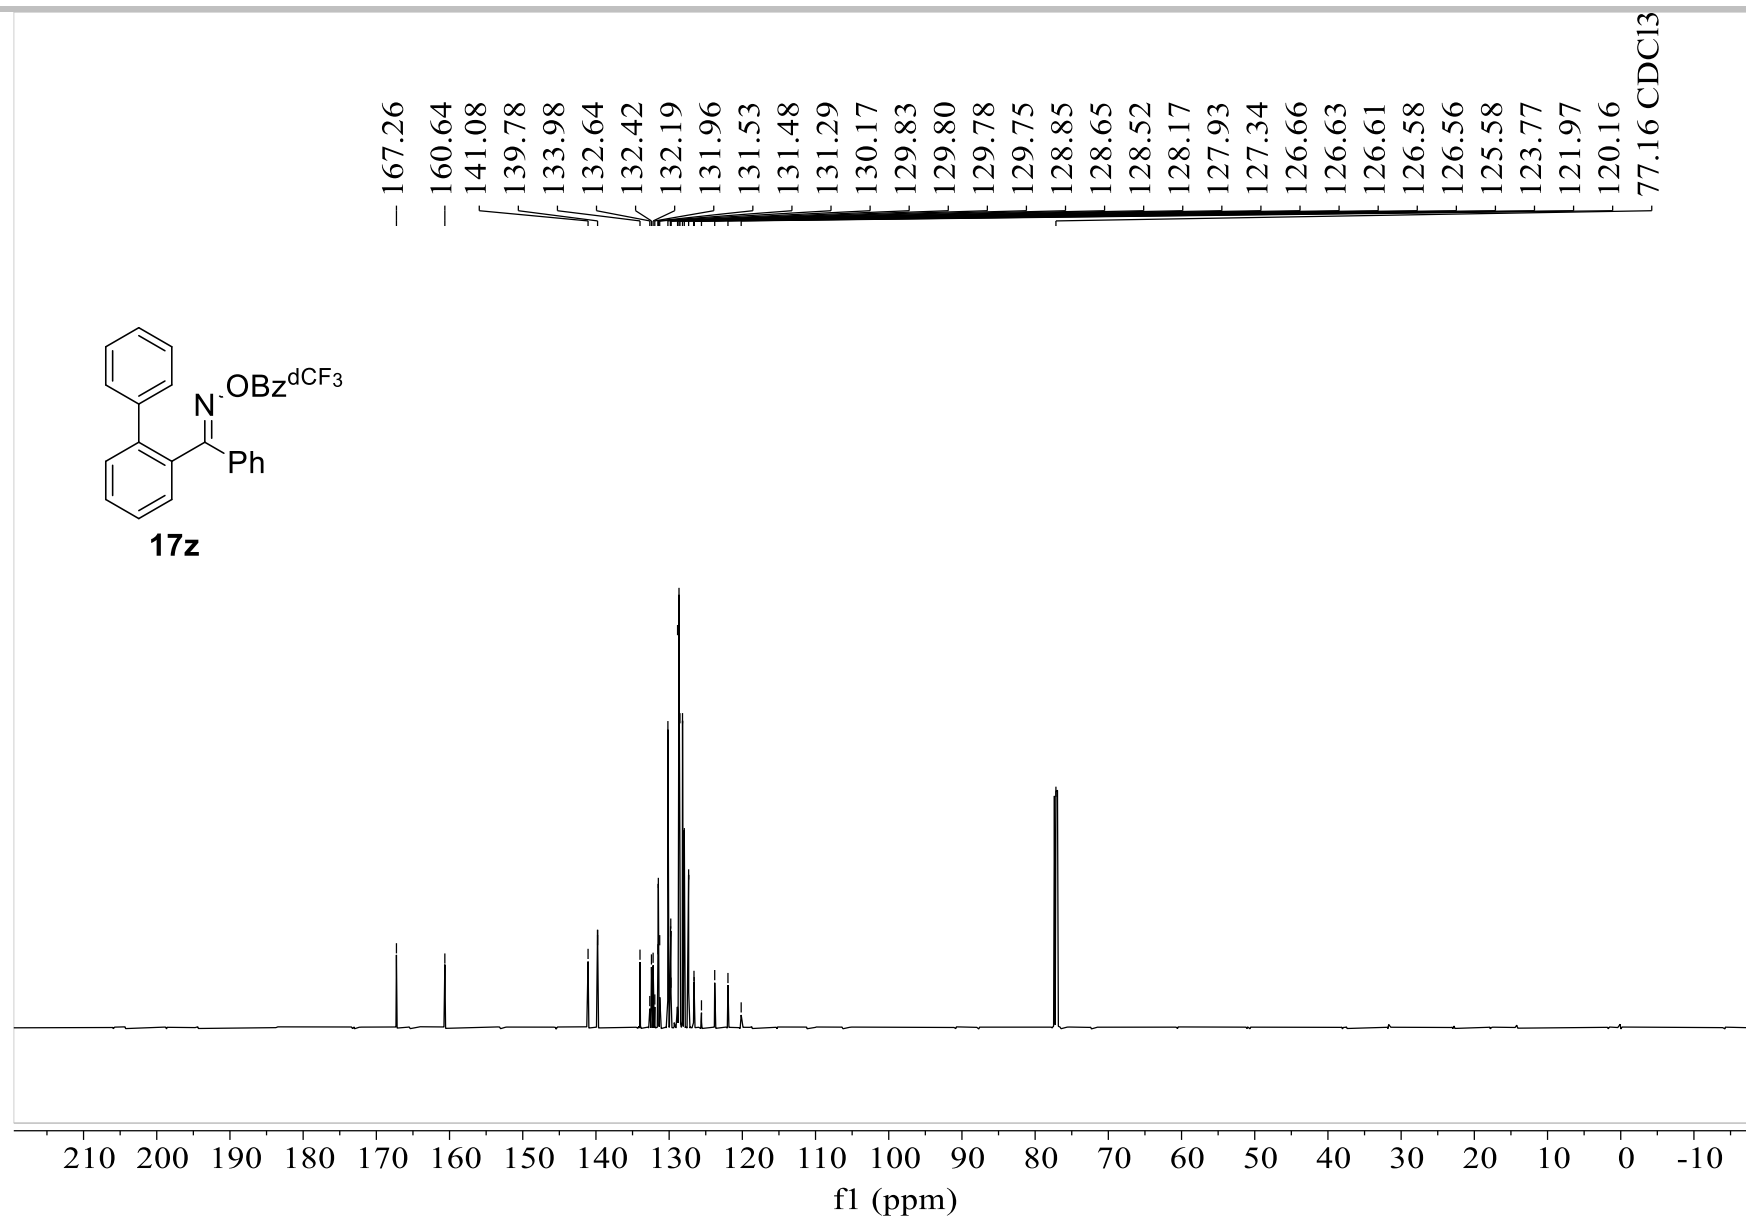

SUPPORTING INFORMATION

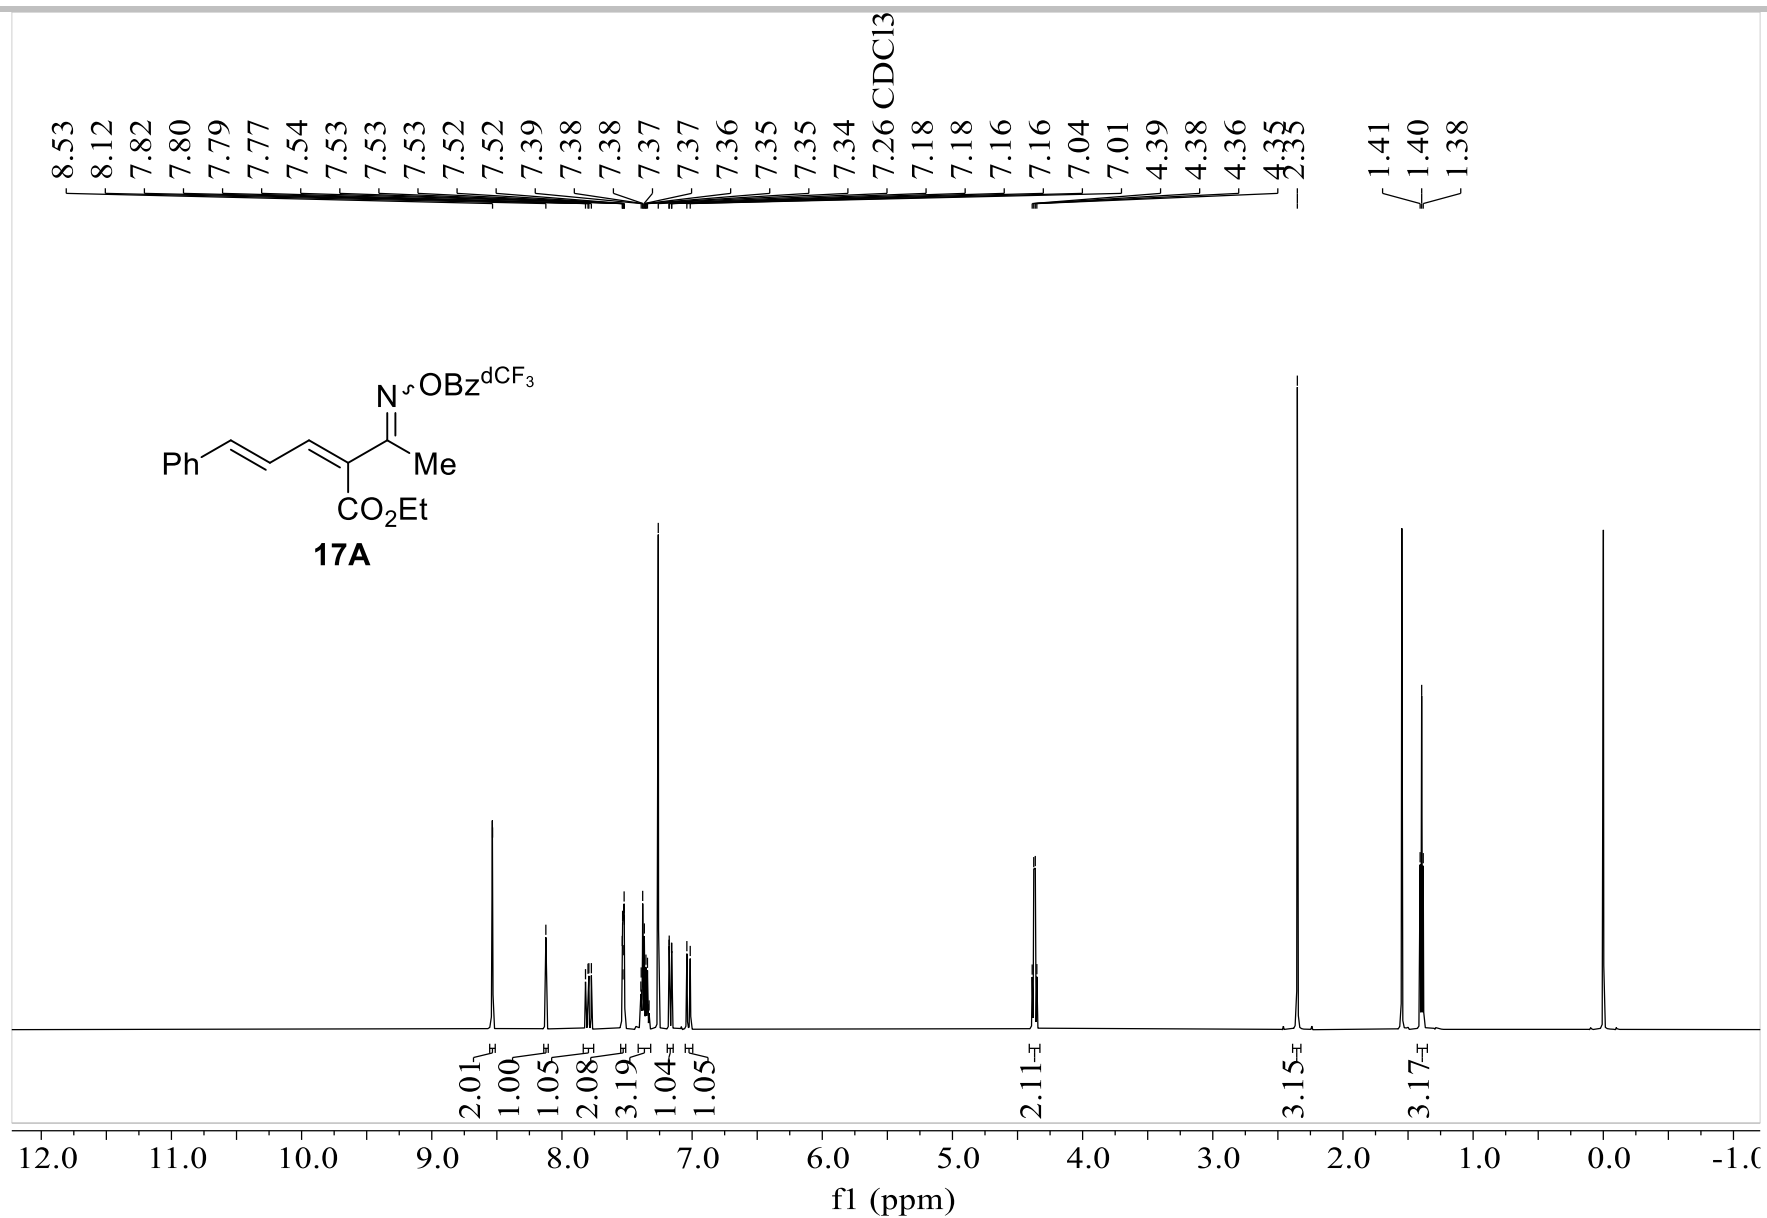

SUPPORTING INFORMATION

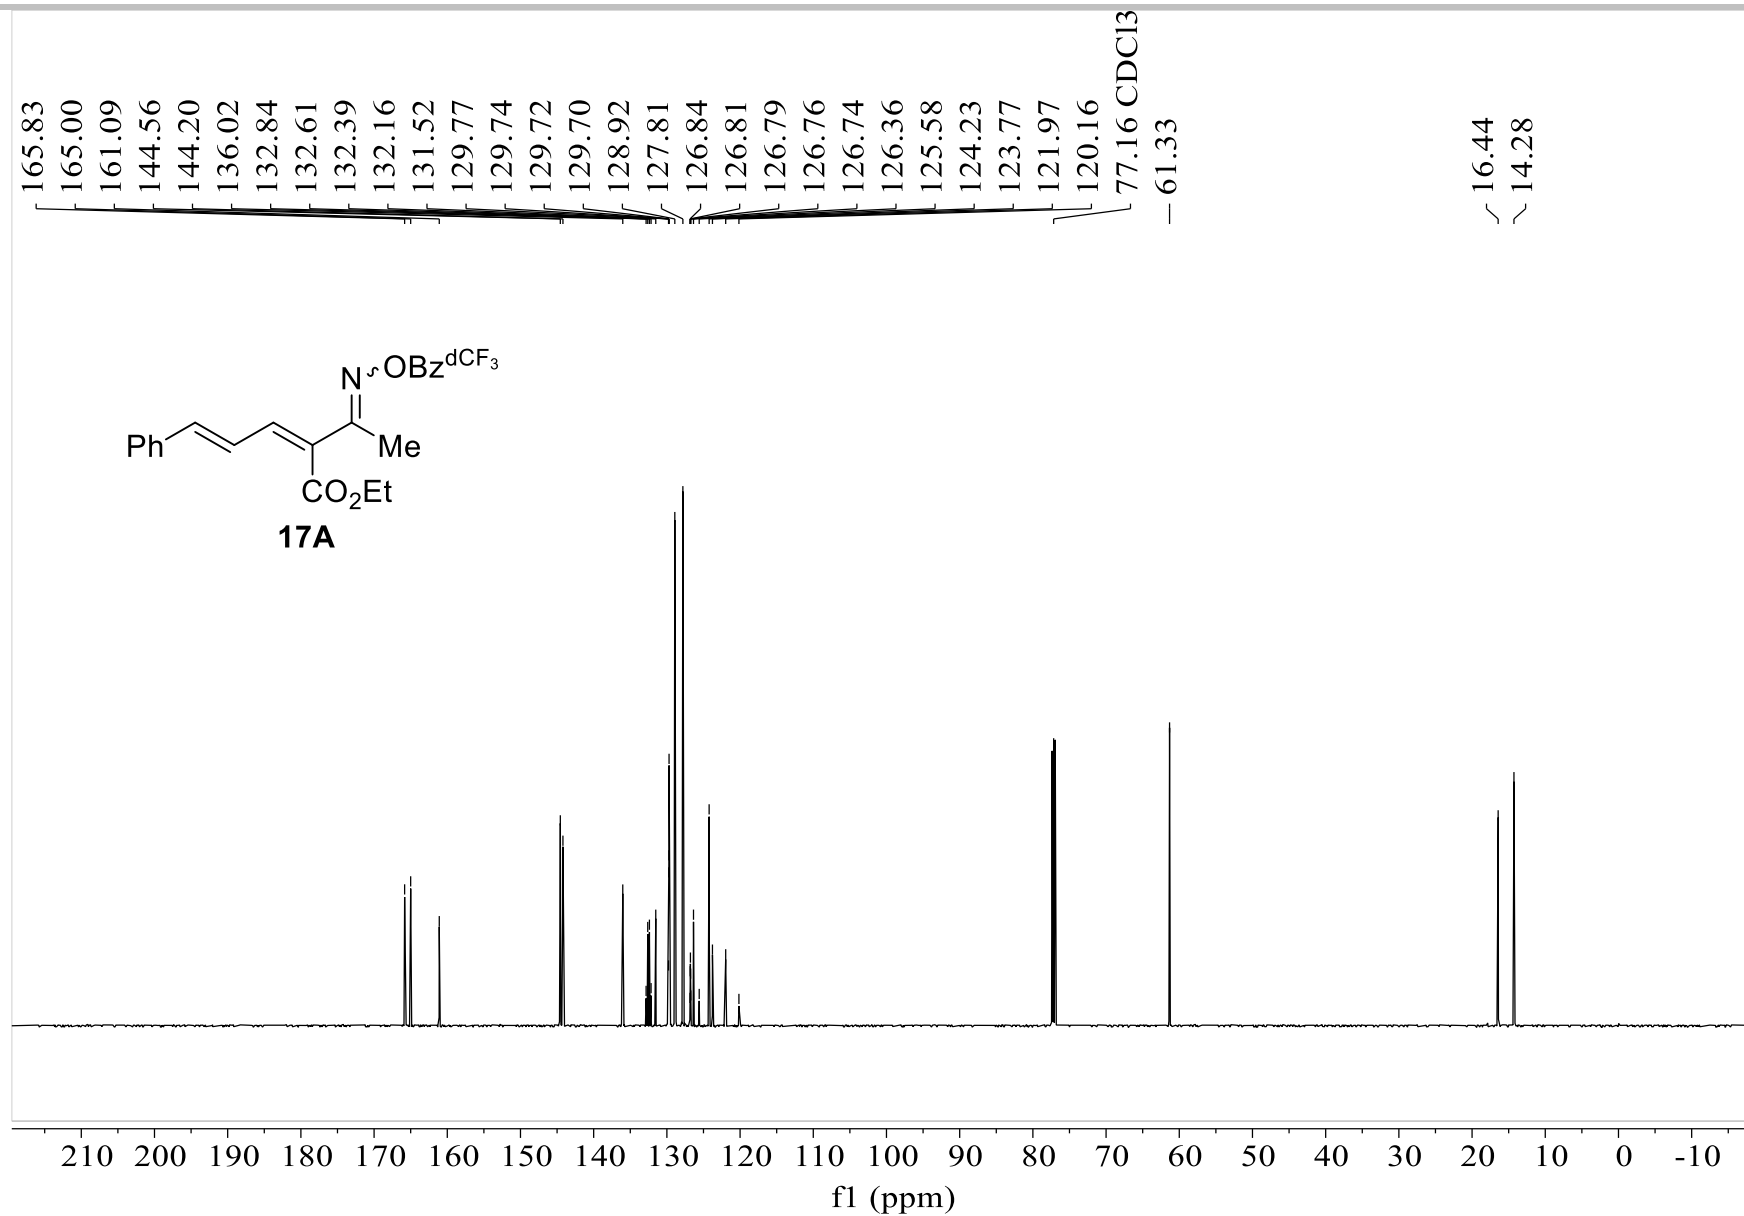

SUPPORTING INFORMATION

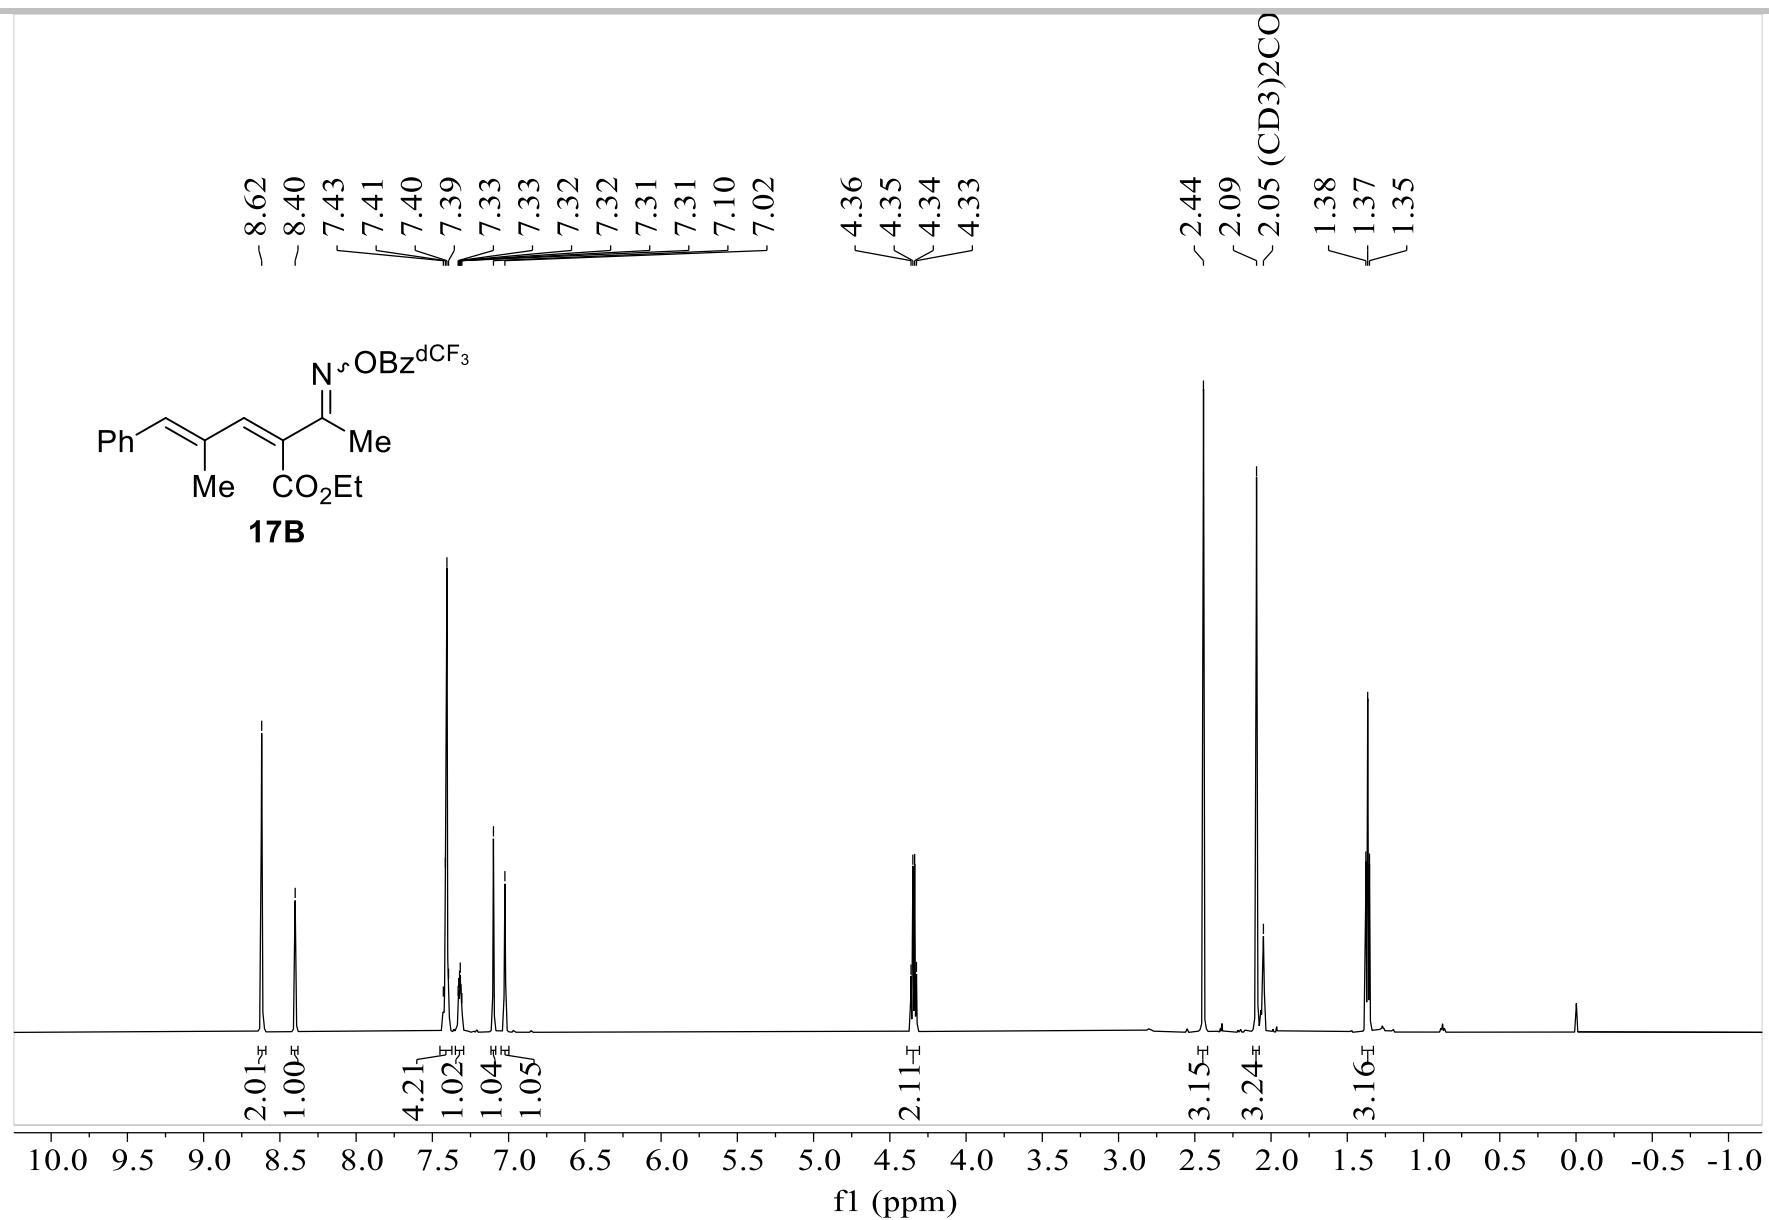

SUPPORTING INFORMATION

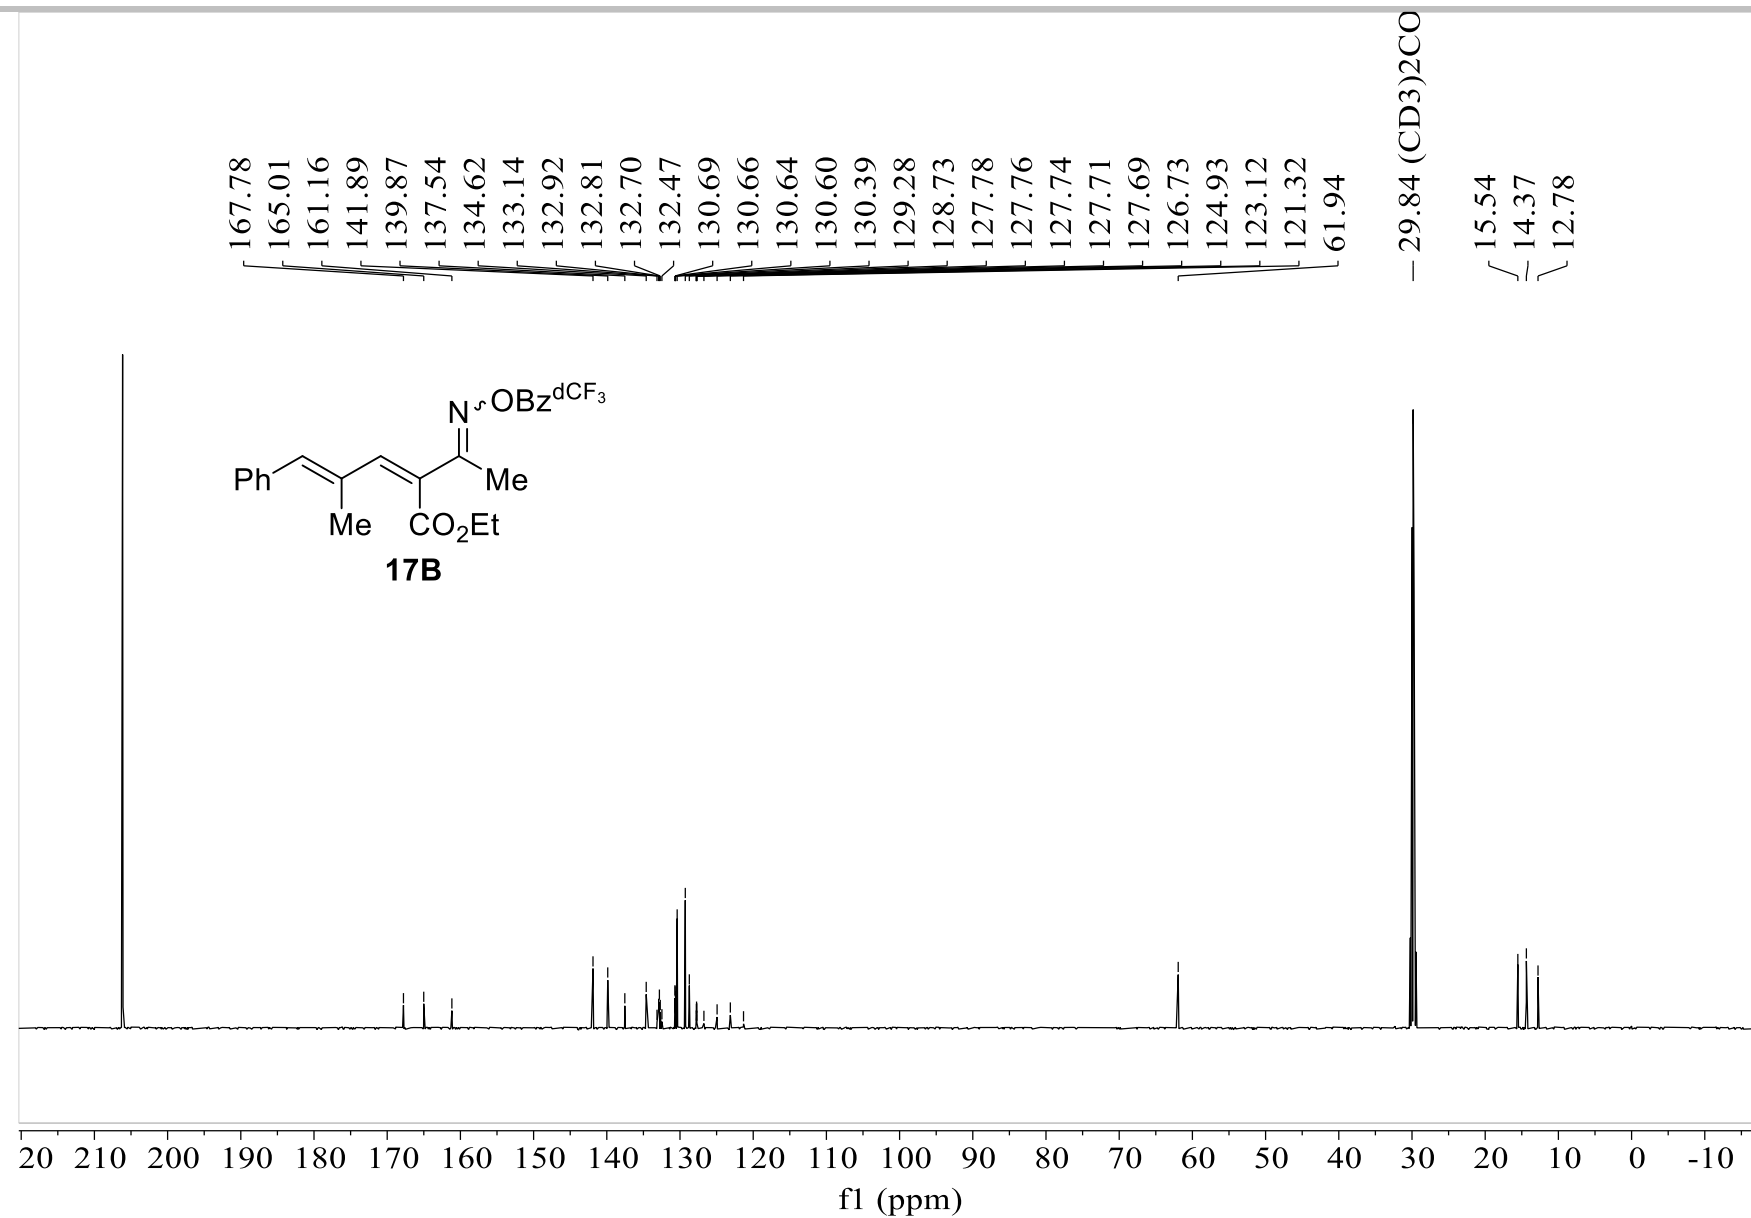

SUPPORTING INFORMATION

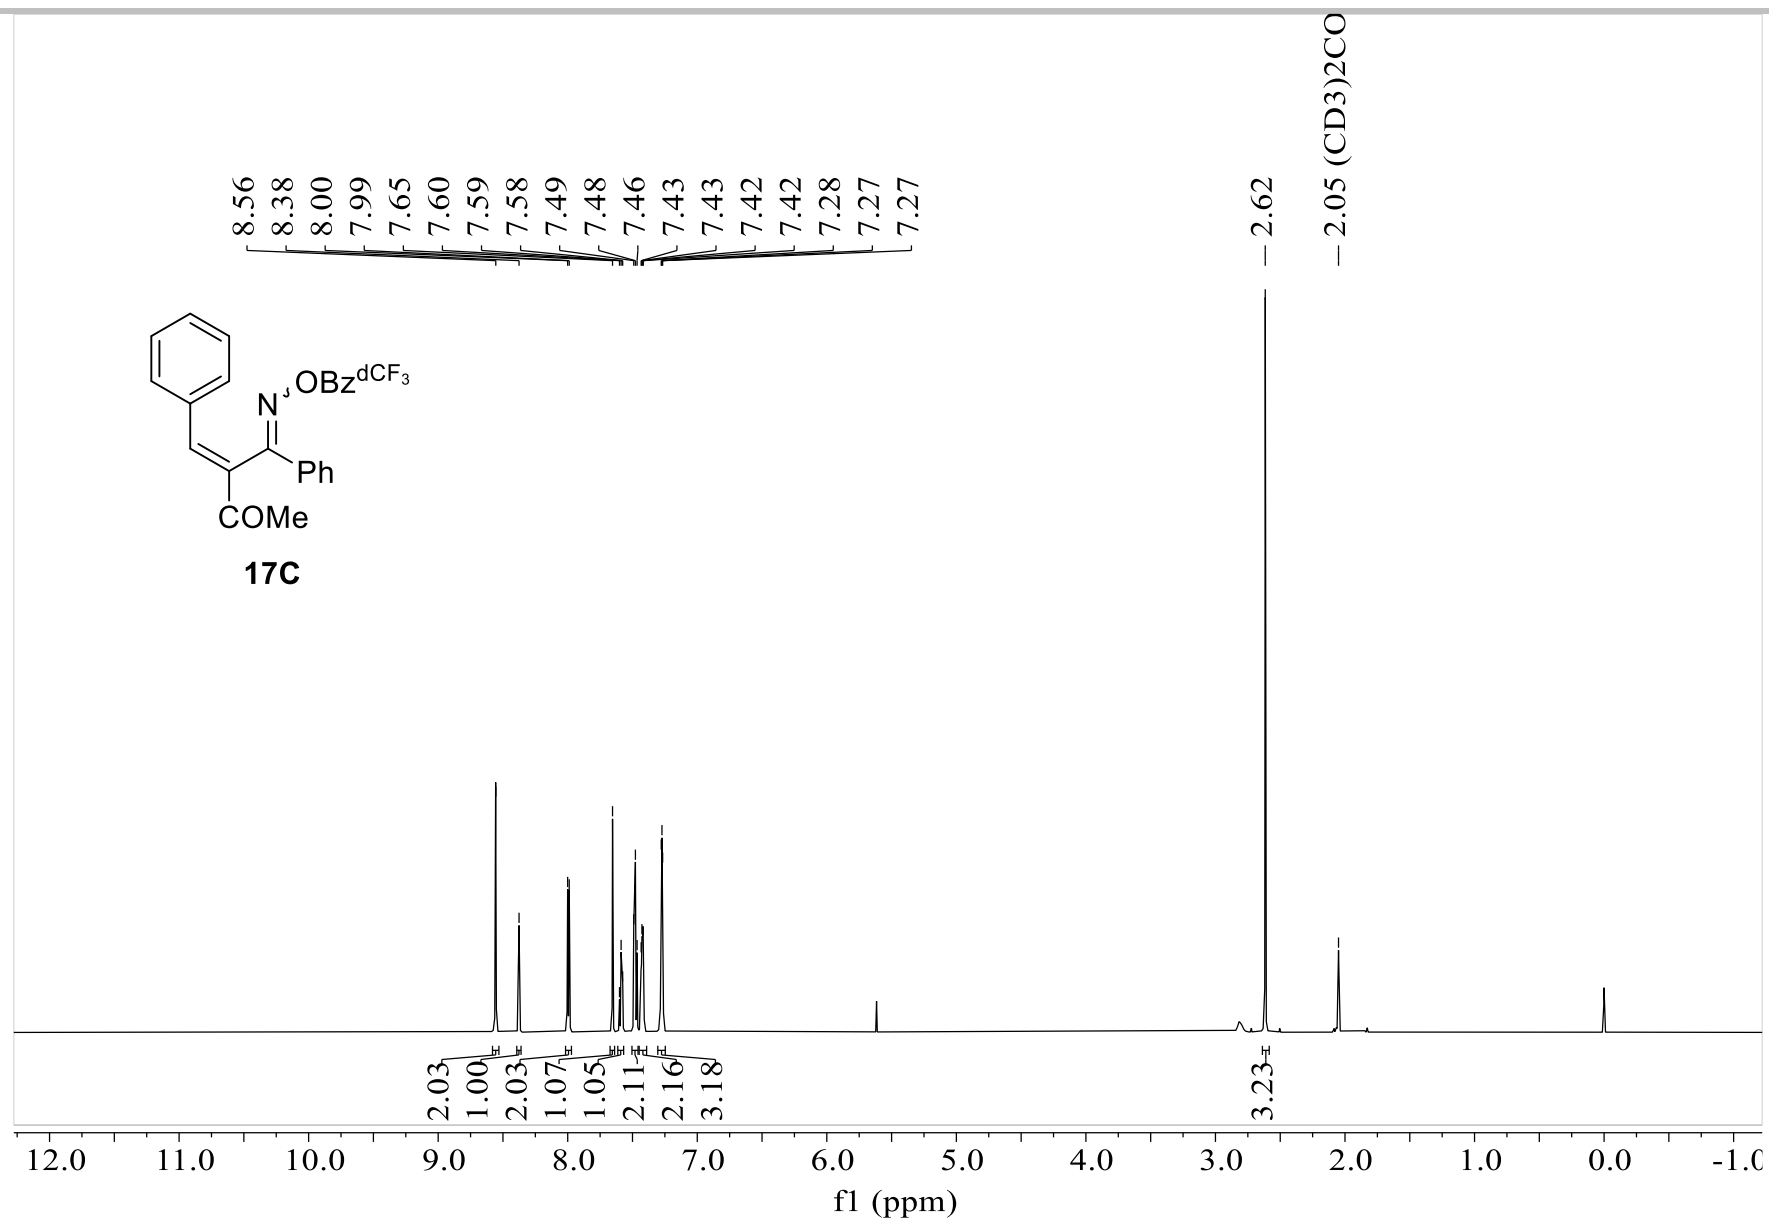



SUPPORTING INFORMATION

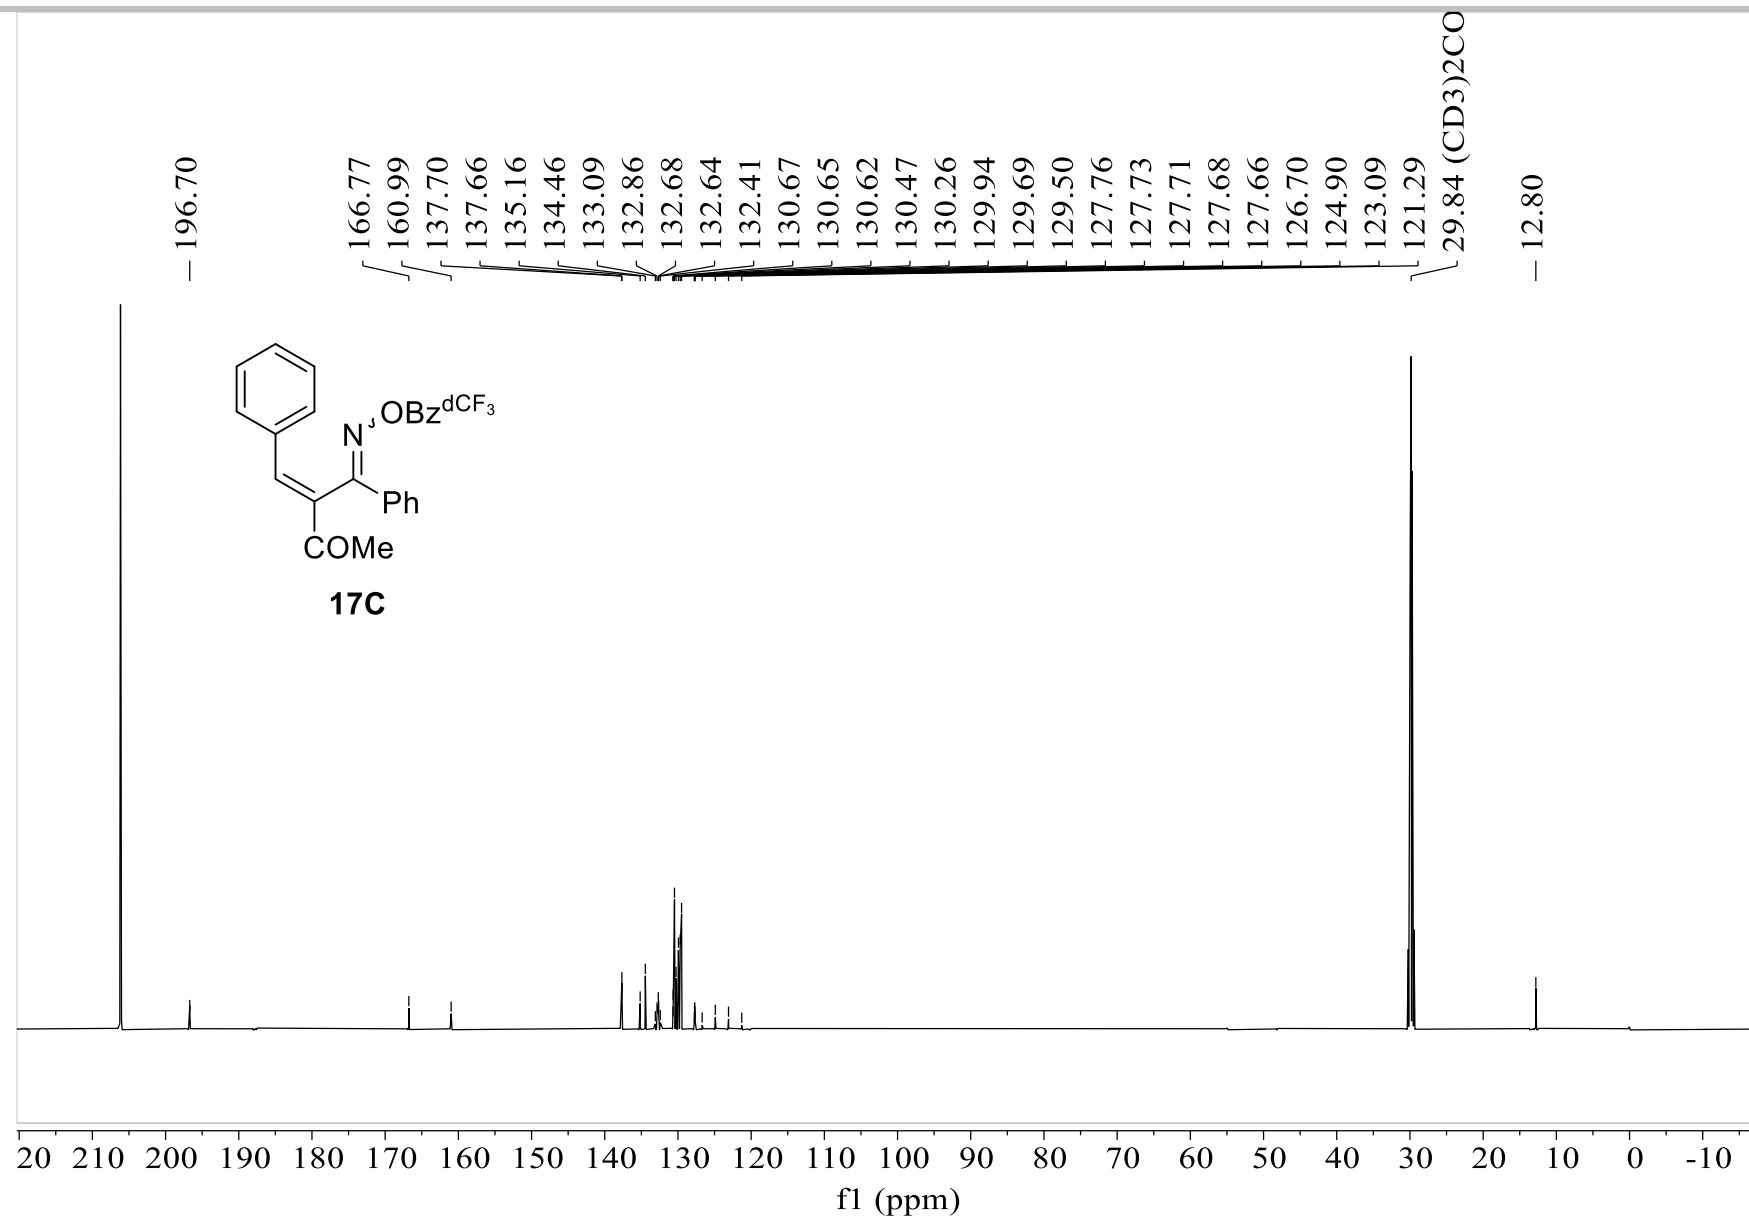

SUPPORTING INFORMATION

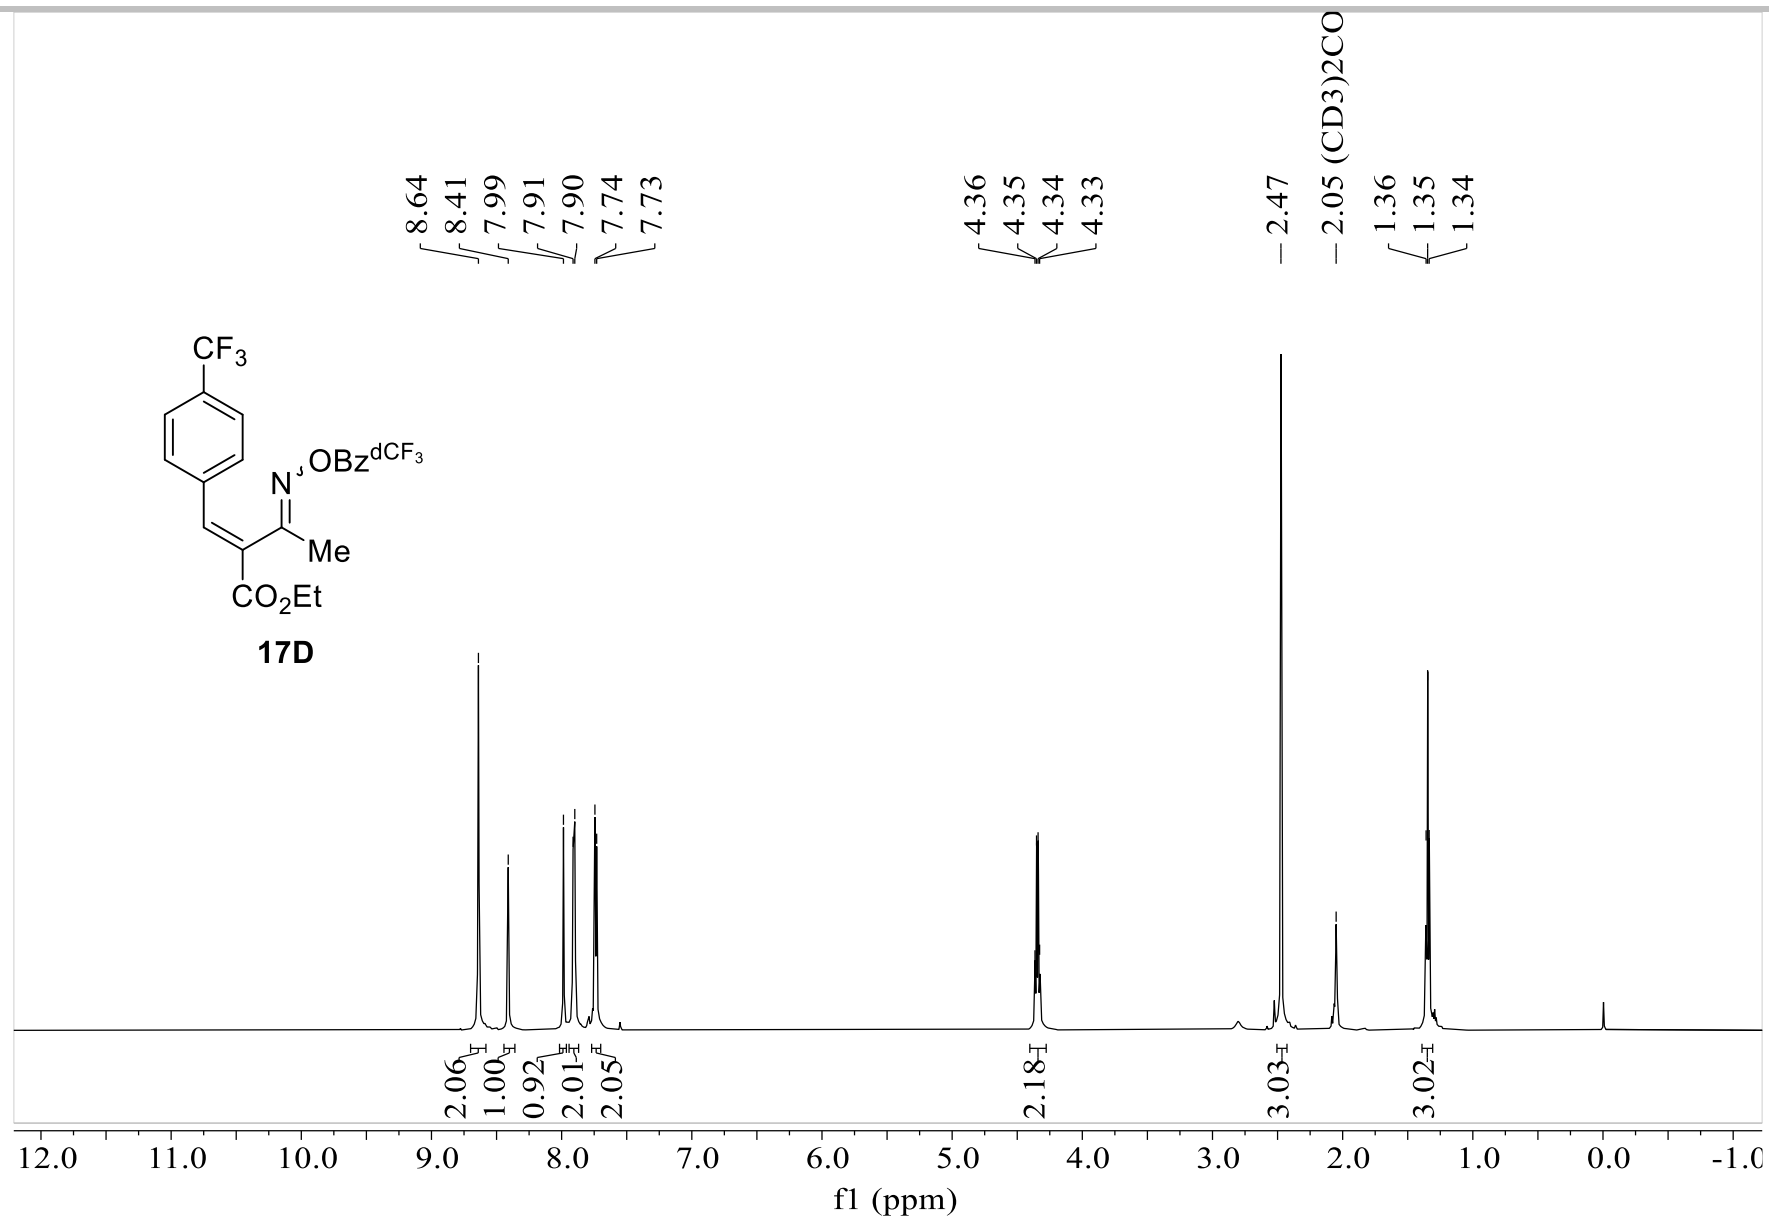

SUPPORTING INFORMATION

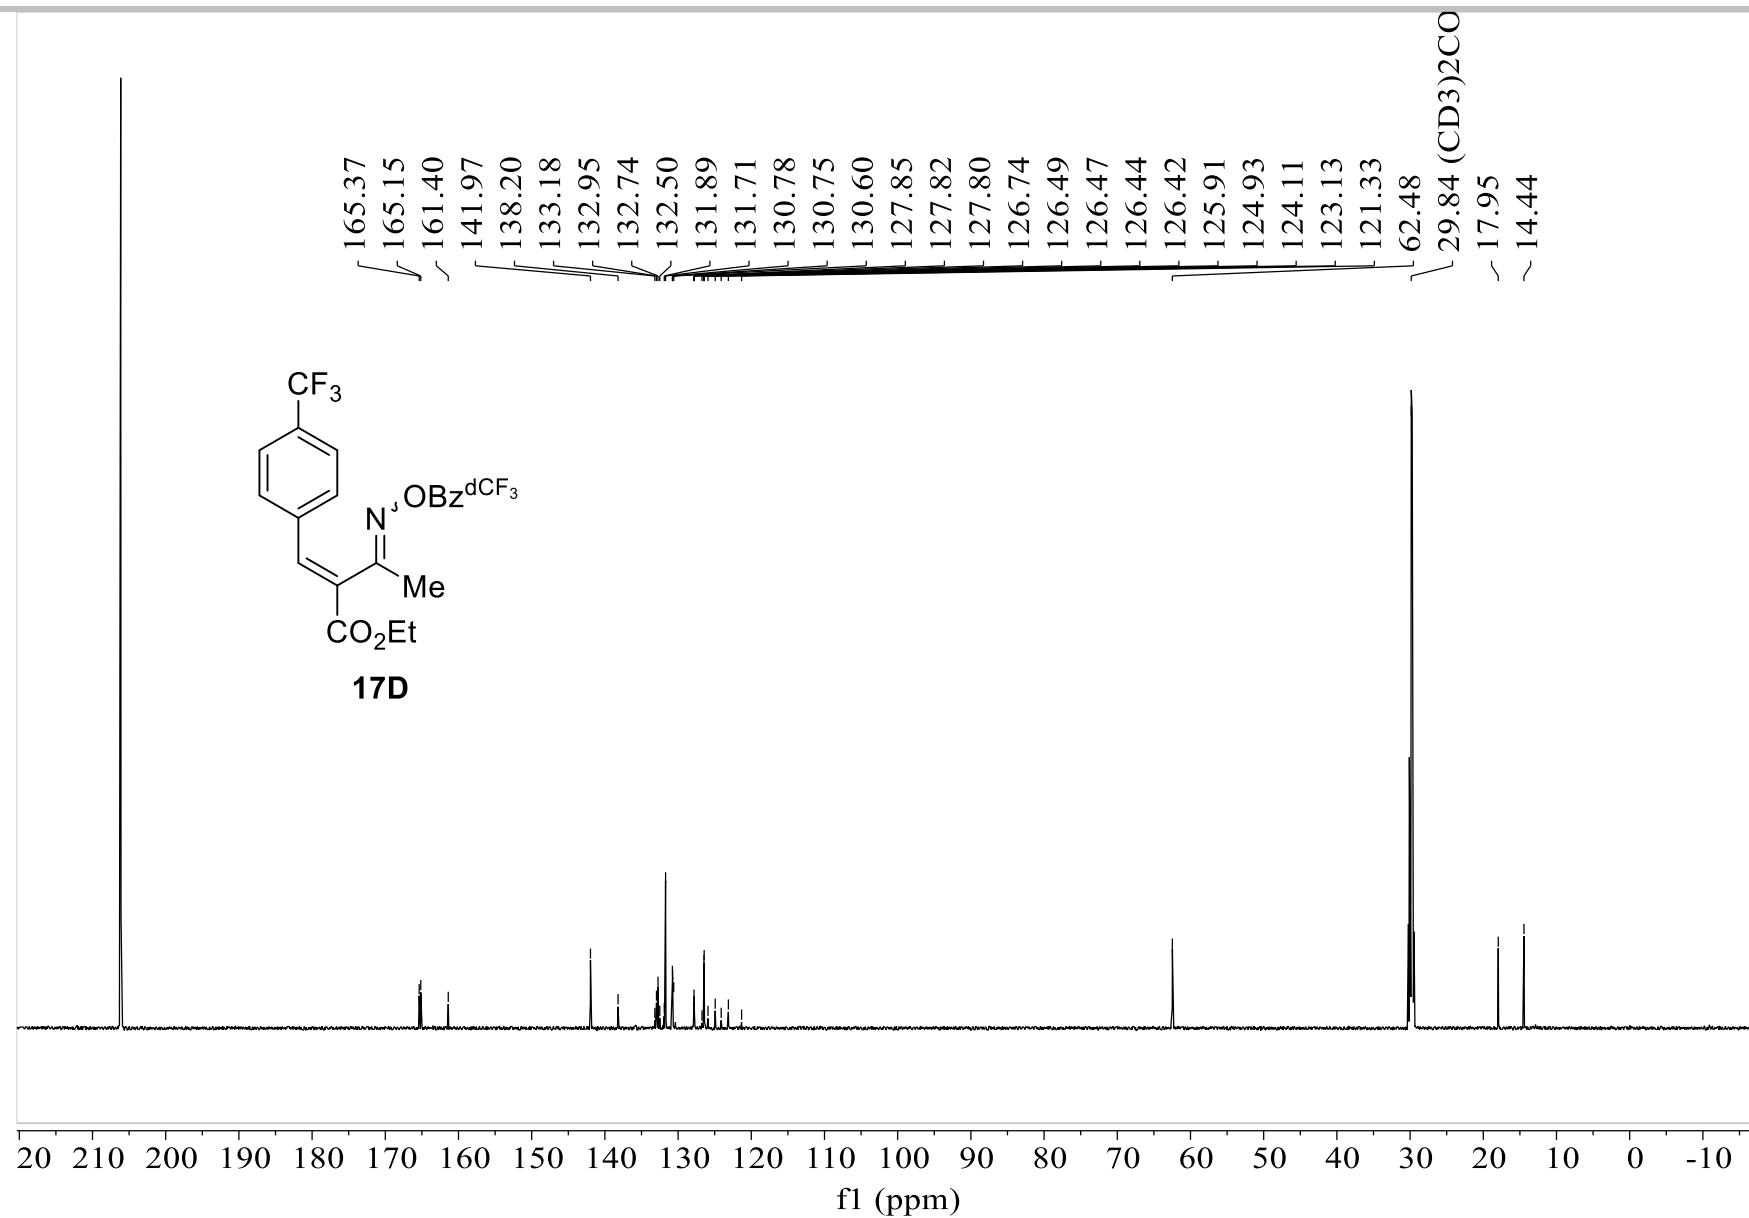

SUPPORTING INFORMATION

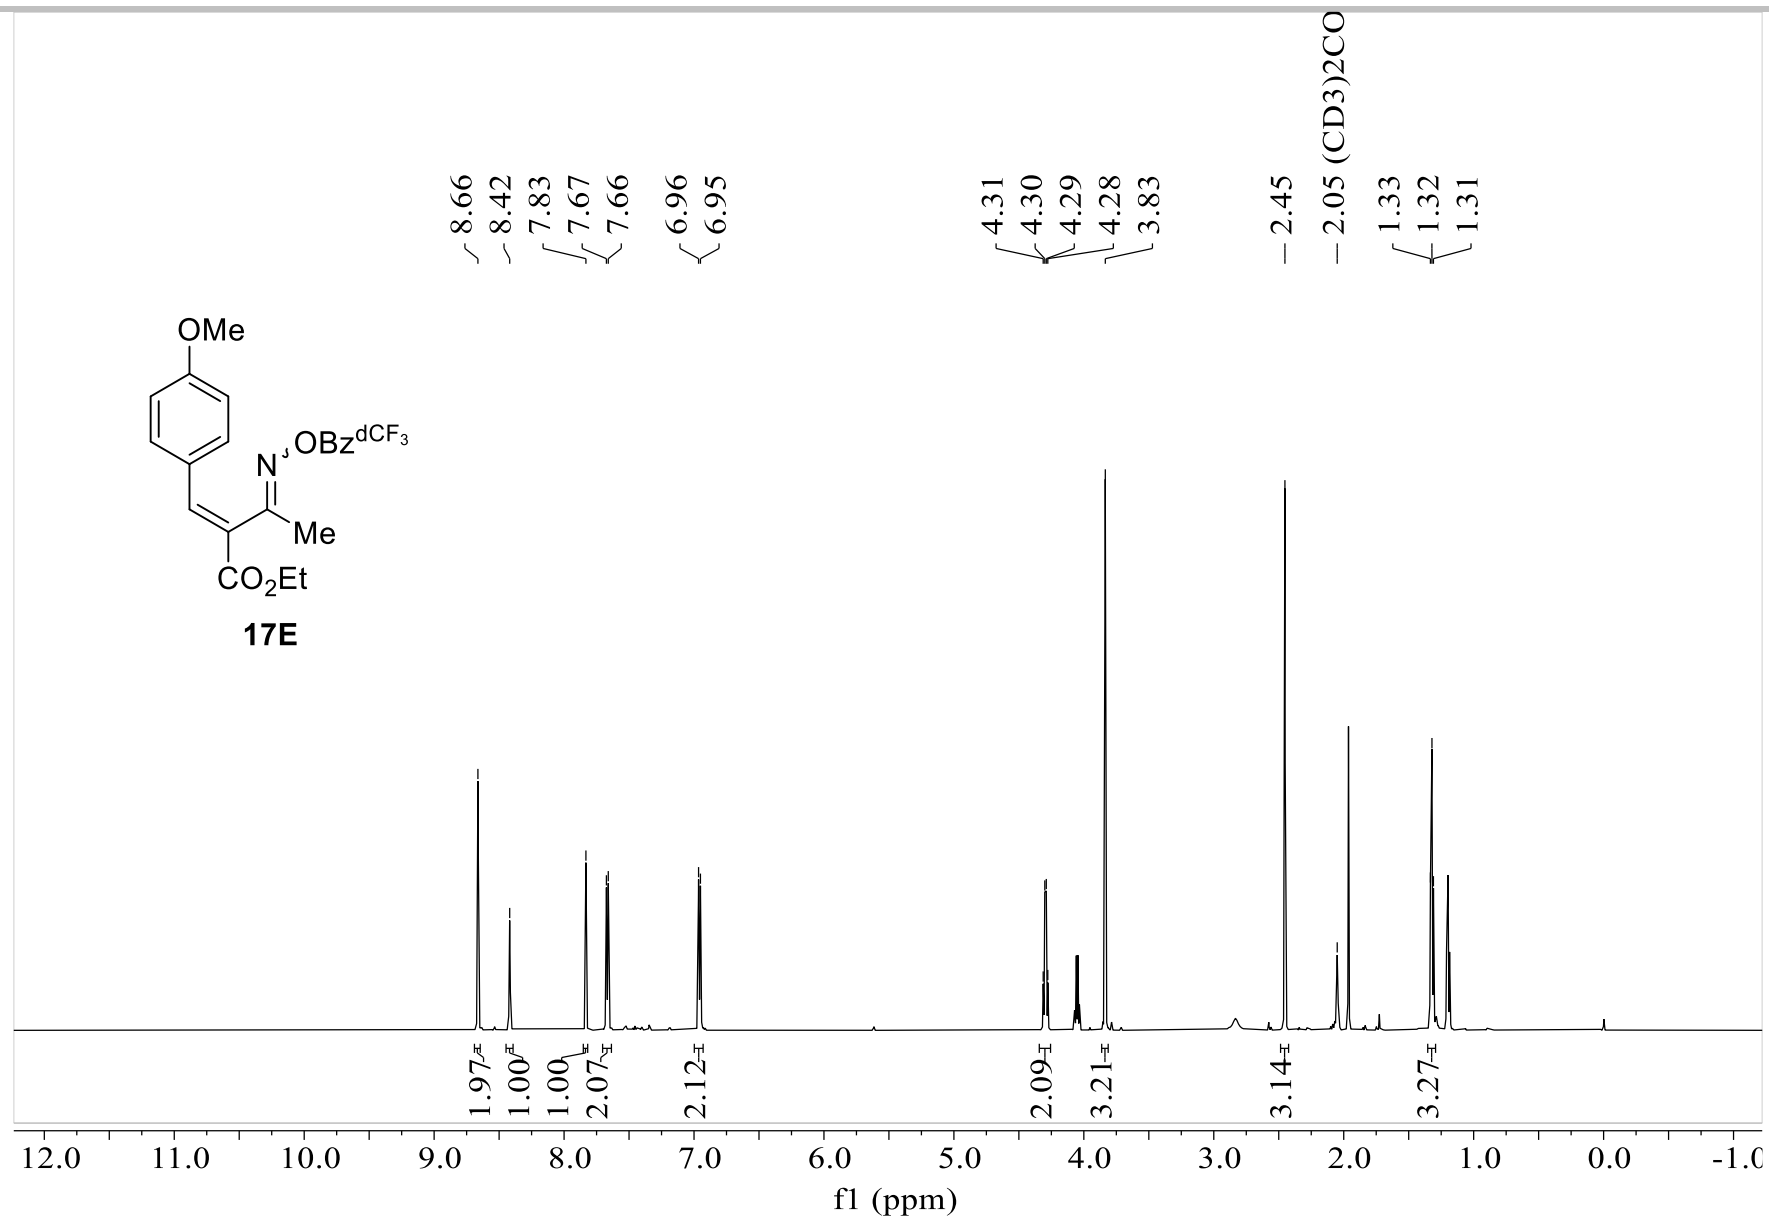

SUPPORTING INFORMATION

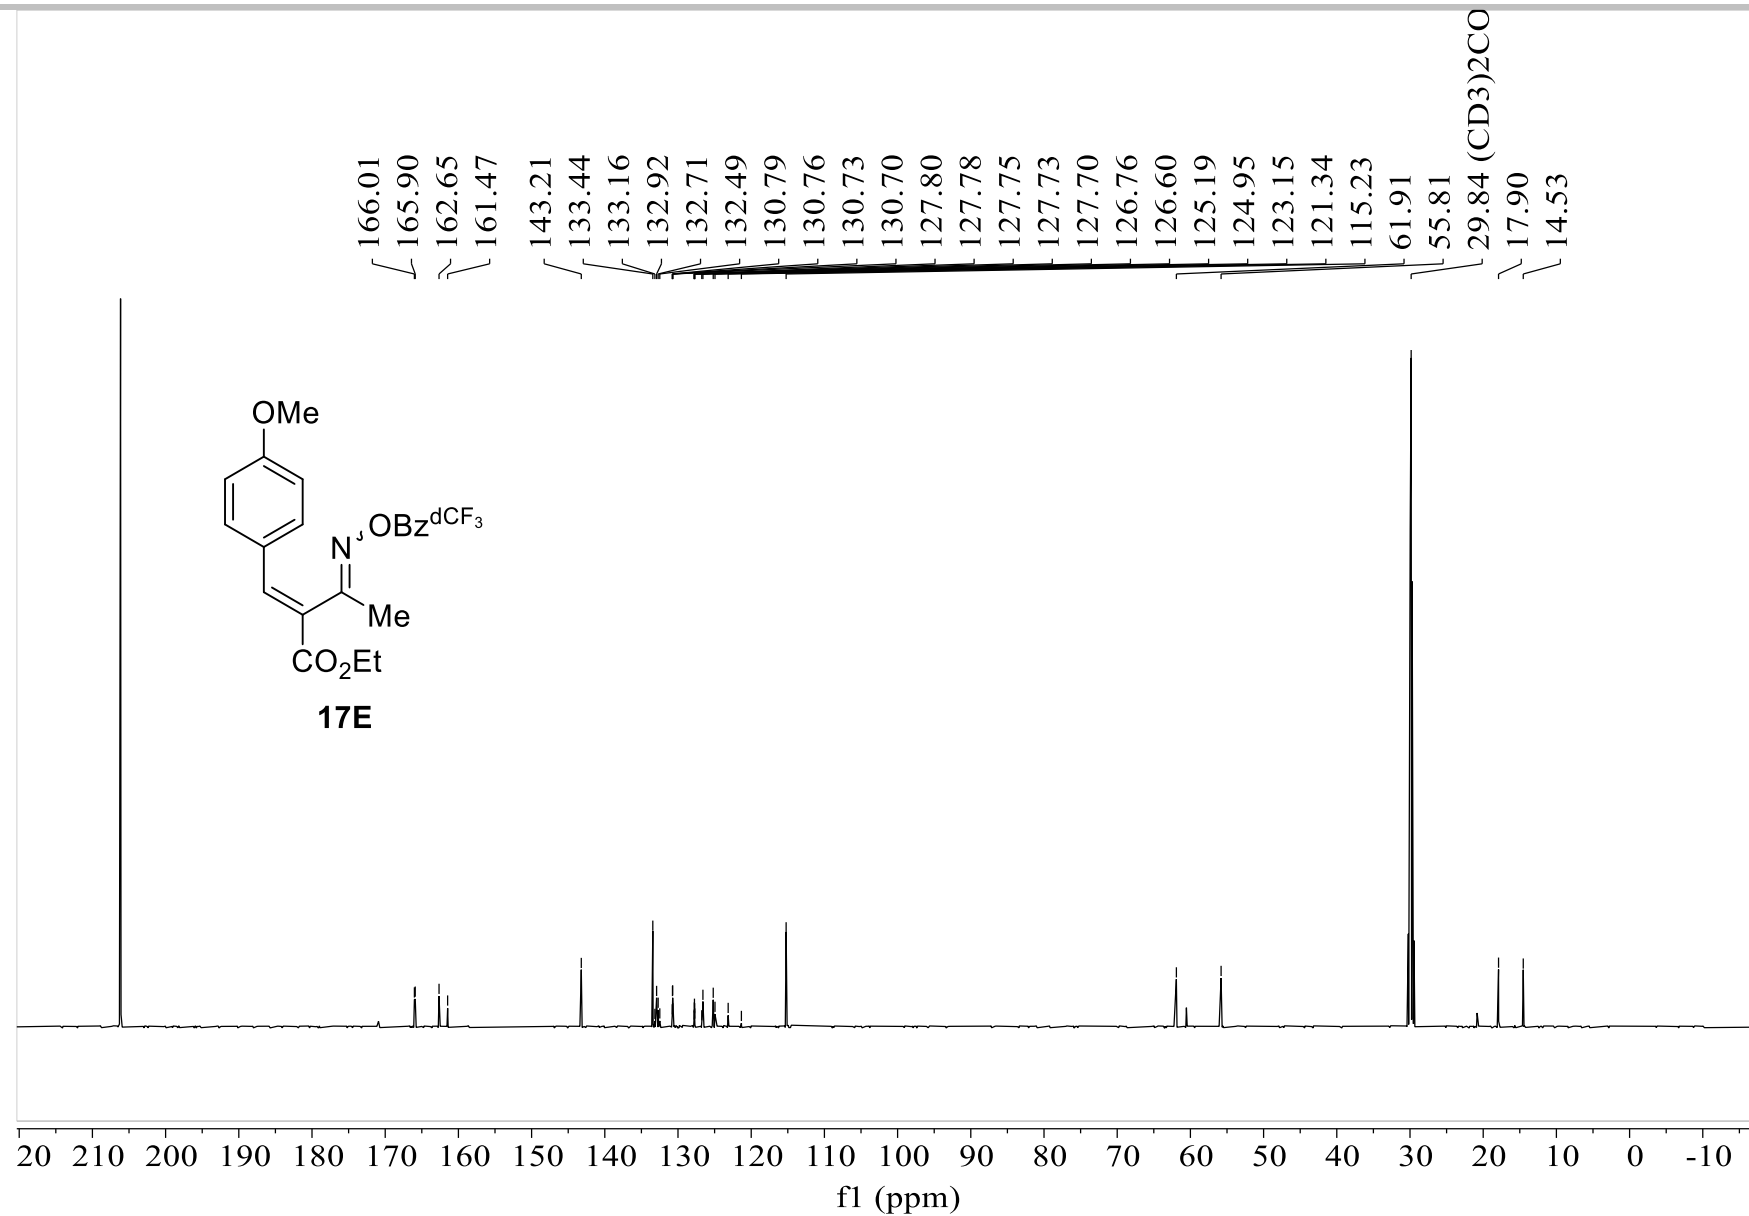

SUPPORTING INFORMATION

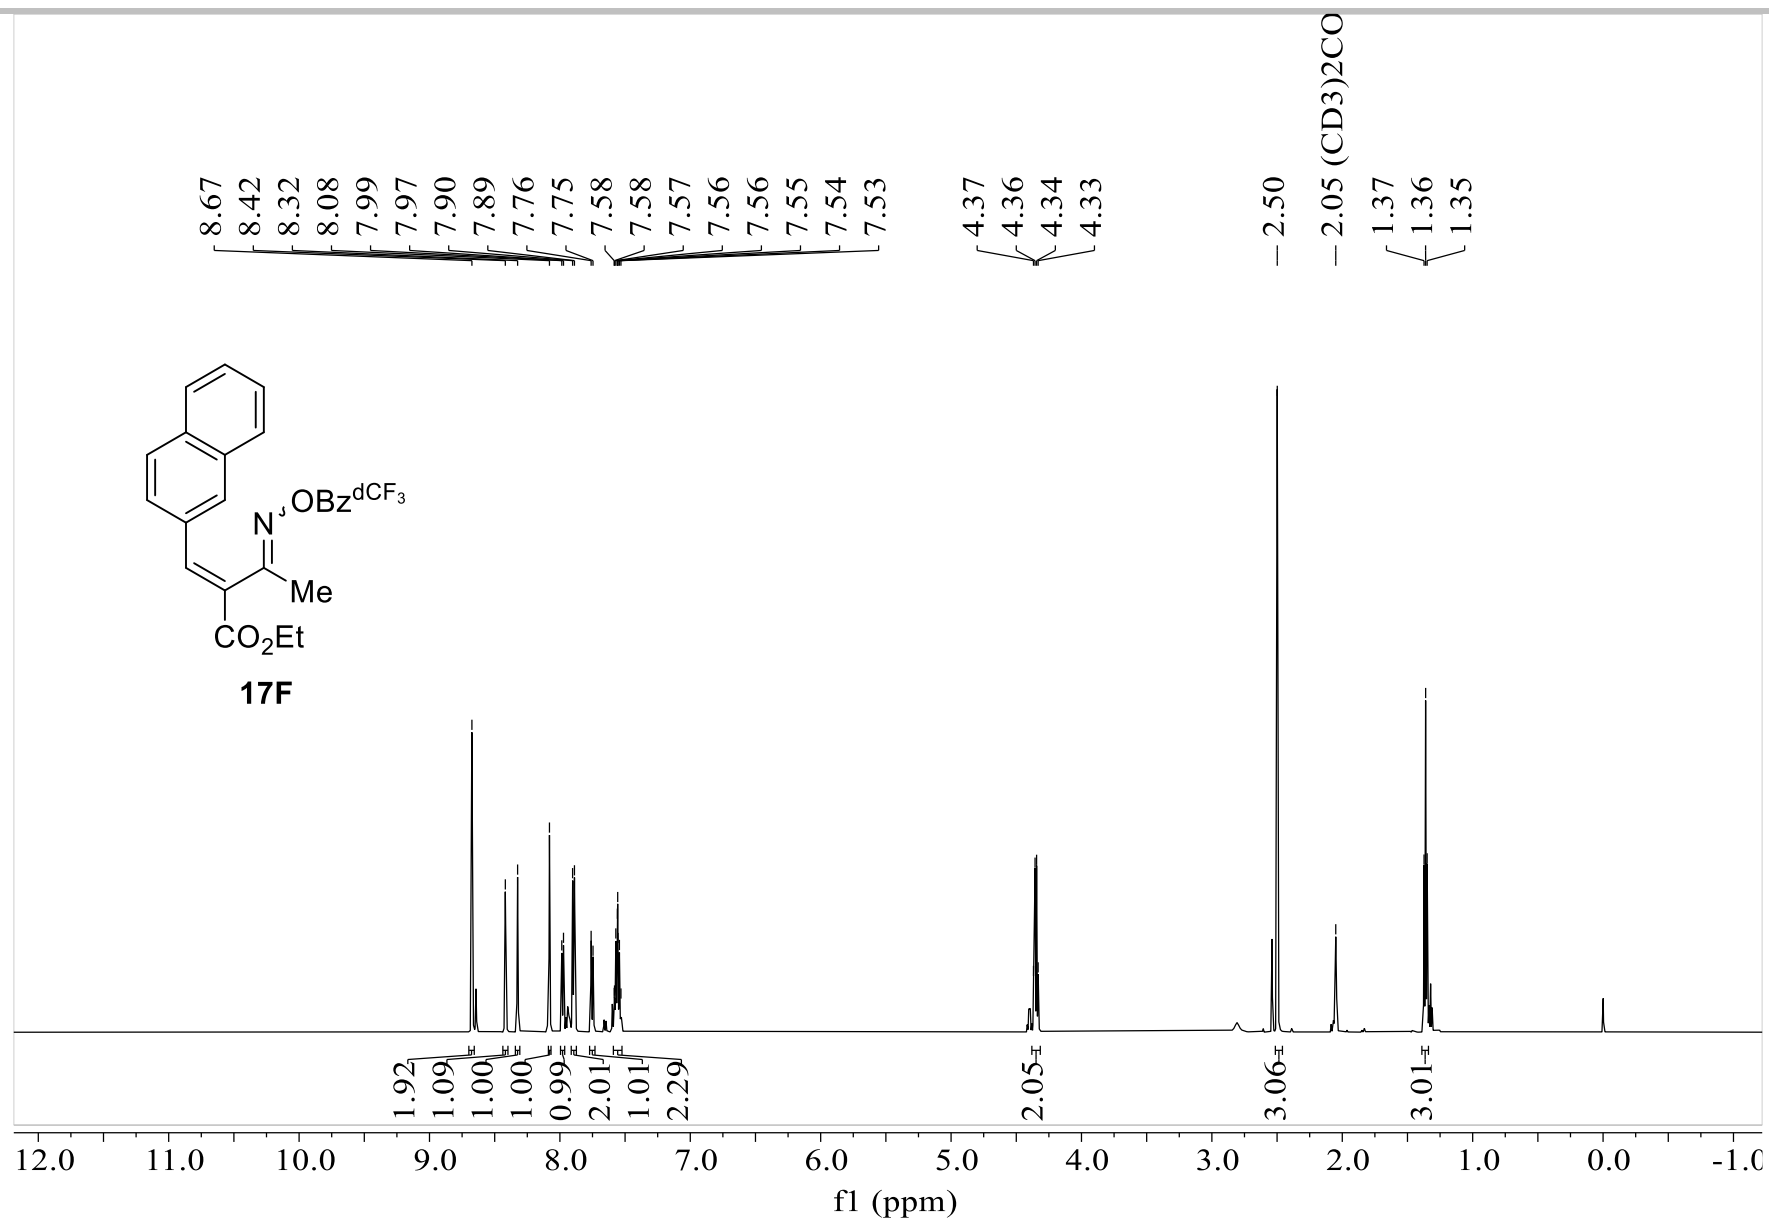

SUPPORTING INFORMATION

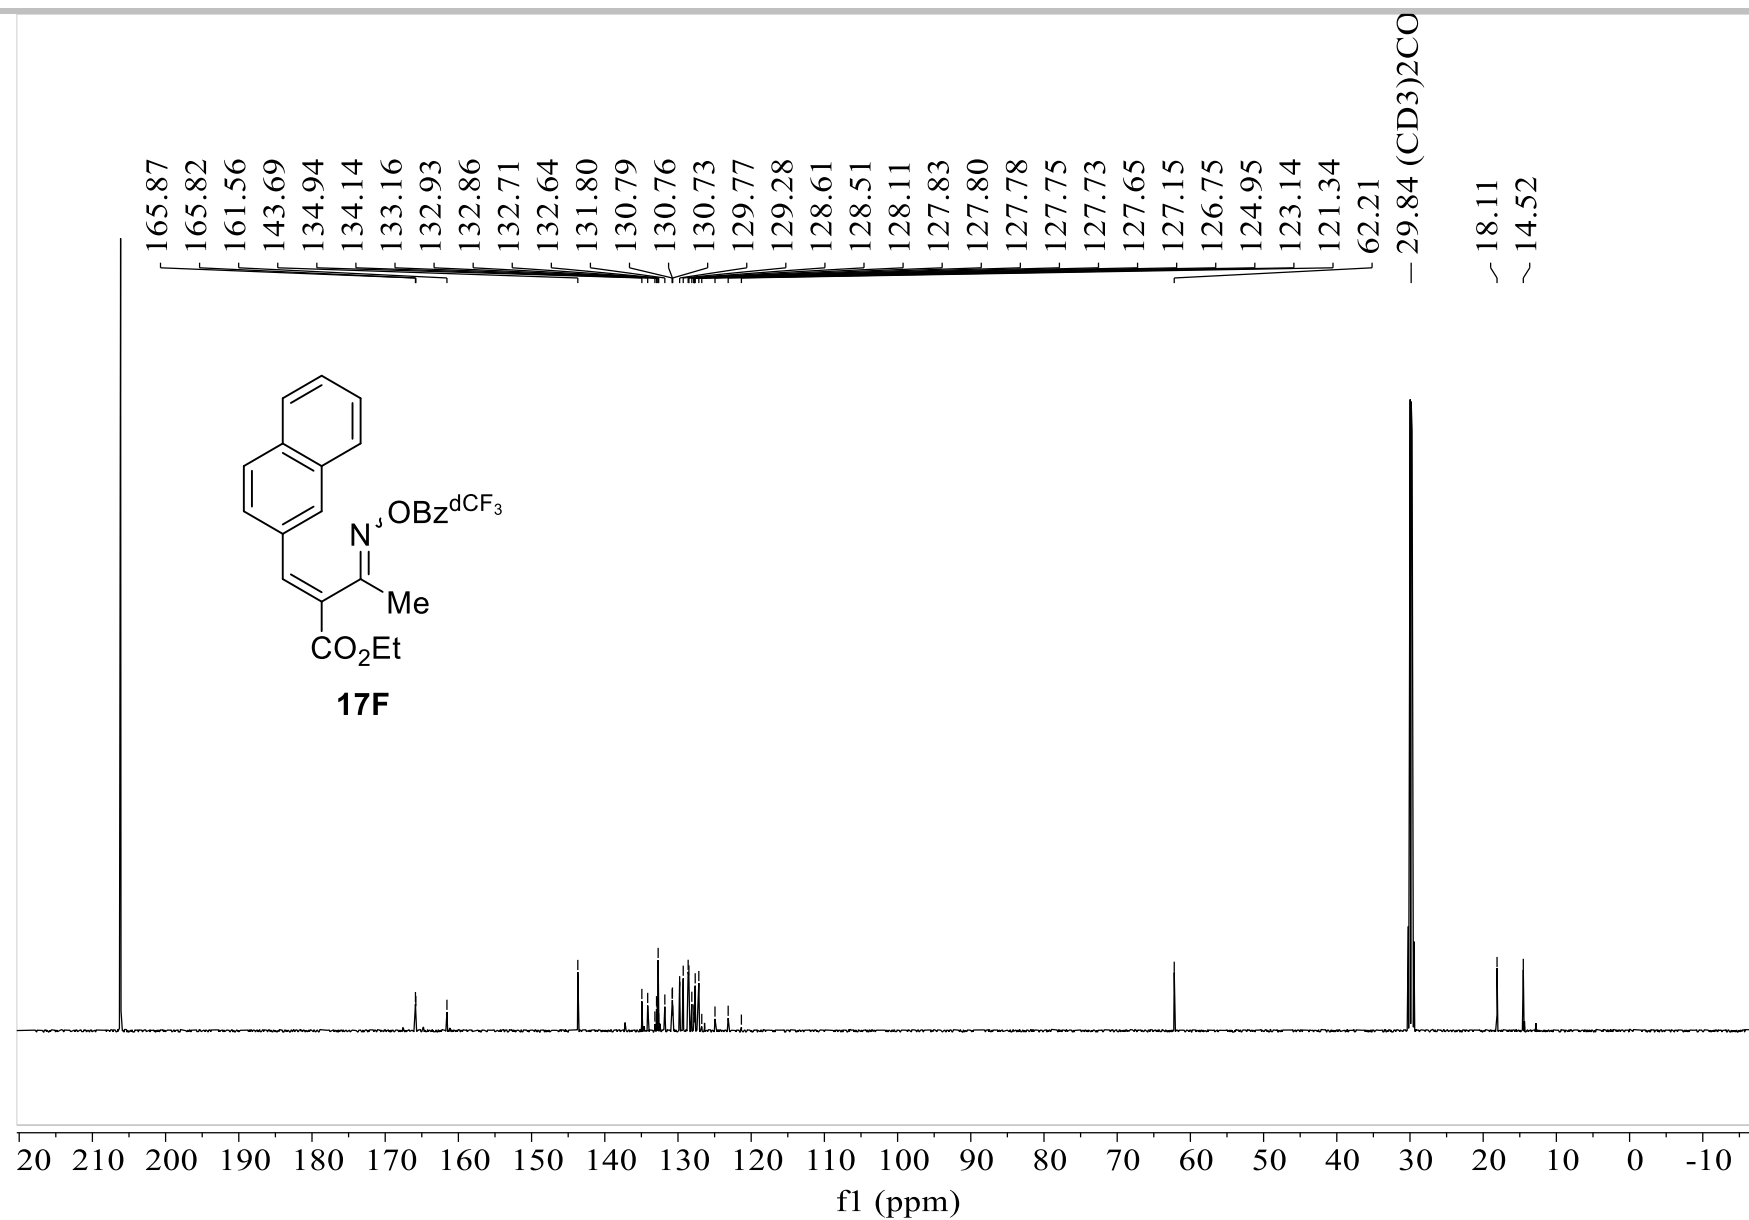

# SUPPORTING INFORMATION

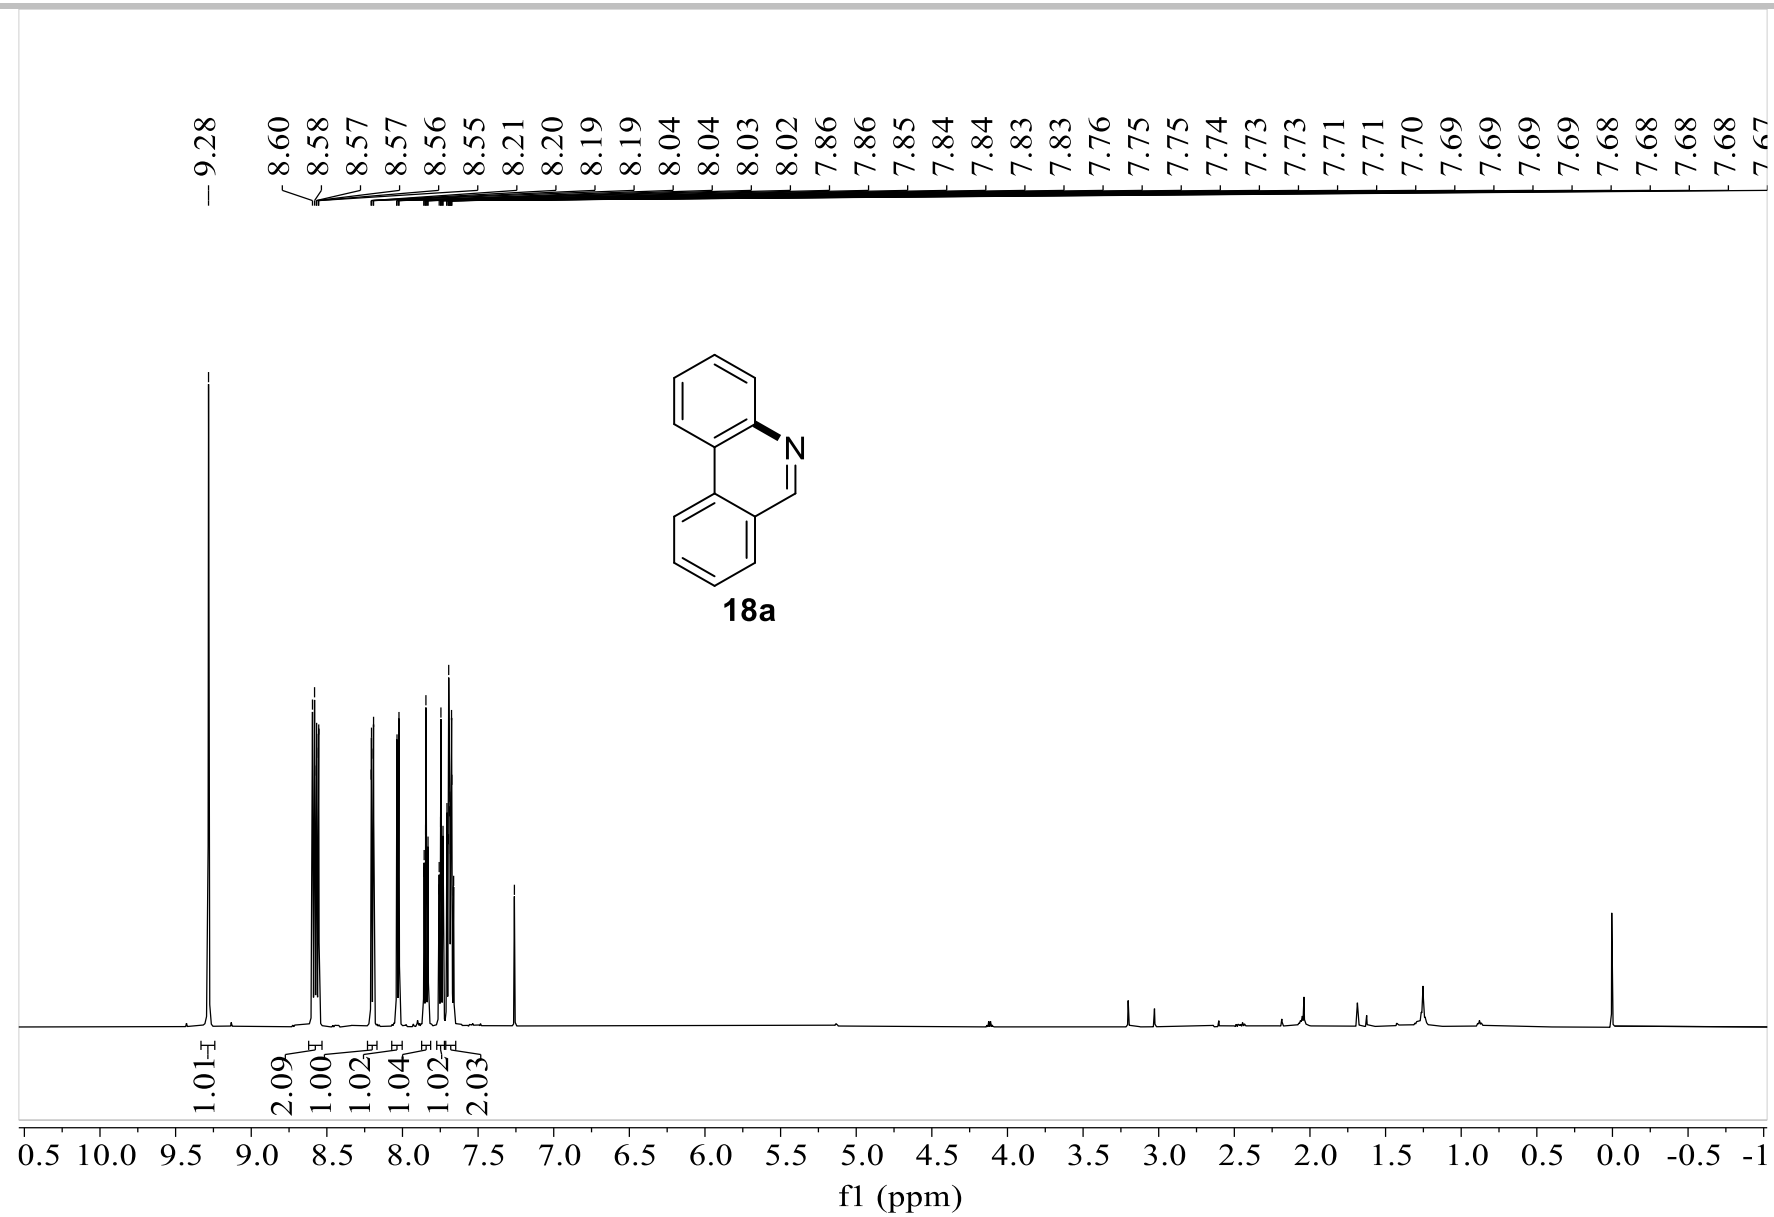



# SUPPORTING INFORMATION

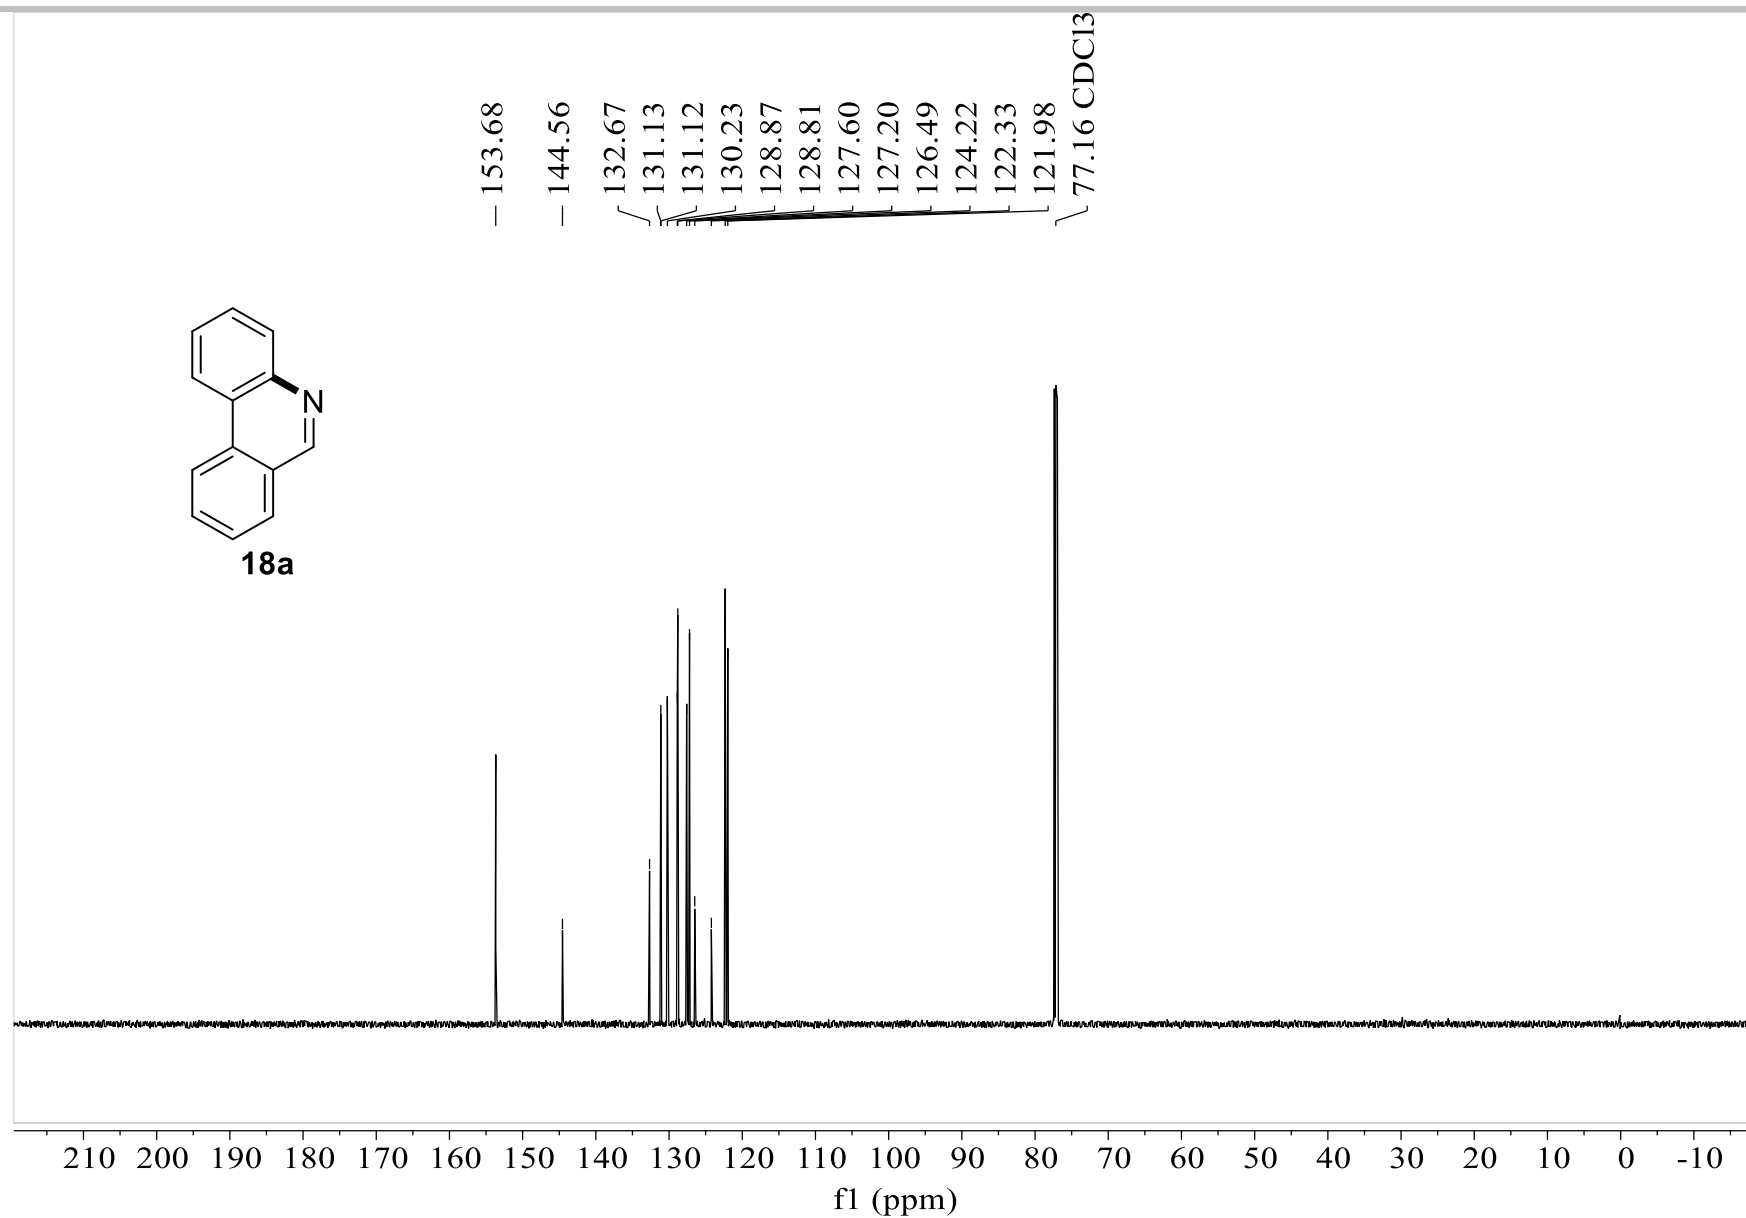

# SUPPORTING INFORMATION

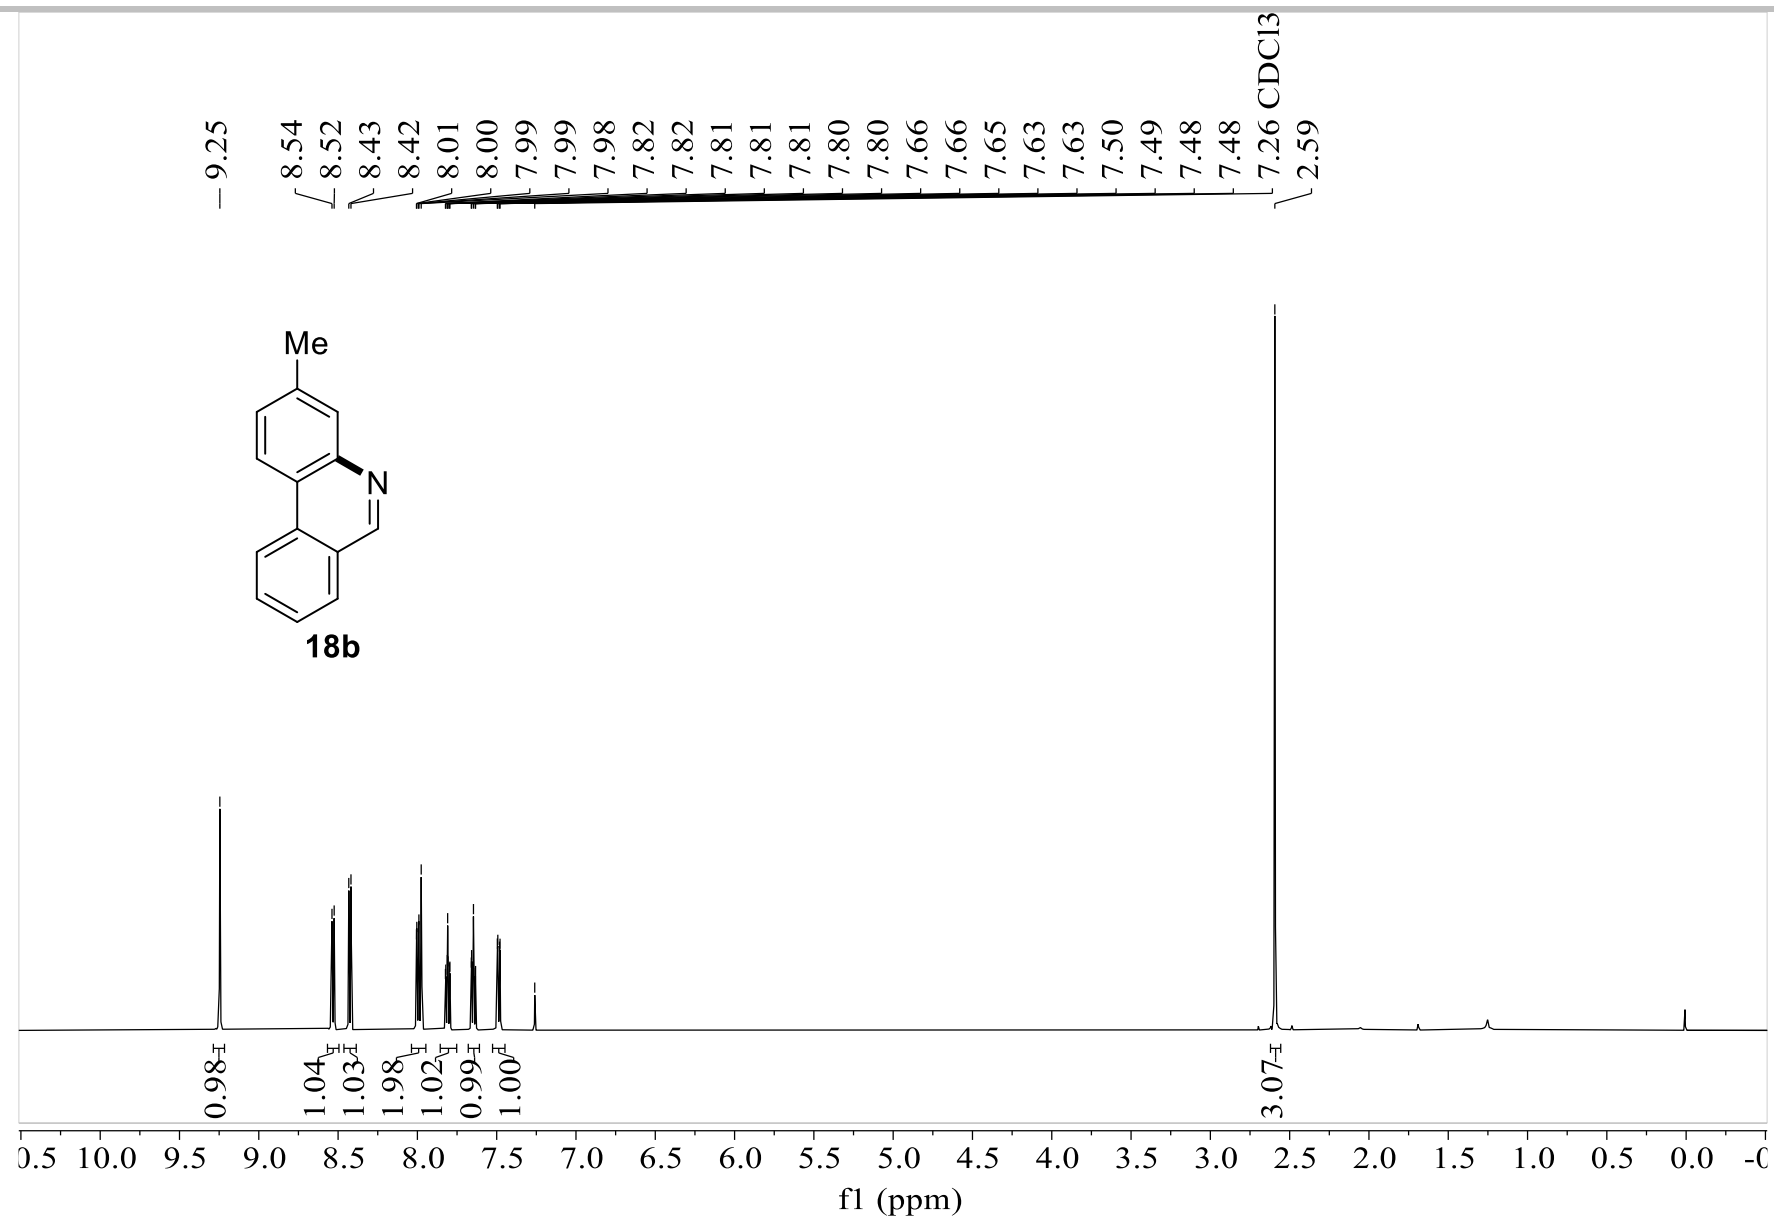

SUPPORTING INFORMATION

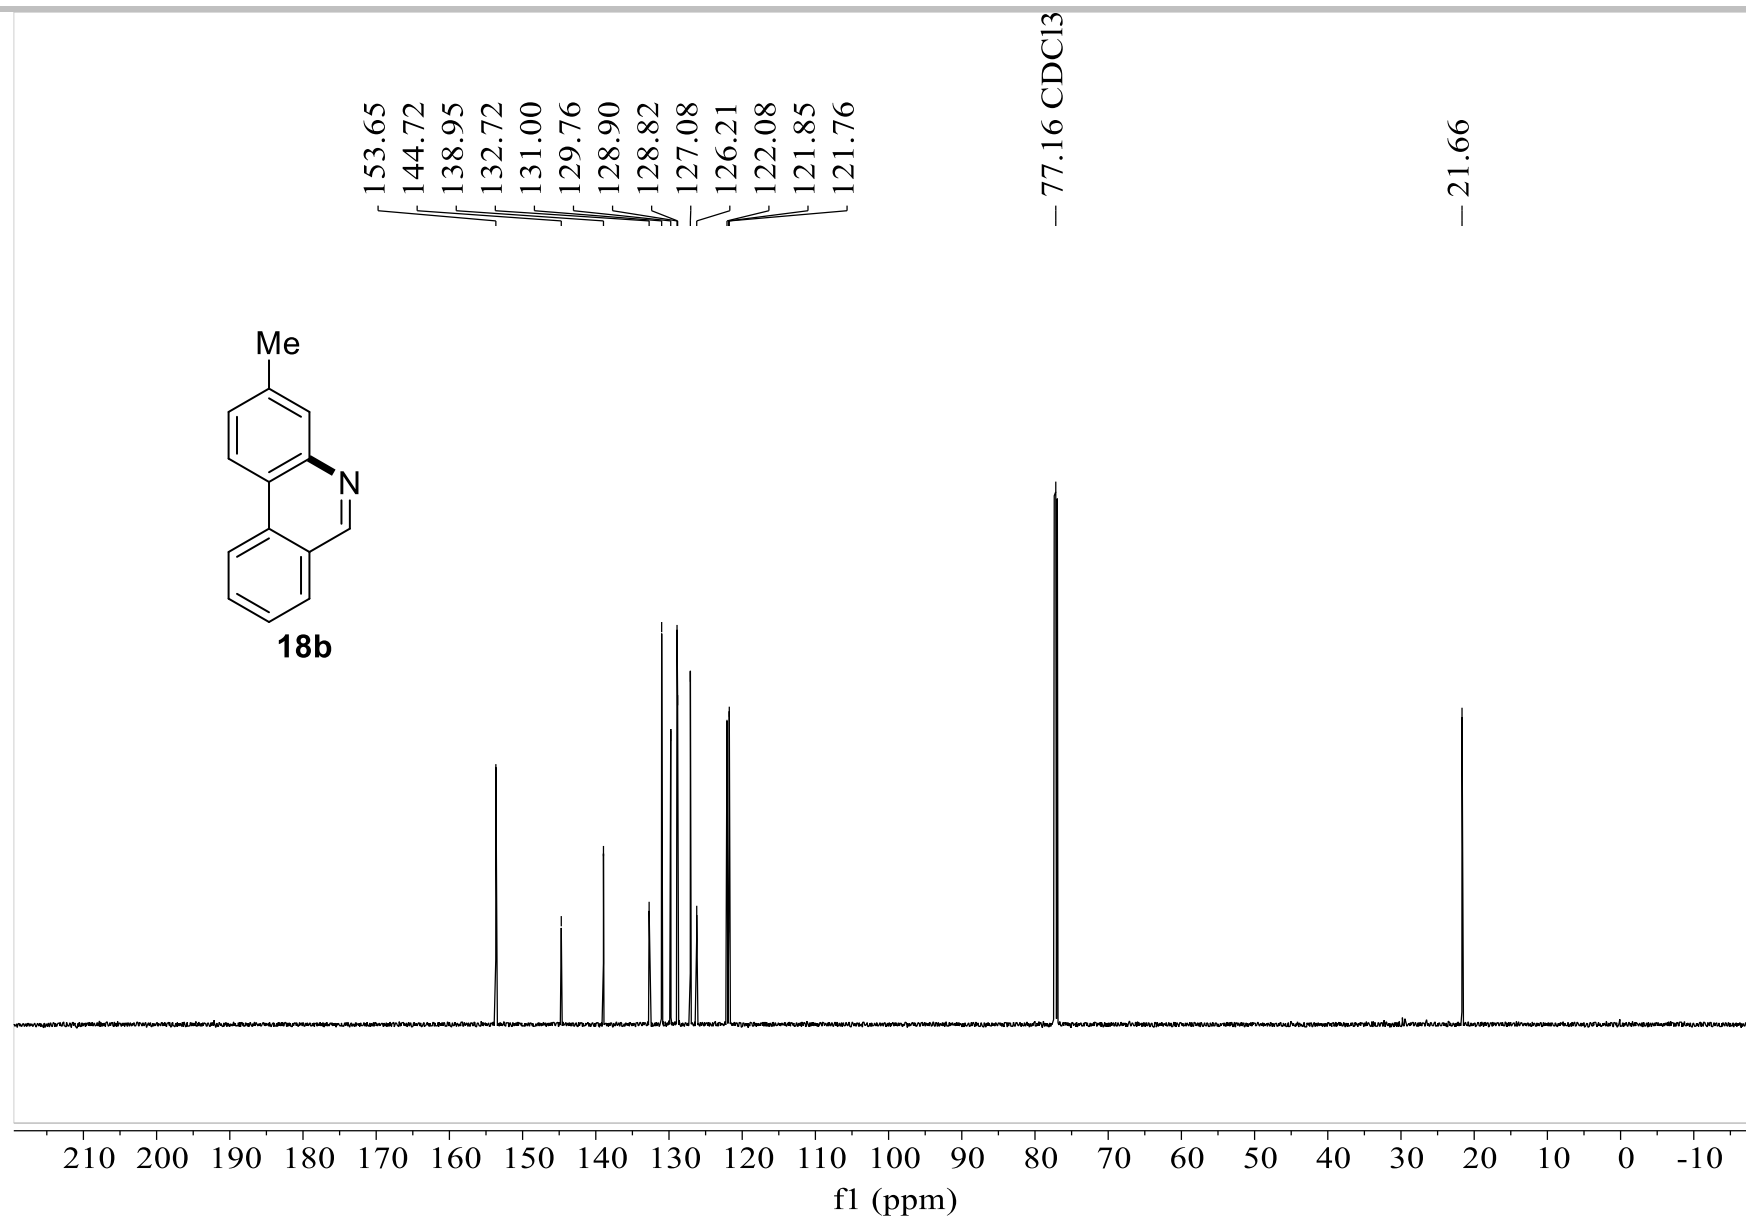

SUPPORTING INFORMATION

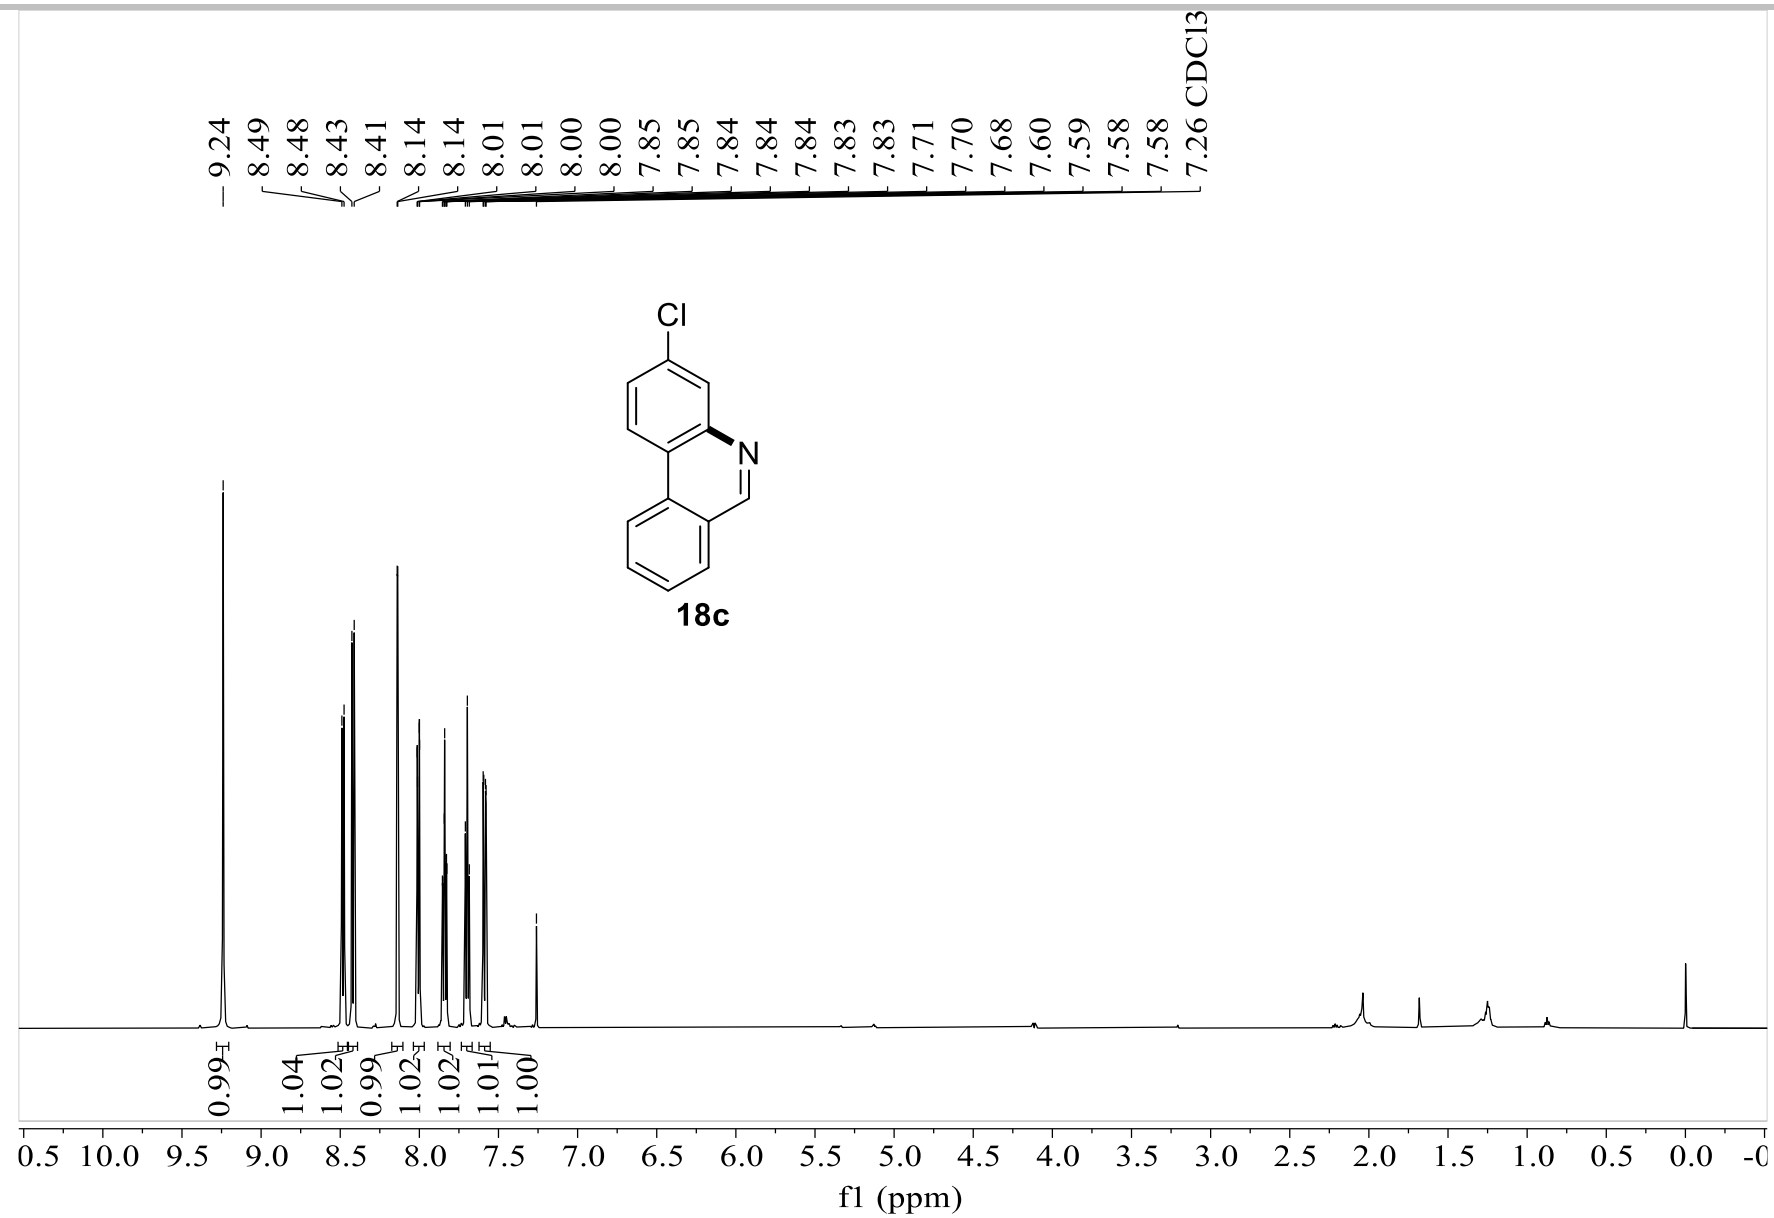

SUPPORTING INFORMATION

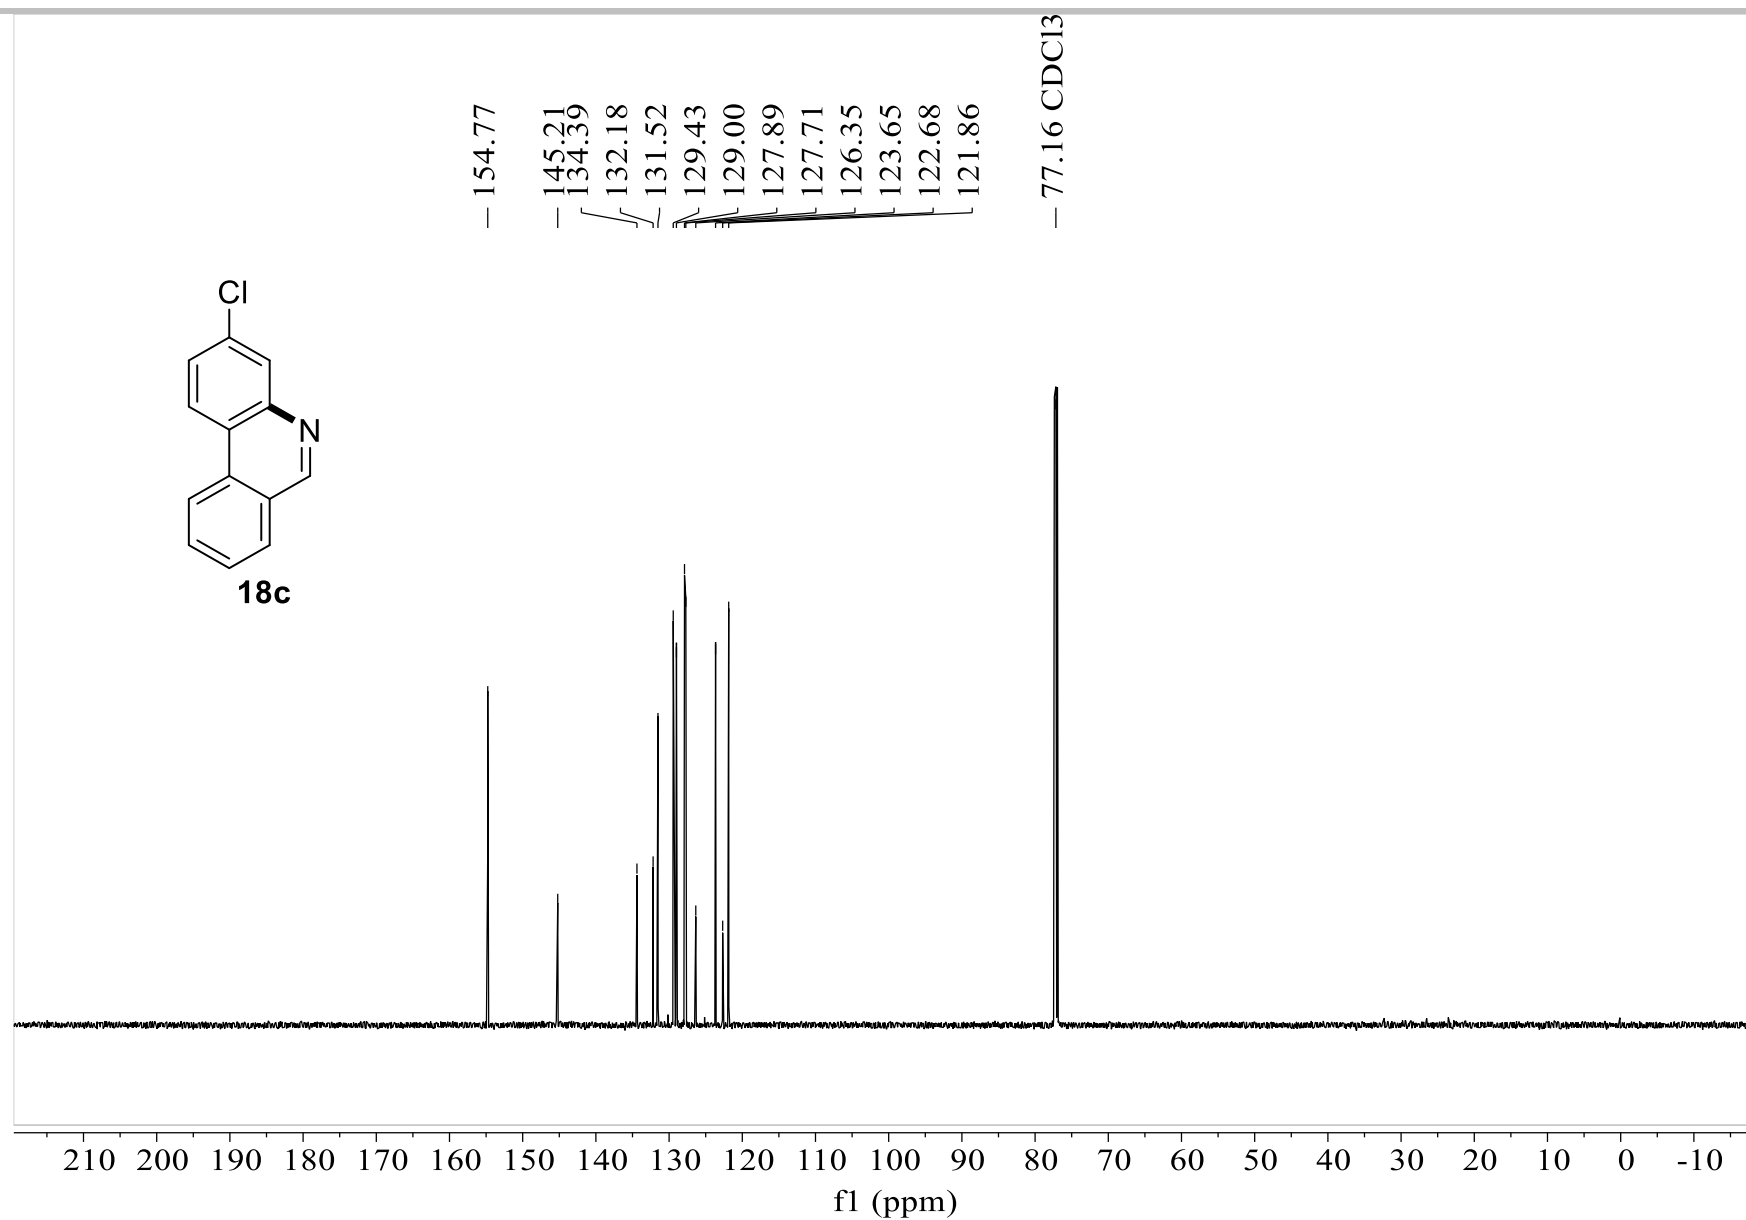

SUPPORTING INFORMATION

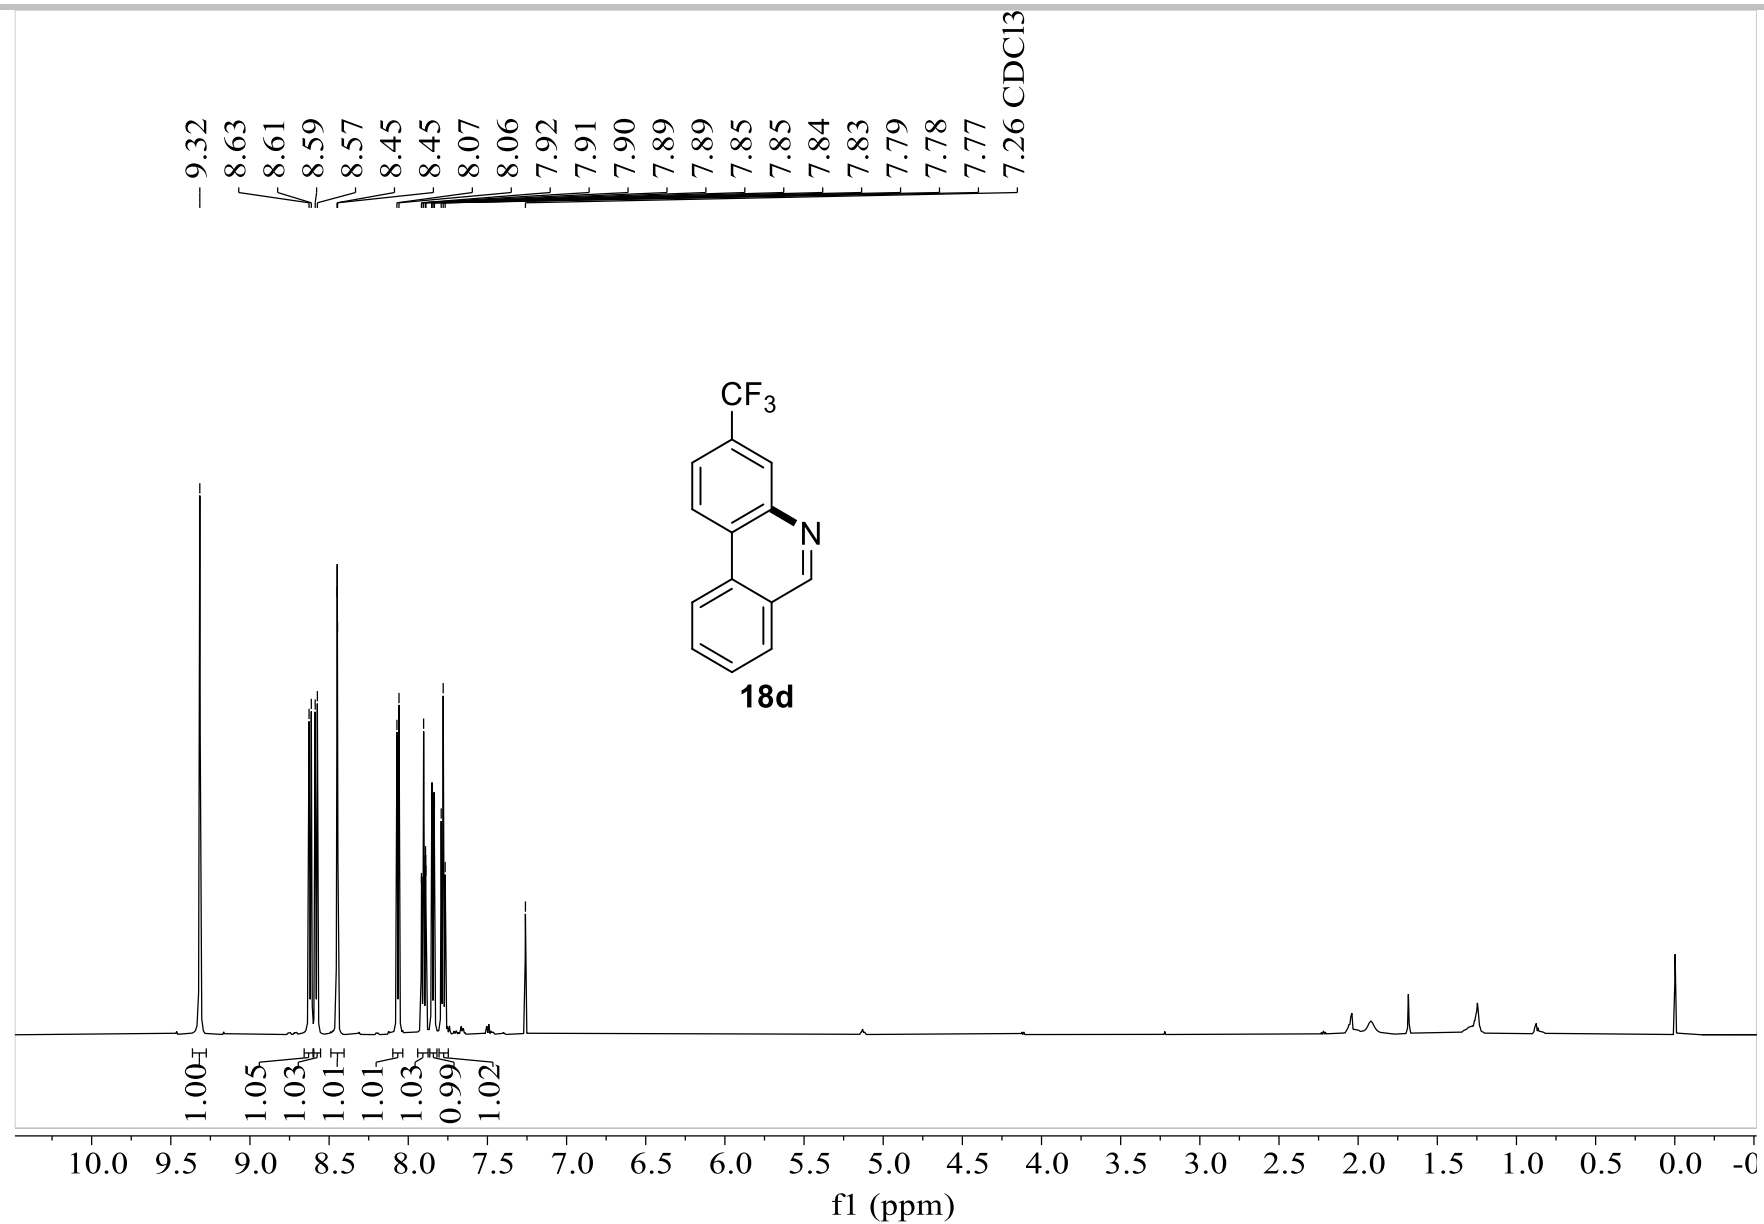

SUPPORTING INFORMATION

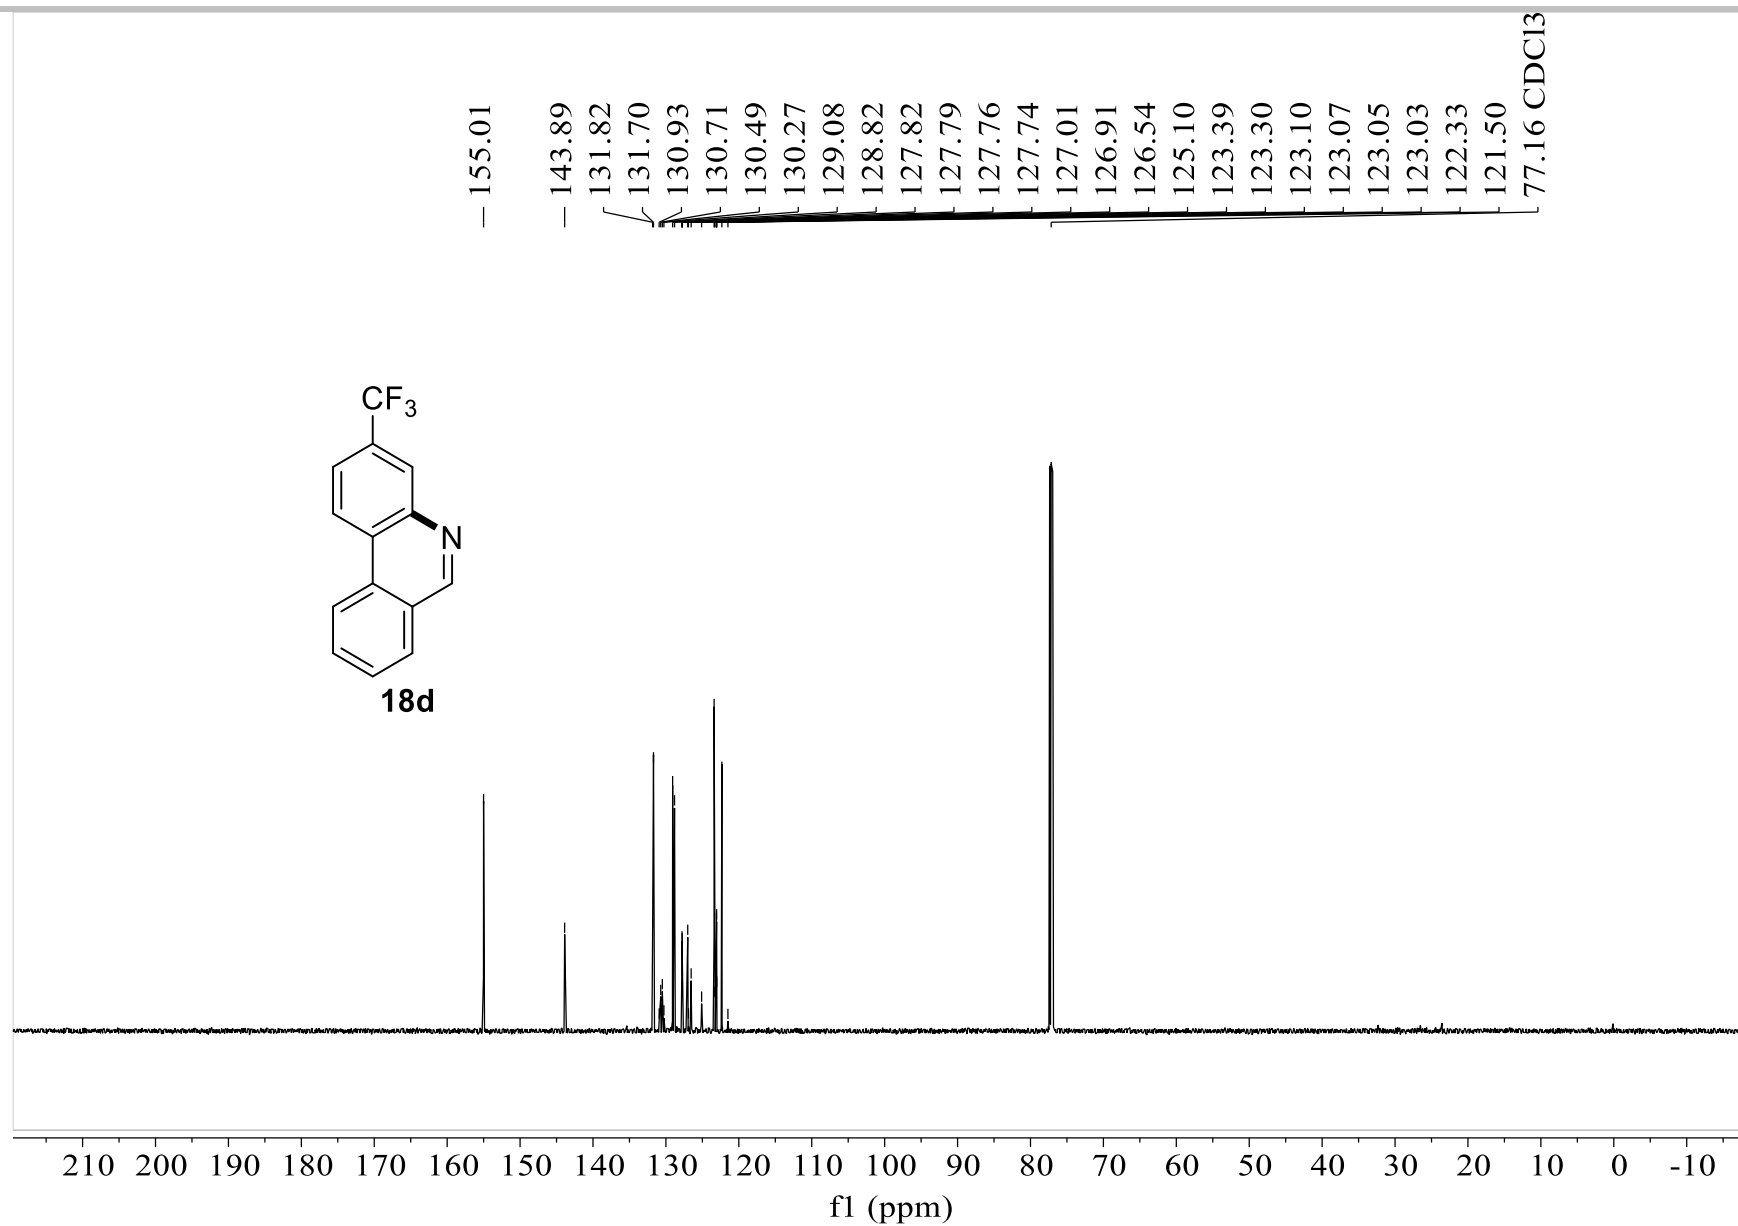

SUPPORTING INFORMATION

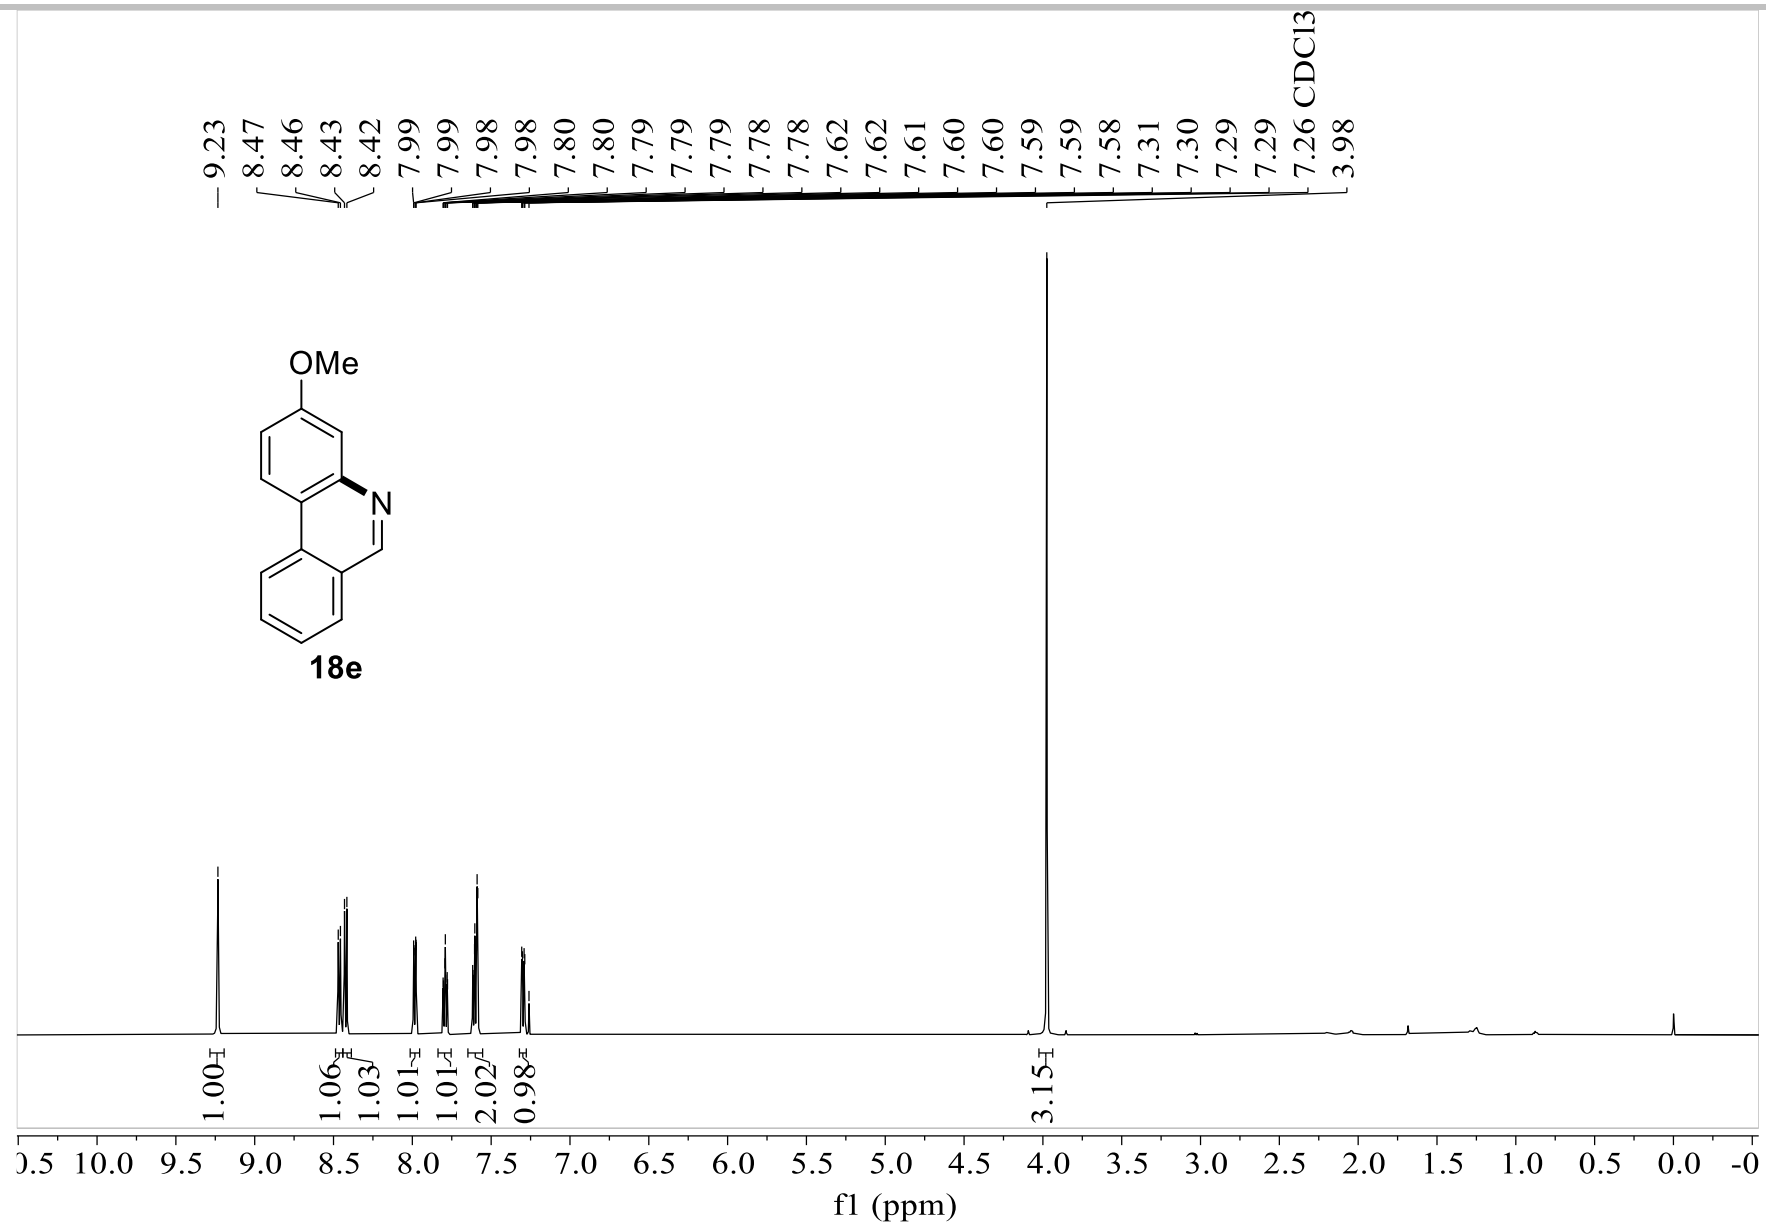



# SUPPORTING INFORMATION

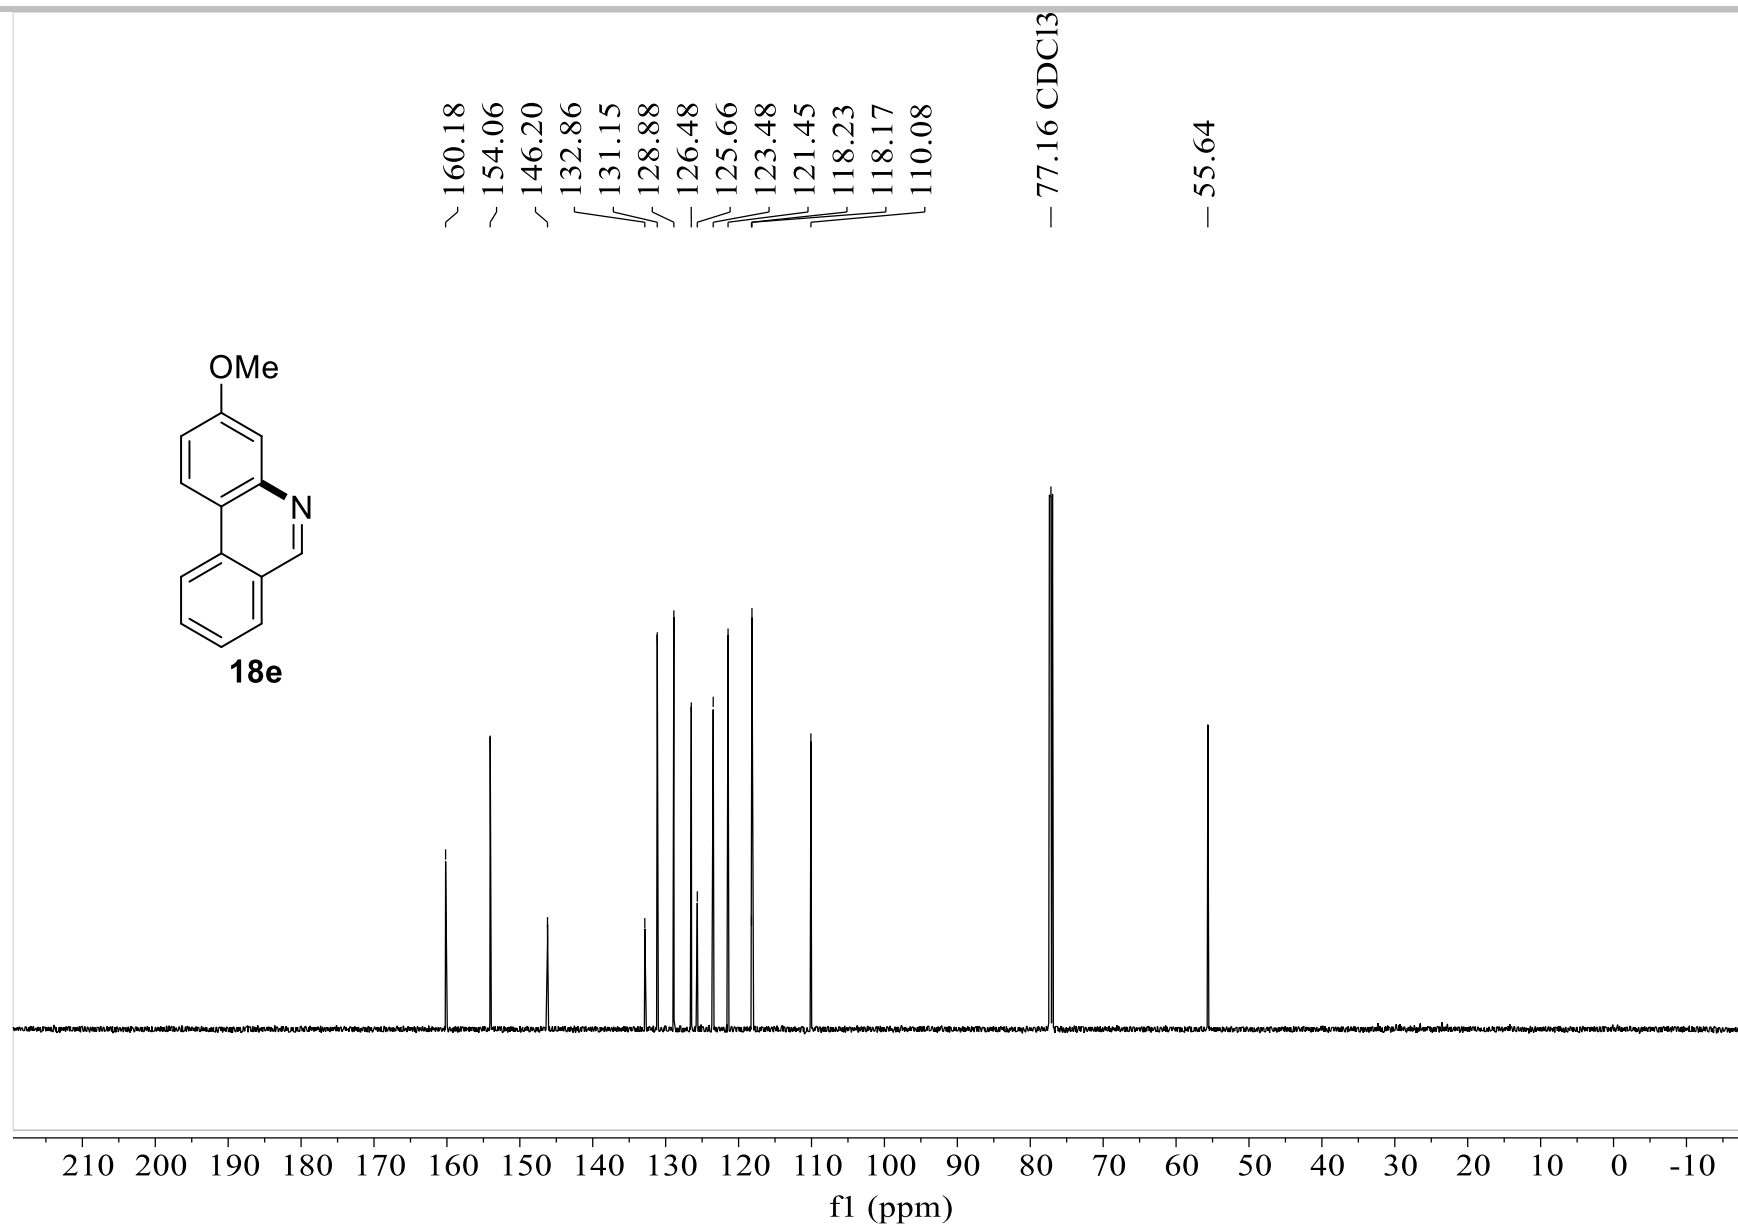

SUPPORTING INFORMATION

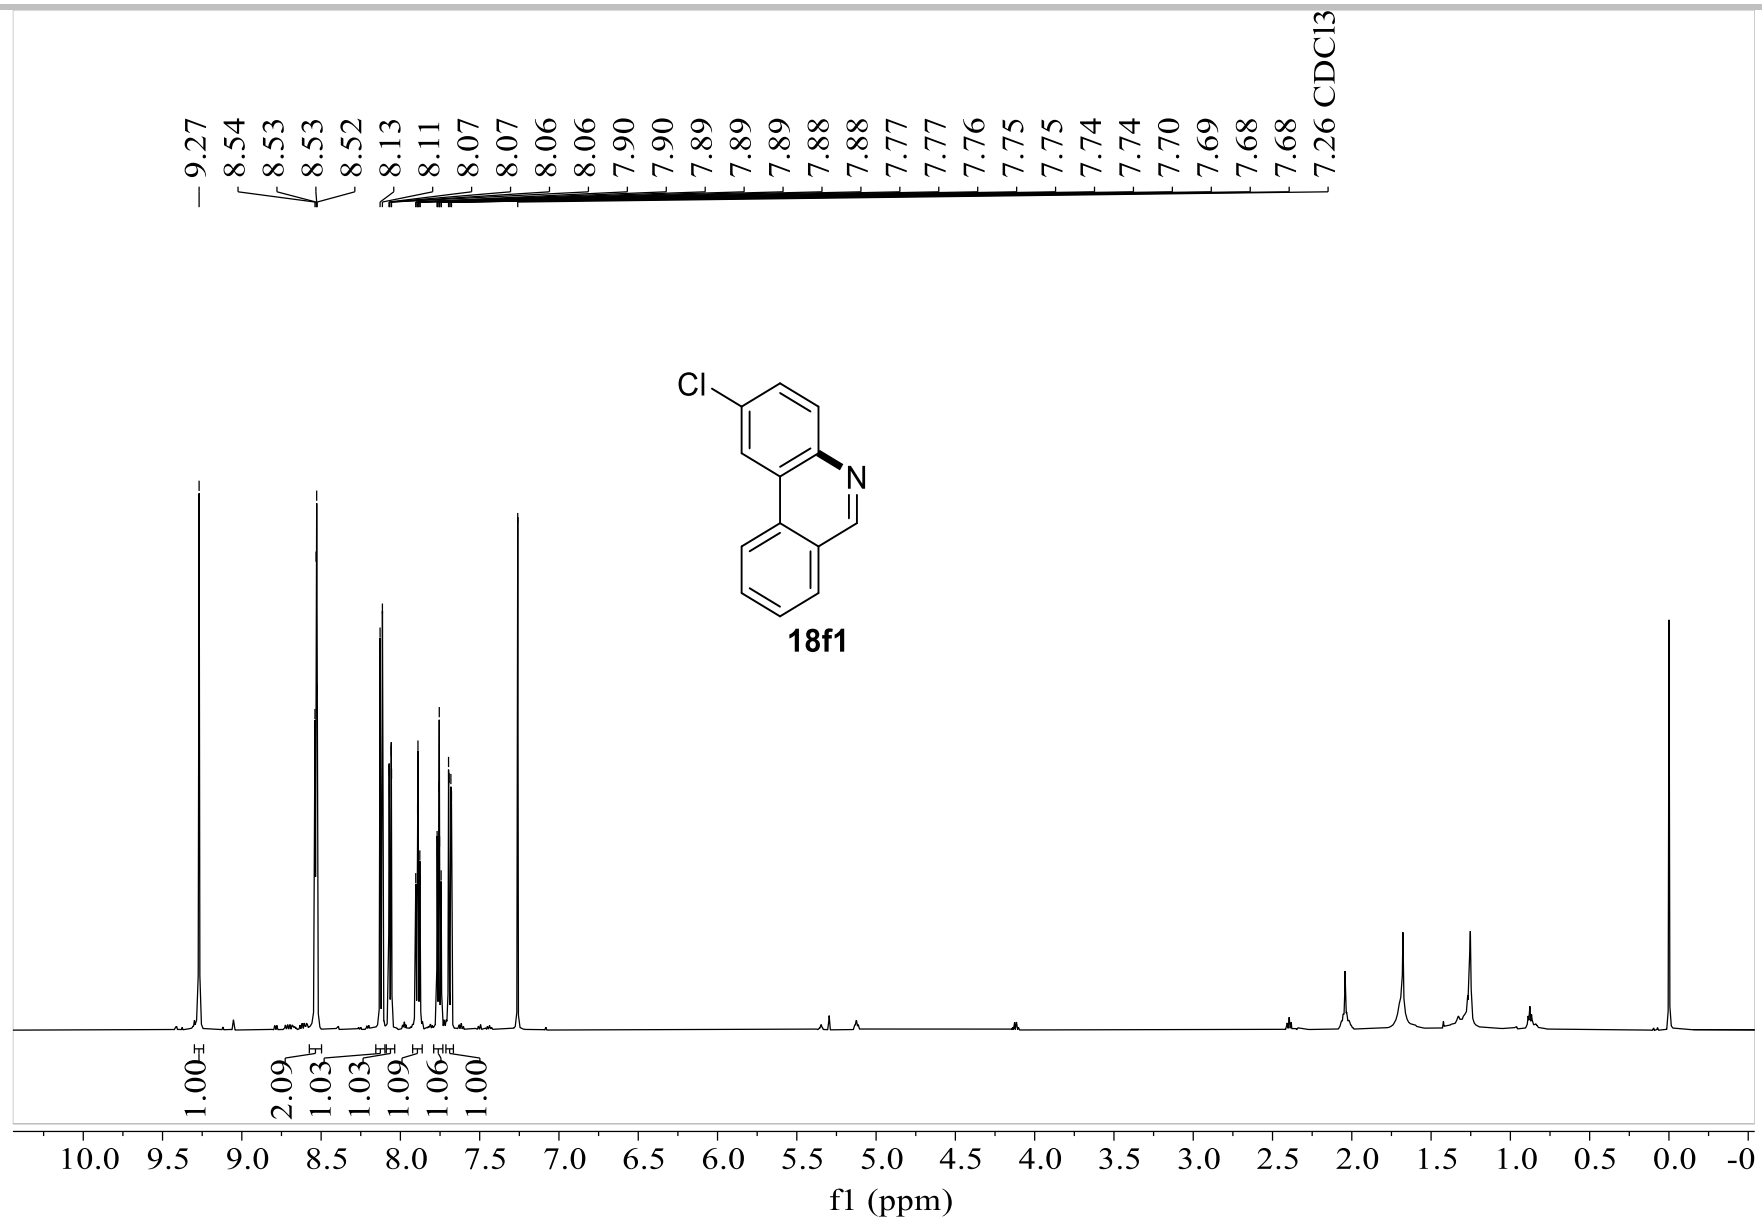

# SUPPORTING INFORMATION

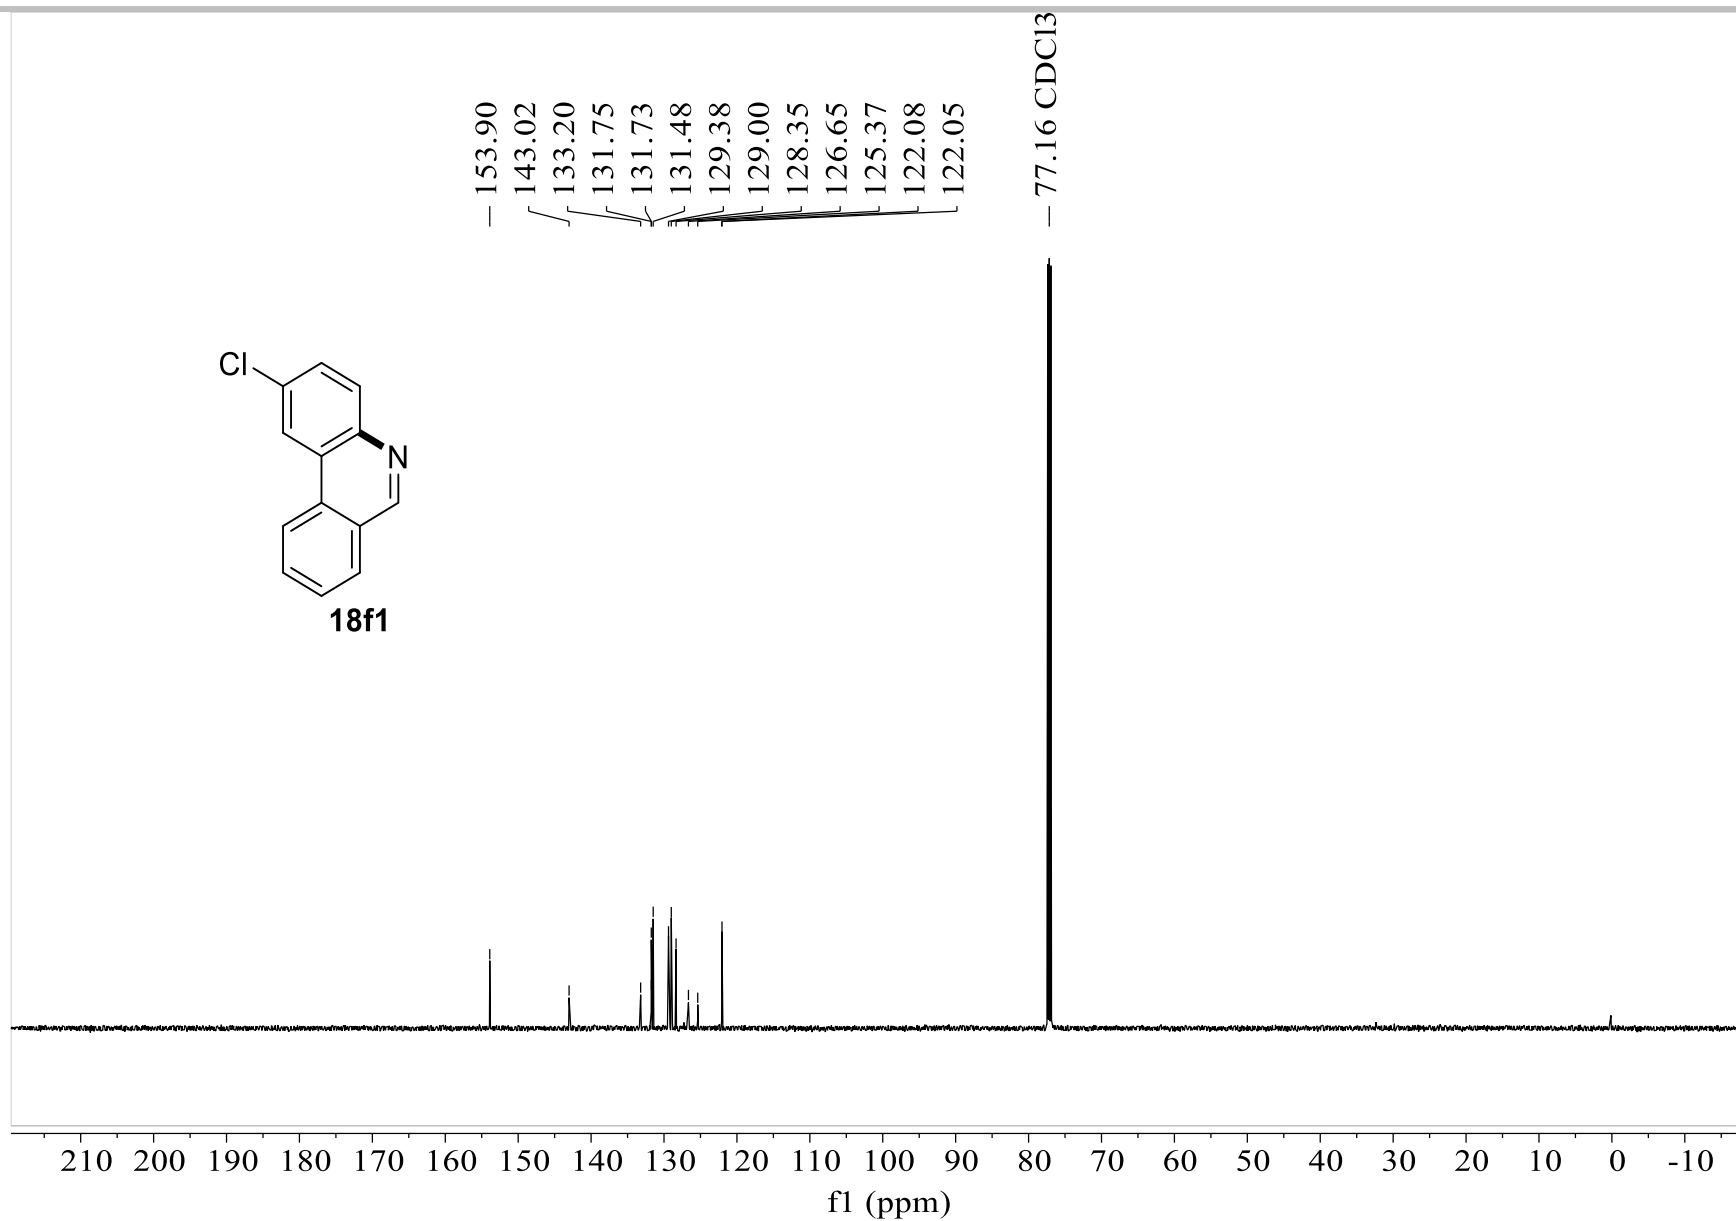

# SUPPORTING INFORMATION

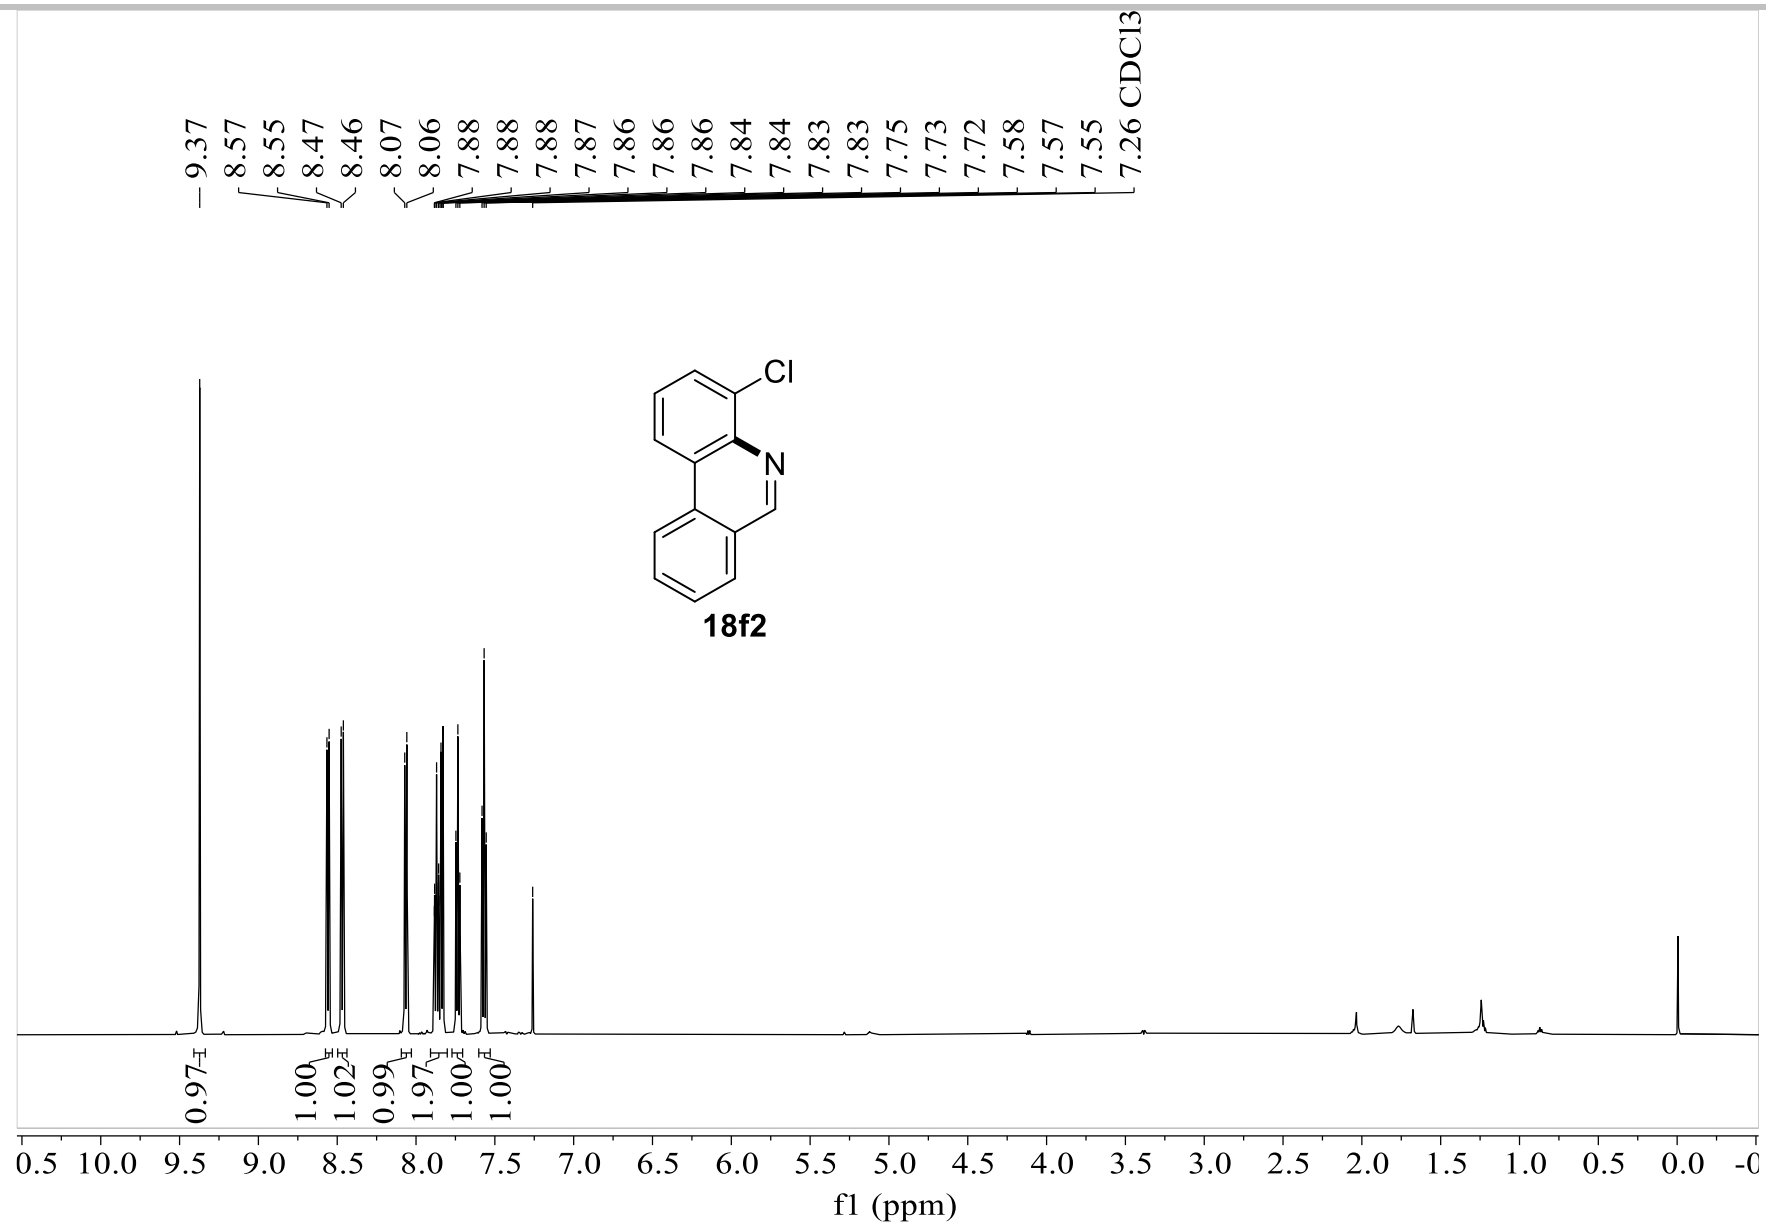

SUPPORTING INFORMATION

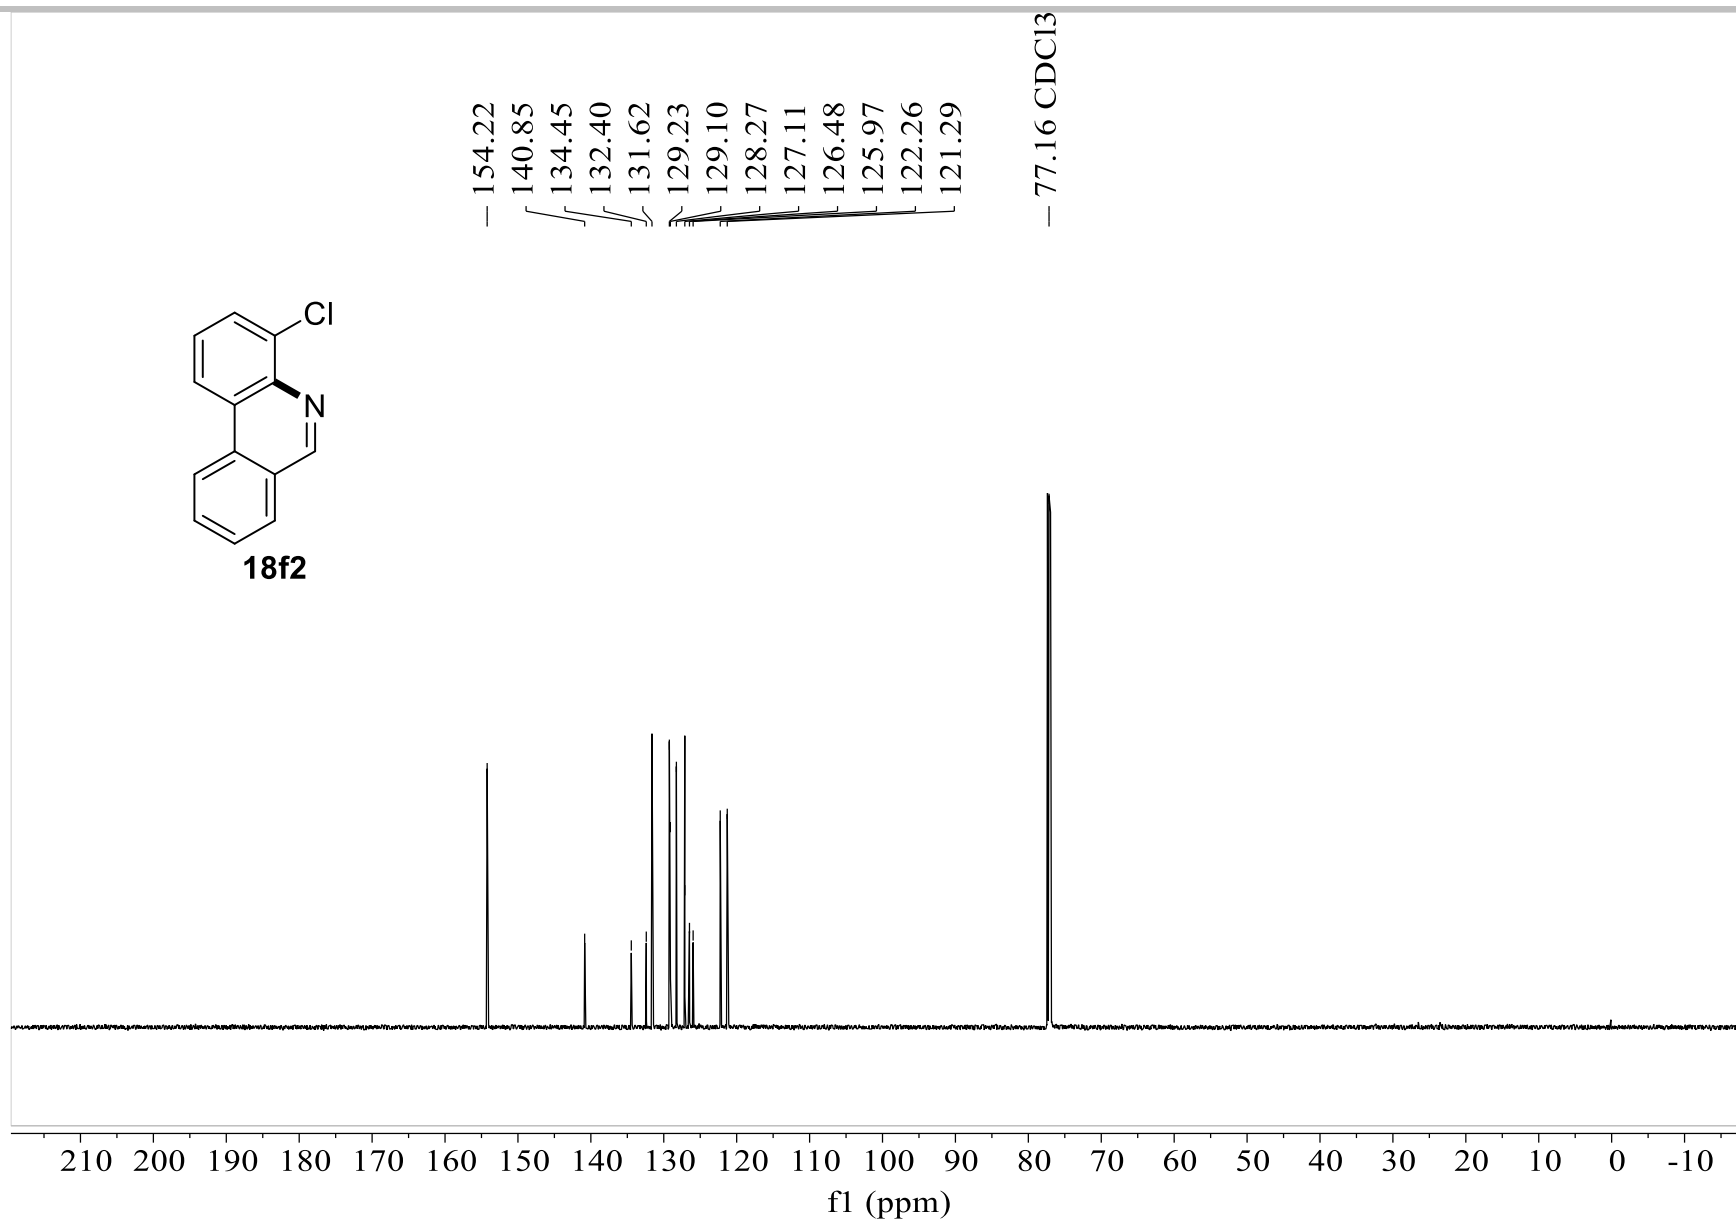

SUPPORTING INFORMATION

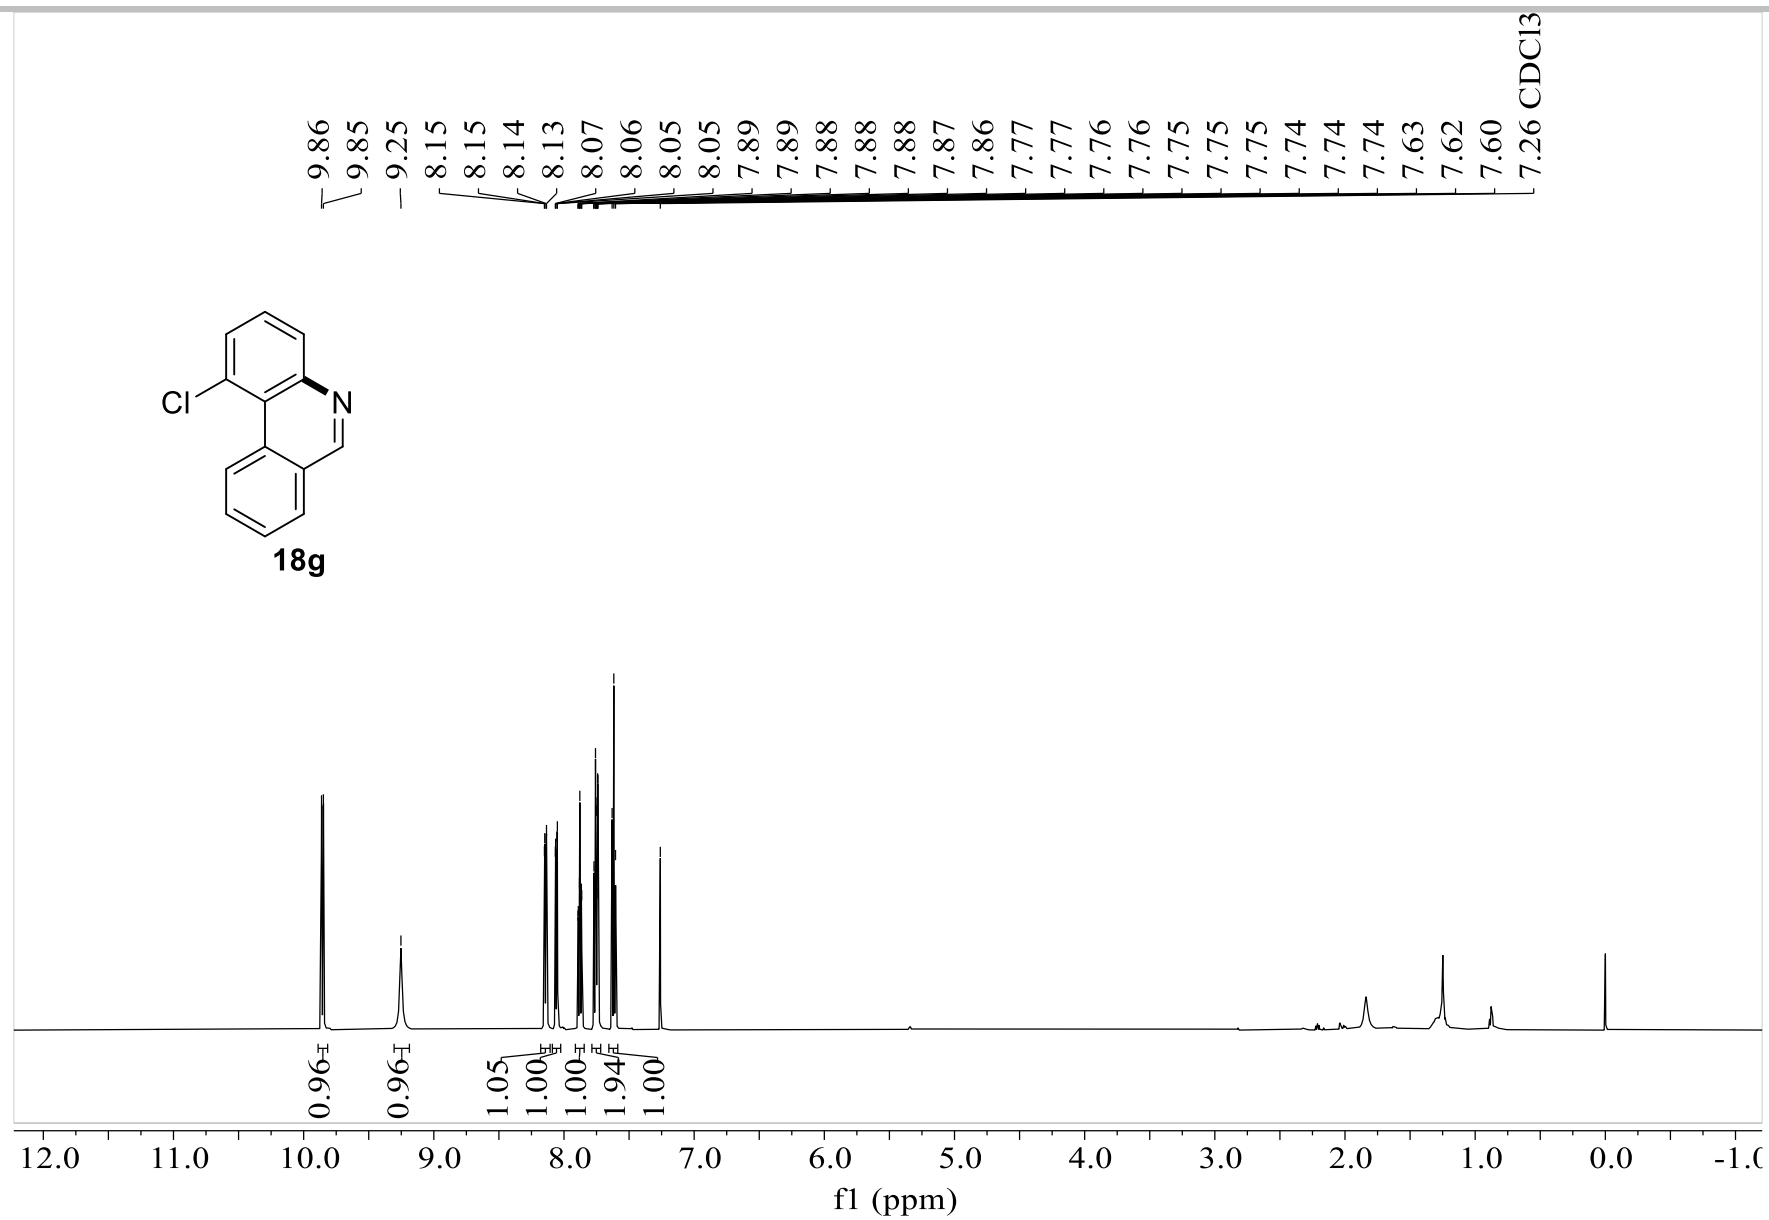

# SUPPORTING INFORMATION

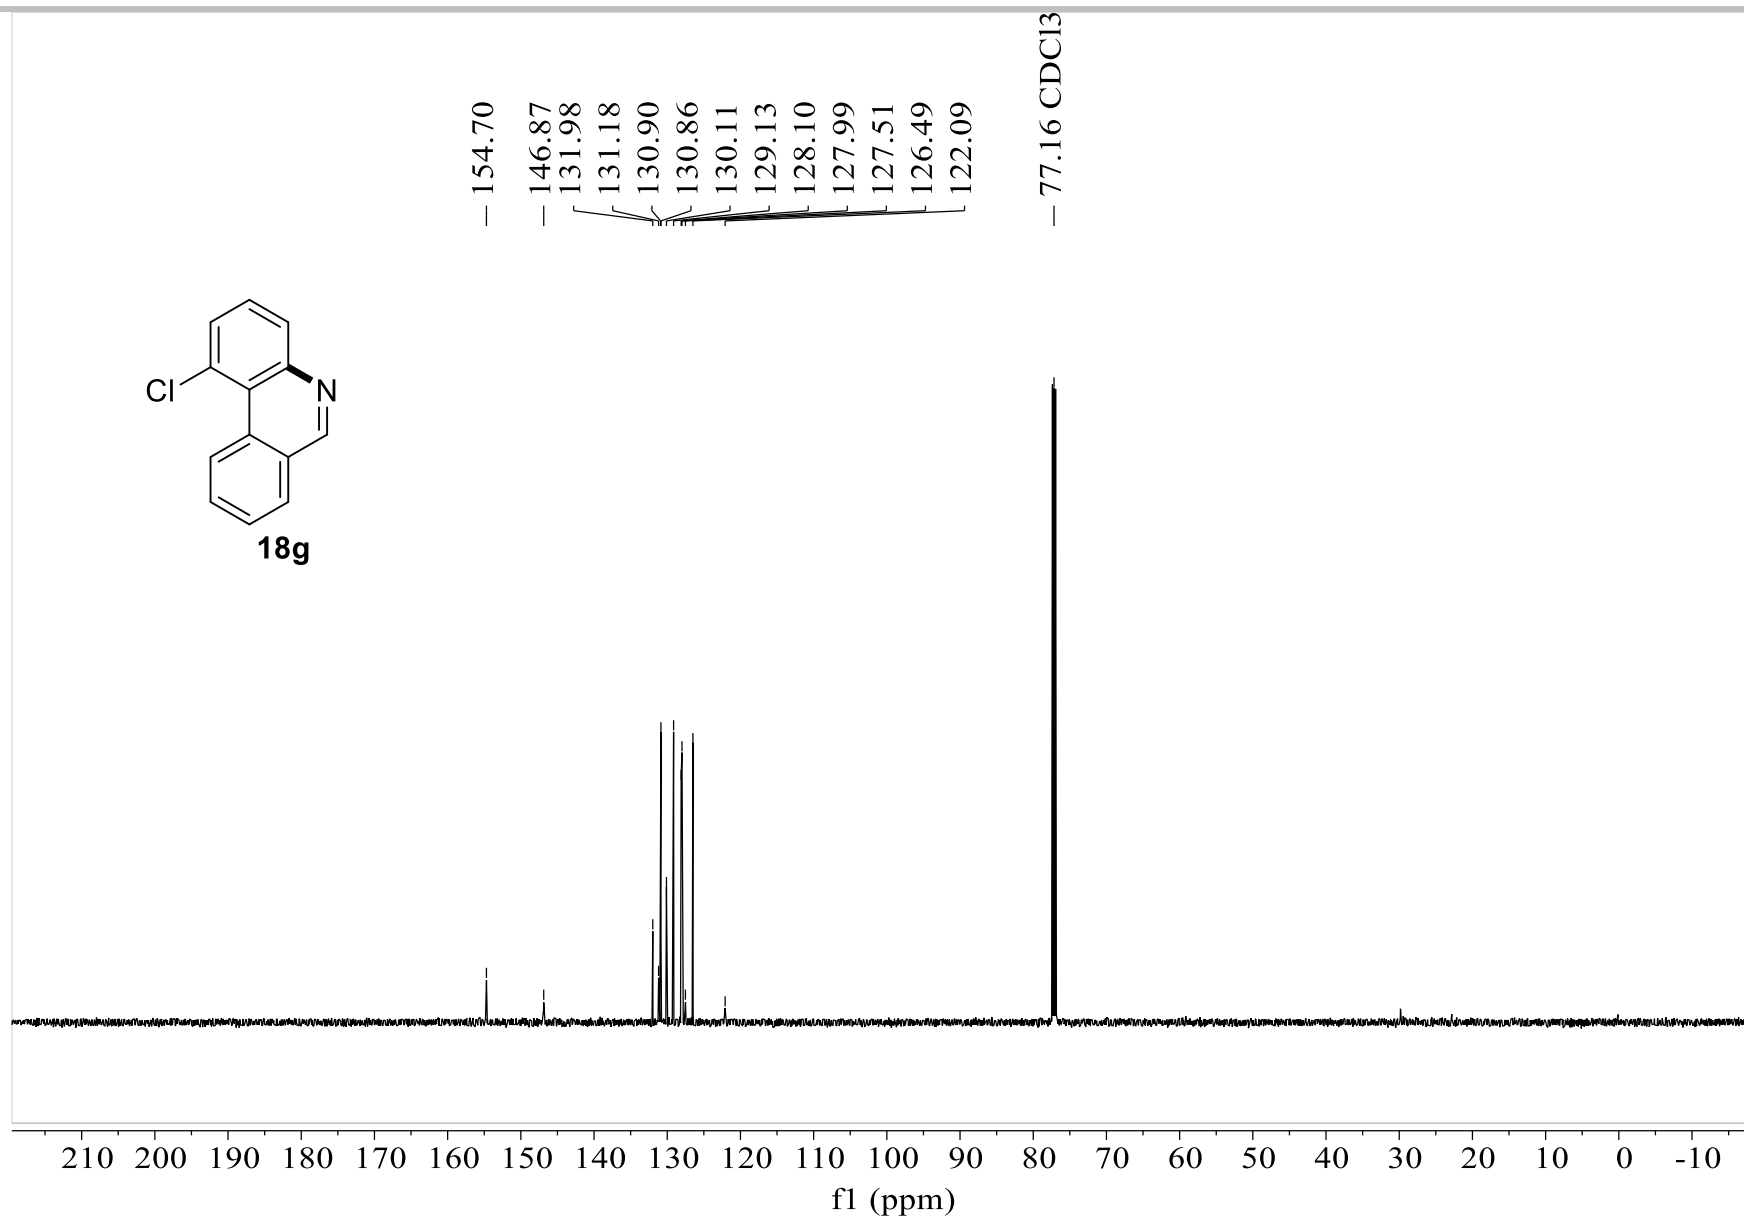

SUPPORTING INFORMATION

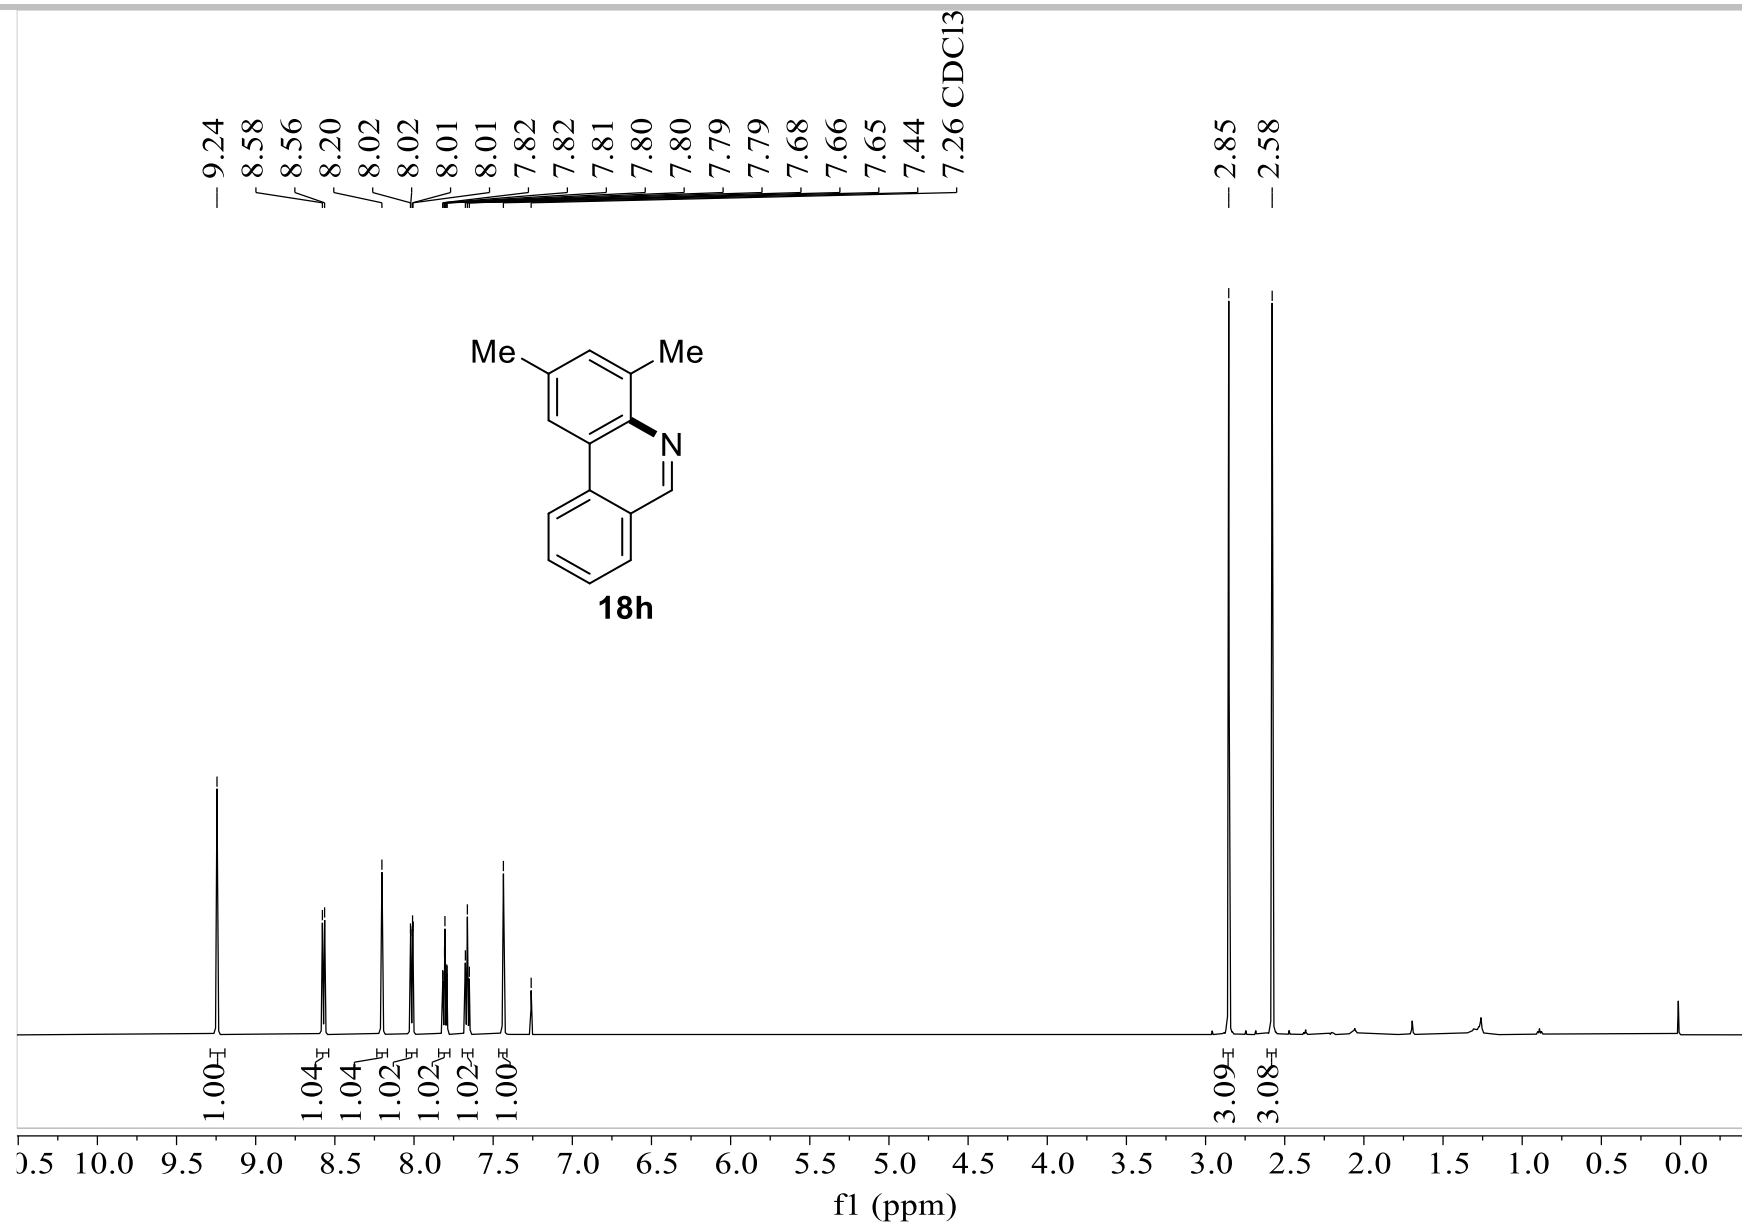



SUPPORTING INFORMATION

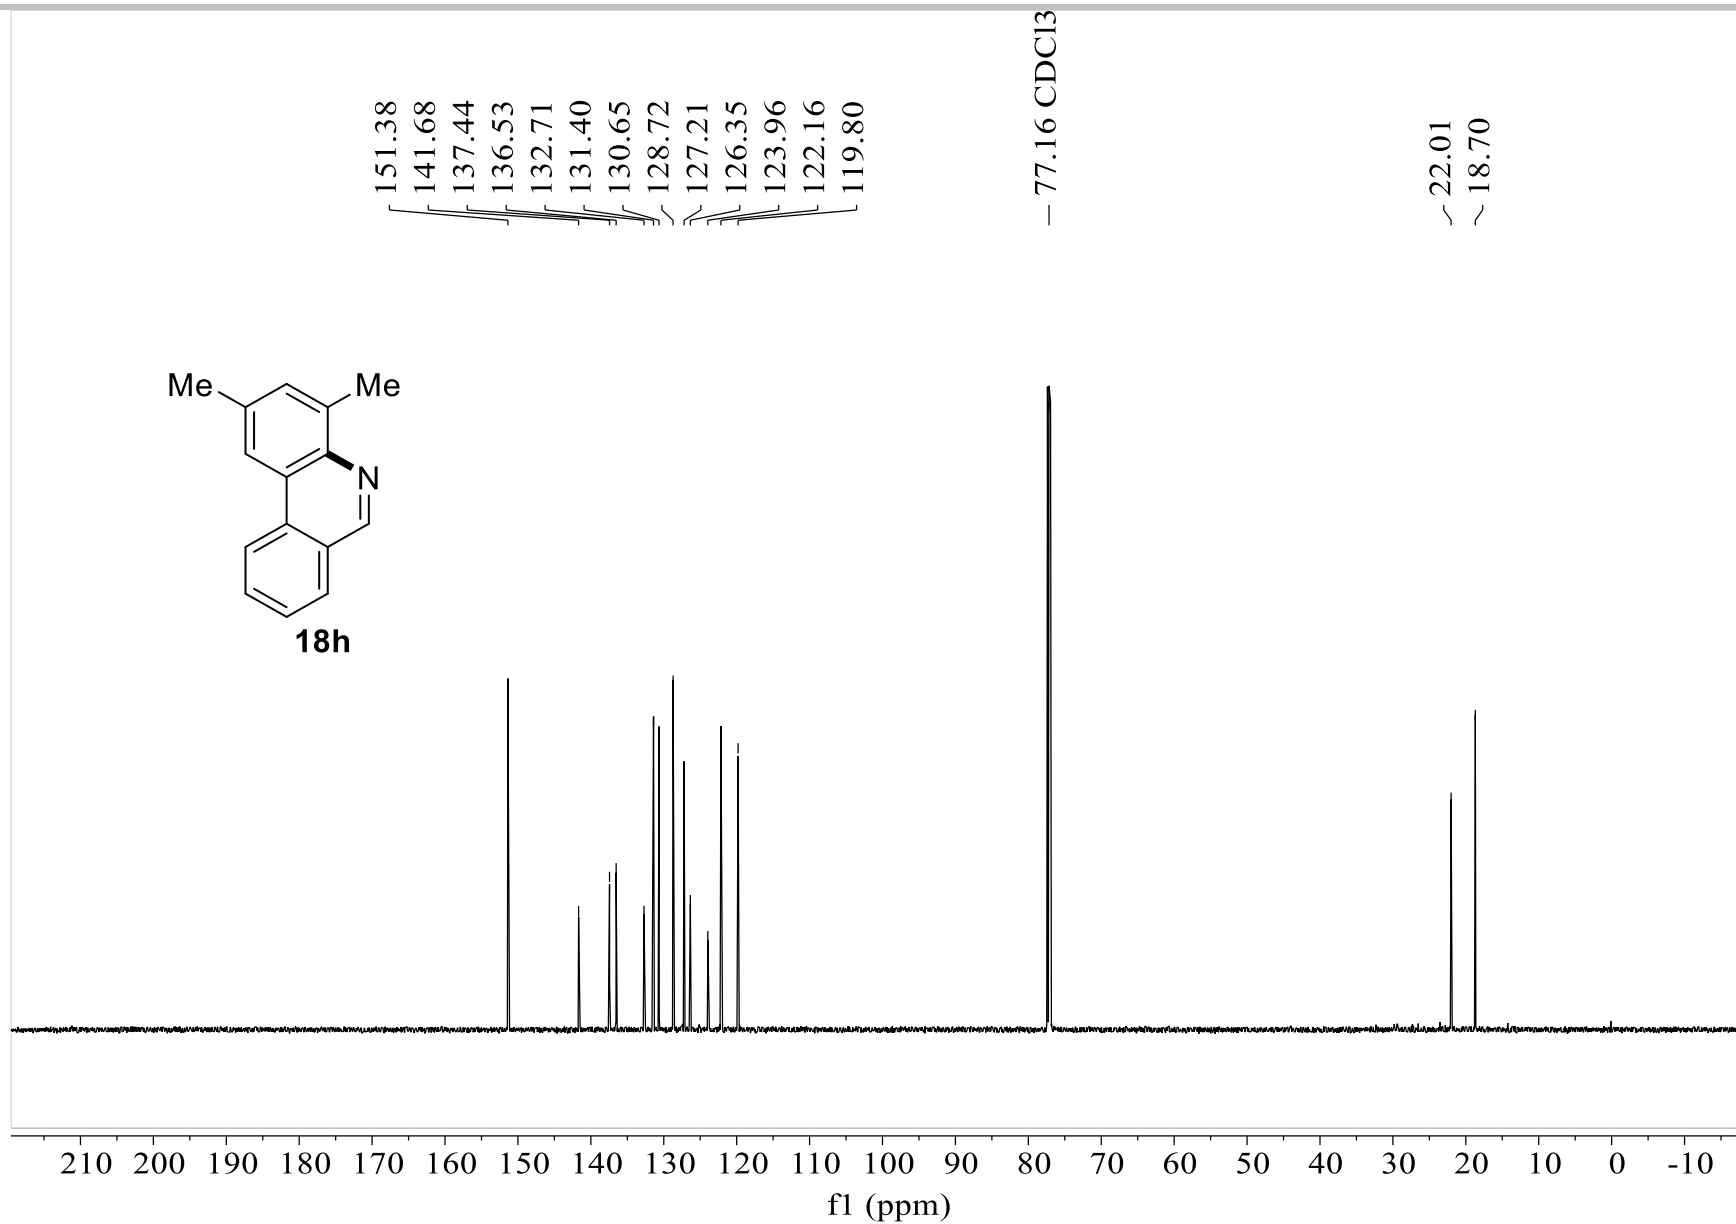

SUPPORTING INFORMATION

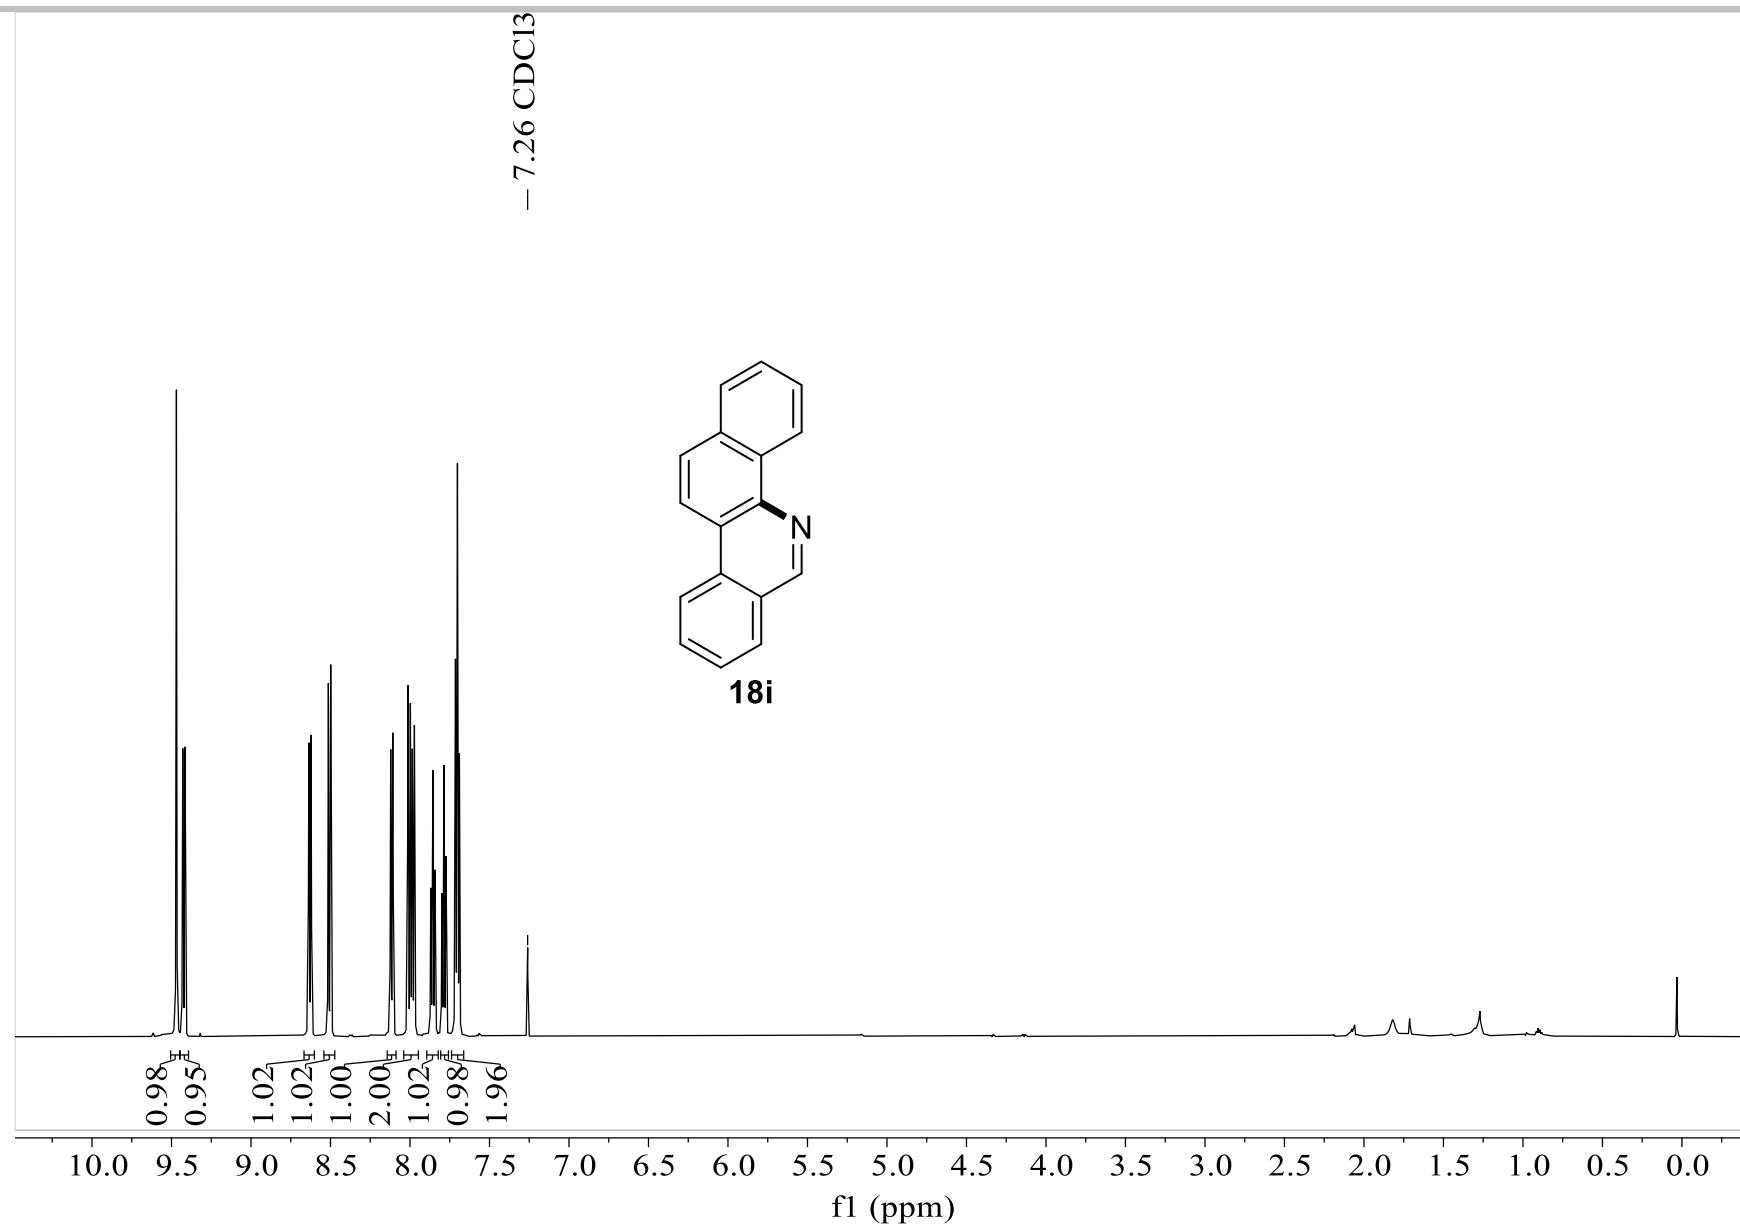

SUPPORTING INFORMATION

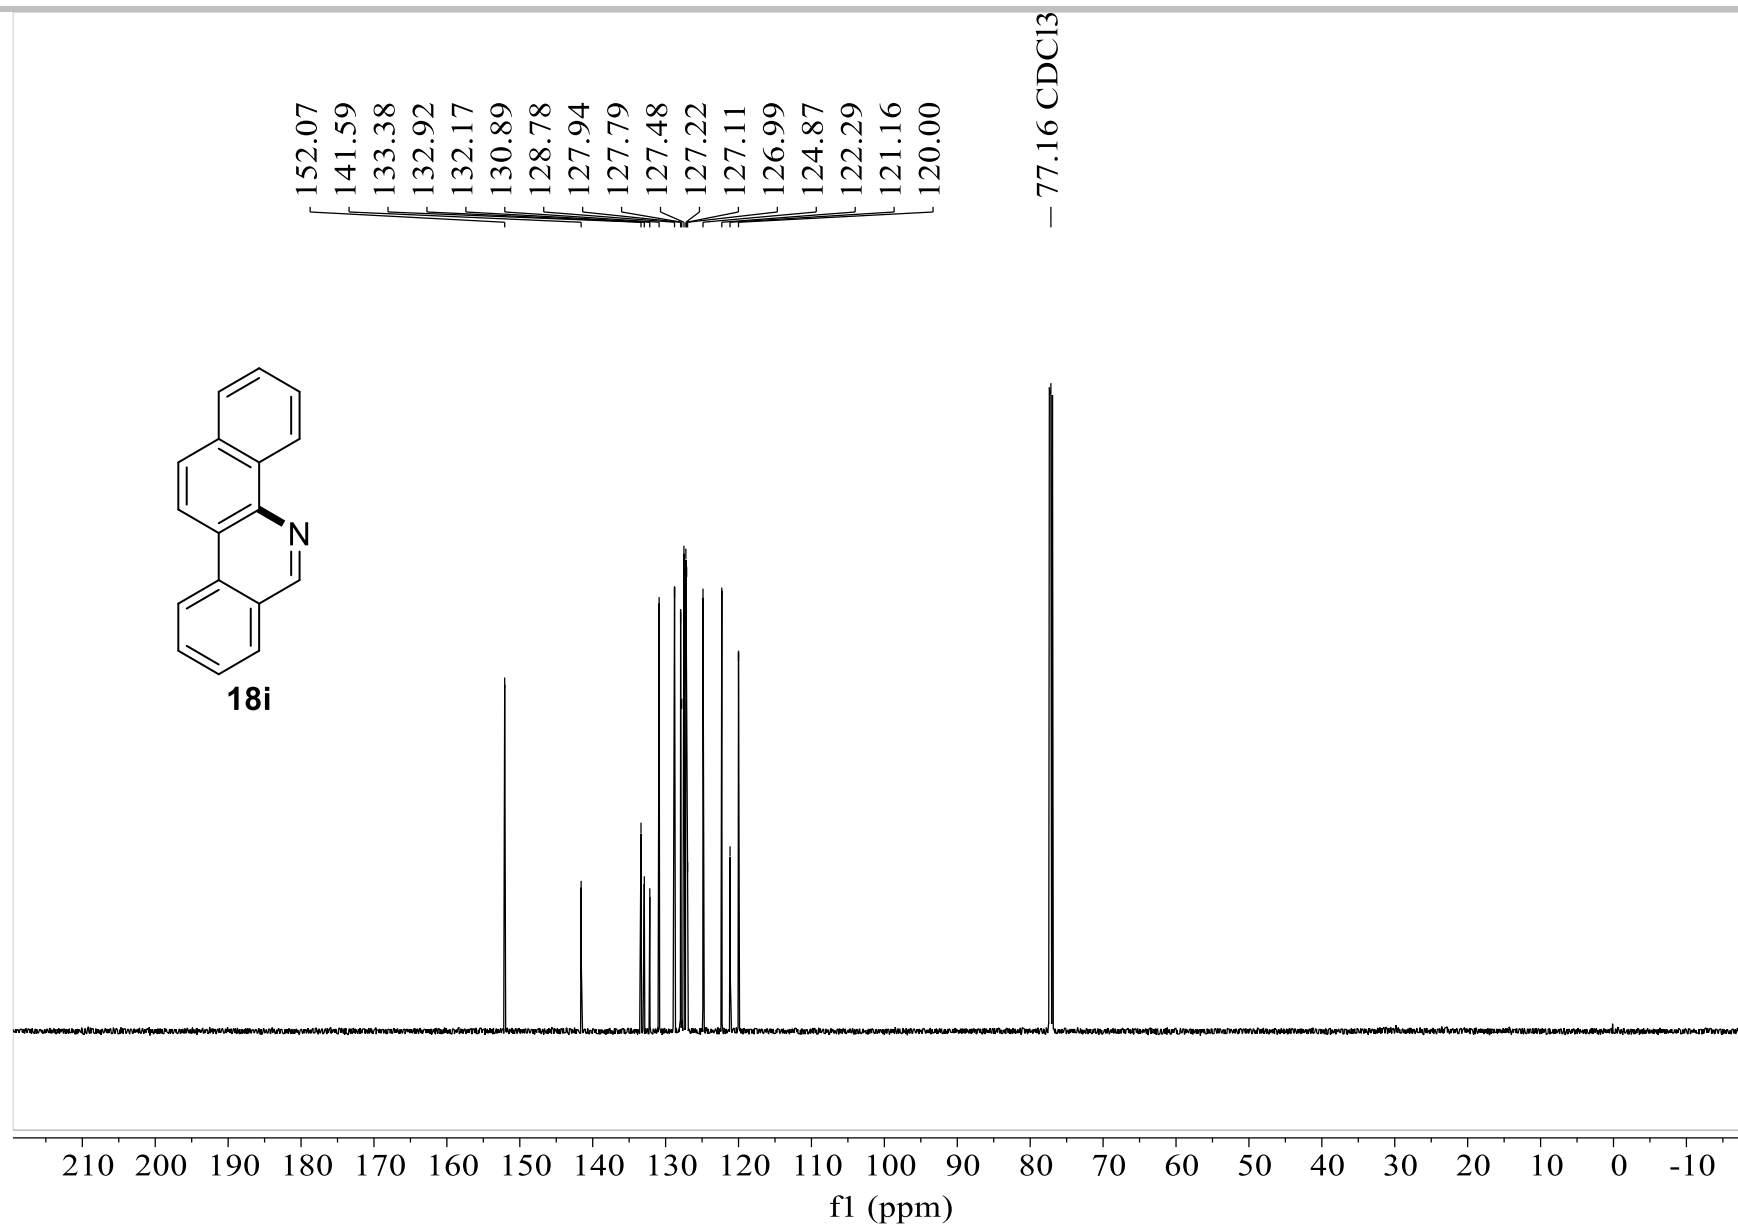

# SUPPORTING INFORMATION

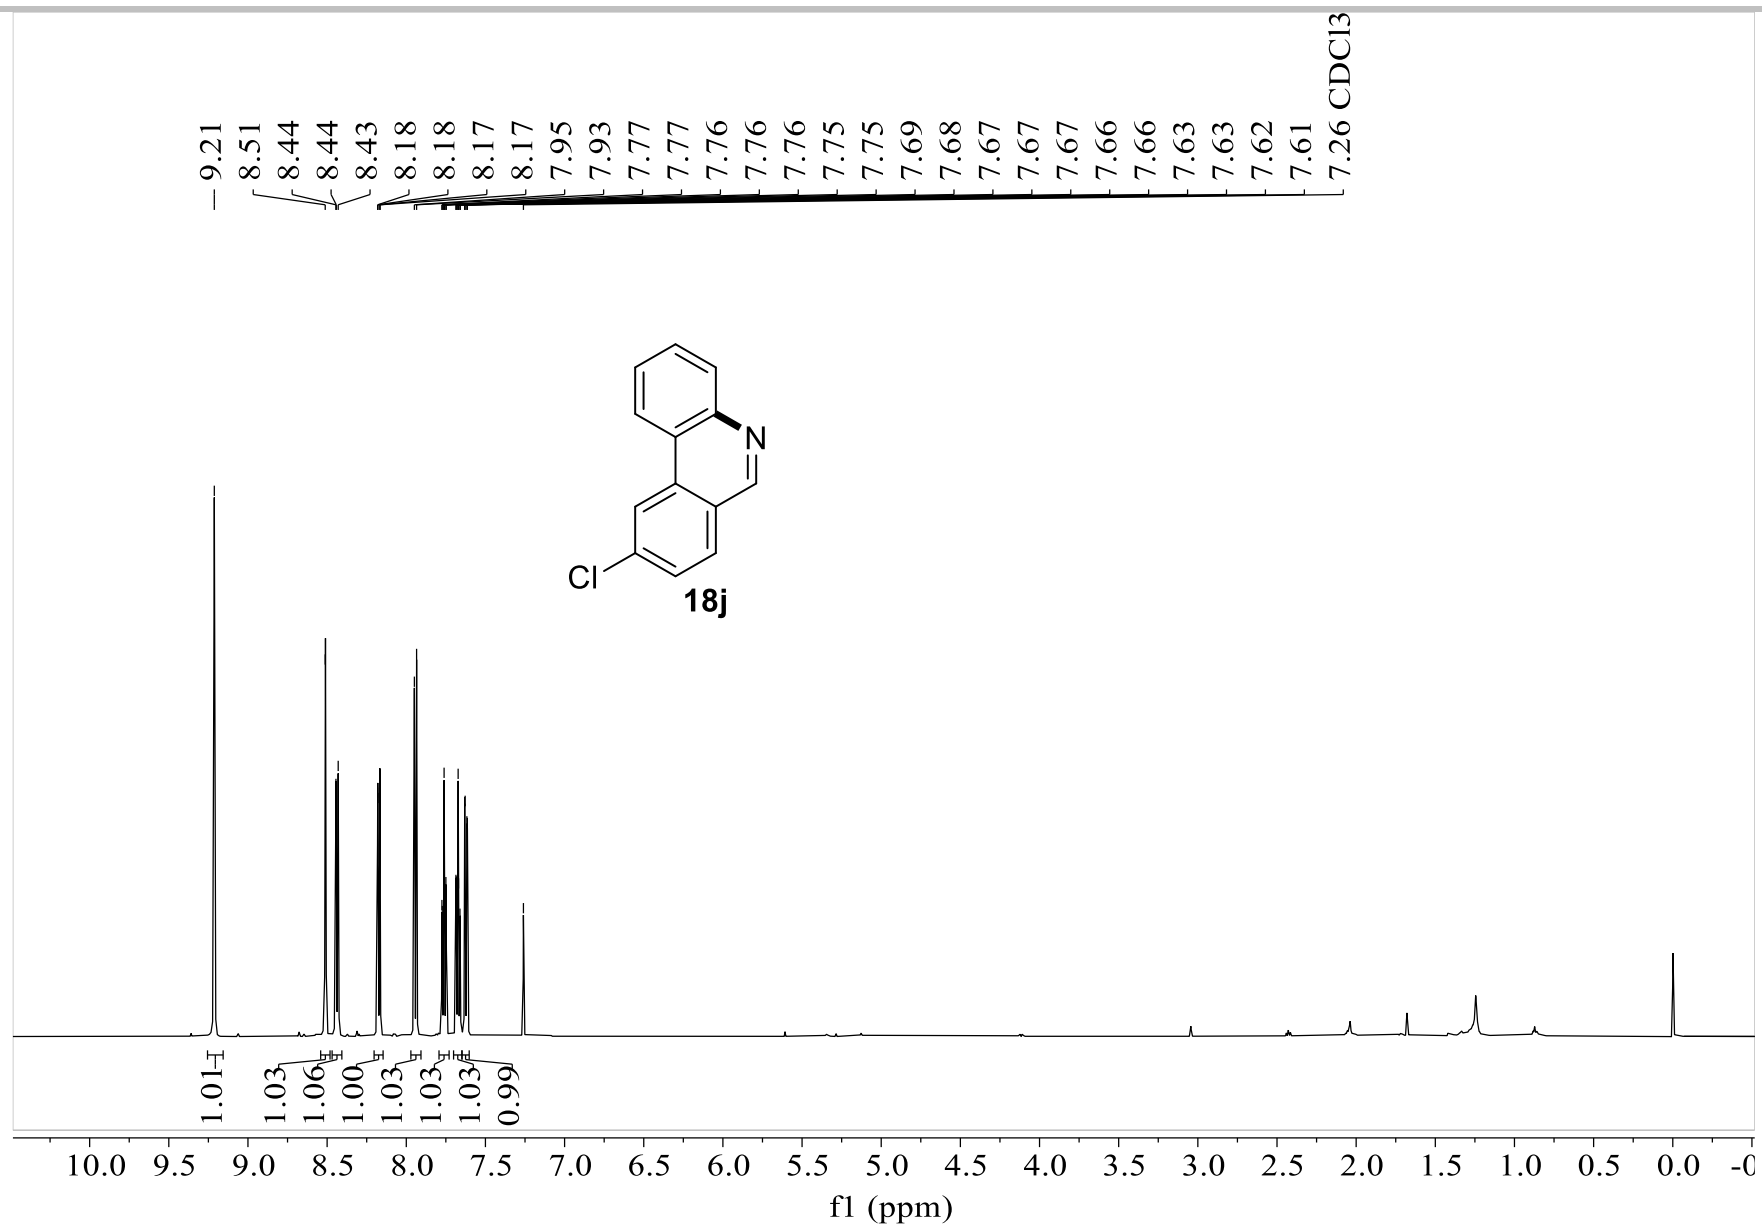

# SUPPORTING INFORMATION

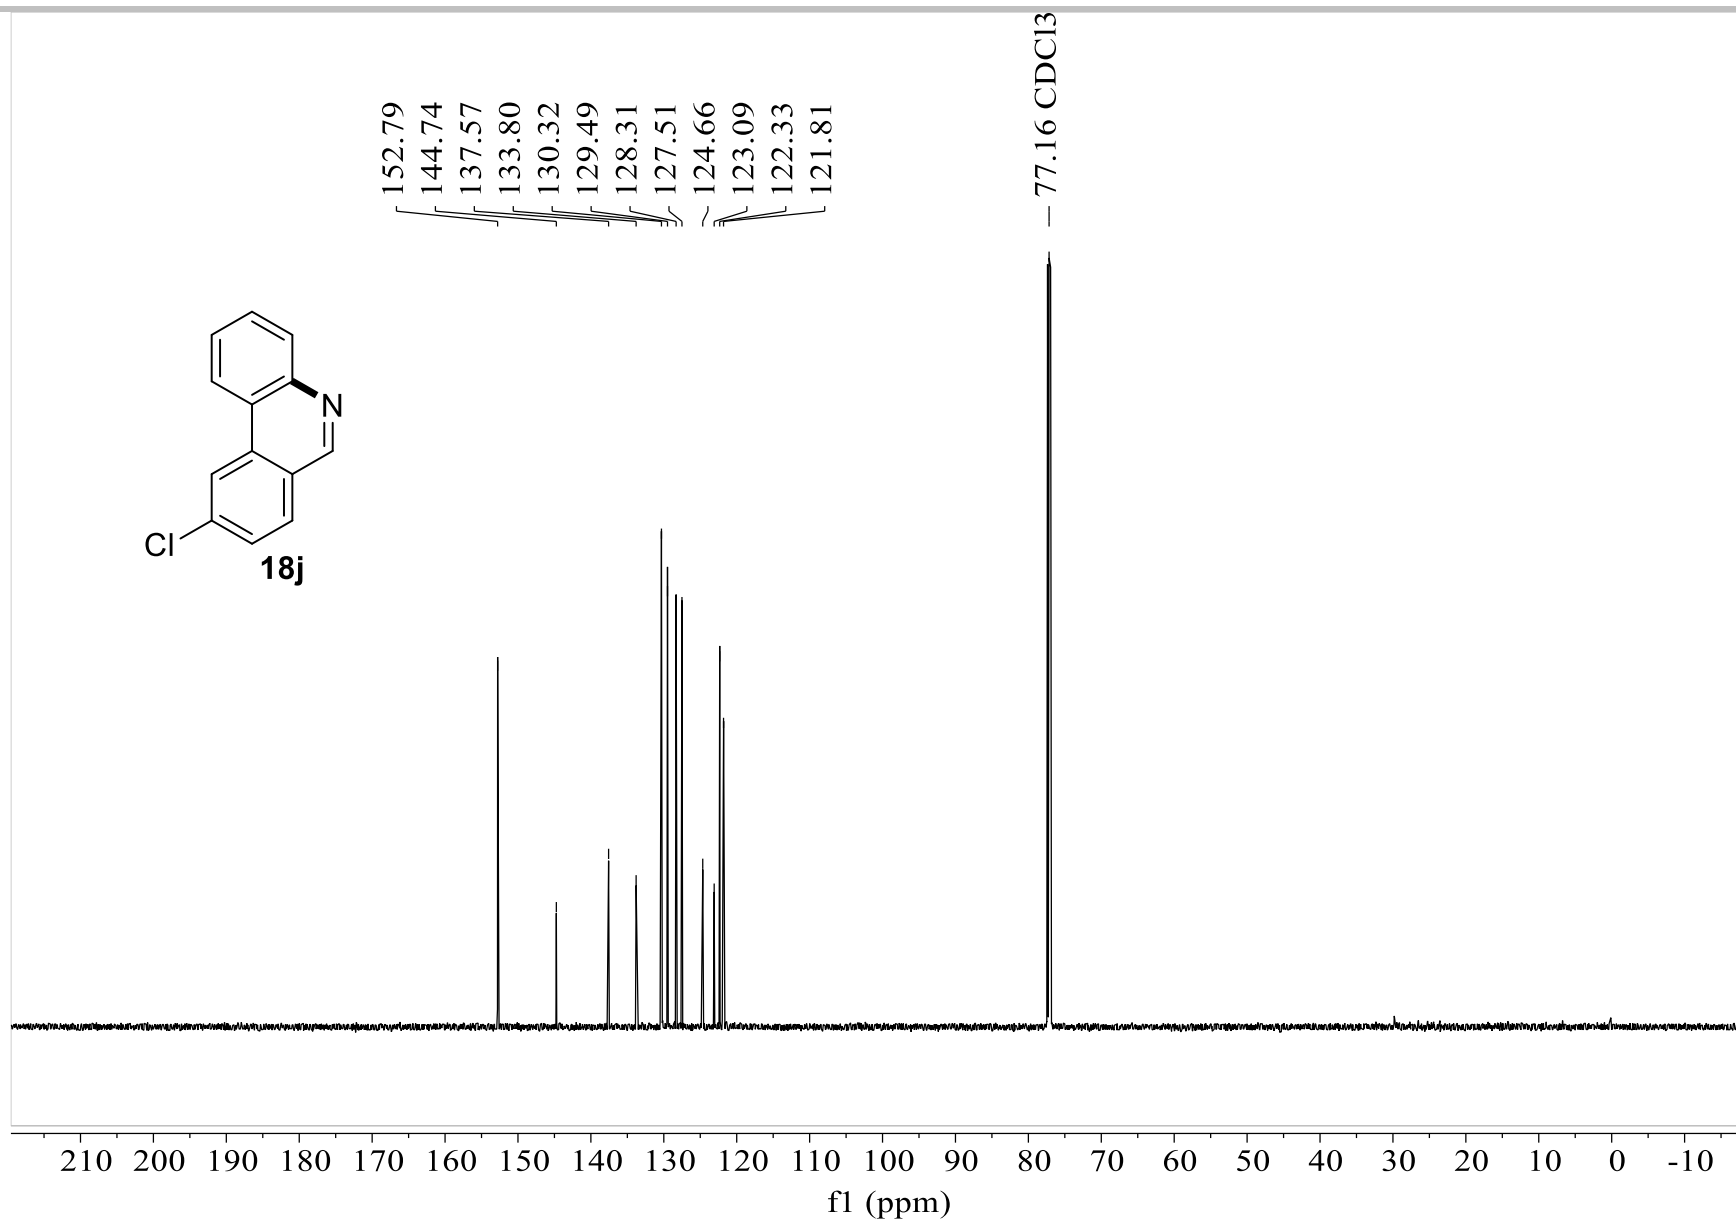

SUPPORTING INFORMATION

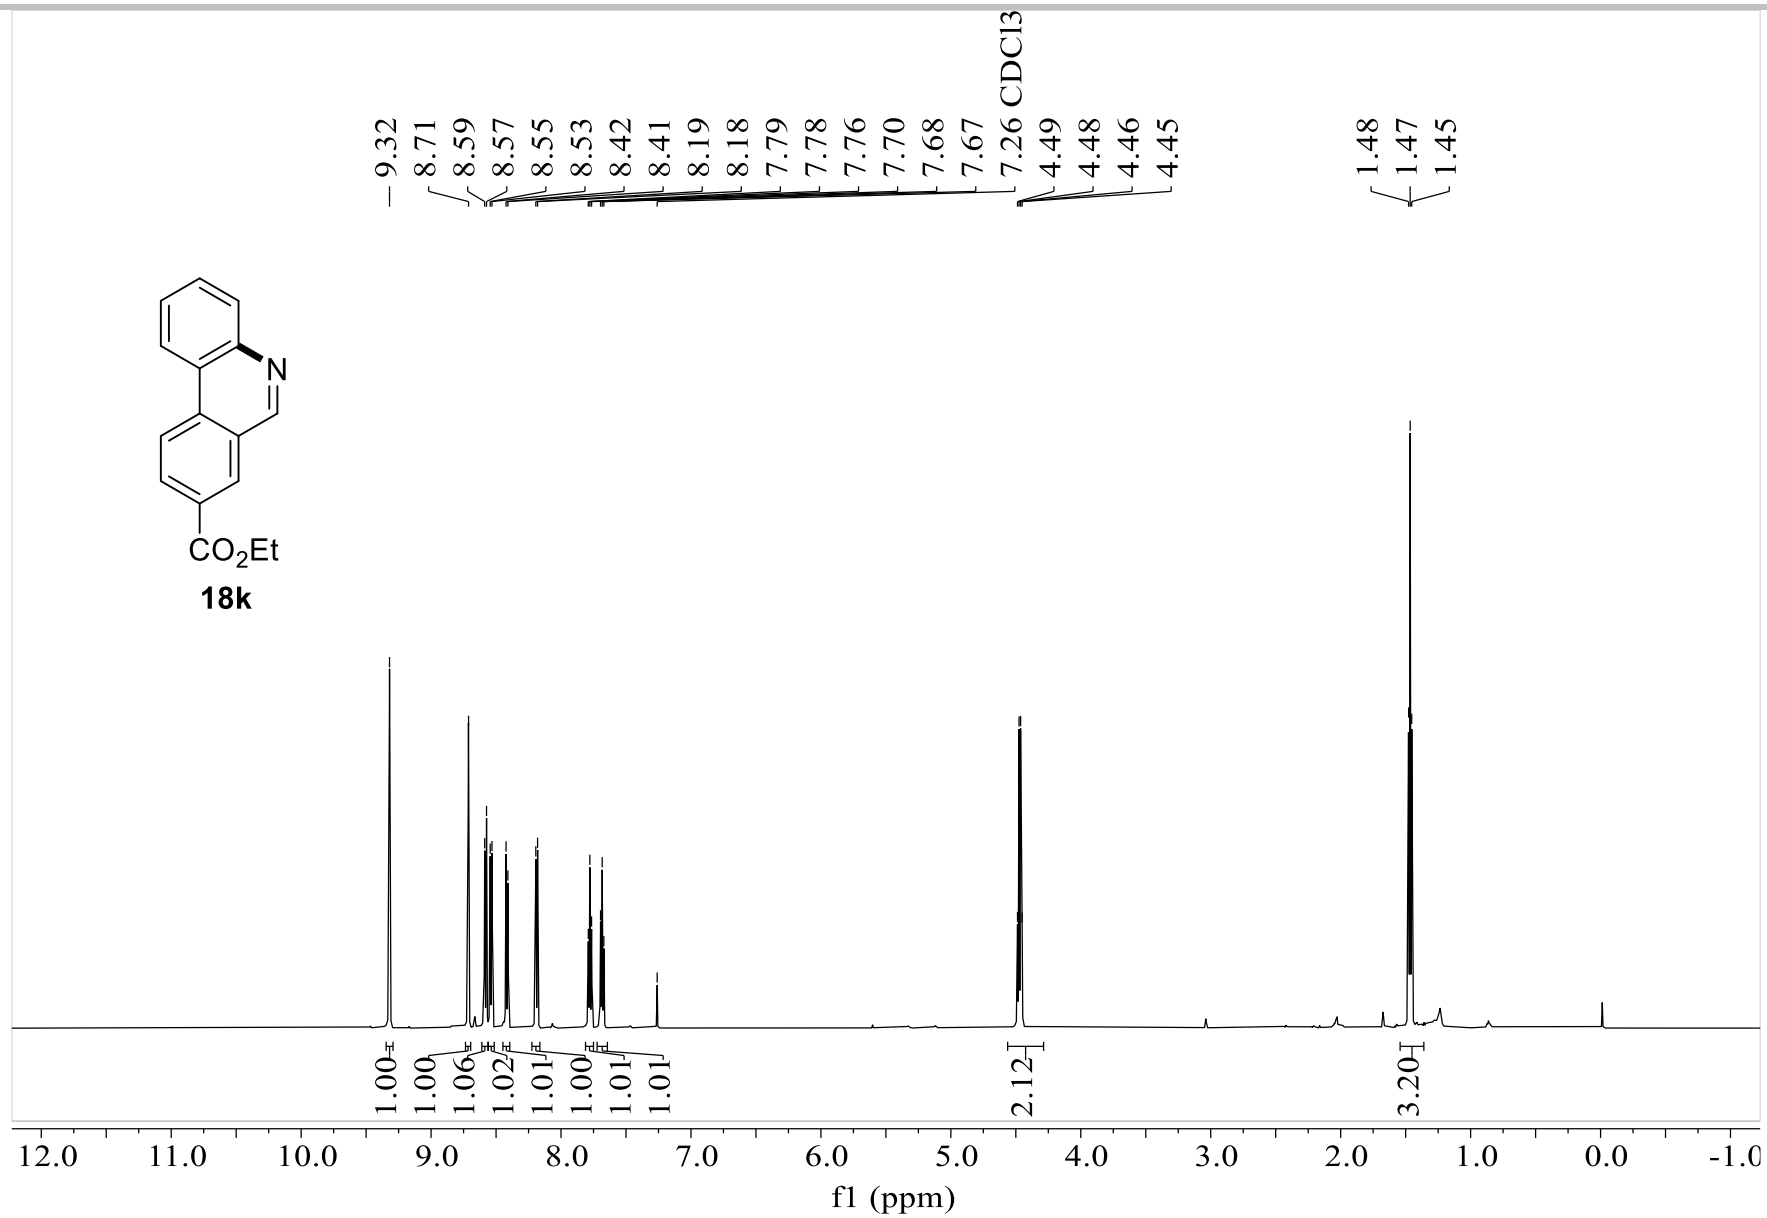

SUPPORTING INFORMATION

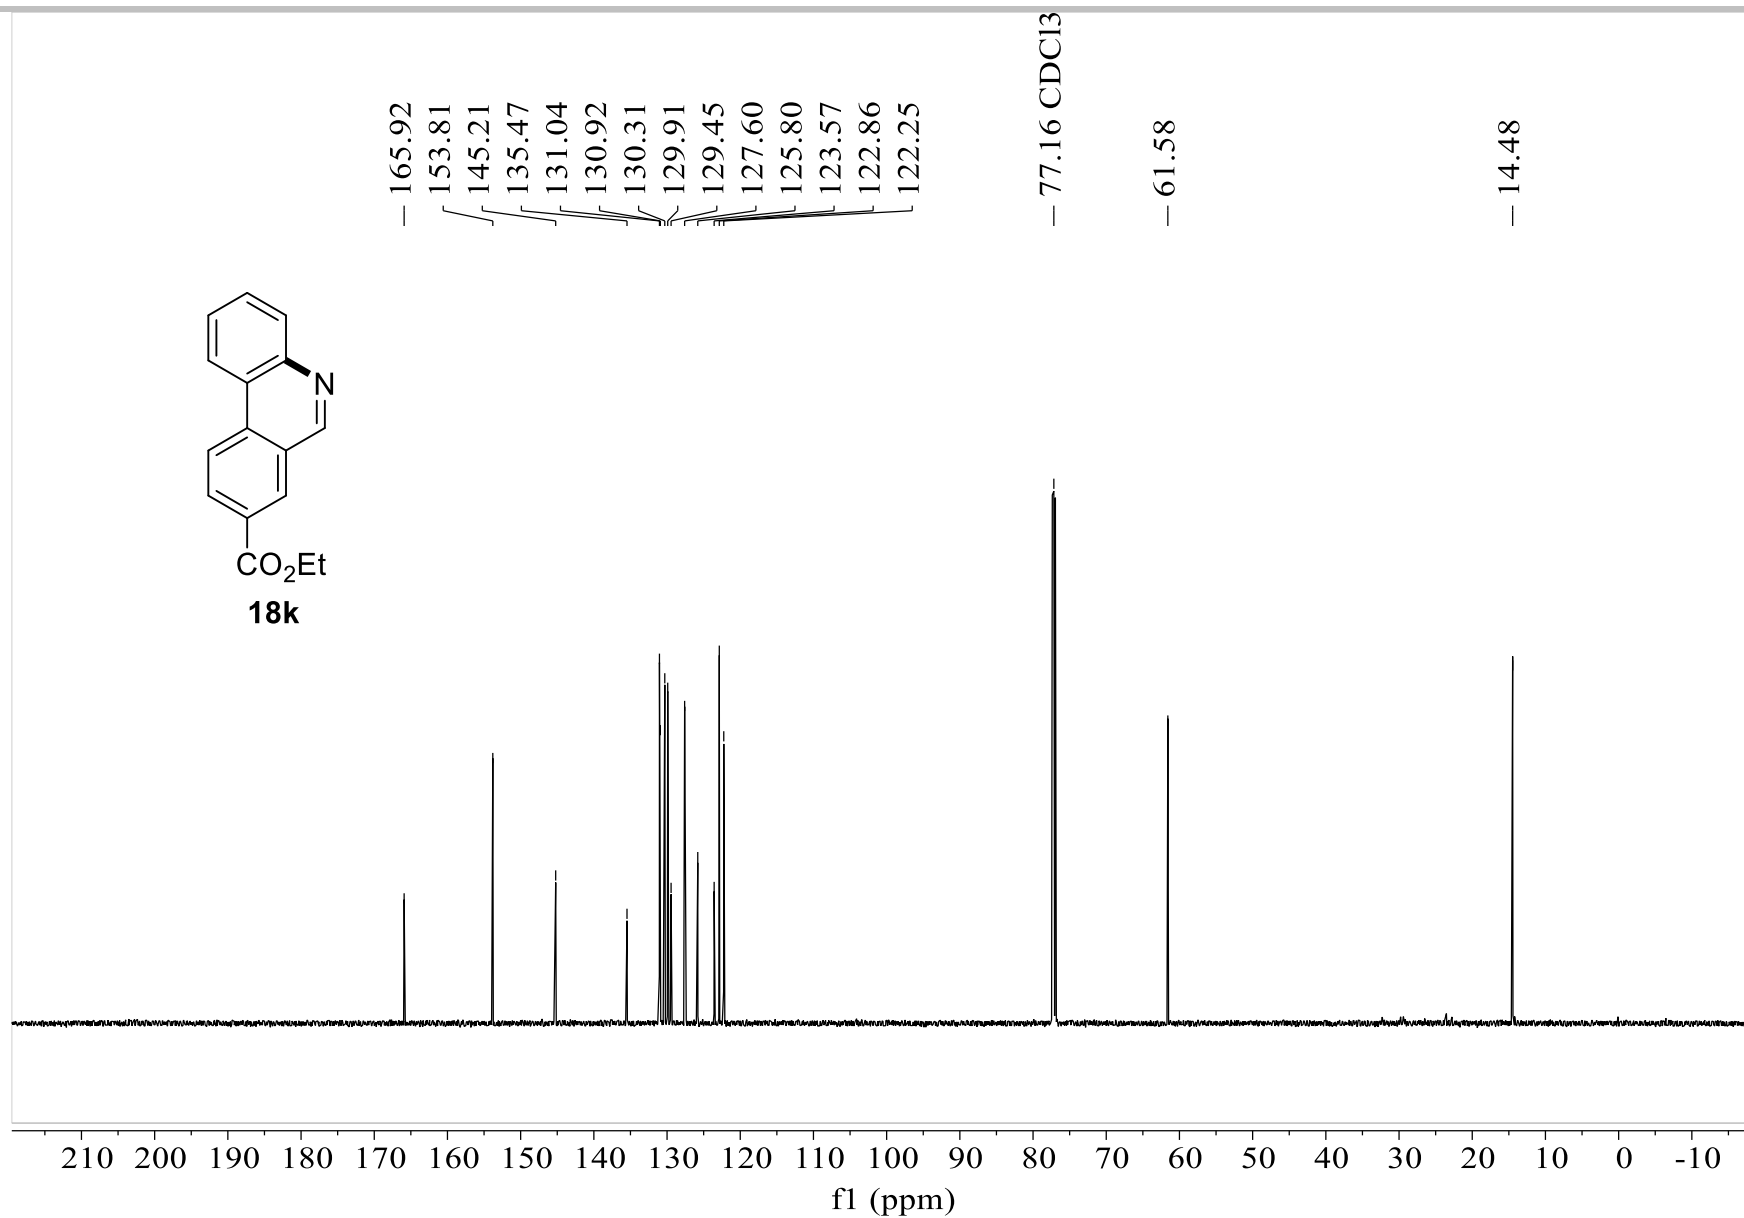

# SUPPORTING INFORMATION

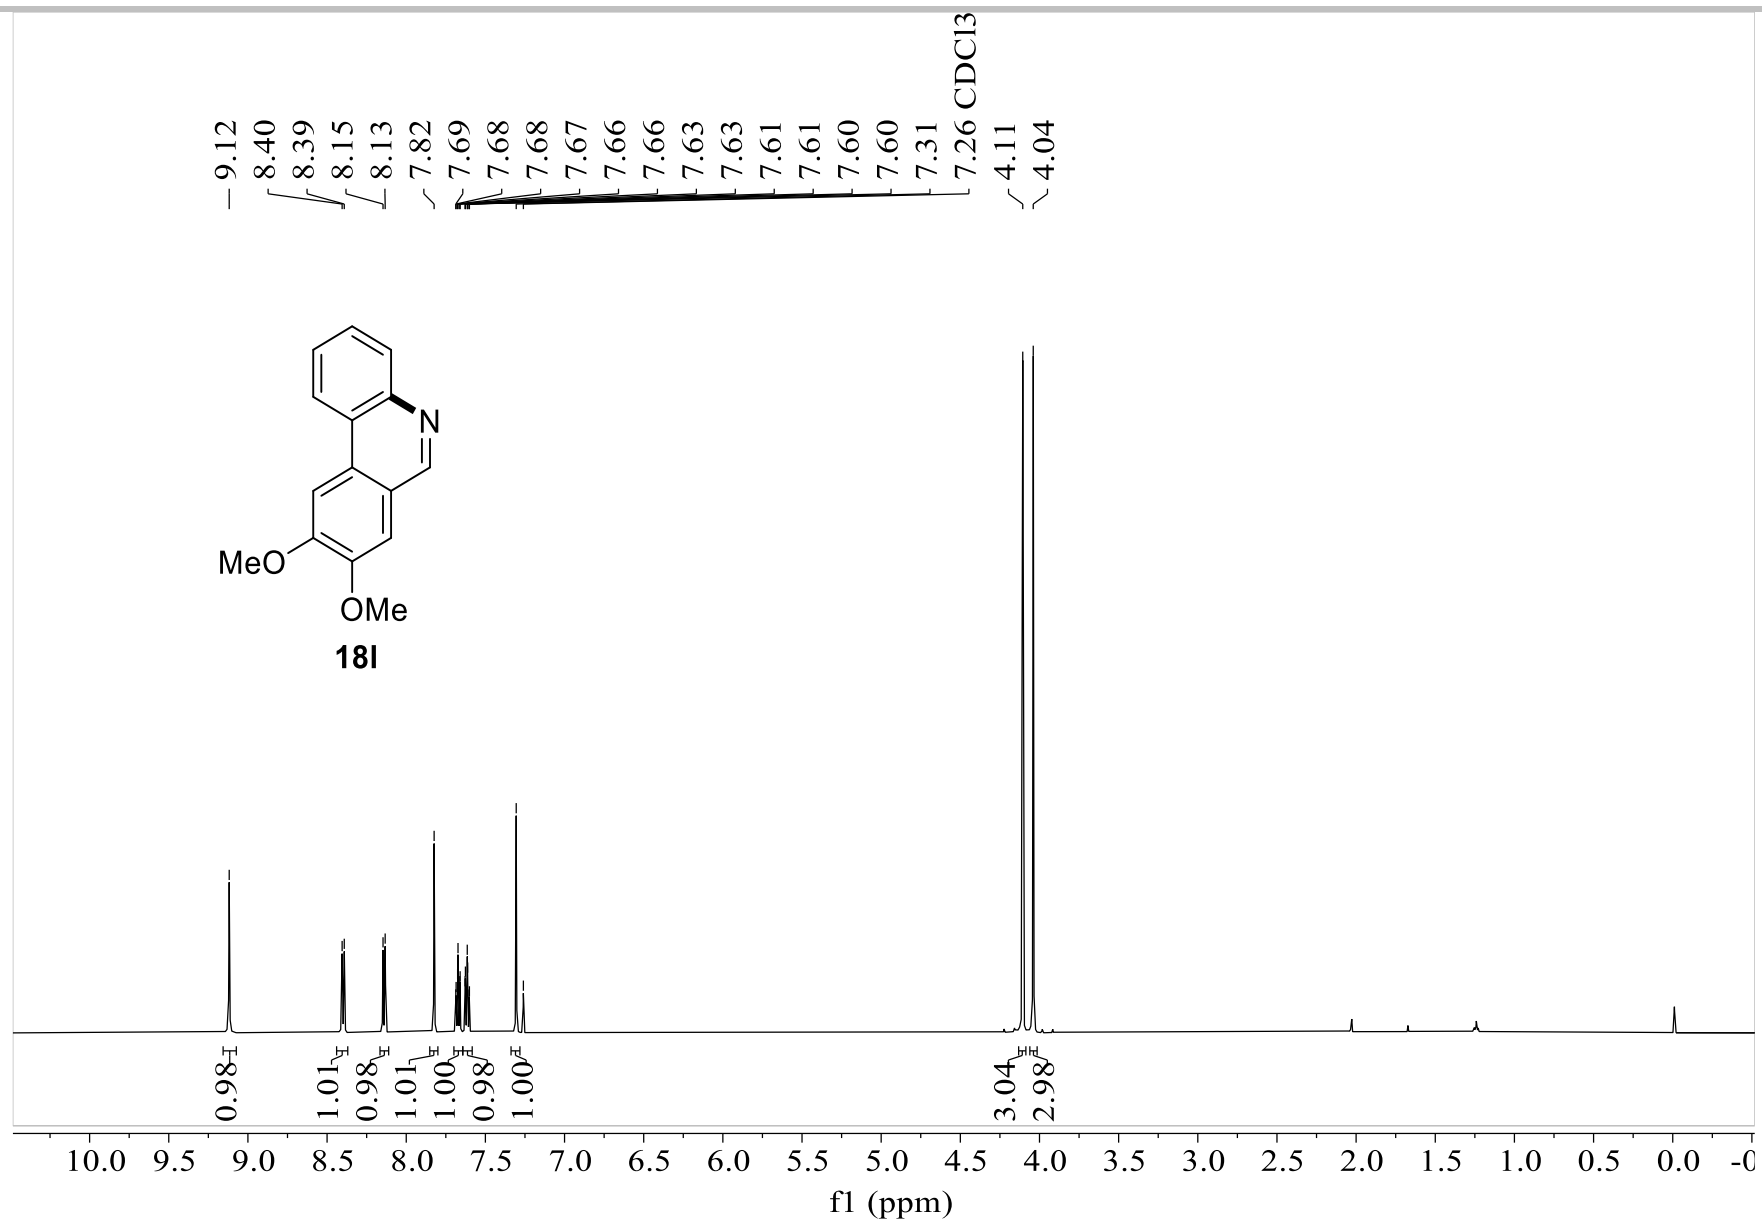



SUPPORTING INFORMATION

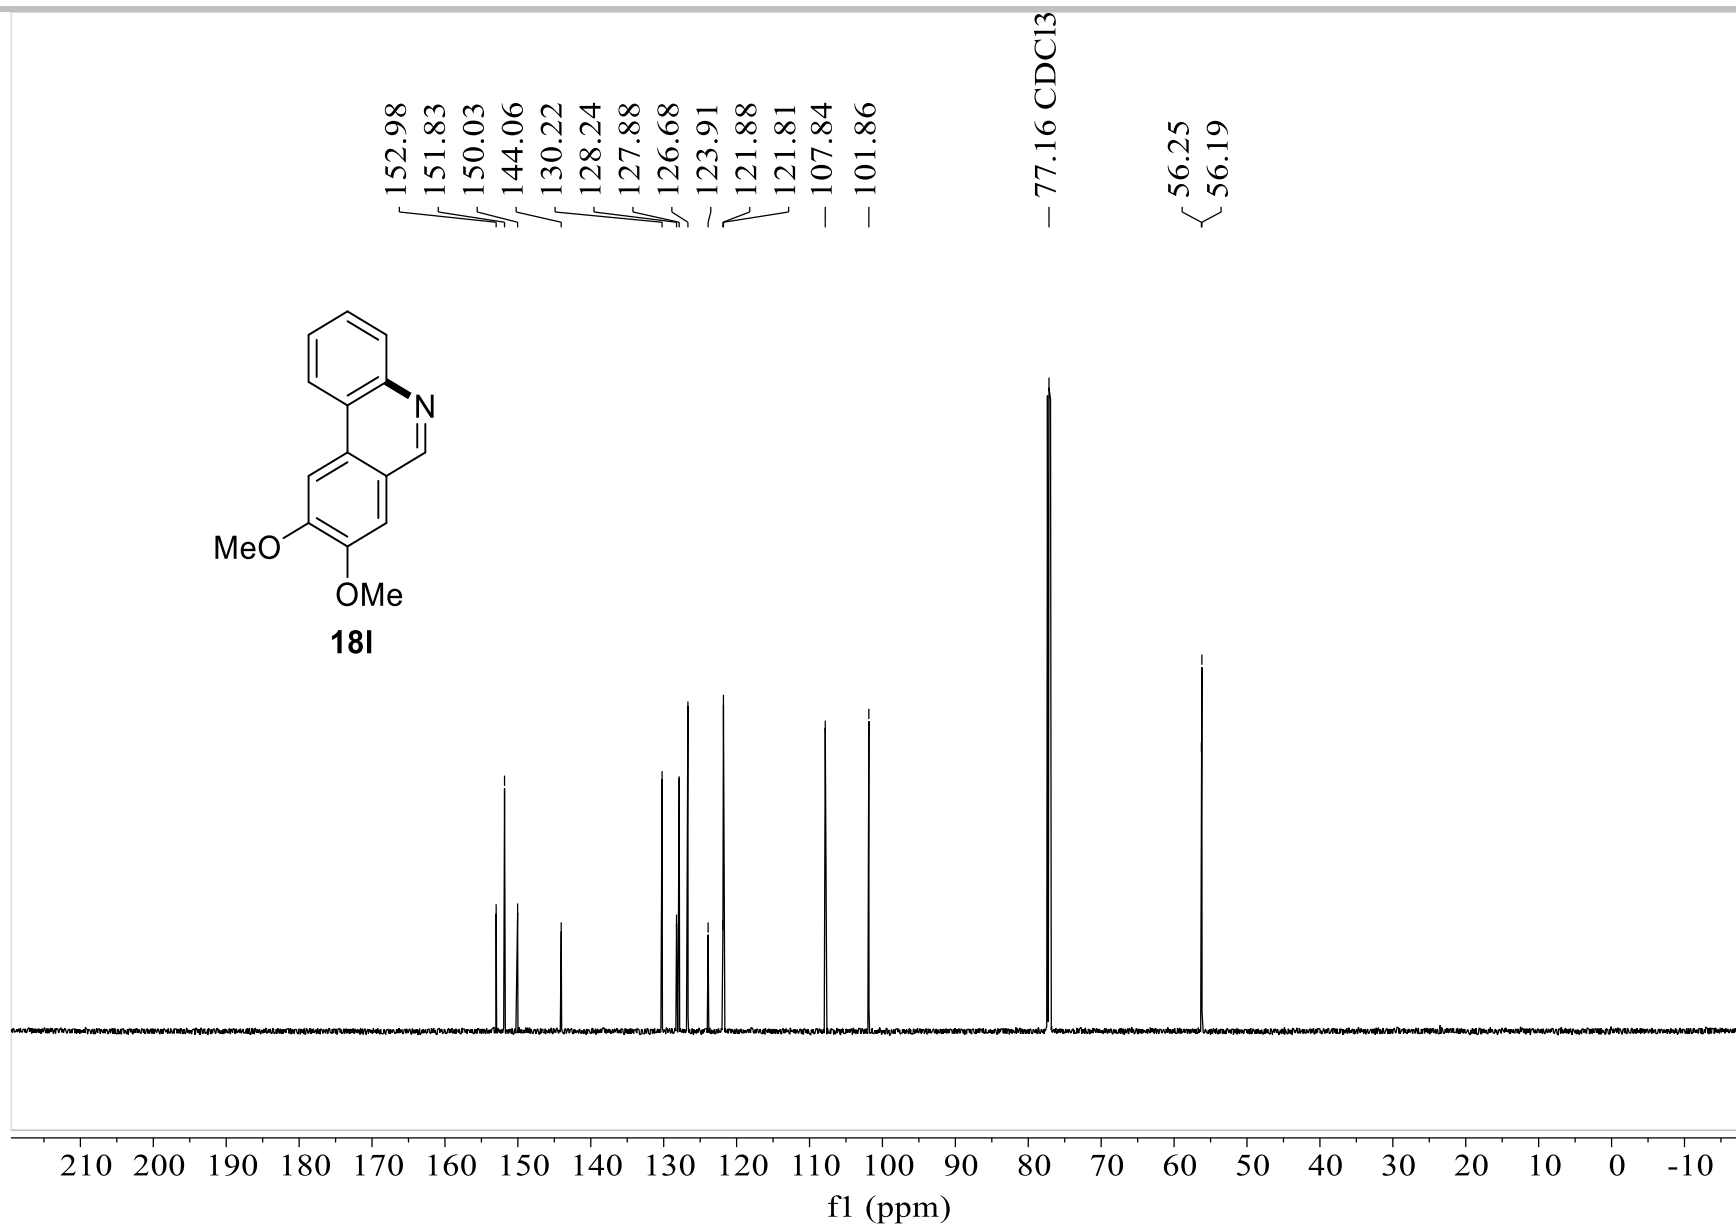

SUPPORTING INFORMATION

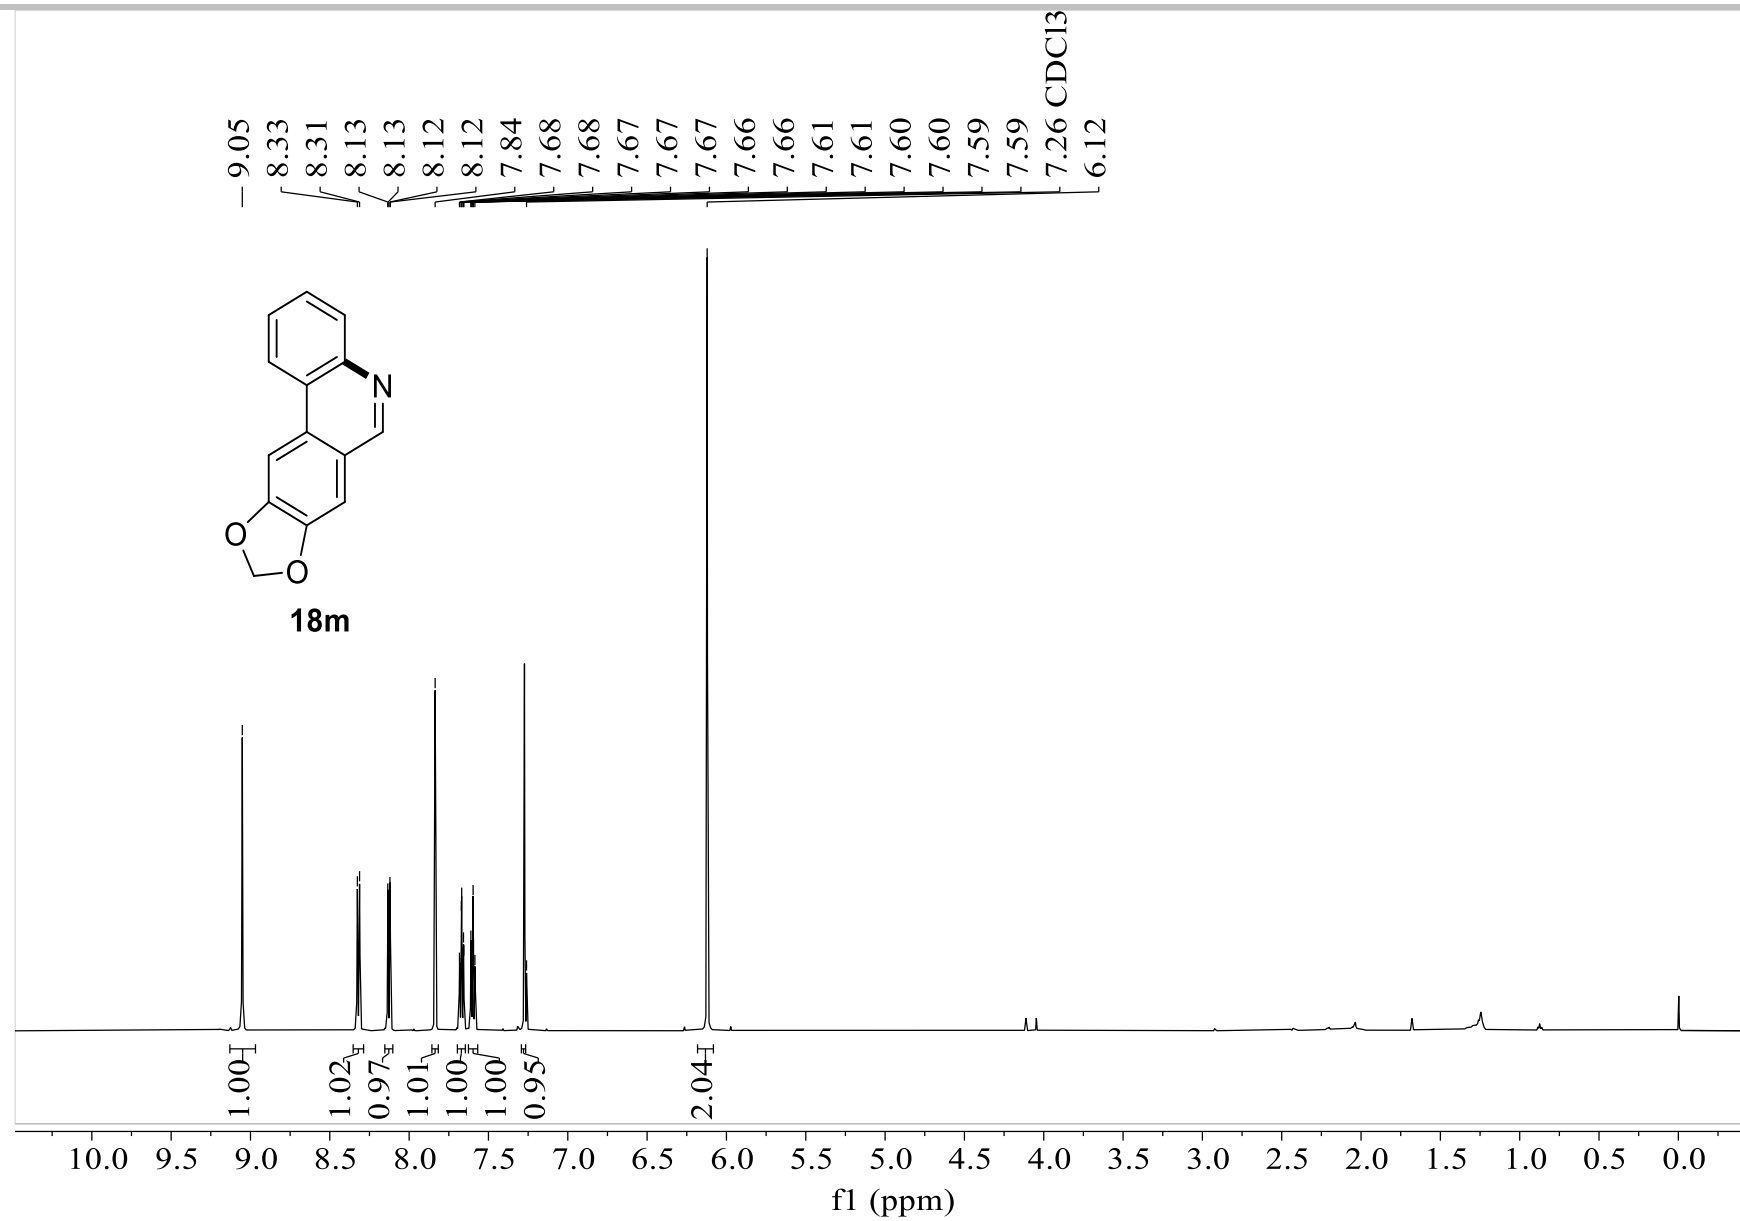

SUPPORTING INFORMATION

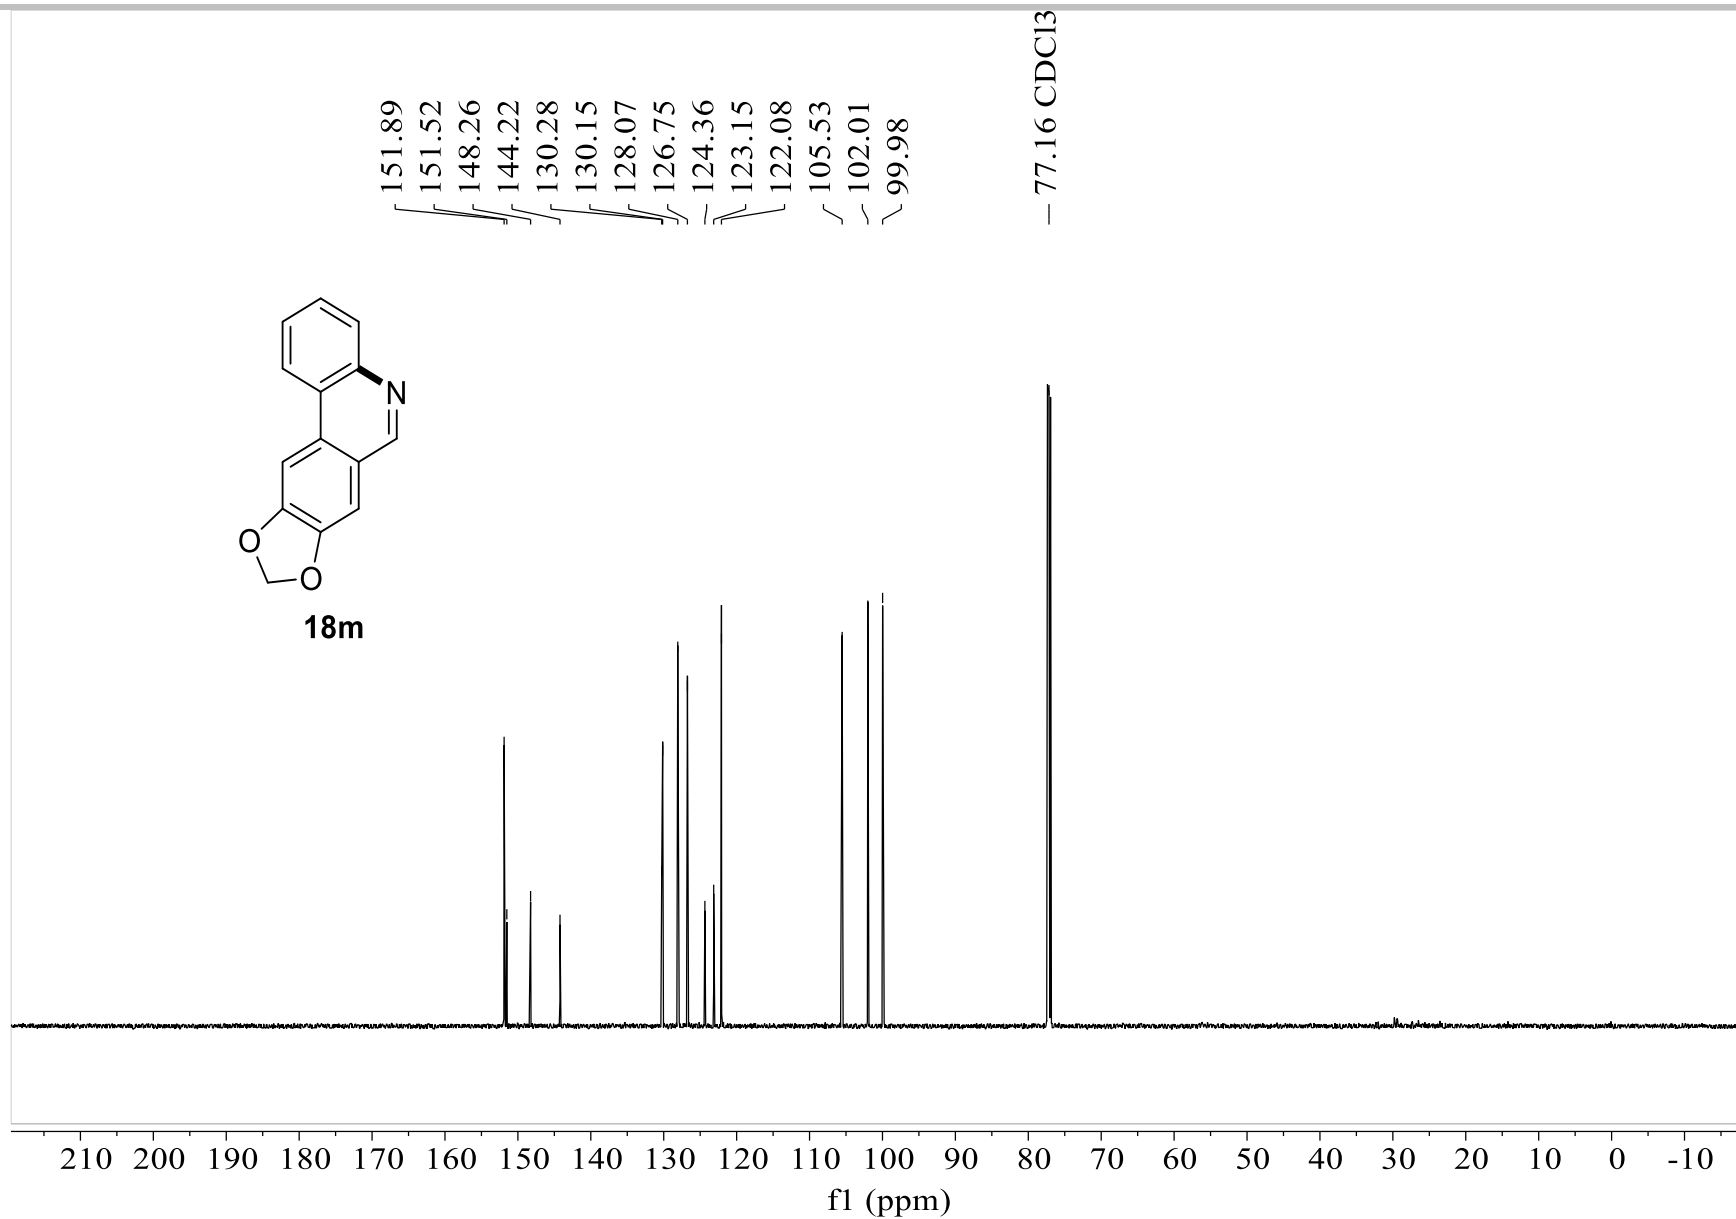

SUPPORTING INFORMATION

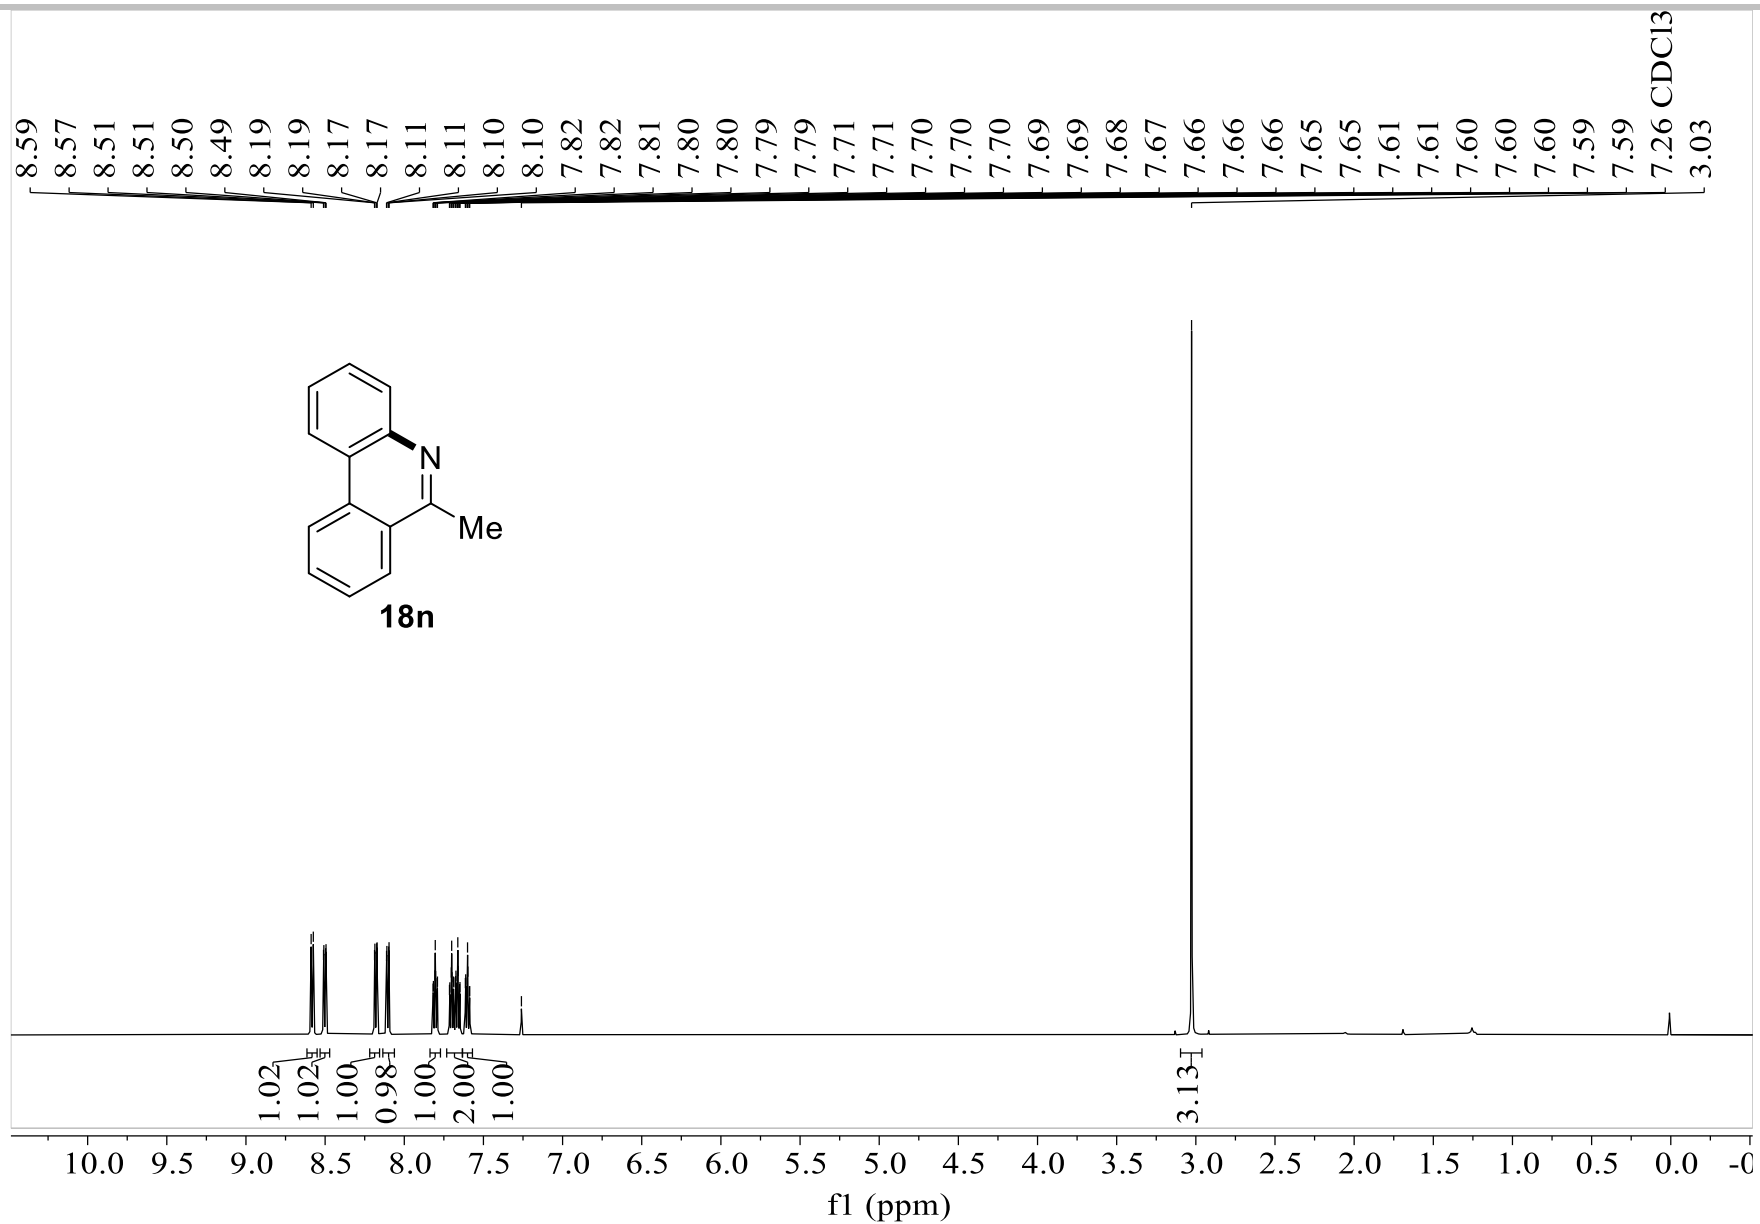

SUPPORTING INFORMATION

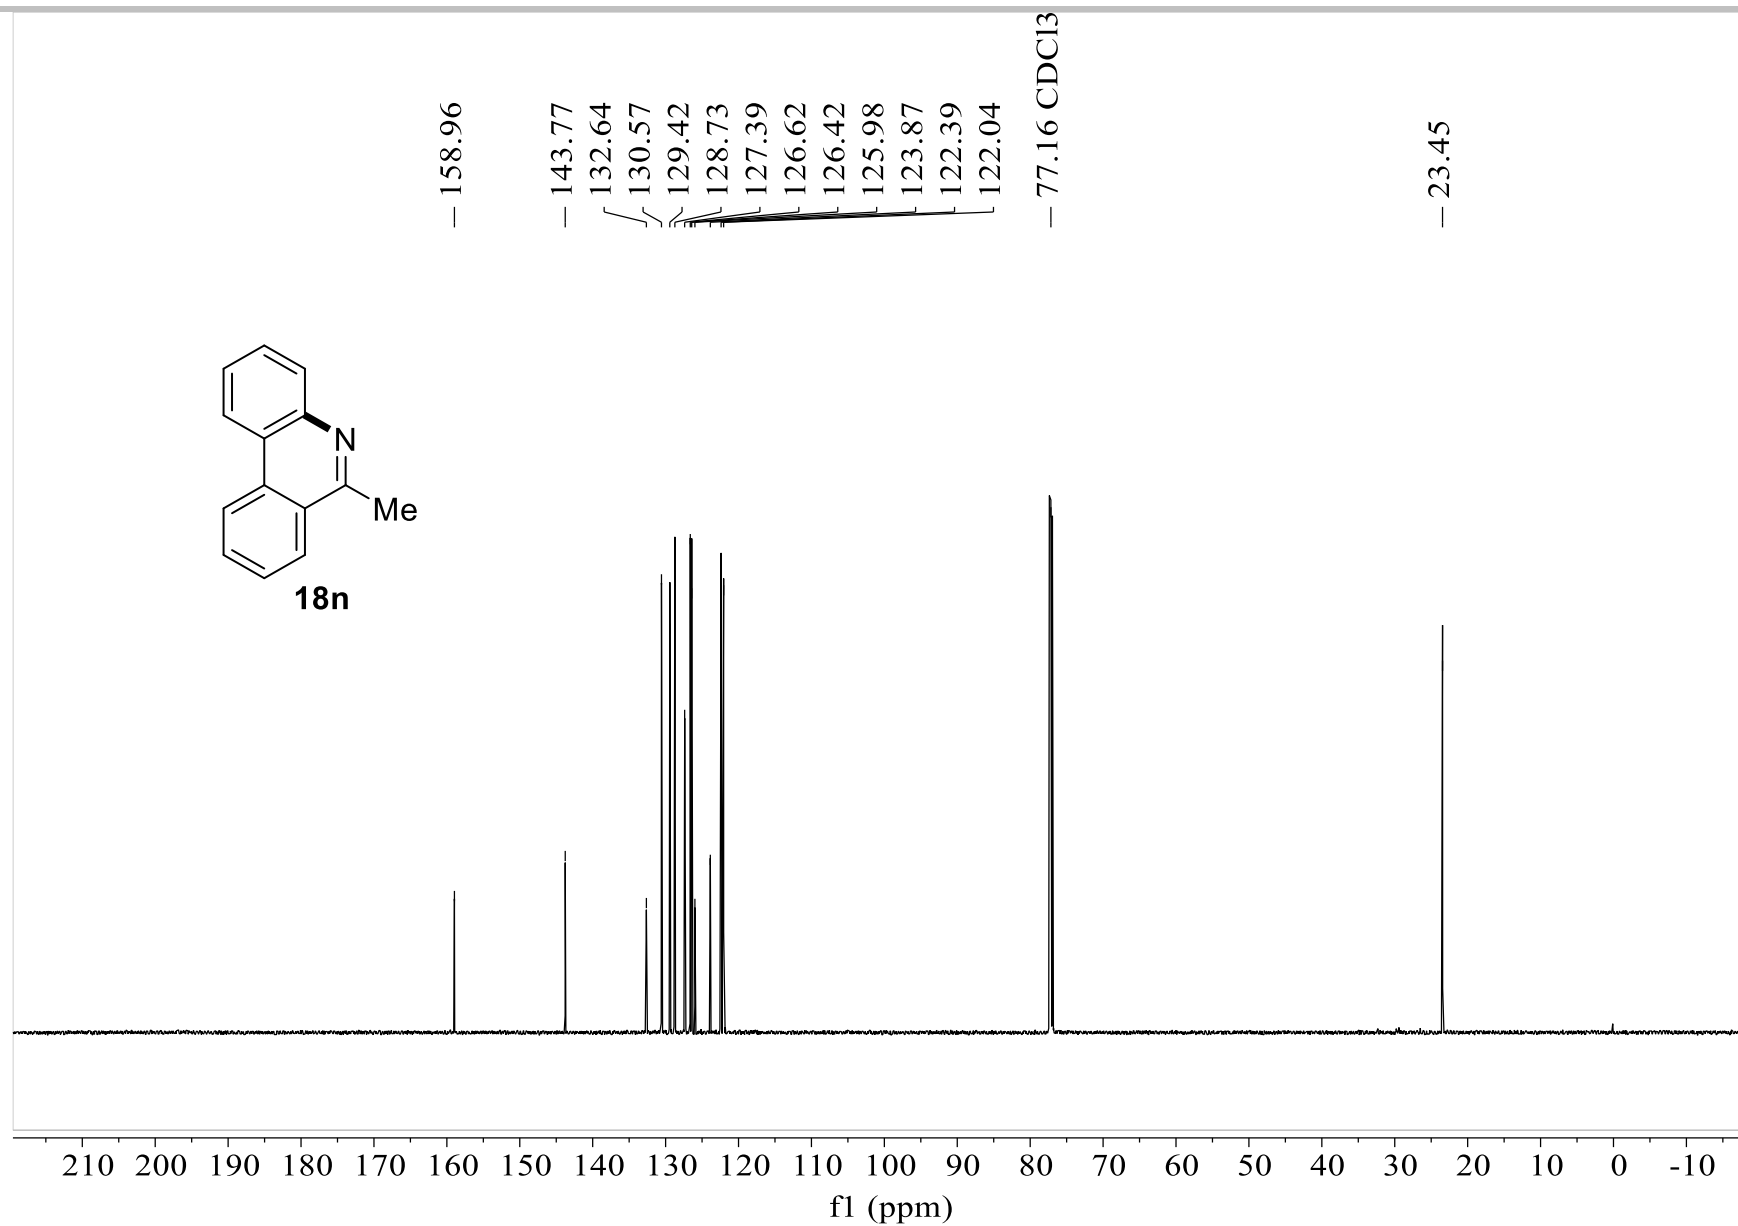

SUPPORTING INFORMATION

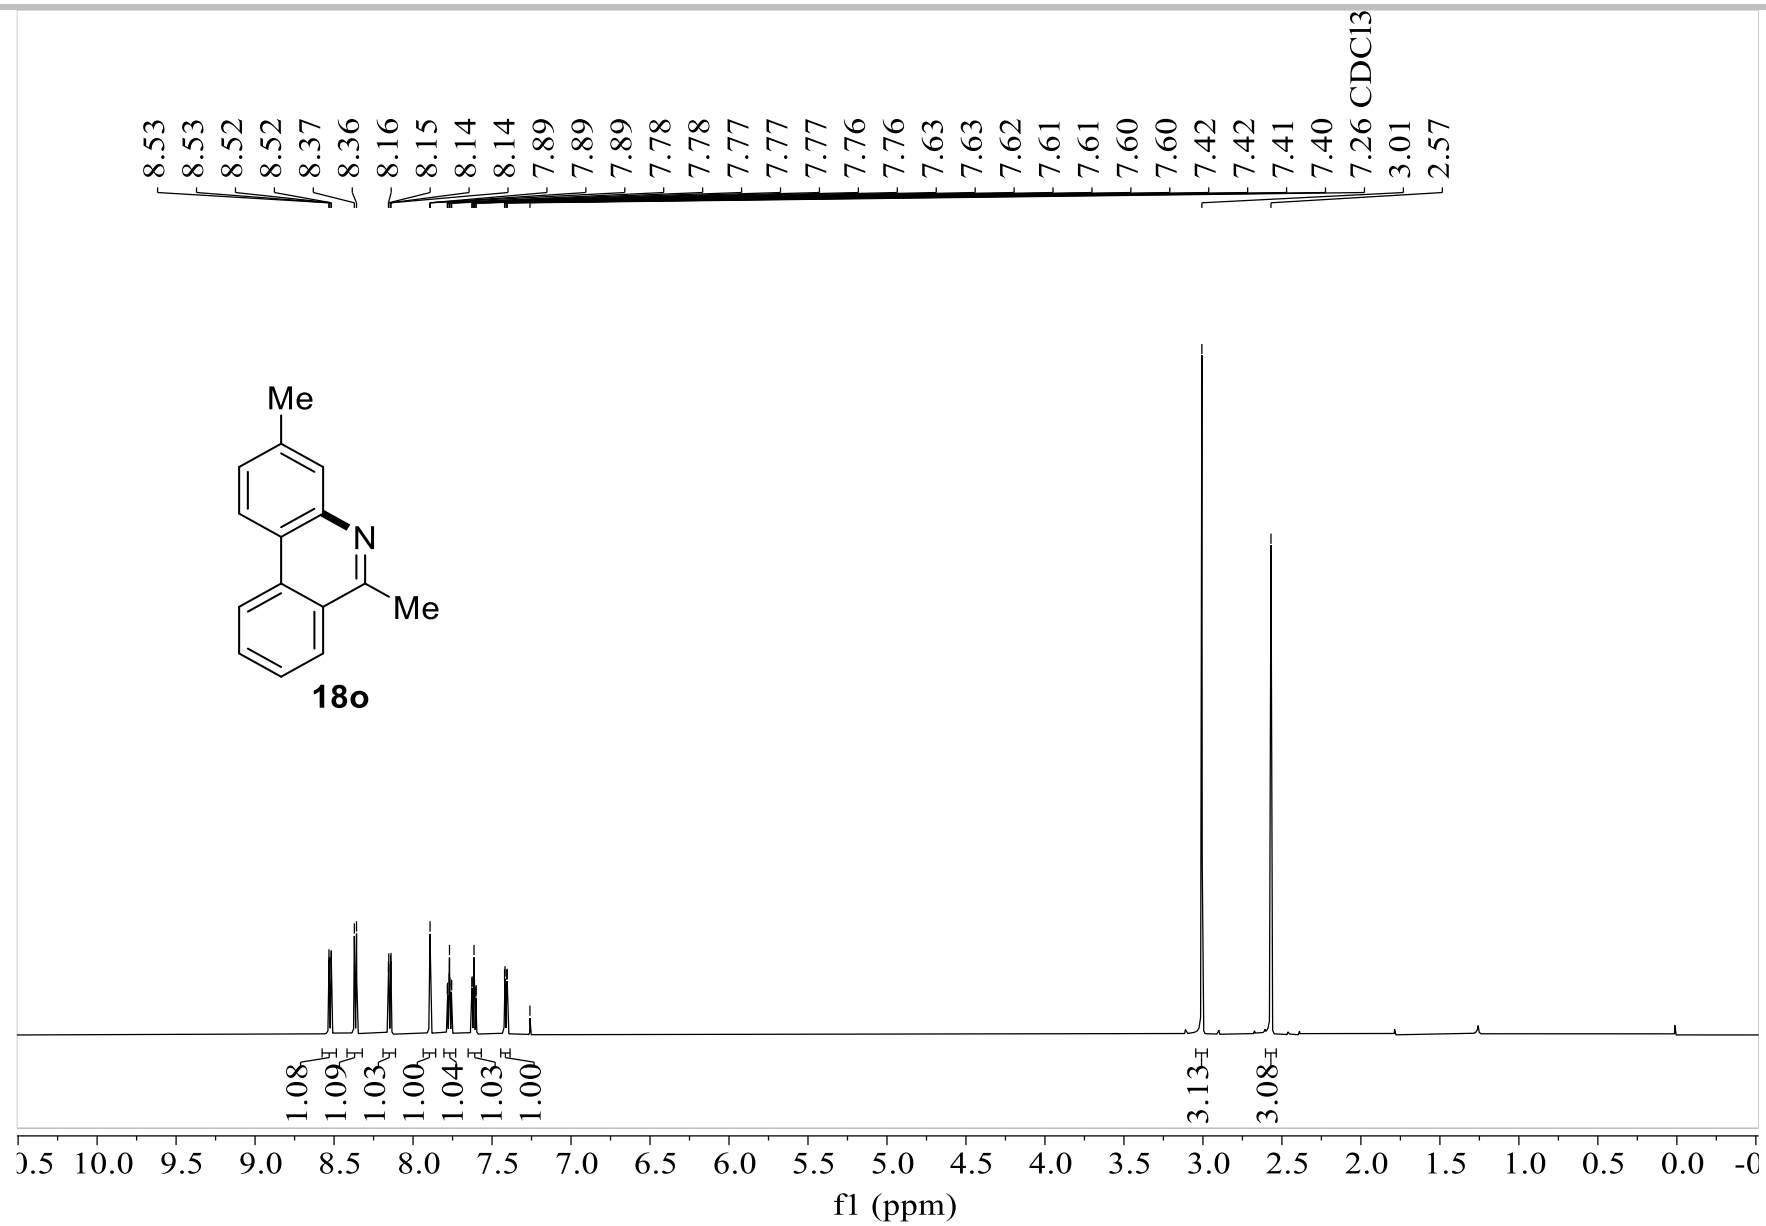

SUPPORTING INFORMATION

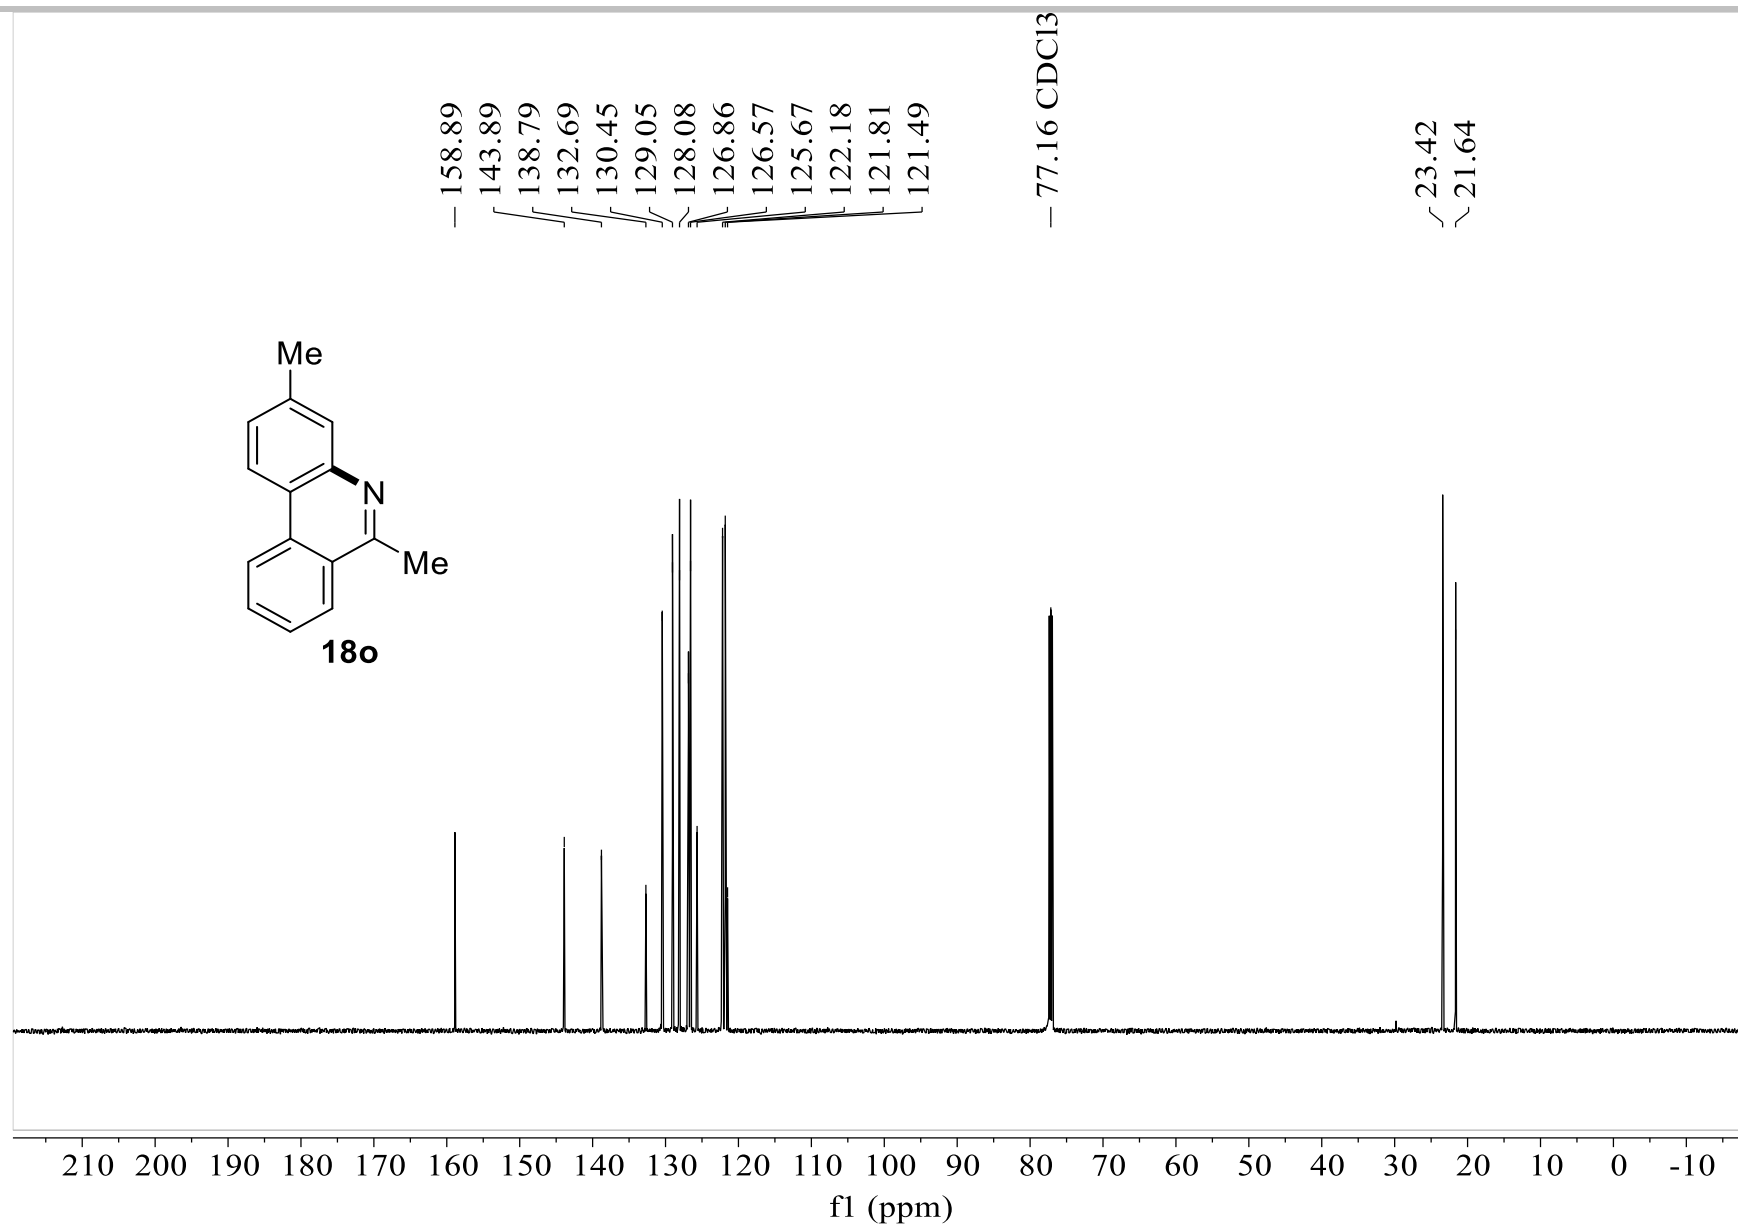

# SUPPORTING INFORMATION

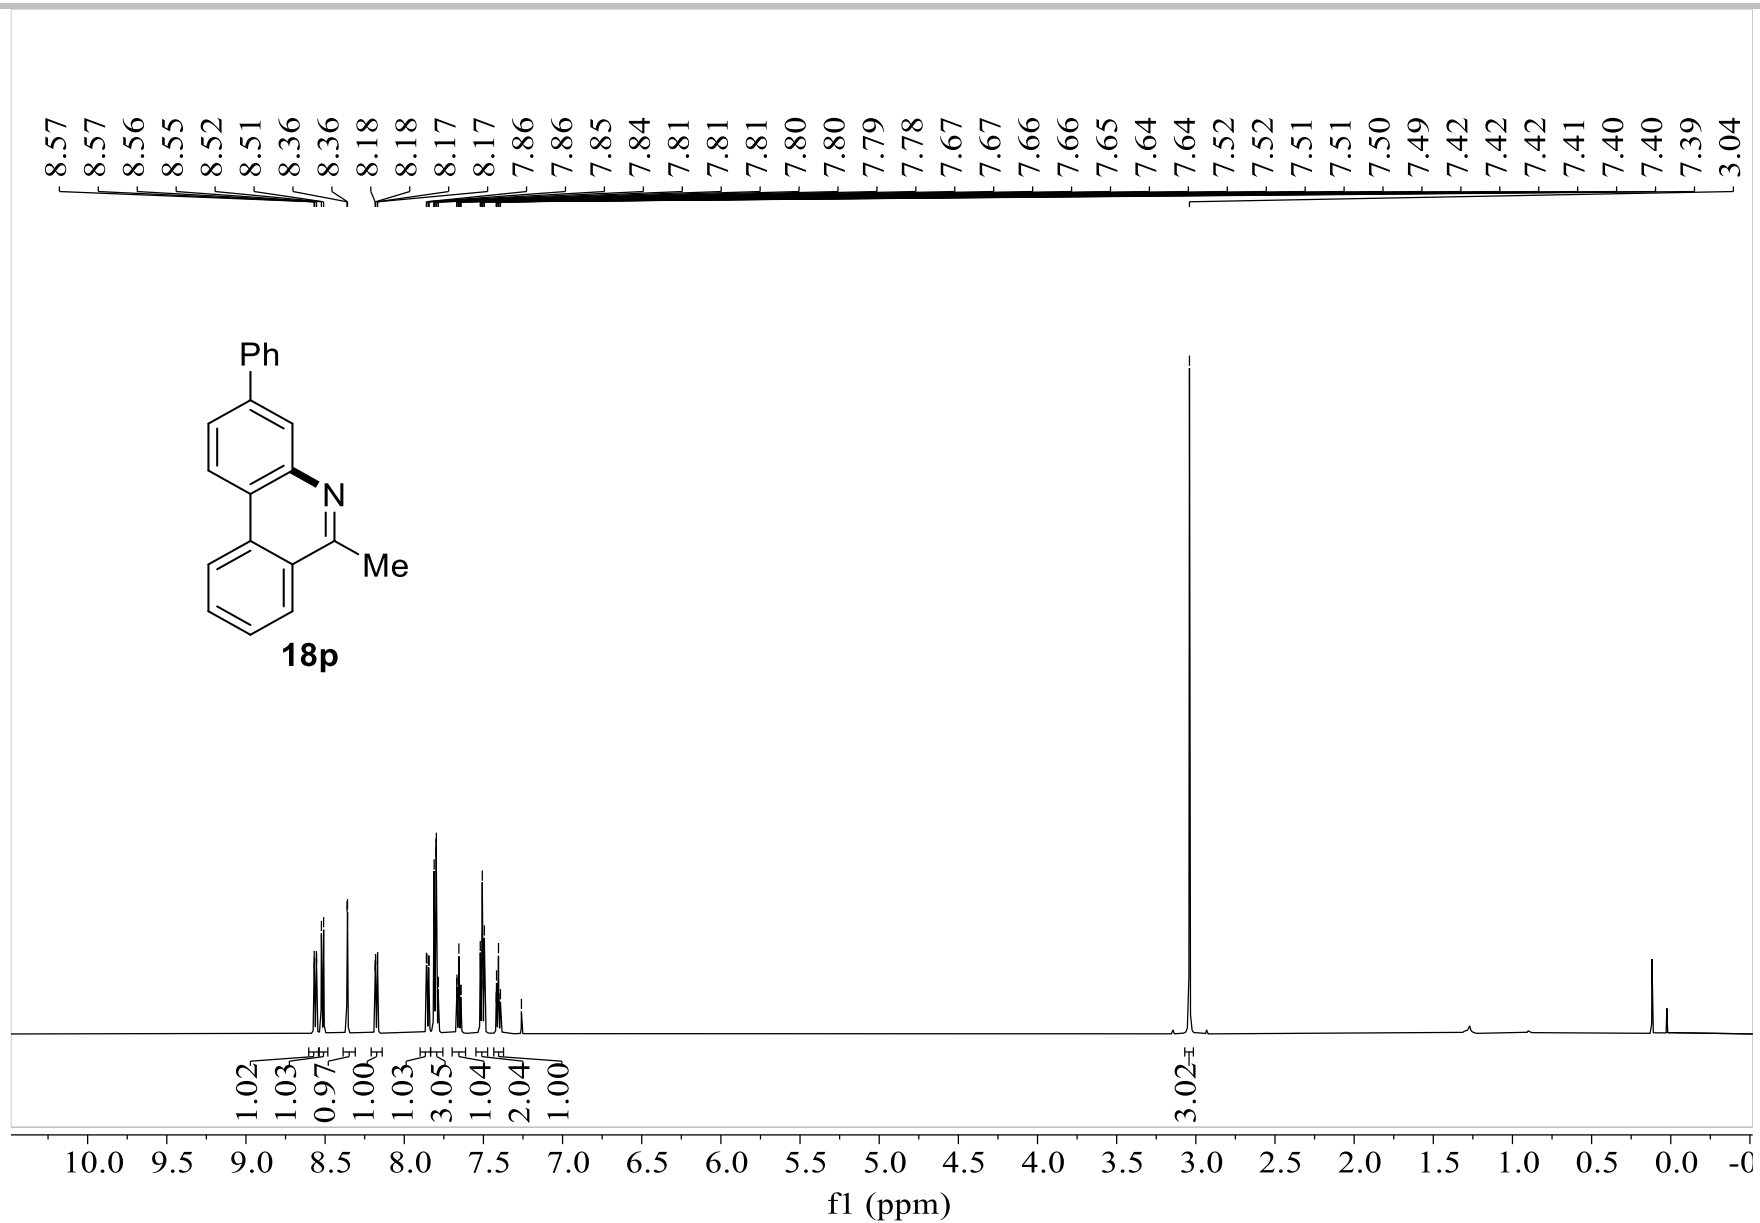



# SUPPORTING INFORMATION

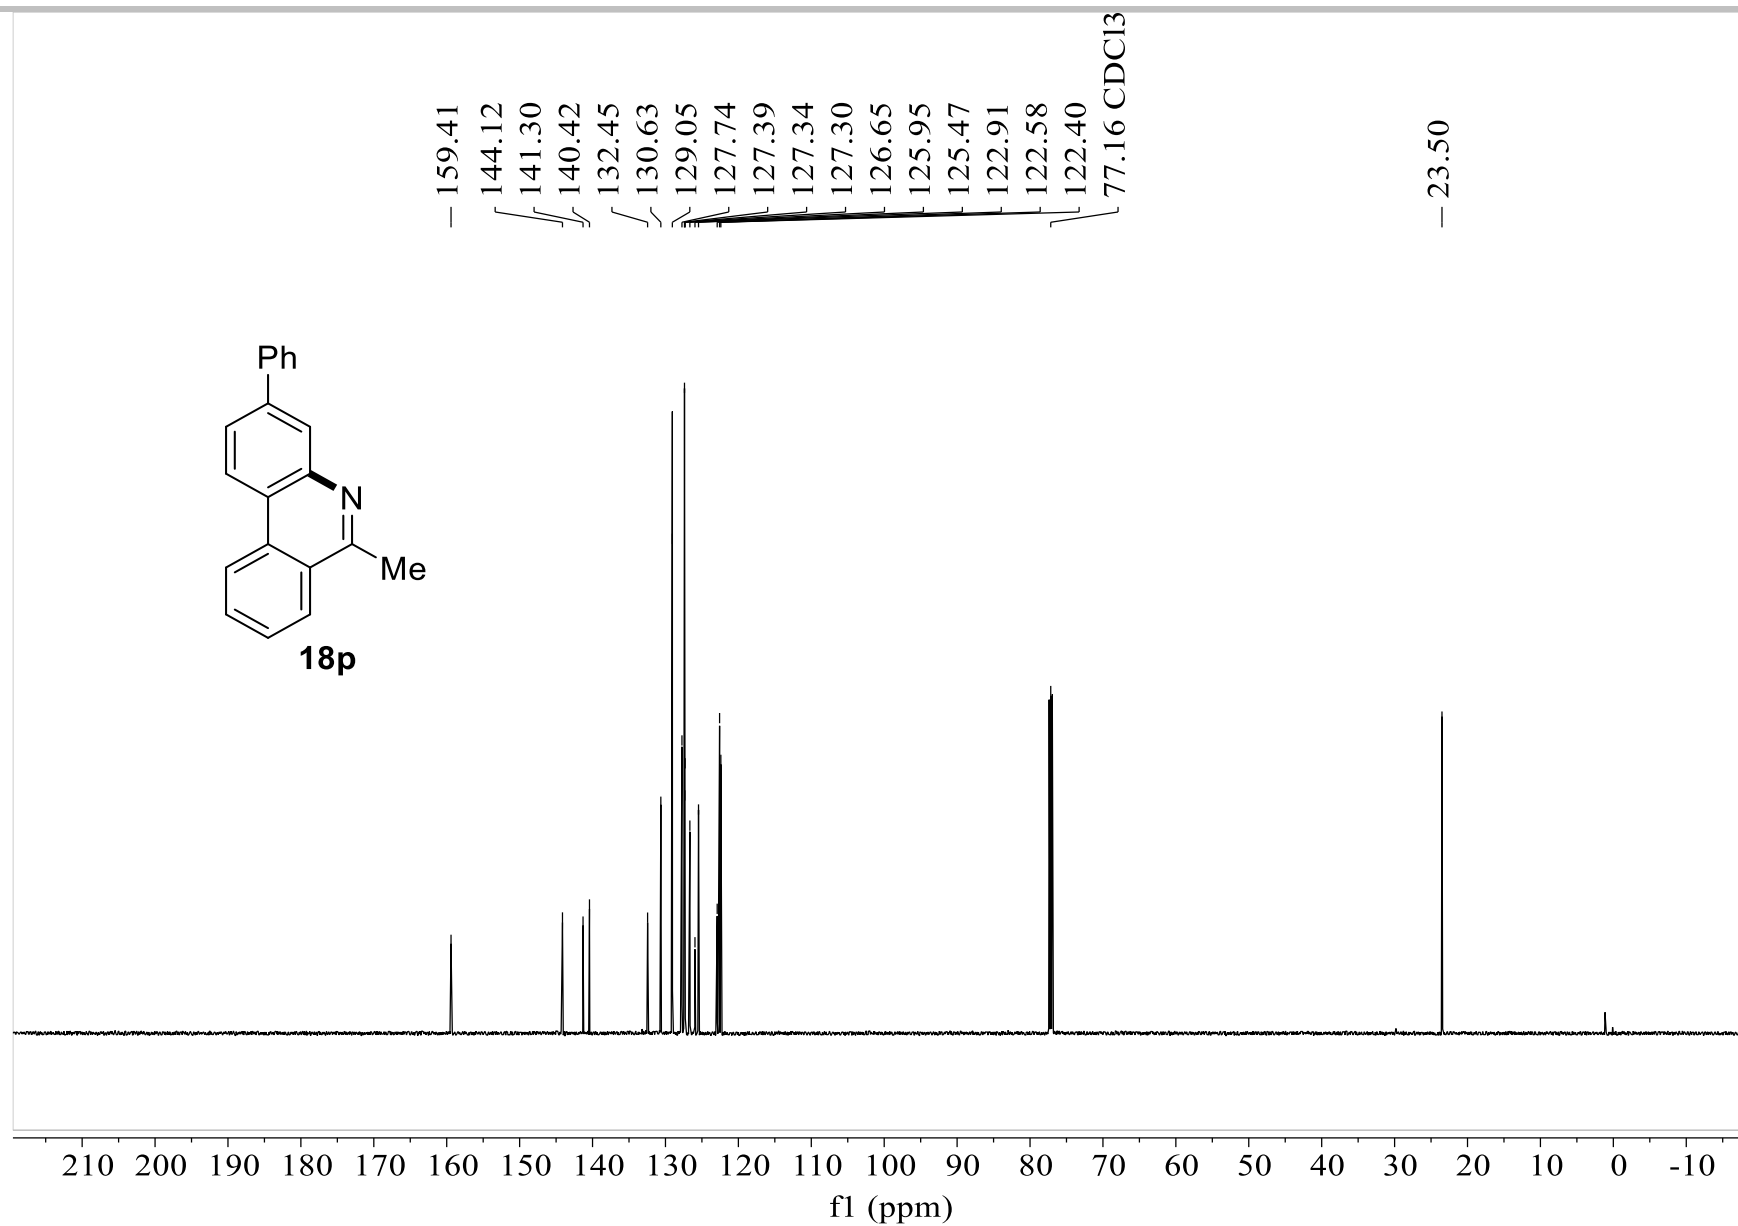

SUPPORTING INFORMATION

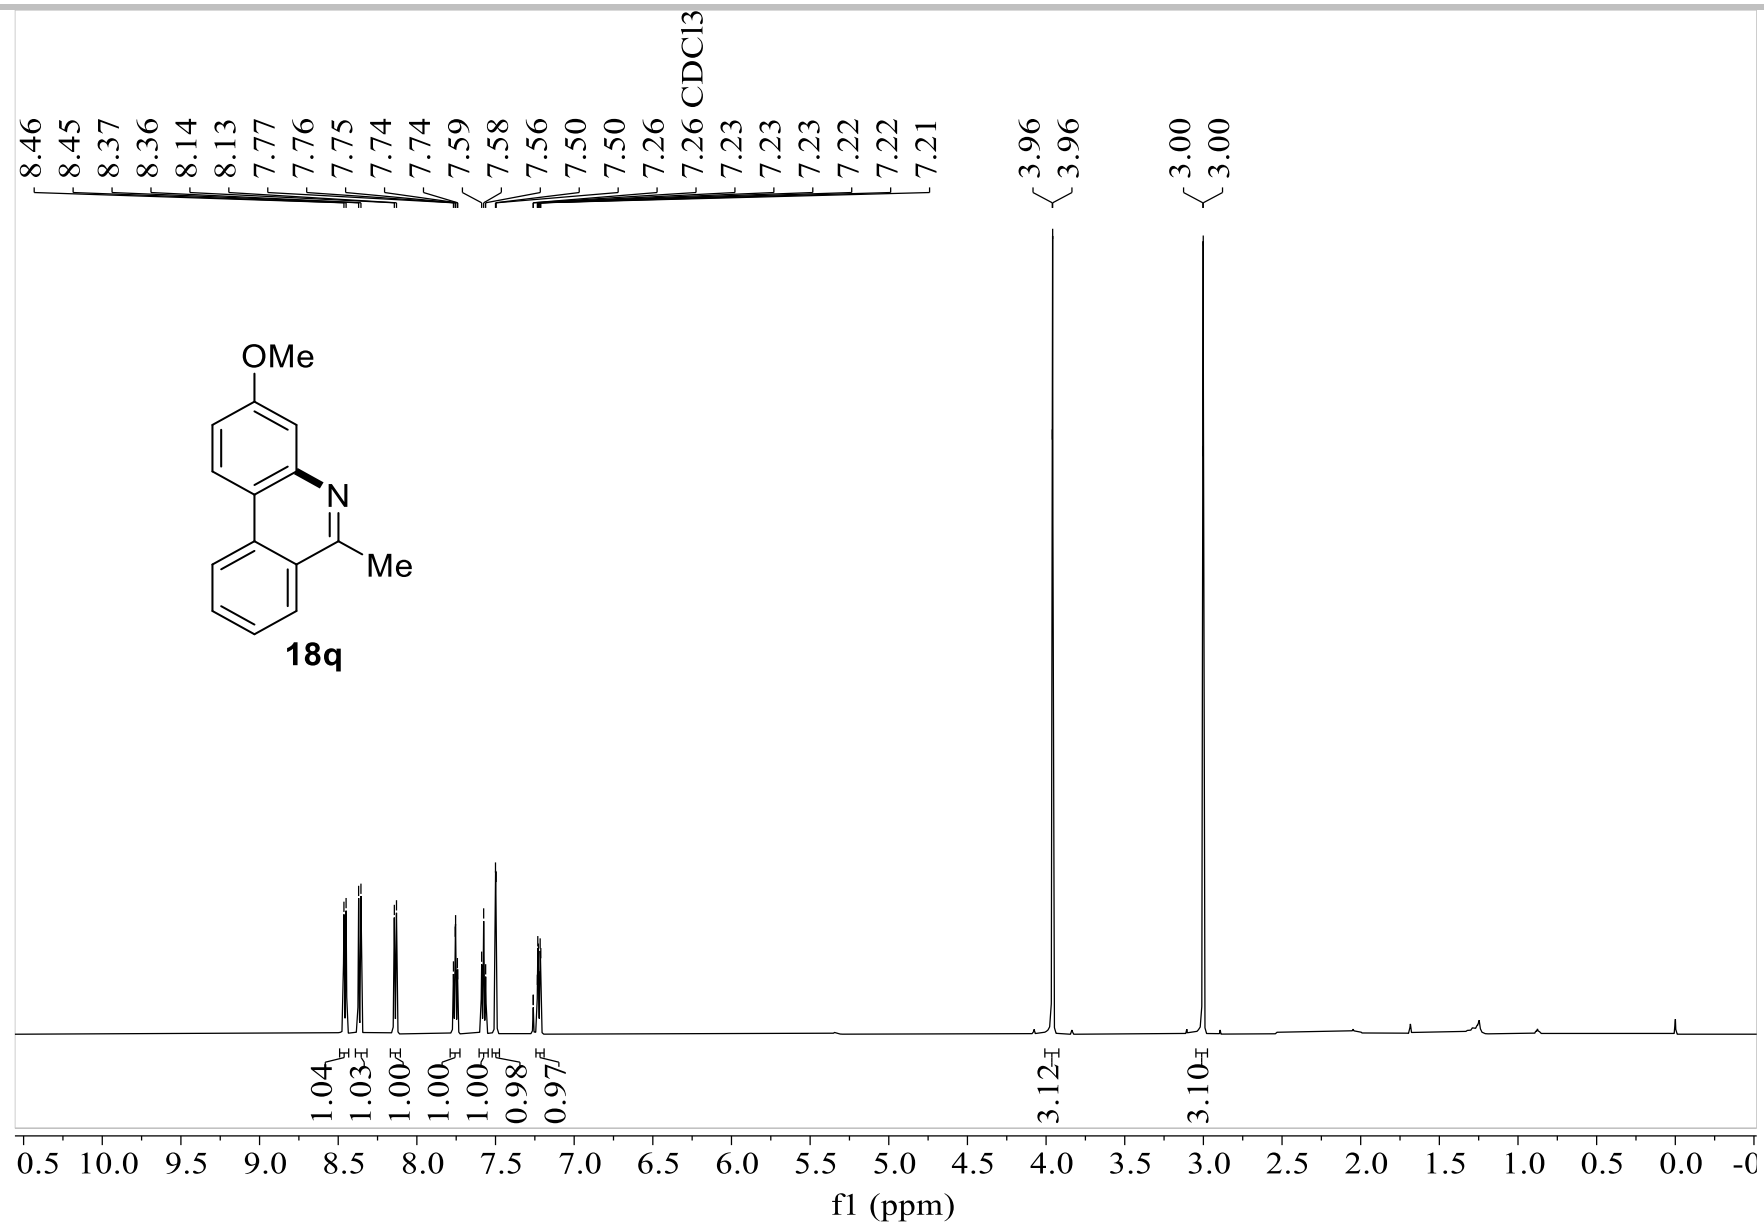

SUPPORTING INFORMATION

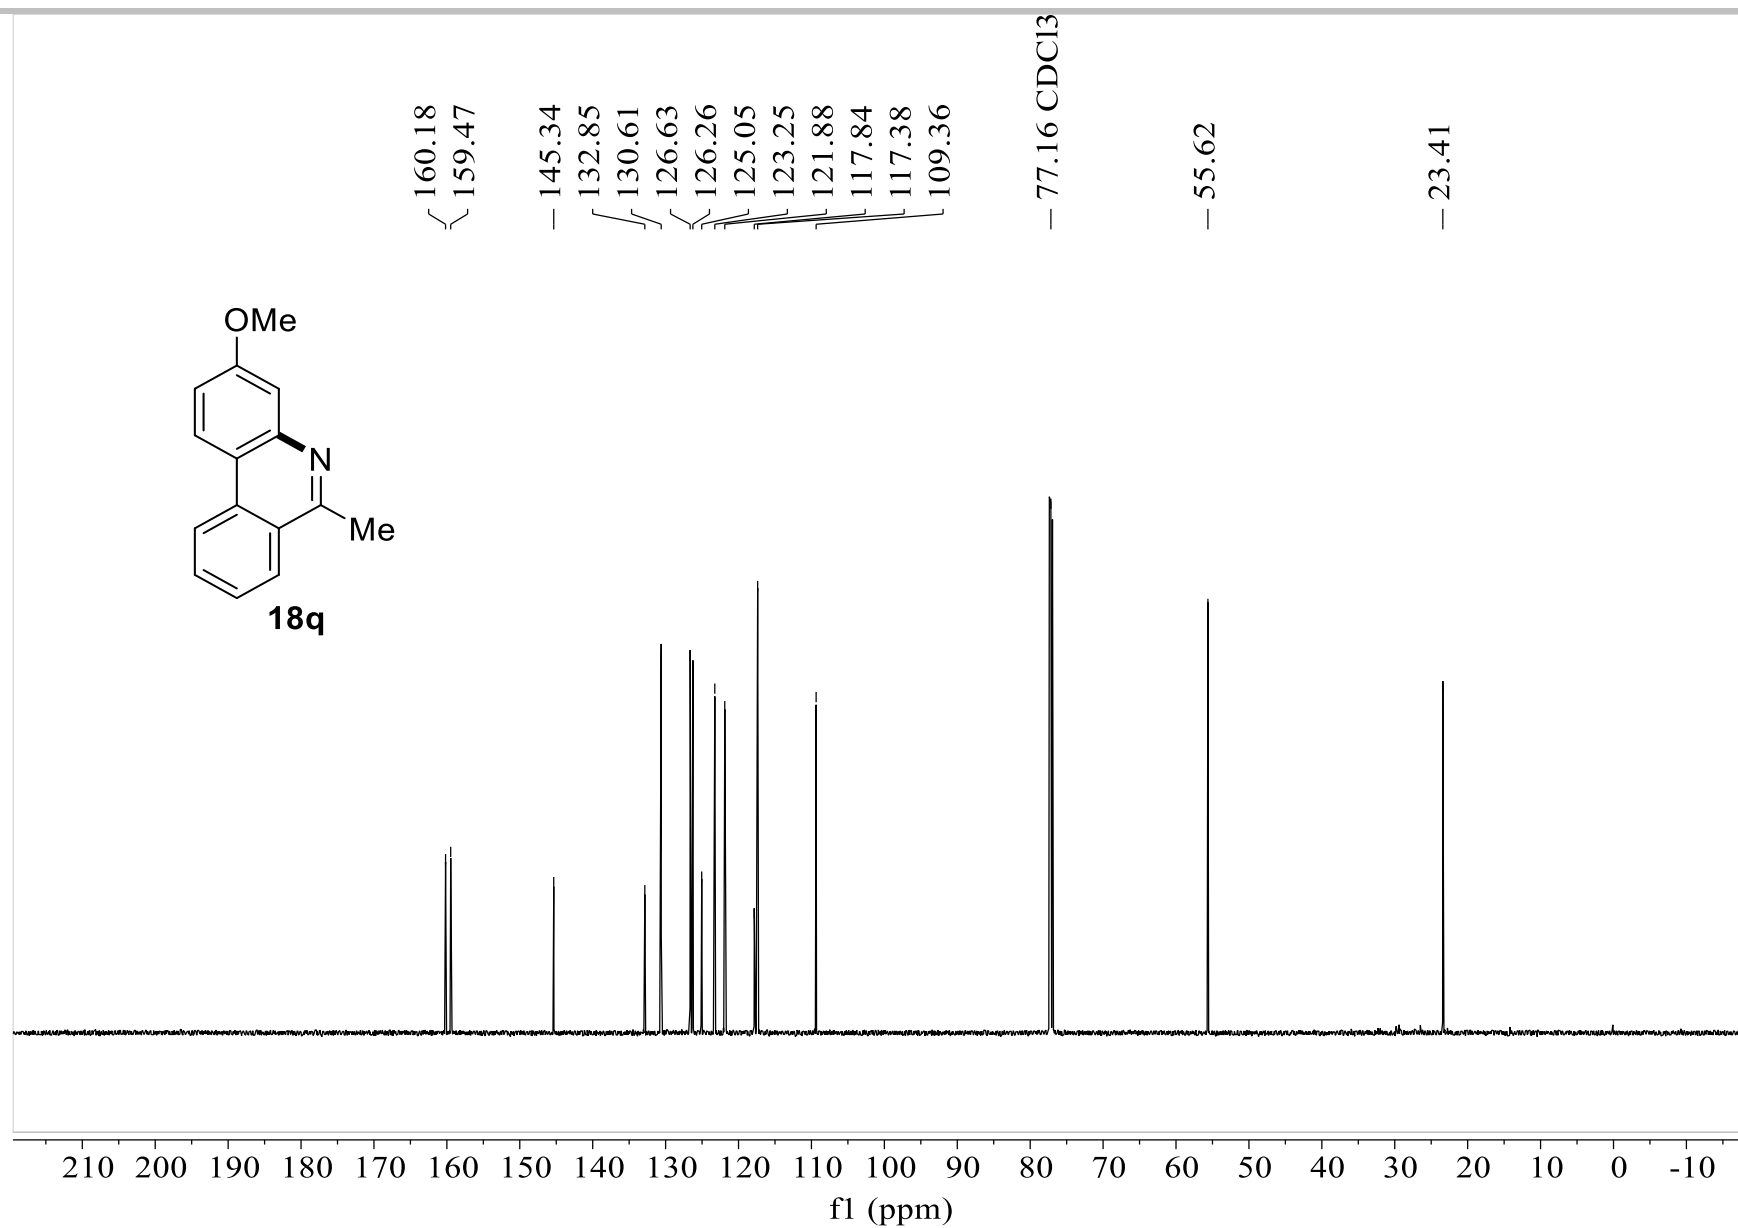

SUPPORTING INFORMATION

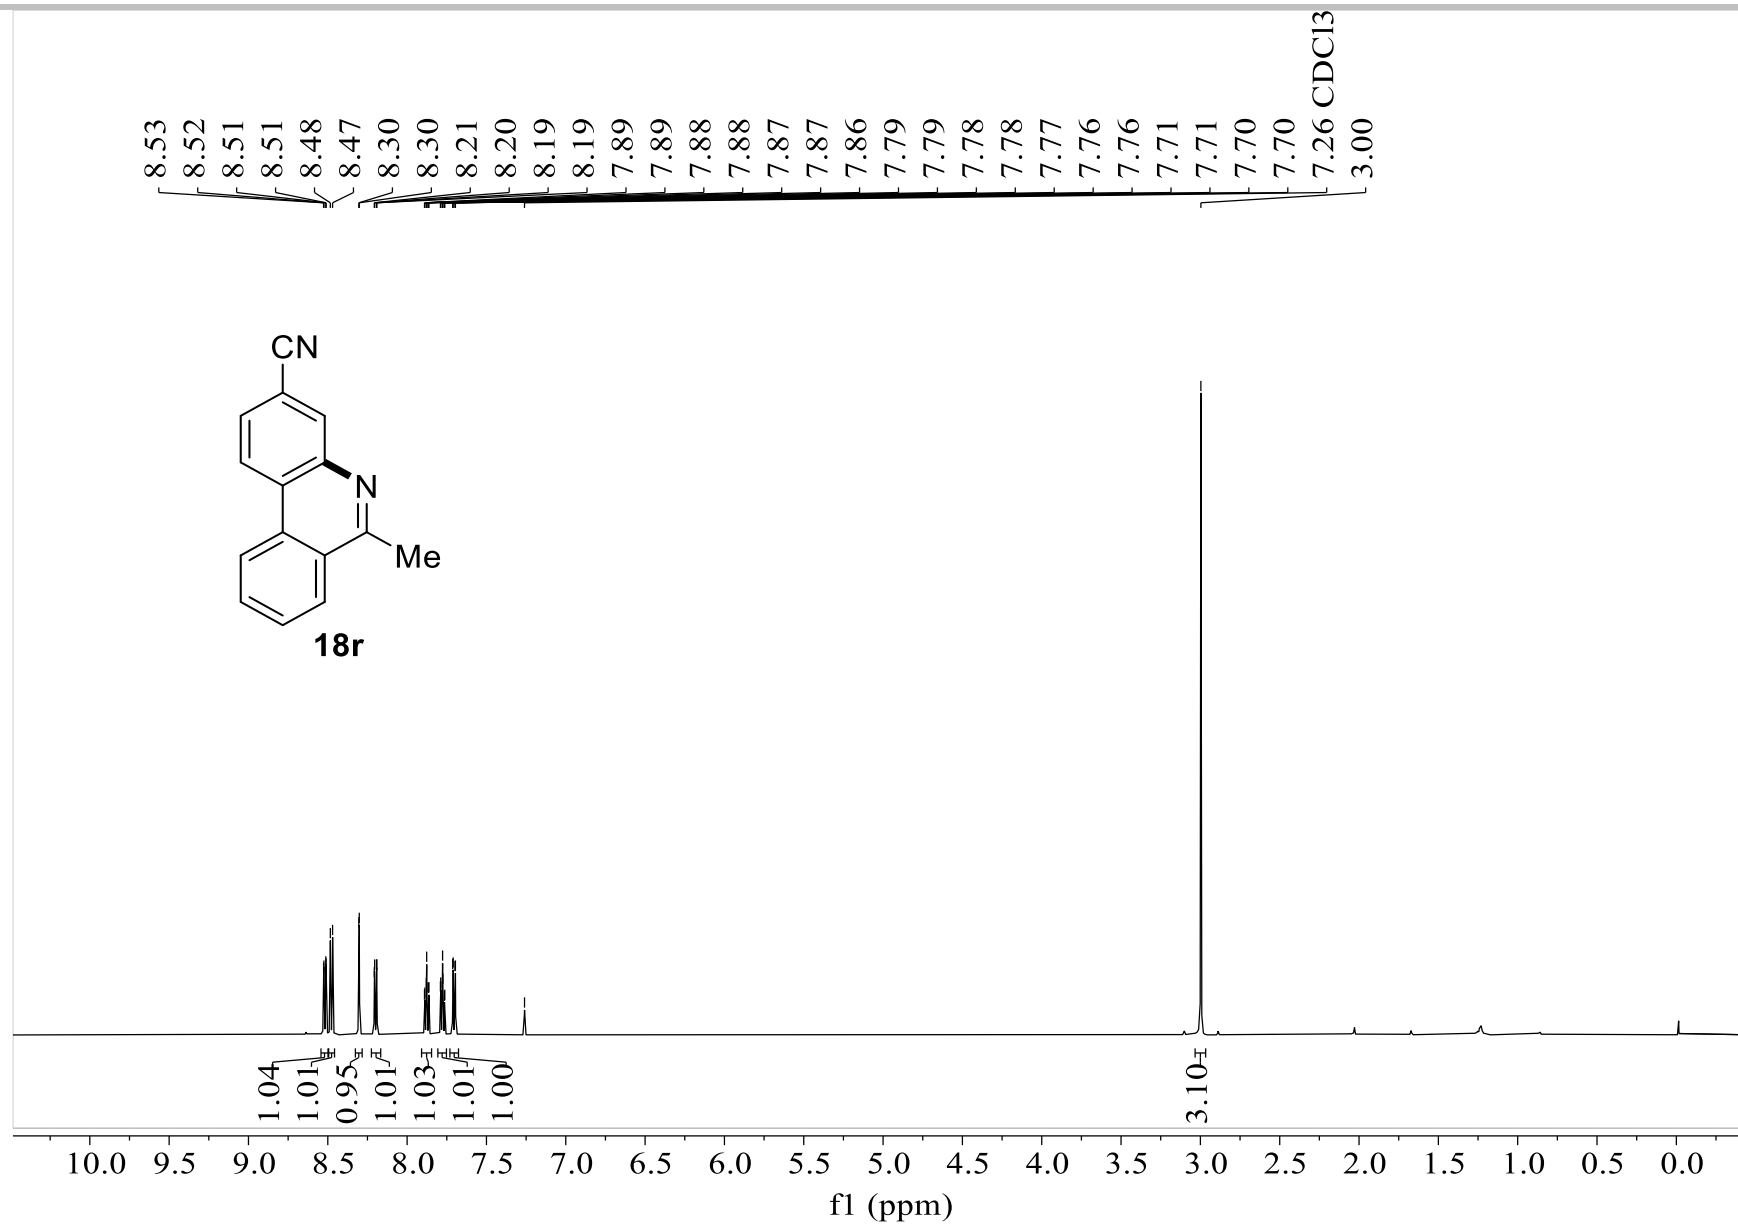

SUPPORTING INFORMATION

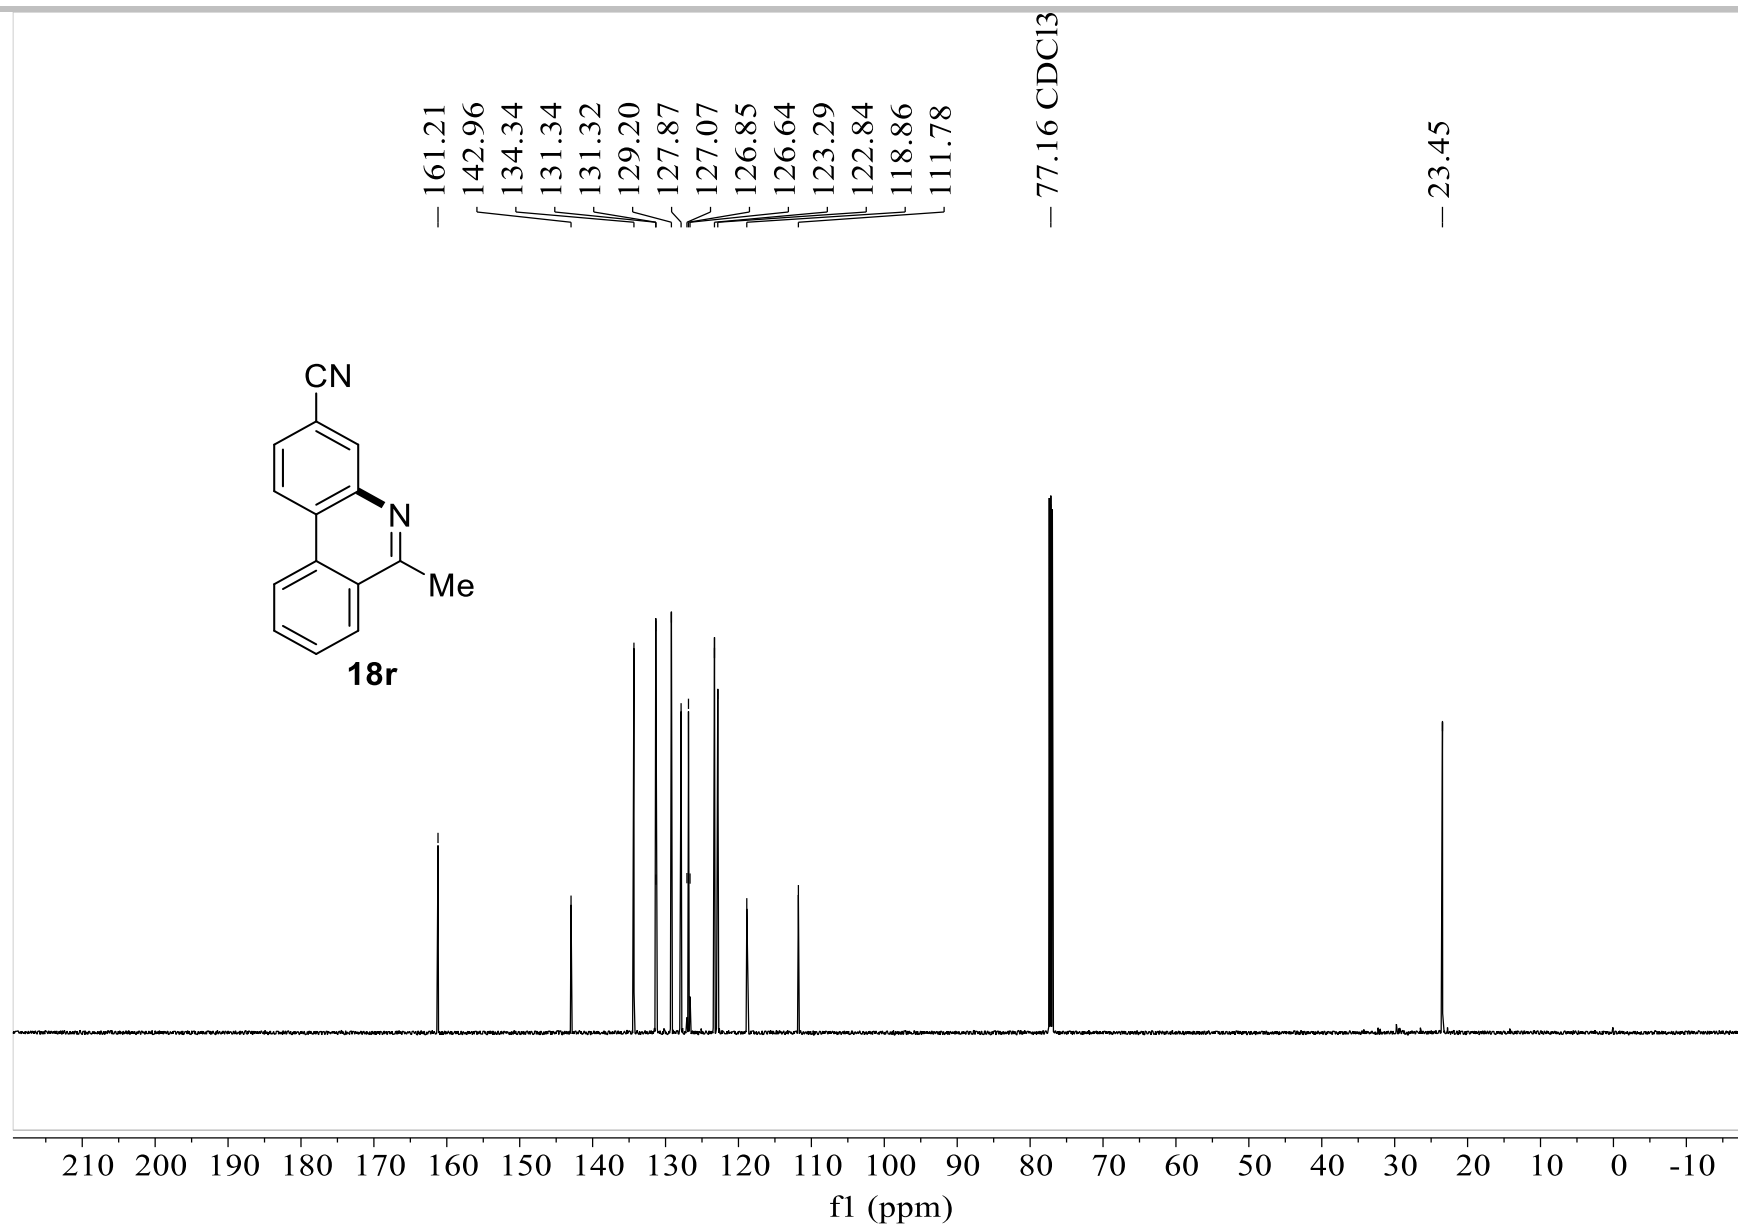

# SUPPORTING INFORMATION

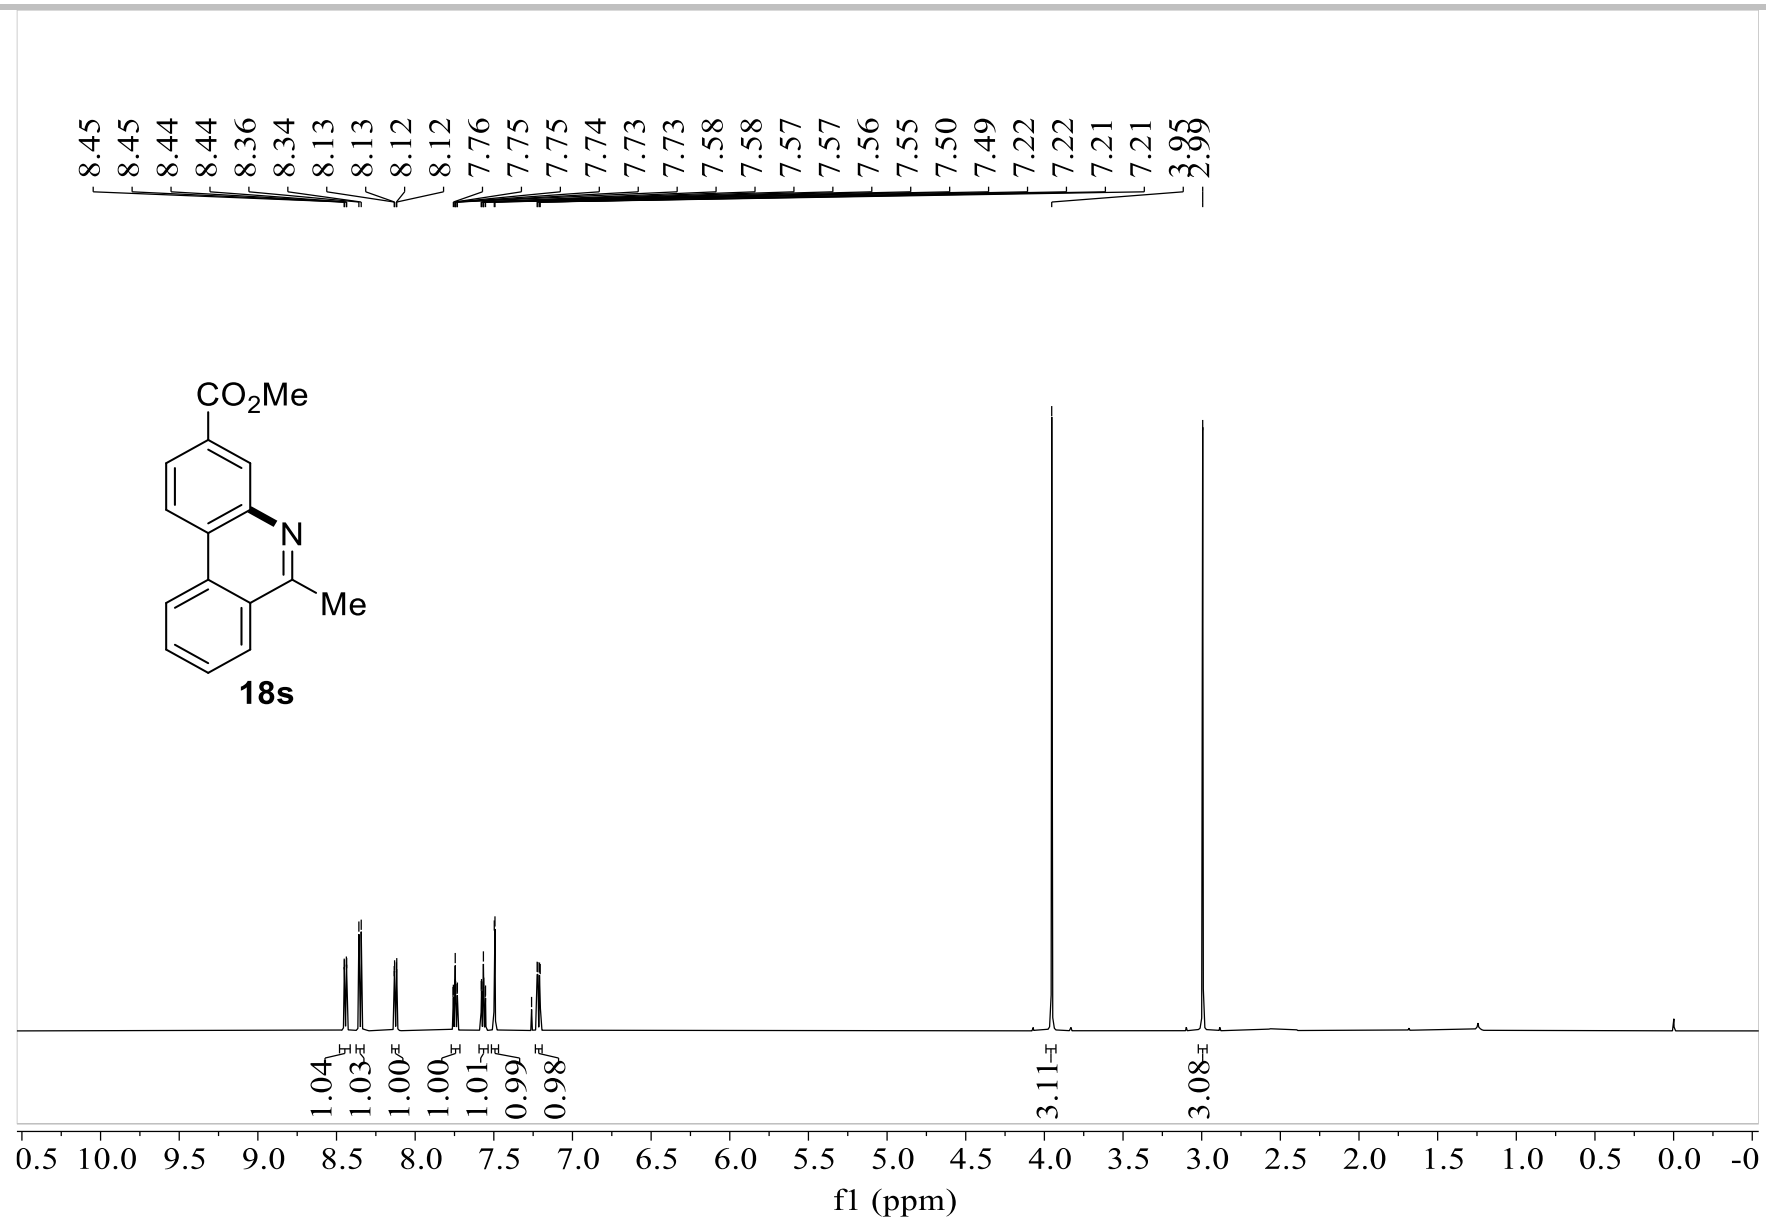

SUPPORTING INFORMATION

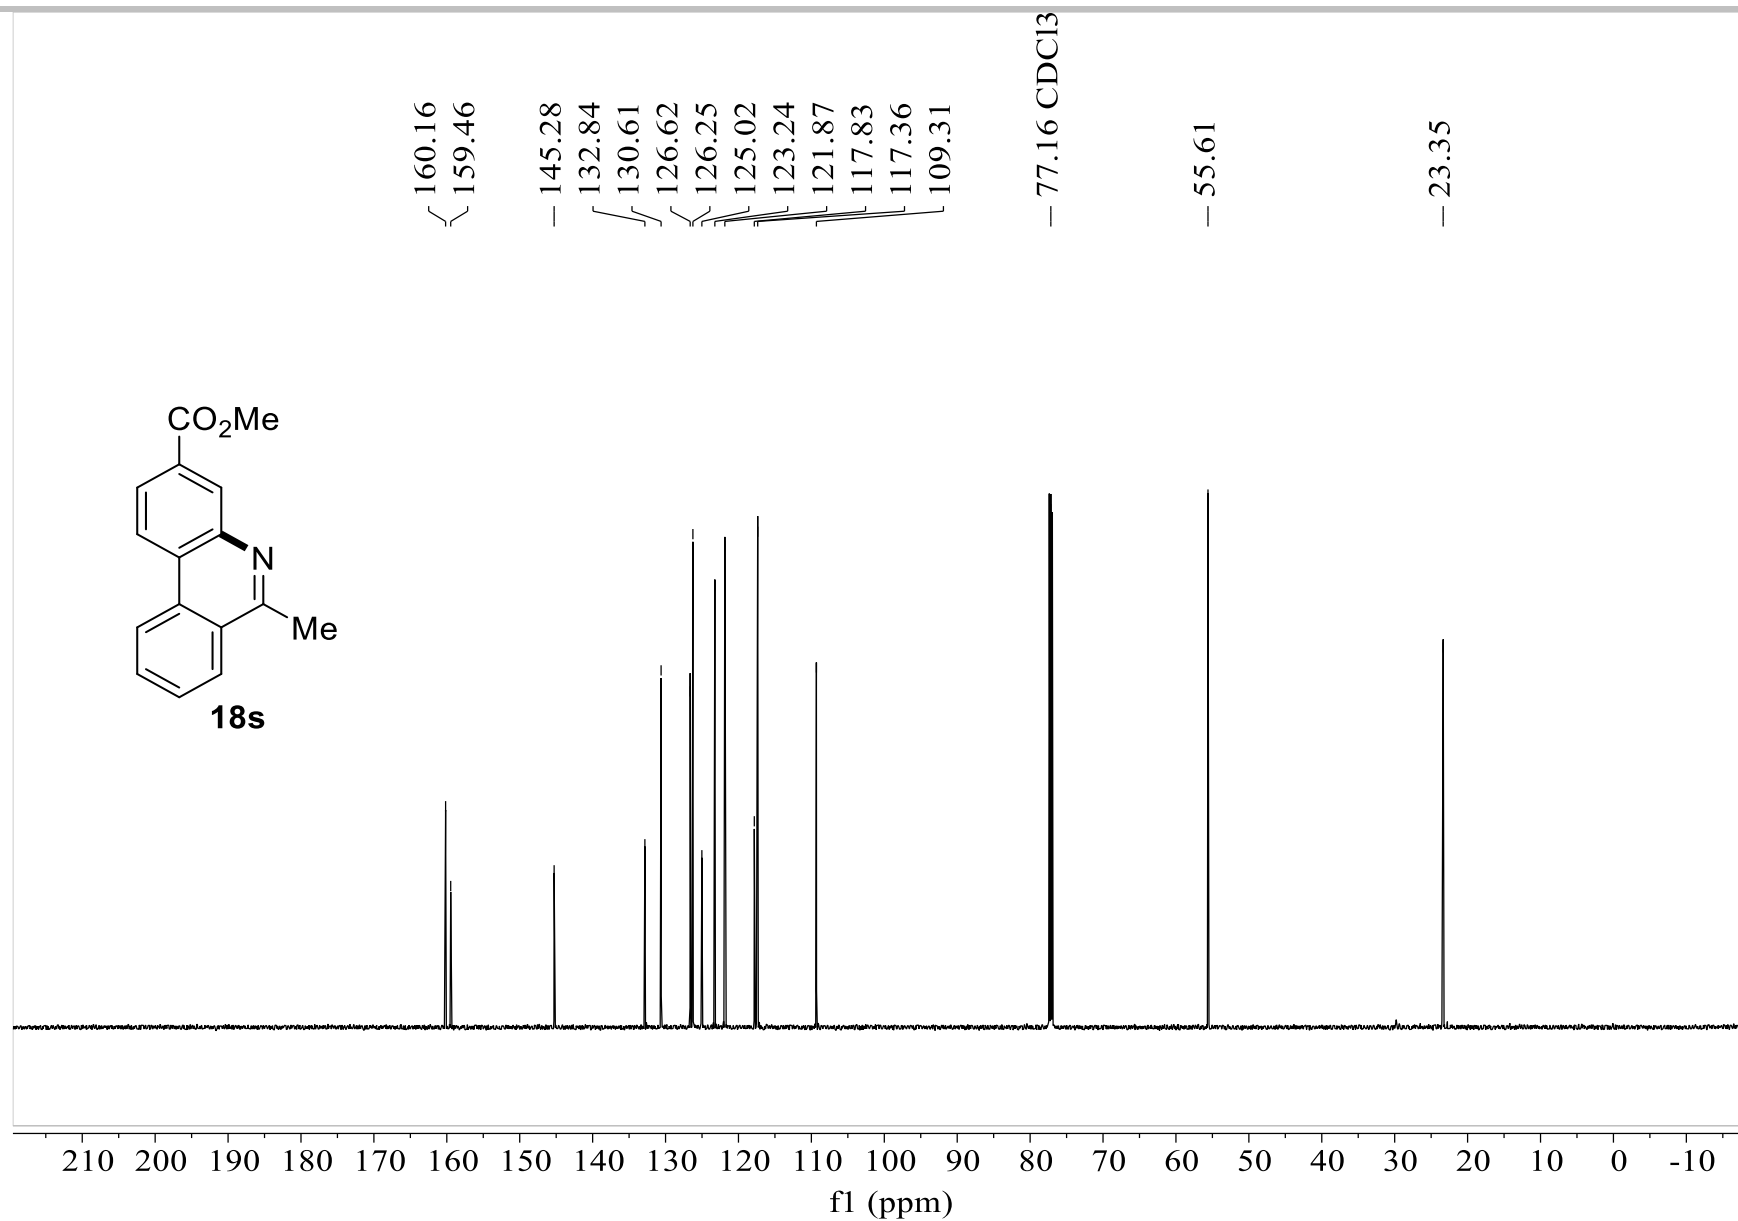

SUPPORTING INFORMATION

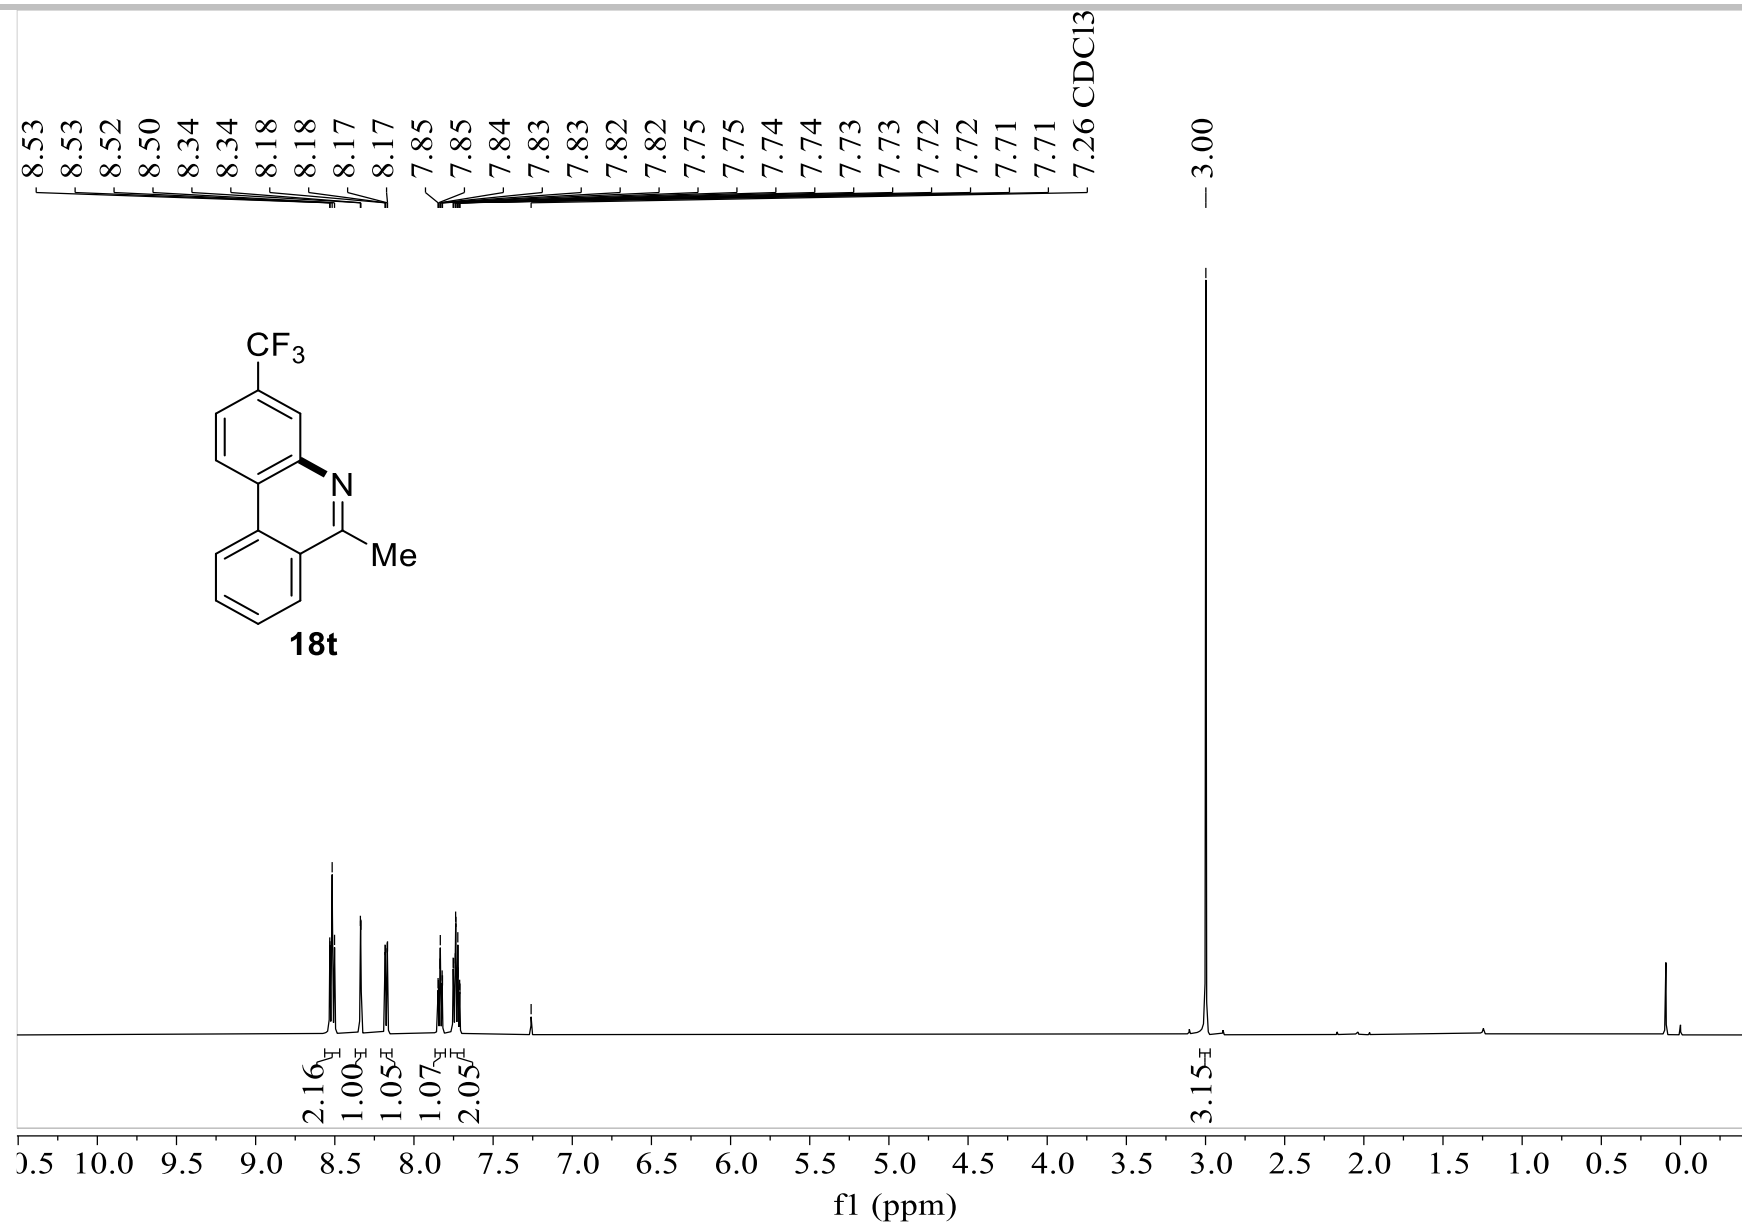



# SUPPORTING INFORMATION

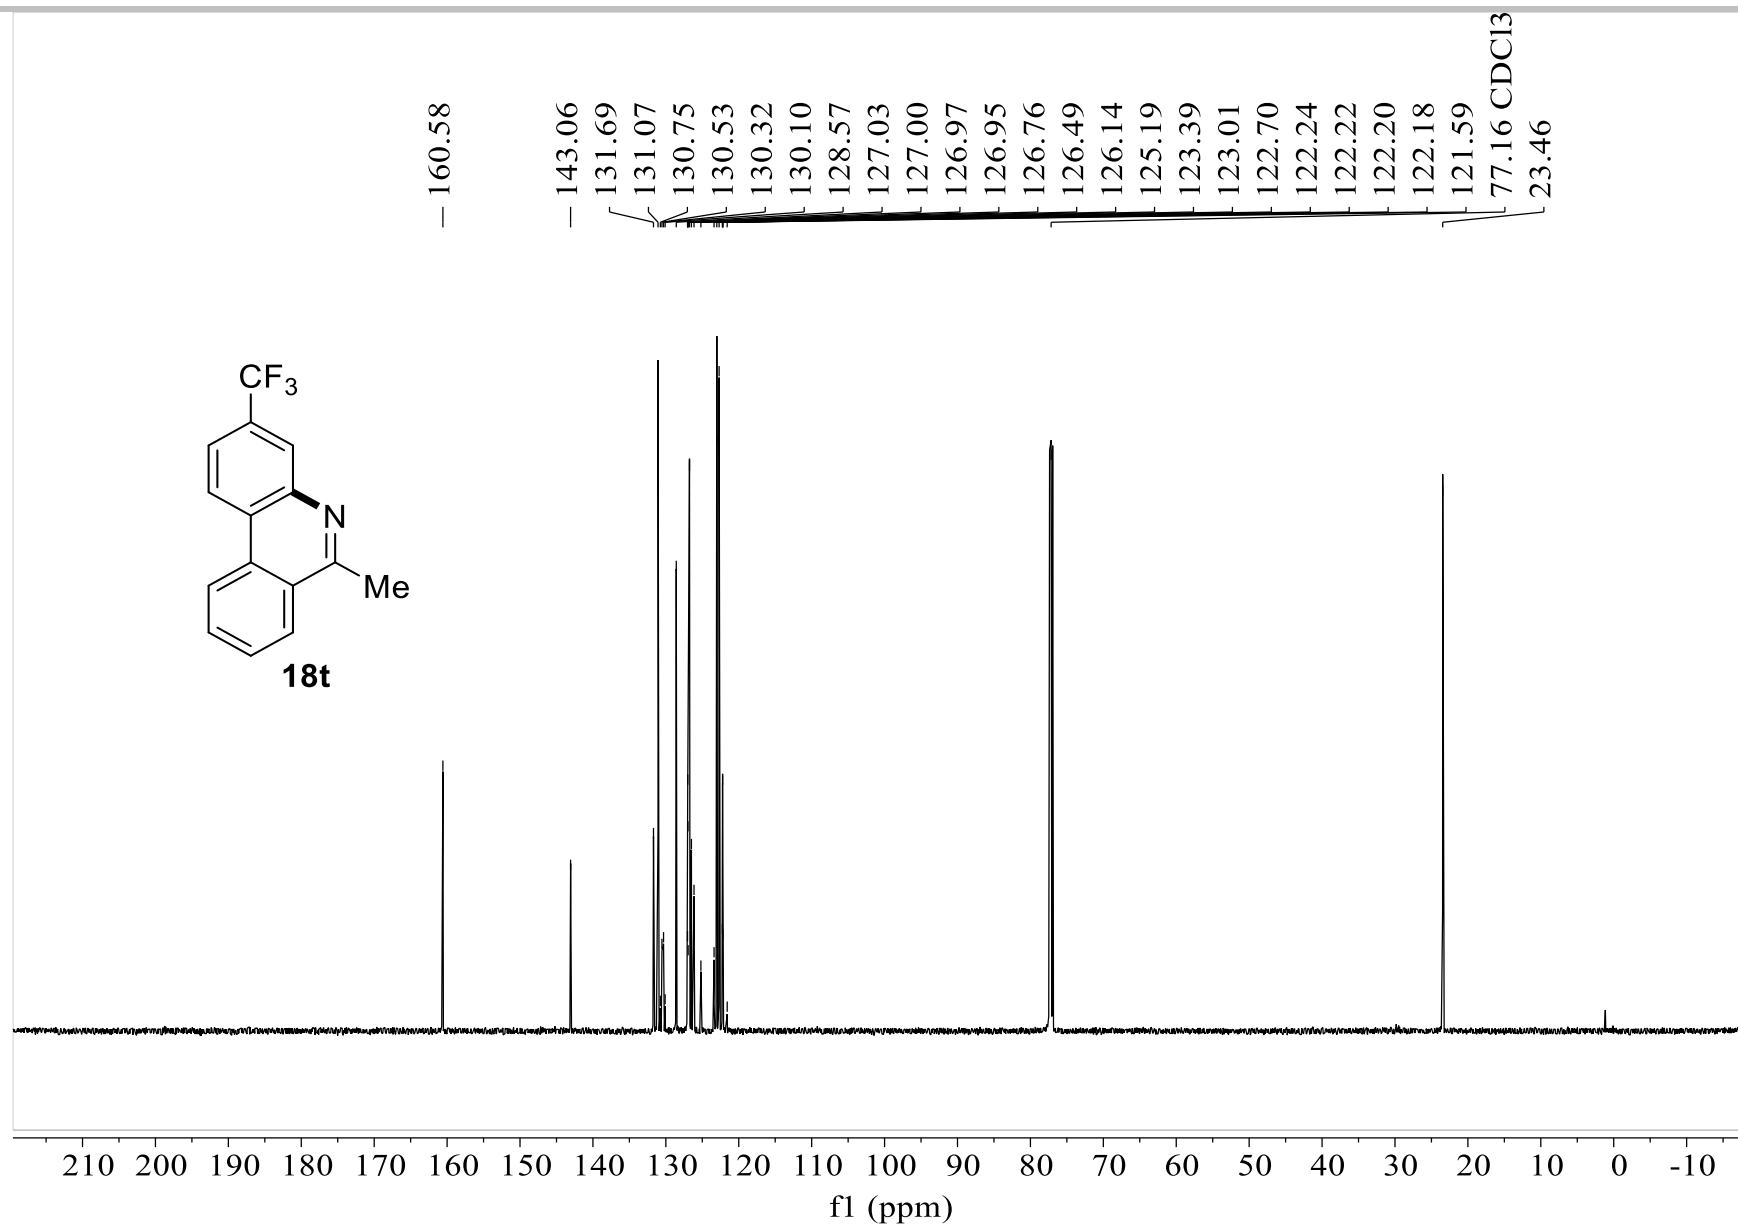

# SUPPORTING INFORMATION

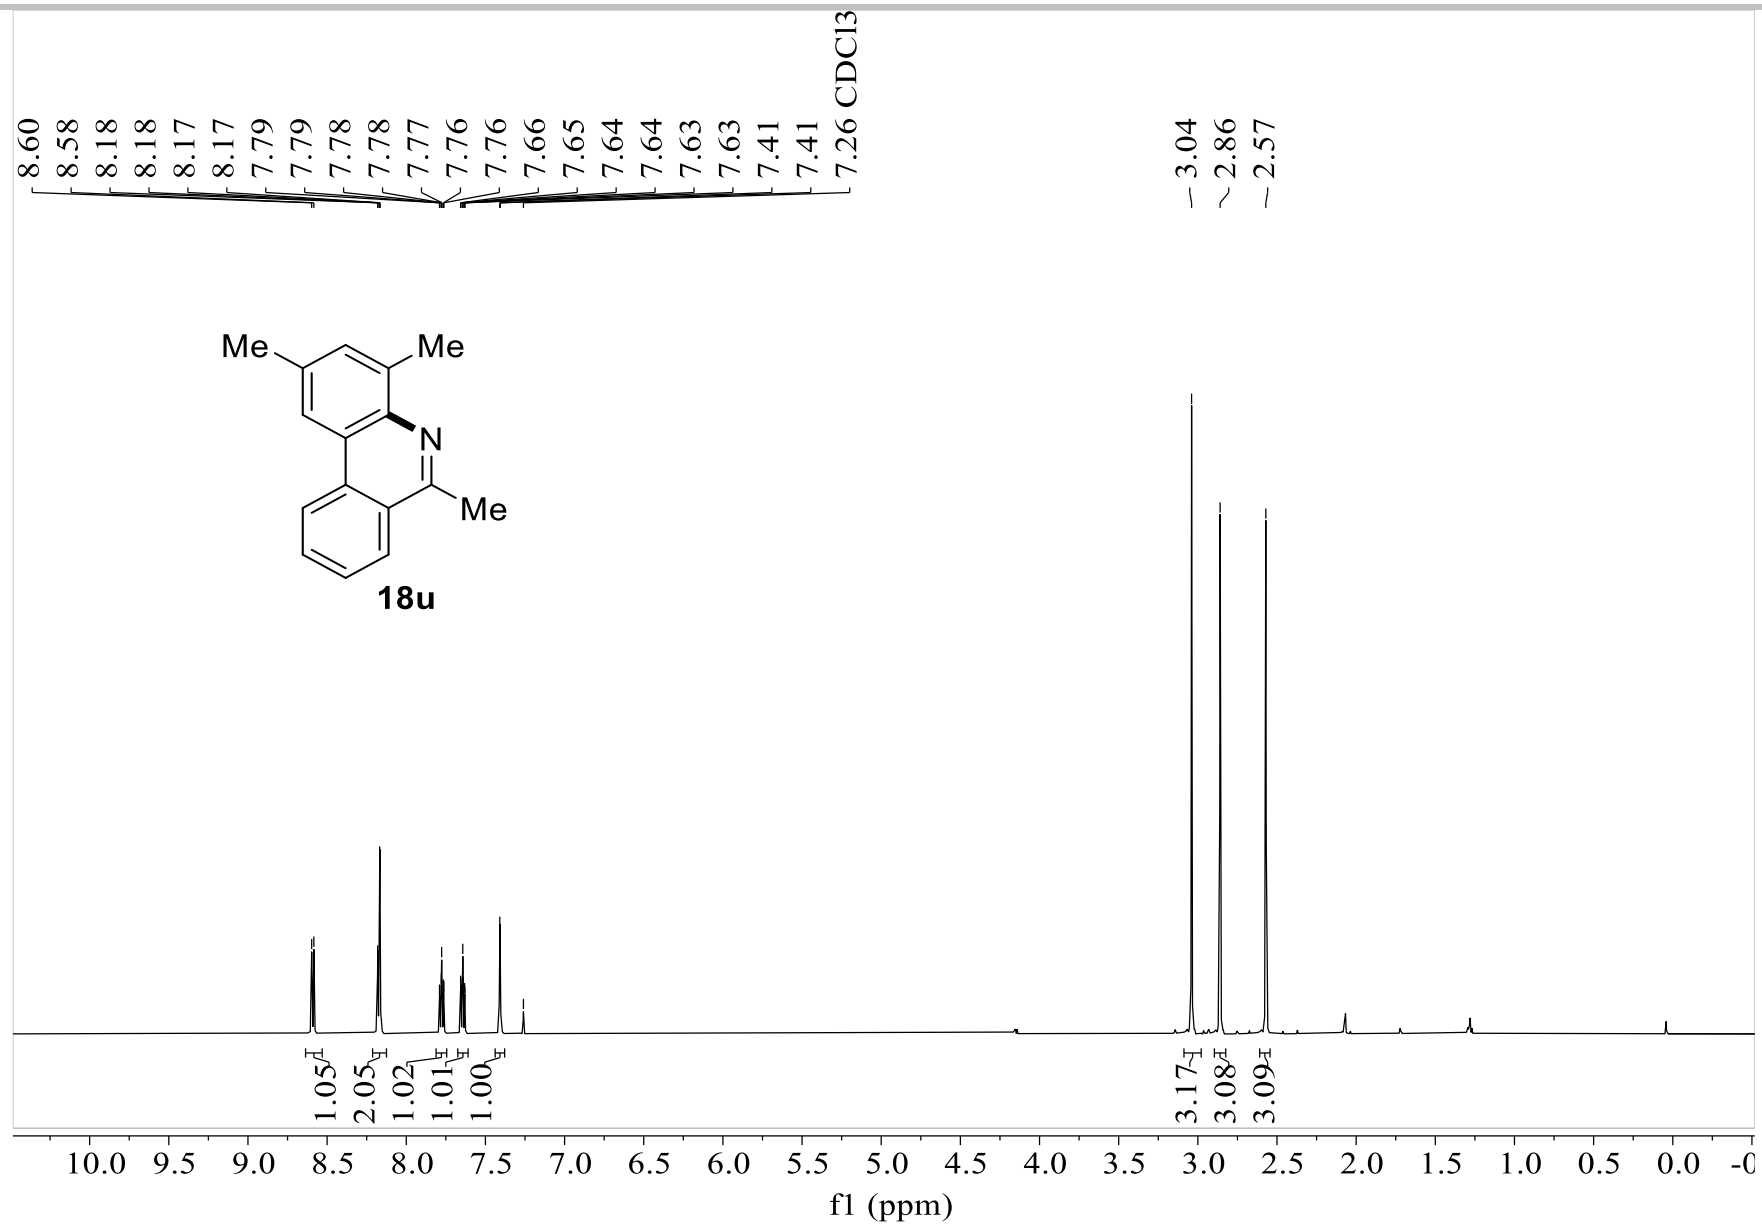

SUPPORTING INFORMATION

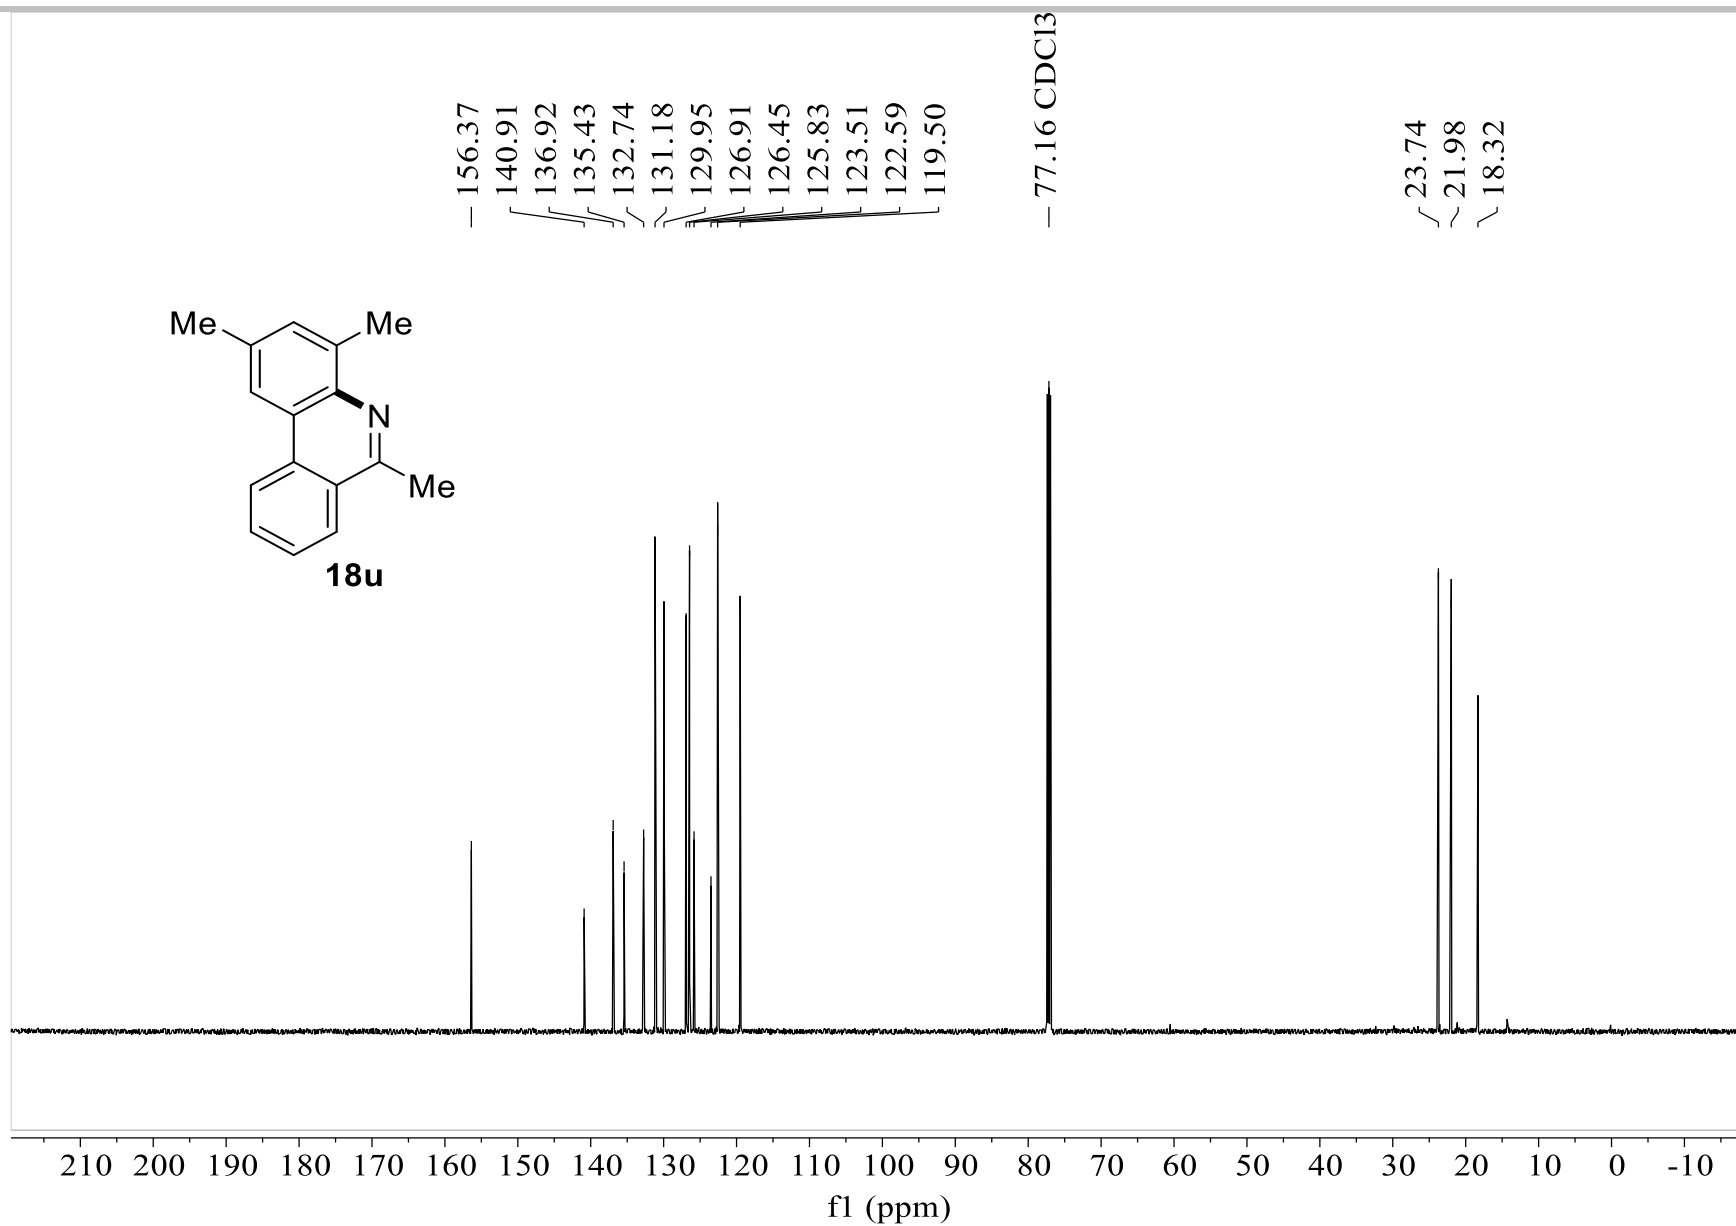

# SUPPORTING INFORMATION

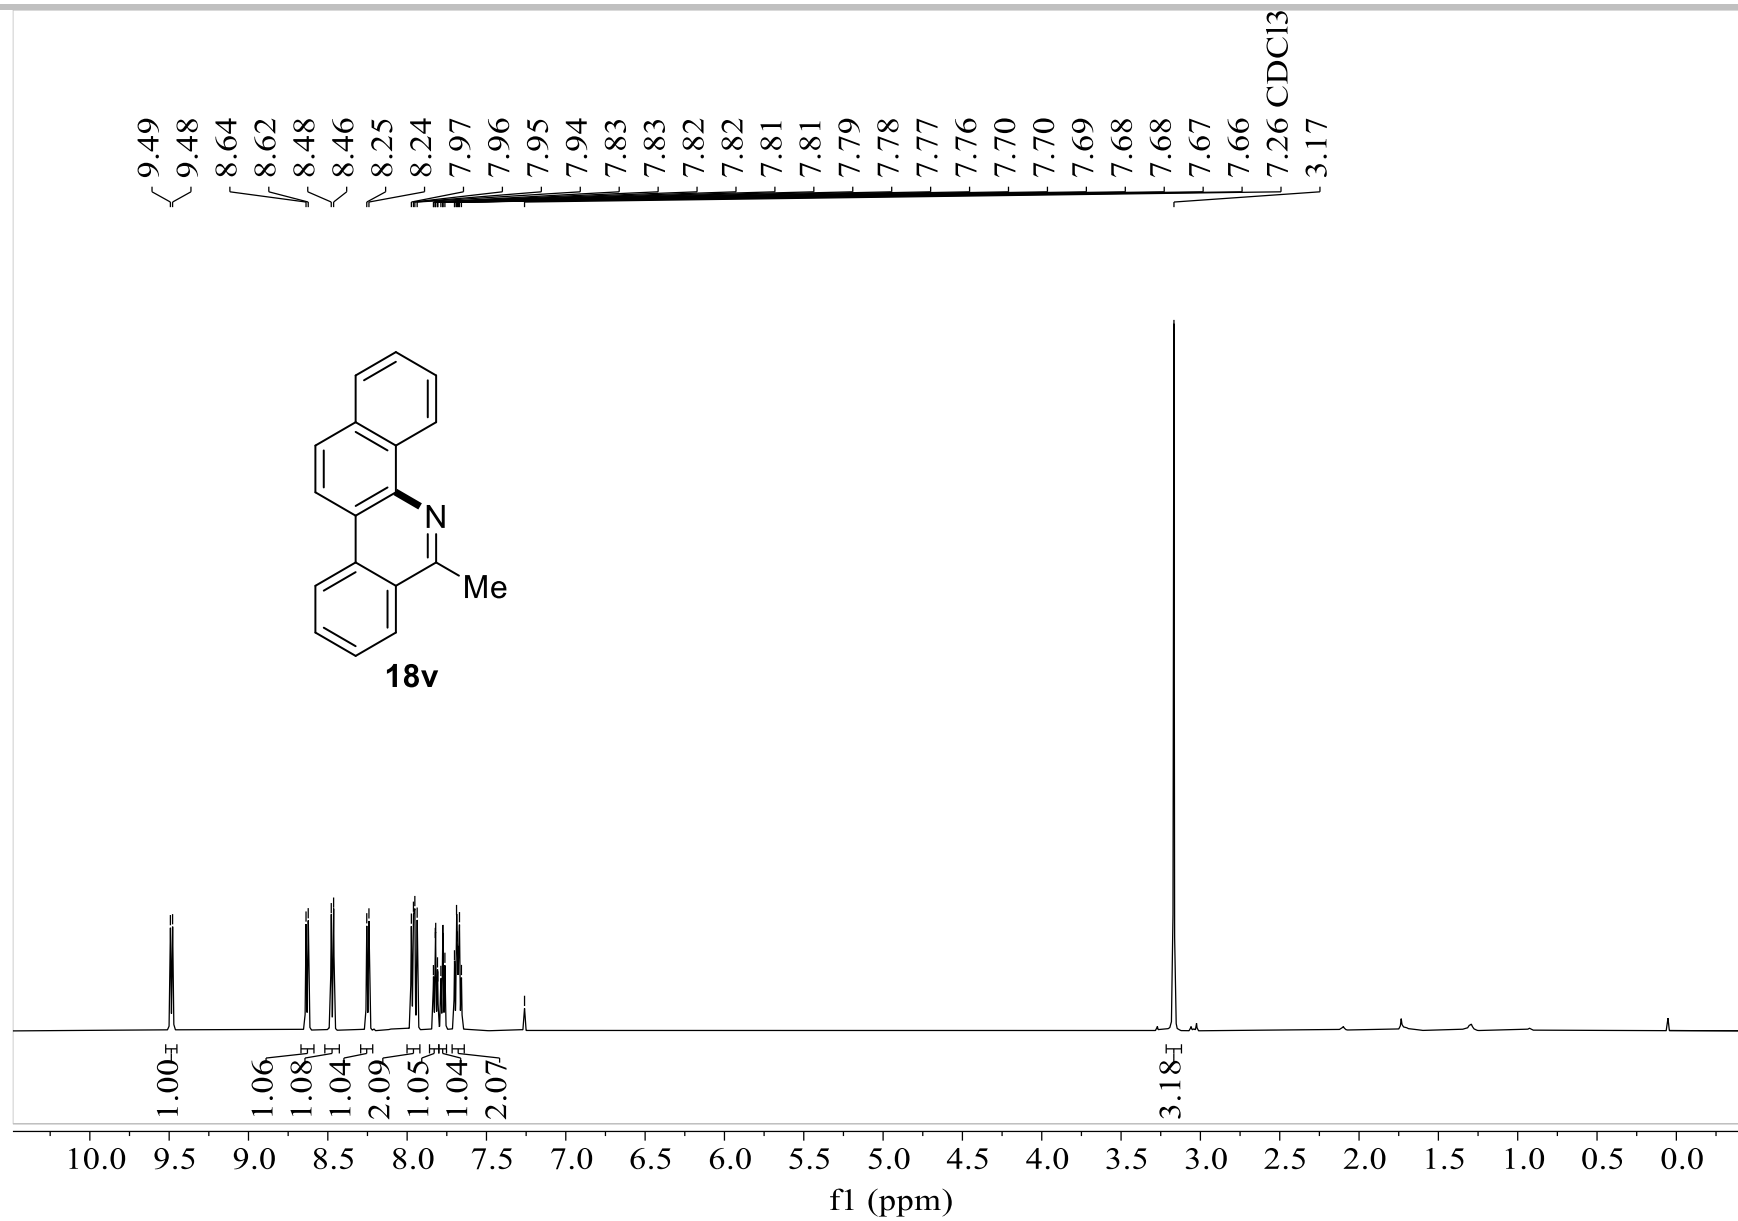

# SUPPORTING INFORMATION

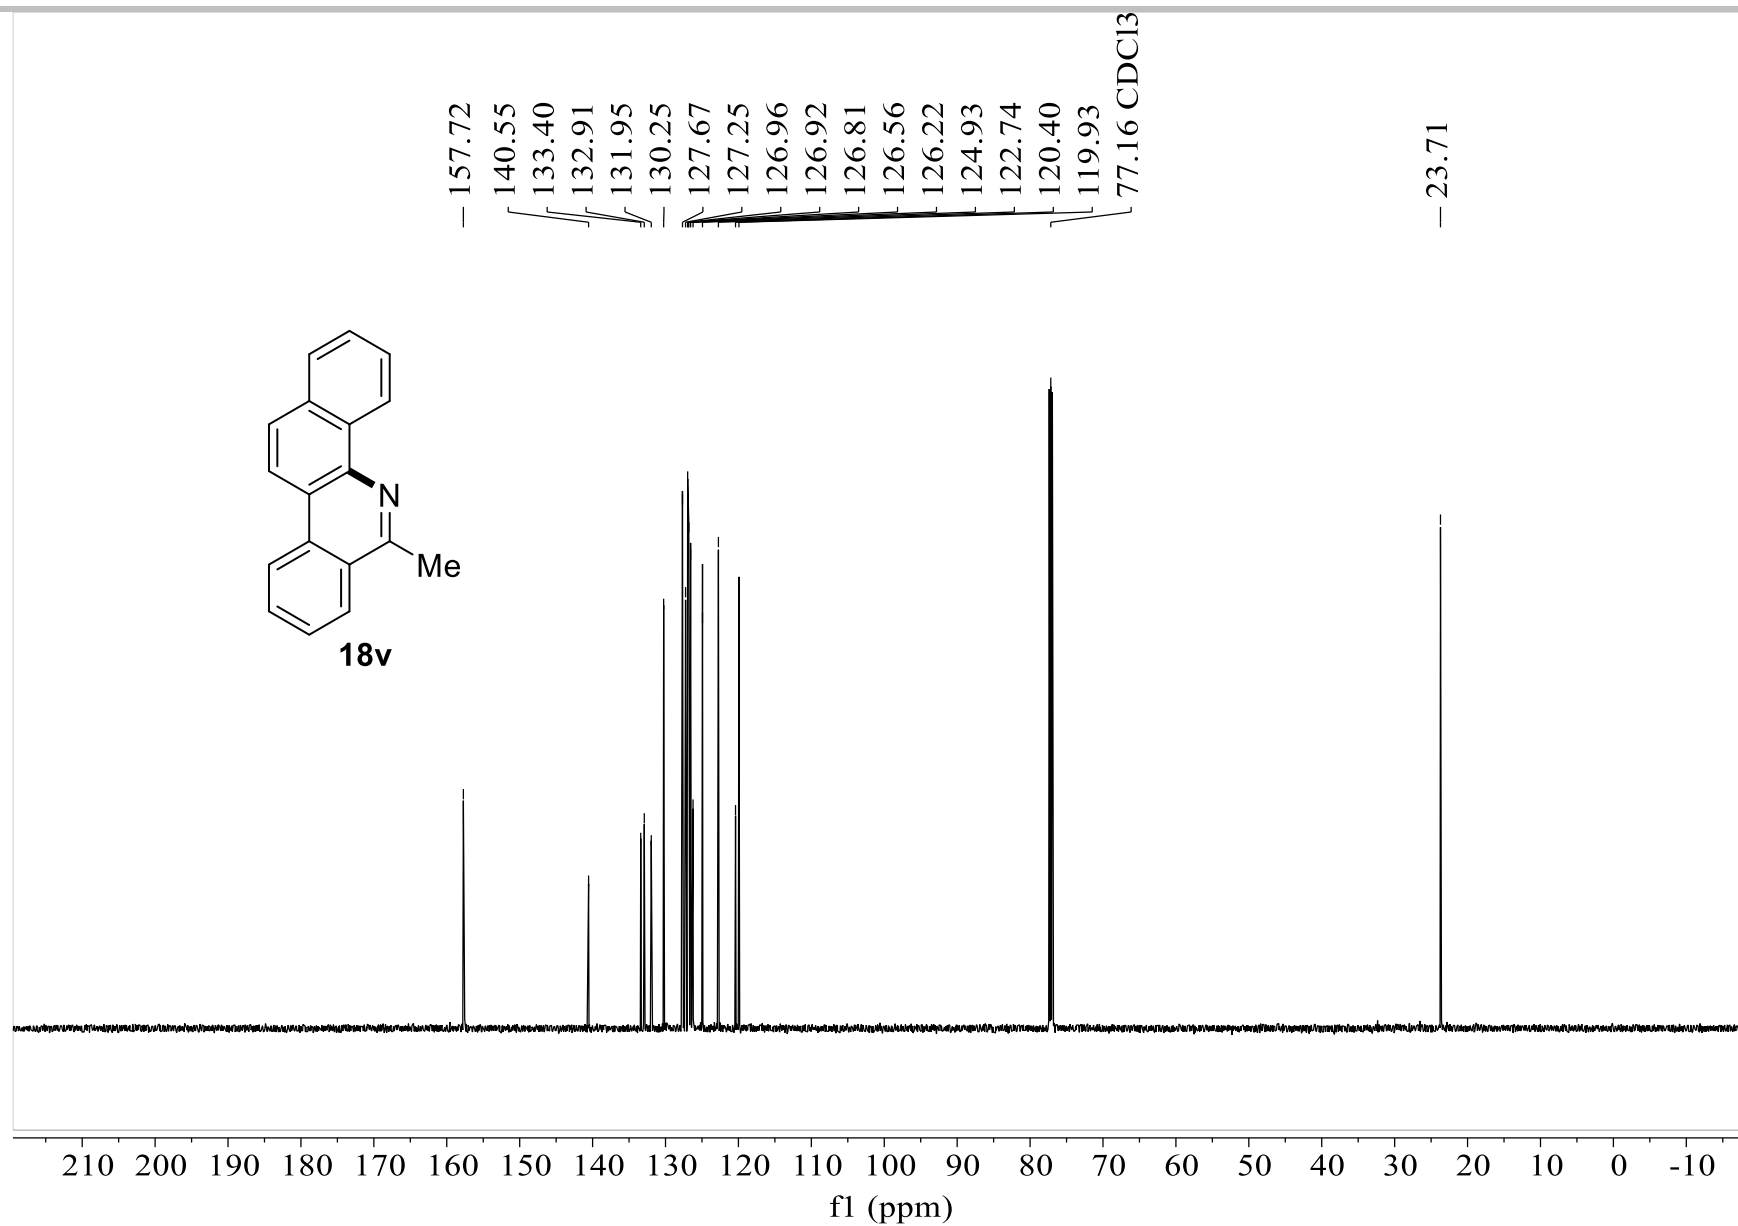

# SUPPORTING INFORMATION

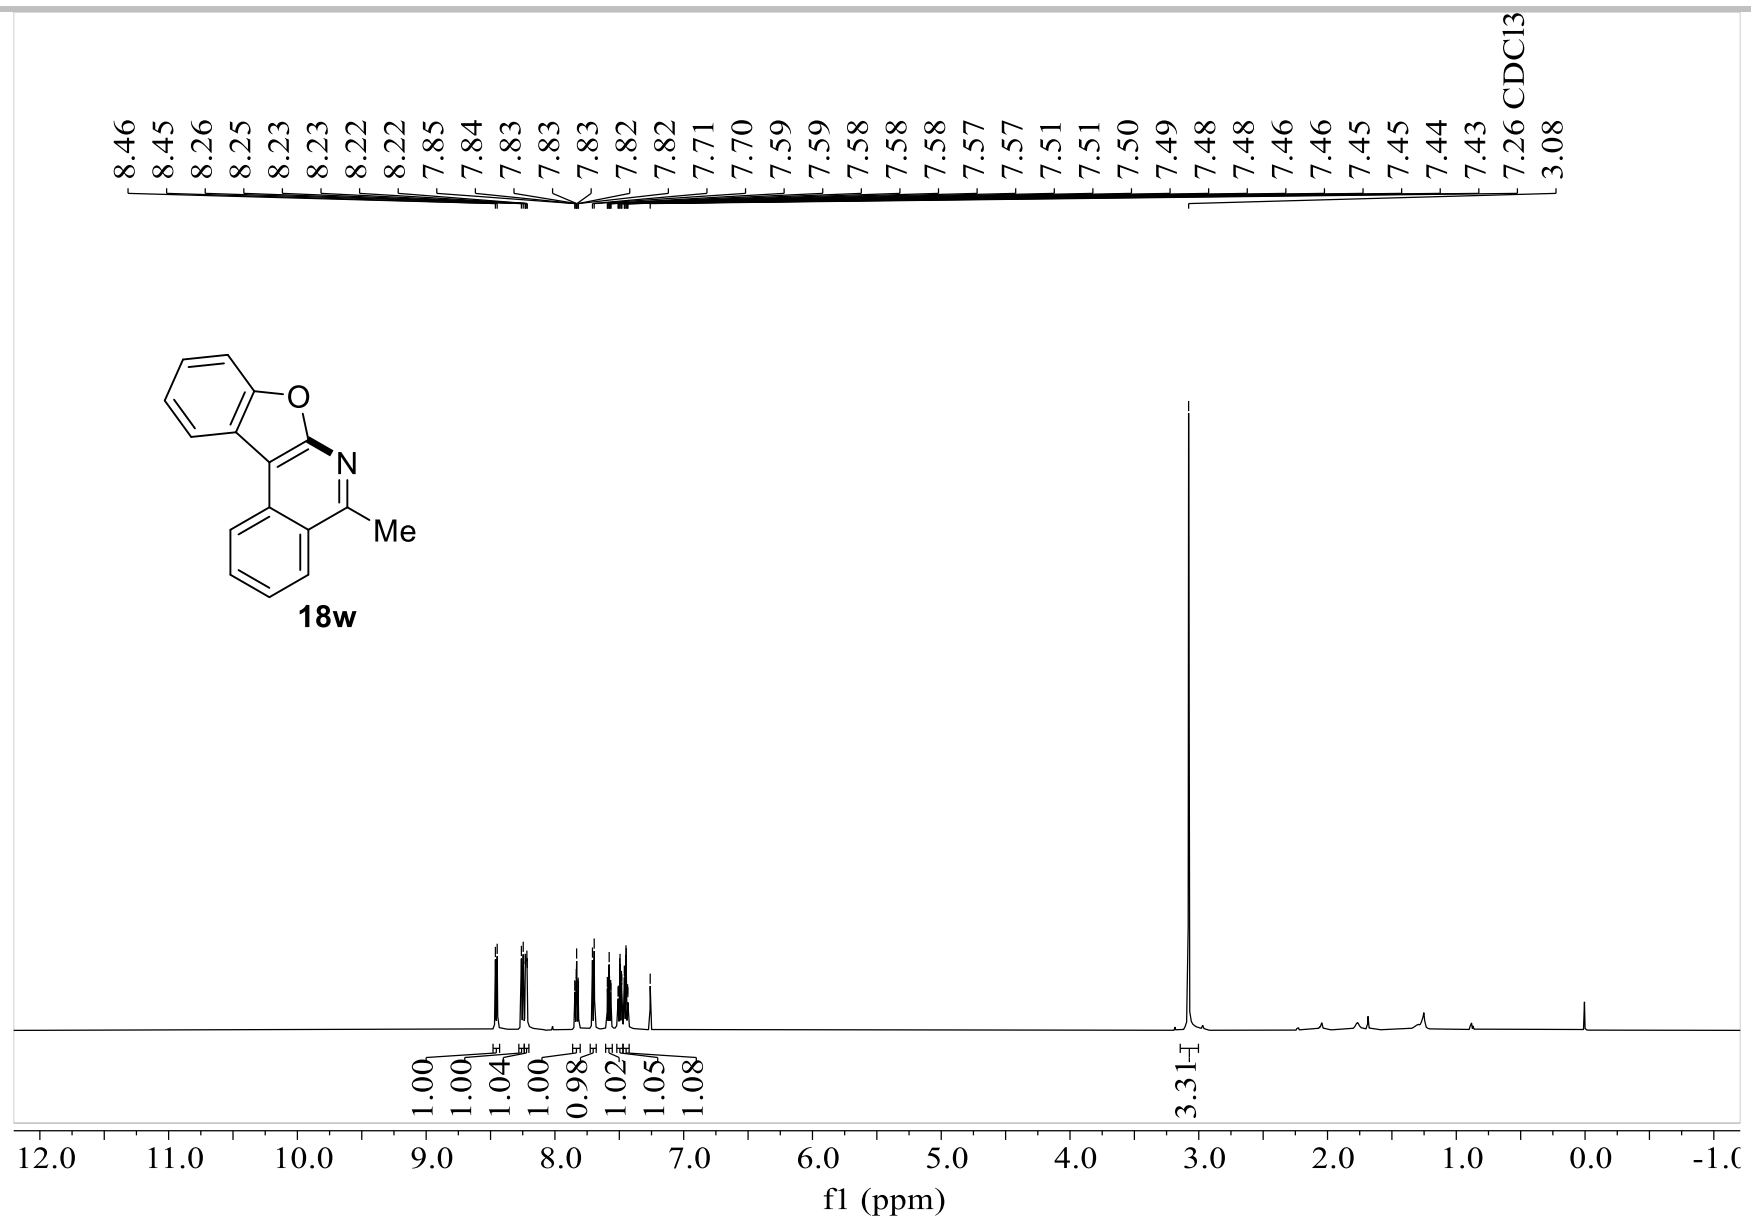

# SUPPORTING INFORMATION

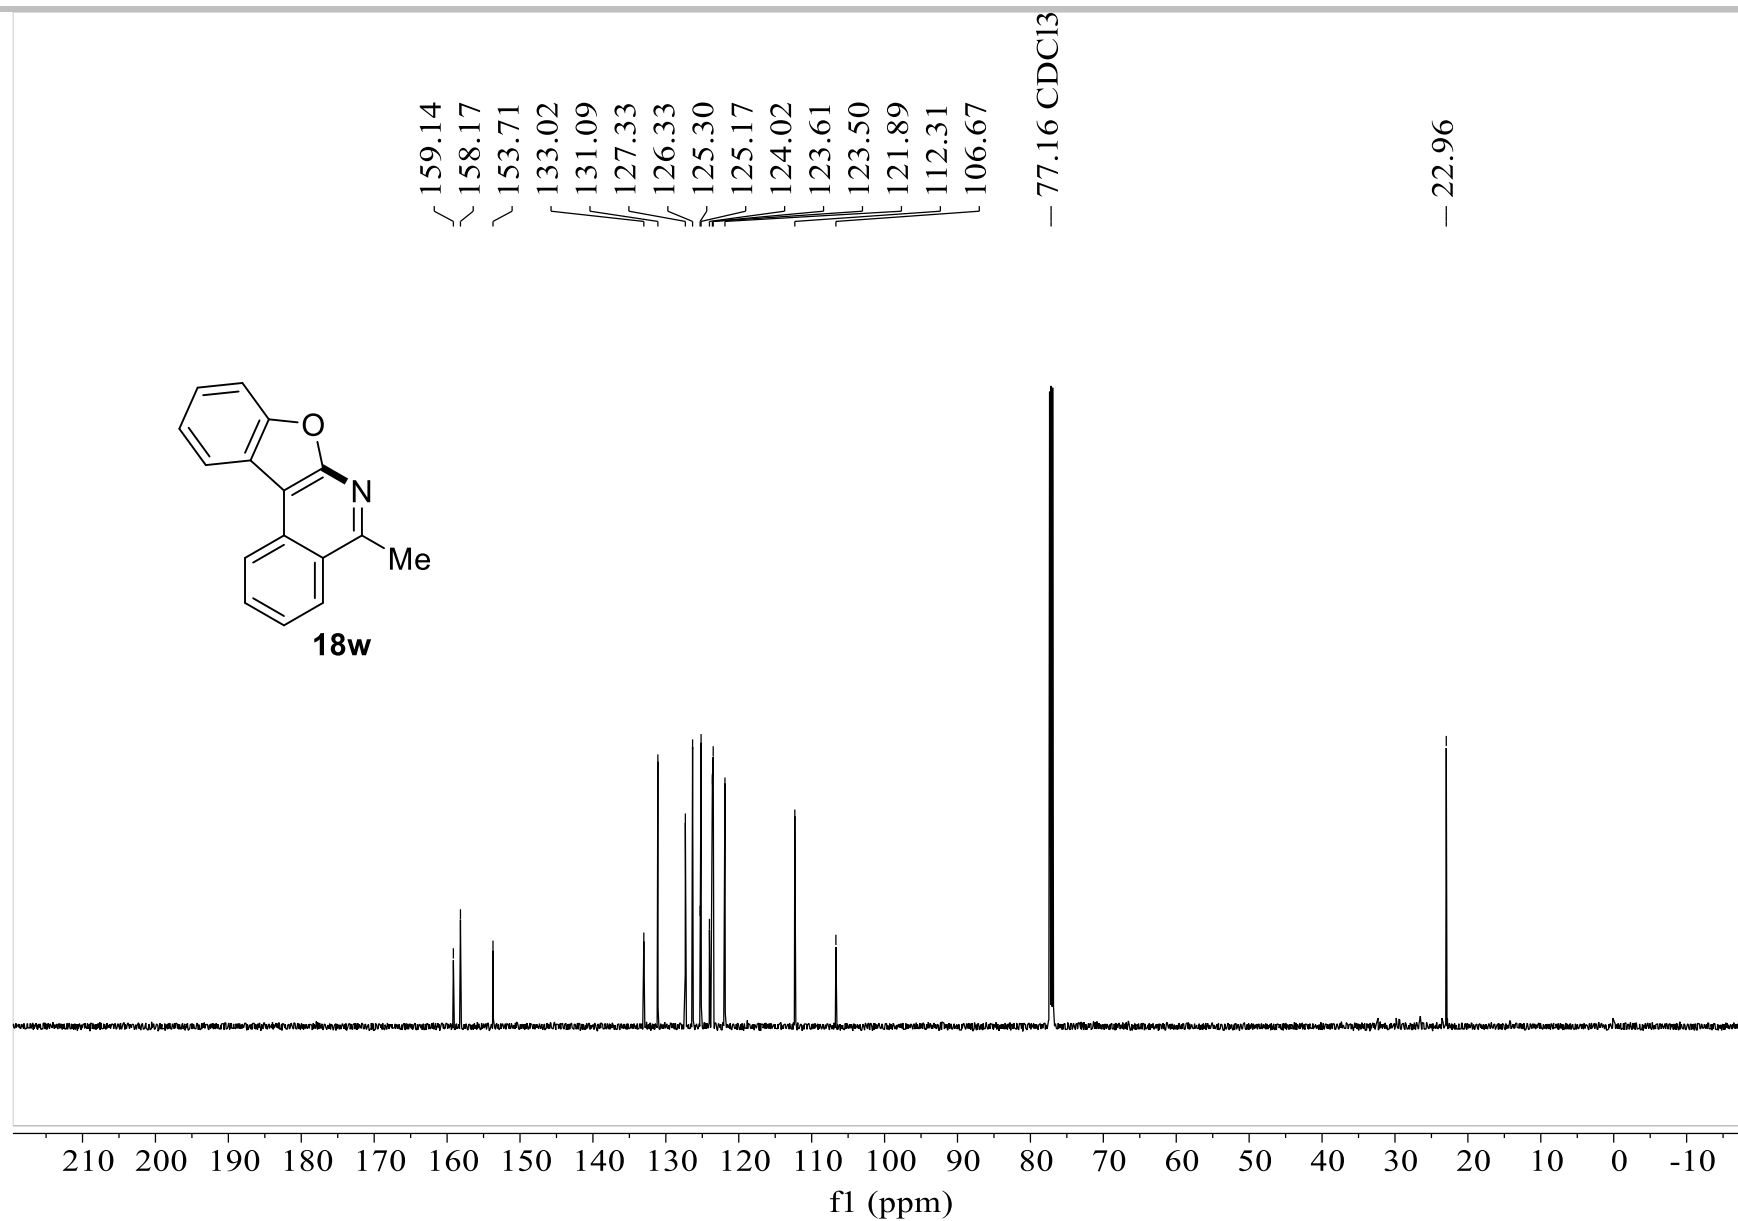

# SUPPORTING INFORMATION

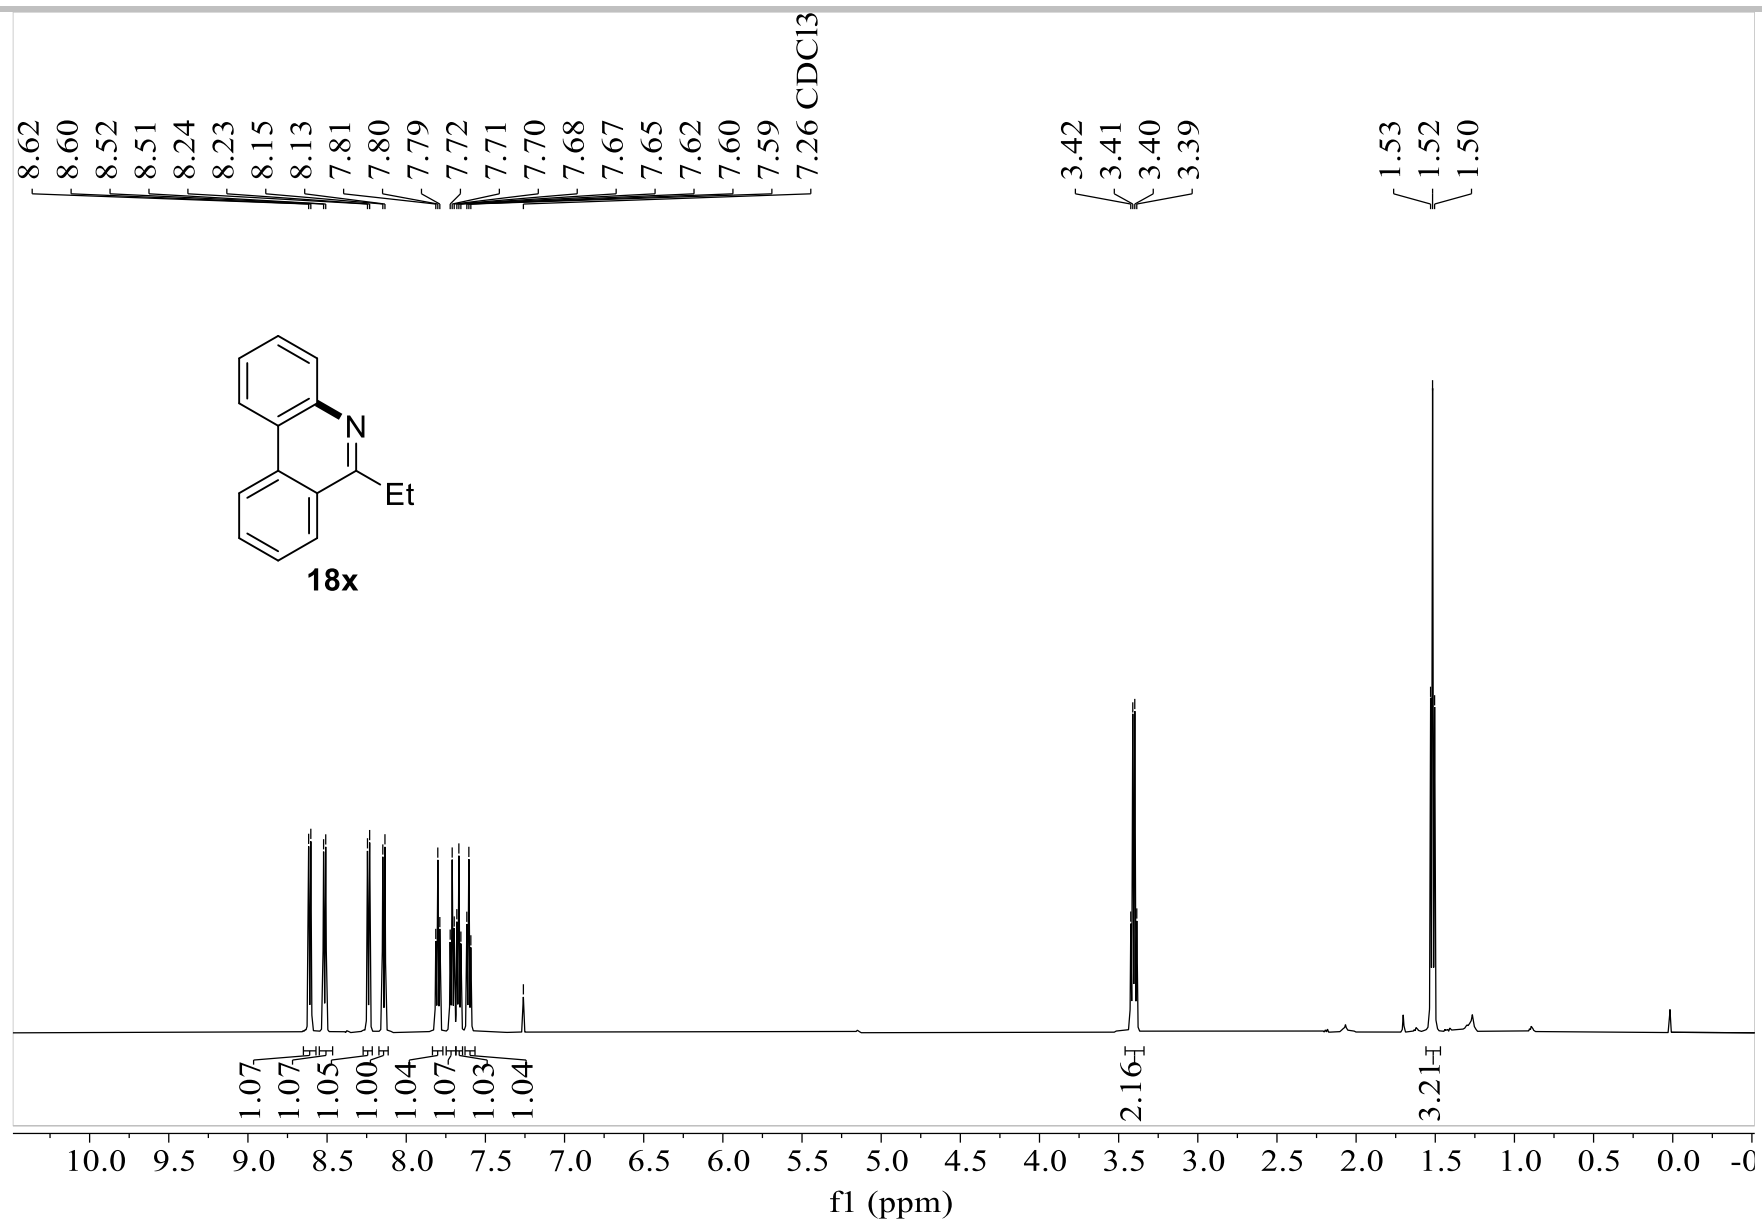



SUPPORTING INFORMATION

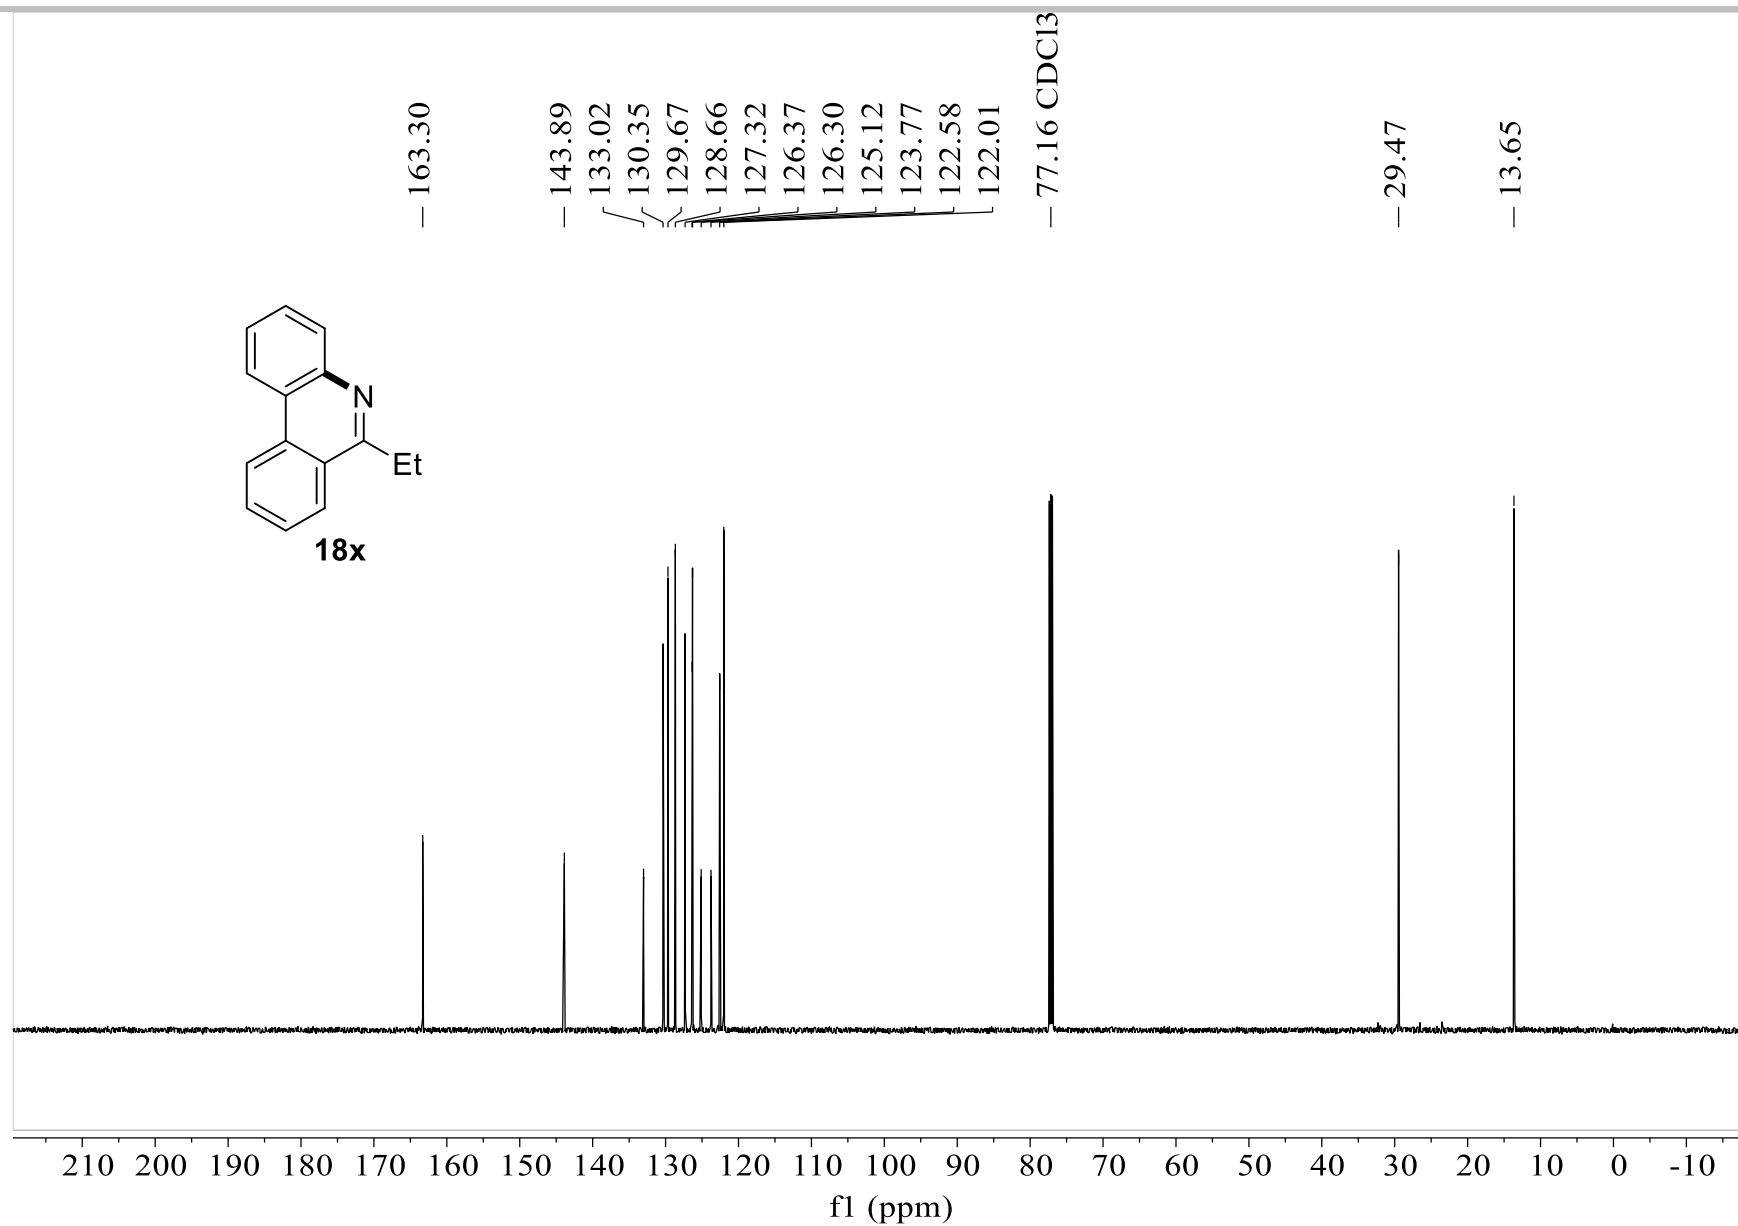

# SUPPORTING INFORMATION

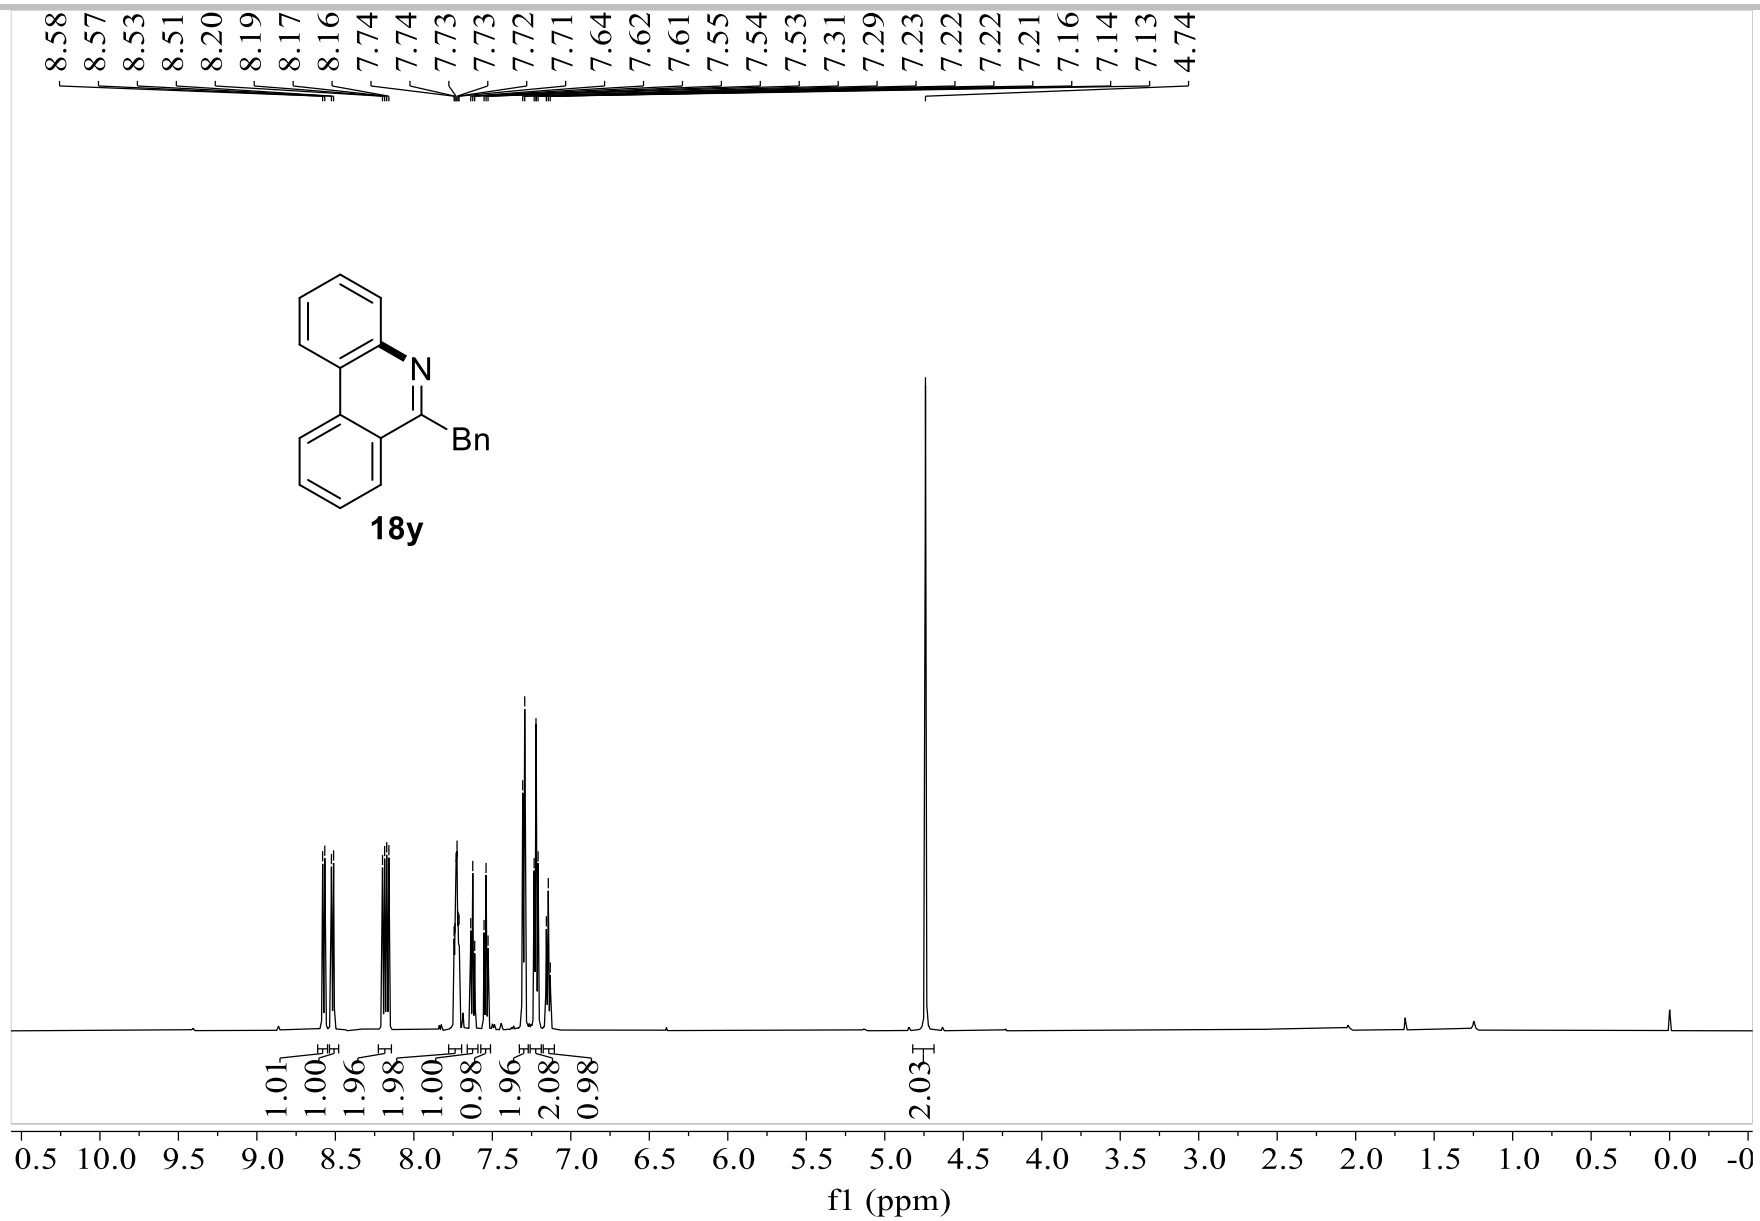

SUPPORTING INFORMATION

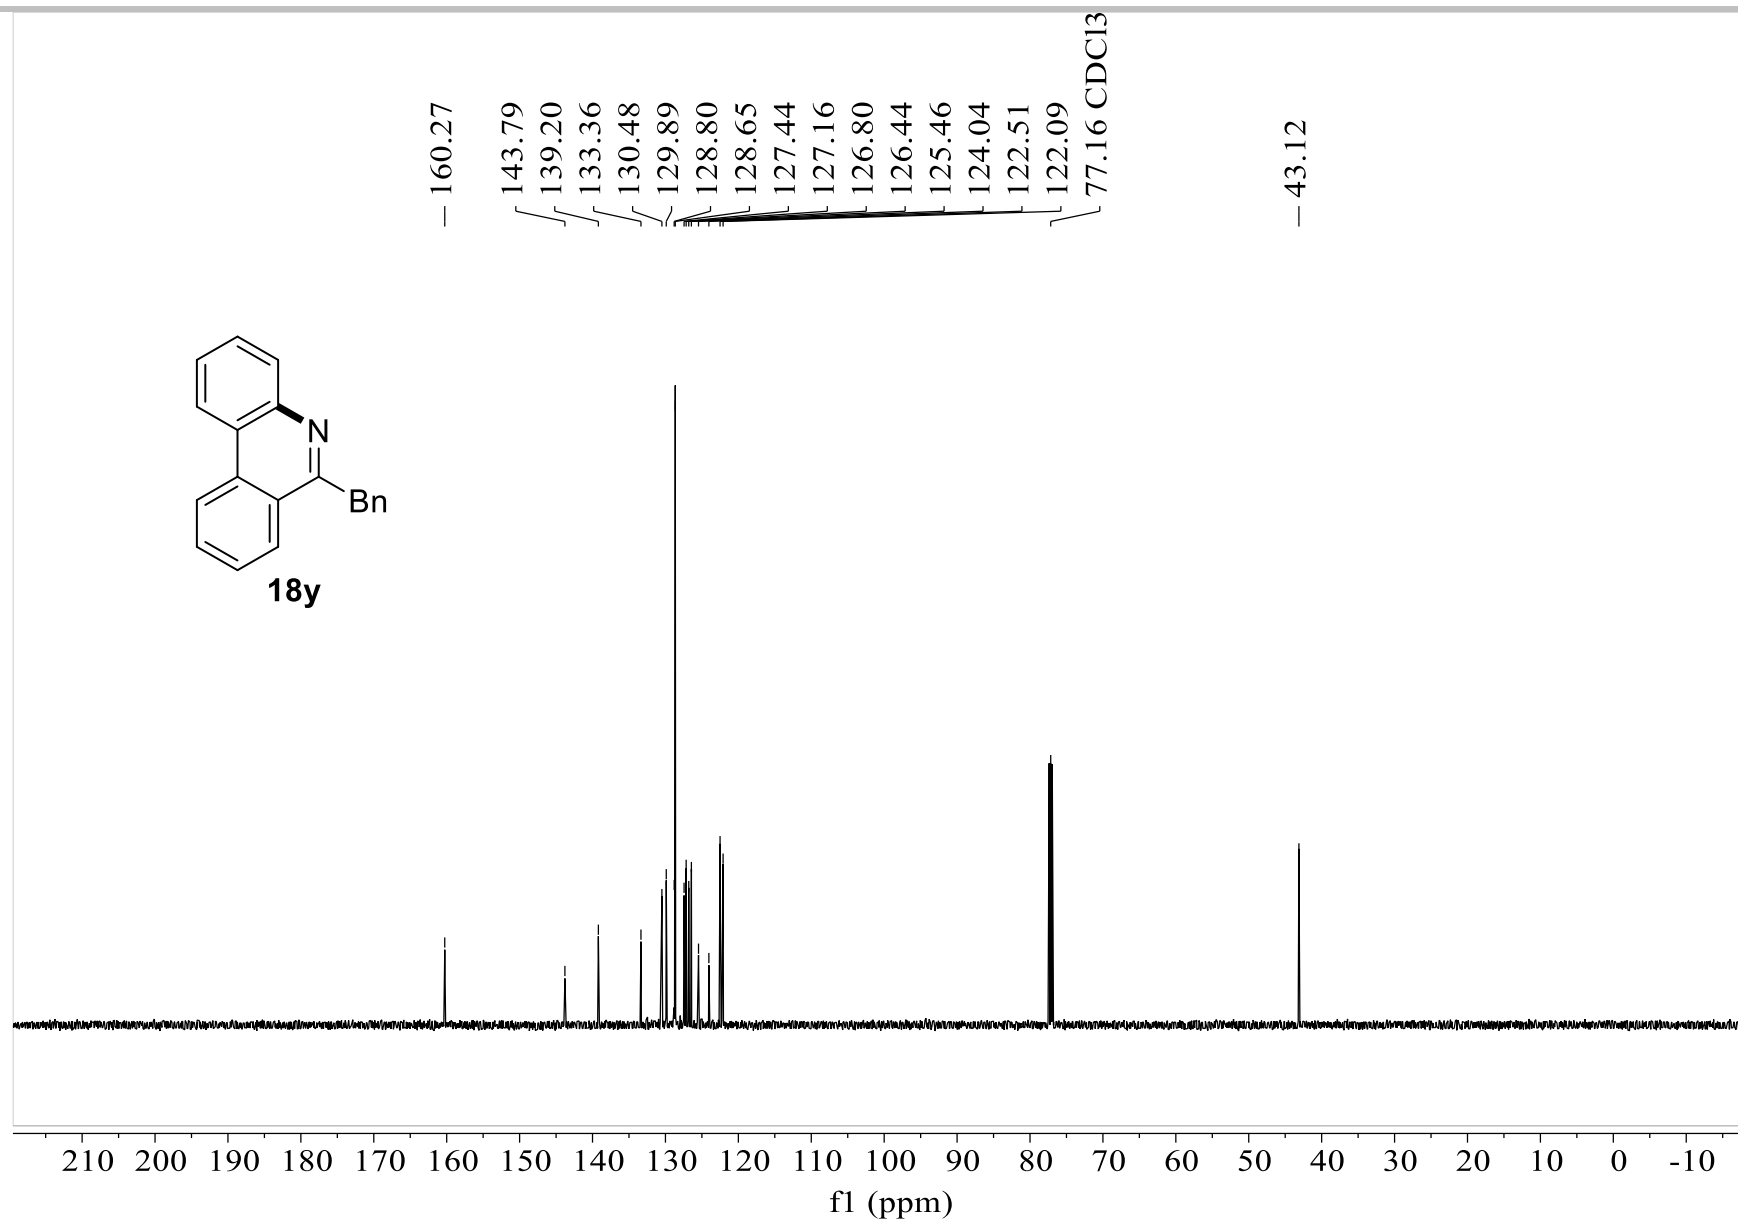

SUPPORTING INFORMATION

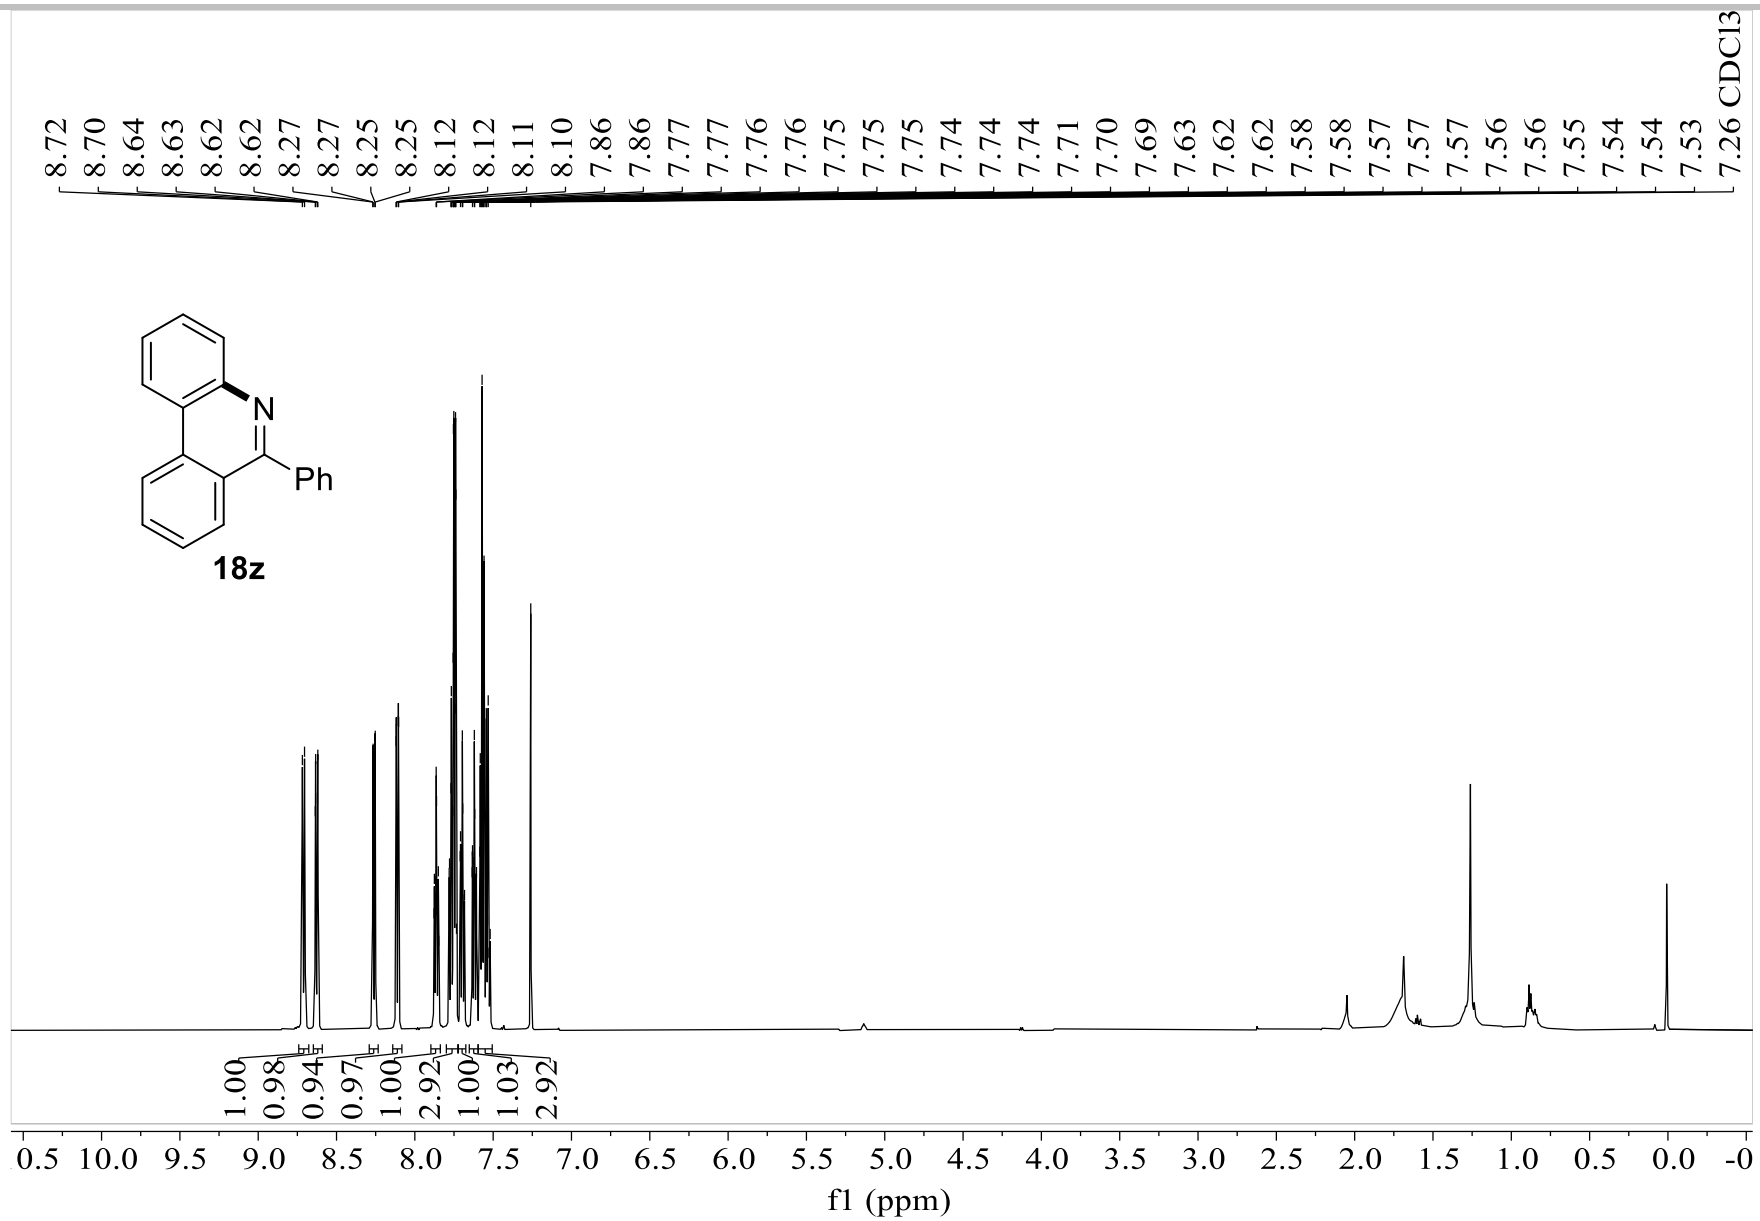

# SUPPORTING INFORMATION

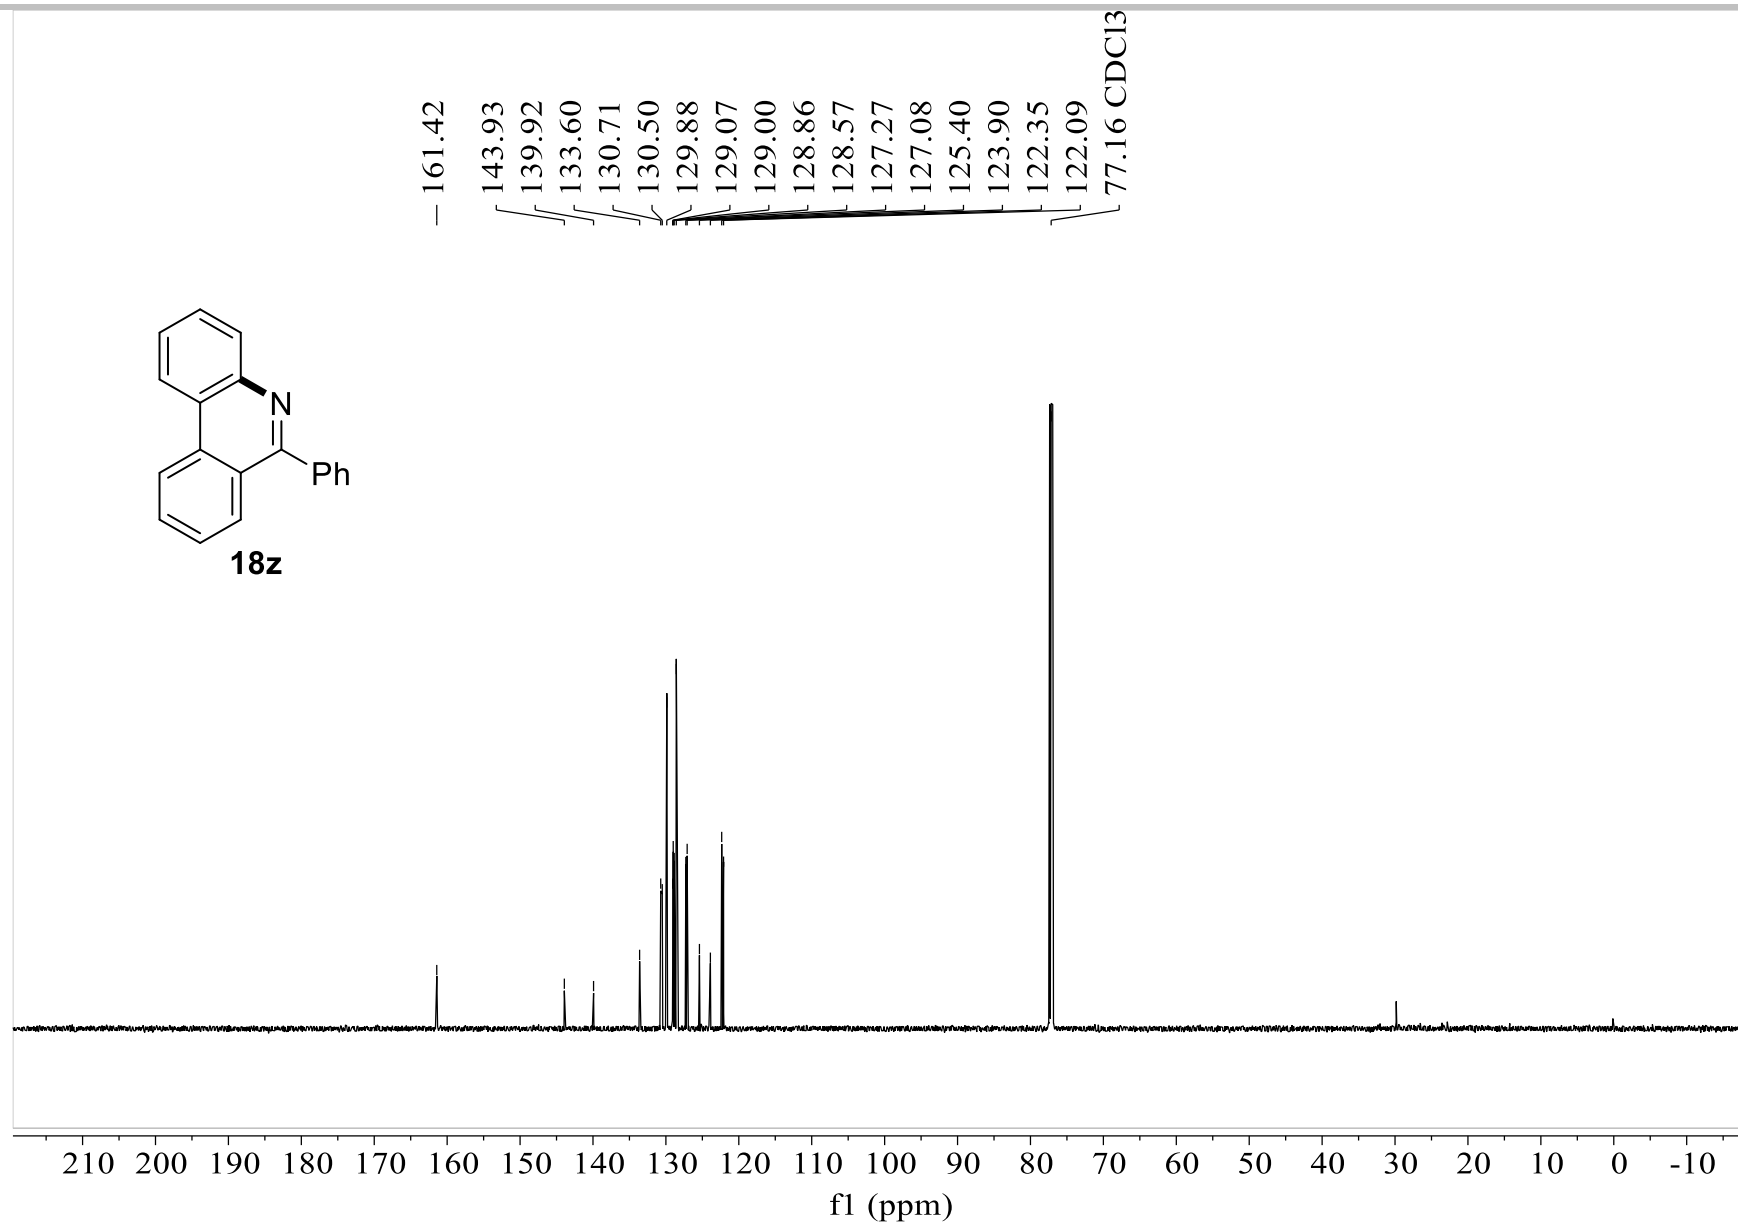

SUPPORTING INFORMATION

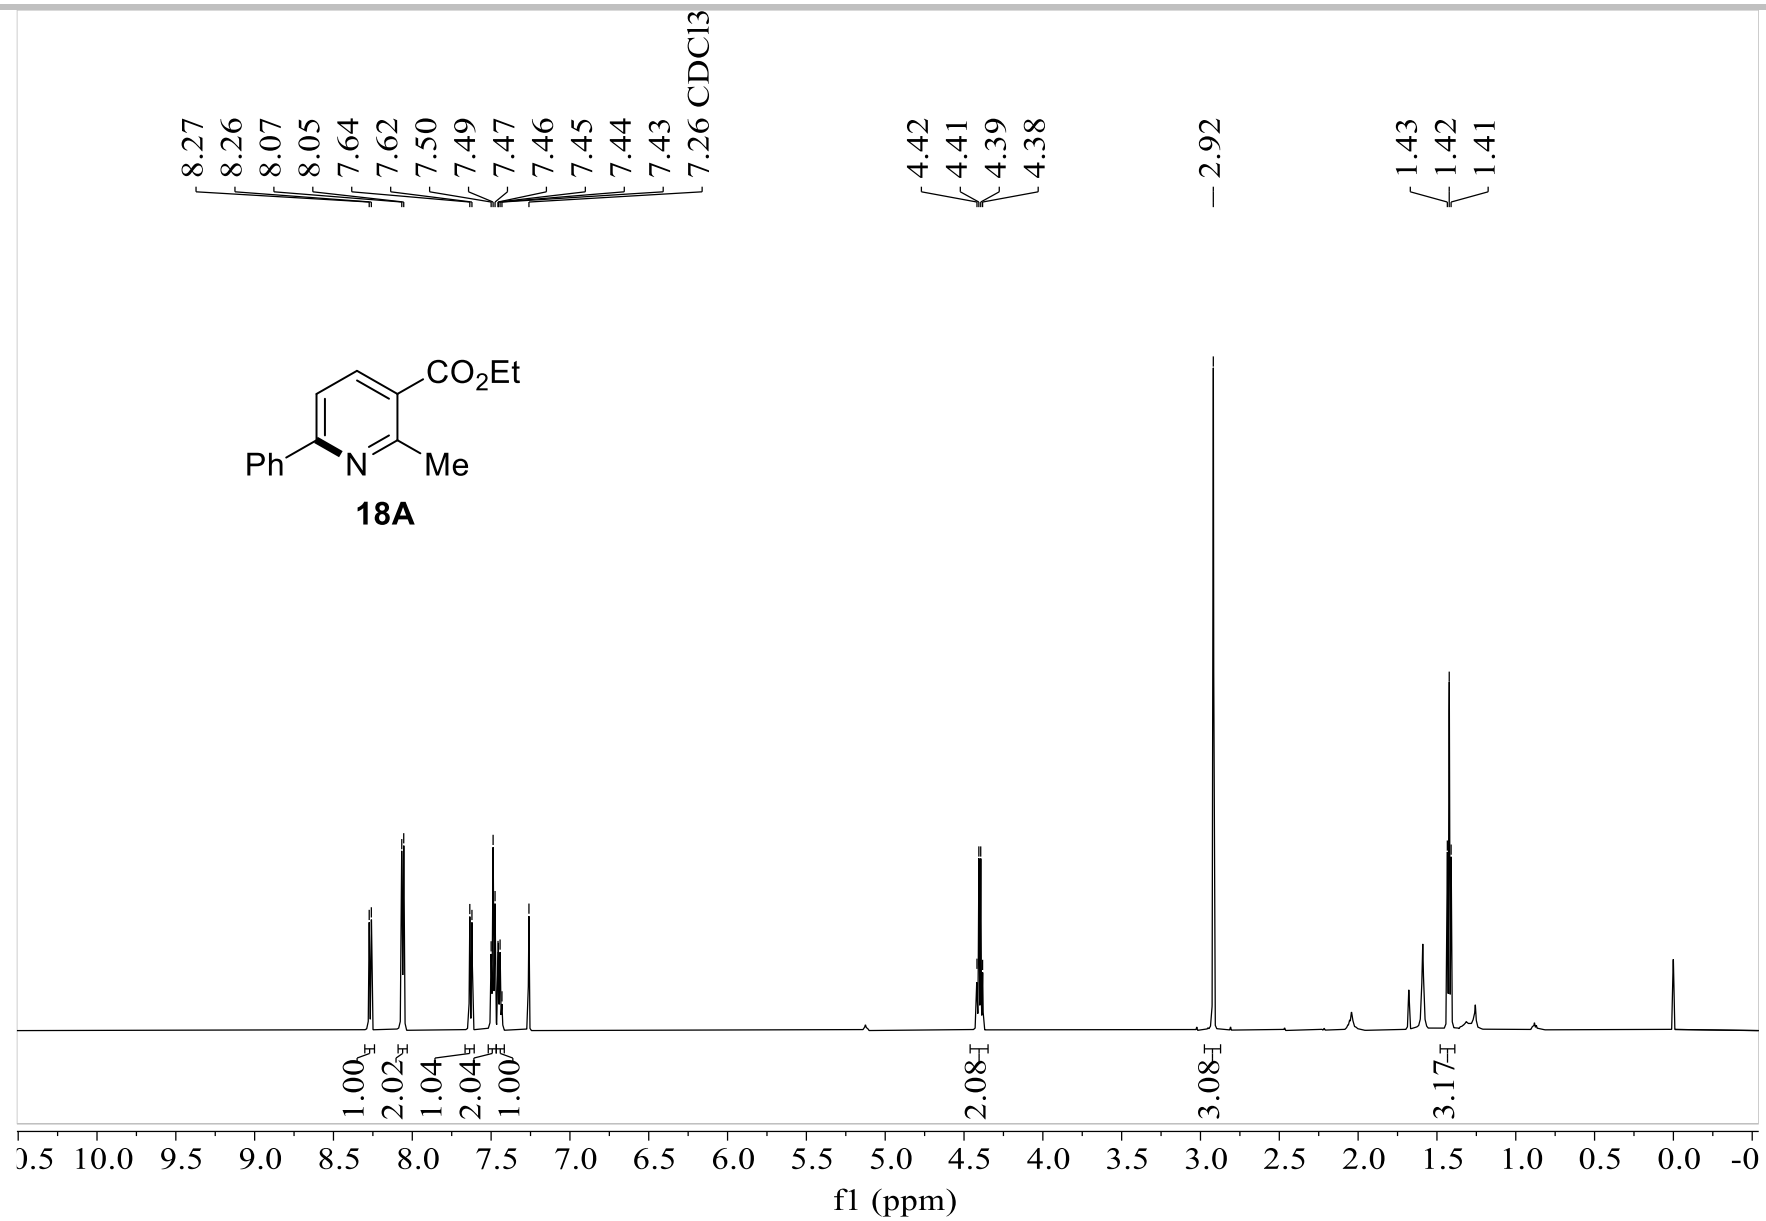

SUPPORTING INFORMATION

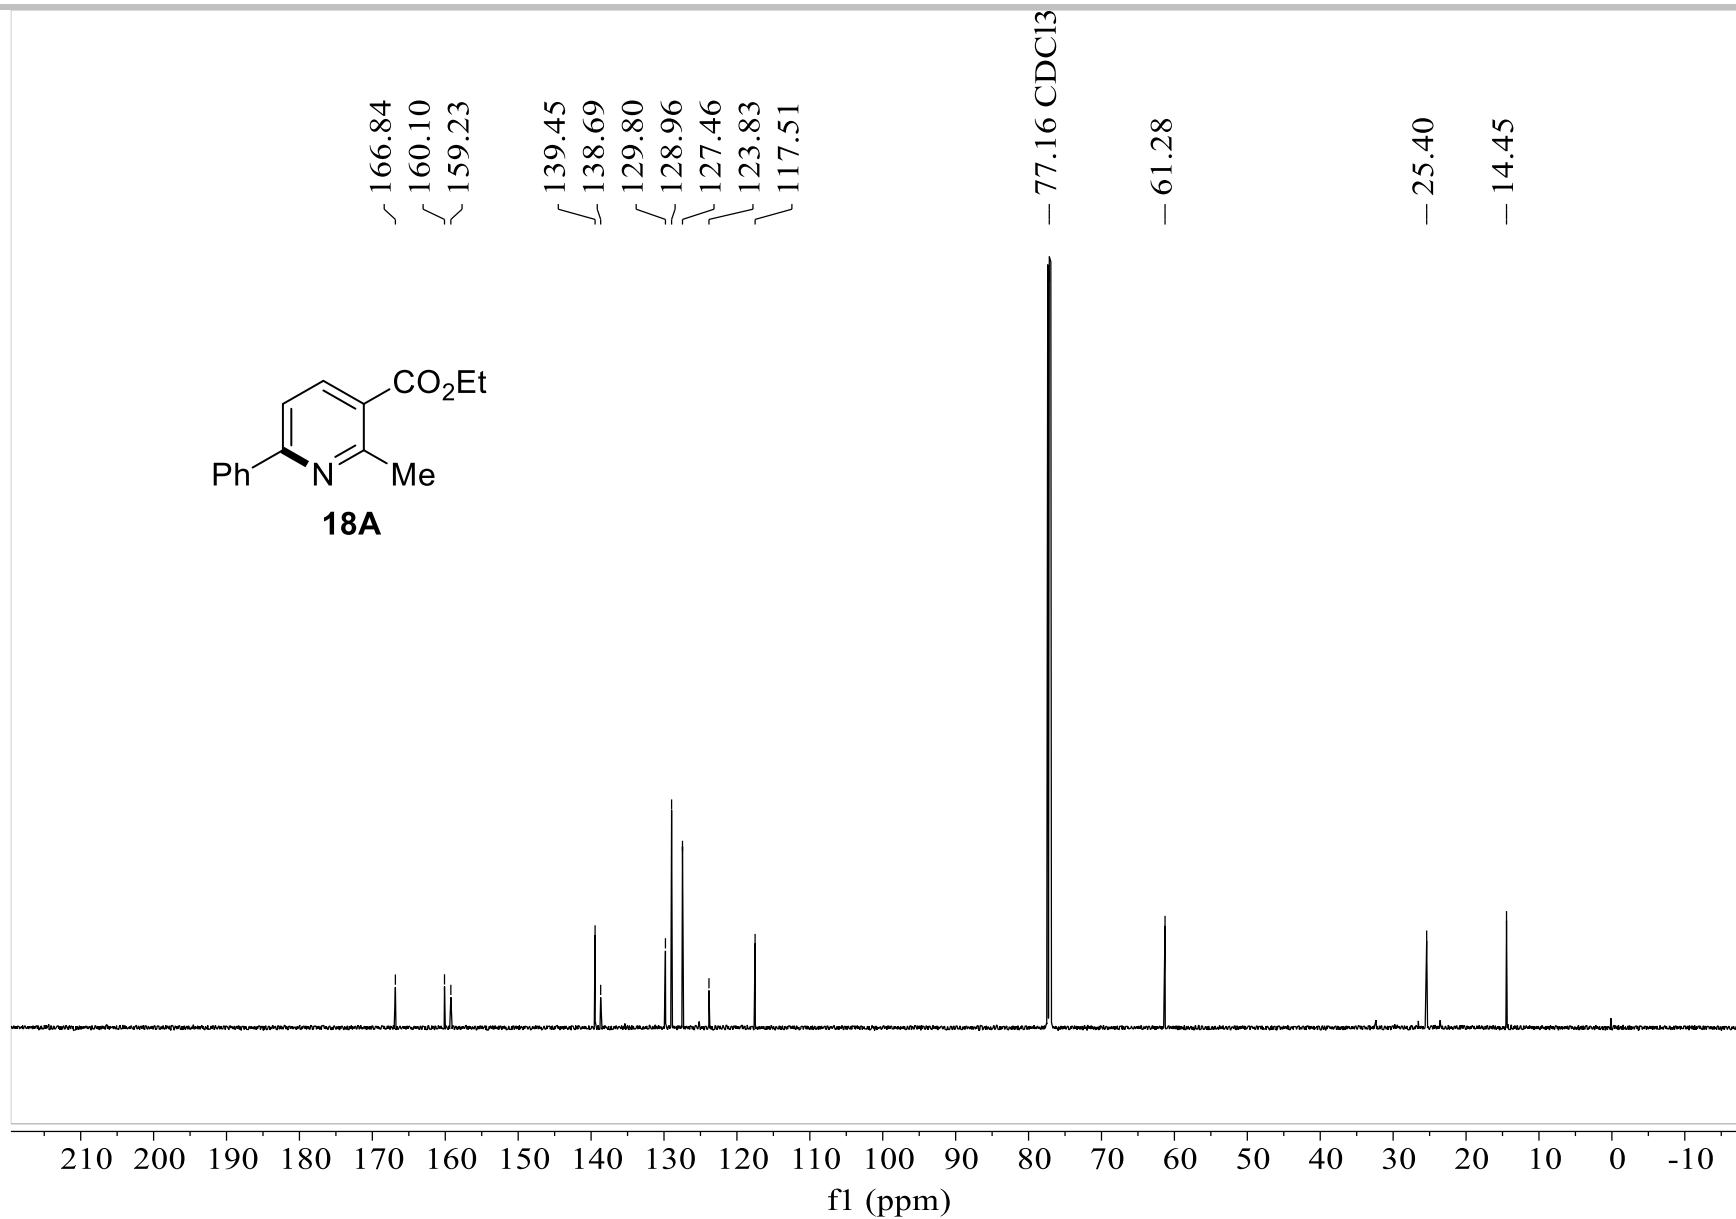

SUPPORTING INFORMATION

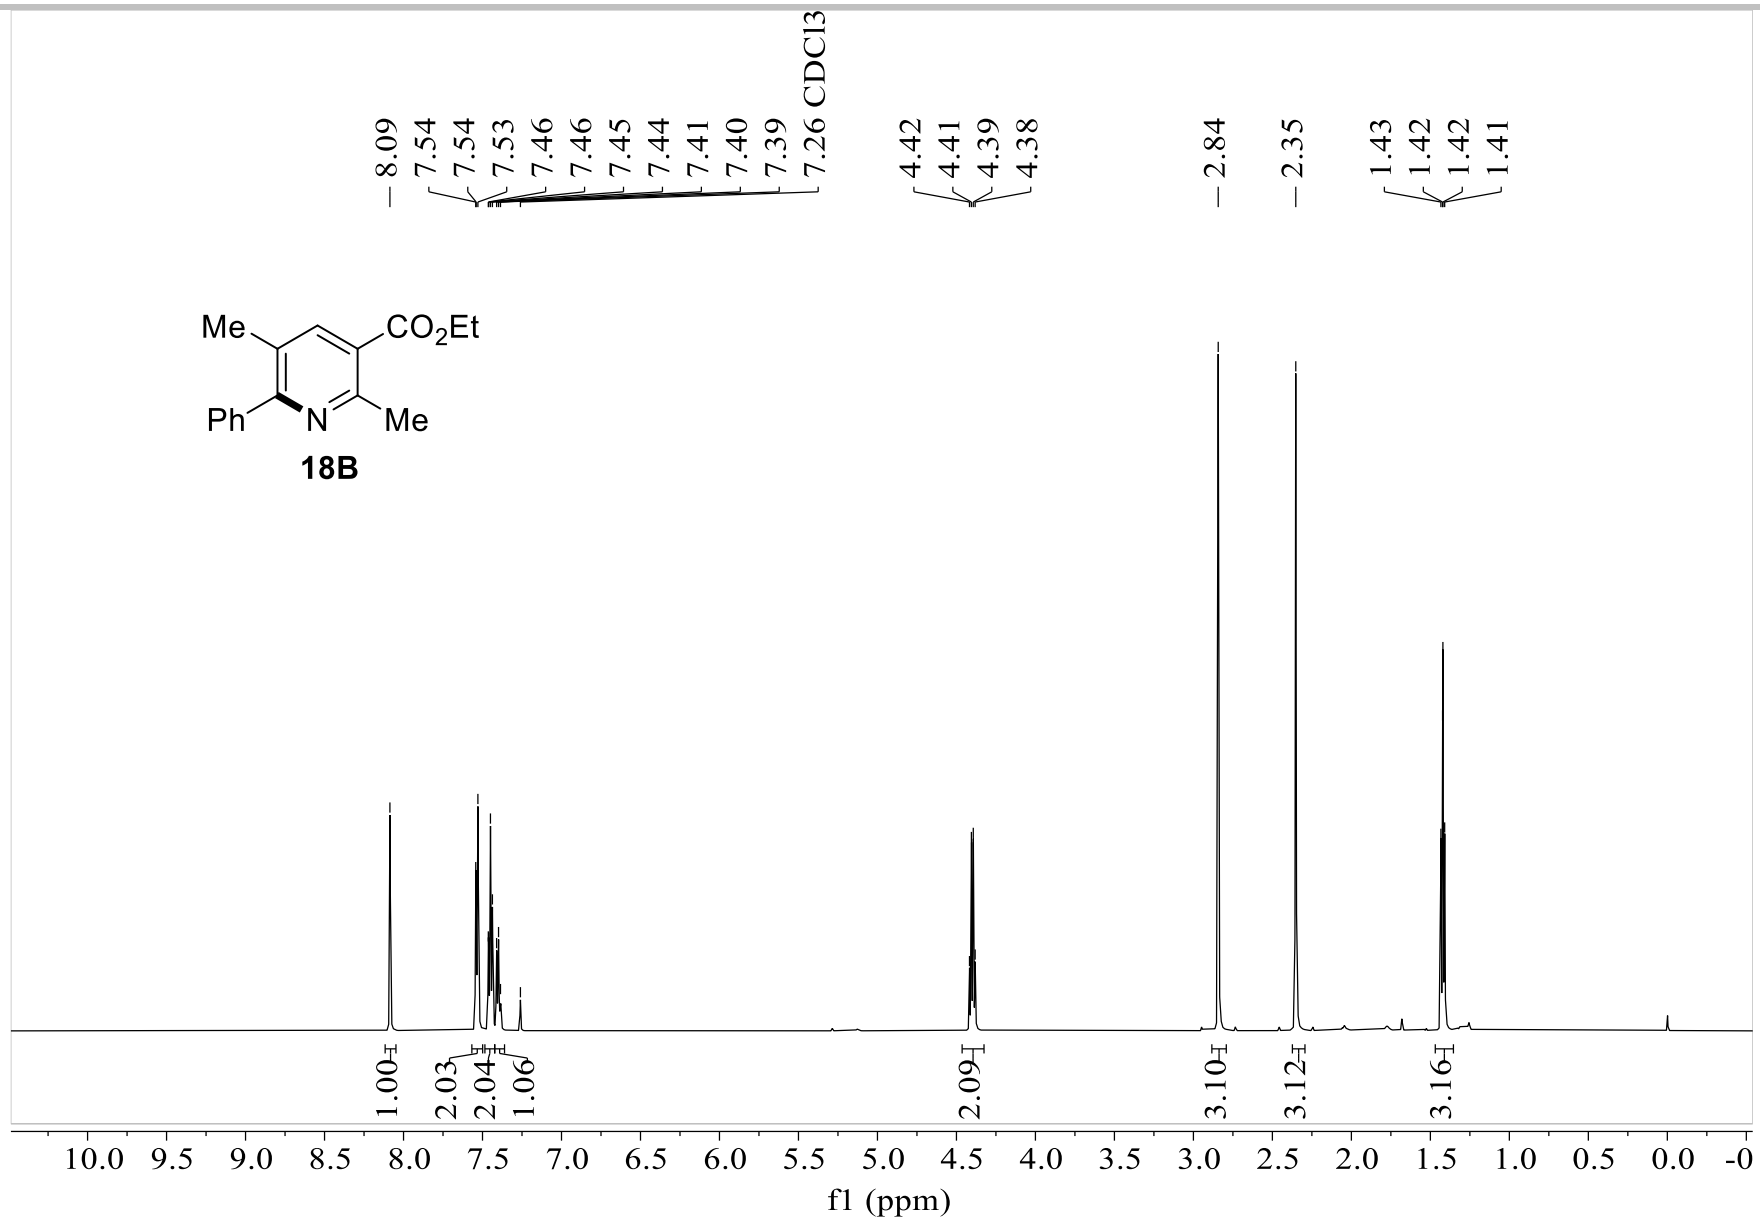



SUPPORTING INFORMATION

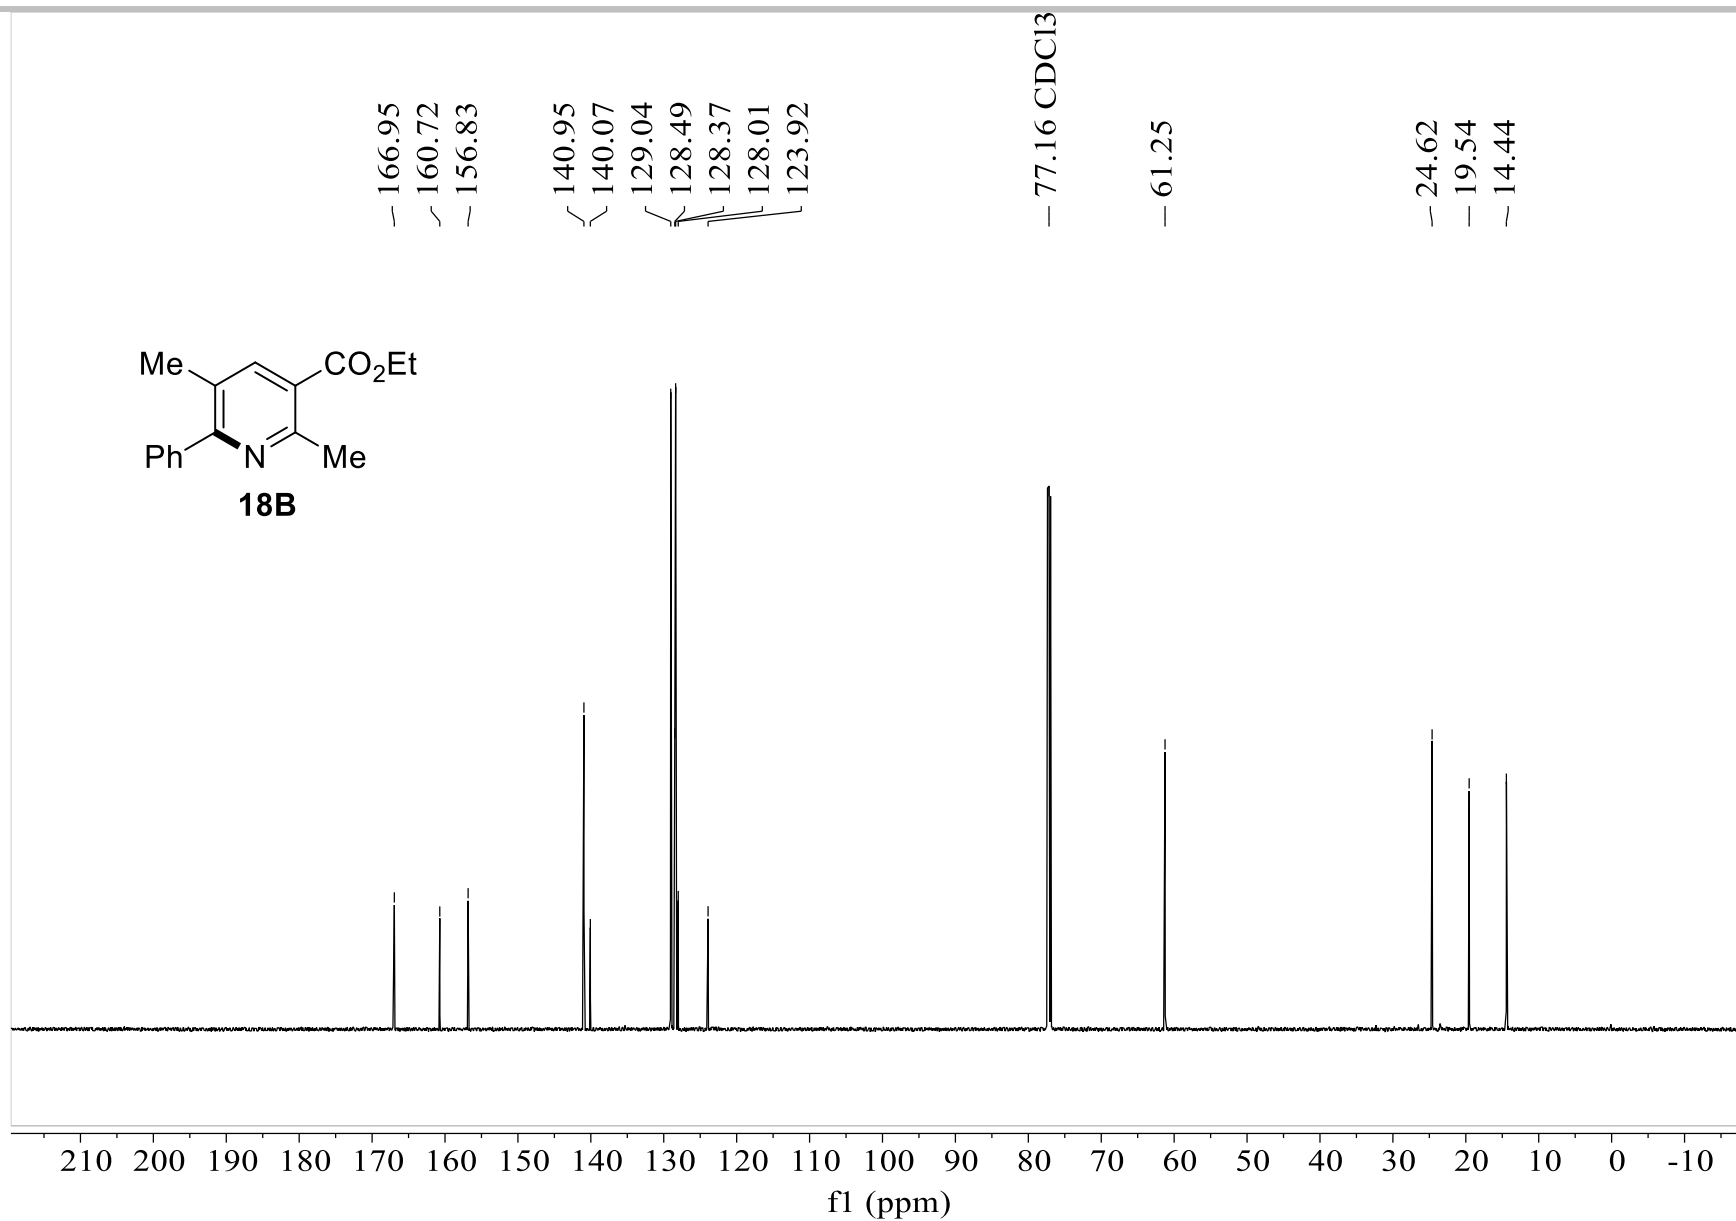

SUPPORTING INFORMATION

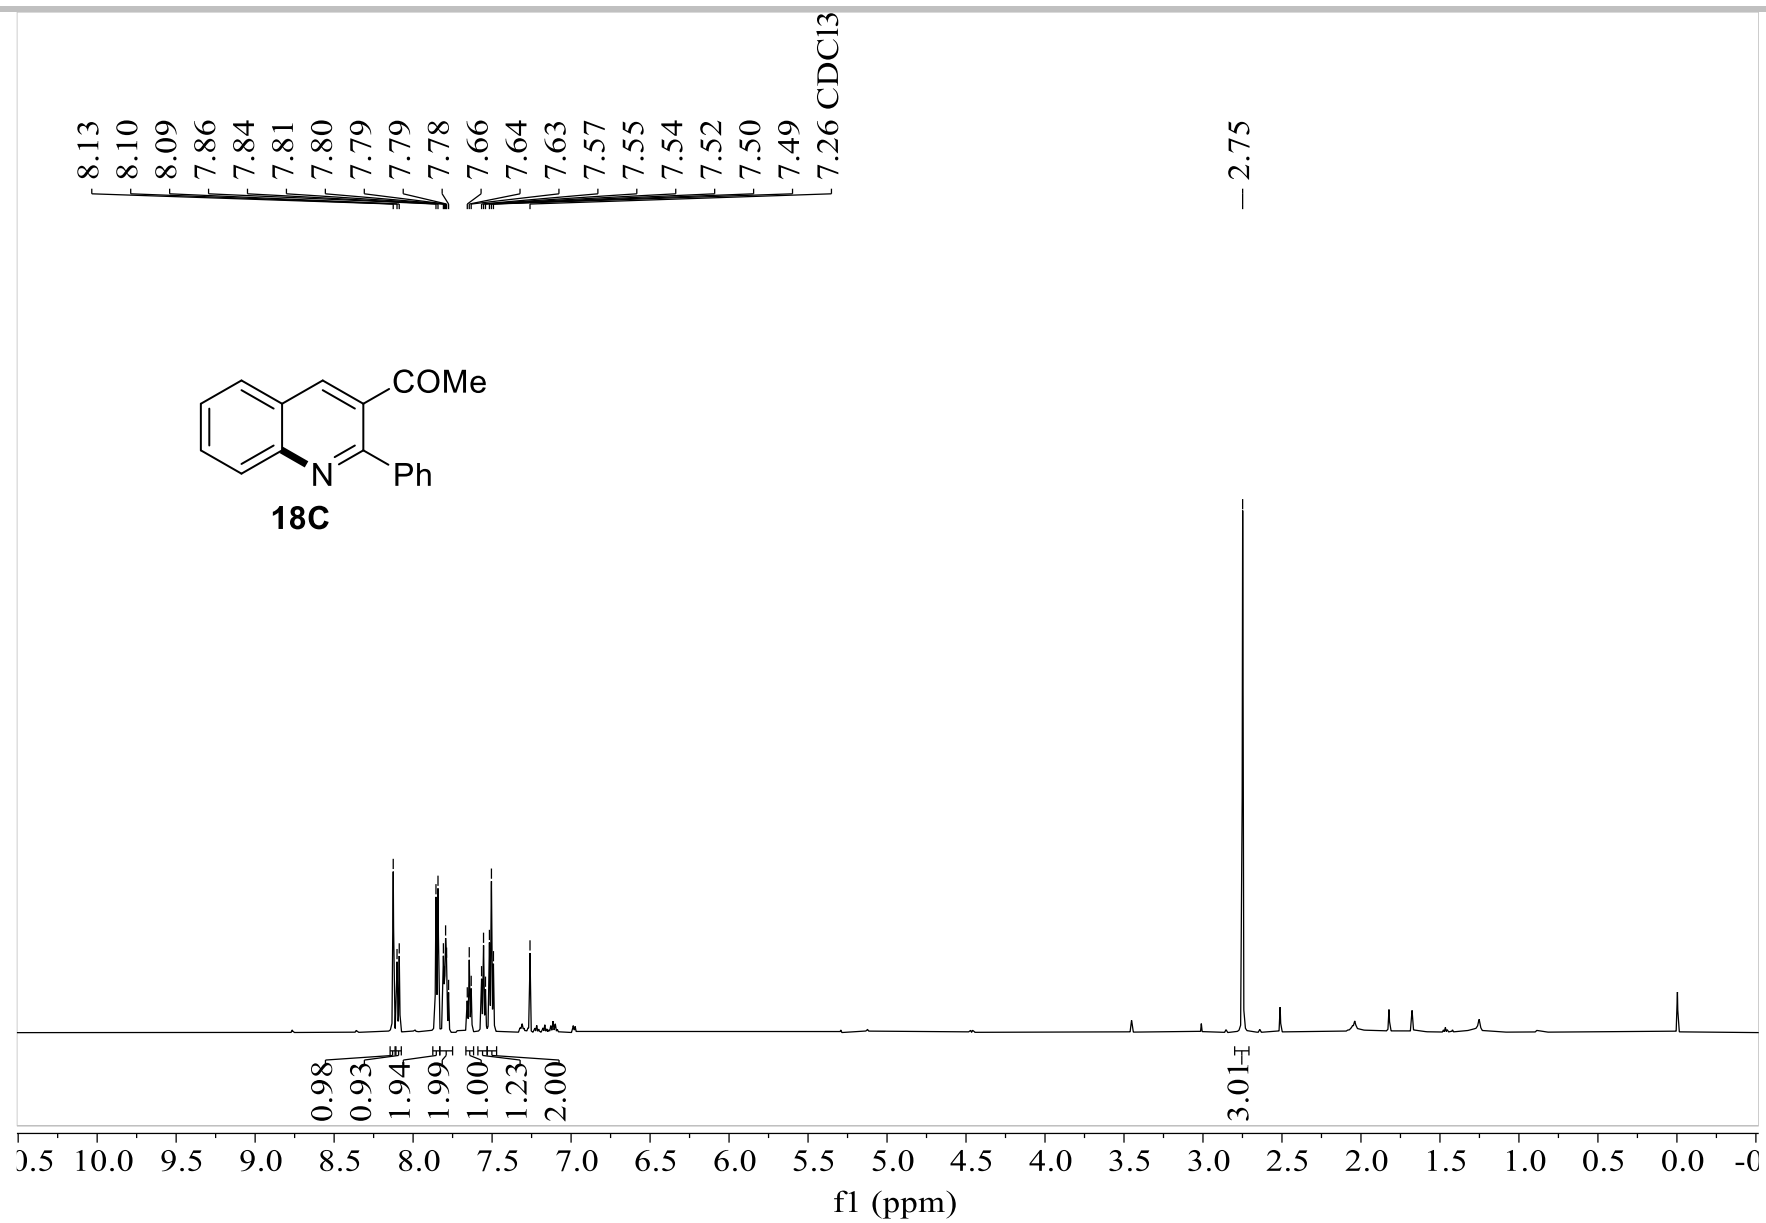

# SUPPORTING INFORMATION

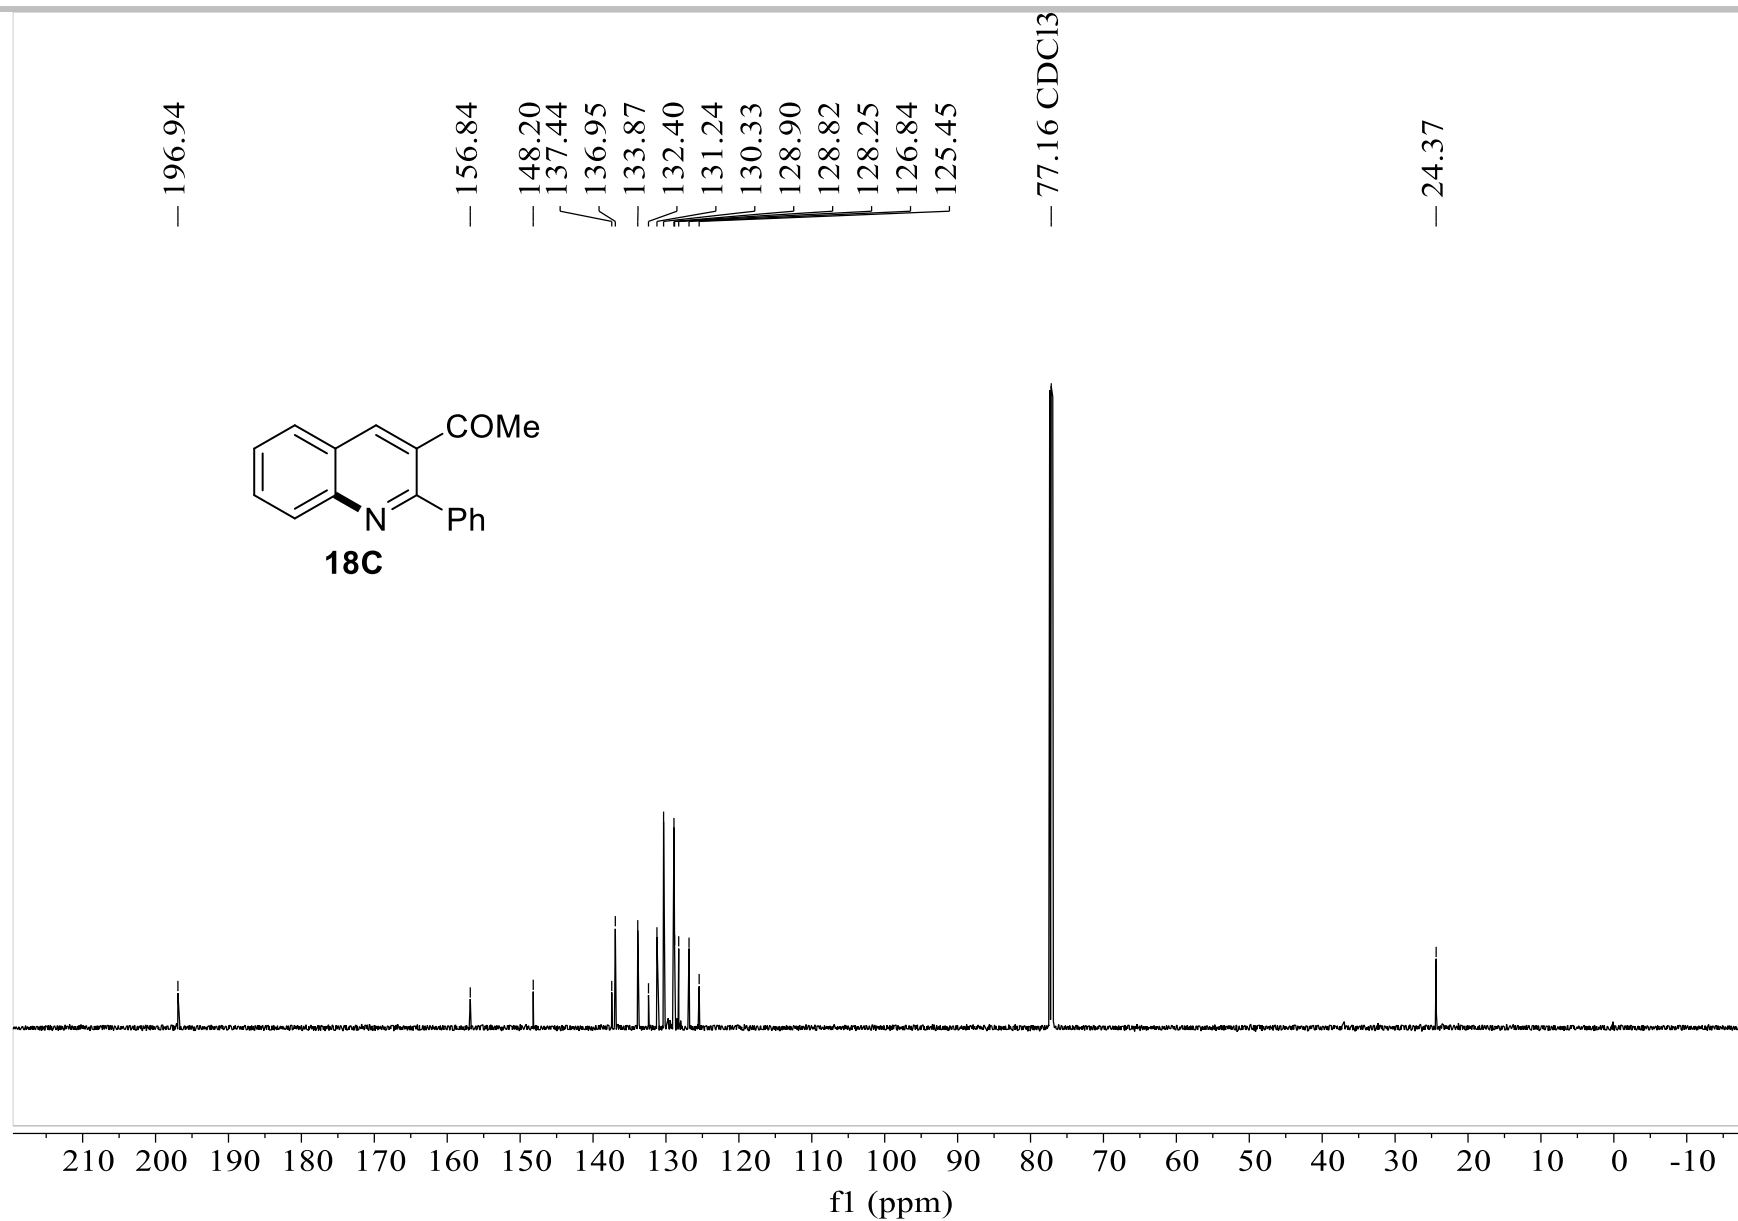

SUPPORTING INFORMATION

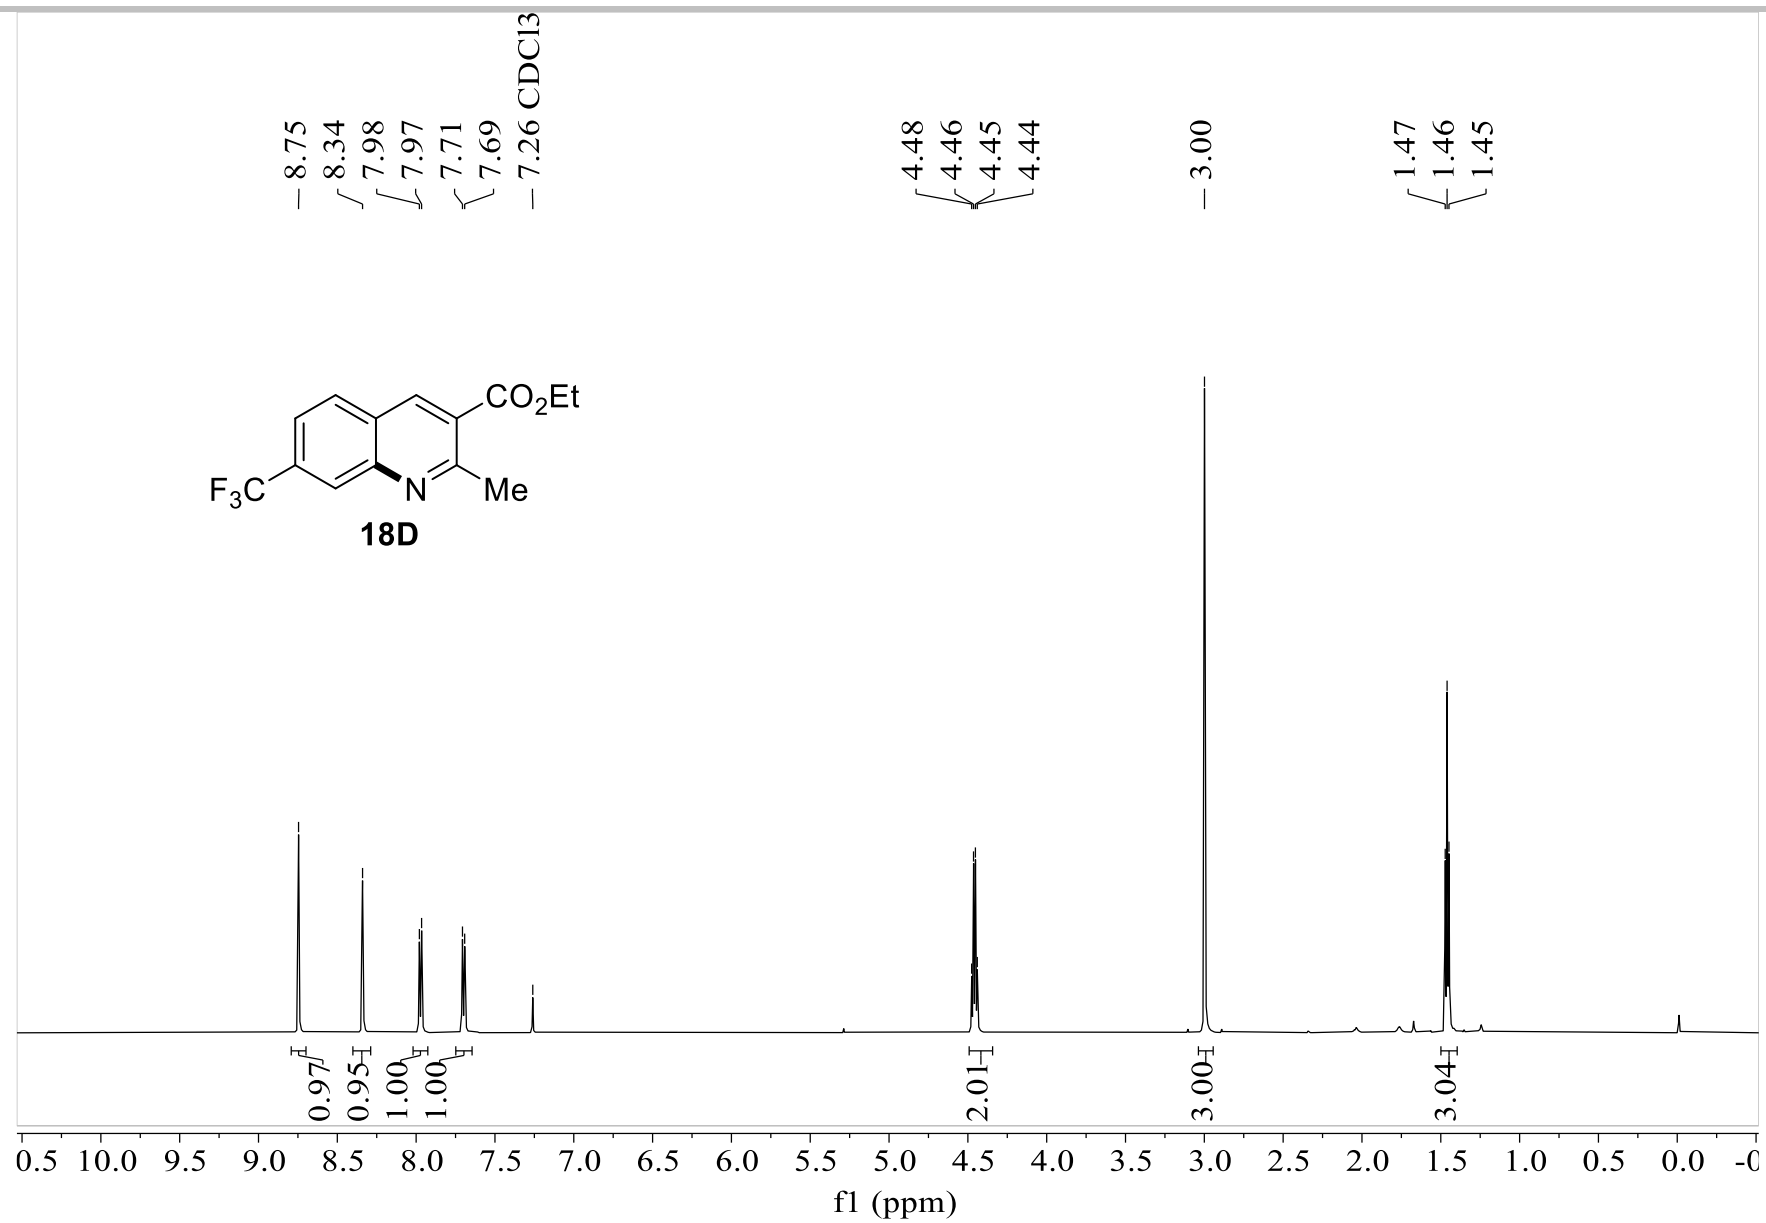

SUPPORTING INFORMATION

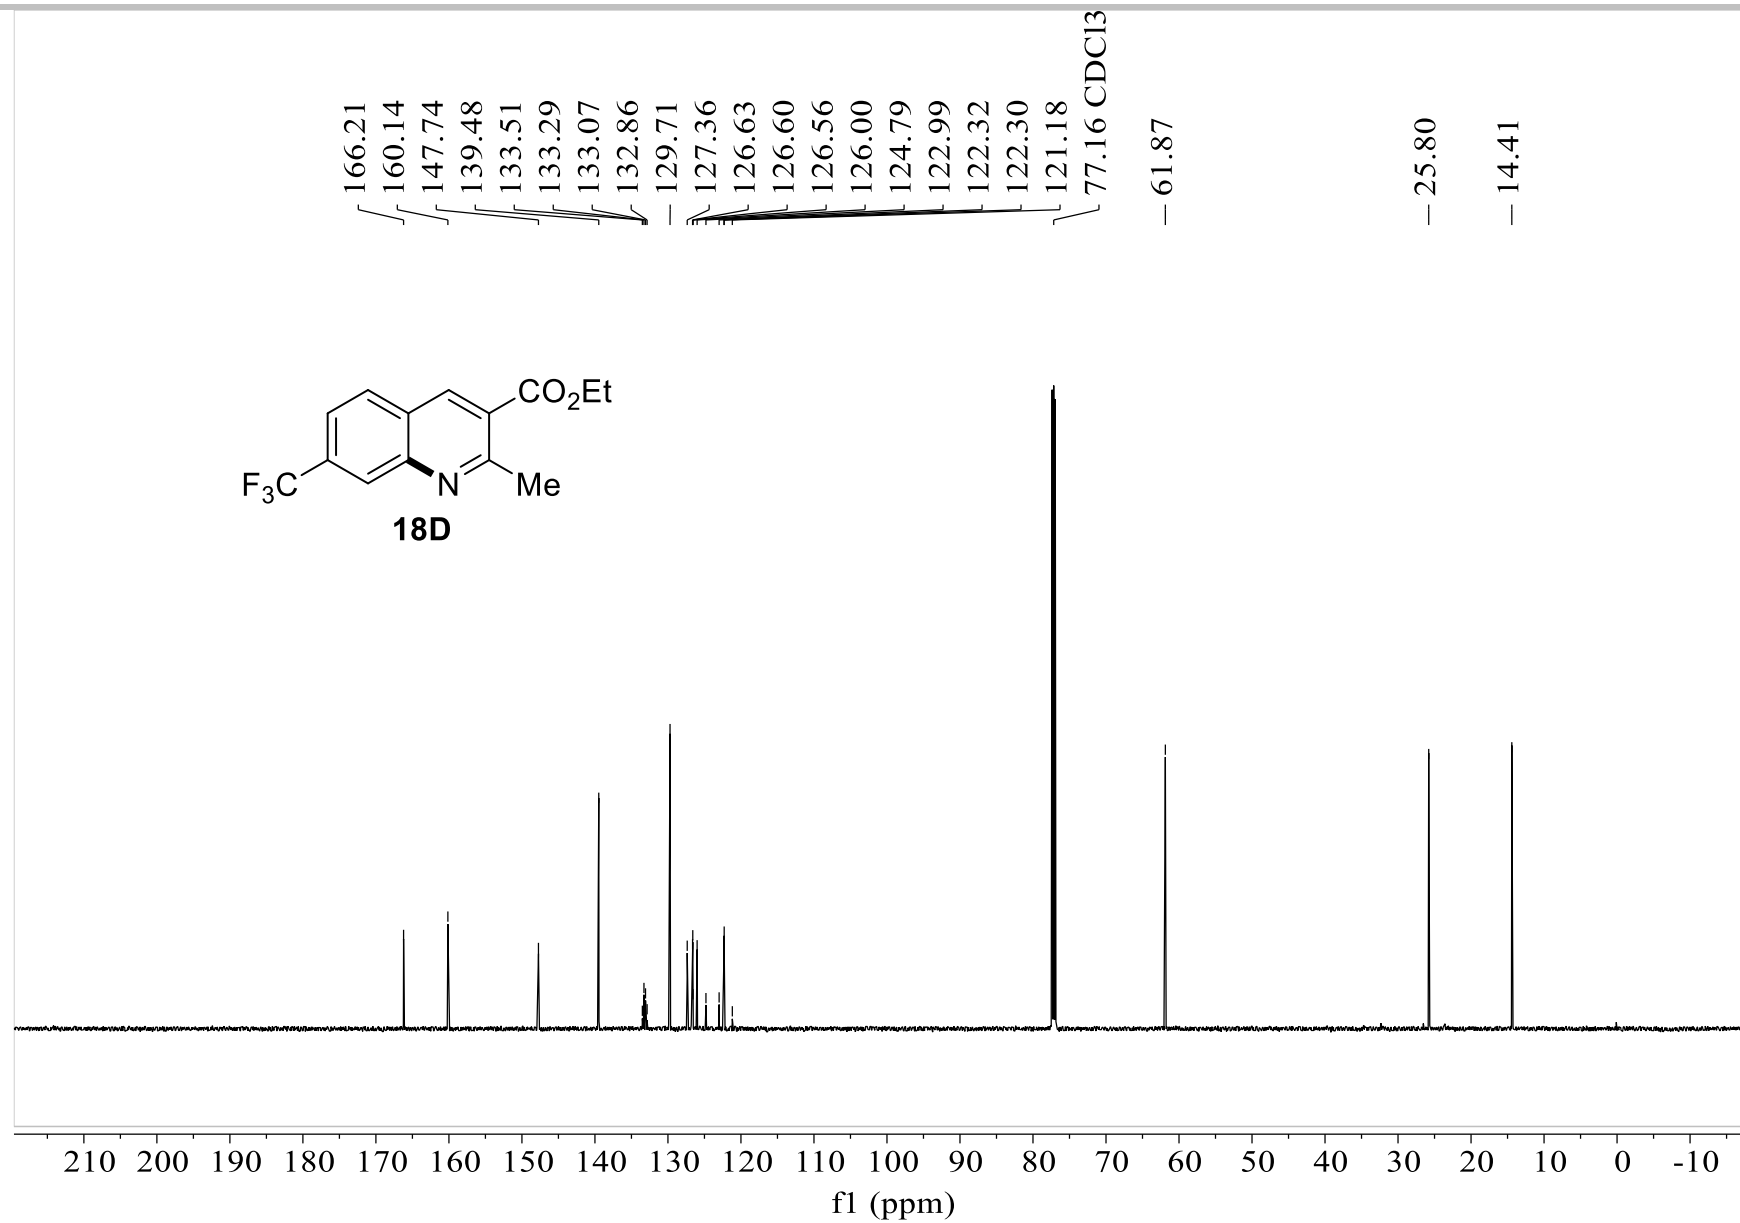

SUPPORTING INFORMATION

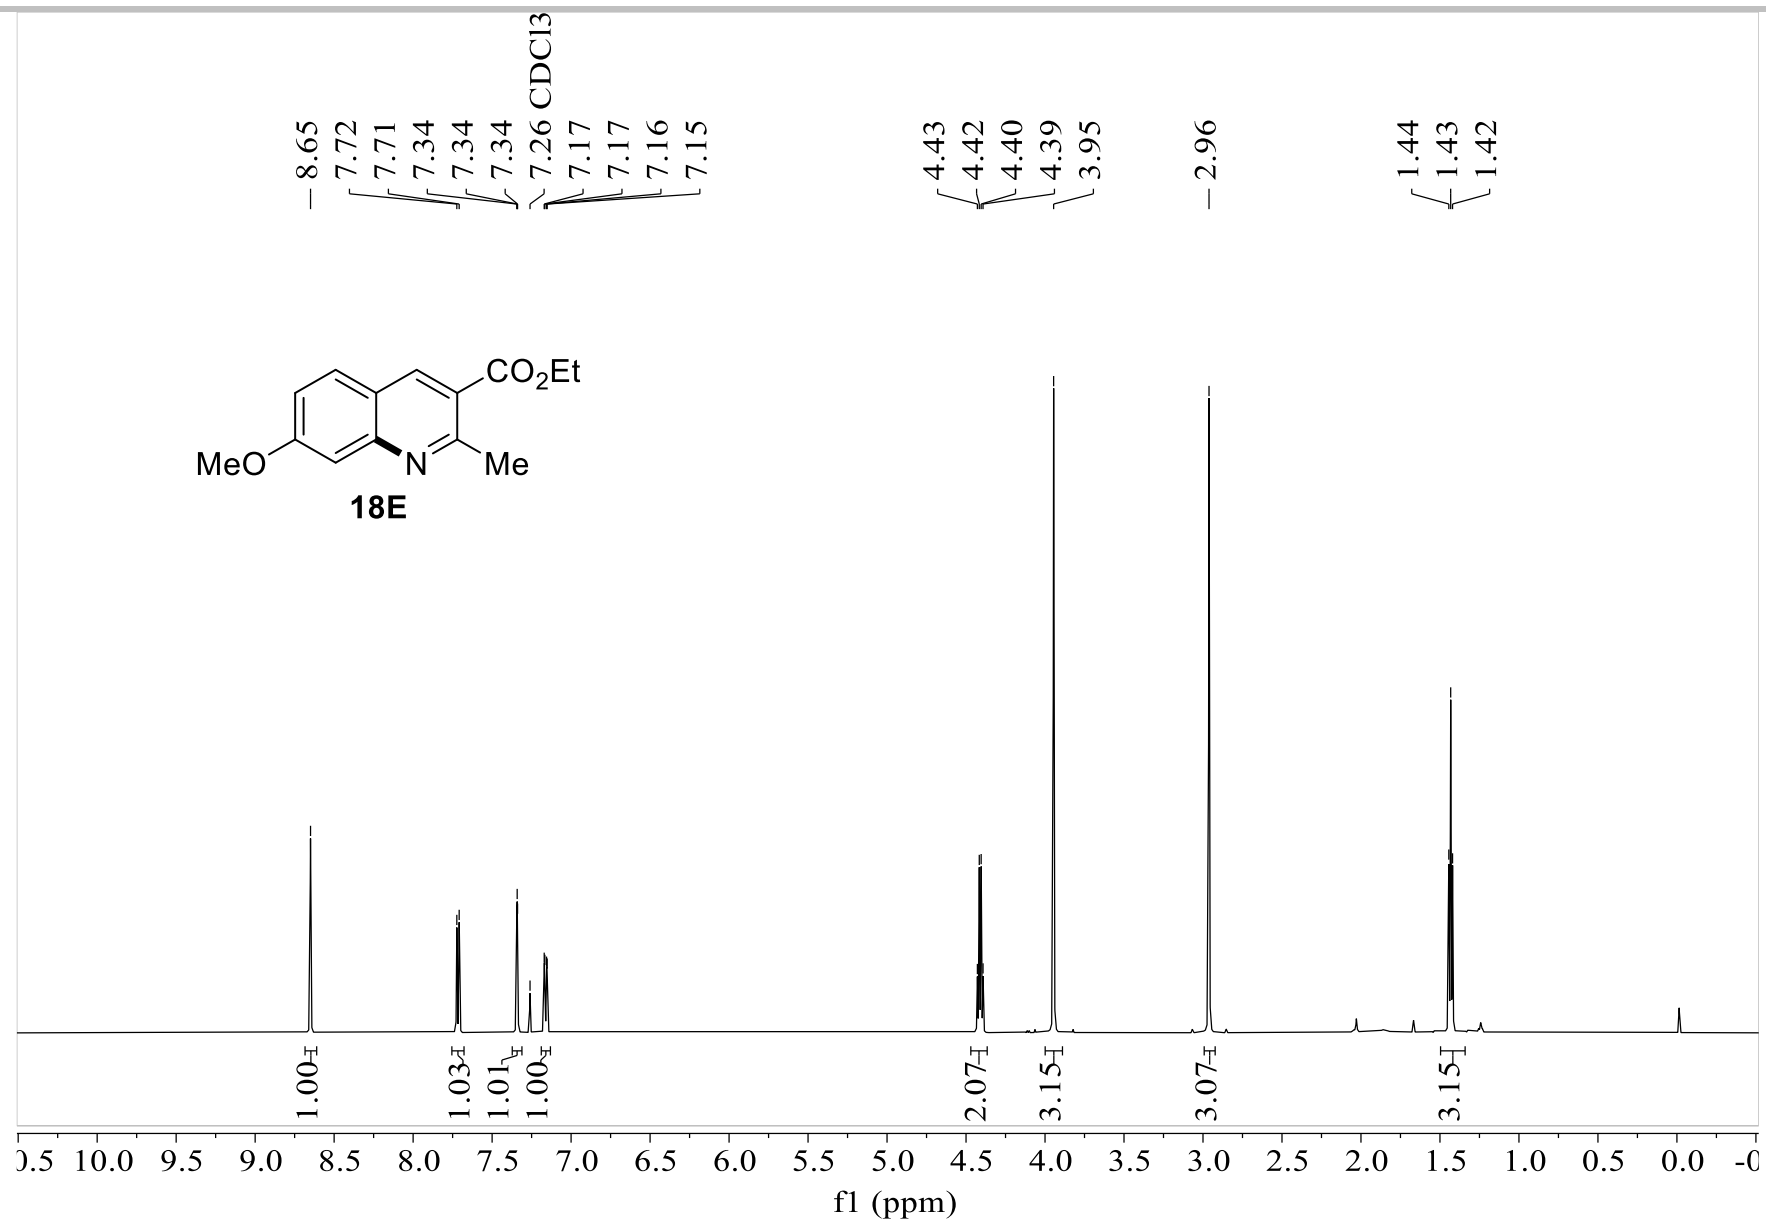

# SUPPORTING INFORMATION

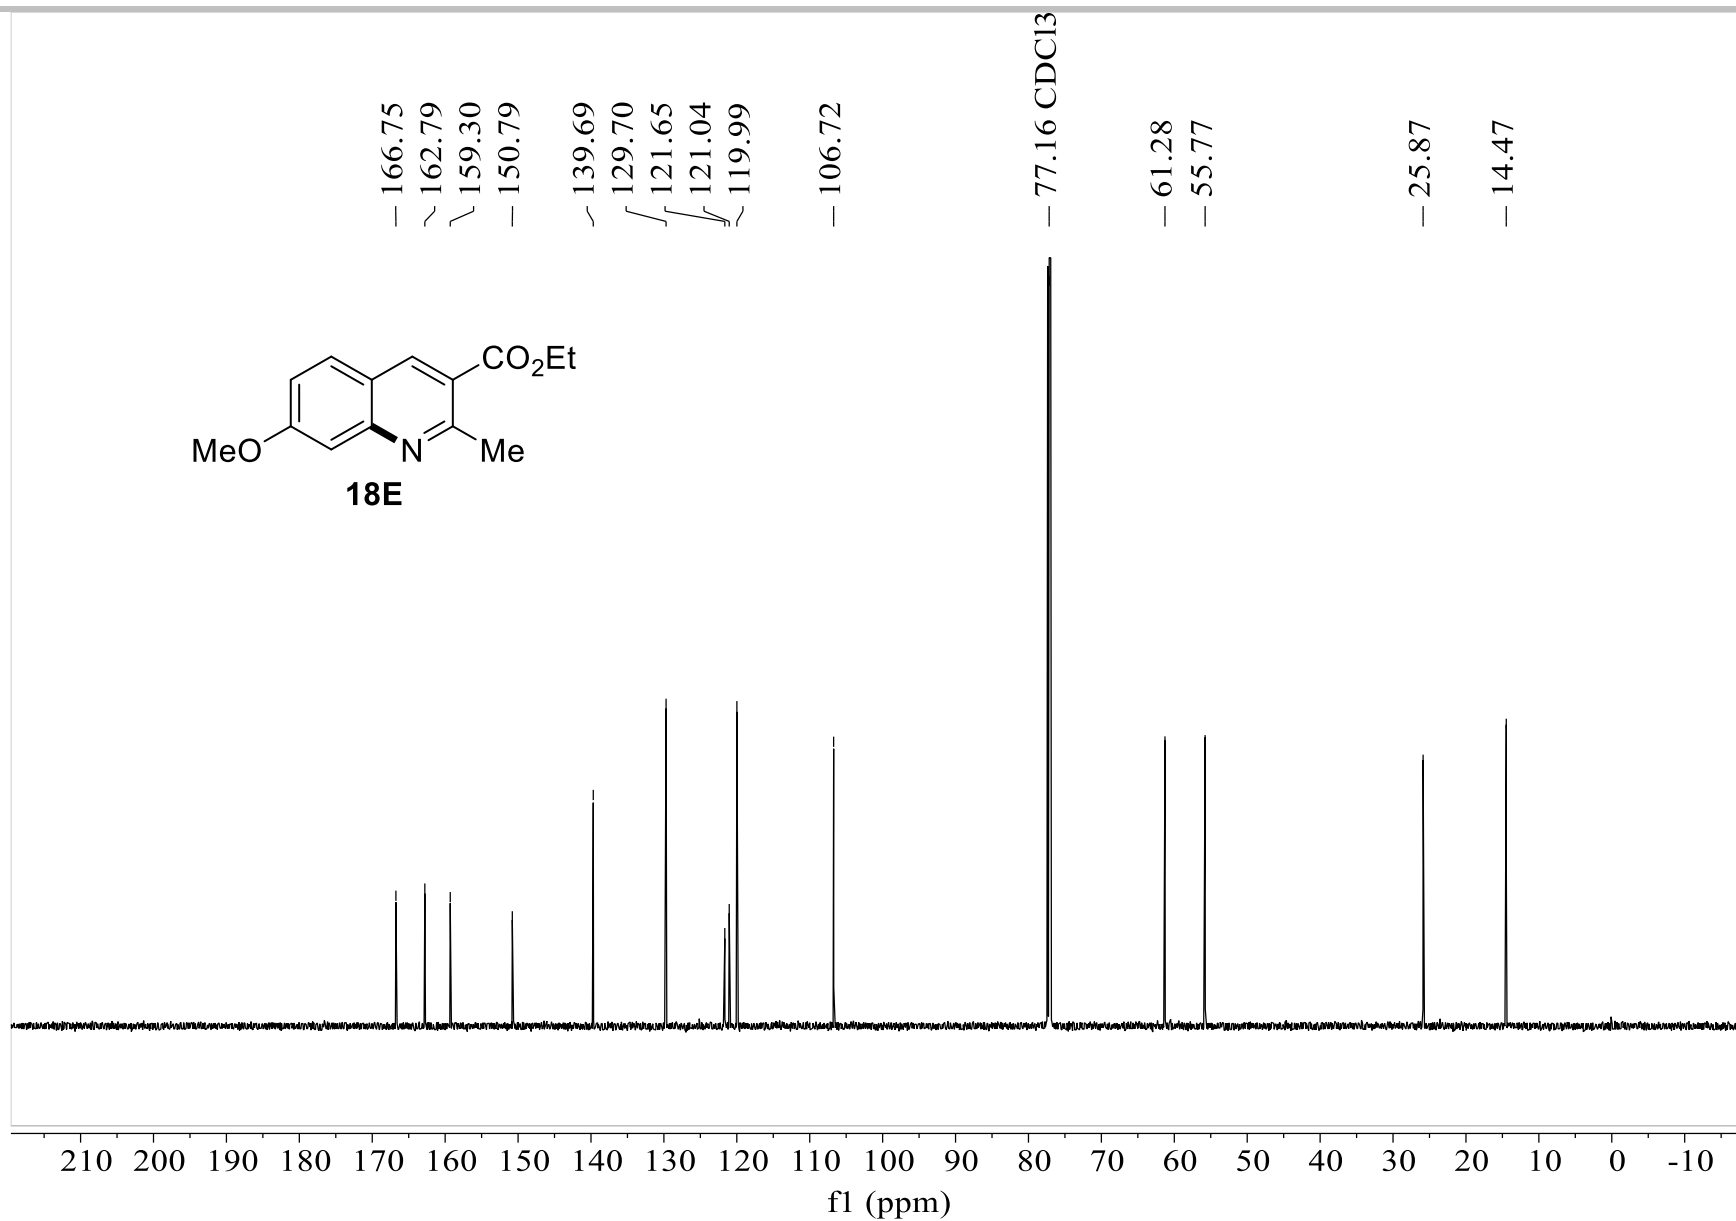

SUPPORTING INFORMATION

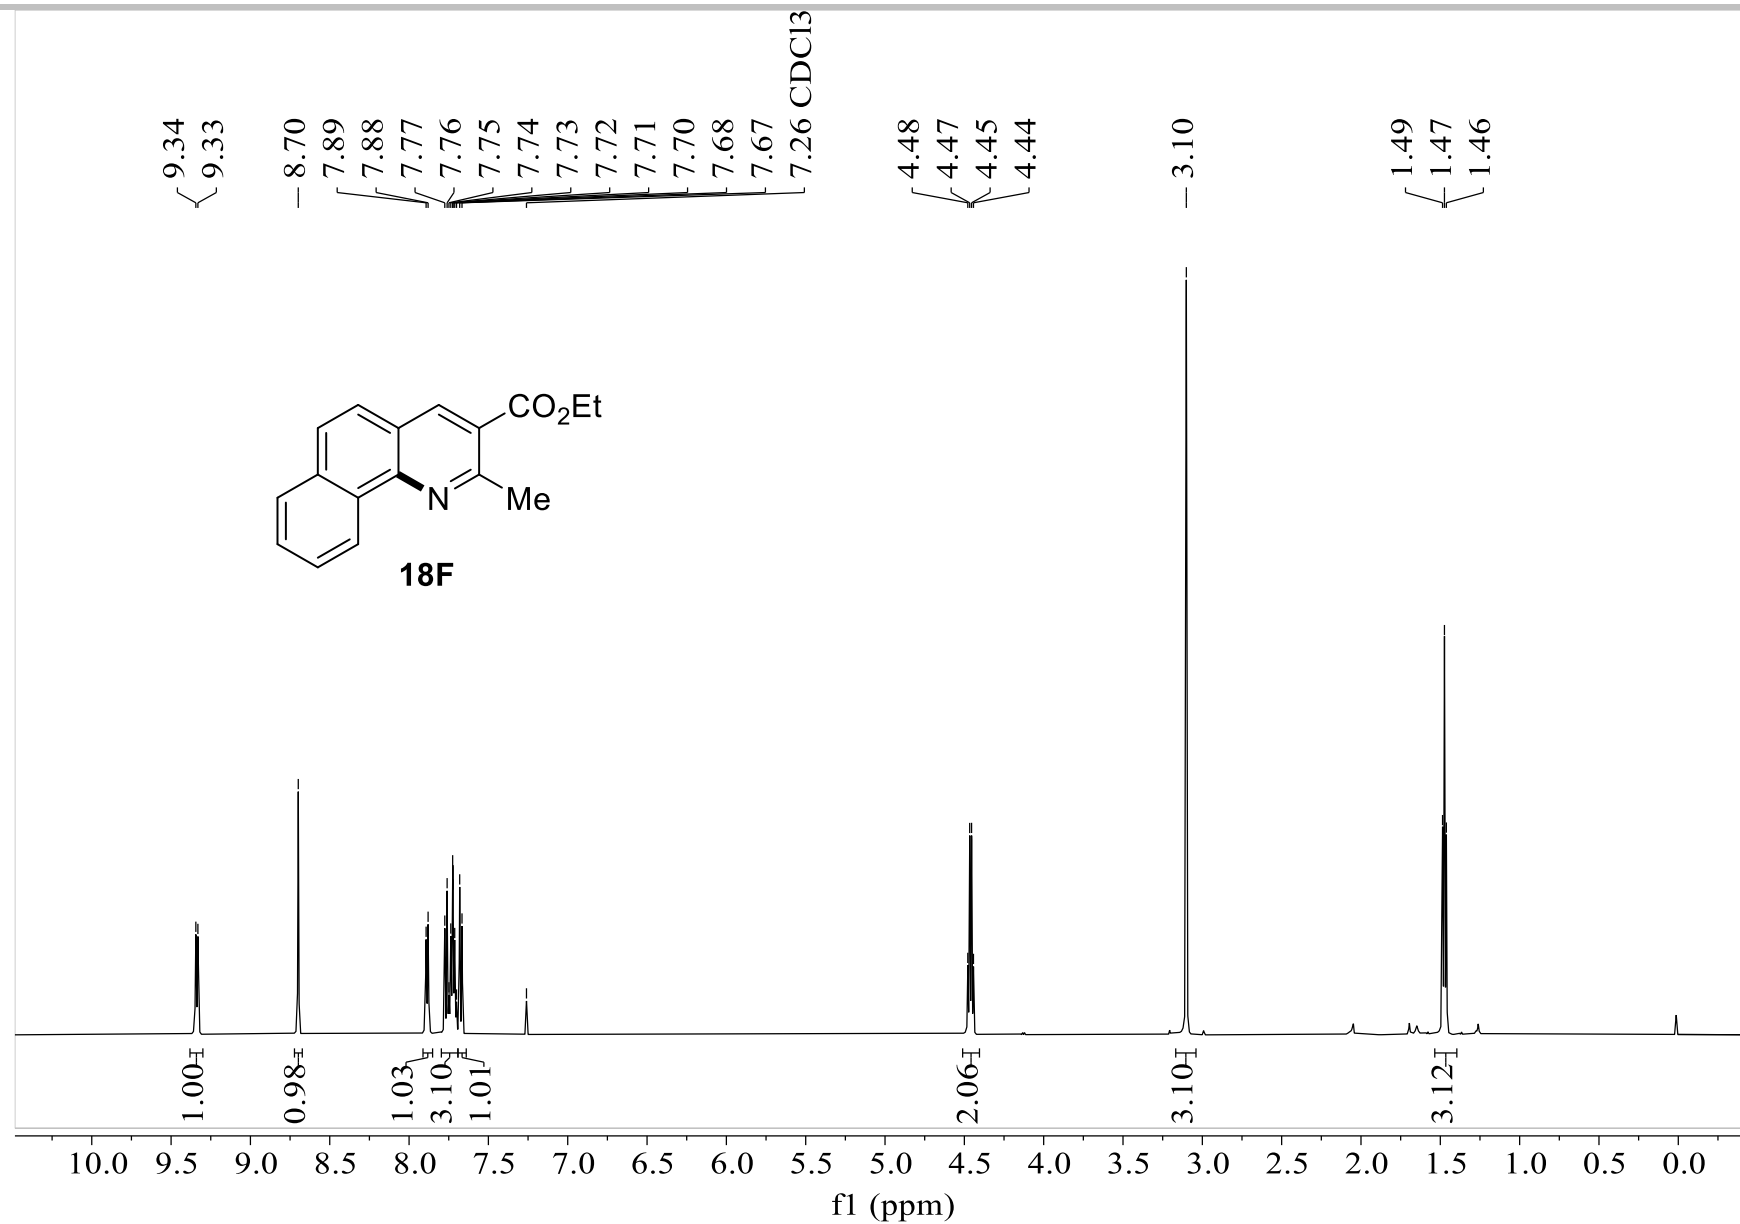



# SUPPORTING INFORMATION

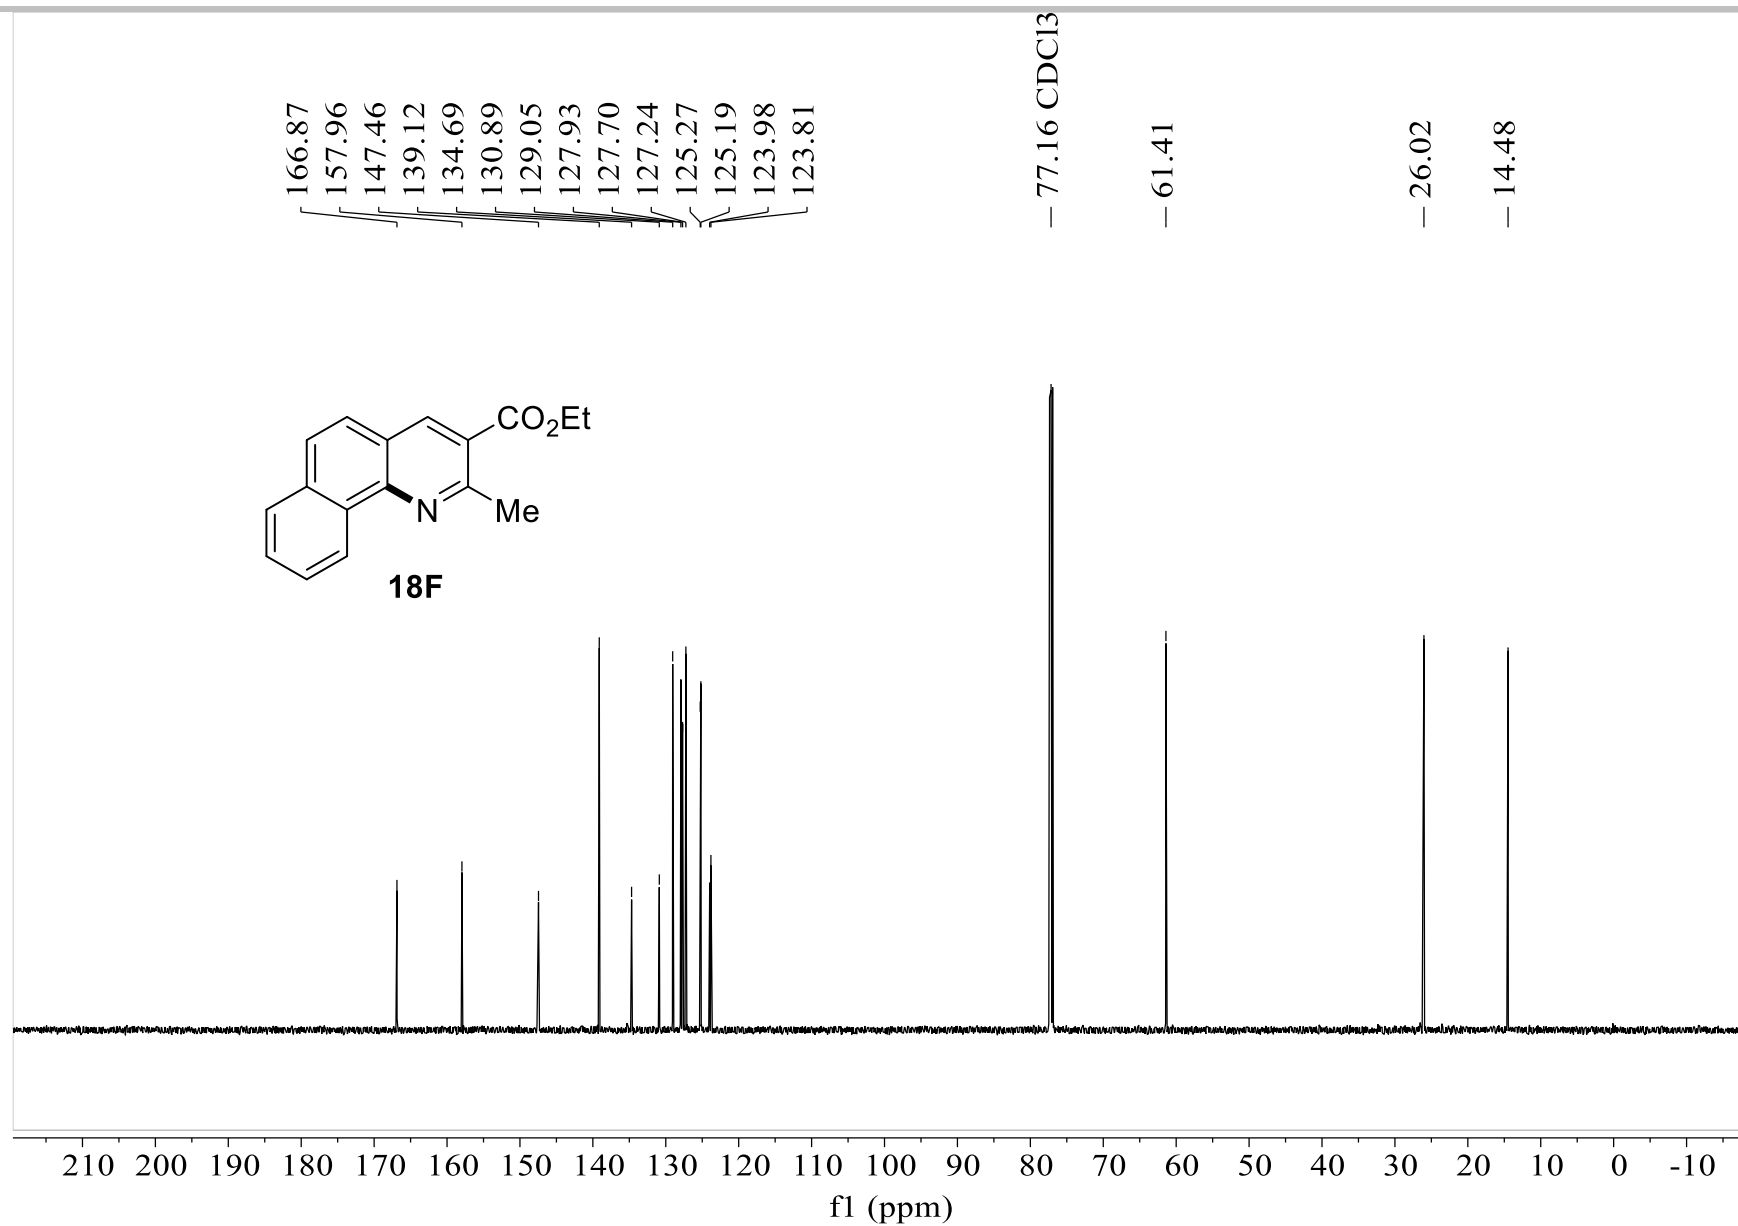

Supplement: d4qo00424h1.pdf [file d4qo00424h1.pdf]
